# Supplementary material for: Modular, stereocontrolled Cβ–H/Cα–C activation of alkyl carboxylic acids
Source: PubMed Central journal article supplement (PMC6500144; doi:10.1073/pnas.1903048116), 2019-04-17
Supplement: pnas.1903048116.sapp.pdf [file pnas.1903048116.sapp.pdf]

Supplementary Information for

## Modular, Stereocontrolled C<sub>β</sub>-H/C<sub>α</sub>-C Activation of Alkyl Carboxylic Acids

Ming Shang<sup>1,†</sup>, Karla S. Feu<sup>1,†</sup>, Julien C. Vantourout<sup>†</sup>, Lisa M. Barton<sup>†</sup>, Heather L. Osswald<sup>†</sup>, Nobutaka Kato<sup>§</sup>, Kerstin Gagaring<sup>‡</sup>, Case W. McNamara<sup>‡</sup>, Gang Chen<sup>†</sup>, Liang Hu<sup>†</sup>, Shengyang Ni<sup>†</sup>, Paula Fernández-Canelas<sup>†</sup>, Miao Chen<sup>†</sup>, Rohan R. Merchant<sup>†</sup>, Tian Qin<sup>†</sup>, Stuart L. Schreiber<sup>1,§</sup>, Bruno Melillo<sup>\*,†,§</sup>, Jin-Quan Yu<sup>\*,†</sup>, Phil S. Baran<sup>\*,†</sup>

<sup>†</sup>Department of Chemistry, Scripps Research, 10550 North Torrey Pines Road, La Jolla, California 92037

<sup>‡</sup>California Institute for Biomedical Research (Calibr), La Jolla, California 92037

<sup>§</sup>Chemical Biology and Therapeutics Science Program, Broad Institute, Cambridge, Massachusetts 02142

<sup>1</sup>Department of Chemistry and Chemical Biology, Harvard University, Cambridge, Massachusetts 02138

Corresponding authors:

Phil S. Baran: pbaran@scripps.edu

Jin Q. Yu: yu200@scripps.edu

Bruno Melillo: bmelillo@scripps.edu

## Table of contents

|                                                                                                                                       |           |
|---------------------------------------------------------------------------------------------------------------------------------------|-----------|
| <b>Table of contents.....</b>                                                                                                         | <b>2</b>  |
| <b>General Experimental .....</b>                                                                                                     | <b>10</b> |
| <b>General procedures.....</b>                                                                                                        | <b>11</b> |
| <b>General Procedure A1: Asymmetric <math>sp^3</math> C–H arylation sequence For Linear and Strained-Ring Systems .....</b>           | <b>11</b> |
| A1.1: Installation of Directing Group.....                                                                                            | 11        |
| A1.2: C–H Activation .....                                                                                                            | 12        |
| A1.3: Removal Directing Group.....                                                                                                    | 13        |
| A1.4: C–H Activation - free carboxylic acid .....                                                                                     | 15        |
| A1.5 Decarboxylative Borylation using copper catalyst .....                                                                           | 16        |
| <b>General Procedure A2: <math>sp^3</math> C–H Arylation sequence for Azetidine Scaffolds.....</b>                                    | <b>17</b> |
| A2.1: Installation of Directing Group.....                                                                                            | 17        |
| A2.2: C–H Activation .....                                                                                                            | 18        |
| A2.3: Removal Directing Group.....                                                                                                    | 19        |
| <b>General Procedure A3: <math>sp^3</math> C–H Arylation Sequence for Pyrrolidine, Tetrahydrofuran and Piperidine Scaffolds .....</b> | <b>20</b> |
| A3.1: Installation of Directing Group.....                                                                                            | 20        |
| A3.2: C–H Activation .....                                                                                                            | 21        |
| A3.3: Removal Directing Group.....                                                                                                    | 22        |
| Graphical Supporting Information for Pyrrolidine, Piperidine and Tetrahydrofuran Scaffolds .....                                      | 24        |
| <b>General Procedure A4: <math>sp^3</math> C–H Methoxylation Sequence for Morpholine Scaffold.....</b>                                | <b>28</b> |
| A4.1: Installation of Directing Group.....                                                                                            | 28        |
| A4.2: C–H Activation .....                                                                                                            | 29        |
| A4.3: Removal Directing Group and synthesis of RAE.....                                                                               | 30        |
| Graphical Supporting Information for Morpholine Scaffold (General Procedure A4).....                                                  | 31        |

|                                                                                                                    |           |
|--------------------------------------------------------------------------------------------------------------------|-----------|
| Table S1: Optimization of C–H Methoxylation for Morpholine Scaffold.....                                           | 37        |
| <b>General Procedure B: Synthesis of Redox-Active Esters .....</b>                                                 | <b>38</b> |
| Photographic Guide for Redox-active Ester Formation (General Procedure B) .....                                    | 40        |
| <b>General Procedure C1: Nickel-Catalyzed Boronic Acid Suzuki Cross-Coupling.....</b>                              | <b>41</b> |
| Preparation of NiCl <sub>2</sub> •6H <sub>2</sub> O/ligand Stock Solution (0.1 M in DMF) .....                     | 41        |
| Graphical Supporting Information for Preparation of NiCl <sub>2</sub> •6H <sub>2</sub> O/Bathophenanthroline ..... | 42        |
| Procedure for the Suzuki Ni-Catalyzed Decarboxylative Cross-Coupling.....                                          | 43        |
| Graphical Supporting Information for Suzuki type reaction .....                                                    | 45        |
| <b>General Procedure C2: Nickel-catalyzed Negishi Alkylation .....</b>                                             | <b>46</b> |
| Preparation of Alkyl Zinc Reagents from Alkyl Bromides.....                                                        | 46        |
| Procedure for the Ni-catalyzed Decarboxylative Alkylation .....                                                    | 47        |
| <b>General Procedure C3: Nickel-catalyzed Negishi Alkenylation .....</b>                                           | <b>48</b> |
| Synthesis of Alkenylzinc Reagents from Alkenyl Grignard Reagents .....                                             | 48        |
| Procedure for the Ni-catalyzed Decarboxylative Alkenylation .....                                                  | 50        |
| <b>General Procedure C4: Nickel-catalyzed Negishi Arylation.....</b>                                               | <b>51</b> |
| Preparation of ZnCl <sub>2</sub> Solution (1.0 M in THF).....                                                      | 51        |
| Preparation of the Arylzinc Reagents .....                                                                         | 51        |
| Titration of Arylzinc Reagents.....                                                                                | 52        |
| Procedure for the Ni-catalyzed Decarboxylative Arylation.....                                                      | 53        |
| <b>General Procedure C5: Nickel-catalyzed Negishi Ethynylation.....</b>                                            | <b>54</b> |
| Preparation of Nickel/ligand Solution .....                                                                        | 54        |
| Preparation of Ethynylzinc Chloride Solution.....                                                                  | 54        |
| Procedure for the Ni-catalyzed Decarboxylative Ethynylation .....                                                  | 54        |
| <b>General Procedure C6: Iron-catalyzed Kumada Alkynylation .....</b>                                              | <b>54</b> |
| Preparation of Substituted Alkynylmagnesium Bromide Solution.....                                                  | 55        |
| Procedure for the Fe-catalyzed Decarboxylative Alkynylation .....                                                  | 55        |

|                                                                                                                |           |
|----------------------------------------------------------------------------------------------------------------|-----------|
| <b>General Procedure C7: Nickel-catalyzed Boronic Ester Suzuki Cross-Coupling</b> .....                        | <b>56</b> |
| Preparation of Nickel/ligand Solution .....                                                                    | 56        |
| Preparation of B <sub>2</sub> pin <sub>2</sub> /MeLi-Complex Solution.....                                     | 56        |
| <b>General Procedure C8: Nickel-Catalyzed Giese Conjugate Addition</b> .....                                   | <b>57</b> |
| <b>Troubleshooting: Frequently Asked Questions</b> .....                                                       | <b>58</b> |
| <b>C–H Activation</b> .....                                                                                    | <b>58</b> |
| <b>Decarboxylative Cross-Couplings</b> .....                                                                   | <b>59</b> |
| <b>Experimental Procedures and Characterization Data for Linear and Strained-Ring Systems (Figure 2)</b> ..... | <b>61</b> |
| <b>Compound B1</b> .....                                                                                       | <b>61</b> |
| <b>Compound B2</b> .....                                                                                       | <b>62</b> |
| <b>Compound B3</b> .....                                                                                       | <b>63</b> |
| <b>Compound B4</b> .....                                                                                       | <b>64</b> |
| <b>Compound B5</b> .....                                                                                       | <b>65</b> |
| <b>Compound B6</b> .....                                                                                       | <b>66</b> |
| <b>Compound B7</b> .....                                                                                       | <b>67</b> |
| <b>Compound 14</b> .....                                                                                       | <b>68</b> |
| <b>Compound 15</b> .....                                                                                       | <b>69</b> |
| <b>Compound 16</b> .....                                                                                       | <b>70</b> |
| <b>Compound 17</b> .....                                                                                       | <b>71</b> |
| <b>Compound 18</b> .....                                                                                       | <b>72</b> |
| <b>Compound 19</b> .....                                                                                       | <b>73</b> |
| <b>Compound 20</b> .....                                                                                       | <b>74</b> |
| <b>Compound 21</b> .....                                                                                       | <b>75</b> |
| <b>Compound 22</b> .....                                                                                       | <b>76</b> |
| <b>Compound 23</b> .....                                                                                       | <b>77</b> |

|                                                                                                 |           |
|-------------------------------------------------------------------------------------------------|-----------|
| Compound 24 .....                                                                               | 78        |
| <b>Experimental Procedures and Characterization Data for Azetidine Scaffolds (Figure 3–a)</b>   | <b>79</b> |
| Compound B8: .....                                                                              | 79        |
| Compound 26 .....                                                                               | 81        |
| Compound 27 .....                                                                               | 83        |
| Compound 28 .....                                                                               | 85        |
| Compound 29 .....                                                                               | 87        |
| Compound 30 .....                                                                               | 89        |
| Compound 31 .....                                                                               | 91        |
| Compound 32 .....                                                                               | 93        |
| <b>Experimental Procedures and Characterization Data for Pyrrolidine Scaffolds (Figure 3–b)</b> | <b>95</b> |
| .....                                                                                           | 95        |
| Compound B10.....                                                                               | 95        |
| Compound 33 .....                                                                               | 97        |
| Compound 34 .....                                                                               | 99        |
| Compound 35 .....                                                                               | 101       |
| Compound 36 .....                                                                               | 103       |
| Compound 37 .....                                                                               | 105       |
| Compound 38 .....                                                                               | 107       |
| Compound 39 .....                                                                               | 109       |
| Compound 40 .....                                                                               | 111       |
| Compound B11 .....                                                                              | 113       |
| Compound 41 .....                                                                               | 115       |
| Compound 42 .....                                                                               | 117       |
| Compound 43 .....                                                                               | 119       |
| Compound 44 .....                                                                               | 121       |

|                                                                                                             |            |
|-------------------------------------------------------------------------------------------------------------|------------|
| Compound B15.....                                                                                           | 123        |
| Compound 45 .....                                                                                           | 124        |
| <b>Experimental Procedures and Characterization Data for Tetrahydrofuran Scaffolds (Figure 3 – c) .....</b> | <b>125</b> |
| Compound SI-39: .....                                                                                       | 125        |
| Compound SI-40: .....                                                                                       | 126        |
| Compound SI-41: .....                                                                                       | 127        |
| Compound A9: .....                                                                                          | 128        |
| Compound B12: .....                                                                                         | 129        |
| Compound 46 .....                                                                                           | 131        |
| Compound 47 .....                                                                                           | 133        |
| Compound 48 .....                                                                                           | 135        |
| Compound 49 .....                                                                                           | 137        |
| Compound 50 .....                                                                                           | 139        |
| Compound 51 .....                                                                                           | 141        |
| Compound 52 .....                                                                                           | 143        |
| <b>Experimental Procedures and Characterization Data for Piperidine (C-2)- Scaffolds (Figure 3–d).....</b>  | <b>145</b> |
| Compound B13.....                                                                                           | 145        |
| Compound 53 .....                                                                                           | 147        |
| Compound 54 .....                                                                                           | 149        |
| Compound 55 .....                                                                                           | 151        |
| Compound 56 .....                                                                                           | 153        |
| Compound 57 .....                                                                                           | 155        |
| Compound 58 .....                                                                                           | 157        |
| Compound 59 .....                                                                                           | 159        |

|                                                                                                                                     |     |
|-------------------------------------------------------------------------------------------------------------------------------------|-----|
| <b>Experimental Procedures and Characterization Data for Piperidine (C-3)- Scaffolds (Figure 3–e)</b> .....                         | 161 |
| <b>Compound B14</b> .....                                                                                                           | 161 |
| <b>Compound 60</b> .....                                                                                                            | 163 |
| <b>Compound 62</b> .....                                                                                                            | 167 |
| <b>Compound 63</b> .....                                                                                                            | 169 |
| <b>Compound 64</b> .....                                                                                                            | 171 |
| <b>Compound 65</b> .....                                                                                                            | 173 |
| <b>Experimental Procedures and Characterization Data for Morpholine Scaffolds (Figure 3–e)</b><br>.....                             | 175 |
| <b>Compound SI-3</b> .....                                                                                                          | 175 |
| <b>Compound SI-4</b> .....                                                                                                          | 177 |
| <b>Compound B16</b> .....                                                                                                           | 179 |
| <b>Compound 66</b> .....                                                                                                            | 181 |
| <b>Compound 67</b> .....                                                                                                            | 183 |
| <b>Compound 68</b> .....                                                                                                            | 185 |
| <b>Experimental Procedures and Characterization Data for hit-to-lead candidates and late-stage intermediates (Figure 4)</b> .....   | 187 |
| <b>Compound SI-42</b> .....                                                                                                         | 187 |
| <b>Compound 69</b> .....                                                                                                            | 189 |
| <b>Compound SI-43</b> .....                                                                                                         | 190 |
| <b>Compound A13</b> .....                                                                                                           | 191 |
| <b>Compound 5</b> .....                                                                                                             | 193 |
| <b>Unsuccessful or Challenging Substrates</b> .....                                                                                 | 196 |
| <b>Morpholine Scaffold: C-H <math>sp^3</math> Arylation</b> .....                                                                   | 196 |
| Table S2: <i>8-Aminoquinoline as directing group</i> : Screening of Bases and solvents using Pd(OAc) <sub>2</sub> as catalyst. .... | 196 |

|                                                                                                                                               |            |
|-----------------------------------------------------------------------------------------------------------------------------------------------|------------|
| Table S3: <i>Boc as protecting group</i> : Screening of Bases and solvents using Pd(OAc) <sub>2</sub> as catalyst. ....                       | 197        |
| Table S4: <i>PIP as directing group</i> : Screening of Bases and solvents using Pd(OAc) <sub>2</sub> as catalyst. ....                        | 198        |
| <b>Morpholine Scaffold: C-H sp<sup>3</sup> Methylation and Alkynylation .....</b>                                                             | <b>199</b> |
| Table S5: Screening of conditions for C-H sp <sup>3</sup> Methylation .....                                                                   | 199        |
| Table S6: Screening of conditions for C-H sp <sup>3</sup> Alkynylation.....                                                                   | 199        |
| <b>Piperazine Scaffold: C-H sp<sup>3</sup>alkoxylation and arylation .....</b>                                                                | <b>200</b> |
| Table S7: Screening of conditions for C-H sp <sup>3</sup> Alkoxylation.....                                                                   | 200        |
| Table S8: <i>8-Aminoquinoline as directing group</i> : Screening of conditions for arylation. ...                                             | 201        |
| Table S9: <i>2-thiomethylaniline as directing group</i> : Screening of conditions for arylation..                                             | 201        |
| <b>Experimental Procedures and Characterization Data for BRD8468 (74) (Figure 5-a).....</b>                                                   | <b>202</b> |
| <b>Synthetic route to compound BRD8468 (74).....</b>                                                                                          | <b>202</b> |
| <b>Compound BRD8468 .....</b>                                                                                                                 | <b>203</b> |
| <b>Experimental Procedures and Characterization Data for the synthesis of BRD8468 analogs (Figure 5-b) .....</b>                              | <b>204</b> |
| <b>Compound SI- 44 .....</b>                                                                                                                  | <b>204</b> |
| <b>Compound 74 .....</b>                                                                                                                      | <b>205</b> |
| <b>Compound SI-45 .....</b>                                                                                                                   | <b>206</b> |
| <b>Compound A15.....</b>                                                                                                                      | <b>208</b> |
| <b>Compound A16.....</b>                                                                                                                      | <b>209</b> |
| <b>Compound B9.....</b>                                                                                                                       | <b>210</b> |
| <b>X-Ray Crystallographic Data Compound B9 .....</b>                                                                                          | <b>211</b> |
| Table S10. Crystal data and structure refinement for Baran705.....                                                                            | 212        |
| Table S11. Atomic coordinates ( x 10 <sup>4</sup> ) and equivalent isotropic displacement parameters (Å <sup>2</sup> x 10 <sup>3</sup> )..... | 213        |
| <b>Compound SI-46 and 73.....</b>                                                                                                             | <b>215</b> |



|                                                                                                                                                                                                                                                                       |            |
|-----------------------------------------------------------------------------------------------------------------------------------------------------------------------------------------------------------------------------------------------------------------------|------------|
| N-(((2 <i>S</i> ,3 <i>S</i> )-3-(4'-fluoro-[1,1'-biphenyl]-4-yl)-1-(3,3,3-trifluoropropyl)azetidin-2-yl)methyl)cyclopentanamine (73) .....                                                                                                                            | 216        |
| Compound 75 .....                                                                                                                                                                                                                                                     | 217        |
| Compound 76 .....                                                                                                                                                                                                                                                     | 221        |
| Compound 77 .....                                                                                                                                                                                                                                                     | 224        |
| Compound SI-50 .....                                                                                                                                                                                                                                                  | 227        |
| Compound 78 .....                                                                                                                                                                                                                                                     | 228        |
| Compound 80 .....                                                                                                                                                                                                                                                     | 230        |
| Compound 79 .....                                                                                                                                                                                                                                                     | 231        |
| Compound 81 .....                                                                                                                                                                                                                                                     | 232        |
| Compound 82 .....                                                                                                                                                                                                                                                     | 233        |
| Compound 83 .....                                                                                                                                                                                                                                                     | 234        |
| <b>Biological assays: Comments, Procedures and Results (Figure 5-c) .....</b>                                                                                                                                                                                         | <b>235</b> |
| <b>Importance of the trans-relationship between the biaryl substituent and the vicinal group .....</b>                                                                                                                                                                | <b>235</b> |
| <b>Example of tolerated diversity at azetidine nitrogen.....</b>                                                                                                                                                                                                      | <b>235</b> |
| <b>Materials .....</b>                                                                                                                                                                                                                                                | <b>236</b> |
| <b>Methods.....</b>                                                                                                                                                                                                                                                   | <b>236</b> |
| <b>Table S12. <i>In vitro</i> antimalarial potency and cytotoxicity of synthesized di- and tri-substituted azetidines (s.d. = standard deviation, n = number of biological replicates). 240</b>                                                                       |            |
| <b>Table S13. <i>In vitro</i> antimalarial potency and cytotoxicity of selected azetidines and reference compounds. Compound 80 remains equipotent against <i>Pf</i> drug-resistant strains (s.d. = standard deviation, n = number of biological replicates).....</b> | <b>241</b> |
| <b>NMR Spectra.....</b>                                                                                                                                                                                                                                               | <b>242</b> |
| <b>References .....</b>                                                                                                                                                                                                                                               | <b>488</b> |

## General Experimental

Tetrahydrofuran (THF), *N,N*-dimethylformamide (DMF), toluene, acetonitrile (CH<sub>3</sub>CN), and dichloromethane (CH<sub>2</sub>Cl<sub>2</sub>) were obtained by passing the previously degassed solvents through an activated alumina column. Reagents were purchased at the highest commercial quality and used without further purification, unless otherwise stated. NiCl<sub>2</sub>•glyme and Ni(acac)<sub>2</sub>•xH<sub>2</sub>O were purchased from Strem. Bipyridine ligands (2,2'-bipyridine, 4,4'-di-*tert*-butylbipyridine and 4,4'-di-OMe-bipyridine) were purchased from Sigma-Aldrich. Bathophenanthroline was purchased from Combi-Blocks. Yields refer to chromatographically and spectroscopically (<sup>1</sup>H NMR) homogeneous material, unless otherwise stated. Reactions were monitored by LC/MS, and thin layer chromatography (TLC). TLC was performed using 0.25 mm E. Merck Silica plates (60F-254), using short-wave UV light as the visualizing agent, and phosphomolybdic acid and Ce(SO<sub>4</sub>)<sub>2</sub>, acidic ethanolic anisaldehyde, or KMnO<sub>4</sub> as developing agents upon heating. NMR spectra were recorded on Bruker DRX-600, DRX-500, and AMX-400 instruments and are calibrated using residual undeuterated solvent (CHCl<sub>3</sub> at 7.26 ppm <sup>1</sup>H NMR, 77.16 ppm <sup>13</sup>C NMR; acetone at 2.09 ppm <sup>1</sup>H NMR, 205.87, 30.60 ppm <sup>13</sup>C NMR; CH<sub>3</sub>OH at 3.34 ppm <sup>1</sup>H NMR, 49.86 ppm <sup>13</sup>C NMR; C<sub>6</sub>H<sub>6</sub> at 7.15 ppm <sup>1</sup>H NMR, 128.62 ppm <sup>13</sup>C NMR). The following abbreviations were used to explain multiplicities: s = singlet, d = doublet, t = triplet, q = quartet, m = multiplet, br = broad. Column chromatography was performed using E. Merck Silica (60, particle size 0.043–0.063 mm), and pTLC was performed on Merck Silica plates (60F-254). High-resolution mass spectra (HRMS) were recorded on an Agilent LC/MSD TOF mass spectrometer by electrospray ionization time of flight reflection experiments. Melting points were recorded on a Fisher-Johns 12-144 melting point apparatus and are uncorrected. The enantiomeric excesses were determined with Waters UPC<sup>2</sup> SFC equipped with a photodiode array detector or an Agilent Technologies 1220 Infinity II LC HPLC. Optical rotations were recorded on a Rudolph Research Analytical Autopol III Automatic Polarimeter.

## General procedures

### General Procedure A1: Asymmetric $sp^3$ C–H arylation sequence For Linear and Strained-Ring Systems

#### A1.1: Installation of Directing Group

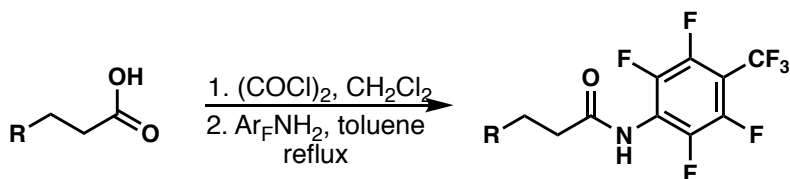

The amides were prepared according to a previously reported procedure.<sup>1</sup>

The carboxylic acid (1 equiv.) was suspended in anhydrous  $\text{CH}_2\text{Cl}_2$  (0.36 M) under argon atmosphere. Oxalyl chloride (1.2 equiv.) and *N,N*-dimethylformamide (0.06 equiv.) were added carefully to the mixture (gas evolution observed). Upon completion, monitored by TLC, the solution was concentrated *in vacuo* to afford the acid chloride, which was used immediately in the next reaction without characterization. Then, the acid chloride was added to a vigorously stirred solution of 2,3,5,6-tetrafluoro-4-(trifluoromethyl)aniline ( $\text{Ar}_F\text{NH}_2$ ) (1.1 equiv.) in toluene (1 M). The reaction mixture was stirred for 12 hours under reflux, then it was cooled to room temperature and concentrated under vacuum, followed recrystallization in EtOAc:Hexanes to give the desired product.

## A1.2: C–H Activation

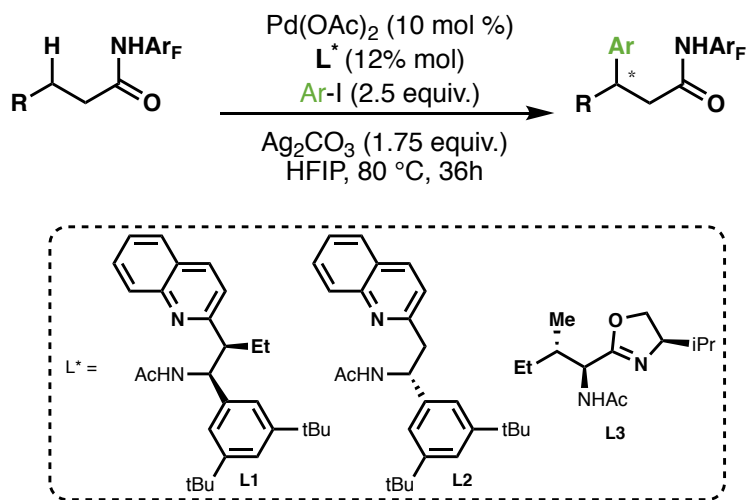

Arylations were carried out according to a previously reported procedure.<sup>2</sup>

The amide (1 equiv.),  $\text{Pd(OAc)}_2$  (10 mol%), ligand  $\text{L}^*$  (12 mol%), and  $\text{Ag}_2\text{CO}_3$  (2 equiv.) were weighed in air and placed in a sealed tube (100 mL) with a magnetic stir bar. To the reaction mixture, aryl iodide (2 equiv.) and HFIP (0.1M) were added. The reaction mixture was first stirred at room temperature for 10 minutes and then heated to 80 °C for 36 hours under vigorous stirring. Upon completion, the reaction mixture was cooled to room temperature and filtered through Celite<sup>®</sup> using  $\text{CH}_2\text{Cl}_2$ . The solvents were removed *in vacuo* and the resulting mixture was purified by a preparative TLC using Hexanes:EtOAc (5:1) or Toluene:EtOAc (30:1) as the eluent. In the  $^{13}\text{C}$  NMR analysis, peaks that correspond to those of the polyfluoroarylamide auxiliary appeared as nearly invisible, complex sets of multiplets; they are omitted in the following spectroscopic analysis.

### A1.3: Removal Directing Group

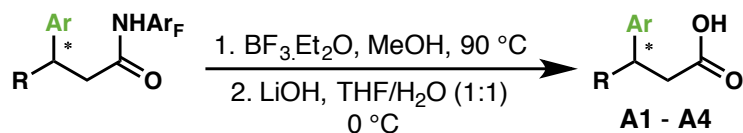

A sealable pressure flask was charged with MeOH (0.025 M) and amide. Et<sub>2</sub>O•BF<sub>3</sub> (35 equiv.) was added and the reaction vessel sealed. The reaction mixture was heated to 100 °C for 12 hours under vigorous stirring. Upon completion, the reaction mixture was cooled to room temperature. The solvent was removed *in vacuo*, H<sub>2</sub>O and EtOAc were added, organic layers were removed, and the aqueous layer was then extracted with EtOAc (3x). The combined organic layers were washed with brine, dried over MgSO<sub>4</sub>, filtered and concentrated. Purification by column chromatography (Hexanes:EtOAc = 2:1 to 1:1) afforded the corresponding ester.

The ester was dissolved in THF (10 mL). The solution was cooled to 0 °C, and a cold solution of LiOH•H<sub>2</sub>O (2 equiv.) in H<sub>2</sub>O (10 mL) was added. The reaction was maintained at 0 °C for 1 hour. The reaction was acidified with 2 M HCl and extracted with EtOAc. The combined organic layers were dried over MgSO<sub>4</sub> and concentrated. The residue was purified by column chromatography (Hexanes:EtOAc:AcOH = 10:10:1).

The following carboxylic acids were prepared according to **General Procedures A1.1-A1.3**:

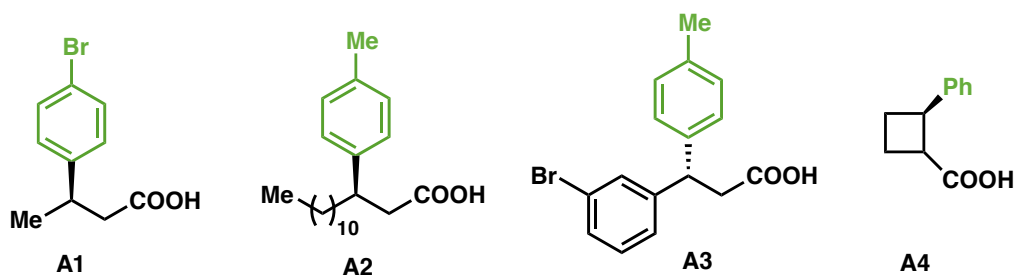

#### A1.4: C–H Activation - free carboxylic acid

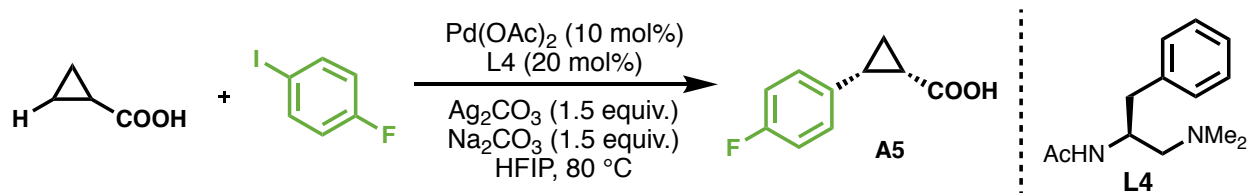

**A5** was prepared according to a previously reported procedure.<sup>3</sup>

A 2-dram vial equipped with a magnetic stir bar was charged with Pd(OAc)<sub>2</sub> (4.4 mg, 10 mol%) and **L4** (8.8 mg, 20 mol%) in HFIP (0.25 mL). The appropriate cyclopropanecarboxylic acid substrate (0.20 mmol), Ag<sub>2</sub>CO<sub>3</sub> (82.7 mg, 0.30 mmol, 1.5 equiv.), Na<sub>2</sub>CO<sub>3</sub> (31.8 mg, 0.30 mmol, 1.5 equiv.) and aryl iodide (0.40 mmol, 2 equiv.) were then added. Subsequently, the vial was capped and closed tightly. The reaction mixture was then stirred at the rate of 200 rpm at 80 °C for 16 hours. After being allowed to cool to room temperature, the mixture was diluted with EtOAc, and 0.1 mL of acetic acid was then added. The mixture was passed through a pad of Celite<sup>®</sup> with EtOAc as the eluent to remove any insoluble precipitates. The resulting solution was concentrated, and the residual mixture was dissolved with a minimal amount of acetone and loaded onto a preparative TLC plate. The pure product was then isolated using preparative TLC with EtOAc:Hexanes (1:4 to 1:1) as the eluent and 1% v/v of acetic acid as the additive.

### A1.5 Decarboxylative Borylation using copper catalyst

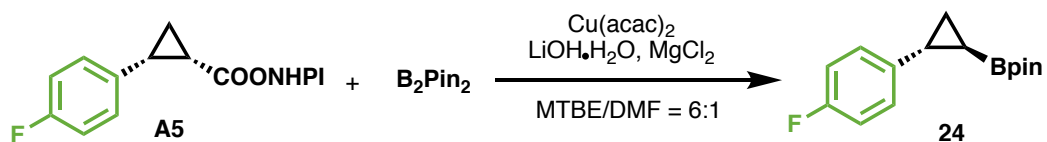

To a 15 mL culture tube equipped with a stir bar were added redox-active ester **A5** (1.0 equiv.),  $B_2pin_2$  (3.0 equiv.),  $LiOH \cdot H_2O$  (15 equiv.),  $Cu(acac)_2$  (30 mol%) and  $MgCl_2$  (1.5 equiv.). The tube was evacuated and backfilled with argon for 3 times. A degassed MTBE:DMF solution (6:1, 0.14 M) was added and the resulting mixture was stirred under 1000 rpm at room temperature until dark brown color was observed (typical reaction time: < 15 min). The reaction mixture was diluted with EtOAc and saturated  $NH_4Cl$ , and the resulting mixture was shaken vigorously until getting a clear biphasic solution. The organic phase was collected, dried over anhydrous  $Na_2SO_4$ , evaporated and purified by silica gel chromatography to afford the desired product **24**.



## General Procedure A2: sp<sup>3</sup> C–H Arylation sequence for Azetidine Scaffolds

### A2.1: Installation of Directing Group

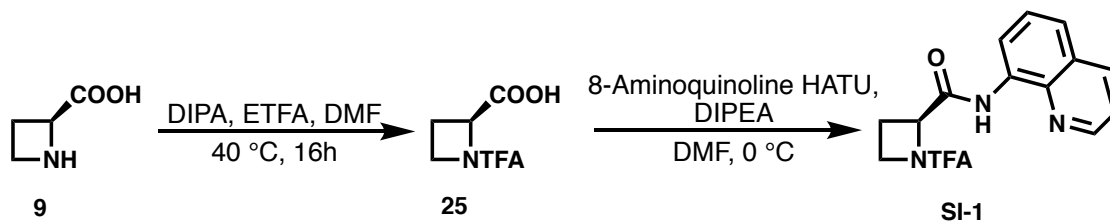

(S)-N-(quinolin-8-yl)-1-(2,2,2-trifluoroacetyl)azetidine-2-carboxamide was prepared according to the previously reported procedure.<sup>4</sup>

A round-bottom flask equipped with stir bar was charged with (S)-azetidine-2-carboxylic acid **9** (1.0 equiv.) and DMF (0.4 M), followed by *N,N*-diisopropylethylamine (DIPEA, 2.0 equiv.) and ethyl trifluoroacetate (5.0 equiv.). The reaction mixture was heated to 40 °C for 16 hours, then excess reagents were removed *in vacuo*. The crude mixture was dissolved in DMF (0.25 M) and cooled to 0 °C before the addition of HATU (1.0 equiv.), 8-aminoquinoline (1.0 equiv.), DIPEA (0.95 equiv.) in sequence. The reaction mixture was maintained at 0 °C until completion. The reaction mixture was then diluted with EtOAc and washed with water (2x) and brine (1x). The resulting organic layer was dried over Na<sub>2</sub>SO<sub>4</sub>, filtered, and concentrated *in vacuo*. Purification by flash column chromatography (EtOAc:Hexanes) provided **SI-1**.

## A2.2: C–H Activation

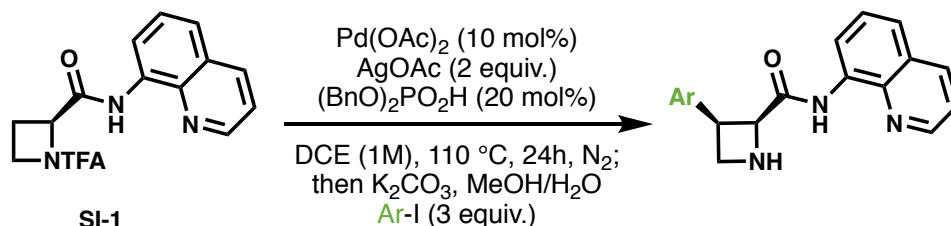

C–H arylation was performed according to a previously reported procedure.<sup>4</sup>

A sealed tube was charged with **SI-1** (1.0 equiv.), dibenzyl phosphate (20 mol%),  $\text{AgOAc}$  (2.0 equiv.), aryl iodide (3.0 equiv.), and  $\text{Pd(OAc)}_2$  (10 mol%). The reaction vessel was evacuated and refilled with inert atmosphere ( $\text{N}_2$ , 3x). DCE (1.0 M) was then added and placed in an oil bath preheated to 110 °C for 24 hours. Then, the reaction mixture was cooled to room temperature and the crude material was transferred to a round-bottom-flask using a 9:1 MeOH: $\text{H}_2\text{O}$  solution (8 mL of solution per 1 mmol reactant), followed by the addition of  $\text{K}_2\text{CO}_3$  (3.0 equiv.). The mixture was allowed to stir at ambient temperature for up to 16 hours before solvent removal *in vacuo*. The resulting crude material was dissolved in  $\text{CH}_2\text{Cl}_2$ , filtered over Celite<sup>®</sup> and concentrated *in vacuo*. The resulting crude material was dissolved in 3:7 *i*-PrOH: $\text{CHCl}_3$ , washed with water (1x) and with brine (1x). The resulting organic layer was dried over  $\text{Na}_2\text{SO}_4$ , filtered, concentrated *in vacuo* before purification by flash column chromatography under the specified conditions.

The following arylated amides were prepared according to the **General Procedure A2.2**:

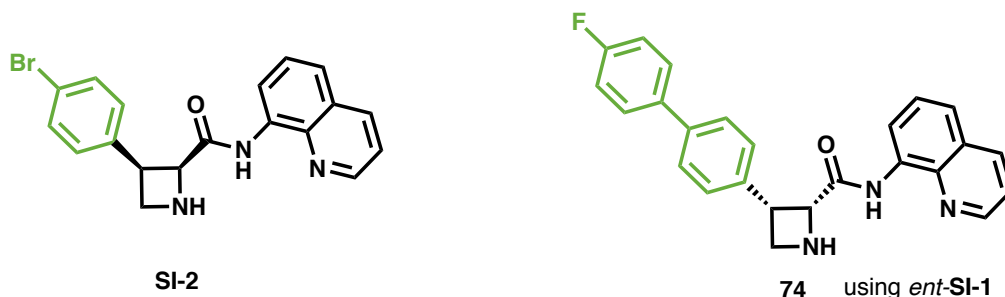

### A2.3: Removal Directing Group

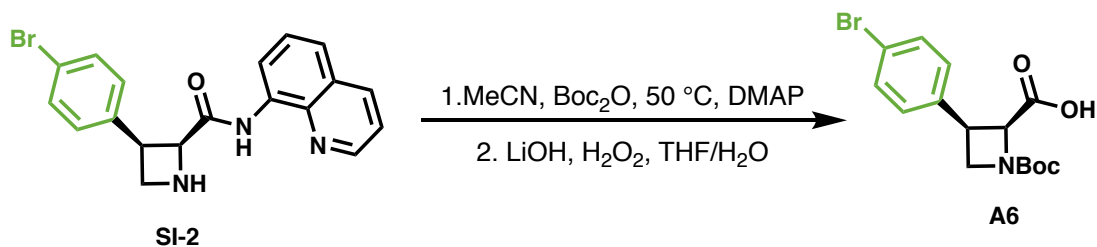

The carboxyl acid **A6** was prepared according to a previously reported procedure.<sup>4</sup>

The arylated product **SI-2** (1.0 equiv.) was added to a round bottom flask and dissolved in MeCN (0.2 M). Boc<sub>2</sub>O (3 equiv.) was added, and the reaction mixture was heated to 50 °C and stirred for 15 minutes, then DMAP (0.1 equiv.) was added, and the mixture was stirred for another 2 hours at 50 °C. The solvent was removed *in vacuo* and the residue was dissolved in THF:H<sub>2</sub>O (2:1, 0.1 M). After cooling the biphasic mixture to 0 °C, 30% aq. H<sub>2</sub>O<sub>2</sub> (10 equiv.) was added followed by LiOH (6 equiv.). The reaction mixture was allowed to reach room temperature, stirred for 1 hour and then heated to 50 °C for 20 hours. The reaction mixture was separated, and the aqueous layer was washed with Et<sub>2</sub>O (3x). The resulting aqueous solution was acidified with 1 M HCl, exhaustively extracted with 3:7 i-PrOH:CHCl<sub>3</sub> (5x) and dried. Concentration *in vacuo* gave the acid **A6** as a solid which was used directly in the following step without further purification.

## General Procedure A3: $sp^3$ C–H Arylation Sequence for Pyrrolidine, Tetrahydrofuran and Piperidine Scaffolds

### A3.1: Installation of Directing Group

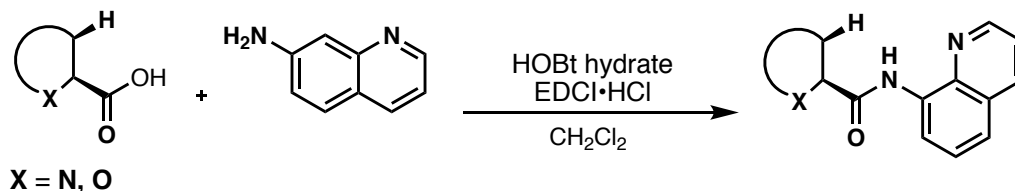

The amides were prepared according to the previously reported procedure.<sup>5</sup>

A round-bottom flask equipped with stir bar was charged with HOBT (1.2 equiv.), carboxylic acid (1 equiv.) and  $\text{CH}_2\text{Cl}_2$  (0.2 M), after 5 minutes stirring at room temperature, EDCI·HCl (1.2 equiv.) was added and the solution was stirred for further 72 hours. The reaction mixture was diluted with  $\text{CH}_2\text{Cl}_2$ , aq. sat.  $\text{NaHCO}_3$  was added and the aqueous layer was extracted with  $\text{CH}_2\text{Cl}_2$  (3x), dried over  $\text{Na}_2\text{SO}_4$  and purified by column chromatography.

### A3.2: C–H Activation

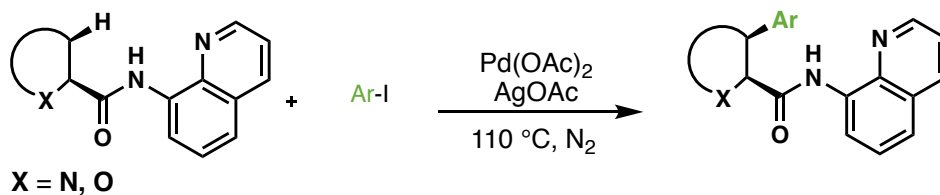

The arylated compounds were prepared according a previously reported procedure.<sup>5</sup>

A sealed tube was charged with amide (1.0 equiv.), AgOAc (2.0 equiv.), aryl iodide (3.0 equiv.) and Pd(OAc)<sub>2</sub> (10 mol%). The tube was flushed with argon and sealed (for tetrahydrofuran scaffolds)\*, then placed in an oil bath preheated to 110 °C and stirred for 38 hours. The reaction mixture was then allowed to cool down to room temperature and EtOAc was added. The resulting solution was filtered through a pad of Celite<sup>®</sup>, eluting with further EtOAc (2x). The solvent was removed *in vacuo*, and the crude material was purified by flash column chromatography.

\*The C–H arylation for pyrroline and piperidine were carried out under air.

### A3.3: Removal Directing Group

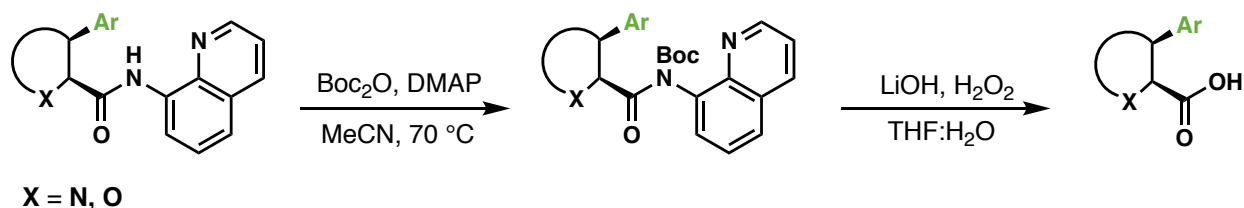

The carboxyl acids were prepared according to the previously reported procedure.<sup>5</sup>

A culture tube equipped with a stir bar was charged with the arylated compound (1.0 equiv.), DMAP (3.0 equiv.) and MeCN (1 M), followed by dropwise addition of (Boc)<sub>2</sub>O (20.0 equiv.) at room temperature. Then, the tube was placed in an oil bath preheated to 110 °C for 1 hour. The mixture was then cooled to room temperature and another equivalent of (Boc)<sub>2</sub>O (10.0 equiv.) and DMAP (3.0 equiv.) was added and the reaction mixture stirred at 70 °C overnight. The culture tube was then allowed to cool to room temperature and the solvent concentrated *in vacuo*. The residue was purified by Silica gel column chromatography to afford the Boc-protected intermediate.

*\*The Boc-protection of pyrroline was carried out using (20 equiv) of (Boc)<sub>2</sub>O and for piperidine and tetrahydrofuran (30 equiv) of (Boc)<sub>2</sub>O.*

To a solution of Boc-amide (1.0 equiv.) in THF:H<sub>2</sub>O (0.1 M, 3:1) were added LiOH•H<sub>2</sub>O (2.0 equiv.) and 30% H<sub>2</sub>O<sub>2</sub> (5.0 equiv) at 0 °C. The reaction mixture was stirred for 20 minutes at 0 °C, then was allowed to warm up to room temperature and stirred for 18 hours. After completion, the mixture was extracted with Et<sub>2</sub>O to remove the organic impurities, the aqueous layer was acidified with 1M aq. HCl to pH=3 and extracted with EtOAc (3x). The combined organic layers were washed with brine, dried over Na<sub>2</sub>SO<sub>4</sub> and concentrated *in vacuo* to afford the carboxylic acid, that was used in subsequent steps without further purification.

The following carboxylic acids were prepared according to the **General Procedure A3**:

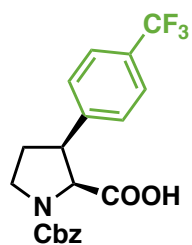

A7

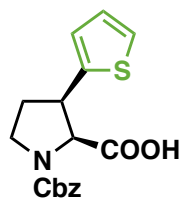

A8

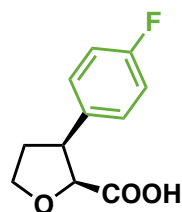

A9

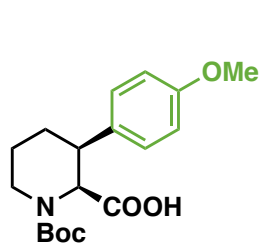

A10

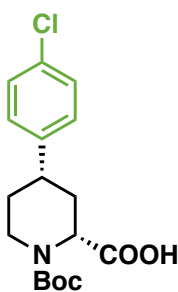

A11

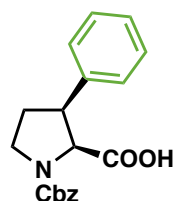

A12

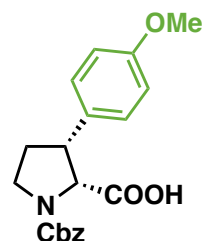

A13

# Graphical Supporting Information for Pyrrolidine, Piperidine and Tetrahydrofuran Scaffolds

## General Procedure A3.2

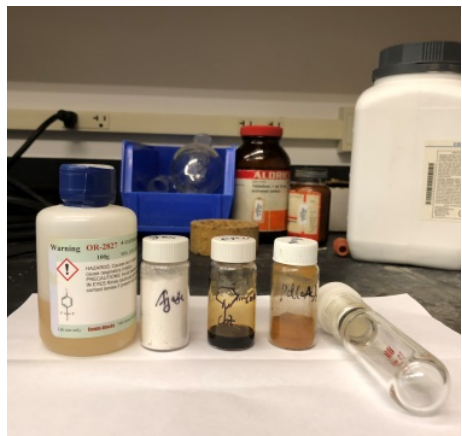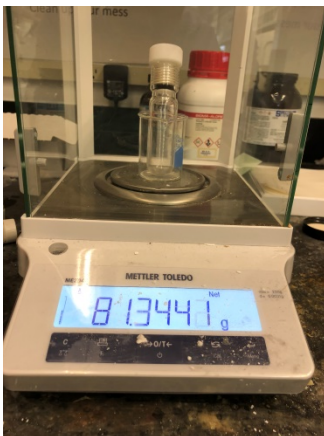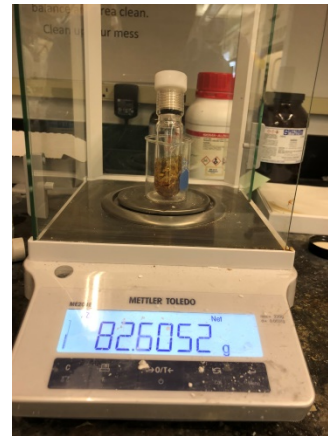

**Left:** Reagents. **Center:** Taring of the sealed tube. **Right:** Addition of amide.

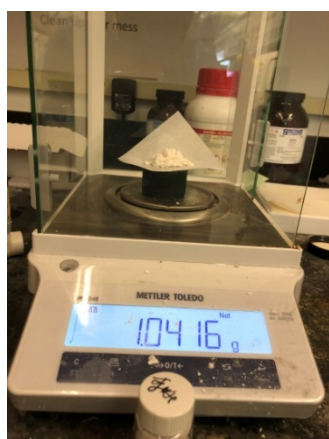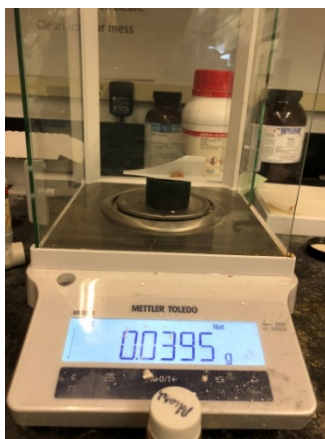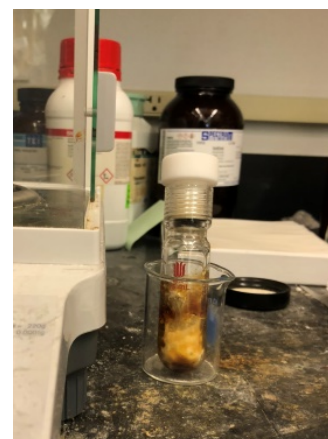

**Left:** AgOAc. **Center:** Pd(OAc)<sub>2</sub>. **Right:** Reaction tube containing all solid reagents.

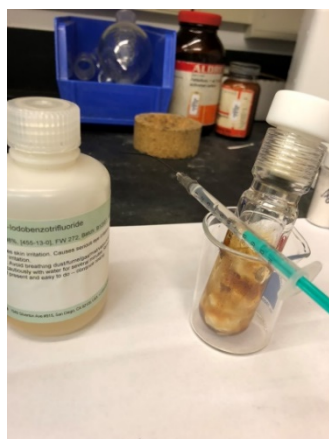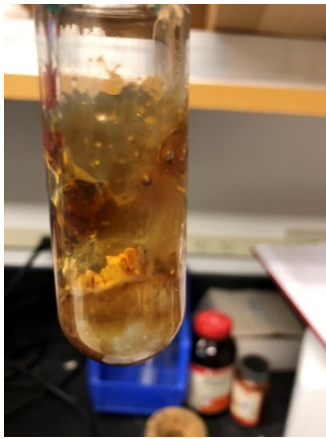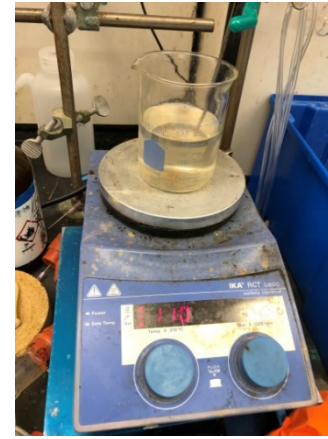

**Left:** ArI. **Center:** After addition of ArI. **Right:** Oil bath preheated to 110 °C.



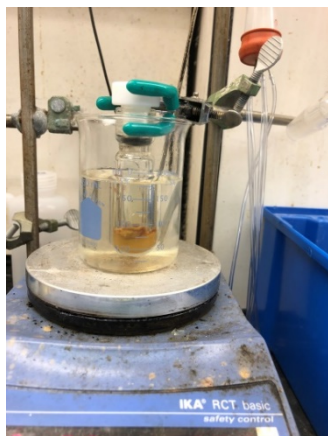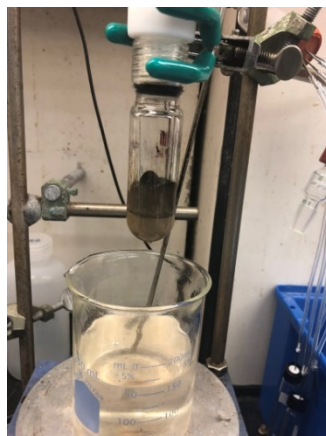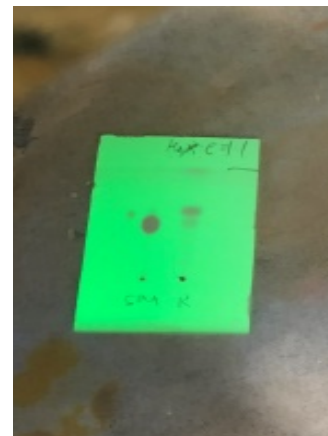

**Left:** Reaction after 10 mins. **Center:** Reaction after 20 hours. **Right:** TLC for starting material (left) and crude reaction mixture (right, top spot is the product).

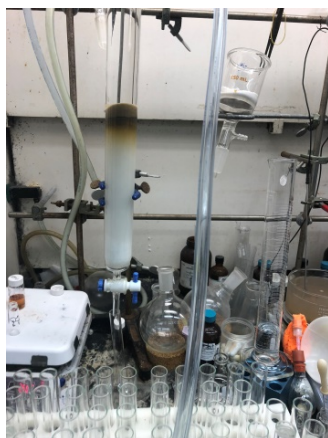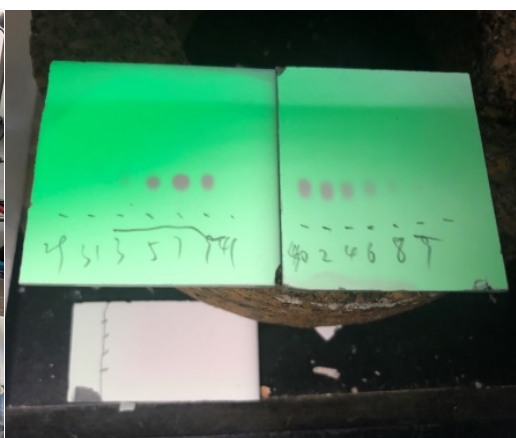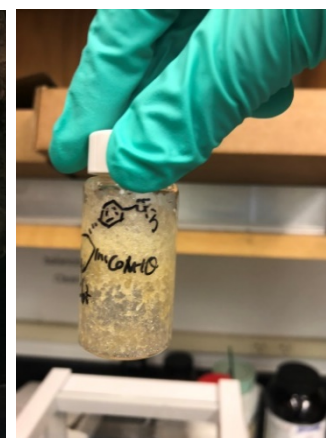

**Left:** Column chromatography. **Center:** TLC of column fractions. **Right:** Final product.

### General Procedure A3.3: *Boc*-protection

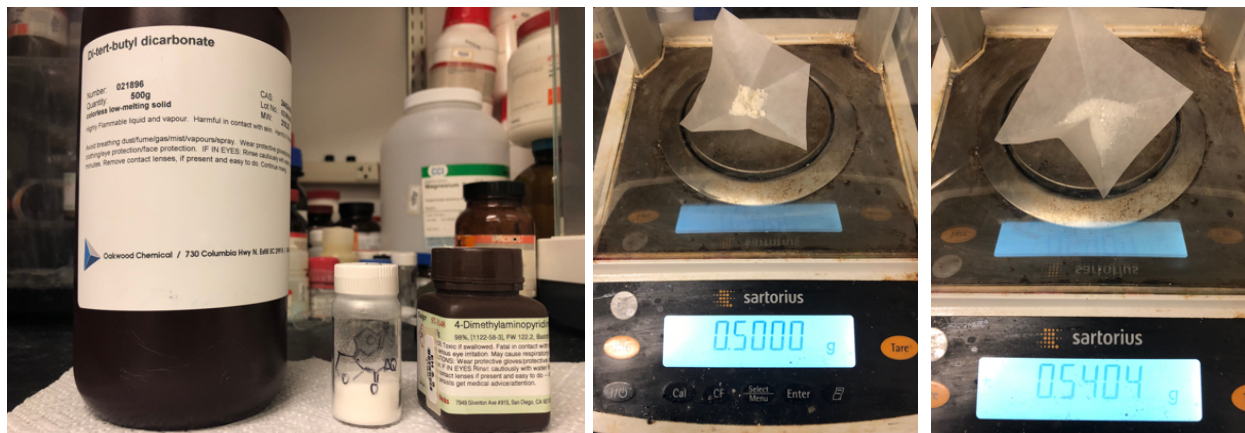

**Left:** Reagents. **Center:** Arylated Product (A3.2). **Right:** DMAP.

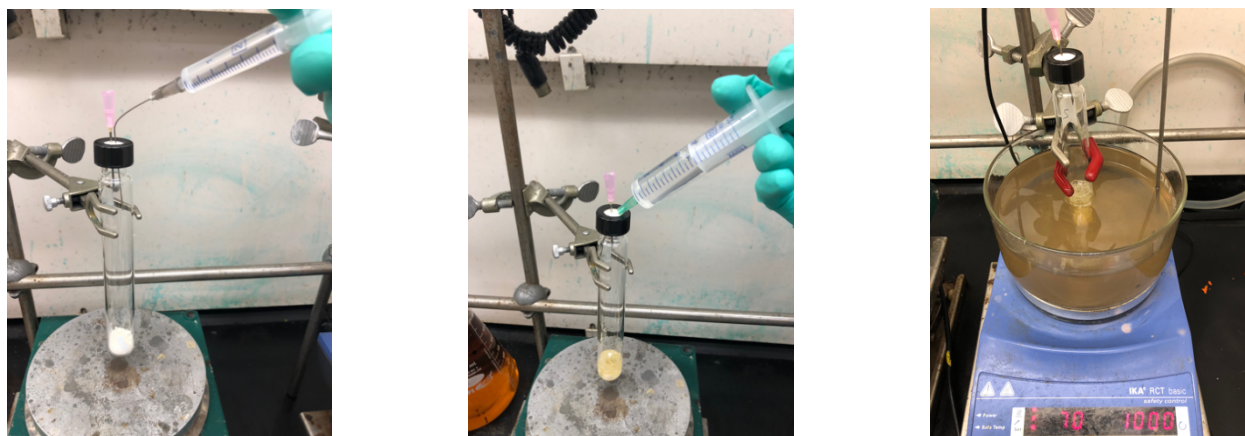

**Left:** Addition of MeCN to the culture tube containing solids. **Center:** Dropwise addition of  $(\text{Boc})_2\text{O}$ . **Right:** Culture tube placed in oil bath at 70 °C.

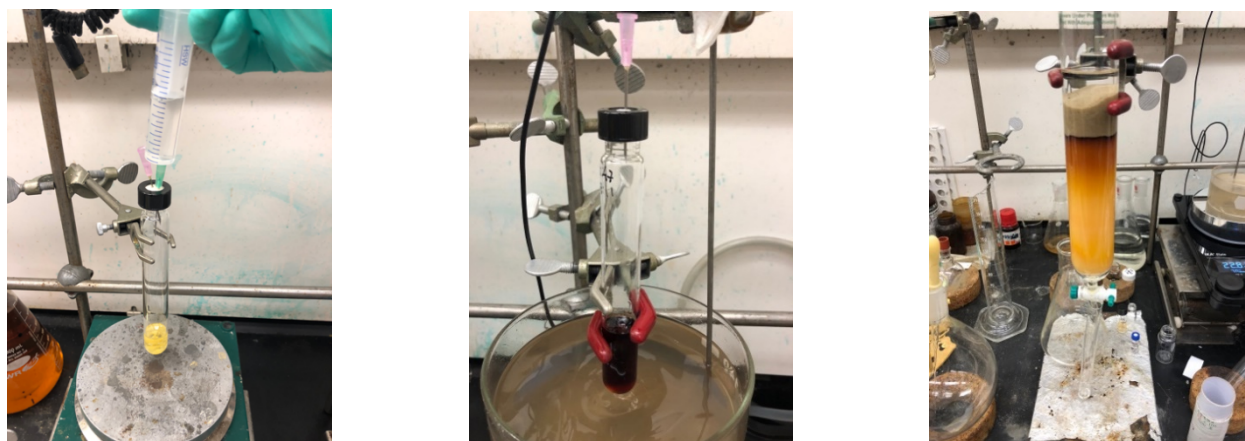

**Left:** Dropwise addition of  $(\text{Boc})_2\text{O}$  after 1 hour. **Center:** After stirring overnight. **Right:** Purification by column chromatography.

### General Procedure A3.3: *Hydrolysis of the Amide Group*

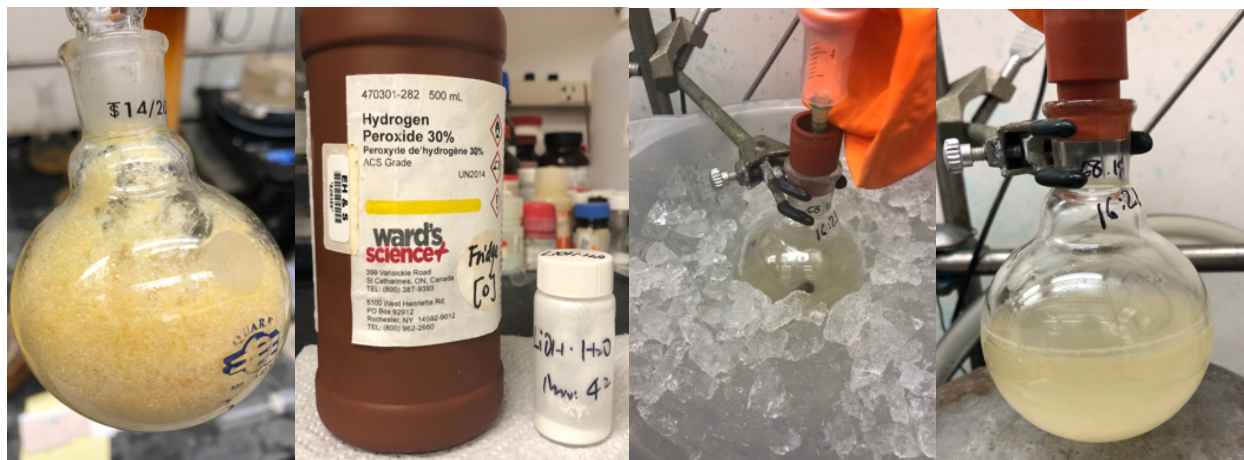

**Left:** Reagents. **Center:** After addition of  $\text{H}_2\text{O}_2$  at  $0\text{ }^\circ\text{C}$ . **Right:** Reaction mixture after 18 hours.

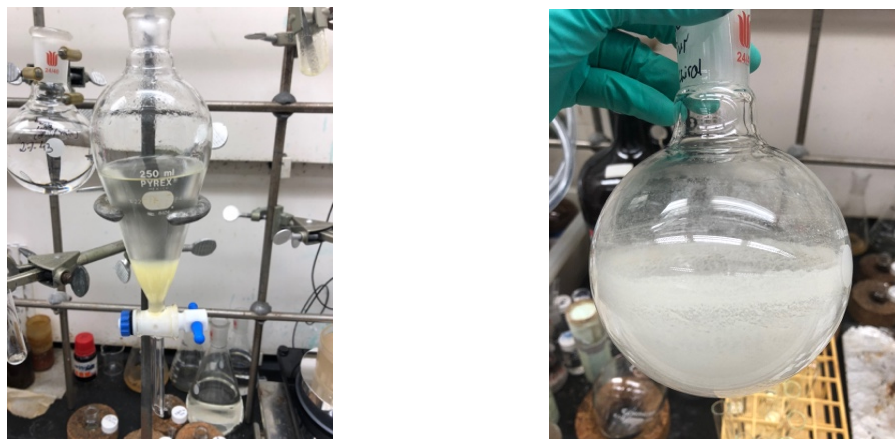

**Left:** Extraction of aqueous phase after acidification with  $\text{HCl}$  1 M. **Right:** Crude product.

## General Procedure A4: sp<sup>3</sup> C–H Methoxylation Sequence for Morpholine Scaffold

### A4.1: Installation of Directing Group

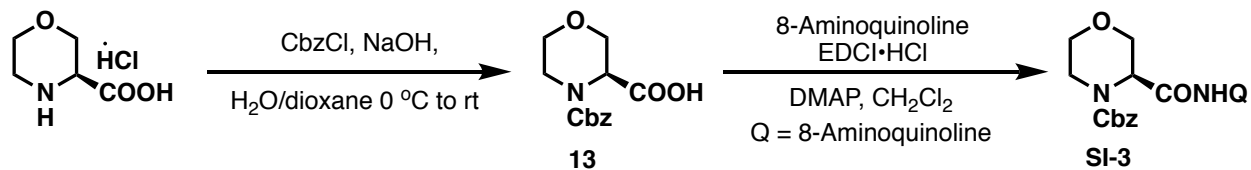

(S)-Morpholine-3-carboxylic acid hydrochloride (1 equiv.) was dissolved in H<sub>2</sub>O:Dioxane (0.16 M, 1:2) then the pH of the solution was adjusted to 11 with 50 wt % aq. NaOH at 0 °C. A solution of CbzCl (3.33 M, 2 equiv.) was then added dropwise while maintain the pH at 11 with 50 wt % aq. NaOH. Then the reaction mixture was stirred at room temperature overnight. After completion, organic impurities were removed by extracting with Et<sub>2</sub>O. The aqueous layer was acidified to pH = 1 with 3 M HCl, then extracted with EtOAc (3x), dried over Na<sub>2</sub>SO<sub>4</sub> and concentrated *in vacuo* to afford the desired product **13**, which was used without further purification.

To a solution of the acid intermediate (1 equiv.) and 8-aminoquinoline (1.1 equiv.) in anhydrous CH<sub>2</sub>Cl<sub>2</sub> (0.1 M) were added EDCI·HCl (1.1 equiv.) and DMAP (0.2 equiv.). The resulting mixture was stirred at room temperature for 36 hours, then quenched with 1 M HCl and diluted with EtOAc. The organic layer was separated, and the aqueous layer was further extracted with EtOAc (3x). The combined organic layers were washed with brine, dried over Na<sub>2</sub>SO<sub>4</sub> and concentrated *in vacuo*. Flash column chromatography (Silica gel, Hexanes:EtOAc) afforded **SI-3**.

#### A4.2: C–H Activation

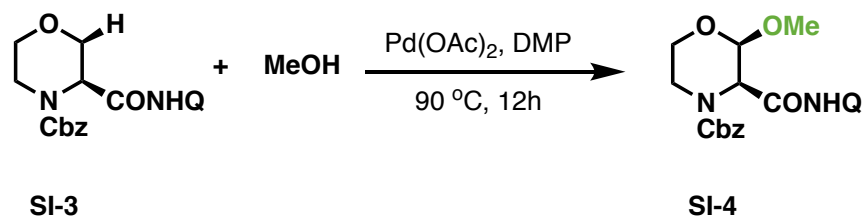

A sealed tube was charged with **SI-3** (1.0 equiv.), Dess–Martin periodinane (3 equiv.), Pd(OAc)<sub>2</sub> (20 mol%) and MeOH (0.33 M). The reaction tube was sealed, then placed in an oil bath preheated to 90 °C for 20 hours. Then the reaction mixture was allowed to cool to room temperature and EtOAc was added. The resulting solution was filtered through a pad of Celite<sup>®</sup>, and further washed with EtOAc (2x). The solvent was removed *in vacuo*, and the crude material was purified by flash column chromatography to afford **SI-4**.

### A4.3: Removal Directing Group and synthesis of RAE

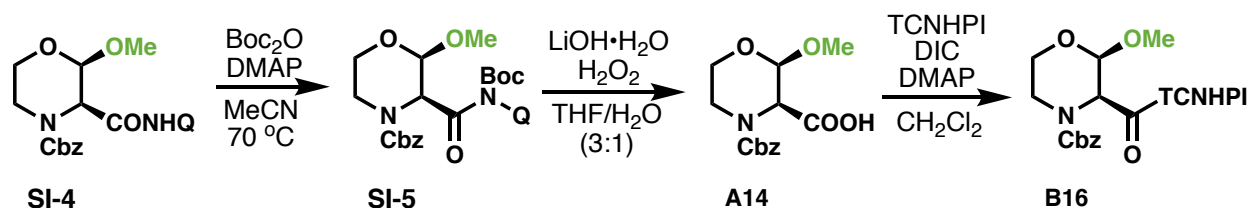

To a solution of compound **SI-4** (1.0 equiv.) and DMAP (3 equiv.) in MeCN (0.08 M) was slowly added (Boc)<sub>2</sub>O (20 equiv.) at room temperature. The reaction mixture was stirred at 70 °C for 6 hours. After cooling to room temperature, the reaction mixture was concentrated *in vacuo*. The residue was purified by flash column chromatography (silica gel, 2:1 Hexanes:EtOAc) to yield compound **SI-5** as a brown oil.

To a solution of compound **SI-5** (1.0 equiv.) in THF:H<sub>2</sub>O (0.08 M, 3:1) were added LiOH·H<sub>2</sub>O (2 equiv.) and 30 % H<sub>2</sub>O<sub>2</sub> (5 equiv.) at 0 °C. The reaction mixture was stirred for 20 minutes at 0 °C, then allowed to warm up to room temperature and stirred for 18 hours. After completion, the reaction was extracted with Et<sub>2</sub>O to remove the organic impurities and then the aqueous layer was acidified with 1 M HCl to PH=6 and extracted with EtOAc (3x). The combined organic layers were washed with brine (3x), dried over Na<sub>2</sub>SO<sub>4</sub> and concentrated *in vacuo* to afford **A14** as a white solid, which was used without further purification.

A round-bottom flask was charged with **A14** (1.0 equiv.), N-hydroxy-tetrachlorophthalimide (1.1 equiv.), and DMAP (0.2 equiv.). CH<sub>2</sub>Cl<sub>2</sub> was added (0.1 M), and the mixture was stirred vigorously. DIC (1.1 equiv.) was then added dropwise via syringe, and the mixture was allowed to stir until the acid was consumed (determined by TLC). The mixture was filtered (over Celite<sup>®</sup>, silica gel, or through a fritted funnel) and rinsed with additional CH<sub>2</sub>Cl<sub>2</sub>. Flash column chromatography (silica gel, 30:1 CH<sub>2</sub>Cl<sub>2</sub>: Et<sub>2</sub>O) afforded the compound **B16** as a white solid.

## Graphical Supporting Information for Morpholine Scaffold (General Procedure A4)

### C-H Activation

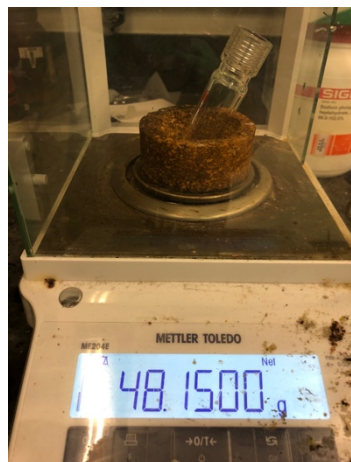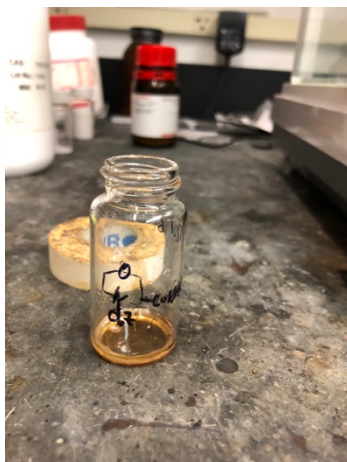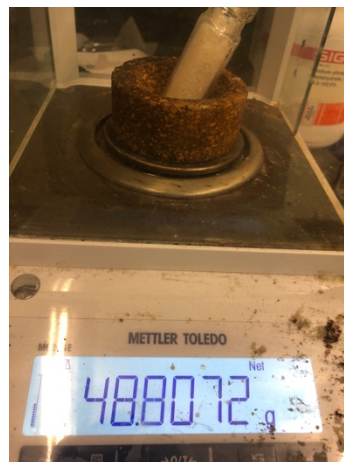

**Left:** Tare of the sealed tube. **Center:** Amide starting material. **Right:** Addition of amide.

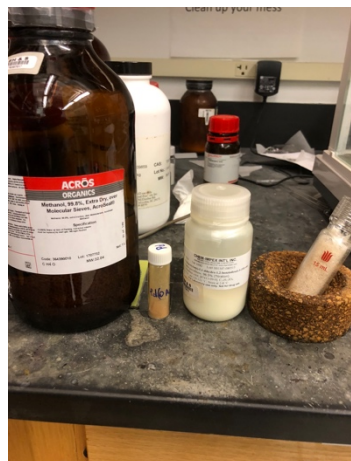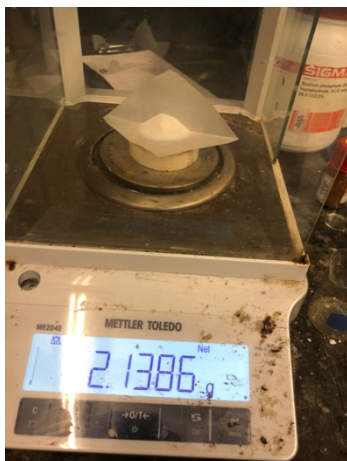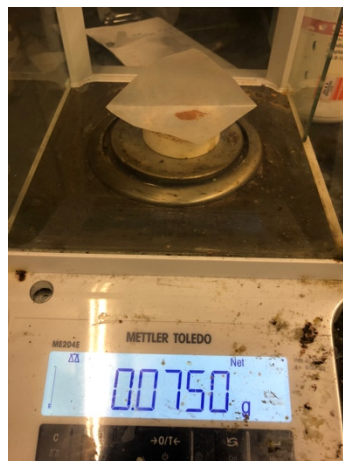

**Left:** Reagents. **Center:** DMP. **Right:** Pd(OAc)<sub>2</sub>.

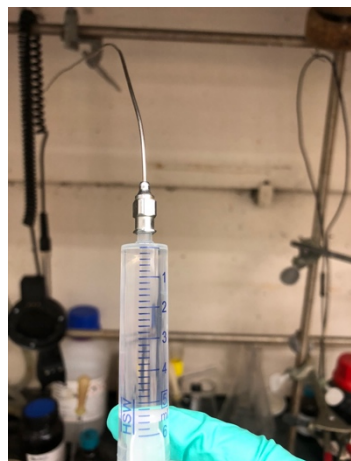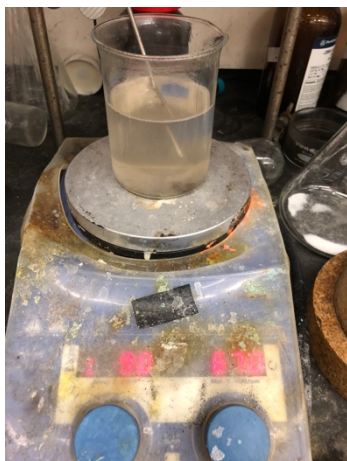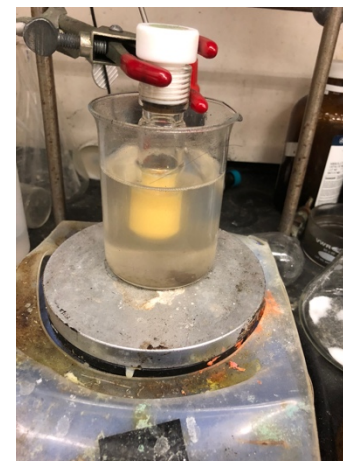

**Left:** MeOH. **Center:** Oil bath preheated to 110 °C. **Right:** Reaction after 5 minutes.

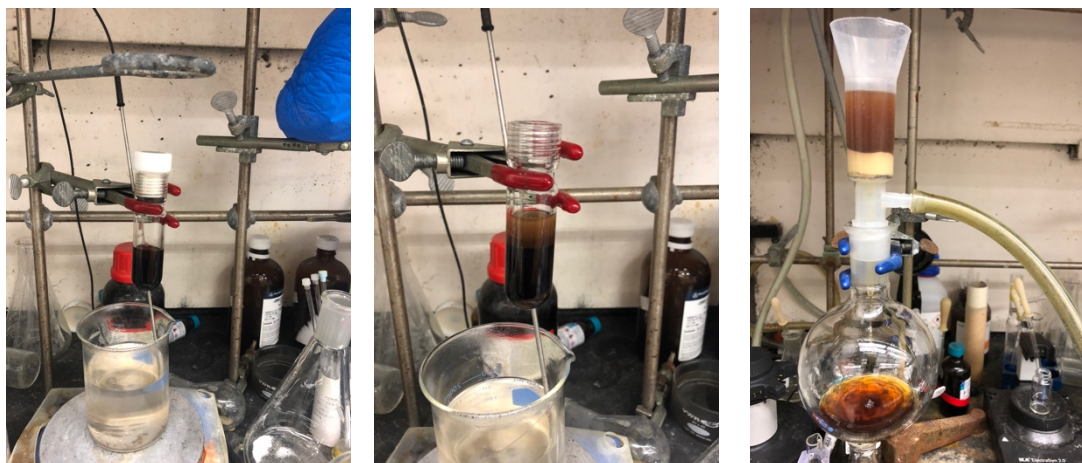

**Left:** Reaction after 12 hours. **Center:** Dilute the reaction with EtOAc (5 mL). **Right:** Filter through a pad of Celite®.

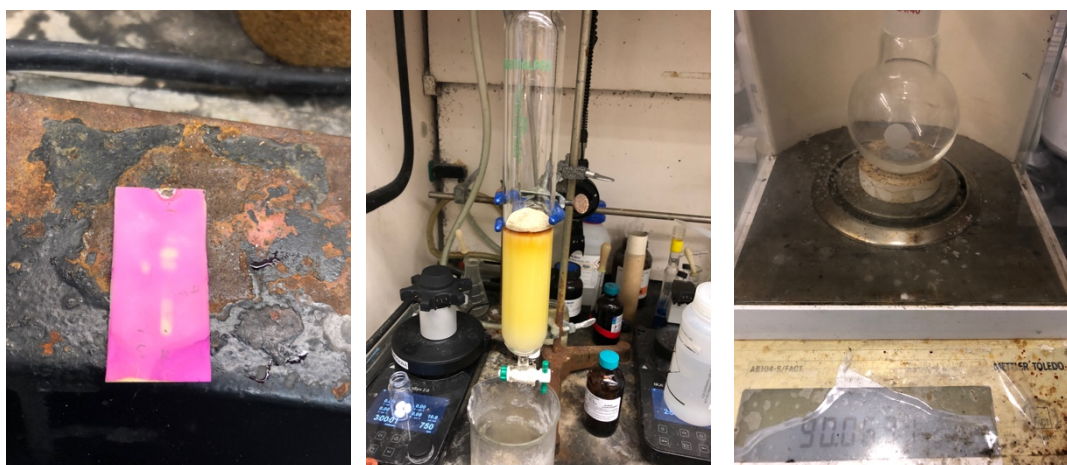

**Left:** TLC for starting material (left) and crude reaction mixture (right, top spot is the product). **Center:** Column chromatography. **Right:** Weight of the empty flask for product.

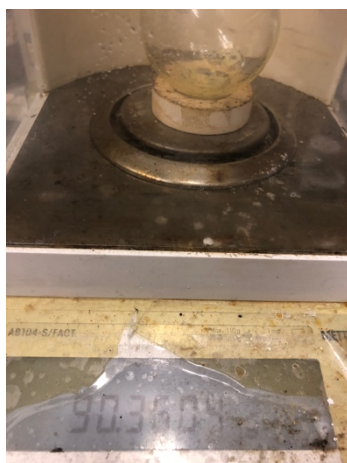

Weight of the flask containing product.



## Removal of Directing Group

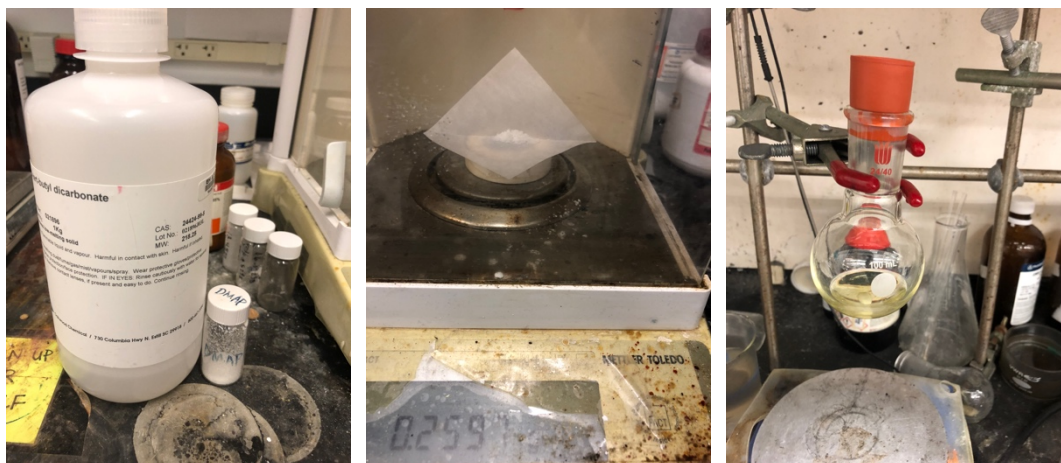

**Left:** Reagents. **Center:** DMAP. **Right:** After adding MeCN (5 mL).

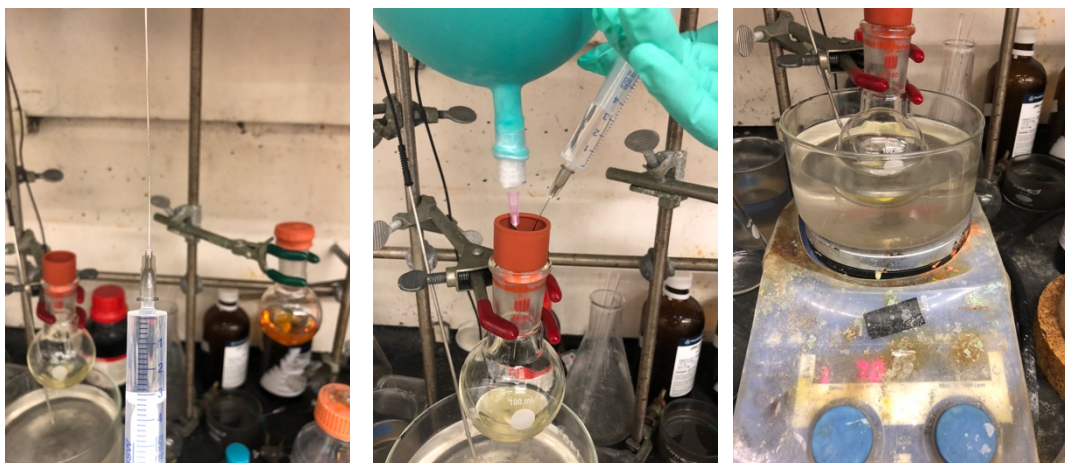

**Left:**  $\text{Boc}_2\text{O}$ . **Center:** Adding  $\text{Boc}_2\text{O}$  slowly. **Right:** Put the flask into a preheated oil bath (70 °C).

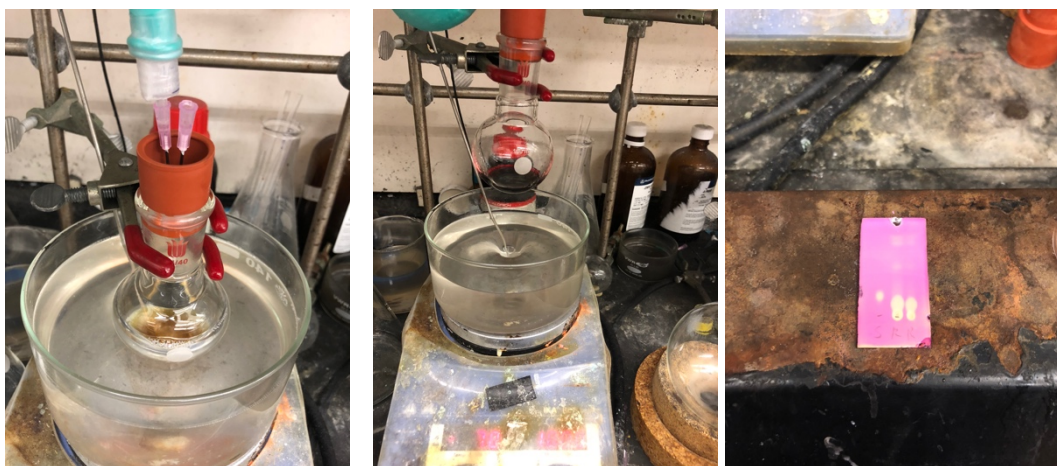

**Left:** Bubbling during the reaction. **Center:** Reaction completed after 6 hours. **Right:** TLC for starting material (left) and crude reaction mixture (right two, bottom spot is the product).

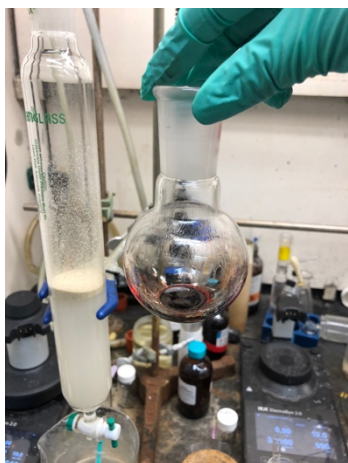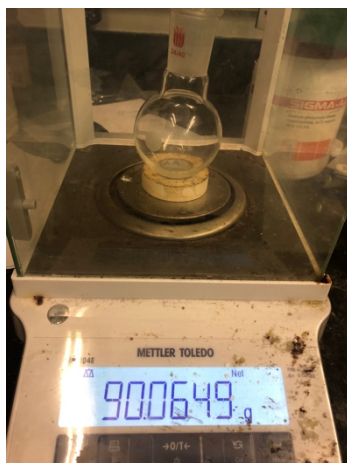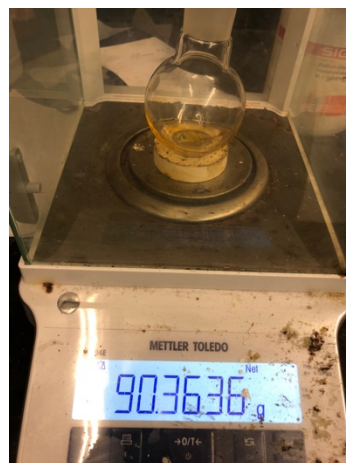

**Left:** Column chromatography. **Center:** Weight of the empty flask for product. **Right:** Weight of the flask containing product.

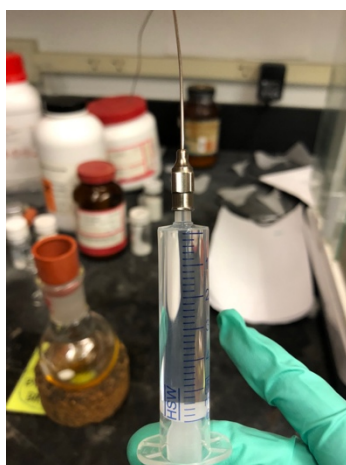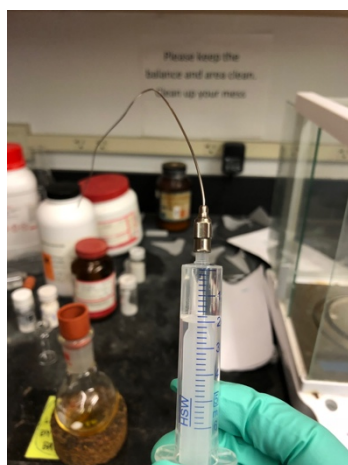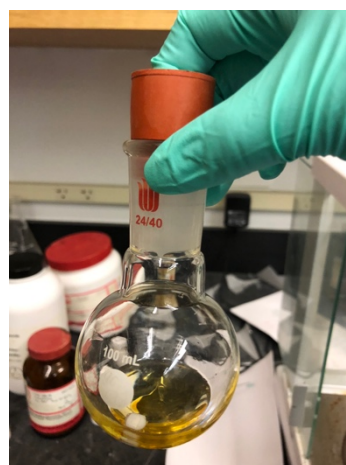

**Left:** THF (6 mL). **Center:** H<sub>2</sub>O (2 mL). **Right:** After adding solvent to the reaction flask.

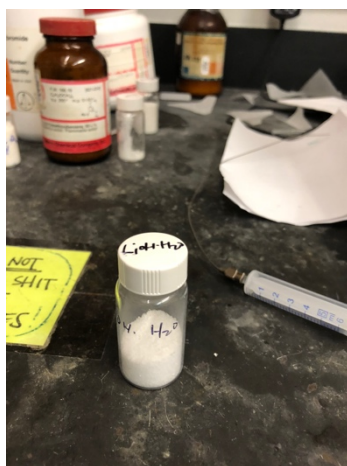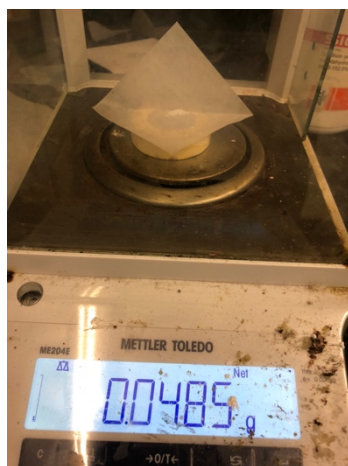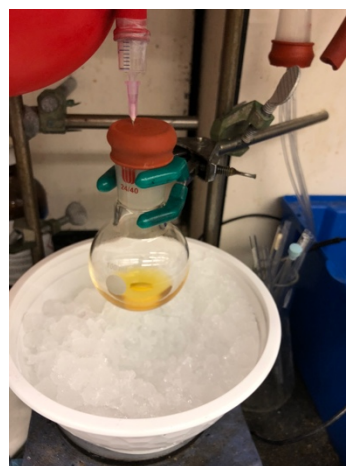

**Left:** LiOH·H<sub>2</sub>O. **Center:** LiOH·H<sub>2</sub>O (48.5 mg). **Right:** After adding LiOH·H<sub>2</sub>O to the flask.

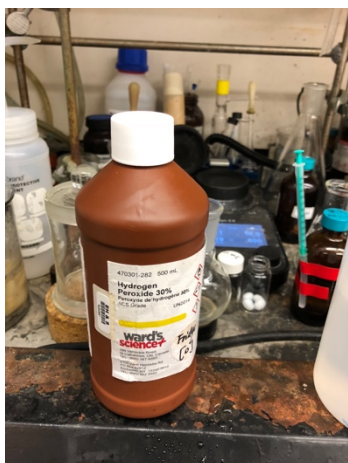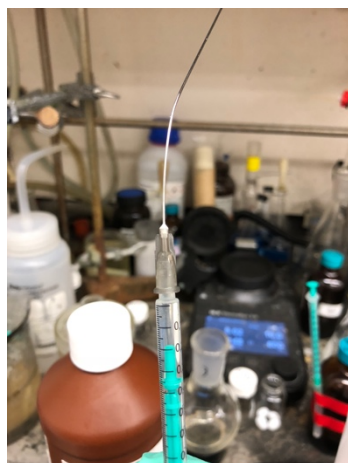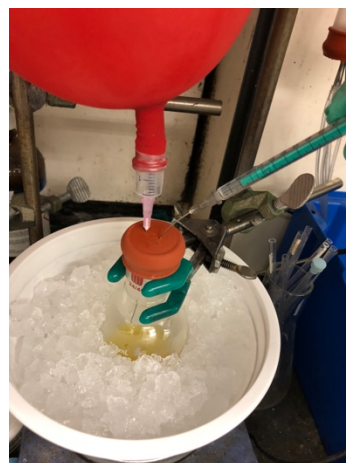

**Left:** H<sub>2</sub>O<sub>2</sub>. **Center:** H<sub>2</sub>O<sub>2</sub> (0.34 mL). **Right:** adding H<sub>2</sub>O<sub>2</sub> dropwise at 0 °C.

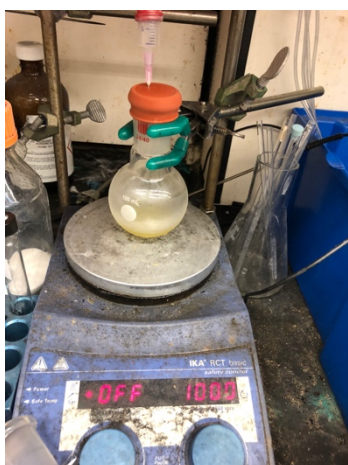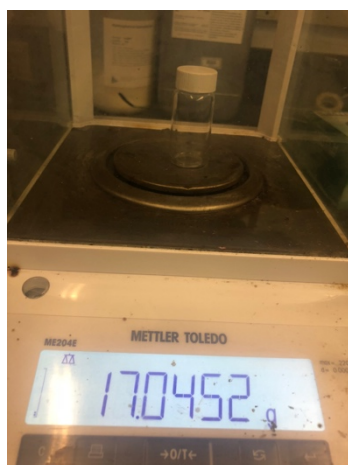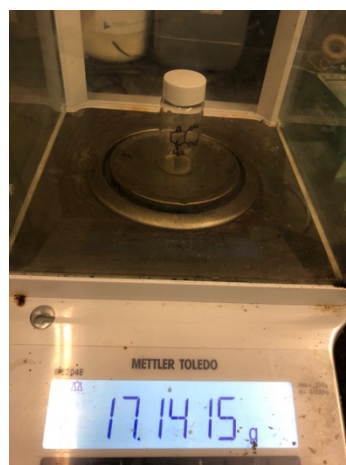

**Left:** Stir at room temperature overnight. **Center:** Weight of the empty flask for product. **Right:** Weight of the flask containing product.

## Preparation of RAE

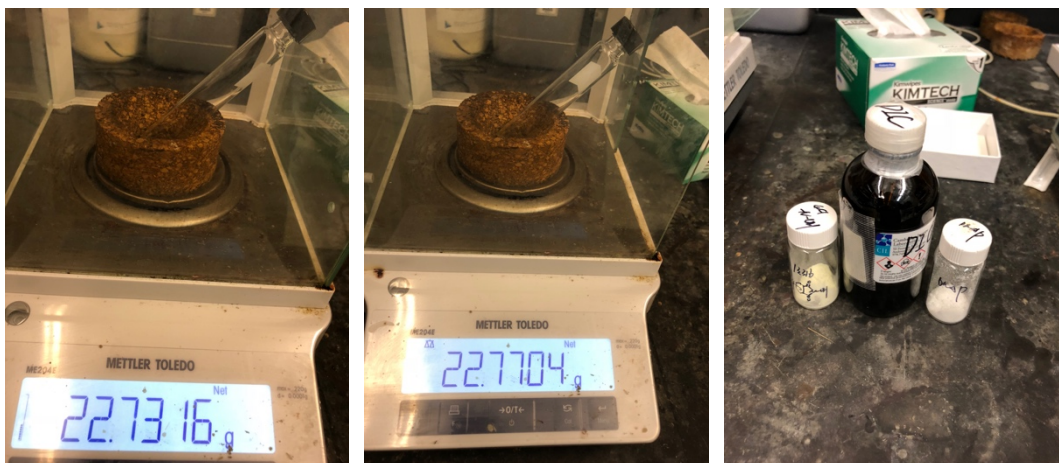

**Left:** Tare of the culture tube. **Center:** Addition of carboxylic acid. **Right:** Reagents.

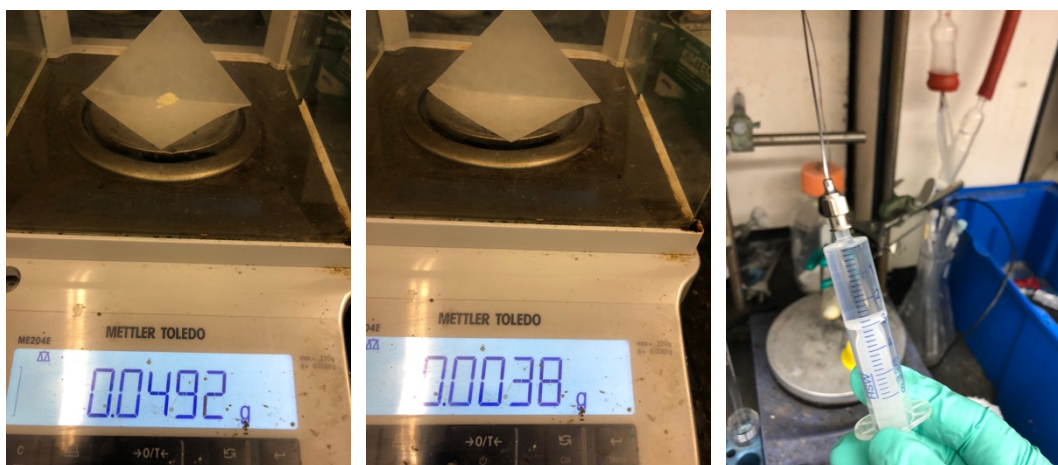

**Left:** TCNHPI. **Center:** DMAP. **Right:** DCM.

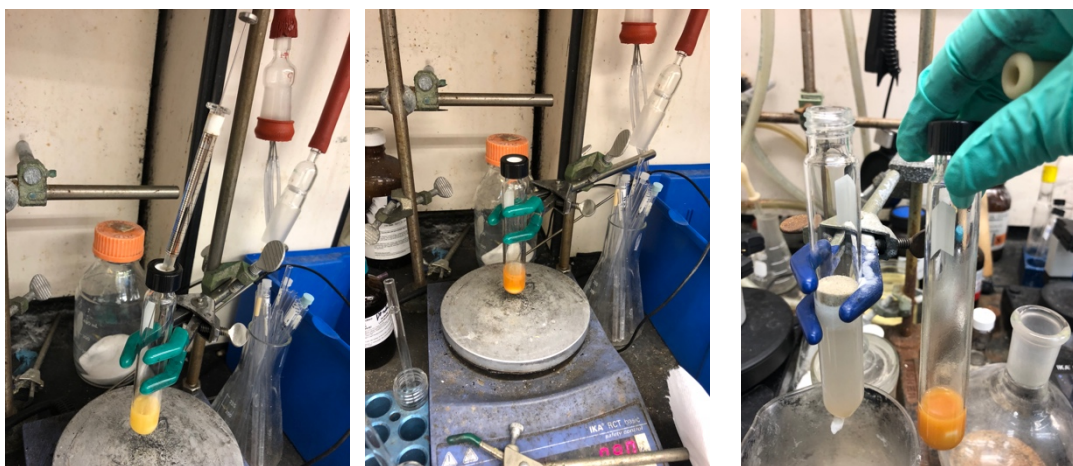

**Left:** Adding DIC. **Center:** stir at room temperature for 2 hours. **Right:** Column chromatography for purification.

**Table S1: Optimization of C–H Methoxylation for Morpholine Scaffold**

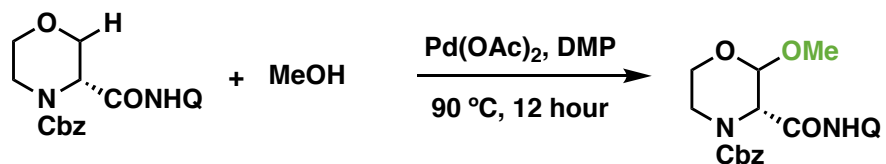

| entry          | Pd(OAc) <sub>2</sub> (mol%) | DMP (eq) | solvent      | yield |
|----------------|-----------------------------|----------|--------------|-------|
| 1              | 10                          | 4        | MeOH         | 57%   |
| 2              | 20                          | 2        | MeOH         | 63%   |
| 3              | 50                          | 2        | MeOH         | 39%   |
| 4 <sup>a</sup> | 10                          | 2        | MeOH         | 50%   |
| 5 <sup>c</sup> | 10                          | 2        | MeOH         | 30%   |
| 6              | 10                          | 2        | MeOH/toluene | 41%   |
| 7              | 10                          | 2        | MeOH/dioxane | 25%   |
| 8              | 10                          | 2        | MeOH/DCE     | 13%   |

**Conditions:** (0.1 mmol), MeOH (1 mL), Pd(OAc) (x mol%), DMP (x equiv), 90 °C, 12h. <sup>b</sup>N<sub>2</sub>, <sup>c</sup>O<sub>2</sub>.

## General Procedure B: Synthesis of Redox-Active Esters

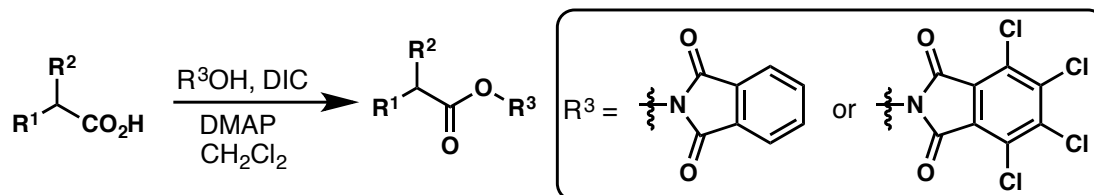

Redox-active esters were prepared according to the previously reported procedure.<sup>6-9,11,13-15</sup>

A round-bottom flask or culture tube was charged with (if solid) carboxylic acid (1.0 equiv.) and N-hydroxytetrachlorophthalimide or N-hydroxyphthalimide (1.0 – 1.1 equiv.).  $CH_2Cl_2$  was added (0.1–0.2 M), and the mixture was stirred vigorously. Carboxylic acid (1.0 equiv.) was added via syringe (if liquid). DIC (1.1 equiv.) was then added dropwise via syringe, and the mixture was allowed to stir until the acid was consumed (determined by TLC). Typical reaction times were between 0.5 and 12 hours. The mixture was filtered (over Celite<sup>®</sup>, Silica gel, or through a fritted funnel) and rinsed with additional  $CH_2Cl_2:Et_2O$ . The solvent was removed *in vacuo*, and purification by column chromatography afforded the desired redox-active ester.

The following redox-active esters were prepared according to **General Procedure B**:

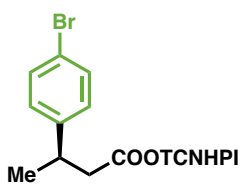

B1

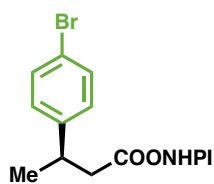

B2

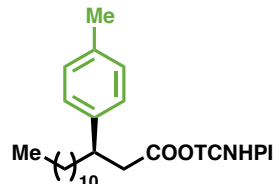

B3

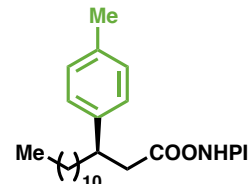

B4

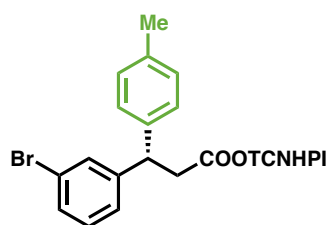

B5

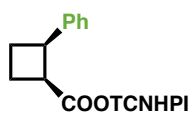

B6

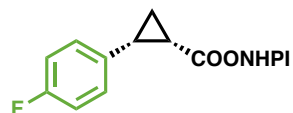

B7

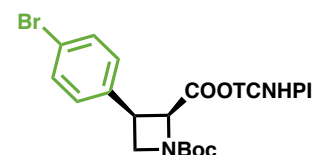

B8

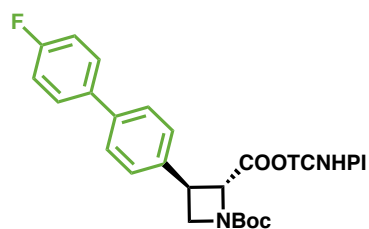

B9

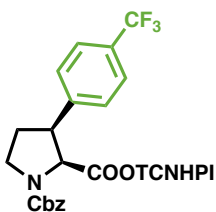

B10

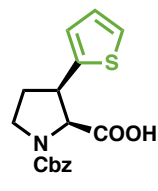

B11

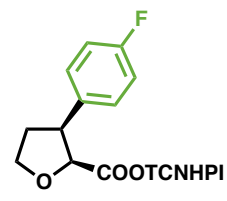

B12

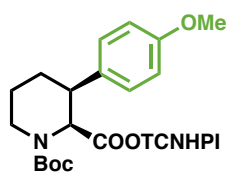

B13

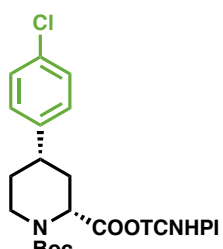

B14

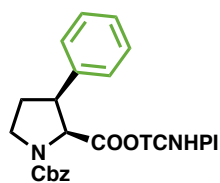

B15

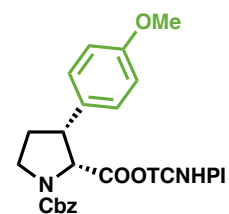

B17

## Photographic Guide for Redox-active Ester Formation (General Procedure B)

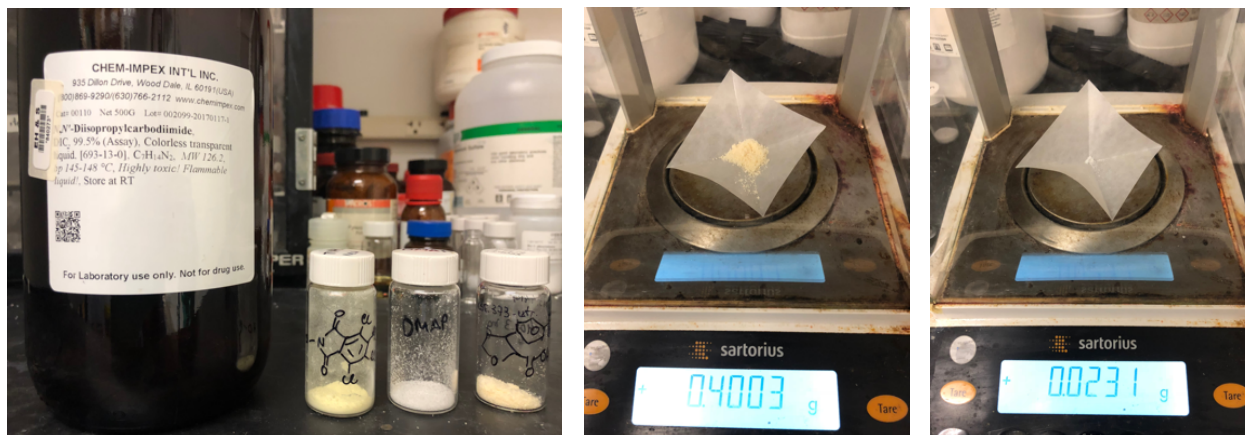

**Left:** Reagents. **Center:** carboxylic acid. **Right:** DMAP.

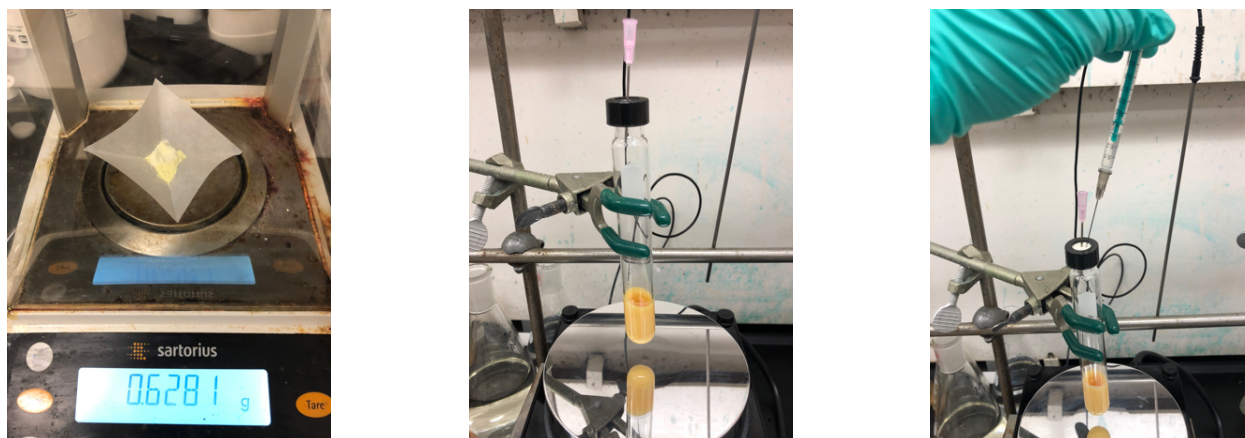

**Left:** Center: Culture tube after addition of  $\text{CH}_2\text{Cl}_2$ . **Right:** Dropwise addition of DIC.

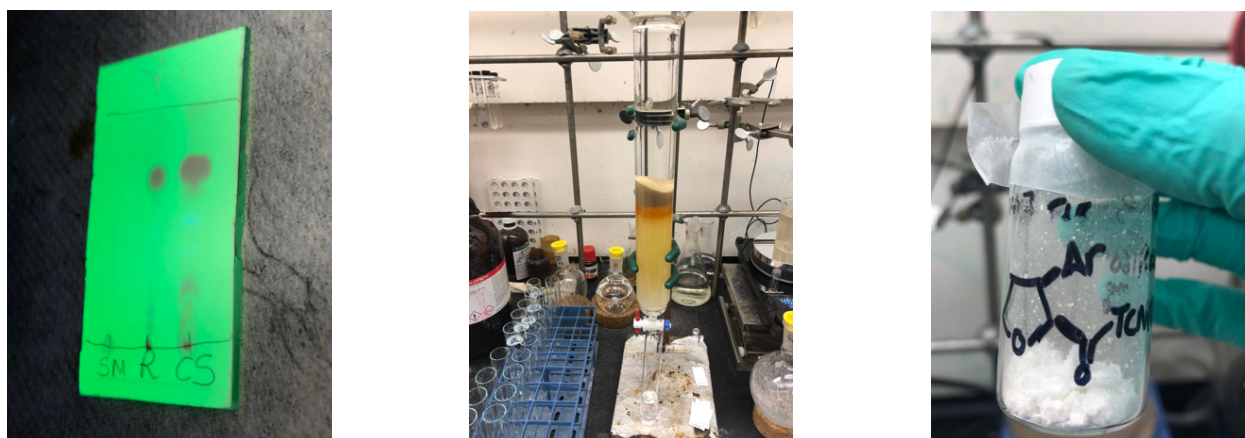

**Left:**

TLC

after 2 hours: (left) carboxylic acid; (center) reaction mixture; (right) co-spot. **Center:** Purification by flash chromatography **Right:** Final RAE.



### **General Procedure C1: Nickel-Catalyzed Boronic Acid Suzuki Cross-Coupling**

The Nickel-catalyzed Suzuki cross-coupling of redox-active esters was performed according to a previously reported procedure.<sup>7</sup>

#### **Preparation of NiCl<sub>2</sub>•6H<sub>2</sub>O/ligand Stock Solution (0.1 M in DMF)**

A culture tube was charged with NiCl<sub>2</sub>•6H<sub>2</sub>O (1 equiv.) and Bathophenanthroline (BPhen - **L6**) (1 equiv). The tube was then evacuated and backfilled with argon from a balloon 3 times. DMF (6.0 mL) was added and the resulting mixture was stirred at room temperature for at least 1 hour to give a homogeneous green solution.

## Graphical Supporting Information for Preparation of $\text{NiCl}_2 \cdot 6\text{H}_2\text{O}$ /Bathophenanthroline

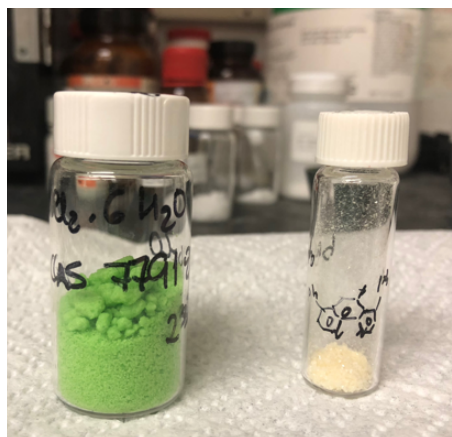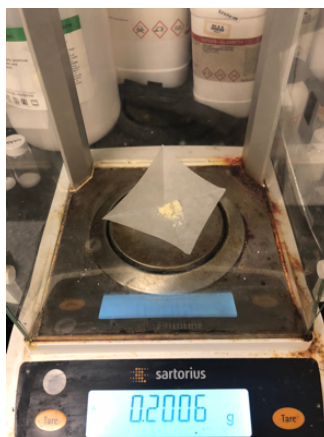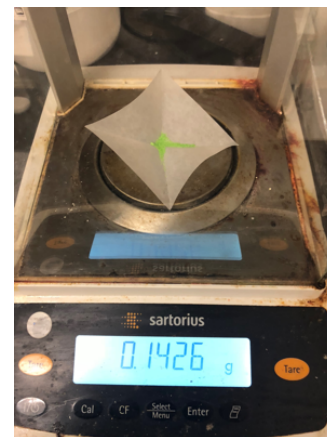

**Left:** Reagents. **Center:** Bathophenanthroline. **Right:**  $\text{NiCl}_2 \cdot 6\text{H}_2\text{O}$ .

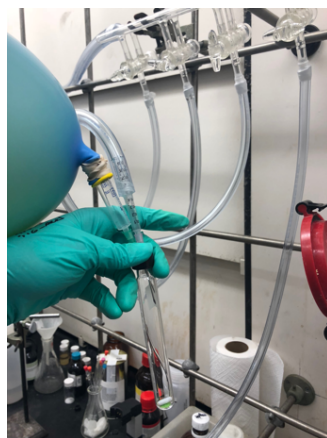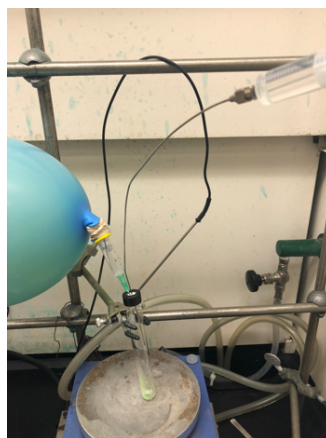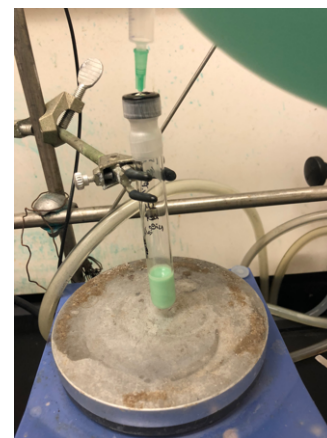

**Left:** Culture tube containing solids being evacuated and backfilled with Argon (3x). **Center:** Addition Dioxane. **Right:** Stock solution after 3 hours.

## Procedure for the Suzuki Ni-Catalyzed Decarboxylative Cross-Coupling

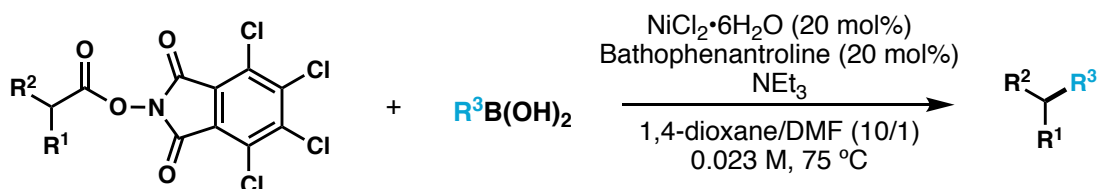

A culture tube was charged with TCNHPI RAE (1.0 equiv.), boronic acid (3.0 equiv.) and a stir bar. The tube was then evacuated and backfilled with argon from a balloon. This process was repeated for three times in total. 1,4-Dioxane (0.025 M) was added and the resulting mixture was stirred for 1 minute before  $\text{NEt}_3$  (10.0 equiv.) was added. The mixture was stirred for 2–5 minutes until becoming homogeneous. Then, a solution of  $\text{NiCl}_2 \cdot 6\text{H}_2\text{O}$ /Bathophenanthroline (0.05 M in DMF, 20 mol%) was added and the tube was immediately placed in a preheated 75 °C oil bath for 12 hours under stirring. *NOTE: It is very important that the entirety of the reaction mixture is submerged in the heated oil bath to ensure the success and reproducibility of the reaction.* After 12 hours, the reaction mixture was allowed to cool to room temperature. The mixture was then diluted with  $\text{Et}_2\text{O}$  or  $\text{EtOAc}$ , washed with 0.1 M  $\text{HCl}$  (sat. aq.  $\text{NH}_4\text{Cl}$  for acid-sensitive substrates), water and brine successively. The organic layer was dried over  $\text{Na}_2\text{SO}_4$  and concentrated *in vacuo*. The crude product was purified by Silica gel flash column chromatography or preparative TLC (pTLC) to yield the pure compound.

The following boronic acids were used following **General Procedure C1**:

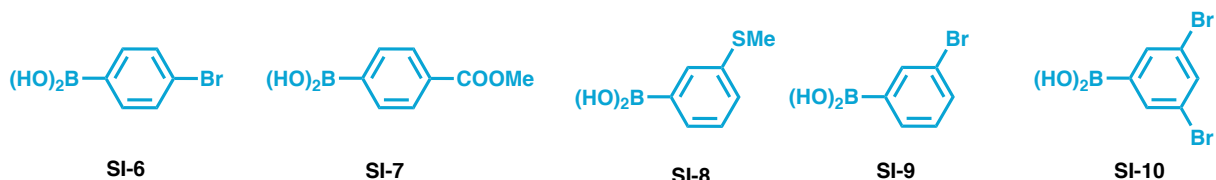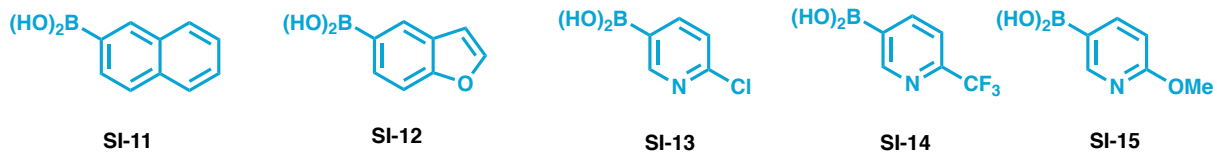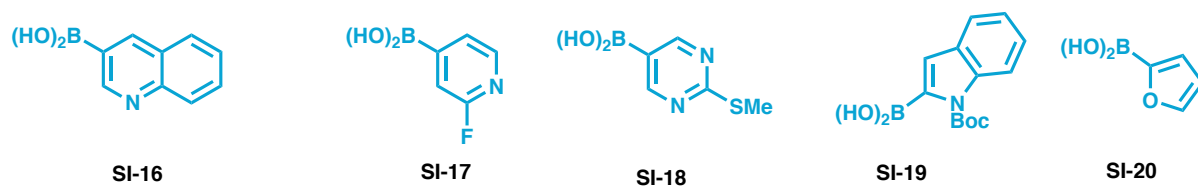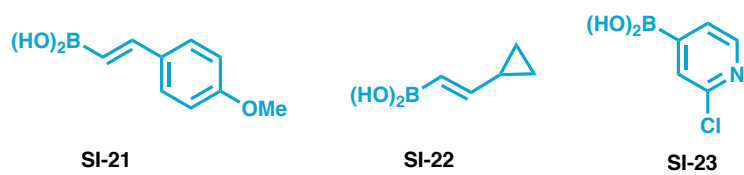

## Graphical Supporting Information for Suzuki type reaction

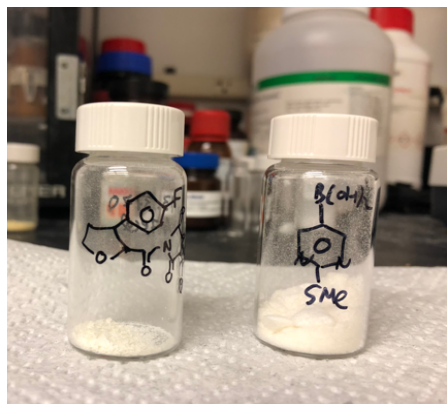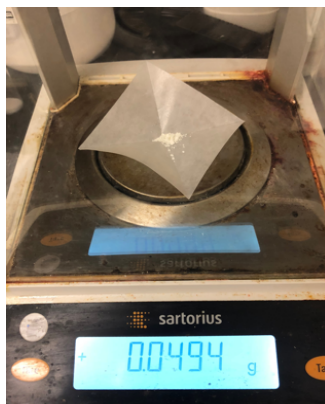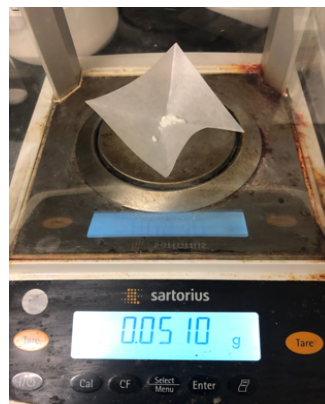

**Left:** Reagents. **Center:** RAE. **Right:** Boronic acid.

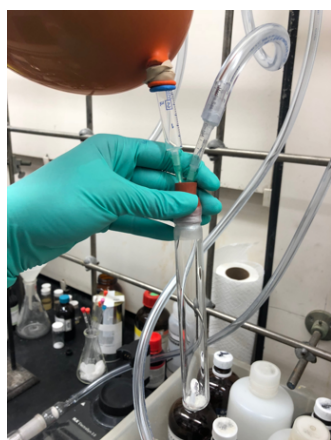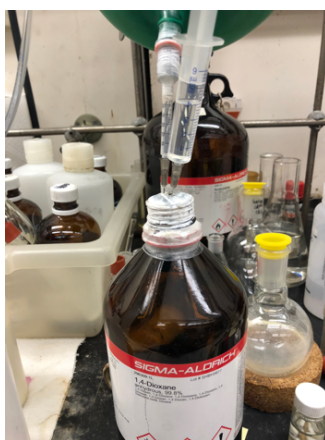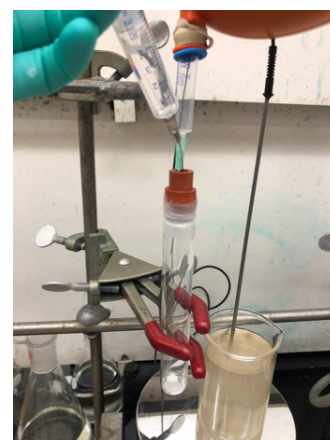

**Left:** Culture tube containing solids evacuated and backfilled with Argon (3x). **Center:** Dioxane (4 mL). **Right:** Addition Dioxane.

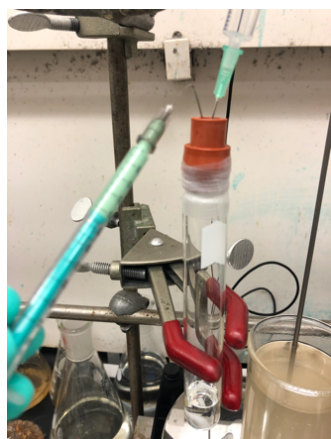

**Left:**

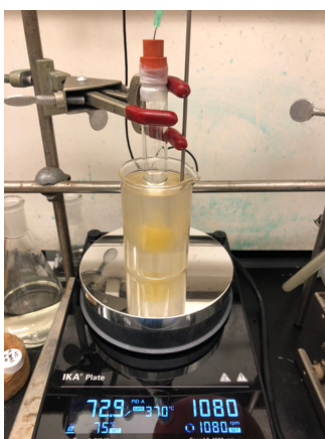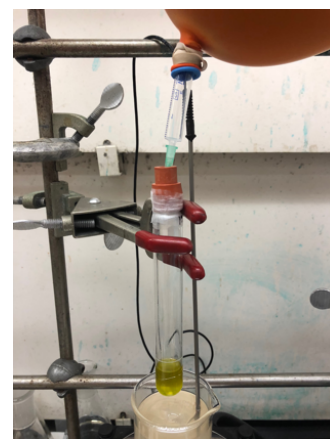

Addition of catalyst stock solution. **Center:** The culture tube placed at 75 °C. **Right:** The reaction mixture after 12 hours.

## General Procedure C2: Nickel-catalyzed Negishi Alkylation

The Nickel-catalyzed Negishi alkylation of redox-active esters was performed according to the previously reported procedure.<sup>8</sup> Please see this reference for graphical supporting information.

### Preparation of Alkyl Zinc Reagents from Alkyl Bromides

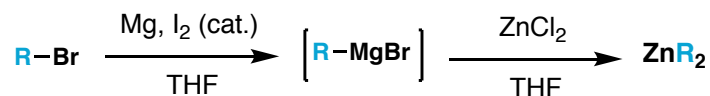

Two round bottom flasks were flame-dried and allowed to cool under vacuum. Both flasks were then backfilled with argon from a balloon. One flask was charged with Mg turnings (1.5 equiv.) and I<sub>2</sub> (0.01 equiv.). In the other flame-dried flask, alkyl bromide (1.0 equiv) was dissolved in anhydrous THF to make a 0.5 M solution of the alkyl bromide in THF. A small portion of the alkyl bromide solution was added to the Mg and I<sub>2</sub>, and the mixture was stirred. The flask was heated gently with a heat gun until the dark brown color disappeared. The rest of the alkyl bromide solution was added dropwise while the flask was heated with a heat gun. After 1 hour, the resulting solution of Grignard reagent was titrated with I<sub>2</sub> to afford Grignard reagents with titration typically ranging 0.3–0.44 M in THF. To a separate flame-dried round-bottom flask, ZnCl<sub>2</sub> (1.0 M in THF, 1 equiv.) was added. A portion of the solution of alkyl Grignard reagent (2 equiv.) was added dropwise to the ZnCl<sub>2</sub> solution, and the mixture was stirred for at least 10 min before use. The yield was assumed to be quantitative for this step. On 0.1 mmol scale, the volume of dialkylzinc reagent solution used for the reaction was typically between 1.2–1.5 mL (corresponding to 0.2 mmol of dialkylzinc reagent).

## Procedure for the Ni-catalyzed Decarboxylative Alkylation

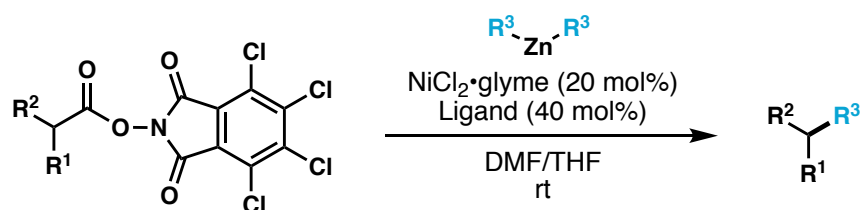

A culture tube was charged with redox-active ester (1.0 equiv.). The tube was then evacuated and backfilled with argon from a balloon. A solution of  $NiCl_2 \cdot glyme$  (0.2 equiv.) and ligand 2,2'-bipyridine (Bipy -**L7**) or 4,4'-di-tert-butylbipyridine (di<sup>t</sup>BuBipy -**L5**) (0.4 equiv.) in DMF (0.05 M) was added. The mixture was stirred for 5 minutes. A solution of dialkylzinc (2.0 equiv.) in THF was added. The argon balloon was removed, and the culture tube was sealed with Teflon™ tape and electrical tape. The resulting mixture was allowed to stir overnight (8–16 hours) at room temperature. The reaction mixture was quenched with 1 M HCl (or half-saturated aqueous  $NH_4Cl$  solution for acid sensitive substrates) and extracted with  $Et_2O$  or EtOAc. The organic layer was washed with water and brine and dried over  $MgSO_4$ . The organic layer was concentrated *in vacuo*. The crude product was purified by Silica gel flash column chromatography or preparative TLC (pTLC) to yield the pure compound.

The following alkylzinc reagents were used according to **General Procedure C2**:

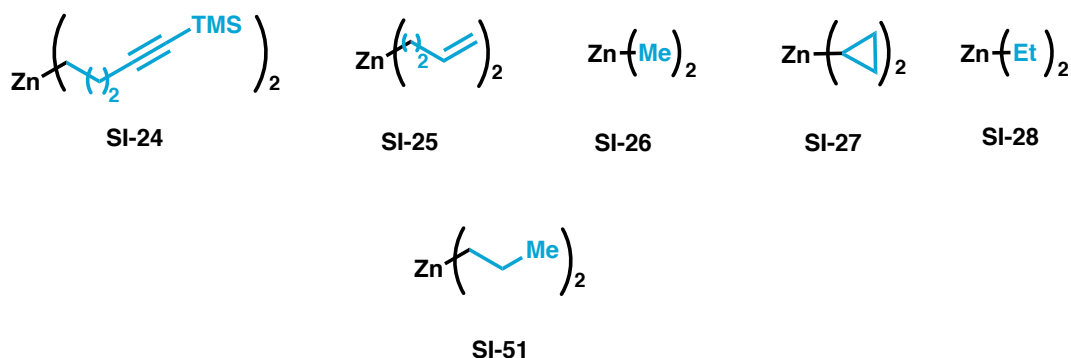

### General Procedure C3: Nickel-catalyzed Negishi Alkenylation

The Nickel-catalyzed Negishi alkenylation of redox-active esters was performed according to the previously reported procedure.<sup>9</sup> Please see this reference for graphical supporting information.

### Synthesis of Alkenylzinc Reagents from Alkenyl Grignard Reagents

*From commercial Grignard reagents (5 mmol scale)*

The following Grignard reagent was purchased as solutions in THF from Sigma-Aldrich.

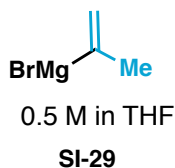

ZnCl<sub>2</sub> (1.0 equiv.) and LiCl (1.25 equiv.) were flame-dried under vacuum. Upon cooling, the flask was placed under argon atmosphere. Anhydrous THF (1 M) was added, and the mixture was stirred vigorously and gently heated with a heat gun until all ZnCl<sub>2</sub> and LiCl dissolved. At this time, commercial alkenyl Grignard reagent (1.0 equiv.) was added slowly via syringe to the ZnCl<sub>2</sub> and LiCl solution. Upon complete addition, the mixture was stirred for at least 15 minutes before use. The transmetalation was assumed to occur in quantitative yield.

### *Synthesis of Alkenylzinc Reagents from $\alpha,\beta$ -Unsaturated Alkenyl Bromide or Iodide*

The following procedure was developed based on that of Knochel and coworkers.<sup>10</sup> A flask was charged with LiCl (2.0 equiv.) and Zn dust (2.0 equiv.). The flask was placed under vacuum and gently dried with a heat gun. Upon cooling, the flask was placed under argon atmosphere. THF (1 M) was added, and the mixture was stirred vigorously. TMSCl (0.05 equiv.) was added dropwise, and the mixture was heated to reflux with a heat gun. The mixture was then allowed to cool to room temperature, 1,2-dibromoethane (0.05 equiv.) was added dropwise, and the mixture was heated to reflux with a heat gun. Upon cooling, the flask was placed in a room temperature water bath. Next, if using an  $\alpha,\beta$ -unsaturated alkenyl iodide the substrate (1.0 equiv.) was added dropwise. If using an  $\alpha,\beta$ -unsaturated alkenyl bromide, the substrate was added in one portion via syringe. The mixture was then stirred at ambient temperature for 1 hour resulting in a green or red colored solution. *Note:* If the color does not change within 5–10 minutes, it is likely that the zinc insertion reaction did not proceed. If this is the case, gently heat the reaction mixture with a heat gun. For future reactions, consider activating the Zn dust by washing with 1 M HCl, rinsing the Zn with water, *i*PrOH, MeOH, and Et<sub>2</sub>O, and drying under vacuum. At this time, stirring was



stopped and the remaining zinc was allowed to settle to the bottom of the flask. The concentration was determined by titration with I<sub>2</sub>.

*Note:* For some  $\alpha,\beta$ -unsaturated alkenyl zinc reagents, the titration equivalence point is difficult to determine due to the color of the zinc reagent. In these cases, the equivalence point can either be approximated (it is possible to see the consumption of some I<sub>2</sub>) or determined by quantitative <sup>1</sup>H NMR or GC/FID analysis. During the course of zinc insertion, small amounts of isomerization were noted for the zinc reagent derived from **SI-30**. Depending on the batch, typically the isomerization was from 0 to 10% to the undesired olefin isomer. We recommend working up the titrated organozinc solution and analyzing the crude product by <sup>1</sup>H NMR spectroscopy to determine the isomeric ratio of the organozinc reagent (as the vinyl iodide). Therefore, depending on the quality of the organozinc reagent, 0 to 10% of the undesired isomer was obtained as the coupling product. Only the isolated yields for substrates from **SI-30** have been reported; the cross-coupling of the undesired isomer was not included in the yield. For all cases in this work, small amounts of the undesired isomer could be separated by flash column chromatography.

The following  $\alpha,\beta$ -unsaturated alkenyl halide was used according to a previously reported procedure.<sup>9</sup>

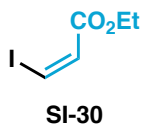

## Procedure for the Ni-catalyzed Decarboxylative Alkenylation

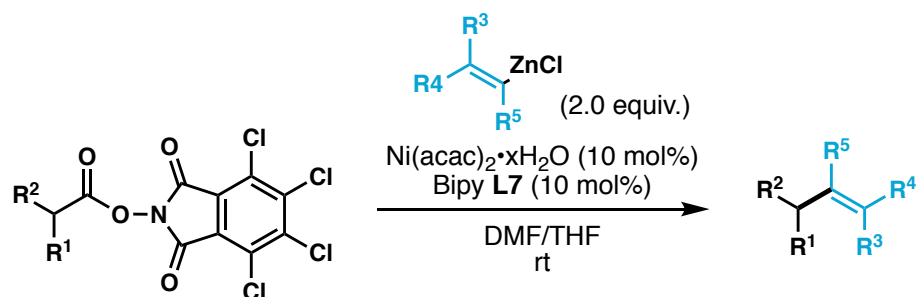

TCNHPI redox-active ester (1.0 equiv.) was added to a culture tube, which was sealed with a Teflon<sup>®</sup>-septum cap and wrapped in Parafilm<sup>®</sup>. The culture tube was evacuated and refilled with Argon three times. A solution of Ni(acac)<sub>2</sub>·xH<sub>2</sub>O (0.1 equiv.) and Bipy L7 (0.1 equiv.) in DMF (0.1 M relative to substrate) was added to the tube, and the mixture was vigorously stirred. A solution of alkenylzinc reagent (2.0 equiv.) in THF was then added, and the mixture was allowed to stir at room temperature overnight (6–12 h) or until all starting material was consumed as determined by TLC analysis. The reaction mixture was then diluted with EtOAc or Et<sub>2</sub>O, quenched with 1M HCl, and extracted. Organic layers were dried over MgSO<sub>4</sub>, filtered and concentrated to afford the crude product, which was purified by preparative TLC (pTLC) or column chromatography.

For alkenylzinc reagent prepared from **SI-30**, MgBr<sub>2</sub>·OEt<sub>2</sub> was added in stoichiometric amount relative to the alkenylzinc, and the addition of catalyst solution to culture tube was at 0 °C using ice/water bath.

The following alkylzinc reagents were used following **General Procedure C3**:

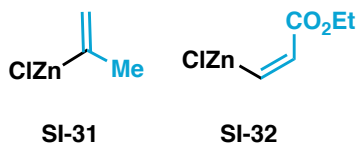

### General Procedure C4: Nickel-catalyzed Negishi Arylation

The Nickel-catalyzed Negishi arylation of redox-active esters was conducted according to a previously reported procedure.<sup>11</sup> Please see this reference for graphical supporting information.

#### Preparation of ZnCl<sub>2</sub> Solution (1.0 M in THF)

A Schlenk flask equipped with stir bar was flame-dried and allowed to cool to room temperature under vacuum. The flask was backfilled with nitrogen, and ZnCl<sub>2</sub> (1 equiv.) was added. The flask was placed under vacuum and heated in an oil-bath preheated to 150 °C. After stirring for 2–12 hours, the flask was removed from the oil bath and allowed to cool to room temperature. The flask was backfilled with nitrogen, and THF (1 M) was added. The mixture was vigorously stirred until all ZnCl<sub>2</sub> was dissolved (approximately 12 hours). However, if necessary, the solution can be used before all solids have completely dissolved without a decrease in yield of the subsequent reaction.

#### Preparation of the Arylzinc Reagents

Phenyl Zinc reagent was prepared according **General Procedure C4**, from the commercially available phenylmagnesiumgrignard reagent purchased as solutions in THF from Sigma-Aldrich.

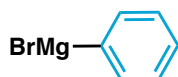

1 M in THF

**SI-33**

Arylzinc reagent **SI-36** was prepared from **SI-34** by a method developed by Knochel.<sup>12</sup> To an oven-dried culture tube backfilled with argon (3x) was added **SI-34** (1 equiv.) and THF (0.3 M). Then a solution of *i*PrMgBr•LiCl (1.3 M in THF, 1 equiv.) was added dropwise at –60 °C. After stirring for 30 minutes, iodo-lithium exchange was completed (as determined by quenching an aliquot with water and confirming the disappearance of the aryl iodide by <sup>1</sup>H NMR). Then, a ZnCl<sub>2</sub> solution (1.0 M in THF, 1 equiv.) was added to the mixture at –60 °C. After stirring for 10 minutes at –60 °C, the culture tube was put into an ice bath. The solution of ArZnCl•LiCl was stirred until it became clear and was titrated with I<sub>2</sub> before being used for the coupling reaction.

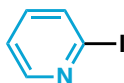

**SI-34**

### Titration of Arylzinc Reagents

LiCl (5 equiv.) was added to a septum-containing screw-capped culture tube equipped with a stir bar. The culture tube was flame-dried under vacuum and cooled under flow of argon from a balloon. The cap was removed, I<sub>2</sub> (1.0 equiv.) was quickly added to the culture tube, and the cap was replaced. The exact amount of I<sub>2</sub> added was recorded. Anhydrous THF (0.1 M) was added, and the mixture was stirred for 5 minutes to afford a dark brown solution. A 1.00 mL syringe was filled with approximately 0.90 mL of ArZnCl•LiCl, and the solution was added dropwise via the syringe. The exact volume of ArZnCl•LiCl solution in the syringe was recorded (titration start point). Over the course of the titration the color changes from dark brown to light brown to yellow to colorless, indicating complete consumption of I<sub>2</sub>, and upon consumption of I<sub>2</sub>, the titration end point was recorded. The concentration of the ArZnCl•LiCl solution was then calculated. Typical concentrations of arylzinc reagents ranged from 0.18 M to 0.24 M in THF.

The following arylzinc reagents were used according to **General Procedure C4**:

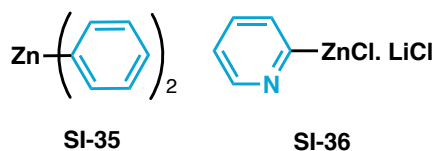

### Procedure for the Ni-catalyzed Decarboxylative Arylation

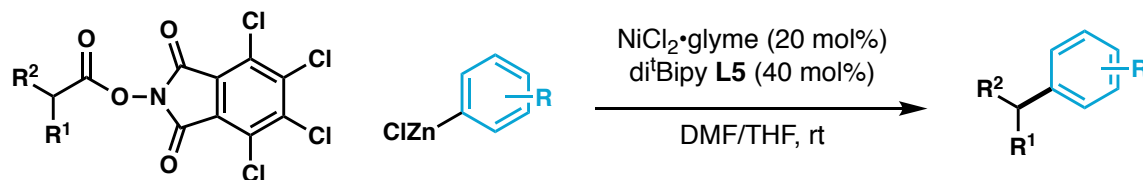

A culture tube with a Teflon™ septum screw-cap and stir bar was charged with  $\text{NiCl}_2 \cdot \text{glyme}$  or  $\text{NiCl}_2 \cdot 6\text{H}_2\text{O}$  (20 mol%),  $\text{di}^i\text{BuBipy L5}$  (40 mol%) and (if solid) TCNHPI ester (1.0 equiv.). The tube was evacuated and backfilled with argon. Reactions were run with a 3:2 ratio of THF:DMF. The volume of DMF used was calculated based on the titration of the arylzinc reagent solution. DMF (anhydrous) was added via syringe, and the mixture stirred for 2 minutes at room temperature for solid TCNHPI-esters. TCNHPI-ester (if liquid) was dissolved in DMF (anhydrous) and added to the culture tube containing  $\text{NiCl}_2 \cdot \text{glyme}$  or  $\text{NiCl}_2 \cdot 6\text{H}_2\text{O}$  (20 mol%) and  $\text{di}^i\text{BuBipy L5}$  (40 mol%). The mixture was stirred for 2 minutes at room temperature. Then, arylzinc reagent in THF (3.0 equiv.) was added in one portion, and the mixture was stirred for 12–16 hours at room temperature. The mixture was diluted with EtOAc or  $\text{Et}_2\text{O}$  and quenched with 1 M HCl (aq.). The reaction can also be quenched with  $\text{H}_2\text{O}$  or half-saturated aq.  $\text{NH}_4\text{Cl}$  solution for acid-sensitive substrates. The organic layer was washed with  $\text{H}_2\text{O}$  and brine, dried over anhydrous  $\text{Na}_2\text{SO}_4$ , and concentrated *in vacuo* (CAUTION: some of the products are volatile). The crude material was purified by silica gel column chromatography or preparative TLC (pTLC).

### General Procedure C5: Nickel-catalyzed Negishi Ethynylation

The Nickel-catalyzed Negishi ethynylation of redox-active esters was conducted according to a previously reported procedure.<sup>13</sup> Please see this reference for graphical supporting information.

#### Preparation of Nickel/ligand Solution

A culture tube was charged with NiCl<sub>2</sub>•6H<sub>2</sub>O (1 equiv.) and 4,4'-di-OMe-bipyridine (diOMeBipy - **L8**) (1 equiv.) under argon atmosphere. Anhydrous DMF (0.02 M) was added, and the homogeneous solution was stirred at room temperature for 15 minutes before being used.

#### Preparation of Ethynylzinc Chloride Solution

A flame-dried tube was charged with of freshly prepared 1 M ZnCl<sub>2</sub>/LiCl THF solution (2 equiv.), then ethynylmagnesium bromide (1.0 equiv., 0.5 M THF solution, Sigma-Aldrich) was added dropwise at room temperature. The resulting solution was stirred at room temperature for 30 minutes until it became homogeneous. The resulting ethynylzinc solution was then titrated with I<sub>2</sub> before use.

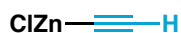

SI-37

#### Procedure for the Ni-catalyzed Decarboxylative Ethynylation

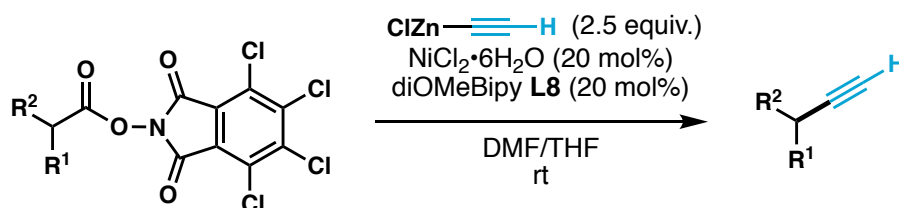

A culture tube was charged with TCNHPI redox-active ester (1.0 equiv.) and a stir bar. The tube was then evacuated and backfilled with argon from a balloon. A solution of NiCl<sub>2</sub>•6H<sub>2</sub>O/**L8** (0.02 M in DMF, NiCl<sub>2</sub>•6H<sub>2</sub>O (20 mol%), **L8** (20 mol%)) and ethynylzinc chloride solution in THF (2.5 equiv.) were added in quick succession. The reaction mixture was then stirred at room temperature for 12 h. The mixture was then quenched with 1 M HCl and extracted with EtOAc or Et<sub>2</sub>O three times, and the organic layer was dried over MgSO<sub>4</sub>. The organic layer was concentrated *in vacuo* at 35 °C. The crude product was purified by silica gel flash column chromatography or preparative TLC (pTLC) to afford the desired compound.

#### General Procedure C6: Iron-catalyzed Kumada Alkynylation

The Iron-catalyzed Kumada alkylation of redox-active esters was conducted according to a previously reported procedure.<sup>13</sup> Please see this reference for graphical supporting information.

### Preparation of Substituted Alkynylmagnesium Bromide Solution

A flame-dried tube was charged with alkyne (1.0 equiv.) and anhydrous THF (1 M). After that, freshly titrated ethylmagnesium bromide (1.0 equiv.) THF solution was added dropwise at room temperature. *Note:* gas was generated during the addition. The resulting solution was stirred at 50 °C for another 30 minutes. After cooling down to room temperature, the resulting Grignard solution was titrated with I<sub>2</sub> before use.

The following alkynylgrignard reagents were used according to **General Procedure C6**:

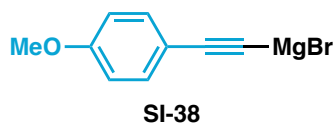

### Procedure for the Fe-catalyzed Decarboxylative Alkylation

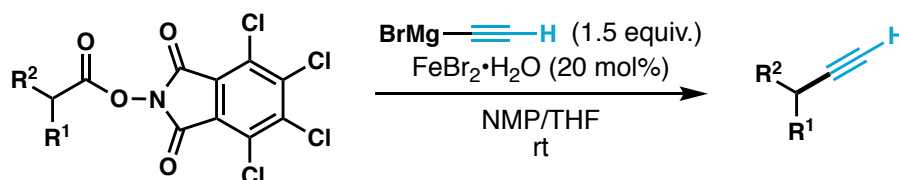

A culture tube was charged with TCNHPI redox-active ester (1.0 equiv.), FeBr<sub>2</sub>·H<sub>2</sub>O (20 mol%) and a stir bar. The tube was then evacuated and backfilled with argon from a balloon. The solid was dissolved in NMP (0.1 M) and cooled down to -15 °C. The prepared alkynylmagnesium bromide THF solution (1.5 equiv.) was added in one portion. After stirring for another 15 minutes, the reaction was quenched with 1 M HCl and extracted with Et<sub>2</sub>O three times, and the organic layer was dried over MgSO<sub>4</sub>. The organic layer was filtered through a short silica gel plug and concentrated *in vacuo* at 35 °C. The crude product was purified by silica gel flash column chromatography or preparative TLC (pTLC) to afford the desired product.

### General Procedure C7: Nickel-catalyzed Boronic Ester Suzuki Cross-Coupling

The Nickel-catalyzed Boronic Ester Suzuki of redox-active esters was conducted according to a previously reported procedure.<sup>14</sup> Please see this reference for graphical supporting information.

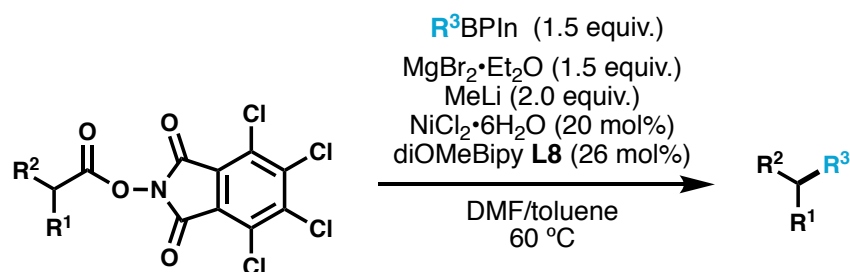

#### Preparation of Nickel/ligand Solution

A culture tube charged with NiCl<sub>2</sub>·6H<sub>2</sub>O (1 equiv.) and diOMeBipy L8 (1.36 equiv.) was evacuated and backfilled with argon three times. DMF (0.05 M) was added and the resulting mixture was stirred at room temperature overnight to afford a pale green suspension.

#### Preparation of B<sub>2</sub>pin<sub>2</sub>/MeLi-Complex Solution

A flame-dried culture tube was charged with B<sub>2</sub>pin<sub>2</sub> (1 equiv.) under argon atmosphere and anhydrous tetrahydrofuran (1 M) was added. A solution of MeLi (1.6 M in Et<sub>2</sub>O, 1 equiv.) was added at 0 °C and the resulting mixture was stirred at room temperature for 1 hour before use.

#### Procedure for the Ni-catalyzed Decarboxylative Cross-Coupling

A culture tube charged with TCNHPI redox-active ester (1.0 equiv.) and MgBr<sub>2</sub>·OEt<sub>2</sub> (1.5 equiv.) was evacuated and backfilled with argon from a balloon 3 times. THF (0.12 M) was added, and the mixture was stirred until no granular MgBr<sub>2</sub>·OEt<sub>2</sub> was observed. The Nickel/ligand solution (NiCl<sub>2</sub>·6H<sub>2</sub>O (20 mol%), diOMeBipy L8 (26 mol%)) was then added via a syringe and the resulting mixture was stirred vigorously until no visible solid was observed on the bottom of the reaction vessel. This mixture was cooled to 0 °C before a suspension of [B<sub>2</sub>pin<sub>2</sub>Me]Li in THF (3.3 equiv.) was added in one portion. After one hour, reaction was warmed to room temperature and stirred for an additional hour before being quenched with 0.1 M HCl. The reaction was then extracted with EtOAc (3x). The organic layers were then combined, dried over Na<sub>2</sub>SO<sub>4</sub>, filtered and concentrated. Purification by flash column chromatography afforded the desired compound.



### General Procedure C8: Nickel-Catalyzed Giese Conjugate Addition

The Nickel-catalyzed Giese Conjugate addition of redox-active esters was conducted according to a previously reported procedure.<sup>15</sup> Please see this reference for graphical supporting information.

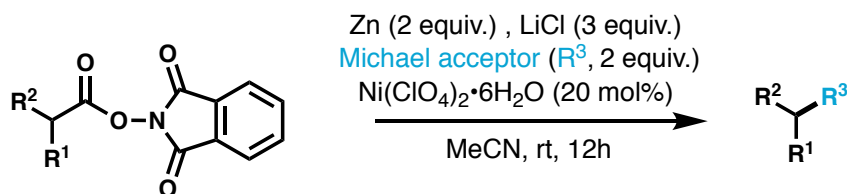

A culture tube was charged with LiCl (3.0 equiv.). *Note: Due to its hygroscopic nature, LiCl can be difficult to weigh on small scale. In our experience excess LiCl is not detrimental to the success of the reaction.* Next, NHPI RAE (1.0 equiv.), Zn powder (2.0 equiv.), and  $Ni(ClO_4)_2 \cdot 6H_2O$  (20 mol%) were added. A stir bar was added, and the culture tube was evacuated. The tube was backfilled with argon from a balloon, and Michael acceptor (2.0 equiv.) was added via syringe. To the reaction mixture was added MeCN (0.4 M), and the mixture was stirred overnight at room temperature. After at least 12 hours, a  $H_2O$  and sat. aq.  $NH_4Cl$  solution (1:1) were added. The mixture was extracted with EtOAc or  $Et_2O$  (3x), and the organic layer was dried over  $MgSO_4$ . The crude was purified by Silica gel flash column chromatography or preparative TLC (pTLC) to afford the desired compound.

## Troubleshooting: Frequently Asked Questions

### C–H Activation

#### Question 1:

How do I monitor the reaction?

#### Answer:

We use TLC analysis with UV visualization and staining ( $\text{KMnO}_4$ ) to monitor the reaction. Usually, it takes 24 hours for completion of the C–H activation step.

#### Question 2:

Can I run the C–H activation reaction in round bottom flask adapted with condenser instead of sealed tubes?

**Answer:** For large scale reaction (>2 g substrate) on azetidine heterocycle scaffolds, the reaction was carried out using a round bottom flask adapted with condenser without impacting the yield.

#### Question 3:

Does the enantiopurity of my compounds erode under hydrolysis conditions?

**Answer:** No, we transformed the carboxylic acid products into the corresponding RAEs and determined their *ee* by chiral HPLC. The RAEs have the same the *ee* compared with the corresponding C–H activation products, which means enantiopurity doesn't erode under hydrolysis conditions

#### Question 4:

Why are different equivalents of  $\text{Boc}_2\text{O}$  required for Boc-protection of aminoquinoline group?

**Answer:** This is due to different steric hindrance of arylated heterocycle. Four and five member-ring heterocycles possess higher reactivity than six member-ring towards Boc-protection, which causes different loading of  $\text{Boc}_2\text{O}$  in the Boc-protection step.

#### Question 5:

Is it possible to decrease the loading of Pd catalyst in C-H activation?

**Answer:** In order to obtain high yield for the C–H activation step, we usually used 10 mol% Pd loading. However, for some highly reactive substrates such as pyrrolidine, the catalyst loading

could be decreased to 5 mol% affording the product in comparable yield.

**Question 6:**

Why was only arylation achieved for C–H activation step?

**Answer:** We have performed some other transformation such as alkenylation, alkynylation, fluorination on heterocyclic substrates. Although the C–H activation reaction proceeded well, the following removal of directing group turns out to be problematic either because of the steric hindrance or elimination of HF to afford the corresponding unsaturated amide directing group by-product.

**Decarboxylative Cross-Couplings**

**Question 1:**

What are the advantages of using *N*-hydroxy-tetrachlorophthalimide (TCNHPI) over *N*-hydroxyphthalimide (NHPI) redox-active esters?

**Answer:**

For the decarboxylative cross-couplings conducted in this manuscript, the yields were in general higher starting from TCNHPI redox-active esters compared to NHPI redox-active esters. Moreover, the high crystallinity of the TCNHPI redox-active esters facilitate their purification and offer the possibility to upgrade the enantiomeric excess by recrystallization. In general, better enantioenrichment was achieved with the solvent system (Hexanes:EtOAc) compared to (CH<sub>2</sub>Cl<sub>2</sub>:MeOH).

**Question 2:**

Does the enantiopurity erode under certain DCC conditions?

**Answer:** We have compared the *ee* of final products obtained after the DCC reaction with the corresponding RAEs. Both have comparable *ee* indicating that enantiopurity doesn't erode under DCC conditions.

**Question 3:**

I want to synthesize a large quantity of a decarboxylative cross-coupling product. Can I increase the concentration in order to lower the amount of solvent?

**Answer:**

When working on a larger scale we typically increase the concentration to 0.5–1 M without any detrimental effect on the yield. However, Suzuki couplings are very sensitive to concentration and should always be conducted under standard conditions.

**Question 4:**

Suzuki reactions seem to be the most convenient to setup, are there any limitations in terms of substrate compatibility?

**Answer:** Although Suzuki reaction is among one of the most robust reaction that we have developed, it still has some limitations. For example, alkyl boronic acids are completely unreactive for this reaction. For some heterocycles, such as pyrazole, imidazole, we need to use the corresponding Bpin esters instead of boronic acids.

**Question 5:**

Do I need a glovebox to run the decarboxylative cross-coupling reactions?

**Answer:** A glovebox is not necessary to run this reaction. Typically, reaction vessels are degassed and refilled with argon three times before running the reactions. The reactions are also not very sensitive to water. The reactions can even be run in an open-flask and almost no erosion in yield is observed.

## Experimental Procedures and Characterization Data for Linear and Strained-Ring Systems (Figure 2)

### Compound B1

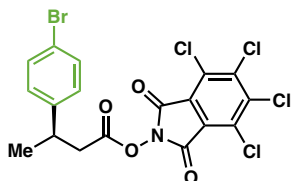

#### 4,5,6,7-tetrachloro-1,3-dioxisoindolin-2-yl (*R*)-3-(4-bromophenyl)butanoate (**B1**)

Following General Procedure **B** on 0.2 mmol scale with **A1**. Purification by recrystallization from CH<sub>2</sub>Cl<sub>2</sub>:MeOH afforded 81.3 mg (77%) of the title compound **B1**.

**Physical State:** pale yellow solid.

**m.p.:** 125 – 132 °C.

**<sup>1</sup>H NMR (600 MHz, CDCl<sub>3</sub>):** δ 7.48 – 7.45 (m, 2H), 7.17 – 7.13 (m, 2H), 3.36 (h, *J* = 6.9 Hz, 1H), 2.95 – 2.84 (m, 2H), 1.43 (d, *J* = 7.0 Hz, 3H) ppm.

**<sup>13</sup>C NMR (151 MHz, CDCl<sub>3</sub>):** δ 167.7, 157.6, 143.4, 141.2, 132.0, 130.7, 128.6, 124.8, 120.9, 39.4, 36.2, 21.4 ppm.

**TLC:** *R<sub>f</sub>* = 0.30 (9.5:0.5 Hexanes:EtOAc).

**[α]<sub>D</sub><sup>20</sup>** = –29.8 (*c* = 0.104, CHCl<sub>3</sub>).

*Note:* no HRMS could be recorded for **B1**

## Compound B2

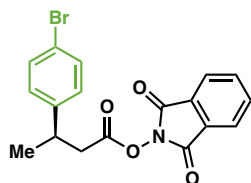

### 1,3-dioxoisindolin-2-yl (*R*)-3-(4-bromophenyl)butanoate (**B2**)

Following General Procedure **B** on 0.145 mmol scale with **A1**. Purification by flash column chromatography (Silica, 9:1 Hexanes:EtOAc) afforded 19.6 mg (35%) of the title compound **B2**.

**Physical State:** amorphous white solid.

**m.p.:** 86 – 92 °C.

**<sup>1</sup>H NMR (600 MHz, CDCl<sub>3</sub>):** δ 7.88 (dd, *J* = 5.5, 3.1 Hz, 2H), 7.79 (dd, *J* = 5.5, 3.1 Hz, 2H), 7.49 – 7.44 (m, 2H), 7.18 – 7.14 (m, 2H), 3.38 (dt, *J* = 8.3, 6.8 Hz, 1H), 2.95-2.85 (m, 1H), 2.87 (dd, *J* = 15.5, 8.3 Hz, 1H), 1.43 (d, *J* = 7.0 Hz, 3H) ppm.

**<sup>13</sup>C NMR (151 MHz, CDCl<sub>3</sub>):** δ 168.2, 162.0, 143.6, 134.9, 132.0, 129.0, 128.6, 124.1, 120.8, 39.5, 36.1, 21.5 ppm.

*Note: no HRMS could be recorded for B2*

**TLC:** *R<sub>f</sub>* = 0.26 (4:1 Hexanes:EtOAc).

**[α]<sub>D</sub><sup>20</sup>** = -41.0 (*c* = 0.20, CHCl<sub>3</sub>).

### Compound B3

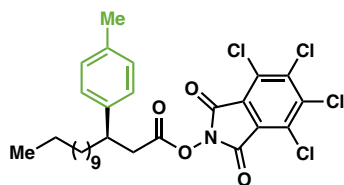

#### 4,5,6,7-tetrachloro-1,3-dioxoisindolin-2-yl (*R*)-3-(*p*-tolyl)tetradecanoate (**B3**)

Following General Procedure **B** on 0.28 mmol scale with **A2**. Purification by recrystallization from CH<sub>2</sub>Cl<sub>2</sub>:MeOH afforded 106 mg (63%) of the title compound **B3**.

**Physical State:** pale yellow solid.

**m.p.:** 125-132 °C.

**<sup>1</sup>H NMR (600 MHz, CDCl<sub>3</sub>):** δ 7.14 (d, *J* = 8.0 Hz, 2H), 7.11 (d, *J* = 8.1 Hz, 2H), 3.17 – 3.10 (m, 1H), 2.91 (qd, *J* = 15.5, 7.4 Hz, 2H), 2.33 (s, 3H), 1.83 – 1.75 (m, 1H), 1.72 – 1.64 (m, 1H), 1.32 – 1.12 (m, 18H), 0.87 (t, *J* = 7.0 Hz, 3H) ppm.

**<sup>13</sup>C NMR (151 MHz, CDCl<sub>3</sub>):** δ 168.1, 157.6, 141.1, 139.9, 136.5, 130.6, 129.5, 127.3, 124.9, 41.8, 38.6, 35.9, 32.1, 29.8, 29.8, 29.7, 29.6, 29.5, 29.5, 27.3, 22.8, 21.2, 14.3 ppm.

**HRMS (ESI-TOF):** calc'd for C<sub>29</sub>H<sub>33</sub>Cl<sub>4</sub>NNaO<sub>4</sub> [M+Na]<sup>+</sup>: 622.1056, found: 622.1054.

**TLC:** R<sub>f</sub> = 0.44 (9.5:0.5 Hexanes:EtOAc).

**[α]<sub>D</sub><sup>20</sup>** = -19.0 (*c* = 0.10, CHCl<sub>3</sub>).

## Compound B4

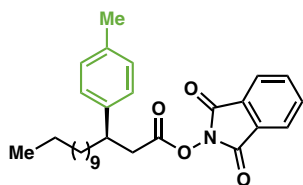

### 1,3-dioxoisindolin-2-yl (*R*)-3-(*p*-tolyl)tetradecanoate (**B4**)

Following General Procedure **B** on 0.2 mmol scale with **A2**. Purification by flash column chromatography (Silica, 19:1 Hexanes:EtOAc) afforded 91 mg (98%) of the title compound **B4**.

**Physical State:** amorphous white solid.

**<sup>1</sup>H NMR (600 MHz, CDCl<sub>3</sub>):** δ 7.87 (dd, *J* = 5.4, 3.1 Hz, 2H), 7.77 (dd, *J* = 5.4, 3.1 Hz, 2H), 7.16 – 7.10 (m, 4H), 3.20 – 3.11 (m, 1H), 2.91 (qd, *J* = 15.5, 7.4 Hz, 2H), 2.33 (s, 3H), 1.84 – 1.76 (m, 1H), 1.73 – 1.64 (m, 1H), 1.32 – 1.12 (m, 18H), 0.87 (t, *J* = 7.0 Hz, 3H) ppm.

**<sup>13</sup>C NMR (151 MHz, CDCl<sub>3</sub>):** δ 168.6, 162.0, 140.1, 136.4, 134.8, 129.4, 129.1, 127.4, 124.1, 41.8, 38.7, 36.0, 32.1, 29.8, 29.8, 29.7, 29.6, 29.5, 27.4, 22.8, 21.2, 14.3 ppm.

*Note: 1 carbon signal was not assigned due to overlaps.*

**HRMS (ESI-TOF):** calc'd for C<sub>29</sub>H<sub>38</sub>NO<sub>4</sub> [M+H]<sup>+</sup>: 464.2795, found: 464.2797.

**TLC:** R<sub>f</sub> = 0.39 (4:1 Hexanes:EtOAc).

[α]<sub>D</sub><sup>20</sup> = -18.8 (*c* = 0.25, CHCl<sub>3</sub>).



## Compound B5

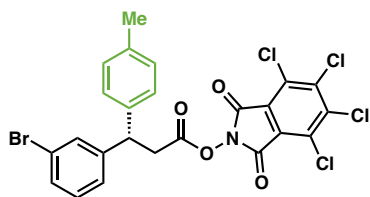

### 4,5,6,7-tetrachloro-1,3-dioxoisindolin-2-yl (*S*)-3-(3-bromophenyl)-3-(*p*-tolyl)propanoate (B5)

Following General Procedure **B** on 0.65 mmol scale with **A3**. Purification by recrystallization from CH<sub>2</sub>Cl<sub>2</sub>:MeOH afforded 296.8 mg (76%) of the title compound **B5**.

**Physical State:** pale yellow solid

**m.p.:** 102 – 110 °C

**<sup>1</sup>H NMR (600 MHz, CDCl<sub>3</sub>):** δ 7.41 – 7.37 (m, 1H), 7.36 (dt, *J* = 6.6, 2.1 Hz, 1H), 7.23 – 7.18 (m, 2H), 7.17 – 7.11 (m, 4H), 4.55 (t, *J* = 7.8 Hz, 1H), 3.42 – 3.32 (m, 2H), 2.32 (s, 3H) ppm.

**<sup>13</sup>C NMR (151 MHz, CDCl<sub>3</sub>):** δ 167.4, 157.4, 144.9, 141.1, 138.5, 137.1, 130.9, 130.6, 130.5, 130.3, 129.8, 127.5, 126.3, 124.8, 123.0, 46.0, 37.3, 21.2 ppm.

**HRMS (ESI-TOF):** calc'd for C<sub>24</sub>H<sub>14</sub>BrCl<sub>4</sub>NNaO<sub>4</sub> [M+Na]<sup>+</sup>: 621.8753, found: 621.8749

**TLC:** R<sub>f</sub> = 0.34 (9:1 Hexanes:EtOAc)

**[α]<sub>D</sub><sup>20</sup>** = -4.0 (*c* = 0.1, CHCl<sub>3</sub>)

## Compound B6

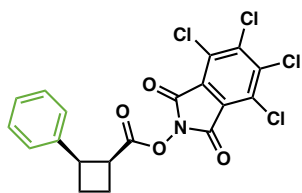

### 4,5,6,7-tetrachloro-1,3-dioxoisindolin-2-yl (1S,2R)-2-phenylcyclobutane-1-carboxylate (B6)

Following General Procedure **B** on 0.5 mmol scale with **A4**. Purification by flash column chromatography (silica, 15:1 Hexanes:EtOAc) afforded 343 mg (75%) of the title compound **B6**.

**Physical State:** amorphous solid

**<sup>1</sup>H NMR (600 MHz, CDCl<sub>3</sub>):** δ 7.38 (dd, *J* = 8.3, 7.0 Hz, 2H), 7.30 – 7.26 (m, 3H), 4.16 (q, *J* = 8.8 Hz, 1H), 3.94 – 3.88 (m, 1H), 2.79 – 2.69 (m, 1H), 2.54 – 2.41 (m, 3H) ppm.

**<sup>13</sup>C NMR (151 MHz, CDCl<sub>3</sub>):** δ 169.5, 140.9, 139.6, 130.9, 130.4, 128.7, 127.1, 127.1, 124.8, 42.5, 41.8, 25.1, 22.0 ppm.

**HRMS (ESI-TOF):** calc'd for C<sub>19</sub>H<sub>12</sub>Cl<sub>4</sub>NO<sub>4</sub> [M+H]<sup>+</sup>: 457.9520, found: 457.9516.

**TLC:** R<sub>f</sub> = 0.3 (10:1 Hexanes:EtOAc)

**[α]<sub>D</sub><sup>20</sup>** = -78.1 (*c* = 1.0, CHCl<sub>3</sub>)

## Compound B7

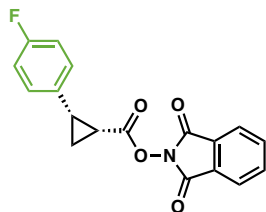

### 1,3-dioxisoindolin-2-yl (1S,2S)-2-(4-fluorophenyl)cyclopropane-1-carboxylate (B7)

Following General Procedure **B** on 0.3 mmol scale with **A5**. Purification by flash column chromatography (silica, 15:1 Hexanes:EtOAc) afforded 55 mg (56%) of the title compound **B7**.

**Physical State:** yellow oil.

**<sup>1</sup>H NMR (400 MHz, CDCl<sub>3</sub>):** δ 7.81 (dd, *J* = 5.5, 3.1 Hz, 2H), 7.73 (dd, *J* = 5.5, 3.1 Hz, 2H), 7.32 (dd, *J* = 8.5, 5.4 Hz, 2H), 6.99 (t, *J* = 8.7 Hz, 2H), 2.88 (q, *J* = 8.4 Hz, 1H), 2.43 (td, *J* = 8.4, 5.5 Hz, 1H), 1.77 (dt, *J* = 7.8, 5.4 Hz, 1H), 1.67 (td, *J* = 8.3, 5.2 Hz, 1H) ppm.

**<sup>19</sup>F NMR (400 MHz, CDCl<sub>3</sub>):** δ -115.31 ppm.

**<sup>13</sup>C NMR (151 MHz, CDCl<sub>3</sub>):** δ 167.6, 162.2 (d, *J* = 245.8 Hz), 162.0, 134.8, 131.4 (d, *J* = 8.2 Hz), 130.5 (d, *J* = 3.3 Hz), 129.0, 124.0, 115.3 (d, *J* = 21.5 Hz), 27.4, 18.1, 14.2 ppm.

**HRMS (ESI-TOF):** calc'd for C<sub>18</sub>H<sub>13</sub>FNO<sub>4</sub> [M+H]<sup>+</sup>: 326.0829, found: 326.0825.

**TLC:** R<sub>f</sub> = 0.3 (10:1 Hexanes:EtOAc)

**[α]<sub>D</sub><sup>20</sup>** = -62.7 (*c* = 0.6, CHCl<sub>3</sub>)

## Compound 14

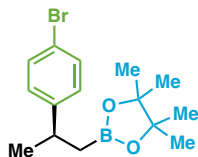

### **(R)-2-(2-(4-bromophenyl)propyl)-4,4,5,5-tetramethyl-1,3,2-dioxaborolane (14)**

Following General Procedure C7 on 0.037 mmol scale with **B2**. Purification by flash column chromatography (Silica, 25:1 Hexanes:EtOAc) afforded 5.6 mg (46%) of the title compound **14**.

**Physical State:** white amorphous solid.

**<sup>1</sup>H NMR (600 MHz, CDCl<sub>3</sub>):**  $\delta$  7.39 – 7.35 (m, 2H), 7.12 – 7.09 (m, 2H), 2.99 (h,  $J = 7.2$  Hz, 1H), 1.24 (d,  $J = 6.9$  Hz, 3H), 1.16 (d,  $J = 3.0$  Hz, 12H), 1.13 – 1.10 (m, 2H) ppm.

**<sup>13</sup>C NMR (151 MHz, CDCl<sub>3</sub>):**  $\delta$  148.4, 131.3, 128.6, 119.4, 83.2, 35.5, 24.9, 24.9 ppm.

**GC/MS (EI):**  $m/z$  (%) 324/326 (12%), 309/311 (20%), 183/185 (100%), 104 (84%).

**TLC:**  $R_f = 0.38$  (9.5:0.5 Hexanes:EtOAc).

**$[\alpha]_D^{20}$**  = -17.0 ( $c = 0.1$ , CHCl<sub>3</sub>).

## Compound 15

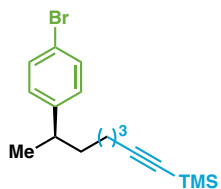

### (*R*)-7-(4-bromophenyl)oct-1-yn-1-yltrimethylsilane (**15**)

Following General Procedure **C2** on 0.05 mmol scale with **B2**, NiCl<sub>2</sub>•glyme (30 mol%), Bipy (60 mol%), and zinc reagent **SI-24**. Purification by pTLC (100% Hexanes) afforded 8.2 mg (48%) of the title compound **15**.

**Physical State:** clear oil.

**<sup>1</sup>H NMR (600 MHz, CDCl<sub>3</sub>):** δ 7.41 – 7.38 (m, 2H), 7.07 – 7.03 (m, 2H), 2.65 (h, *J* = 7.0 Hz, 1H), 2.17 (t, *J* = 7.1 Hz, 2H), 1.57 – 1.41 (m, 4H), 1.35 – 1.21 (m, 2H), 1.21 (d, *J* = 6.9 Hz, 3H), 0.12 (s, 9H) ppm.

**<sup>13</sup>C NMR (151 MHz, CDCl<sub>3</sub>):** δ 146.7, 131.5, 128.9, 119.5, 107.5, 84.7, 39.5, 37.8, 28.7, 26.9, 22.4, 19.9, 0.3 ppm.

**GC/MS (EI):** *m/z* (%) 321/323 (11%), 183 (96%), 104 (94%), 73 (100%).

**TLC:** *R<sub>f</sub>* = 0.53 (9.5:0.5 Hexanes:EtOAc).

**[α]<sub>D</sub><sup>20</sup>** = -18.8 (*c* = 0.25, CHCl<sub>3</sub>).

## Compound 16

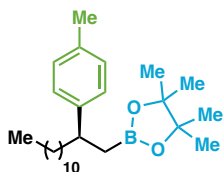

### (*S*)-4,4,5,5-tetramethyl-2-(2-(*p*-tolyl)tridecyl)-1,3,2-dioxaborolane (**16**)

Following General Procedure **C7** on 0.052 mmol scale with **B4**. Purification by flash column chromatography (Silica, 49:1 Hexanes:EtOAc) afforded 17.8 mg (85%) of the title compound **16**.

**Physical State:** clear oil.

**<sup>1</sup>H NMR (600 MHz, CDCl<sub>3</sub>):**  $\delta$  7.09 – 7.04 (m, 4H), 2.77 (qd,  $J = 8.1, 6.3$  Hz, 1H), 2.29 (s, 3H), 1.57 – 1.50 (m, 2H), 1.31 – 1.13 (m, 20H), 1.11 (d,  $J = 2.4$  Hz, 12H), 0.88 (t,  $J = 7.1$  Hz, 3H) ppm.

**<sup>13</sup>C NMR (151 MHz, CDCl<sub>3</sub>):**  $\delta$  144.8, 135.1, 128.8, 127.4, 83.0, 41.2, 39.6, 32.1, 29.8, 29.8, 29.8, 29.7, 29.5, 27.8, 24.8, 24.8, 22.8, 21.1, 14.3 ppm.

*Note: 1 carbon signal was not assigned due to overlaps.*

**GC/MS (EI):**  $m/z$  (%) 400 (2%), 385 (1%), 272 (4%), 245 (100%).

**TLC:**  $R_f = 0.45$  (9.5:0.5 Hexanes:EtOAc).

$[\alpha]_D^{20} = -4.4$  ( $c = 0.25$ , CHCl<sub>3</sub>).

## Compound 17

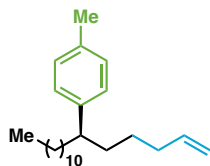

### (*R*)-1-(heptadec-1-en-6-yl)-4-methylbenzene (17)

Following General Procedure C2 on 0.05 mmol scale with **B3**, NiCl<sub>2</sub>•glyme (30 mol%), Bipy (60 mol%), and zinc reagent **SI-25**. Purification by pTLC (100% Hexanes) afforded 11 mg (72%) of the title compound **17**.

**Physical State:** clear oil.

**<sup>1</sup>H NMR (500 MHz, CDCl<sub>3</sub>):** δ 7.09 (d, *J* = 7.8 Hz, 2H), 7.04 – 6.99 (m, 2H), 5.80 – 5.68 (m, 1H), 4.99 – 4.86 (m, 2H), 2.49 – 2.39 (m, 1H), 2.32 (s, 3H), 2.07 – 1.91 (m, 2H), 1.65 – 1.56 (m, 2H), 1.54 – 1.46 (m, 2H), 1.33 – 1.04 (m, 20H), 0.88 (t, *J* = 7.0 Hz, 3H) ppm.

**<sup>13</sup>C NMR (126 MHz, CDCl<sub>3</sub>):** δ 143.3, 139.2, 135.2, 129.0, 127.6, 114.4, 45.6, 37.1, 36.6, 34.0, 32.1, 29.9, 29.8, 29.8, 29.7, 29.5, 27.8, 27.1, 22.8, 21.2, 14.3. ppm

*Note: 1 carbon signal was not assigned due to overlaps.*

**GC/MS (EI):** m/z (%) 328 (2%), 173 (44%), 132 (19%), 105 (100%).

**TLC:** R<sub>f</sub> = 0.75 (100% Hexanes).

**[α]<sub>D</sub><sup>20</sup>** = +3.2 (*c* = 0.25, CHCl<sub>3</sub>).

## Compound 18

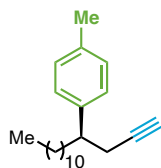

### (*R*)-1-methyl-4-(pentadec-1-yn-4-yl)benzene (**18**)

Following General Procedure **C5** on 0.049 mmol scale with **B3**, NiCl<sub>2</sub>•6H<sub>2</sub>O (20 mol%), diOMeBipy (20 mol%), and zinc reagent **SI-37**. Purification by pTLC (49:1 Hexanes:EtOAc) afforded 7.7 mg (53%) of the title compound **18**.

**Physical State:** colorless oil

**<sup>1</sup>H NMR (500 MHz, CDCl<sub>3</sub>):** δ 7.10 (q, *J* = 8.1 Hz, 4H), 2.73 (dtd, *J* = 9.5, 6.9, 5.3 Hz, 1H), 2.43 (dd, *J* = 7.0, 2.6 Hz, 2H), 2.32 (s, 3H), 1.93 (t, *J* = 2.6 Hz, 1H), 1.85 – 1.77 (m, 1H), 1.65 – 1.57 (m, 1H), 1.32 – 1.15 (m, 18H), 0.88 (t, *J* = 7.0 Hz, 3H) ppm.

**<sup>13</sup>C NMR (151 MHz, CDCl<sub>3</sub>):** δ 141.4, 136.0, 129.2, 127.5, 83.4, 69.5, 44.4, 35.2, 32.1, 29.8, 29.8, 29.8, 29.6, 29.5, 27.6, 26.5, 22.8, 21.2, 14.3 ppm.

*Note:* One carbon missing due to overlap.

**GC/MS (EI):** m/z (%) 259 (47%), 143 (3%), 128 (11%), 105 (100%)

**TLC:** R<sub>f</sub> = 0.66 (9.5:0.5 Hexanes:EtOAc)

**[α]<sub>D</sub><sup>20</sup>** = +6.0 (*c* = 0.25, CHCl<sub>3</sub>)



## Compound 19

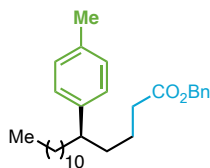

### benzyl (*R*)-5-(*p*-tolyl)hexadecanoate (**19**)

Following General Procedure **C8** on 0.054 mmol scale with **B4** and benzyl acrylate. Purification by pTLC (20:1 Hexanes:EtOAc) afforded 12.3 mg (52%) of the title compound **19**.

**Physical State:** amorphous white solid

**<sup>1</sup>H NMR (600 MHz, CDCl<sub>3</sub>):** δ 7.39 – 7.29 (m, 5H), 7.08 (d, *J* = 7.8 Hz, 2H), 7.00 (d, *J* = 8.0 Hz, 2H), 5.08 (s, 2H), 2.47 – 2.40 (m, 1H), 2.32 (s, 3H), 2.31 – 2.27 (m, 2H), 1.66 – 1.42 (m, 4H), 1.32 – 1.04 (m, 20H), 0.88 (t, *J* = 7.0 Hz, 3H) ppm.

**<sup>13</sup>C NMR (151 MHz, CDCl<sub>3</sub>):** δ 173.6, 142.7, 136.2, 135.4, 129.1, 128.7, 128.3, 128.3, 127.6, 66.2, 45.5, 37.1, 36.4, 34.5, 32.1, 29.9, 29.8, 29.8, 29.7, 29.5, 27.7, 23.2, 22.8, 21.2, 14.3 ppm.

*Note:* 1 carbon signal was not assigned due to overlaps.

**HRMS (ESI-TOF):** calc'd for C<sub>30</sub>H<sub>44</sub>NaO<sub>2</sub> [M+Na]<sup>+</sup>: 459.3234, found: 459.3238

**TLC:** R<sub>f</sub> = 0.34 (9.5:0.5 hexanes:EtOAc)

[α]<sub>D</sub><sup>20</sup> = +1.2 (*c* = 0.25, CHCl<sub>3</sub>)

## Compound 20

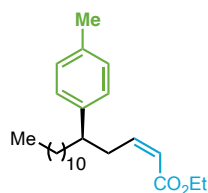

### ethyl (*R,Z*)-5-(*p*-tolyl)hexadec-2-enoate (**20**)

Following General Procedure **C3** on 0.047 mmol scale with **B3** and zinc reagent **SI-32**. Purification by pTLC (9:1 Hexanes:EtOAc) afforded 10 mg (58%) of the title compound **20**.

**Physical State:** colorless oil

**<sup>1</sup>H NMR (500 MHz, CDCl<sub>3</sub>):** δ 7.09 (d, *J* = 7.8 Hz, 2H), 7.05 (d, *J* = 8.0 Hz, 2H), 6.05 (dt, *J* = 11.6, 7.3 Hz, 1H), 5.68 (dt, *J* = 11.6, 1.8 Hz, 1H), 4.15 (q, *J* = 7.1 Hz, 2H), 3.10 (dddd, *J* = 15.4, 7.6, 5.8, 1.8 Hz, 1H), 2.81 (dddd, *J* = 15.8, 9.1, 6.9, 1.8 Hz, 1H), 2.62 (tt, *J* = 9.2, 5.6 Hz, 1H), 2.31 (s, 3H), 1.33 – 1.09 (m, 20H), 0.89 – 0.86 (m, 6H) ppm.

**<sup>13</sup>C NMR (151 MHz, CDCl<sub>3</sub>):** δ 166.6, 149.1, 141.9, 135.7, 129.1, 127.7, 120.3, 59.9, 45.6, 36.9, 35.9, 32.1, 29.9, 29.8, 29.8, 29.8, 29.7, 29.5, 27.6, 22.8, 21.2, 14.4, 14.3 ppm.

**HRMS (ESI-TOF):** calc'd for C<sub>25</sub>H<sub>41</sub>O<sub>2</sub> [M+H]<sup>+</sup>: 373.3101, found: 373.3097

**TLC:** R<sub>f</sub> = 0.37 (9.5:0.5 Hexanes:EtOAc)

**[α]<sub>D</sub><sup>20</sup>** = +4.5 (*c* = 0.20, CHCl<sub>3</sub>)

## Compound 21

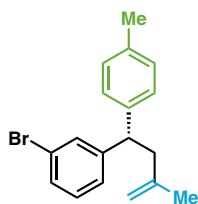

### (*S*)-1-bromo-3-(3-methyl-1-(*p*-tolyl)but-3-en-1-yl)benzene (**21**)

Following General Procedure **C3** on 0.05 mmol scale with **B5** and zinc reagent **SI-31**. Purification by pTLC (99:1 Hexanes:EtOAc) afforded 6.2 mg (39%) of the title compound **21**.

**Physical State:** colorless oil

**<sup>1</sup>H NMR (500 MHz, CDCl<sub>3</sub>):** δ 7.37 (t, *J* = 1.8 Hz, 1H), 7.28 (dt, *J* = 7.7, 1.7 Hz, 1H), 7.17 – 7.11 (m, 2H), 7.12 – 7.07 (m, 4H), 4.73 – 4.68 (m, 1H), 4.62 – 4.58 (m, 1H), 4.10 (t, *J* = 7.9 Hz, 1H), 2.78 – 2.68 (m, 2H), 2.30 (s, 3H), 1.68 (d, *J* = 1.2 Hz, 3H) ppm.

**<sup>13</sup>C NMR (151 MHz, CDCl<sub>3</sub>):** δ 147.5, 143.1, 141.0, 136.1, 131.1, 130.0, 129.3, 129.3, 127.8, 126.7, 122.6, 113.0, 48.7, 43.9, 22.7, 21.1 ppm.

**GC/MS (EI):** *m/z* (%) 314/316 (1%), 259/261 (100%), 180 (43%), 165 (94%).

**TLC:** *R<sub>f</sub>* = 0.74 (9.5:0.5 Hexanes:EtOAc)

**[α]<sub>D</sub><sup>20</sup>** = -4.5 (*c* = 0.20, CHCl<sub>3</sub>).

## Compound 22

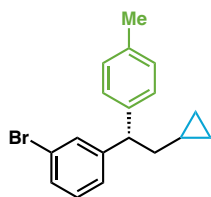

### (*S*)-1-bromo-3-(2-cyclopropyl-1-(*p*-tolyl)ethyl)benzene (**22**)

Following General Procedure **C2** on 0.05 mmol scale with **B5**, NiCl<sub>2</sub>•glyme (30 mol%), Bipy (60 mol%), and zinc reagent **SI-27**. by pTLC (49:1 Hexanes:EtOAc) afforded 8.1 mg (51%) of the title compound **22**.

**Physical State:** colorless oil

**<sup>1</sup>H NMR (500 MHz, CDCl<sub>3</sub>):** δ 7.39 (t, *J* = 1.9 Hz, 1H), 7.29 (ddd, *J* = 7.7, 2.0, 1.2 Hz, 1H), 7.17 (dt, *J* = 7.8, 1.5 Hz, 1H), 7.14 – 7.09 (m, 5H), 3.97 (t, *J* = 7.7 Hz, 1H), 2.31 (s, 3H), 1.96 – 1.83 (m, 2H), 0.62 – 0.53 (m, 1H), 0.43 – 0.35 (m, 2H), 0.09 – 0.01 (m, 2H) ppm.

**<sup>13</sup>C NMR (126 MHz, CDCl<sub>3</sub>):** δ 148.1, 141.5, 136.0, 131.1, 130.0, 129.3, 129.2, 127.9, 126.7, 122.6, 51.2, 41.0, 21.1, 9.8, 4.9, 4.8 ppm.

**GC/MS (EI):** *m/z* (%) 314/316 (5%), 259/261 (78%), 178/180 (39%), 165 (100%).

**TLC:** 0.76 (9.5:0.5 Hexanes:EtOAc)

**[α]<sub>D</sub><sup>20</sup>** = -19.6 (*c* = 0.25, CHCl<sub>3</sub>)

## Compound 23

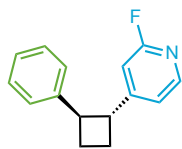

### 2-fluoro-4-((1*R*,2*R*)-2-phenylcyclobutyl)pyridine (**23**)

Following General Procedure **C1** on 0.1 mmol scale with **B6**, NiCl<sub>2</sub>•6H<sub>2</sub>O (30 mol%), BPhen (30 mol%), and boronic acid **SI-17** (3.0 equiv.). Purification by pTLC (silica, 8:1 Hexanes:EtOAc) afforded 10.2 mg (45%) of the title compound **23**.

**Physical State:** colorless oil

**<sup>1</sup>H NMR (600 MHz, CDCl<sub>3</sub>):** δ 8.08 – 8.03 (m, 1H), 7.64 (td, *J* = 8.0, 2.6 Hz, 1H), 7.33 – 7.28 (m, 2H), 7.23 – 7.19 (m, 3H), 6.86 (dd, *J* = 8.4, 3.0 Hz, 1H), 3.59 – 3.49 (m, 2H), 2.38 – 2.34 (m, 2H), 2.24 – 2.22 (m, 1H), 2.13 – 2.10 (m, 1H) ppm.

**<sup>19</sup>F NMR (400 MHz, CDCl<sub>3</sub>):** δ -71.93 ppm.

**<sup>13</sup>C NMR (151 MHz, CDCl<sub>3</sub>):** δ 162.6 (d, *J*<sub>C-F</sub> = 237.2 Hz), 145.9 (d, *J*<sub>C-F</sub> = 14.3 Hz), 143.6, 139.4 (d, *J*<sub>C-F</sub> = 7.9 Hz), 137.4 (d, *J*<sub>C-F</sub> = 4.5 Hz), 128.7, 126.7, 126.7, 109.2 (d, *J*<sub>C-F</sub> = 37.4 Hz), 48.4, 44.9, 26.2, 25.8 ppm.

**TLC:** 0.5 (10:1 Hexanes:EtOAc).

**HRMS (ESI-TOF):** calc'd for C<sub>15</sub>H<sub>15</sub>FN [M+H]<sup>+</sup> 228.1189; found 228.1190.

**[α]<sub>D</sub><sup>20</sup>** = 101.1 (*c* = 0.33, CHCl<sub>3</sub>).

## Compound 24

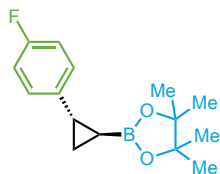

### 2-((1S,2S)-2-(4-fluorophenyl)cyclopropyl)-4,4,5,5-tetramethyl-1,3,2-dioxaborolane (24)

Following General Procedure **A1.5** on 0.1 mmol scale with **B7**. Purification by pTLC (silica, 25:1 Hexanes:Et<sub>2</sub>O) afforded 8.6 mg (33%) of the title compound **24**.

**Physical State:** colorless oil

**<sup>1</sup>H NMR (600 MHz, CDCl<sub>3</sub>):** δ 7.03 (dd, *J* = 8.6, 5.5 Hz, 2H), 6.92 (t, *J* = 8.7 Hz, 2H), 2.08 (dt, *J* = 8.1, 5.4 Hz, 1H), 1.25 (d, *J* = 5.7 Hz, 12H), 1.17 – 1.12 (m, 1H), 0.94 (ddd, *J* = 9.4, 5.3, 3.7 Hz, 1H), 0.23 (ddd, *J* = 9.8, 6.8, 5.5 Hz, 1H) ppm.

**<sup>19</sup>F NMR (400 MHz, CDCl<sub>3</sub>):** δ -118.30 ppm.

**<sup>13</sup>C NMR (151 MHz, CDCl<sub>3</sub>):** δ 161.3 (d, *J*<sub>C-F</sub> = 243.0 Hz), 139.0 (d, *J*<sub>C-F</sub> = 3.1 Hz), 127.3 (d, *J*<sub>C-F</sub> = 7.7 Hz), 115.1 (d, *J*<sub>C-F</sub> = 21.4 Hz), 83.4, 24.9, 24.9, 21.34, 14.92 ppm.

**TLC:** 0.3 (20:1 Hexanes:Et<sub>2</sub>O).

**HRMS (ESI-TOF):** calc'd for C<sub>15</sub>H<sub>21</sub>BFO<sub>2</sub> [M+H]<sup>+</sup> 263.1619; found 263.1617.

**[α]<sub>D</sub><sup>20</sup>** = 36.3 (*c* = 0.2, CHCl<sub>3</sub>).

## Experimental Procedures and Characterization Data for Azetidine Scaffolds (Figure 3–a)

### Compound B8:

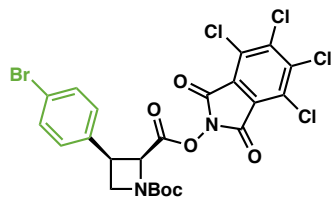

### 1-(tert-butyl) 2-(4,5,6,7-tetrachloro-1,3-dioxoisindolin-2-yl) (2*S*,3*R*)-3-(4-bromophenyl)azetidine-1,2-dicarboxylate (**B8**)

Following General Procedure **B** on 1.12 mmol scale with **A6**. Purified by flash column chromatography (silica, 6:1 Hexanes:EtOAc) afforded 520 mg (73%) of the title compound **B8**.

**Physical State:** yellow oil.

**<sup>1</sup>H NMR (600 MHz, CDCl<sub>3</sub>):** δ 7.51 (d, *J* = 8.4 Hz, 2H), 7.25 (d, *J* = 8.3 Hz, 2H), 5.32 (d, *J* = 9.2 Hz, 1H), 4.31 (q, *J* = 8.6 Hz, 2H), 4.23 (td, *J* = 8.9, 6.4 Hz, 1H), 1.49 (s, 9H) ppm.

**<sup>13</sup>C NMR (151 MHz, CDCl<sub>3</sub>):** δ 164.9, 156.4, 155.1, 141.0, 134.1, 132.3, 130.5, 130.0, 124.6, 122.7, 81.7, 64.3, 52.9, 37.5, 28.3 ppm.

**HRMS (ESI-TOF):** calc'd for C<sub>23</sub>H<sub>18</sub>BrCl<sub>4</sub>N<sub>2</sub>O<sub>6</sub> [M+H]<sup>+</sup>: 636.9102; found 636.9101.

**TLC:** R<sub>f</sub> = 0.3 (4:1 Hexanes:EtOAc).

**[α]<sub>D</sub><sup>20</sup>** = 38.9 (*c* = 1.0, CHCl<sub>3</sub>).

**Chiral HPLC:** Chiralpak IA, 4.6 x 250 mm; 45/55 *i*PrOH/hexanes, 1 mL/min, 254 nm; *t*<sub>R</sub> (minor) = 11.4 min, *t*<sub>R</sub> (major) = 15.0 min, >99% *ee*.

Racemic:

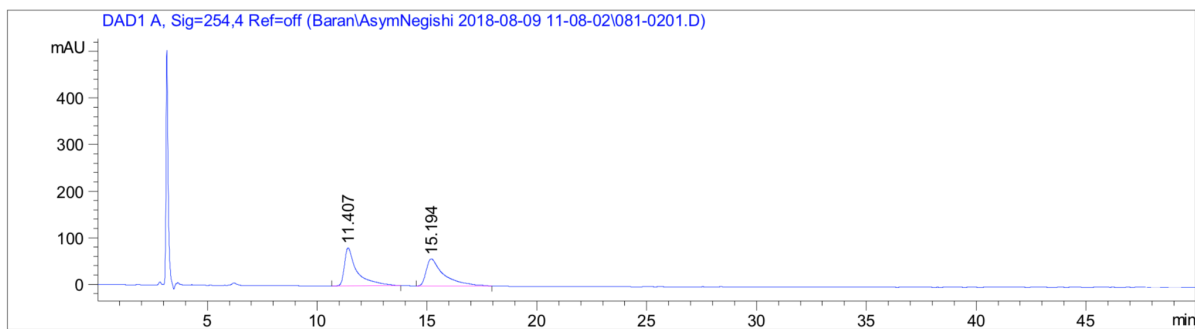

Enantioenriched **B8**:

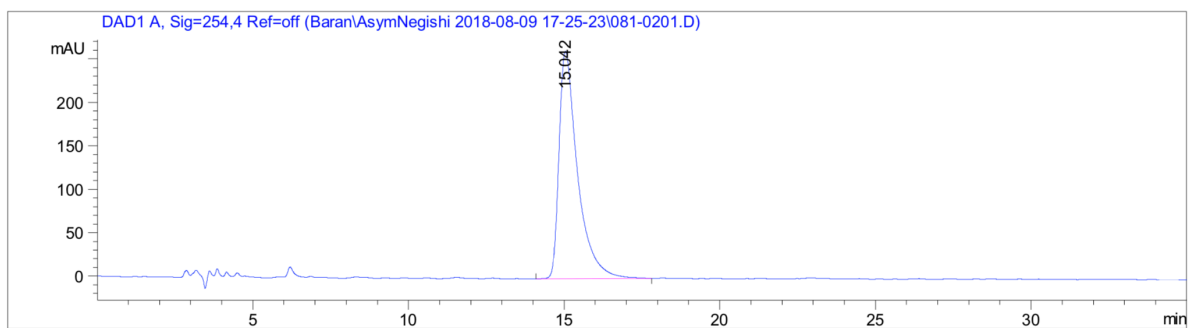

Signal 1: DAD1 A, Sig=254,4 Ref=off

| Peak # | RetTime [min] | Type | Width [min] | Area [mAU*s] | Height [mAU] | Area %  |
|--------|---------------|------|-------------|--------------|--------------|---------|
| 1      | 11.407        | BB   | 0.5591      | 3271.03638   | 81.69596     | 49.9908 |
| 2      | 15.194        | BB   | 0.7803      | 3272.24634   | 58.16977     | 50.0092 |

Signal 1: DAD1 A, Sig=254,4 Ref=off

| Peak # | RetTime [min] | Type | Width [min] | Area [mAU*s] | Height [mAU] | Area %   |
|--------|---------------|------|-------------|--------------|--------------|----------|
| 1      | 15.042        | BB   | 0.6146      | 1.08628e4    | 261.50439    | 100.0000 |



## Compound 26

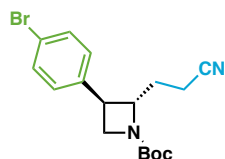

### *tert*-butyl (2*S*,3*R*)-3-(4-bromophenyl)-2-(2-cyanoethyl)azetidine-1-carboxylate (**26**)

Following General Procedure **C8** on 0.1 mmol scale with **B8** and acrylonitrile. Purification by pTLC (silica, 4:1 Hexanes:EtOAc) afforded 12.7 mg (35%) of the title compound **26**.

**Physical State:** colorless oil

**<sup>1</sup>H NMR (600 MHz, CDCl<sub>3</sub>, both rotamers)** δ 7.48 (d, *J* = 8.4 Hz, 2H), 7.14 (d, *J* = 8.4 Hz, 2H), 4.23 (q, *J* = 6.1 Hz, 1H), 4.18 (t, *J* = 8.7 Hz, 1H), 3.89 – 3.86 (m, 1H), 3.36 – 3.32 (m, 1H), 2.55 – 2.47 (m, 2H), 2.27 – 2.19 (m, 1H), 2.16 – 2.08 (m, 1H), 1.48 (s, 9H) ppm.

**<sup>13</sup>C NMR (151 MHz, CDCl<sub>3</sub>, both rotamers)** δ 157.1, 139.4, 132.2, 128.7, 121.4, 119.6, 80.7, 68.4, 54.0, 39.9, 31.7, 28.5, 13.9 ppm.

**HRMS (ESI-TOF):** calc'd for C<sub>17</sub>H<sub>22</sub>BrN<sub>2</sub>O<sub>2</sub> [M+H]<sup>+</sup>: 365.0865; found 365.0862.

**TLC:** R<sub>f</sub> = 0.3 (3:1 Hexanes:EtOAc).

[α]<sub>D</sub><sup>20</sup> = 2.2 (*c* = 0.1, CHCl<sub>3</sub>).

**Chiral HPLC:** Chiralpak IC, 4.6 x 250 mm; 10/90 *i*PrOH/hexanes, 1 mL/min, 210 nm; *t*<sub>R</sub> (minor) = 25.9 min, *t*<sub>R</sub> (major) = 23.8 min, >99% *ee*.

Racemic:

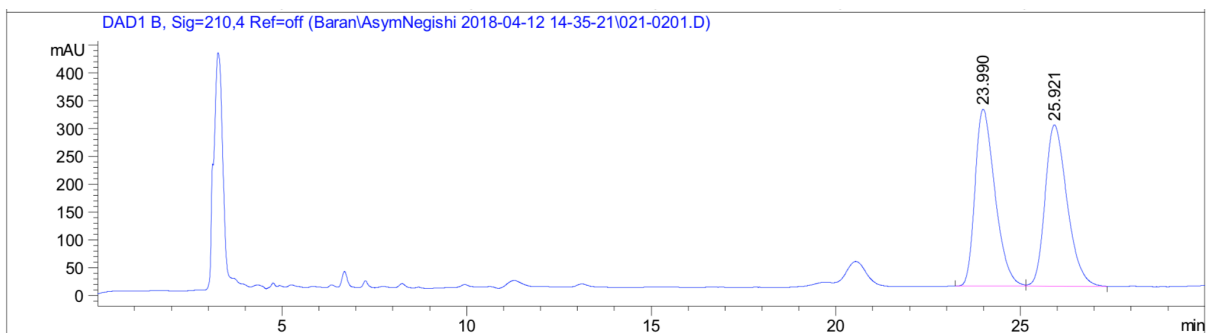

Enantioenriched **26**:

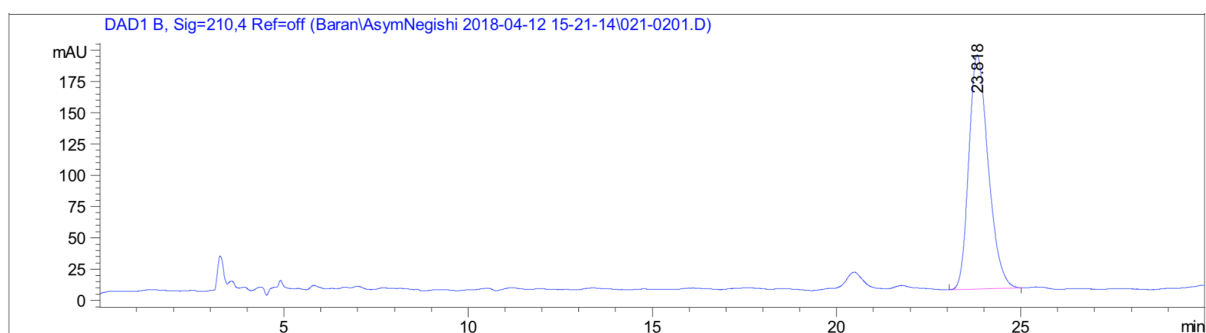

Signal 2: DAD1 B, Sig=210,4 Ref=off

| Peak # | RetTime [min] | Type | Width [min] | Area [mAU*s] | Height [mAU] | Area %  |
|--------|---------------|------|-------------|--------------|--------------|---------|
| 1      | 23.990        | BV   | 0.5731      | 1.19703e4    | 318.01227    | 49.8782 |
| 2      | 25.921        | VB   | 0.6357      | 1.20287e4    | 290.14304    | 50.1218 |

Signal 2: DAD1 B, Sig=210,4 Ref=off

| Peak # | RetTime [min] | Type | Width [min] | Area [mAU*s] | Height [mAU] | Area %   |
|--------|---------------|------|-------------|--------------|--------------|----------|
| 1      | 23.818        | BB   | 0.5674      | 6852.26123   | 187.06097    | 100.0000 |

## Compound 27

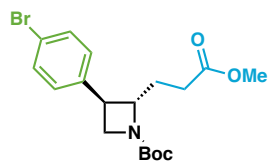

### *tert*-butyl (2*S*,3*R*)-3-(4-bromophenyl)-2-(3-methoxy-3-oxopropyl)azetidine-1-carboxylate (27)

Following General Procedure **C8** on 0.1 mmol scale with **B8** and methyl acrylate. Purification by pTLC (silica, 4:1 Hexanes:EtOAc) afforded 20.2 mg (50%) of the title compound **27**.

**Physical State:** colorless oil

**<sup>1</sup>H NMR (600 MHz, CDCl<sub>3</sub>, both rotamers)** δ 7.46 (d, *J* = 8.4 Hz, 2H), 7.13 (d, *J* = 8.4 Hz, 2H), 4.17 (dd, *J* = 10.0, 7.4 Hz, 2H), 3.83 (t, *J* = 7.7 Hz, 1H), 3.64 (s, 3H), 3.28 (q, *J* = 6.5 Hz, 1H), 2.42 (d, *J* = 54.1 Hz, 2H), 2.27 – 2.19 (m, 1H), 2.15 – 2.08 (m, 1H), 1.47 (s, 9H) ppm.

**<sup>13</sup>C NMR (151 MHz, CDCl<sub>3</sub>, both rotamers)** δ 173.1, 156.4, 139.7, 131.4, 128.2, 120.4, 79.5, 68.6, 53.2, 51.2, 39.5, 30.1, 29.3, 28.0 ppm.

**HRMS (ESI-TOF):** calc'd for C<sub>18</sub>H<sub>24</sub>BrNO<sub>4</sub>Na [M+Na]<sup>+</sup>: 420.0786; found 420.0785.

**TLC:** R<sub>f</sub> = 0.3 (4:1 Hexanes:EtOAc).

**[α]<sub>D</sub><sup>20</sup>** = 2.5 (*c* = 0.25, CHCl<sub>3</sub>).

**Chiral HPLC:** Chiralpak IC, 4.6 x 250 mm; 20/80 *i*PrOH/hexanes, 1 mL/min, 210 nm; *t*<sub>R</sub> (minor) = 9.0 min, *t*<sub>R</sub> (major) = 7.9 min, 97.5% *ee*.

Racemic:

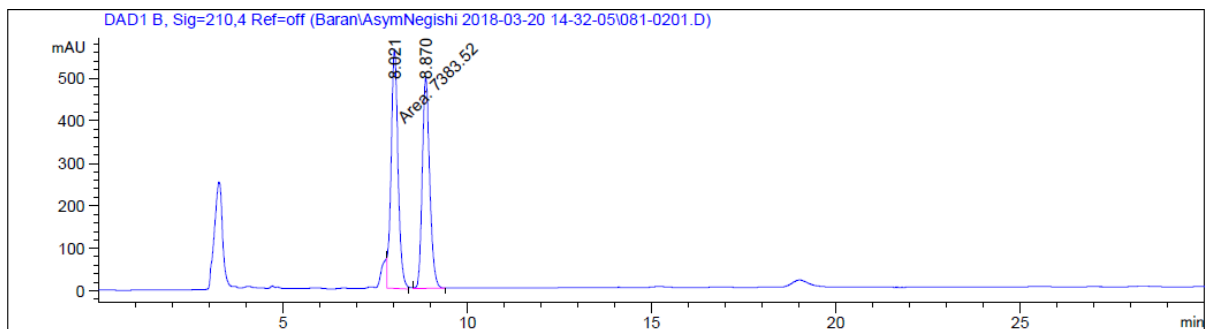

Enantioenriched 27:

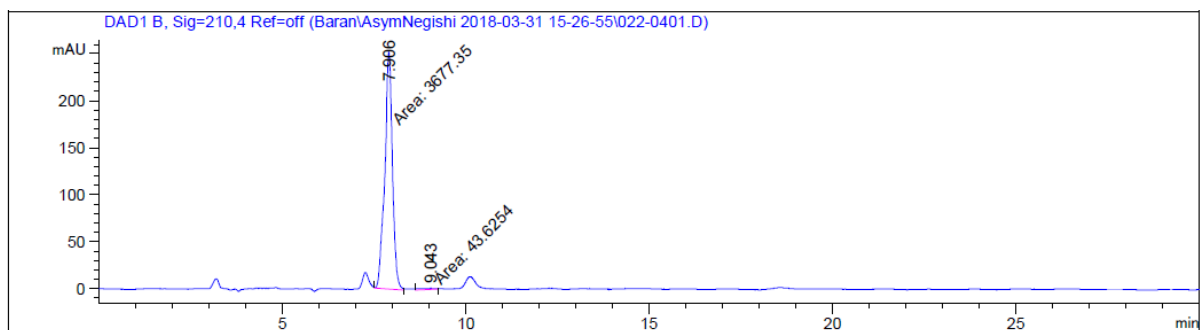

Signal 2: DAD1 B, Sig=210,4 Ref=off

| Peak # | RetTime [min] | Type | Width [min] | Area [mAU*s] | Height [mAU] | Area %  |
|--------|---------------|------|-------------|--------------|--------------|---------|
| 1      | 8.021         | MM   | 0.2194      | 7383.51953   | 560.79944    | 51.5350 |
| 2      | 8.870         | VB   | 0.2157      | 6943.67236   | 494.93085    | 48.4650 |

Signal 2: DAD1 B, Sig=210,4 Ref=off

| Peak # | RetTime [min] | Type | Width [min] | Area [mAU*s] | Height [mAU] | Area %  |
|--------|---------------|------|-------------|--------------|--------------|---------|
| 1      | 7.906         | MM   | 0.2432      | 3677.34570   | 251.98637    | 98.8276 |
| 2      | 9.043         | MM   | 0.6166      | 43.62544     | 1.17916      | 1.1724  |

## Compound 28

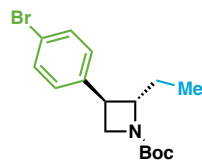

### *tert*-butyl (2*S*,3*R*)-3-(4-bromophenyl)-2-ethylazetidine-1-carboxylate (**28**)

Following General Procedure **C2** on 0.05 mmol scale with **B8**, NiCl<sub>2</sub>•glyme (30 mol%), *dit*BuBipy (40 mol%), and Zinc reagent **SI-28** (2.0 equiv.). Purification by pTLC (silica, 6:1 Hexanes:EtOAc) afforded 11.0 mg (65%) of the title compound **28**.

**Physical State:** colorless oil

**<sup>1</sup>H NMR (600 MHz, CDCl<sub>3</sub>, both rotamers)** δ 7.46 (d, *J* = 8.5 Hz, 2H), 7.15 (d, *J* = 8.4 Hz, 2H), 4.17 (td, *J* = 8.7, 0.6 Hz, 1H), 4.09 (s, 1H), 3.82 (dd, *J* = 8.7, 6.5 Hz, 1H), 3.25 (dt, *J* = 8.7, 6.2 Hz, 1H), 2.00 – 1.96 (m, 1H), 1.79 – 1.73 (m, 1H), 1.46 (s, 9H), 0.91 (t, *J* = 7.5 Hz, 3H) ppm.

**<sup>13</sup>C NMR (151 MHz, CDCl<sub>3</sub>, both rotamers)** δ 156.7, 141.1, 131.9, 128.9, 120.8, 79.7, 71.2, 53.6, 39.9, 28.6, 28.0, 8.8 ppm.

**HRMS (ESI-TOF):** calc'd for C<sub>16</sub>H<sub>23</sub>BrNO<sub>2</sub> [M+H]<sup>+</sup>: 340.0912; found 340.0913.

**TLC:** R<sub>f</sub> = 0.3 (4:1 Hexanes:EtOAc).

**[α]<sub>D</sub><sup>20</sup>** = 1.1 (*c* = 0.1, CHCl<sub>3</sub>).

**Chiral HPLC:** Chiralpak IC, 4.6 x 250 mm; 10/80 *i*PrOH/hexanes, 0.5 mL/min, 210 nm; *t*<sub>R</sub> (minor) = 16.4 min, *t*<sub>R</sub> (major) = 10.6 min, >99% *ee*.

Racemic:

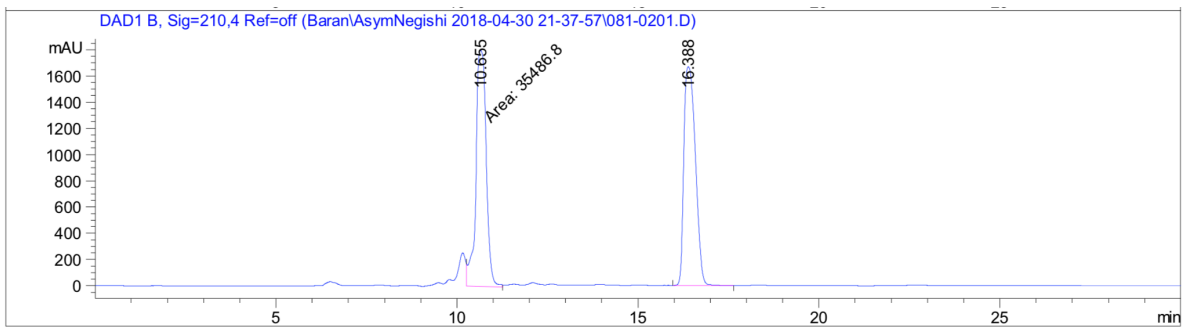

Enantioenriched **28**:

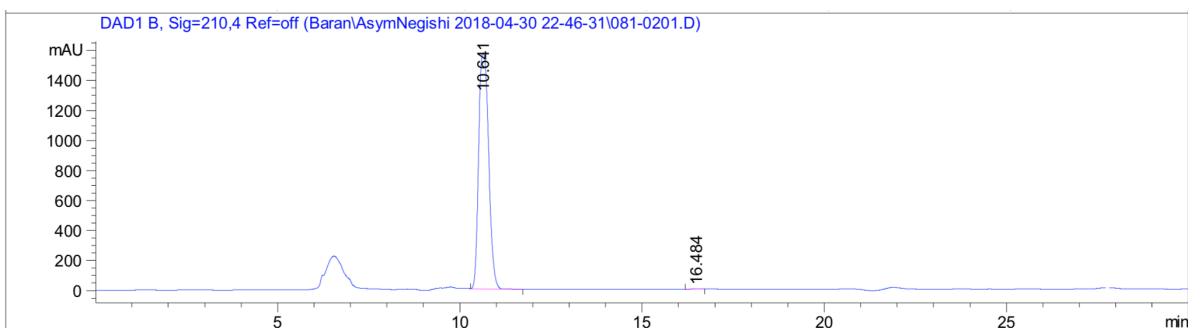

Signal 2: DAD1 B, Sig=210,4 Ref=off

| Peak # | RetTime [min] | Type | Width [min] | Area [mAU*s] | Height [mAU] | Area %  |
|--------|---------------|------|-------------|--------------|--------------|---------|
| 1      | 10.655        | MM   | 0.3288      | 3.54868e4    | 1799.06250   | 49.1405 |
| 2      | 16.388        | BB   | 0.3569      | 3.67281e4    | 1667.99353   | 50.8595 |

Signal 2: DAD1 B, Sig=210,4 Ref=off

| Peak # | RetTime [min] | Type | Width [min] | Area [mAU*s] | Height [mAU] | Area %  |
|--------|---------------|------|-------------|--------------|--------------|---------|
| 1      | 10.641        | BB   | 0.3042      | 2.99220e4    | 1571.05786   | 99.8656 |
| 2      | 16.484        | BB   | 0.1922      | 40.26966     | 2.75977      | 0.1344  |

## Compound 29

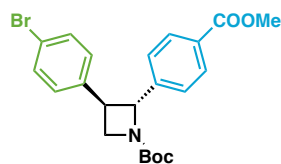

### *tert*-butyl (2*R*,3*R*)-3-(4-bromophenyl)-2-(4-(methoxycarbonyl)phenyl)azetidine-1-carboxylate (**29**)

Following General Procedure C1 on 0.05 mmol scale with **B8**, NiCl<sub>2</sub>•6H<sub>2</sub>O (20 mol%), BPhen (25 mol%), and boronic acid **SI-7** (3.0 equiv.). Purification by pTLC (silica, 4:1 Hexanes:EtOAc) afforded 20.1 mg (90%) of the title compound **29**.

**Physical State:** colorless oil

**<sup>1</sup>H NMR (600 MHz, CDCl<sub>3</sub>, both rotamers)** δ 8.04 (d, *J* = 8.0 Hz, 2H), 7.50 (d, *J* = 8.4 Hz, 2H), 7.39 (d, *J* = 8.0 Hz, 2H), 7.17 (d, *J* = 8.4 Hz, 2H), 5.12 (s, 1H), 4.35 (t, *J* = 8.6 Hz, 1H), 4.08 (t, *J* = 7.6 Hz, 1H), 3.92 (s, 3H), 3.50 (q, *J* = 7.0 Hz, 1H), 1.35 (s, 9H) ppm.

**<sup>13</sup>C NMR (151 MHz, CDCl<sub>3</sub>, both rotamers)** δ 167.0, 156.7, 146.4, 139.4, 132.2, 130.2, 129.7, 128.9, 125.8, 121.5, 80.5, 72.1, 53.4, 52.3, 44.0, 28.4 ppm.

**HRMS (ESI-TOF):** calc'd for C<sub>22</sub>H<sub>24</sub>BrNO<sub>4</sub>Na [M+Na]<sup>+</sup>: 468.0786; found 468.0781.

**TLC:** R<sub>f</sub> = 0.3 (8:1 Hexanes:EtOAc)

**[α]<sub>D</sub><sup>20</sup>** = 25.0 (*c* = 0.25, CHCl<sub>3</sub>).

**Chiral HPLC:** Chiralpak IC, 4.6 x 250 mm; 20/80 *i*PrOH/hexanes, 1 mL/min, 254 nm; *t*<sub>R</sub> (minor) = 13.8 min, *t*<sub>R</sub> (major) = 9.1 min, >99% *ee*.

Racemic:

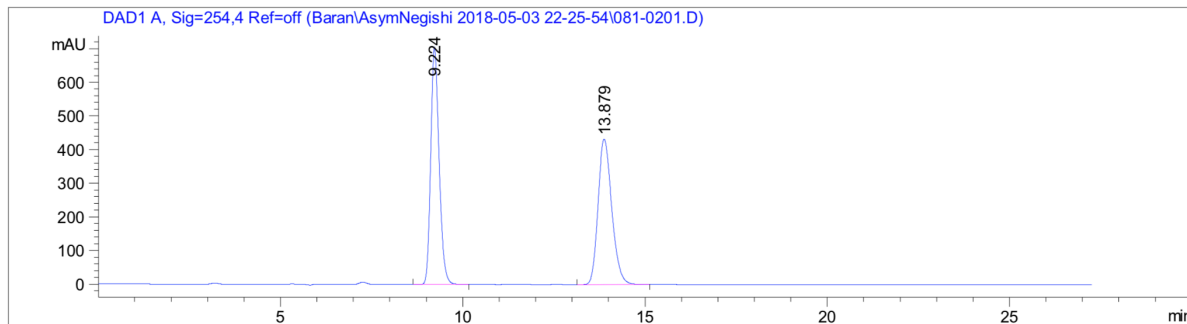

Enantioenriched 29:

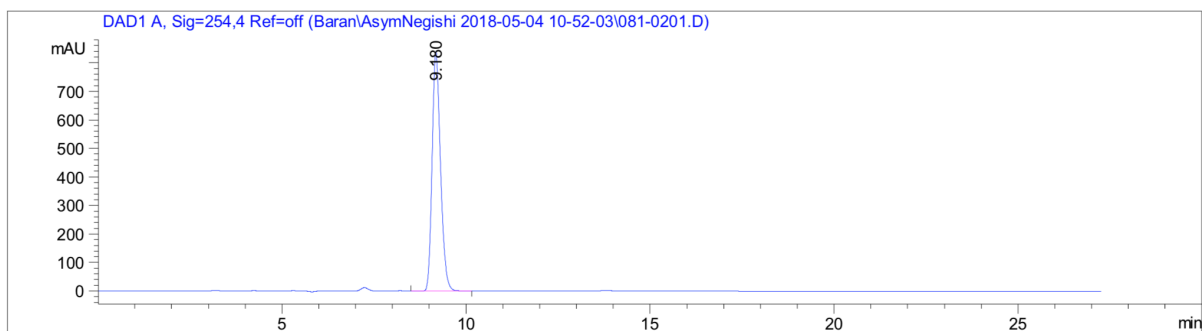

Signal 1: DAD1 A, Sig=254,4 Ref=off

| Peak # | RetTime [min] | Type | Width [min] | Area [mAU*s] | Height [mAU] | Area %  |
|--------|---------------|------|-------------|--------------|--------------|---------|
| 1      | 9.224         | BB   | 0.2467      | 1.12765e4    | 704.48834    | 49.9709 |
| 2      | 13.879        | BB   | 0.4023      | 1.12897e4    | 432.83252    | 50.0291 |

Signal 1: DAD1 A, Sig=254,4 Ref=off

| Peak # | RetTime [min] | Type | Width [min] | Area [mAU*s] | Height [mAU] | Area %   |
|--------|---------------|------|-------------|--------------|--------------|----------|
| 1      | 9.180         | BB   | 0.2457      | 1.33629e4    | 839.36615    | 100.0000 |



## Compound 30

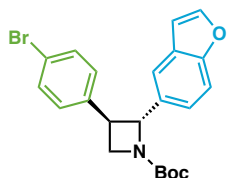

### *tert*-butyl (2*R*,3*R*)-2-(benzofuran-5-yl)-3-(4-bromophenyl)azetidine-1-carboxylate (**30**)

Following General Procedure C1 on 0.1 mmol scale with **B8**, NiCl<sub>2</sub>•6H<sub>2</sub>O (20 mol%), BPhen (25 mol%), and boronic acid **SI-12** (3.0 equiv.). Purification by pTLC (silica, 5:1 Hexanes:EtOAc) afforded 38.8 mg (91%) of the title compound **30**.

**Physical State:** colorless oil

**<sup>1</sup>H NMR (600 MHz, CDCl<sub>3</sub>, both rotamers)** δ 7.63 (s, 1H), 7.58 (s, 1H), 7.49 (dd, *J* = 8.4, 3.1 Hz, 3H), 7.29 (d, *J* = 8.2 Hz, 1H), 7.17 (d, *J* = 8.3 Hz, 2H), 6.75 (s, 1H), 5.16 (s, 1H), 4.39 (t, *J* = 8.6 Hz, 1H), 4.07 (t, *J* = 7.8 Hz, 1H), 3.61 – 3.55 (m, 1H), 1.34 (s, 9H) ppm.

**<sup>13</sup>C NMR (151 MHz, CDCl<sub>3</sub>, both rotamers)** δ 156.9, 154.7, 145.6, 139.9, 136.1, 132.0, 128.9, 127.7, 122.4, 121.2, 118.7, 111.6, 106.8, 80.1, 72.7, 53.3, 44.6, 28.4 ppm.

**HRMS (ESI-TOF):** calc'd for C<sub>22</sub>H<sub>22</sub>BrNO<sub>3</sub>Na [M+Na]<sup>+</sup> 450.0681; found 450.0675.

**TLC:** R<sub>f</sub> = 0.3 (8:1 Hexanes:EtOAc).

**[α]<sub>D</sub><sup>20</sup>** = 68.4 (*c* = 1.0, CHCl<sub>3</sub>).

**Chiral HPLC:** Chiralpak IC, 4.6 x 250 mm; 20/80 *i*PrOH/hexanes, 1 mL/min, 254 nm; *t*<sub>R</sub> (minor) = 9.5 min, *t*<sub>R</sub> (major) = 5.3 min, >99% *ee*.

Racemic:

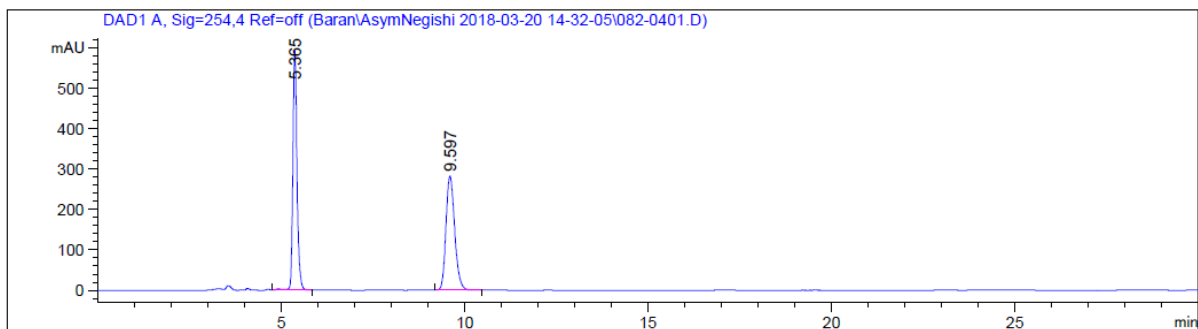

Enantioenriched **30**:

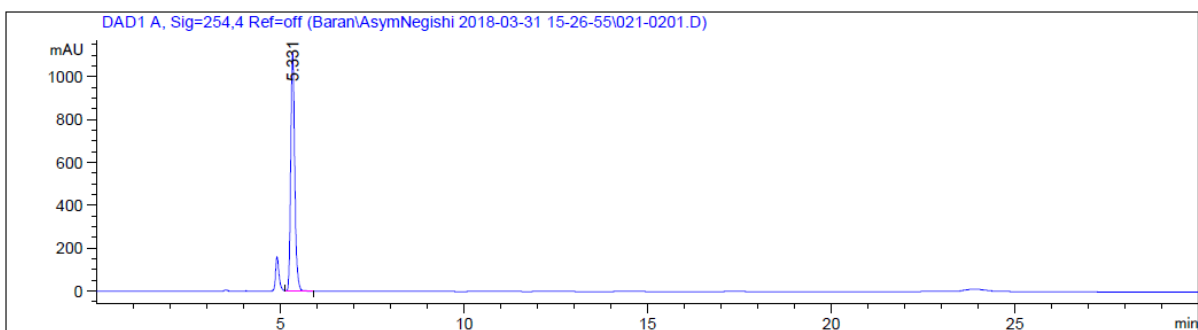

Signal 1: DAD1 A, Sig=254,4 Ref=off

| Peak # | RetTime [min] | Type | Width [min] | Area [mAU*s] | Height [mAU] | Area %  |
|--------|---------------|------|-------------|--------------|--------------|---------|
| 1      | 5.365         | VB R | 0.1193      | 4678.40088   | 593.62848    | 50.0864 |
| 2      | 9.597         | BB   | 0.2547      | 4662.25586   | 282.32898    | 49.9136 |

Signal 1: DAD1 A, Sig=254,4 Ref=off

| Peak # | RetTime [min] | Type | Width [min] | Area [mAU*s] | Height [mAU] | Area %   |
|--------|---------------|------|-------------|--------------|--------------|----------|
| 1      | 5.331         | VB   | 0.1162      | 8411.71875   | 1112.50671   | 100.0000 |

## Compound 31

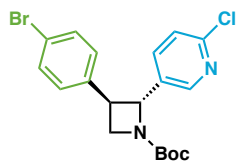

### *tert*-butyl (2*R*,3*R*)-3-(4-bromophenyl)-2-(6-chloropyridin-3-yl)azetidine-1-carboxylate (**31**)

Following General Procedure **C1** on 0.1 mmol scale with **B8**, NiCl<sub>2</sub>•6H<sub>2</sub>O (20 mol%), BPhen (25 mol%), and boronic acid **SI-13** (3.0 equiv.). Purification by pTLC (silica, 4:1 Hexanes:EtOAc) afforded 24.2 mg (57%) of the title compound **31**.

**Physical State:** colorless oil

**<sup>1</sup>H NMR (600 MHz, CDCl<sub>3</sub>, both rotamers)** δ 8.34 (d, *J* = 2.6 Hz, 1H), 7.67 (dd, *J* = 8.3, 2.5 Hz, 1H), 7.50 (d, *J* = 8.2 Hz, 2H), 7.35 (d, *J* = 8.2 Hz, 1H), 7.15 (d, *J* = 8.1 Hz, 2H), 5.08 (d, *J* = 6.6 Hz, 1H), 4.32 (t, *J* = 8.6 Hz, 1H), 4.09 (t, *J* = 7.9 Hz, 1H), 3.52 (q, *J* = 7.3 Hz, 1H), 1.38 (s, 9H) ppm.

**<sup>13</sup>C NMR (151 MHz, CDCl<sub>3</sub>, both rotamers)** δ 156.6, 151.0, 147.7, 138.6, 136.5, 135.7, 132.3, 128.8, 124.5, 121.7, 80.9, 69.4, 53.5, 43.7, 28.4 ppm.

**HRMS (ESI-TOF):** calc'd for C<sub>19</sub>H<sub>21</sub>BrClN<sub>2</sub>O<sub>2</sub> [M+H]<sup>+</sup>: 423.0475; found 423.0480.

**TLC:** R<sub>f</sub> = 0.4 (4:1 Hexanes:EtOAc)

[α]<sub>D</sub><sup>20</sup> = 35.1 (*c* = 1.0, CHCl<sub>3</sub>).

**Chiral HPLC:** Chiralpak IC, 4.6 x 250 mm; 20/80 *i*PrOH/hexanes, 1 mL/min, 210 nm; *t*<sub>R</sub> (minor) = 14.1 min, *t*<sub>R</sub> (major) = 9.9 min, >99% *ee*.

Racemic:

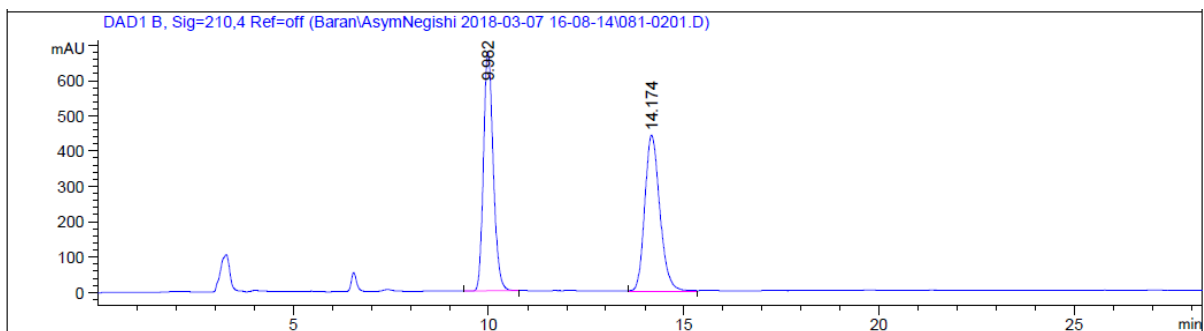

Enantioenriched **31**:

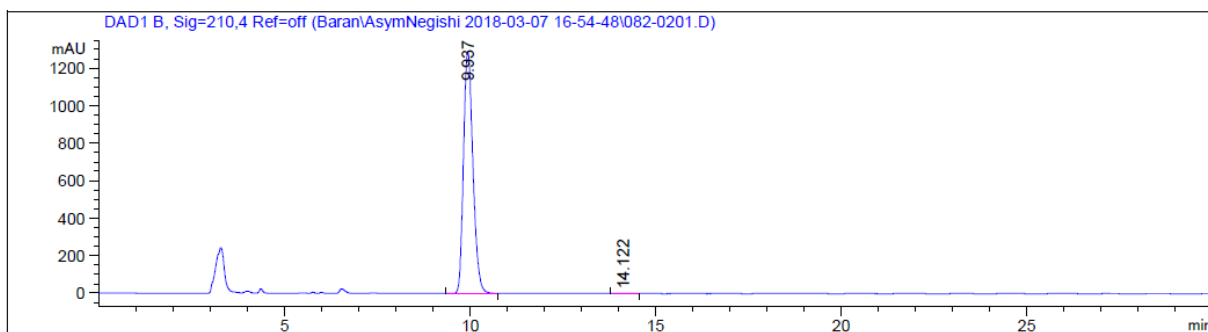

Signal 2: DAD1 B, Sig=210,4 Ref=off

| Peak # | RetTime [min] | Type | Width [min] | Area [mAU*s] | Height [mAU] | Area %  |
|--------|---------------|------|-------------|--------------|--------------|---------|
| 1      | 9.982         | BB   | 0.2690      | 1.17549e4    | 675.44183    | 50.0049 |
| 2      | 14.174        | BB   | 0.4135      | 1.17525e4    | 440.20493    | 49.9951 |

Signal 2: DAD1 B, Sig=210,4 Ref=off

| Peak # | RetTime [min] | Type | Width [min] | Area [mAU*s] | Height [mAU] | Area %  |
|--------|---------------|------|-------------|--------------|--------------|---------|
| 1      | 9.937         | BB   | 0.2766      | 2.28266e4    | 1289.03564   | 99.8148 |
| 2      | 14.122        | BB   | 0.2848      | 42.35325     | 1.83813      | 0.1852  |

## Compound 32

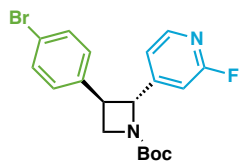

### *tert*-butyl (2*R*,3*R*)-3-(4-bromophenyl)-2-(2-fluoropyridin-4-yl)azetidine-1-carboxylate (**32**)

Following General Procedure **C1** on 0.1 mmol scale with **B8**, NiCl<sub>2</sub>•6H<sub>2</sub>O (20 mol%), BPhen (25 mol%), and boronic acid **SI-17** (3.0 equiv.). Purification by pTLC (silica, 4:1 Hexanes:EtOAc) afforded 29.6 mg (73%) of the title compound **32**.

**Physical State:** colorless oil

**<sup>1</sup>H NMR (600 MHz, CDCl<sub>3</sub>, both rotamers)** δ 8.20 (d, *J* = 5.2 Hz, 1H), 7.52 (d, *J* = 8.4 Hz, 2H), 7.17 (d, *J* = 8.4 Hz, 2H), 7.11 – 7.06 (m, 1H), 6.89 (s, 1H), 5.10 (d, *J* = 6.5 Hz, 1H), 4.31 (t, *J* = 8.6 Hz, 1H), 4.08 (t, *J* = 7.8 Hz, 1H), 3.53 – 3.44 (m, 1H), 1.40 (s, 9H) ppm.

**<sup>19</sup>F NMR (400 MHz, CDCl<sub>3</sub>):** δ -67.58 ppm.

**<sup>13</sup>C NMR (151 MHz, CDCl<sub>3</sub>, both rotamers)** δ 164.4 (d, *J*<sub>C-F</sub> = 239.2 Hz), 156.7, 156.1 (d, *J*<sub>C-F</sub> = 7.5 Hz), 148.2 (d, *J*<sub>C-F</sub> = 15.1 Hz), 138.5, 132.3, 128.8, 121.8, 118.2 (d, *J*<sub>C-F</sub> = 3.9 Hz), 106.3 (d, *J*<sub>C-F</sub> = 38.1 Hz), 81.0, 70.5, 53.7, 43.5, 28.4 ppm.

**HRMS (ESI-TOF):** calc'd for C<sub>19</sub>H<sub>21</sub>BrFN<sub>2</sub>O<sub>2</sub> [M+H]<sup>+</sup>: 407.0770; found 407.0770.

**TLC:** R<sub>f</sub> = 0.2 (8:1 Hexanes:EtOAc).

[α]<sub>D</sub><sup>20</sup> = 29.7 (*c* = 1.0, CHCl<sub>3</sub>).

**Chiral HPLC:** Chiralpak IC, 4.6 x 250 mm; 20/80 *i*PrOH/hexanes, 1 mL/min, 210 nm; *t*<sub>R</sub> (minor) = 19.8 min, *t*<sub>R</sub> (major) = 12.3 min, >99% *ee*.

Racemic:

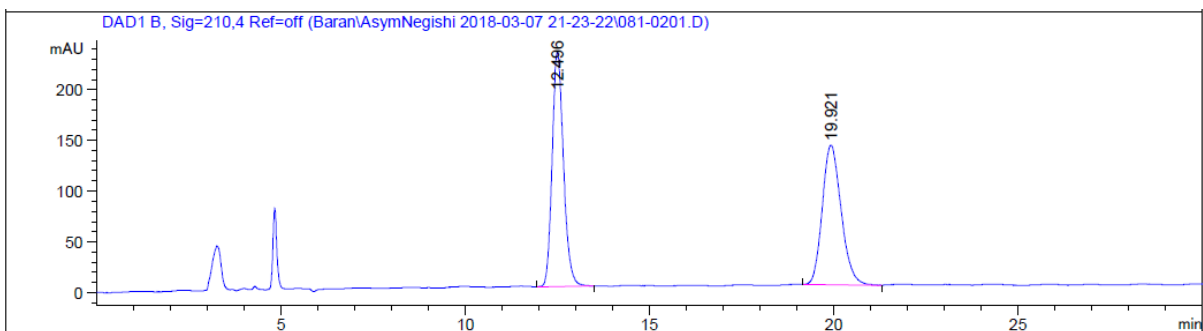

Enantioenriched **32**:

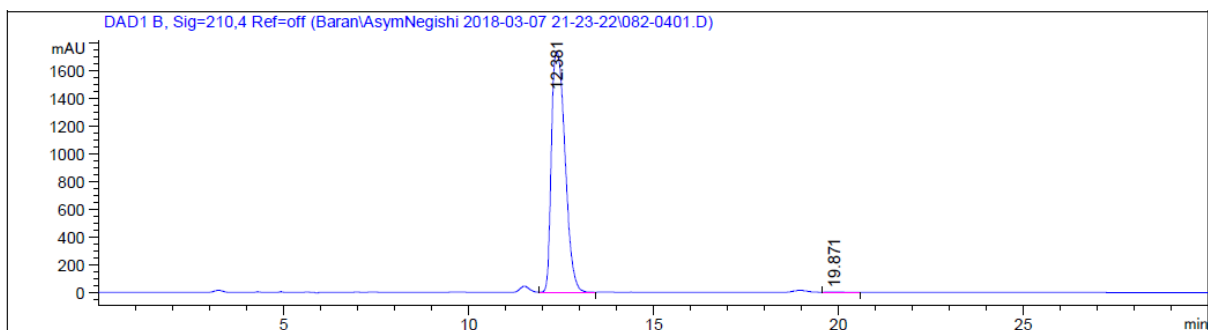

Signal 2: DAD1 B, Sig=210,4 Ref=off

| Peak # | RetTime [min] | Type | Width [min] | Area [mAU*s] | Height [mAU] | Area %  |
|--------|---------------|------|-------------|--------------|--------------|---------|
| 1      | 12.496        | BB   | 0.3277      | 4945.99561   | 231.08167    | 50.2319 |
| 2      | 19.921        | BB   | 0.5458      | 4900.31934   | 137.50674    | 49.7681 |

Signal 2: DAD1 B, Sig=210,4 Ref=off

| Peak # | RetTime [min] | Type | Width [min] | Area [mAU*s] | Height [mAU] | Area %  |
|--------|---------------|------|-------------|--------------|--------------|---------|
| 1      | 12.381        | VB   | 0.4050      | 4.45020e4    | 1736.51575   | 99.8414 |
| 2      | 19.871        | BB   | 0.3802      | 70.68443     | 2.25186      | 0.1586  |

## Experimental Procedures and Characterization Data for Pyrrolidine Scaffolds (Figure 3–b)

### Compound B10

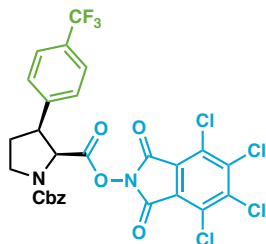

### 1-benzyl 2-(4,5,6,7-tetrachloro-1,3-dioxoisindolin-2-yl) (2S,3S)-3-(4-(trifluoromethyl)phenyl)pyrrolidine-1,2-dicarboxylate (B10)

Following General Procedure **B** on 1.2 mmol scale with **A7**. Purification by flash column chromatography (silica, 4:1 Hexanes:EtOAc) afforded 842 mg (97%) of the title compound **B10**.

**Physical State:** yellow oil.

**<sup>1</sup>H NMR (600 MHz, CDCl<sub>3</sub>, both rotamers):** δ 7.64 (t, *J* = 8.5 Hz, 2H), 7.48 (d, *J* = 8.0 Hz, 2H), 7.47 – 7.39 (m, 2H), 7.40 – 7.28 (m, 3H), 5.45 – 5.29 (m, 1 H), 5.21 – 5.13 (m, 1H), 5.10 – 4.97 (m, 1H), 4.01 – 3.86 (m, 2H), 3.67 – 3.62 (m, 1H), 2.77 – 2.70 (m, 1H), 2.36 – 2.31 (m, 1H) ppm.

**<sup>19</sup>F NMR (400 MHz, CDCl<sub>3</sub>):** δ -62.90 ppm.

**<sup>13</sup>C NMR (151 MHz, CDCl<sub>3</sub>, both rotamers):** δ 166.5, 166.5, 156.6, 154.7, 154.0, 141.1, 141.0, 138.7, 138.5, 136.4, 130.5, 130.5(q, *J*<sub>C-F</sub> = 33.2 Hz), 130.5, 128.8, 128.7, 128.7, 128.7, 128.6, 128.3, 128.3, 125.9 (q, *J*<sub>C-F</sub> = 4.5Hz), 124.7, 124.6, 124.2 (q, *J*<sub>C-F</sub> = 273.1 Hz), 124.2 (q, *J*<sub>C-F</sub> = 271.8 Hz), 68.0, 67.8, 62.5, 62.4, 48.2, 47.2, 46.3, 46.0, 28.3, 27.4 ppm.

**HRMS (ESI-TOF):** calc'd for C<sub>28</sub>H<sub>18</sub>Cl<sub>4</sub>F<sub>3</sub>N<sub>2</sub>O<sub>6</sub> [M+H]<sup>+</sup>: 674.987; found 674.9866.

**TLC:** R<sub>f</sub> = 0.2 (4:1 Hexanes:EtOAc).

[α]<sub>D</sub><sup>20</sup> = 55.3 (*c* = 1.0, CHCl<sub>3</sub>).

**Chiral HPLC:** Chiralpak IA, 4.6 x 250 mm; 45/55 *i*PrOH/hexanes, 1 mL/min, 254 nm; *t*<sub>R</sub> (minor) = 30.3 min, *t*<sub>R</sub> (major) = 24.0 min, >99% *ee*.

Racemic:

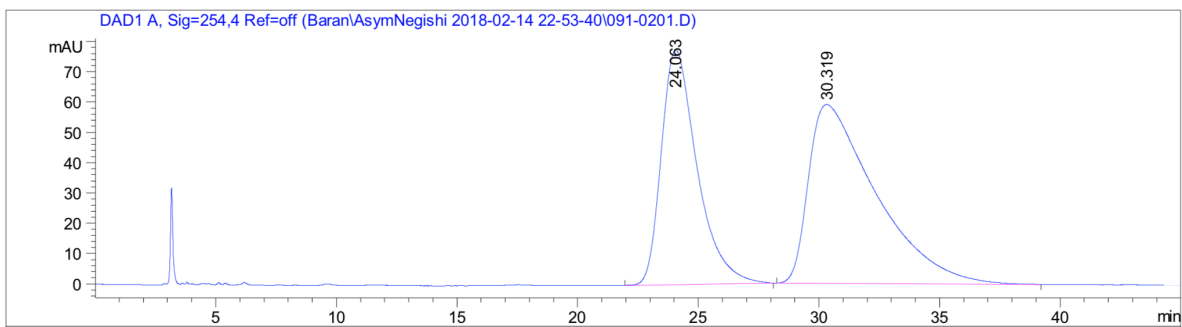

Enantioenriched **B10**:

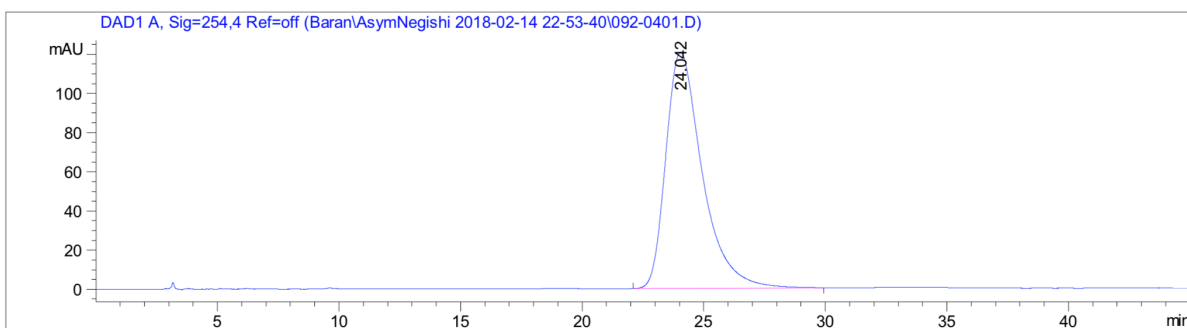

Signal 1: DAD1 A, Sig=254,4 Ref=off

| Peak # | RetTime [min] | Type | Width [min] | Area [mAU*s] | Height [mAU] | Area %  |
|--------|---------------|------|-------------|--------------|--------------|---------|
| 1      | 24.063        | BB   | 1.5191      | 7968.32715   | 77.39950     | 41.0140 |
| 2      | 30.319        | BB   | 2.5466      | 1.14600e4    | 58.98722     | 58.9860 |

Signal 1: DAD1 A, Sig=254,4 Ref=off

| Peak # | RetTime [min] | Type | Width [min] | Area [mAU*s] | Height [mAU] | Area %   |
|--------|---------------|------|-------------|--------------|--------------|----------|
| 1      | 24.042        | BB   | 1.5656      | 1.25722e4    | 120.66509    | 100.0000 |



### Compound 33

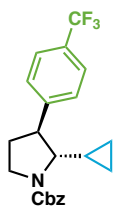

#### benzyl (2*S*,3*S*)-2-cyclopropyl-3-(4-(trifluoromethyl)phenyl)pyrrolidine-1-carboxylate (**33**)

Following General Procedure **C2** on 0.1 mmol scale with **B10**, NiCl<sub>2</sub>•glyme (20 mol%), di*t*BuBipy (25 mol%), and Zinc reagent **SI-27** (2.0 equiv.). Purification by pTLC (silica, 6:1 Hexanes:EtOAc) afforded 24.3 mg (62%) of the title compound **33**.

**Physical State:** colorless oil

**<sup>1</sup>H NMR (600 MHz, CDCl<sub>3</sub>, both rotamers)** δ 7.52 (d, *J* = 8.0 Hz, 2H), 7.36 – 7.33 (m, 5H), 7.22 (d, *J* = 7.6 Hz, 2H), 5.21 – 5.13 (m, 2H), 3.79 – 3.30 (m, 4H), 2.43 (dq, *J* = 14.8, 7.6 Hz, 1H), 1.97 – 1.89 (m, 1H), 1.05 – 0.94 (m, 1H), 0.72 – 0.42 (m, 3H), 0.08 (s, 1H) ppm.

**<sup>19</sup>F NMR (400 MHz, CDCl<sub>3</sub>):** δ -62.70 ppm.

**<sup>13</sup>C NMR (151 MHz, CDCl<sub>3</sub>, both rotamers)** δ 155.3, 148.1, 137.0, 129.0 (q, *J*<sub>C-F</sub> = 31.7 Hz), 128.6, 128.1, 127.3, 125.8 (q, *J*<sub>C-F</sub> = 3.8 Hz), 124.3 (q, *J*<sub>C-F</sub> = 271.8 Hz), 67.9, 67.1, 50.9, 50.0, 45.9, 32.5, 31.6, 16.5, 4.8, 2.0 ppm.

**HRMS (ESI-TOF):** calc'd for C<sub>22</sub>H<sub>23</sub>F<sub>3</sub>NO<sub>2</sub> [M+H]<sup>+</sup>: 390.1681; found 390.1682.

**TLC:** R<sub>f</sub> = 0.3 (8:1 Hexanes:EtOAc).

**[α]<sub>D</sub><sup>20</sup>** = -32.6 (*c* = 1.0, CHCl<sub>3</sub>).

**Chiral HPLC:** Chiralpak IA, 4.6 x 250 mm; 2.5/97.5 *i*PrOH/hexanes, 0.5 mL/min, 210 nm; *t*<sub>R</sub> (minor) = 21.2 min, *t*<sub>R</sub> (major) = 19.8 min, >99% *ee*.

Racemic:

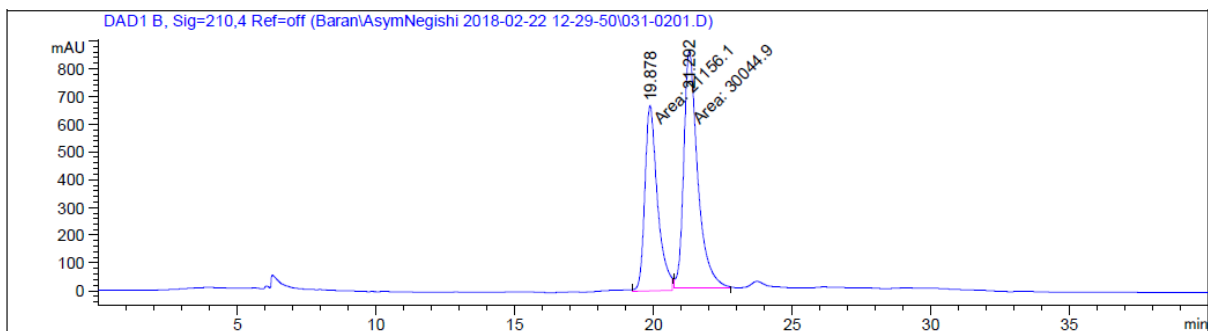

Enantioenriched **33**:

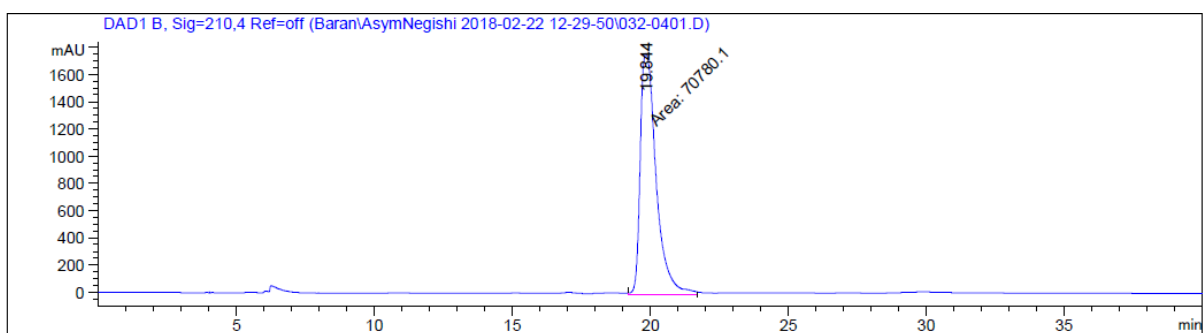

Signal 2: DAD1 B, Sig=210,4 Ref=off

| Peak # | RetTime [min] | Type | Width [min] | Area [mAU*s] | Height [mAU] | Area %  |
|--------|---------------|------|-------------|--------------|--------------|---------|
| 1      | 19.878        | MM   | 0.5287      | 2.11561e4    | 666.93622    | 41.3197 |
| 2      | 21.292        | MM   | 0.5856      | 3.00449e4    | 855.16187    | 58.6803 |

Signal 2: DAD1 B, Sig=210,4 Ref=off

| Peak # | RetTime [min] | Type | Width [min] | Area [mAU*s] | Height [mAU] | Area %   |
|--------|---------------|------|-------------|--------------|--------------|----------|
| 1      | 19.844        | MM   | 0.6668      | 7.07801e4    | 1769.18909   | 100.0000 |

## Compound 34

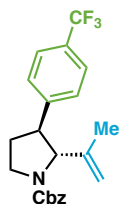

benzyl (2*R*,3*S*)-2-(prop-1-en-2-yl)-3-(4-(trifluoromethyl)phenyl)pyrrolidine-1-carboxylate  
(34)

Following General Procedure **C3** on 0.1 mmol scale with **B10**, Ni(acac)<sub>2</sub>·xH<sub>2</sub>O (30 mol%), 2,2'-bipyridine (30 mol%), and Zinc reagent **SI-29** (2.0 equiv.). Purification by pTLC (silica, 6:1 Hexanes:EtOAc) afforded 16.0 mg (41%) of the title compound **34**.

**Physical State:** colorless oil

**<sup>1</sup>H NMR (600 MHz, CDCl<sub>3</sub>, both rotamers)** δ 7.56 (d, *J* = 7.9 Hz, 2H), 7.38 – 7.29 (m, 7H), 5.22 – 5.05 (m, 2H), 4.86 – 4.80 (m, 1H), 4.71 – 4.64 (m, 1H), 4.39 – 4.22 (m, 1H), 3.87 – 3.79 (m, 1H), 3.56 (d, *J* = 9.3 Hz, 1H), 3.21 (d, *J* = 6.7 Hz, 1H), 2.33 – 2.26 (m, 1H), 1.98 (dd, *J* = 13.1, 7.1 Hz, 1H), 1.74 – 1.68 (m, 3H) ppm.

**<sup>19</sup>F NMR (400 MHz, CDCl<sub>3</sub>):** δ -62.73 ppm.

**<sup>13</sup>C NMR (151 MHz, CDCl<sub>3</sub>, both rotamers)** δ 155.1, 154.6, 146.5, 144.3, 143.7, 137.0, 136.9, 129.3 ((q, *J*<sub>C-F</sub> = 32.5 Hz), 128.6, 128.5, 128.1, 128.0, 127.9, 127.7, 125.8 (q, *J*<sub>C-F</sub> = 3.8 Hz), 124.2 (q, *J*<sub>C-F</sub> = 271.8 Hz), 111.3, 111.2, 69.5, 67.1, 50.1, 49.0, 46.8, 46.4, 32.4, 31.6, 18.8 ppm.

**HRMS (ESI-TOF):** calc'd for C<sub>22</sub>H<sub>23</sub>F<sub>3</sub>NO<sub>2</sub> [M+H]<sup>+</sup>: 390.1681; found 390.1683.

**TLC:** R<sub>f</sub> = 0.3 (8:1 Hexanes:EtOAc).

**[α]<sub>D</sub><sup>20</sup>** = -36.1 (*c* = 1.0, CHCl<sub>3</sub>).

**Chiral HPLC:** Chiralpak ODH, 4.6 x 250 mm; 5/95 *i*PrOH/hexanes, 0.5 mL/min, 210 nm; *t*<sub>R</sub> (minor) = 17.8 min, *t*<sub>R</sub> (major) = 16.3 min, 97.5% *ee*.

Racemic:

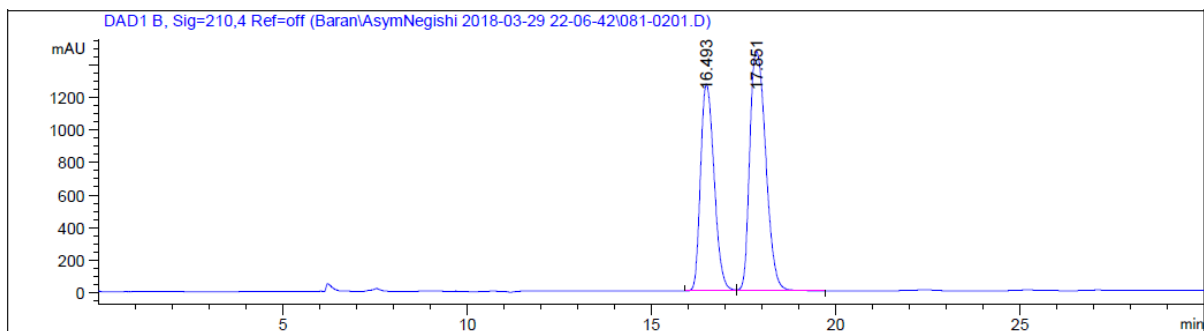

Enantioenriched **34**:

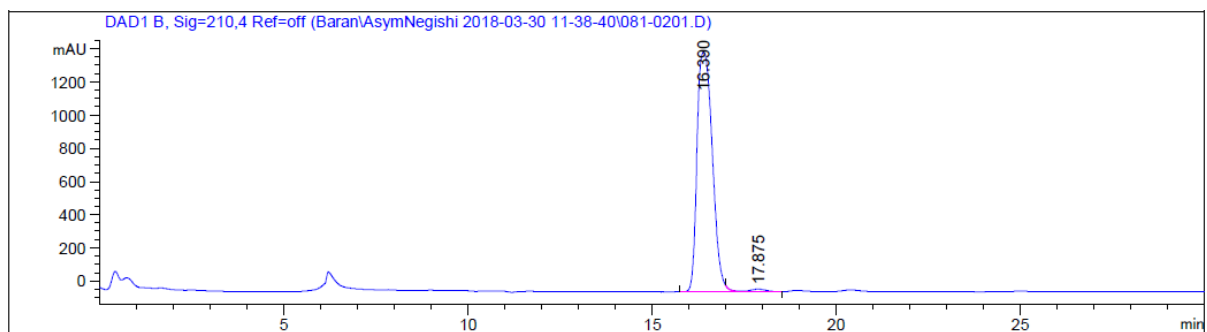

Signal 2: DAD1 B, Sig=210,4 Ref=off

| Peak # | RetTime [min] | Type | Width [min] | Area [mAU*s] | Height [mAU] | Area %  |
|--------|---------------|------|-------------|--------------|--------------|---------|
| 1      | 16.493        | BV   | 0.4010      | 3.25884e4    | 1271.60510   | 42.2750 |
| 2      | 17.851        | VB   | 0.4770      | 4.44983e4    | 1470.84521   | 57.7250 |

Signal 2: DAD1 B, Sig=210,4 Ref=off

| Peak # | RetTime [min] | Type | Width [min] | Area [mAU*s] | Height [mAU] | Area %  |
|--------|---------------|------|-------------|--------------|--------------|---------|
| 1      | 16.390        | BV R | 0.4628      | 4.16565e4    | 1442.90723   | 98.8485 |
| 2      | 17.875        | VV E | 0.4328      | 485.25125    | 15.51845     | 1.1515  |

## Compound 35

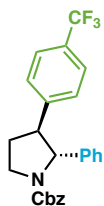

### benzyl (2*R*,3*S*)-2-phenyl-3-(4-(trifluoromethyl)phenyl)pyrrolidine-1-carboxylate (**35**)

Following General Procedure C4 on 0.1 mmol scale with **B10**, NiCl<sub>2</sub>•glyme (20 mol%), di*t*BuBipy (25 mol%), and Zinc reagent **SI-35** (2.0 equiv.). Purification by pTLC (silica, 6:1 Hexanes:EtOAc) afforded 31.2 mg (73%) of the title compound **35**.

**Physical State:** colorless oil

**<sup>1</sup>H NMR (600 MHz, CDCl<sub>3</sub>, both rotamers)** δ 7.55 (d, *J* = 7.9 Hz, 2H), 7.42 – 7.21 (m, 7H), 7.20 – 7.04 (m, 4H), 6.79 (d, *J* = 7.4 Hz, 1H), 5.25 – 4.80 (m, 3H), 4.06 – 3.75 (m, 2H), 3.34 (s, 1H), 2.37 – 2.32 (m, 1H), 2.10 (s, 1H) ppm.

**<sup>19</sup>F NMR (400 MHz, CDCl<sub>3</sub>):** δ -62.73 ppm.

**<sup>13</sup>C NMR (151 MHz, CDCl<sub>3</sub>, both rotamers)** δ 154.9, 154.7, 145.6, 145.4, 142.9, 142.1, 136.9, 136.5, 129.5 (q, *J*<sub>C-F</sub> = 32.6 Hz), 128.7, 128.3, 128.1, 127.8, 127.7, 127.4, 127.3, 125.8 (q, *J*<sub>C-F</sub> = 3.9 Hz), 125.7, 124.2 (q, *J*<sub>C-F</sub> = 271.8 Hz), 68.3, 67.1, 67.0, 55.3, 54.1, 47.5, 47.0, 32.5, 31.8 ppm.

**HRMS (ESI-TOF):** calc'd for C<sub>25</sub>H<sub>23</sub>F<sub>3</sub>NO<sub>2</sub> [M+H]<sup>+</sup>: 426.1681; found 426.1687.

**TLC:** R<sub>f</sub> = 0.3 (8:1 Hexanes:EtOAc).

**[α]<sub>D</sub><sup>20</sup>** = -67.6 (*c* = 1.0, CHCl<sub>3</sub>).

**Chiral HPLC:** Chiralpak IC, 4.6 x 250 mm; 20/80 *i*PrOH/hexanes, 1 mL/min, 210 nm; *t*<sub>R</sub> (minor) = 8.0 min, *t*<sub>R</sub> (major) = 6.6 min, 96% *ee*.

Racemic:

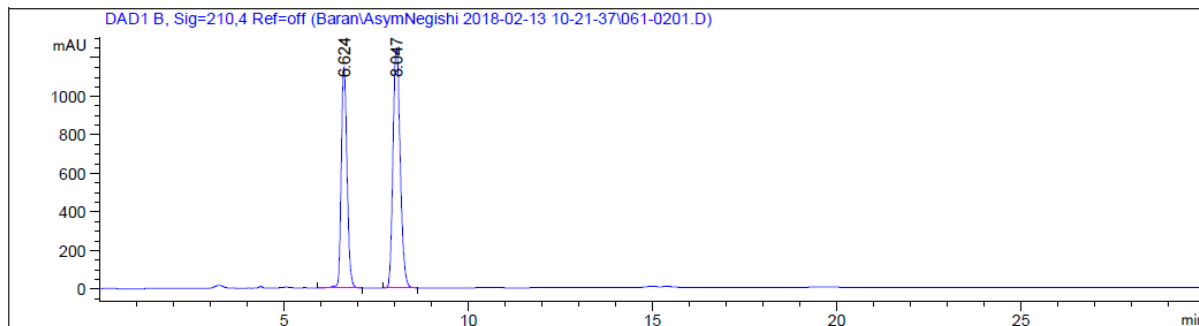

Enantioenriched **35**:

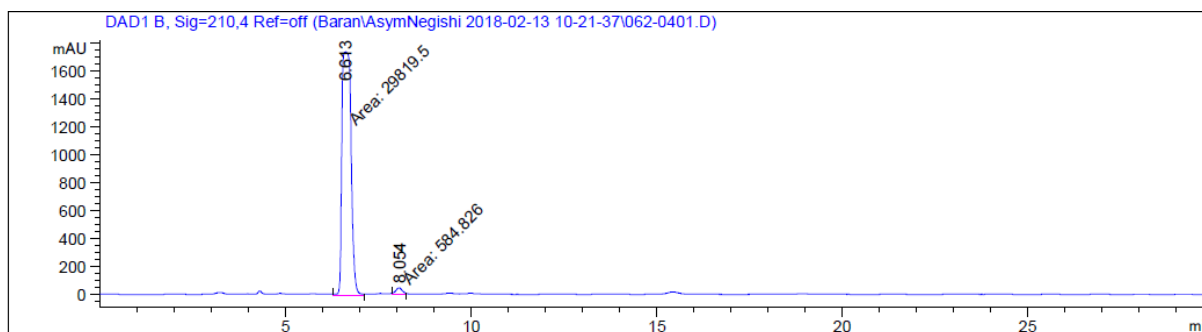

Signal 2: DAD1 B, Sig=210,4 Ref=off

| Peak # | RetTime [min] | Type | Width [min] | Area [mAU*s] | Height [mAU] | Area %  |
|--------|---------------|------|-------------|--------------|--------------|---------|
| 1      | 6.624         | BB   | 0.1678      | 1.23321e4    | 1144.03088   | 42.0382 |
| 2      | 8.047         | BB   | 0.2159      | 1.70034e4    | 1240.74731   | 57.9618 |

Signal 2: DAD1 B, Sig=210,4 Ref=off

| Peak # | RetTime [min] | Type | Width [min] | Area [mAU*s] | Height [mAU] | Area %  |
|--------|---------------|------|-------------|--------------|--------------|---------|
| 1      | 6.613         | MM   | 0.2852      | 2.98195e4    | 1742.56702   | 98.0765 |
| 2      | 8.054         | MM   | 0.2145      | 584.82611    | 45.44874     | 1.9235  |

## Compound 36

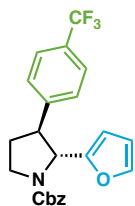

### benzyl (2*R*,3*S*)-2-(furan-2-yl)-3-(4-(trifluoromethyl)phenyl)pyrrolidine-1-carboxylate (**36**)

Following General Procedure **C1** on 0.1 mmol scale with **B10**, NiCl<sub>2</sub>•6H<sub>2</sub>O (20 mol%), BPhen (22 mol%), and boronic acid **SI-20** (3.0 equiv.). Purification by pTLC (silica, 5:1 Hexanes:EtOAc) afforded 35.0 mg (84%) of the title compound **36**.

**Physical State:** colorless oil

**<sup>1</sup>H NMR (600 MHz, CDCl<sub>3</sub>, both rotamers):** δ 7.55 (d, *J* = 8.0 Hz, 2H), 7.40 – 7.21 (m, 7H), 7.14 (s, 1H), 6.30 (s, 1H), 6.22 – 6.04 (m, 1H), 5.23 – 4.89 (m, 3H), 3.87 – 3.81 (m, 1H), 3.71 – 3.66 (m, 2H), 2.48 (s, 1H), 2.10 – 2.04 (m, 1H) ppm.

**<sup>19</sup>F NMR (400 MHz, CDCl<sub>3</sub>):** δ -62.75 ppm.

**<sup>13</sup>C NMR (151 MHz, CDCl<sub>3</sub>, both rotamers)** δ 154.7, 154.1, 153.5, 145.9, 141.9, 136.8, 136.6, 129.4 (q, *J*<sub>C-F</sub> = 32.5 Hz), 128.7, 128.6, 128.4, 128.0, 127.8, 127.4, 125.8 (q, *J*<sub>C-F</sub> = 3.7 Hz), 124.2 (q, *J*<sub>C-F</sub> = 271.8 Hz), 110.5, 110.4, 107.5, 106.9, 67.2, 61.4, 50.52, 5.19, 46.3, 45.9, 32.2, 31.3 ppm.

**HRMS (ESI-TOF):** calc'd for C<sub>23</sub>H<sub>21</sub>F<sub>3</sub>NO<sub>3</sub> [M+H]<sup>+</sup>: 416.1474; found 416.1469.

**TLC:** R<sub>f</sub> = 0.3 (8:1 Hexanes:EtOAc).

**[α]<sub>D</sub><sup>20</sup>** = -57.0 (*c* = 1.0, CHCl<sub>3</sub>).

**Chiral HPLC:** Chiralpak IC, 4.6 x 250 mm; 10/90 *i*PrOH/hexanes, 1 mL/min, 254 nm; *t*<sub>R</sub> (minor) = 9.5 min, *t*<sub>R</sub> (major) = 8.5 min, 95.5% *ee*.

Racemic:

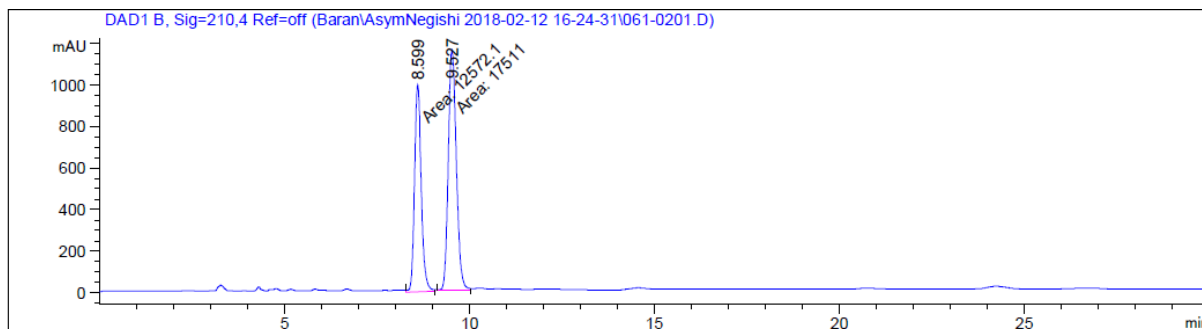

Enantioenriched **36**:

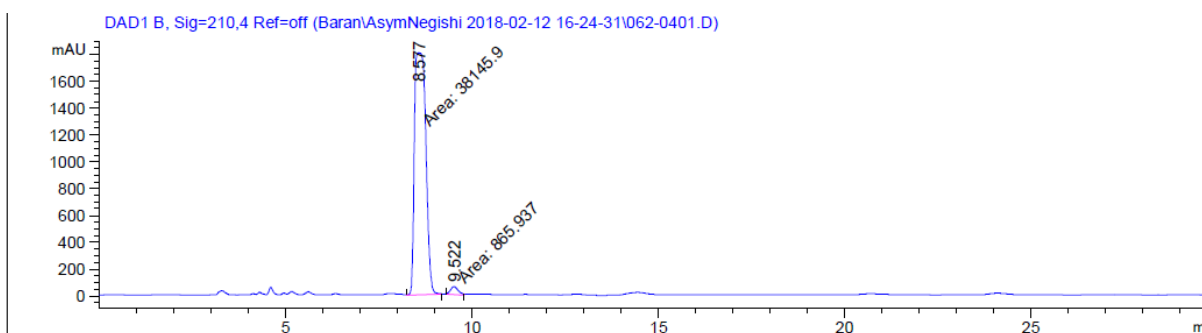

Signal 2: DAD1 B, Sig=210,4 Ref=off

| Peak # | RetTime [min] | Type | Width [min] | Area [mAU*s] | Height [mAU] | Area %  |
|--------|---------------|------|-------------|--------------|--------------|---------|
| 1      | 8.599         | MM   | 0.2103      | 1.25721e4    | 996.45453    | 41.7912 |
| 2      | 9.527         | MM   | 0.2526      | 1.75110e4    | 1155.45422   | 58.2088 |

Signal 2: DAD1 B, Sig=210,4 Ref=off

| Peak # | RetTime [min] | Type | Width [min] | Area [mAU*s] | Height [mAU] | Area %  |
|--------|---------------|------|-------------|--------------|--------------|---------|
| 1      | 8.577         | MM   | 0.3528      | 3.81459e4    | 1802.20972   | 97.7803 |
| 2      | 9.522         | MM   | 0.2449      | 865.93713    | 58.93631     | 2.2197  |



## Compound 37

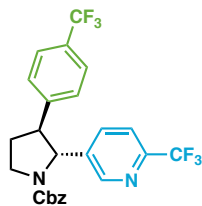

### benzyl (2*R*,3*S*)-3-(4-(trifluoromethyl)phenyl)-2-(6-(trifluoromethyl)pyridin-3-yl)pyrrolidine-1-carboxylate (**37**)

Following General Procedure **C1** on 0.1 mmol scale with **B10**, NiCl<sub>2</sub>•6H<sub>2</sub>O (20 mol%), BPhen (22 mol%), and boronic acid **SI-14** (3.0 equiv.). Purification by pTLC (silica, 2:1 Hexanes:EtOAc) afforded 35.0 mg (71%) of the title compound **37**.

**Physical State:** colorless oil

**<sup>1</sup>H NMR (600 MHz, CDCl<sub>3</sub>, both rotamers):** δ 8.48 – 8.35 (m, 1H), 7.63 – 7.45 (m, 4H), 7.43 – 7.33 (m, 2H), 7.27 – 7.14 (m, 4H), 6.81 (d, *J* = 7.5 Hz, 1H), 5.25 – 4.75 (m, 3H), 4.12 – 4.04 (m, 1H), 3.80 – 3.76 (m, 1H), 3.30 (dt, *J* = 9.6, 7.0 Hz, 1H), 2.39 – 2.32 (m, 1H), 2.24 – 2.20 (m, 1H) ppm.

**<sup>19</sup>F NMR (400 MHz, CDCl<sub>3</sub>):** δ -62.88, 67.96 ppm.

**<sup>13</sup>C NMR (151 MHz, CDCl<sub>3</sub>, both rotamers)** δ 163.0, 155.0, 154.5, 148.0, 147.4 (q, *J*<sub>C-F</sub> = 34.8 Hz), 143.6, 143.3, 141.6, 140.8, 136.4, 135.7, 134.8, 134.5, 130.2 (q, *J*<sub>C-F</sub> = 31.7 Hz), 128.7, 128.5, 128.4, 128.3, 128.2, 128.0, 127.9, 126.1 (q, *J*<sub>C-F</sub> = 3.8 Hz), 124.4, 124.3, 124.0 (q, *J*<sub>C-F</sub> = 271.8 Hz), 121.6 (q, *J*<sub>C-F</sub> = 273.3 Hz), 120.4, 67.6, 66.2, 55.6, 54.4, 47.7, 47.3, 33.1, 32.4 ppm.

**HRMS (ESI-TOF):** calc'd for C<sub>25</sub>H<sub>21</sub>F<sub>6</sub>N<sub>2</sub>O<sub>2</sub> [M+H]<sup>+</sup>: 495.1507; found 495.1507.

**TLC:** R<sub>f</sub> = 0.2 (3:1 Hexanes:EtOAc).

**[α]<sub>D</sub><sup>20</sup>** = -39.7 (*c* = 1.0, CHCl<sub>3</sub>).

**Chiral HPLC:** Chiralpak IC, 4.6 x 250 mm; 20/80 *i*PrOH/hexanes, 1 mL/min, 254 nm; *t*<sub>R</sub> (minor) = 6.3 min, *t*<sub>R</sub> (major) = 7.8 min, 98% *ee*.

Racemic:

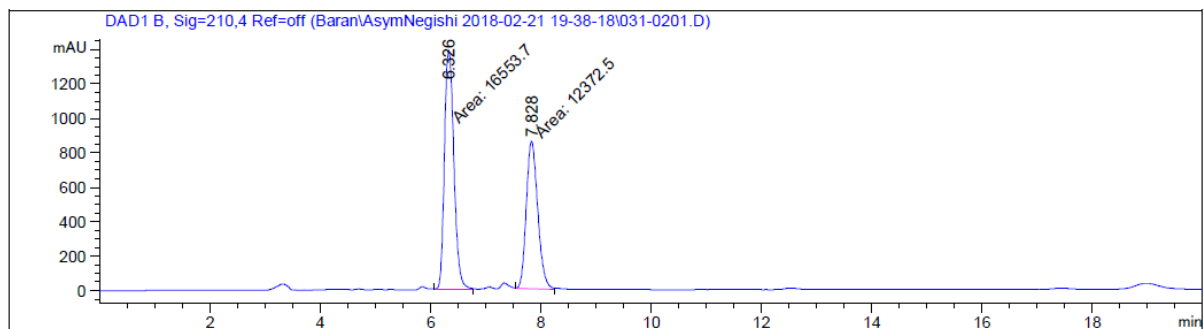

Enantioenriched **37**:

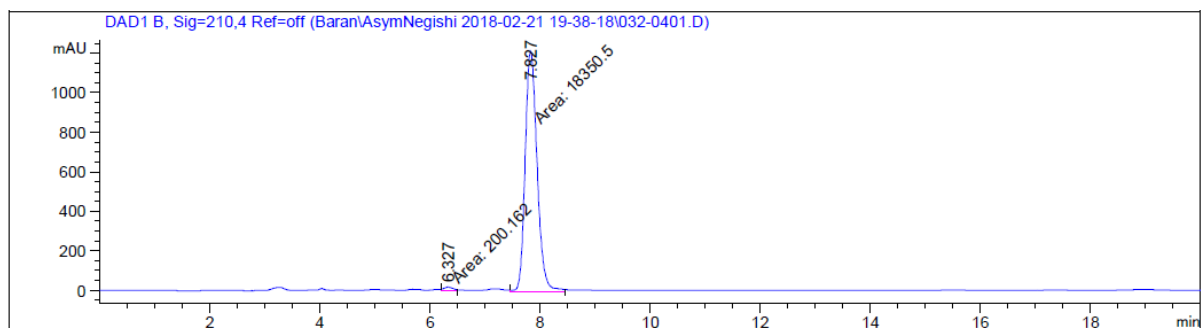

Signal 2: DAD1 B, Sig=210,4 Ref=off

| Peak # | RetTime [min] | Type | Width [min] | Area [mAU*s] | Height [mAU] | Area %  |
|--------|---------------|------|-------------|--------------|--------------|---------|
| 1      | 6.326         | MM   | 0.1989      | 1.65537e4    | 1387.16516   | 57.2273 |
| 2      | 7.828         | MM   | 0.2408      | 1.23725e4    | 856.41144    | 42.7727 |

Signal 2: DAD1 B, Sig=210,4 Ref=off

| Peak # | RetTime [min] | Type | Width [min] | Area [mAU*s] | Height [mAU] | Area %  |
|--------|---------------|------|-------------|--------------|--------------|---------|
| 1      | 6.327         | MM   | 0.1934      | 200.16231    | 17.25369     | 1.0790  |
| 2      | 7.827         | MM   | 0.2517      | 1.83505e4    | 1215.01892   | 98.9210 |

## Compound 38

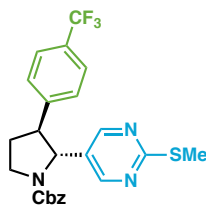

### benzyl (2*R*,3*S*)-2-(2-(methylthio)pyrimidin-5-yl)-3-(4-(trifluoromethyl)phenyl)pyrrolidine-1-carboxylate (**38**)

Following General Procedure **C1** on 0.1 mmol scale with **B10**, NiCl<sub>2</sub>•6H<sub>2</sub>O (20 mol%), BPhen (22 mol%), and boronic acid **SI-18** (3.0 equiv.). Purification by pTLC (silica, 2:1 Hexanes:EtOAc) afforded 40.2 mg (85%) of the title compound **38**.

**Physical State:** colorless oil

**<sup>1</sup>H NMR (600 MHz, CDCl<sub>3</sub>, both rotamers):** δ 8.22 (s, 1H), 8.11 (s, 1H), 7.50 (d, *J* = 7.8 Hz, 2H), 7.31 – 7.19 (m, 6H), 6.86 (s, 1H), 5.14 – 4.82 (m, 2H), 4.72 – 4.57 (m, 1H), 4.00 – 3.93 (m, 1H), 3.66 (d, *J* = 8.9 Hz, 1H), 3.23 (dt, *J* = 9.6, 6.8 Hz, 1H), 2.47 (s, 3H), 2.32 – 2.24 (m, 1H), 2.13 – 2.09 (m, 1H) ppm.

**<sup>19</sup>F NMR (400 MHz, CDCl<sub>3</sub>):** δ -62.87 ppm.

**<sup>13</sup>C NMR (151 MHz, CDCl<sub>3</sub>, both rotamers)** δ 172.0, 155.3, 154.8, 154.7, 154.5, 143.5, 143.2, 136.4, 135.9, 130.5, 130.1 (q, *J*<sub>C-F</sub> = 32.6 Hz), 129.7, 128.7, 128.6, 128.3, 128.2, 128.0, 127.8, 126.1 (q, *J*<sub>C-F</sub> = 3.7 Hz), 124.0 (q, *J*<sub>C-F</sub> = 271.8 Hz), 67.6, 64.4, 55.3, 54.1, 47.6, 47.2, 33.00, 32.2, 14.2 ppm.

**HRMS (ESI-TOF):** calc'd for C<sub>24</sub>H<sub>23</sub>F<sub>3</sub>N<sub>3</sub>O<sub>2</sub>S [M+H]<sup>+</sup>: 474.1463; found 474.1465.

**TLC:** R<sub>f</sub> = 0.2 (2:1 Hexanes:EtOAc).

**[α]<sub>D</sub><sup>20</sup>** = -65.0 (*c* = 1.0, CHCl<sub>3</sub>).

**Chiral HPLC:** Chiralpak IC, 4.6 x 250 mm; 30/70 *i*PrOH/hexanes, 1 mL/min, 254 nm; *t*<sub>R</sub> (minor) = 9.0 min, *t*<sub>R</sub> (major) = 24.4 min, 98.5% *ee*.

Racemic:

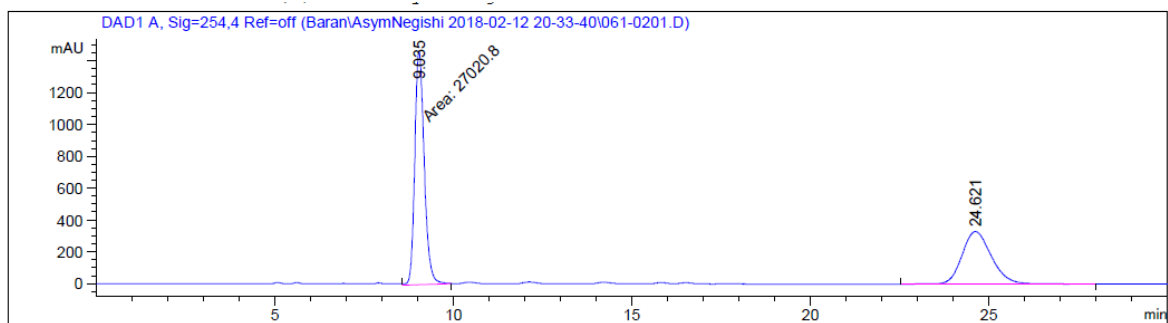

Enantioenriched **38**:

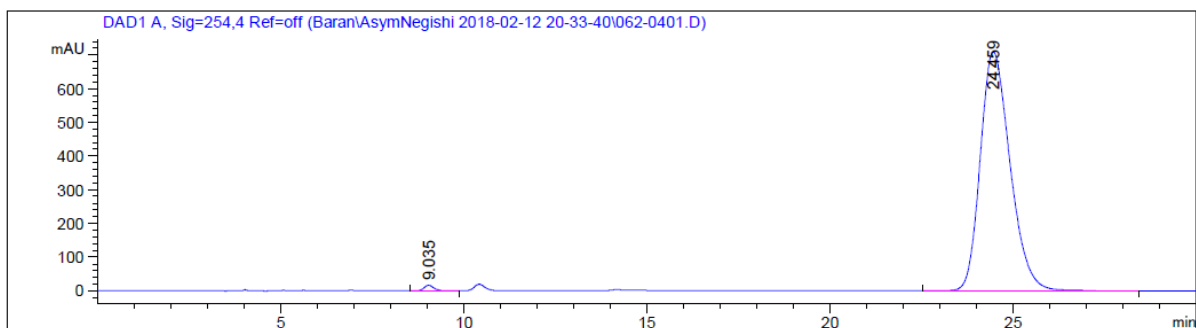

Signal 1: DAD1 A, Sig=254,4 Ref=off

| Peak # | RetTime [min] | Type | Width [min] | Area [mAU*s] | Height [mAU] | Area %  |
|--------|---------------|------|-------------|--------------|--------------|---------|
| 1      | 9.035         | MM   | 0.3073      | 2.70208e4    | 1465.43604   | 59.0692 |
| 2      | 24.621        | BB   | 0.8803      | 1.87235e4    | 328.85065    | 40.9308 |

Signal 1: DAD1 A, Sig=254,4 Ref=off

| Peak # | RetTime [min] | Type | Width [min] | Area [mAU*s] | Height [mAU] | Area %  |
|--------|---------------|------|-------------|--------------|--------------|---------|
| 1      | 9.035         | BB   | 0.2826      | 298.68182    | 16.23542     | 0.7392  |
| 2      | 24.459        | BB   | 0.8744      | 4.01099e4    | 708.56226    | 99.2608 |

## Compound 39

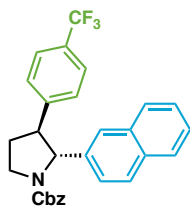

### benzyl (2*R*,3*S*)-2-(naphthalen-2-yl)-3-(4-(trifluoromethyl)phenyl)pyrrolidine-1-carboxylate (39)

Following General Procedure C1 on 0.1 mmol scale with **B10**, NiCl<sub>2</sub>•6H<sub>2</sub>O (20 mol%), BPhen (22 mol%), and boronic acid **SI-11** (3.0 equiv.). Purification by pTLC (silica, 3:1 Hexanes:EtOAc) afforded 40.1 mg (84%) of the title compound **39**.

**Physical State:** colorless oil

**<sup>1</sup>H NMR (600 MHz, CDCl<sub>3</sub>, both rotamers):** δ 7.86 – 7.78 (m, 2H), 7.74 – 7.70 (m, 1H), 7.59 – 7.32 (m, 7H), 7.26 (s, 3H), 7.09 – 6.83 (m, 2H), 6.63 (d, *J* = 5.7 Hz, 1H), 5.25 – 4.84 (m, 3H), 4.06 (d, *J* = 51.2 Hz, 1H), 3.88 (s, 1H), 3.45 (t, *J* = 8.1 Hz, 1H), 2.41 – 2.36 (m, 1H), 2.24 – 2.11 (m, 1H) ppm.

**<sup>19</sup>F NMR (400 MHz, CDCl<sub>3</sub>):** δ -62.75 ppm.

**<sup>13</sup>C NMR (151 MHz, CDCl<sub>3</sub>, both rotamers)** δ 162.8, 155.0, 154.8, 145.5, 145.2, 140.2, 139.5, 136.9, 136.2, 133.4, 132.9, 129.5 (q, *J*<sub>C-F</sub> = 31.7 Hz), 128.7, 128.2, 128.1, 128.0, 127.9, 127.8, 127.6, 127.4, 126.3, 125.9, 125.8 (q, *J*<sub>C-F</sub> = 3.8 Hz), 124.7, 124.6, 124.2 (q, *J*<sub>C-F</sub> = 271.8 Hz), 123.9, 68.6, 67.1, 55.2, 54.0, 47.7, 47.1, 32.6, 31.9 ppm.

**HRMS (ESI-TOF):** calc'd for C<sub>29</sub>H<sub>25</sub>F<sub>3</sub>NO<sub>2</sub> [M+H]<sup>+</sup>: 476.1837; found 476.1832.

**TLC:** R<sub>f</sub> = 0.3 (8:1 Hexanes:EtOAc).

**[α]<sub>D</sub><sup>20</sup>** = -31.0 (*c* = 1.0, CHCl<sub>3</sub>).

**Chiral HPLC:** Chiralpak IC, 4.6 x 250 mm; 10/90 *i*PrOH/hexanes, 1 mL/min, 210 nm; *t*<sub>R</sub> (minor) = 12.7 min, *t*<sub>R</sub> (major) = 10.8 min, 97% *ee*.

Racemic:

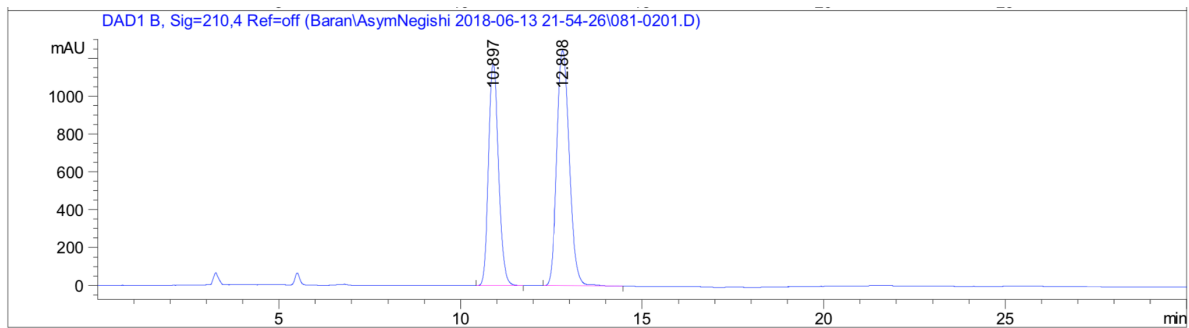

Enantioenriched 39:

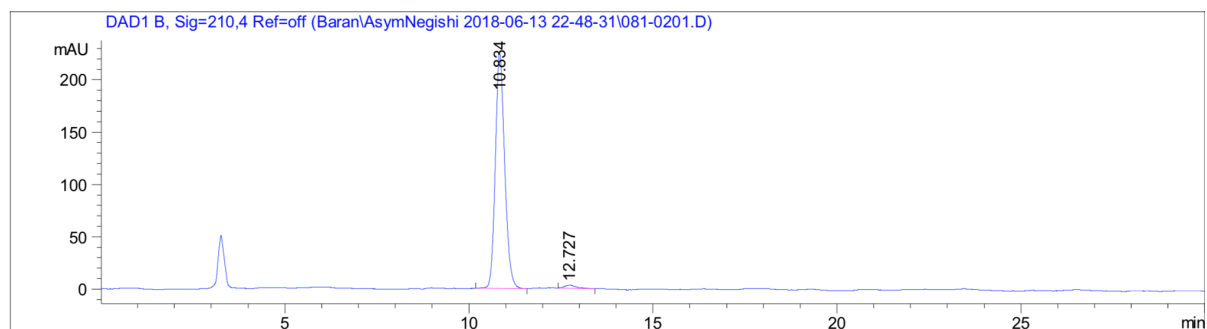

Signal 2: DAD1 B, Sig=210,4 Ref=off

| Peak # | RetTime [min] | Type | Width [min] | Area [mAU*s] | Height [mAU] | Area %  |
|--------|---------------|------|-------------|--------------|--------------|---------|
| 1      | 10.897        | BB   | 0.2994      | 2.25021e4    | 1175.09668   | 42.8811 |
| 2      | 12.808        | BB   | 0.3814      | 2.99735e4    | 1242.72571   | 57.1189 |

Signal 2: DAD1 B, Sig=210,4 Ref=off

| Peak # | RetTime [min] | Type | Width [min] | Area [mAU*s] | Height [mAU] | Area %  |
|--------|---------------|------|-------------|--------------|--------------|---------|
| 1      | 10.834        | BB   | 0.2704      | 3997.51758   | 225.96608    | 98.5336 |
| 2      | 12.727        | BB   | 0.2506      | 59.49097     | 2.90896      | 1.4664  |

## Compound 40

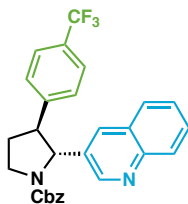

### benzyl (2*R*,3*S*)-2-(quinolin-3-yl)-3-(4-(trifluoromethyl)phenyl)pyrrolidine-1-carboxylate (40)

Following General Procedure **C1** on 0.1 mmol scale with **B10**, NiCl<sub>2</sub>•6H<sub>2</sub>O (20 mol%), BPhen (22 mol%), and boronic acid **SI-16** (3.0 equiv.). Purification by pTLC (silica, 2:1 Hexanes: EtOAc) afforded 24.0 mg (50%) of the title compound **40**.

**Physical State:** colorless oil

**<sup>1</sup>H NMR (600 MHz, CDCl<sub>3</sub>, both rotamers):** δ 8.74 – 8.64 (m, 1H), 8.10 (d, *J* = 8.5 Hz, 1H), 7.85 – 7.63 (m, 3H), 7.56 (d, *J* = 8.1 Hz, 3H), 7.44 – 7.23 (m, 4H), 7.08 – 6.68 (m, 3H), 5.21 – 4.83 (m, 3H), 4.13 – 4.06 (m, 1H), 3.87 (s, 1H), 3.47 – 3.44 (m, 1H), 2.43 – 2.38 (m, 1H), 2.22 (s, 1H) ppm.

**<sup>19</sup>F NMR (400 MHz, CDCl<sub>3</sub>):** δ -62.81 ppm.

**<sup>13</sup>C NMR (151 MHz, CDCl<sub>3</sub>, both rotamers)** δ 154.8, 149.2, 147.8, 144.4, 144.1, 136.7, 135.9, 135.4, 134.6, 132.8, 132.5, 129.9 (q, *J*<sub>C-F</sub> = 33.2Hz), 129.4, 129.4, 128.7, 128.2, 127.9, 127.7, 127.0, 126.0 (q, *J*<sub>C-F</sub> = 3.7Hz), 124.1 (q, *J*<sub>C-F</sub> = 271.8 Hz), 67.4, 66.7, 55.4, 54.3, 47.7, 47.3, 32.9, 32.2 ppm.

**HRMS (ESI-TOF):** calc'd for C<sub>28</sub>H<sub>24</sub>F<sub>3</sub>N<sub>2</sub>O<sub>2</sub> [M+H]<sup>+</sup>: 477.1790; found 477.1788.

**TLC:** R<sub>f</sub> = 0.2 (2:1 Hexanes:EtOAc).

**[α]<sub>D</sub><sup>20</sup>** = -11.0 (*c* = 1.0, CHCl<sub>3</sub>).

**Chiral HPLC:** Chiralpak IC, 4.6 x 250 mm; 30/70 *i*PrOH/hexanes, 1 mL/min, 254 nm; *t*<sub>R</sub> (minor) = 9.7 min, *t*<sub>R</sub> (major) = 22.6 min, 98.5% *ee*.

Racemic:

Additional Info : Peak(s) manually integrated

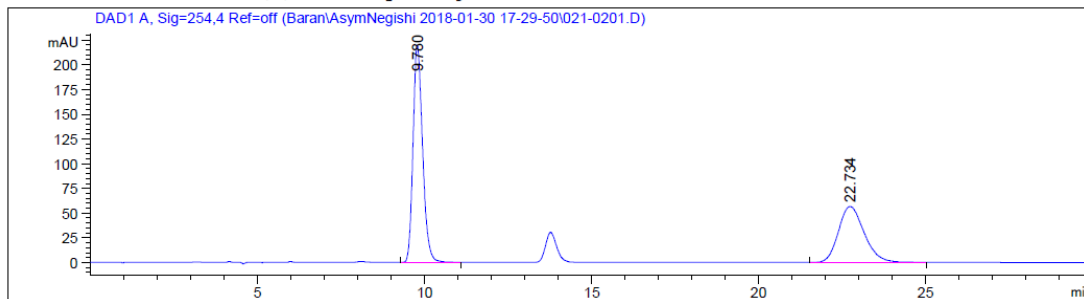

Enantioenriched 40:

Additional Info : Peak(s) manually integrated

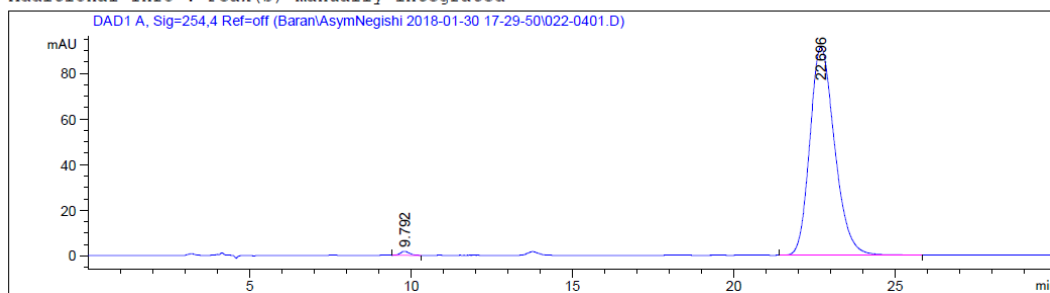

Signal 1: DAD1 A, Sig=254,4 Ref=off

| Peak # | RetTime [min] | Type | Width [min] | Area [mAU*s] | Height [mAU] | Area %  |
|--------|---------------|------|-------------|--------------|--------------|---------|
| 1      | 9.780         | BB   | 0.3060      | 4364.56104   | 219.45813    | 59.0228 |
| 2      | 22.734        | BB   | 0.8259      | 3030.14307   | 56.66148     | 40.9772 |

Signal 1: DAD1 A, Sig=254,4 Ref=off

| Peak # | RetTime [min] | Type | Width [min] | Area [mAU*s] | Height [mAU] | Area %  |
|--------|---------------|------|-------------|--------------|--------------|---------|
| 1      | 9.792         | BB   | 0.3034      | 33.80537     | 1.73459      | 0.6880  |
| 2      | 22.696        | BB   | 0.8191      | 4879.43604   | 91.35440     | 99.3120 |



## Compound B11

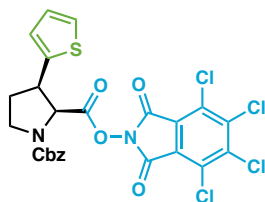

### 1-benzyl 2-(4,5,6,7-tetrachloro-1,3-dioxoisindolin-2-yl) (2*S*,3*R*)-3-(thiophen-2-yl)pyrrolidine-1,2-dicarboxylate (B11)

Following General Procedure **B** on 1.03 mmol scale with **A8**. Purification by flash column chromatography (silica, 5:1 Hexanes:EtOAc) afforded 517 mg (79%) of the title compound **B11**.

**Physical State:** yellow oil.

**<sup>1</sup>H NMR (600 MHz, CDCl<sub>3</sub>, both rotamers):** δ 7.47 – 7.39 (m, 2H), 7.38 – 7.33 (m, 2H), 7.33 – 7.25 (m, 2H), 7.11 (t, *J* = 4.6 Hz, 1H), 7.07 – 7.03 (m, 1H), 5.45 – 4.94 (m, 3H), 4.09 – 3.99 (m, 1H), 3.96 – 3.87 (m, 1H), 3.66 – 3.58 (m, 1H), 2.68 (d, *J* = 17.6 Hz, 1H), 2.43 (d, *J* = 18.2 Hz, 1H) ppm.

**<sup>13</sup>C NMR (151 MHz, CDCl<sub>3</sub>, both rotamers):** δ 166.6, 166.5, 156.6, 156.6, 154.5, 153.99, 141.0, 140.9, 137.2, 137.0, 136.5, 136.4, 130.4, 130.4, 128.6, 128.6, 128.5, 128.3, 128.2, 128.2, 127.6, 126.3, 125.2, 124.7, 124.7, 67.8, 67.7, 62.8, 62.7, 46.1, 45.8, 43.5, 42.6, 30.3, 29.2 ppm.

**HRMS (ESI-TOF):** calc'd for C<sub>25</sub>H<sub>17</sub>Cl<sub>4</sub>N<sub>2</sub>O<sub>6</sub>S [M+H]<sup>+</sup>: 612.9561; found 612.9562.

**TLC:** R<sub>f</sub> = 0.3 (4:1 Hexanes:EtOAc).

**[α]<sub>D</sub><sup>20</sup>** = 35.5 (*c* = 1.0, CHCl<sub>3</sub>).

**Chiral HPLC:** Chiralpak IC, 4.6 x 250 mm; 45/55 *i*PrOH/hexanes, 1 mL/min, 254 nm; *t*<sub>R</sub> (minor) = 37.1 min, *t*<sub>R</sub> (major) = 32.3 min, >99% *ee*.

Racemic:

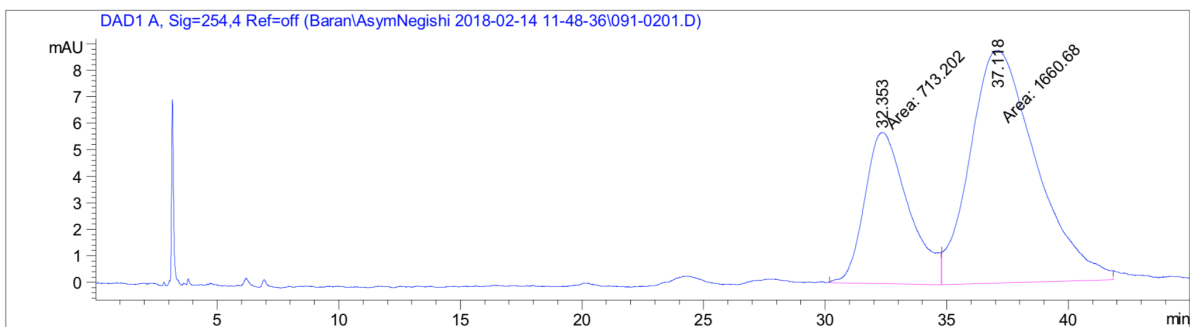

Enantioenriched B11:

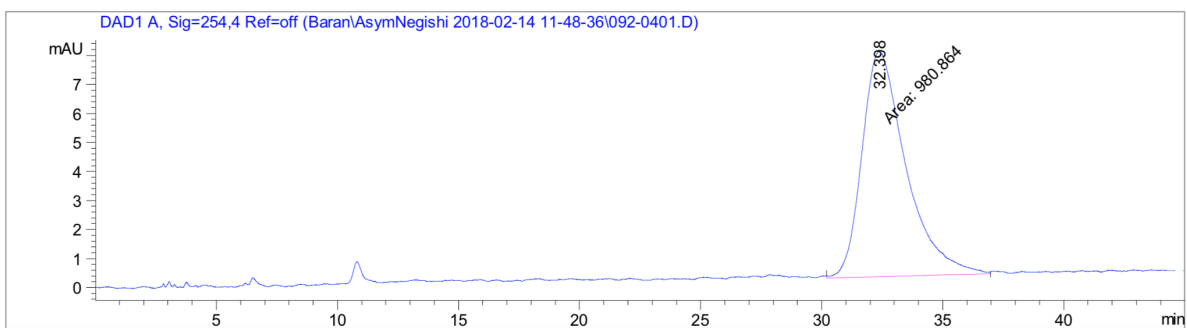

Signal 1: DAD1 A, Sig=254,4 Ref=off

| Peak # | RetTime [min] | Type | Width [min] | Area [mAU*s] | Height [mAU] | Area %  |
|--------|---------------|------|-------------|--------------|--------------|---------|
| 1      | 32.353        | MM   | 2.0849      | 713.20221    | 5.70135      | 30.0436 |
| 2      | 37.118        | MM   | 3.1551      | 1660.68494   | 8.77246      | 69.9564 |

Signal 1: DAD1 A, Sig=254,4 Ref=off

| Peak # | RetTime [min] | Type | Width [min] | Area [mAU*s] | Height [mAU] | Area %   |
|--------|---------------|------|-------------|--------------|--------------|----------|
| 1      | 32.398        | MM   | 2.1089      | 980.86444    | 7.75190      | 100.0000 |

## Compound 41

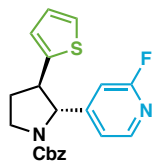

### benzyl (2*R*,3*R*)-2-(2-fluoropyridin-4-yl)-3-(thiophen-2-yl)pyrrolidine-1-carboxylate (**41**)

Following General Procedure **C1** on 0.1 mmol scale with **B11**, NiCl<sub>2</sub>•6H<sub>2</sub>O (20 mol%), BPhen (22 mol%), and boronic acid **SI-17** (3.0 equiv.). Purification by pTLC (silica, 6:1 Hexanes: EtOAc) afforded 31.3 mg (82%) of the title compound **41**.

**Physical State:** colorless oil

**<sup>1</sup>H NMR (600 MHz, CDCl<sub>3</sub>, both rotamers):** δ 8.16 – 8.06 (m, 1H), 7.36 (d, *J* = 19.3 Hz, 2H), 7.21 (d, *J* = 4.6 Hz, 3H), 6.99 – 6.88 (m, 3H), 6.80 – 6.61 (m, 2H), 5.21 – 4.75 (m, 3H), 4.02 (d, *J* = 44.9 Hz, 1H), 3.72 (q, *J* = 7.8 Hz, 1H), 3.52 (s, 1H), 2.38 – 2.33 (m, 1H), 2.21 – 2.14 (m, 1H) ppm.

**<sup>19</sup>F NMR (400 MHz, CDCl<sub>3</sub>):** δ -70.37, -70.48 ppm.

**<sup>13</sup>C NMR (151 MHz, CDCl<sub>3</sub>, both rotamers):** δ 164.3 (d, *J*<sub>C-F</sub> = 237.1Hz), 164.2 (d, *J*<sub>C-F</sub> = 240.1Hz), 158.0, 157.9, 157.2, 157.2 – 157.1 (m), 154.9, 154.6, 147.9(d, *J*<sub>C-F</sub> = 15.1Hz), 143.3, 143.0, 136.5, 135.9, 128.7, 128.5, 128.3, 128.2, 127.8, 127.1, 124.9, 124.5, 118.8, 118.7, 106.7 (q, *J*<sub>C-F</sub> = 37.8Hz), 106.6 (d, *J*<sub>C-F</sub> = 39.3Hz), 68.2, 68.1, 67.5, 50.3, 49.3, 47.4, 46.9, 33.6, 33.1 ppm.

**HRMS (ESI-TOF):** calc'd for C<sub>21</sub>H<sub>20</sub>FN<sub>2</sub>O<sub>2</sub>S [M+H]<sup>+</sup>: 383.1230; found 383.1230.

**TLC:** R<sub>f</sub> = 0.2 (4:1 Hexanes:EtOAc).

**[α]<sub>D</sub><sup>20</sup>** = -33.0 (*c* = 1.0, CHCl<sub>3</sub>).

**Chiral HPLC:** Chiralpak IC, 4.6 x 250 mm; 45/55 *i*PrOH/hexanes, 1 mL/min, 210 nm; *t*<sub>R</sub> (minor) = 8.2 min, *t*<sub>R</sub> (major) = 20.5 min, 99% *ee*.

Racemic:

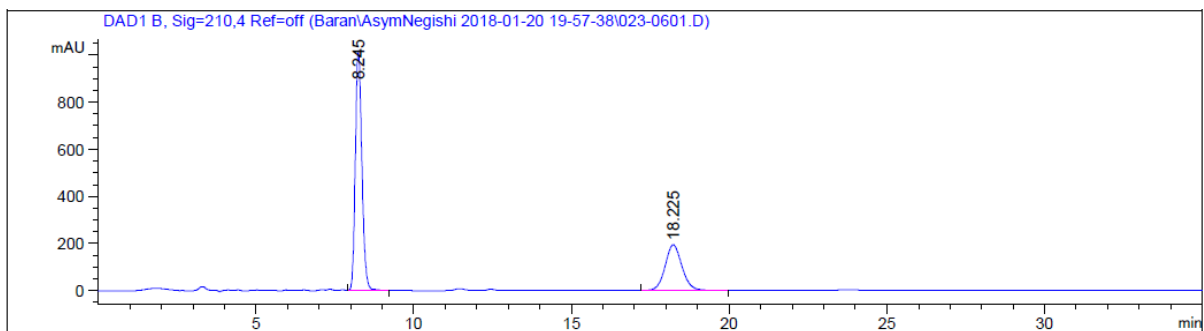

Enantioenriched 41:

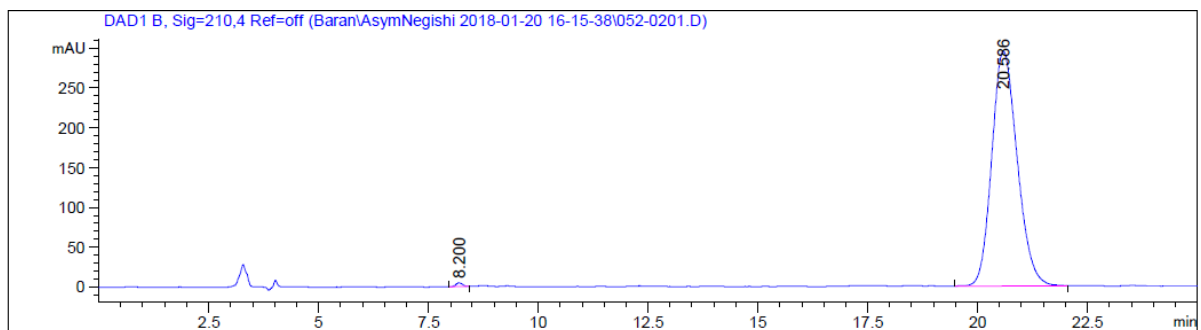

Signal 2: DAD1 B, Sig=210,4 Ref=off

| Peak # | RetTime [min] | Type | Width [min] | Area [mAU*s] | Height [mAU] | Area %  |
|--------|---------------|------|-------------|--------------|--------------|---------|
| 1      | 8.245         | BB   | 0.2246      | 1.46885e4    | 1016.64648   | 67.1379 |
| 2      | 18.225        | BB   | 0.5675      | 7189.58691   | 193.48946    | 32.8621 |

Signal 2: DAD1 B, Sig=210,4 Ref=off

| Peak # | RetTime [min] | Type | Width [min] | Area [mAU*s] | Height [mAU] | Area %  |
|--------|---------------|------|-------------|--------------|--------------|---------|
| 1      | 8.200         | BB   | 0.1642      | 49.02410     | 4.75802      | 0.4102  |
| 2      | 20.586        | BB   | 0.6036      | 1.19024e4    | 295.71375    | 99.5898 |

## Compound 42

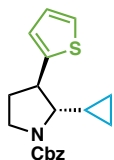

### benzyl (2*S*,3*R*)-2-cyclopropyl-3-(thiophen-2-yl)pyrrolidine-1-carboxylate (**42**)

Following General Procedure **C2** on 0.05 mmol scale with **B11**, NiCl<sub>2</sub>•glyme (20 mol%), di*t*BuBipy (25 mol%), and Zinc reagent **SI-27** (2.0 equiv.). Purification by pTLC (silica, 4:1 Hexanes:EtOAc) afforded 12.0 mg (73%) of the title compound **42**.

**Physical State:** colorless oil

**<sup>1</sup>H NMR (600 MHz, CDCl<sub>3</sub>, both rotamers):** δ 7.39 – 7.29 (m, 5H), 7.12 (dd, *J* = 5.1, 1.2 Hz, 1H), 6.89 (dd, *J* = 5.1, 3.5 Hz, 1H), 6.77 (s, 1H), 5.22 – 5.08 (m, 2H), 3.71 (s, 1H), 3.62 – 3.49 (m, 3H), 2.48 – 2.42 (m, 1H), 2.03 – 1.99 (m, 1H), 0.95 (s, 1H), 0.77 – 0.36 (m, 3H), 0.20 (s, 1H) ppm.

**<sup>13</sup>C NMR (151 MHz, CDCl<sub>3</sub>, both rotamers)** δ 155.5, 147.4, 137.1, 128.6, 128.2, 128.0, 126.8, 123.5, 123.4, 69.0, 68.7, 67.0, 46.1, 45.5, 32.7, 31.8, 16.3, 4.7, 2.2 ppm.

**HRMS (ESI-TOF):** calc'd for C<sub>19</sub>H<sub>22</sub>NO<sub>2</sub>S [M+H]<sup>+</sup>: 328.1371; found 328.1373.

**TLC:** R<sub>f</sub> = 0.3 (8:1 Hexanes:EtOAc).

**[α]<sub>D</sub><sup>20</sup>** = -36.7 (*c* = 1.0, CHCl<sub>3</sub>).

**Chiral HPLC:** Chiralpak IA, 4.6 x 250 mm; 10/90 *i*PrOH/hexanes, 1 mL/min, 254 nm; *t*<sub>R</sub> (minor) = 7.5 min, *t*<sub>R</sub> (major) = 7.0 min, >99% *ee*.

Racemic:

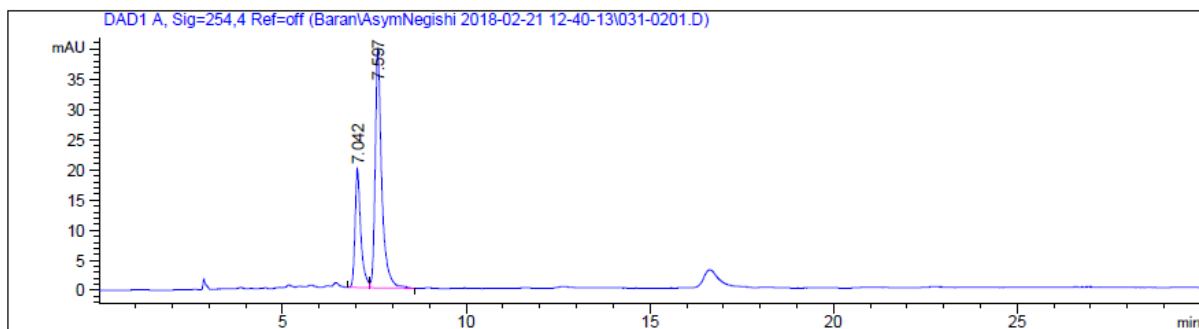

Enantioenriched 42:

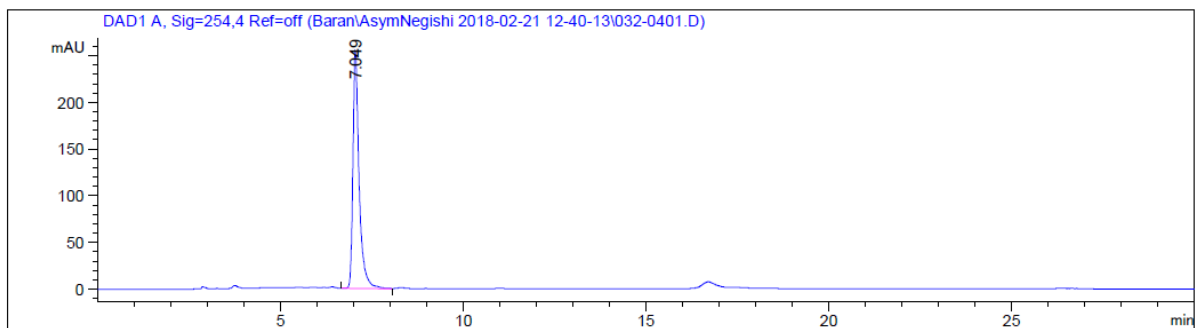

Signal 1: DAD1 A, Sig=254,4 Ref=off

| Peak # | RetTime [min] | Type | Width [min] | Area [mAU*s] | Height [mAU] | Area %  |
|--------|---------------|------|-------------|--------------|--------------|---------|
| 1      | 7.042         | BV   | 0.1649      | 217.04456    | 19.64421     | 30.4580 |
| 2      | 7.597         | VB   | 0.1850      | 495.55804    | 39.32985     | 69.5420 |

Signal 1: DAD1 A, Sig=254,4 Ref=off

| Peak # | RetTime [min] | Type | Width [min] | Area [mAU*s] | Height [mAU] | Area %   |
|--------|---------------|------|-------------|--------------|--------------|----------|
| 1      | 7.049         | BB   | 0.1764      | 3023.11938   | 254.92511    | 100.0000 |

## Compound 43

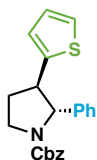

### benzyl (2*R*,3*R*)-2-phenyl-3-(thiophen-2-yl)pyrrolidine-1-carboxylate (43)

Following General Procedure C4 on 0.1 mmol scale with **B11**, NiCl<sub>2</sub>•glyme (20 mol%), di*t*BuBipy (25 mol%), and Zinc reagent **SI-35** (2.0 equiv.). Purification by pTLC (silica, 4:1 Hexanes:EtOAc) afforded 30.8 mg (85%) of the title compound **43**.

**Physical State:** colorless oil

**<sup>1</sup>H NMR (600 MHz, CDCl<sub>3</sub>, both rotamers):** δ 7.41 – 7.24 (m, 5H), 7.23 – 7.12 (m, 5H), 6.92 (dd, *J* = 5.1, 3.5 Hz, 1H), 6.86 – 6.75 (m, 2H), 5.24 – 4.85 (m, 3H), 4.08 – 3.92 (m, 1H), 3.78 (d, *J* = 10.3 Hz, 1H), 3.59 (t, *J* = 6.9 Hz, 1H), 2.45 – 2.32 (m, 1H), 2.19 – 2.08 (m, 1H) ppm.

**<sup>13</sup>C NMR (151 MHz, CDCl<sub>3</sub>, both rotamers):** δ 156.0, 155.1, 154.8, 145.2, 144.9, 142.9, 142.1, 137.0, 136.6, 129.7, 128.6, 128.3, 128.1, 127.6, 127.3, 126.9, 125.9, 124.3, 123.9, 120.6, 115.4, 69.0, 67.0, 66.9, 50.4, 49.3, 47.2, 46.7, 32.9, 32.3 ppm.

**HRMS (ESI-TOF):** calc'd for C<sub>22</sub>H<sub>22</sub>NO<sub>2</sub>S [M+H]<sup>+</sup>: 364.1371; found 364.1369.

**TLC:** R<sub>f</sub> = 0.2 (8:1 Hexanes:EtOAc).

**[α]<sub>D</sub><sup>20</sup>** = -8.0 (*c* = 1.0, CHCl<sub>3</sub>).

**Chiral HPLC:** Chiralpak IC, 4.6 x 250 mm; 20/80 *i*PrOH/hexanes, 1 mL/min, 254 nm; *t*<sub>R</sub> (minor) = 10.3 min, *t*<sub>R</sub> (major) = 8.1 min, >99% *ee*.

Racemic:

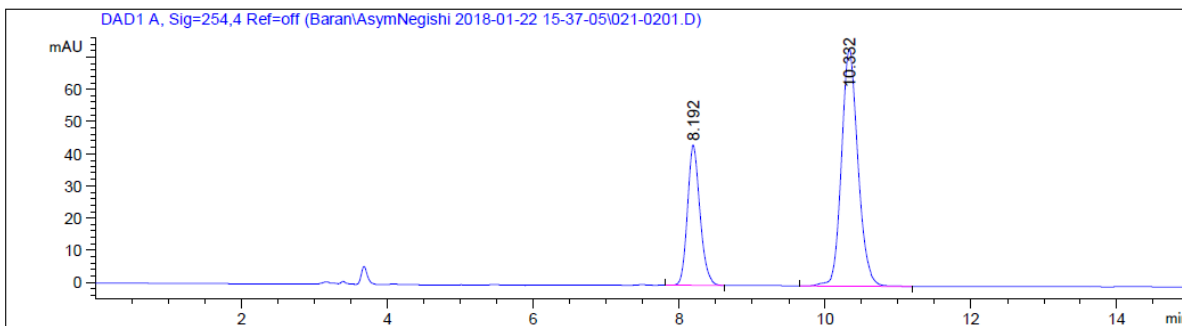

Enantioenriched 43:

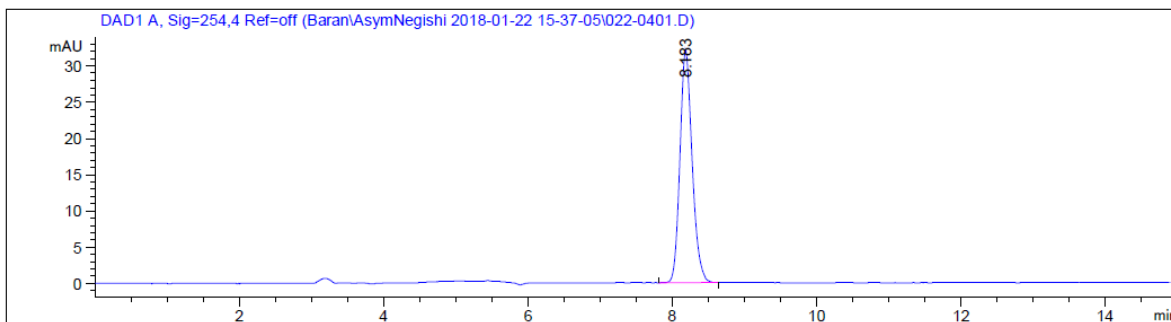

Signal 1: DAD1 A, Sig=254,4 Ref=off

| Peak # | RetTime [min] | Type | Width [min] | Area [mAU*s] | Height [mAU] | Area %  |
|--------|---------------|------|-------------|--------------|--------------|---------|
| 1      | 8.192         | BB   | 0.1841      | 523.31427    | 43.59239     | 31.0356 |
| 2      | 10.332        | BB   | 0.2442      | 1162.86108   | 73.64996     | 68.9644 |

Signal 1: DAD1 A, Sig=254,4 Ref=off

| Peak # | RetTime [min] | Type | Width [min] | Area [mAU*s] | Height [mAU] | Area %   |
|--------|---------------|------|-------------|--------------|--------------|----------|
| 1      | 8.183         | BB   | 0.1821      | 380.98270    | 32.18630     | 100.0000 |



## Compound 44

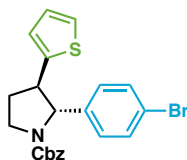

### benzyl (2R,3R)-2-(4-bromophenyl)-3-(thiophen-2-yl)pyrrolidine-1-carboxylate (44)

Following General Procedure C1 on 0.1 mmol scale with **B11**, NiCl<sub>2</sub>•6H<sub>2</sub>O (20 mol%), BPhen (22 mol%), and boronic acid **SI-6** (3.0 equiv.). Purification by pTLC (silica, 5:1 Hexanes:EtOAc) afforded 35.7 mg (81%) of the title compound **44**.

**Physical State:** colorless oil

**<sup>1</sup>H NMR (600 MHz, CDCl<sub>3</sub>, both rotamers):** δ 7.28 (d, *J* = 25.2 Hz, 2H), 7.14 – 6.86 (m, 8H), 6.80 – 6.64 (m, 2H), 5.13 – 4.63 (m, 3H), 3.94 – 3.88 (m, 1H), 3.67 (d, *J* = 9.5 Hz, 1H), 3.46 (d, *J* = 7.4 Hz, 1H), 2.28 (dtd, *J* = 13.0, 6.7, 4.8 Hz, 1H), 2.06 – 2.02 (m, 1H) ppm.

**<sup>13</sup>C NMR (151 MHz, CDCl<sub>3</sub>, both rotamers):** δ 163.0, 161.3, 155.0, 144.5, 144.3, 138.6, 137.8, 136.9, 136.4, 128.6, 128.3, 128.1, 127.8, 127.6, 127.5, 127.0, 124.4, 124.0, 115.5, 115.3, 68.5, 67.0, 50.7, 49.6, 47.3, 46.8, 33.1, 32.5, 29.8, 29.8 ppm.

**HRMS (ESI-TOF):** calc'd for C<sub>22</sub>H<sub>21</sub>BrNO<sub>2</sub>S [M+H]<sup>+</sup>: 442.0476; found 442.0478.

**TLC:** R<sub>f</sub> = 0.3 (5:1 Hexanes:EtOAc).

**[α]<sub>D</sub><sup>20</sup>** = -5.6 (*c* = 1.0, CHCl<sub>3</sub>).

**Chiral HPLC:** Chiralpak IC, 4.6 x 250 mm; 10/90 *i*PrOH/hexanes, 1 mL/min, 254 nm; *t*<sub>R</sub> (minor) = 12.2 min, *t*<sub>R</sub> (major) = 10.8 min, >99% *ee*.

Racemic:

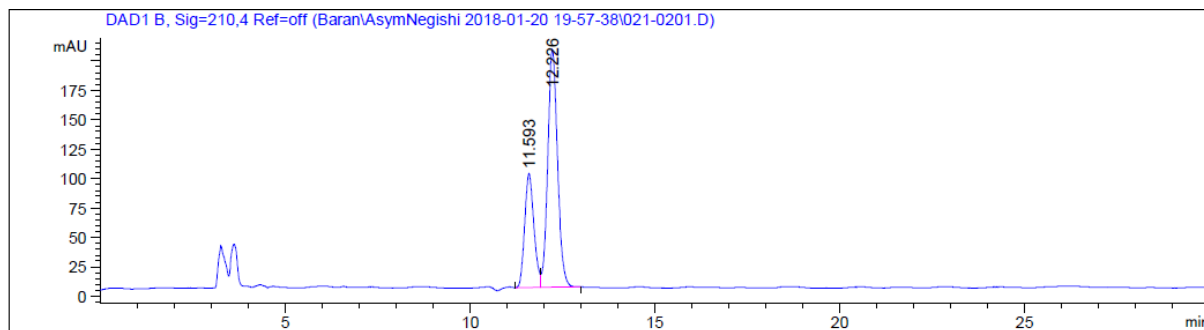

Enantioenriched 44:

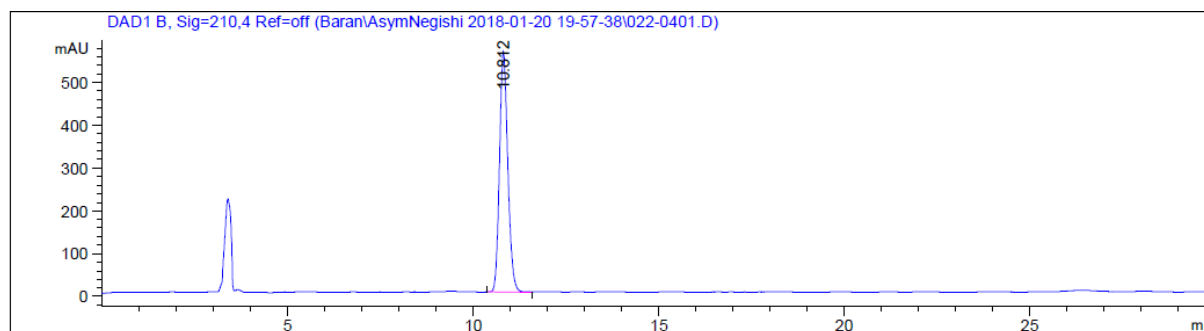

Signal 2: DAD1 B, Sig=210,4 Ref=off

| Peak # | RetTime [min] | Type | Width [min] | Area [mAU*s] | Height [mAU] | Area %  |
|--------|---------------|------|-------------|--------------|--------------|---------|
| 1      | 11.593        | BV   | 0.2695      | 1684.96509   | 96.59856     | 31.2101 |
| 2      | 12.226        | VB   | 0.2829      | 3713.80835   | 201.64282    | 68.7899 |

Signal 2: DAD1 B, Sig=210,4 Ref=off

| Peak # | RetTime [min] | Type | Width [min] | Area [mAU*s] | Height [mAU] | Area %   |
|--------|---------------|------|-------------|--------------|--------------|----------|
| 1      | 10.812        | BB   | 0.2400      | 8751.74512   | 561.01556    | 100.0000 |

## Compound B15

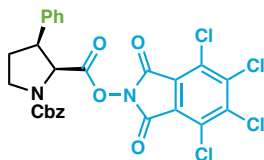

### 1-benzyl 2-(4,5,6,7-tetrachloro-1,3-dioxoisindolin-2-yl) (2*S*,3*S*)-3-phenylpyrrolidine-1,2-dicarboxylate (B15)

Following General Procedure **B** on 3.4 mmol scale with **A12**. Purification by flash column chromatography (silica, 4:1 Hexanes:EtOAc) afforded 1.73 g (84%) of the title compound **B15**.

**Physical State:** yellow oil.

**<sup>1</sup>H NMR (600 MHz, CDCl<sub>3</sub>, both rotamers):** δ 7.49 – 7.28 (m, 10H), 5.54 – 4.88 (m, 3H), 3.99 – 3.92 (m, 1H), 3.88 – 3.82 (m, 1H), 3.68 – 3.59 (m, 1H), 2.74 (p, *J* = 12.9, 11.1 Hz, 1H), 2.34 – 2.29 (m, 1H) ppm.

**<sup>13</sup>C NMR (151 MHz, CDCl<sub>3</sub>, both rotamers):** δ 166.7, 166.6, 156.6, 154.7, 154.1, 141.0, 141.0, 136.6, 136.5, 134.6, 134.5, 130.4, 130.4, 129.0, 128.9, 128.7, 128.6, 128.6, 128.5, 128.3, 128.2, 128.2, 128.2, 124.7, 124.7, 67.8, 67.7, 62.8, 62.7, 48.6, 47.5, 46.3, 46.0, 28.3, 27.3 ppm.

**HRMS (ESI-TOF):** calc'd for C<sub>27</sub>H<sub>19</sub>Cl<sub>4</sub>N<sub>2</sub>O<sub>6</sub> [M+H]<sup>+</sup>: 606.9997; found 606.9997.

**TLC:** R<sub>f</sub> = 0.3 (2:1 Hexanes:EtOAc).

**[α]<sub>D</sub><sup>20</sup>** = 49.1 (*c* = 1.0, CHCl<sub>3</sub>).

## Compound 45

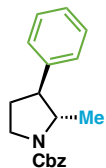

### benzyl (2*S*,3*S*)-2-methyl-3-phenylpyrrolidine-1-carboxylate (45)

Following General Procedure C2 on 0.1 mmol scale with **B15**, NiCl<sub>2</sub>•glyme (50 mol%), di*t*BuBipy (70 mol%), and Zinc reagent **SI-26** (2.0 equiv.). Purification by pTLC (silica, 4:1 Hexanes:EtOAc) afforded 14.5 mg (49%) of the title compound **45**.

**Physical State:** colorless oil

**<sup>1</sup>H NMR (600 MHz, CDCl<sub>3</sub>, both rotamers):** δ 7.41 – 7.29 (m, 7H), 7.25 – 7.18 (m, 3H), 5.24 – 5.10 (m, 2H), 3.96 – 3.90 (m, 1H), 3.81 – 3.74 (m, 1H), 3.51 – 3.38 (m, 1H), 2.96 (s, 1H), 2.27 – 2.19 (m, 1H), 1.95 (dd, *J* = 12.7, 7.6 Hz, 1H), 1.40 – 1.26 (m, 3H) ppm.

**<sup>13</sup>C NMR (151 MHz, CDCl<sub>3</sub>, both rotamers):** δ 155.2, 154.8, 142.4, 142.1, 137.2, 137.1, 128.8, 128.6, 128.6, 128.0, 128.0, 127.4, 126.9, 67.0, 66.7, 60.4, 60.1, 53.2, 52.5, 46.4, 46.1, 32.8, 32.1, 20.6, 19.4 ppm.

**TLC:** R<sub>f</sub> = 0.3 (4:1 Hexanes:Acetone).

**HRMS (ESI-TOF):** calc'd for C<sub>19</sub>H<sub>22</sub>NO<sub>2</sub> [M+H]<sup>+</sup>: 296.1651; found 296.1649.

**[α]<sub>D</sub><sup>20</sup>** = -9.8 (*c* = 0.5, CHCl<sub>3</sub>).

## Experimental Procedures and Characterization Data for Tetrahydrofuran Scaffolds (Figure 3 – c)

### Compound SI-39:

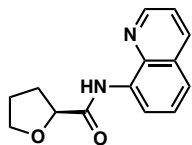

### (S)-N-(quinolin-8-yl) tetrahydrofuran-2-carboxamide (SI-39)

Following General Procedure **A3.1** on 15 mmol scale. Purification by column chromatography (gradient from 9:1 to 4:1 Hexanes:EtOAc) afforded 3 g (83%) of the title compound **SI-39**.

*Spectroscopic data are in accordance with those reported in the literature.*<sup>5</sup>

**Compound SI-40:**

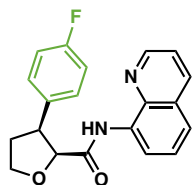

**(2S,3S)-3-(4-fluorophenyl)-N-(quinolin-8-yl) tetrahydrofuran-2-carboxamide (SI-40)**

Following General Procedure **A3.2** on 8.26 mmol scale with **SI-39**. Purification by flash column chromatography (gradient from 9:1 to 7:3 Hexanes:EtOAc), afforded 1.75 g (63%) of the title compound **SI-40**.

**Physical State:** white solid.

**m.p.:** 120-121 °C.

**<sup>1</sup>H NMR (400 MHz, CDCl<sub>3</sub>):** δ 10.55 (s, 1H), 8.87 – 8.84 (m, 1H), 8.43 (d, *J* = 7.4 Hz, 1H), 8.12 (d, *J* = 8.3 Hz, 1H), 7.50 – 7.38 (m, 3H), 7.29 – 7.19 (m, 2H), 6.80 (t, *J* = 8.7 Hz, 2H), 4.72 (d, *J* = 7.0 Hz, 1H), 4.58 (td, *J* = 8.5, 5.6 Hz, 1H), 4.18 (td, *J* = 8.8, 6.6 Hz, 1H), 3.88 (h, *J* = 4.5 Hz, 1H), 2.62 – 2.51 (m, 1H), 2.31 – 2.21 (m, 1H) ppm.

**<sup>19</sup>F NMR (376 MHz, CDCl<sub>3</sub>):** δ -116.56 ppm.

**<sup>13</sup>C NMR (151 MHz, CDCl<sub>3</sub>):** δ 168.3, 161.7 (d, *J*<sub>C-F</sub> = 244.9 Hz), 148.6, 138.9, 136.4 (d, *J*<sub>C-F</sub> = 3.2 Hz), 136.2, 133.6, 129.5 (d, *J*<sub>C-F</sub> = 7.7 Hz), 128.0, 127.2, 122.0, 121.6, 116.7, 115.12 (d, *J*<sub>C-F</sub> = 20.9 Hz), 83.9, 68.7, 47.3, 33.8 ppm.

**HRMS (ESI-TOF):** calc'd for C<sub>20</sub>H<sub>18</sub>FN<sub>2</sub>O<sub>2</sub> [M+H]<sup>+</sup>:337.1352, found: 337.1353.

**TLC:** R<sub>f</sub> = 0.25 (4:1Hexanes:EtOAc).

**[α]<sub>D</sub><sup>20</sup>** = +72.94 (*c* = 0.17, CHCl<sub>3</sub>).

**Compound SI-41:**

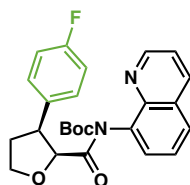

**tert-butyl ((2S,3S)-3-(4-fluorophenyl)tetrahydrofuran-2-carbonyl)(quinolin-8-yl)carbamate (SI-41)**

Following General Procedure A.3.3.1 on 1.48 mmol scale with **SI-40**. Purification by flash column chromatography (silica, 1:1 Hexanes:EtOAc) afforded 0.53 g (83%) of the title compound **SI-41**.

**Physical State:** yellow foam.

**<sup>1</sup>H NMR (400 MHz, CDCl<sub>3</sub>):** δ 8.81 (s, 1H), 8.10 (d, *J* = 8.2 Hz, 1H), 7.73 (d, *J* = 8.2 Hz, 1H), 7.43 – 7.32 (m, 5H), 7.06 (t, *J* = 8.5 Hz, 2H), 6.10 (bs, 1H), 4.44 (td, *J* = 8.2, 4.5 Hz, 1H), 4.13 (q, *J* = 8.5 Hz, 1H), 4.02 (q, *J* = 7.8 Hz, 1H), 2.63 – 2.45 (m, 1H), 2.34 – 2.15 (m, 1H), 1.12 (s, 9H) ppm.

**<sup>19</sup>F NMR (376 MHz, CDCl<sub>3</sub>):** δ -116.36 ppm.

**<sup>13</sup>C NMR (151 MHz, CDCl<sub>3</sub>):** δ 173.5, 161.9 (d, *J*<sub>C-F</sub> = 244.9 Hz), 152.0, 150.1, 143.9, 135.8 (d, *J*<sub>C-F</sub> = 9.9 Hz), 130.5, 128.6, 128.3, 127.9, 125.8, 121.3, 115.0 (d, *J*<sub>C-F</sub> = 21.5 Hz), 82.4, 82.4, 68.5, 47.2, 34.9, 27.5 ppm.

**HRMS (ESI-TOF):** calc'd for C<sub>25</sub>H<sub>26</sub>FN<sub>2</sub>O<sub>4</sub> [M+H]<sup>+</sup>: 437.1877, found: 437.1877.

**TLC:** R<sub>f</sub> = 0.26 (1:1 Hexanes:EtOAc).

**[α]<sub>D</sub><sup>20</sup>** = 4.3 (*c* = 0.94, CHCl<sub>3</sub>).

**Compound A9:**

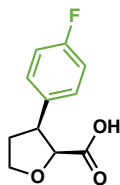

**(2S,3S)-3-(4-fluorophenyl)tetrahydrofuran-2-carboxylic acid (A9)**

Following General Procedure **A3.3.2** on 4.14 mmol scale with **SI-41** affording 0.714 g (82%) of the title compound **A9**. The crude reaction was used for the subsequent step without further purification,

**Physical State:** light-yellow solid.

**m.p.:** 161-163 °C.

**<sup>1</sup>H NMR (600 MHz, CDCl<sub>3</sub>):** δ 7.14 (dd, *J* = 8.7, 5.3 Hz, 2H), 6.95 (t, *J* = 8.7 Hz, 2H), 4.59 (d, *J* = 7.7 Hz, 1H), 4.35 (td, *J* = 8.5, 4.7 Hz, 1H), 4.02 (q, *J* = 8.0 Hz, 1H), 3.72 (q, *J* = 7.6 Hz, 1H), 2.40 (ddt, *J* = 12.6, 7.8, 3.9 Hz, 1H), 2.25 (dq, *J* = 12.6, 7.6 Hz, 1H) ppm.

**<sup>19</sup>F NMR (376 MHz, MEOD):** δ -118.66 ppm.

**<sup>13</sup>C NMR (151 MHz, CDCl<sub>3</sub>):** δ 175.1, 162.1 (d, *J*<sub>C-F</sub> = 245.4 Hz), 134.5 (d, *J*<sub>C-F</sub> = 3.2 Hz), 129.5 (d, *J*<sub>C-F</sub> = 8.2 Hz), 115.4 (d, *J*<sub>C-F</sub> = 20.9 Hz), 81.4, 68.9, 47.4, 32.4 ppm.

**HRMS (ESI-TOF):** calc'd for C<sub>11</sub>H<sub>10</sub>FO<sub>3</sub> [M-H]: 209.0614, found: 209.0614.

**TLC:** R<sub>f</sub> = 0.16 (9:1 CH<sub>2</sub>Cl<sub>2</sub>:MeOH).

**[α]<sub>D</sub><sup>20</sup>** = +25.52 (*c* = 0.38, CHCl<sub>3</sub>).



**Compound B12:**

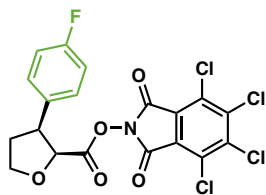

**4,5,6,7-tetrachloro-1,3-dioxisoindolin-2-yl (2S,3S)-3-(4-fluorophenyl)tetrahydrofuran-2-carboxylate (B12)**

Following General Procedure **B** on 1.90 mmol scale with **A9**. Purification by flash column chromatography (silica, 100% DCM), followed by recrystallization in CH<sub>2</sub>Cl<sub>2</sub> afforded 791 mg (85%) of the title compound **B12**.

**Physical State:** white solid.

**m.p.:** 164-165 °C.

**<sup>1</sup>H NMR (400 MHz, CDCl<sub>3</sub>):** δ 7.35 – 7.29 (m, 2H), 7.09 – 7.02 (m, 2H), 5.02 (d, *J* = 7.7 Hz, 1H), 4.45 (td, *J* = 8.4, 4.1 Hz, 1H), 4.15 (q, *J* = 8.2 Hz, 1H), 3.93 – 3.85 (m, 1H), 2.57 – 2.41 (m, 2H) ppm.

**<sup>19</sup>F NMR (376 MHz, CDCl<sub>3</sub>):** δ -115.05 ppm.

**<sup>13</sup>C NMR (151 MHz, CDCl<sub>3</sub>):** δ 166.8, 162.5 (d, *J*<sub>C-F</sub> = 243.2 Hz), 141.1, 132.0 (d, *J*<sub>C-F</sub> = 2.75 Hz), 130.5, 129.9 (d, *J*<sub>C-F</sub> = 8.3 Hz), 124.7, 115.9 (d, *J*<sub>C-F</sub> = 2.1 Hz), 80.2, 69.4, 48.2, 31.1 ppm.

**HRMS (ESI-TOF):** calc'd for C<sub>19</sub>H<sub>11</sub>Cl<sub>4</sub>FNO<sub>5</sub> [M+H]<sup>+</sup>: 491.9375, found: 491.9373.

**TLC:** R<sub>f</sub> = 0.27 (3:7 Hexanes:CH<sub>2</sub>Cl<sub>2</sub>).

**[α]<sub>D</sub><sup>20</sup>** = - 1.33 (*c* = 0.15, CHCl<sub>3</sub>).

**Chiral HPLC:** Chiralpak IA, 4.6 x 250 mm; 45/55 *i*PrOH/hexanes, 1 mL/min, 254 nm; *t*<sub>R</sub> (minor) = 33.0 min, *t*<sub>R</sub> (major) = 42.2 min, 93% *ee*.

Racemic:

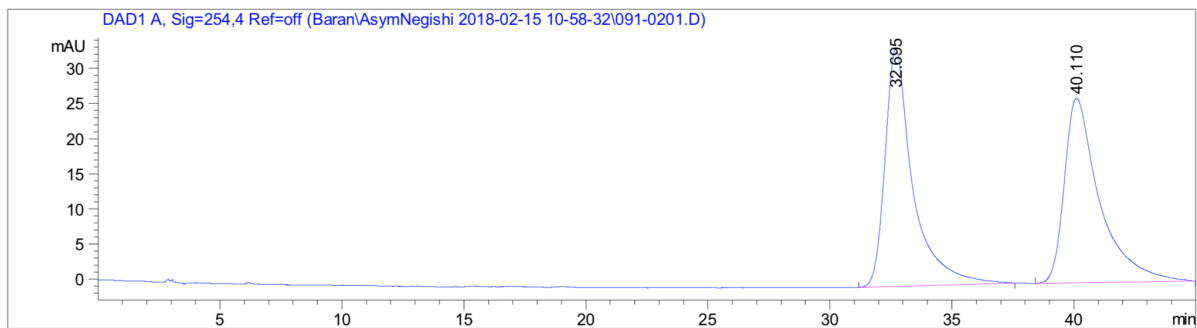

Enantioenriched B12:

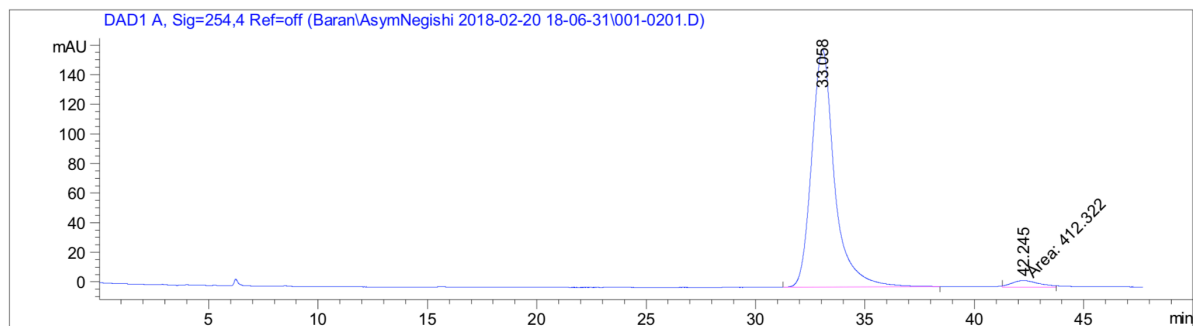

Signal 1: DAD1 A, Sig=254,4 Ref=off

| Peak # | RetTime [min] | Type | Width [min] | Area [mAU*s] | Height [mAU] | Area %  |
|--------|---------------|------|-------------|--------------|--------------|---------|
| 1      | 32.695        | BB   | 1.1441      | 2686.05127   | 33.76443     | 50.4350 |
| 2      | 40.110        | BBA  | 1.3815      | 2639.72168   | 26.33289     | 49.5650 |

Signal 1: DAD1 A, Sig=254,4 Ref=off

| Peak # | RetTime [min] | Type | Width [min] | Area [mAU*s] | Height [mAU] | Area %  |
|--------|---------------|------|-------------|--------------|--------------|---------|
| 1      | 33.058        | BB   | 1.0974      | 1.16630e4    | 160.19925    | 96.5854 |
| 2      | 42.245        | MM   | 1.5166      | 412.32156    | 4.53128      | 3.4146  |

## Compound 46

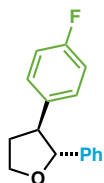

### (2*R*,3*S*)-3-(4-fluorophenyl)-2-phenyltetrahydrofuran (**46**)

Following General Procedure **C4** on 0.05 mmol scale with **B12**, NiCl<sub>2</sub>•glyme (20 mol%), di*t*BuBipy (40 mol%), and Zinc reagent **SI-35** (3.0 equiv.). Purification by pTLC (silica, 9:1 Hexanes:EtOAc) afforded 8.8 mg (73%) of the title compound **46**.

**Physical State:** colorless oil

*R<sub>f</sub>* = 0.4 (8:1 hexanes:EtOAc).

<sup>1</sup>H NMR (600 MHz, CDCl<sub>3</sub>) δ 7.32 – 7.25 (m, 3H), 7.20 (d, *J* = 6.9 Hz, 2H), 7.16 (dd, *J* = 8.5, 5.5 Hz, 2H), 7.01 (t, *J* = 8.7 Hz, 2H), 4.79 (d, *J* = 8.5 Hz, 1H), 4.31 – 4.25 (m, 2H), 3.22 (q, *J* = 8.5 Hz, 1H), 2.54 – 2.48 (m, 1H), 2.31 – 2.25 (m, 1H) ppm.

<sup>19</sup>F NMR (376 MHz, CDCl<sub>3</sub>): δ -104.79 ppm.

<sup>13</sup>C NMR (151 MHz, CDCl<sub>3</sub>) δ 161.8 (d, *J<sub>C-F</sub>* = 244.9 Hz), 141.5, 136.6 (d, *J<sub>C-F</sub>* = 3.3 Hz), 129.3 (d, *J<sub>C-F</sub>* = 8.0 Hz), 128.4, 127.6, 125.9, 115.5 (d, *J<sub>C-F</sub>* = 21.1 Hz), 87.8, 68.6, 53.7, 35.6 ppm.

**TLC:** *R<sub>f</sub>* = 0.47 (4:1 Hexanes: EtOAc).

[α]<sub>D</sub><sup>20</sup> = -5.00 (*c* = 0.1, CHCl<sub>3</sub>).

**Chiral HPLC:** Chiralpak IC, 4.6 x 250 mm; 5/95 *i*PrOH/hexanes, 0.5 mL/min, 254 nm; *t<sub>R</sub>* (minor) = 11.8 min, *t<sub>R</sub>* (major) = 13.4 min, 96% *ee*.

*Note: no HRMS could be recorded for 46*

Racemic:

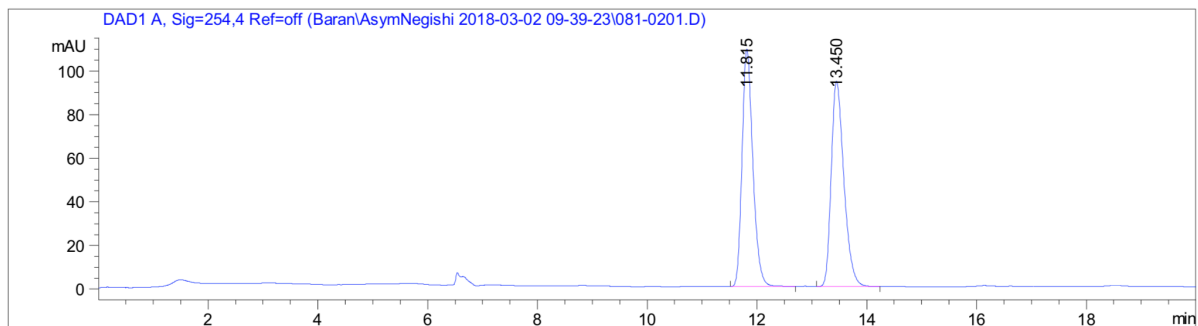

Enantioenriched 46:

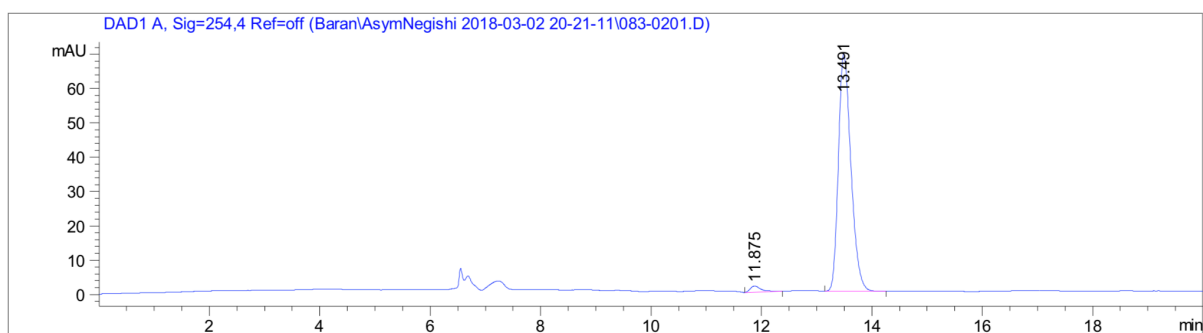

Signal 1: DAD1 A, Sig=254,4 Ref=off

| Peak # | RetTime [min] | Type | Width [min] | Area [mAU*s] | Height [mAU] | Area %  |
|--------|---------------|------|-------------|--------------|--------------|---------|
| 1      | 11.815        | BB   | 0.2094      | 1486.25330   | 108.79140    | 49.6154 |
| 2      | 13.450        | BB   | 0.2451      | 1509.29260   | 94.13255     | 50.3846 |

Signal 1: DAD1 A, Sig=254,4 Ref=off

| Peak # | RetTime [min] | Type | Width [min] | Area [mAU*s] | Height [mAU] | Area %  |
|--------|---------------|------|-------------|--------------|--------------|---------|
| 1      | 11.875        | BB   | 0.2000      | 23.21353     | 1.75830      | 2.0851  |
| 2      | 13.491        | BB   | 0.2418      | 1090.11267   | 69.17828     | 97.9149 |

## Compound 47

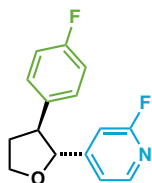

### 2-fluoro-4-((2*R*,3*S*)-3-(4-fluorophenyl)tetrahydrofuran-2-yl)pyridine (47)

Following General Procedure C1 on 0.1 mmol scale with **B12**, NiCl<sub>2</sub>•6H<sub>2</sub>O (40 mol%), BPhen (45 mol%), and boronic acid **SI-17** (3.0 equiv.). Purification by pTLC (silica, 4:1 Hexanes:EtOAc) afforded 24.1 mg (81%) of the title compound **47**.

**Physical State:** colorless oil

**<sup>1</sup>H NMR (600 MHz, CDCl<sub>3</sub>):** δ 7.95 (d, *J* = 2.4 Hz, 1H), 7.60 (td, *J* = 8.1, 2.5 Hz, 1H), 7.11 (dd, *J* = 8.5, 5.4 Hz, 2H), 7.00 (t, *J* = 8.6 Hz, 2H), 6.85 (dd, *J* = 8.5, 2.9 Hz, 1H), 4.75 (d, *J* = 8.9 Hz, 1H), 4.25 (dd, *J* = 8.4, 5.7 Hz, 2H), 3.10 (q, *J* = 8.7 Hz, 1H), 2.51 (ddt, *J* = 13.4, 8.0, 5.7 Hz, 1H), 2.33 – 2.26 (m, 1H) ppm.

**<sup>19</sup>F NMR (400 MHz, CDCl<sub>3</sub>):** δ -69.91, -115.59 ppm.

**<sup>13</sup>C NMR (151 MHz, CDCl<sub>3</sub>):** δ 163.38 (d, *J*<sub>C-F</sub> = 238.6 Hz), 162.07 (d, *J*<sub>C-F</sub> = 246.1 Hz), 145.43 (d, *J*<sub>C-F</sub> = 14.8 Hz), 138.85 (d, *J*<sub>C-F</sub> = 8.1 Hz), 135.15 (d, *J*<sub>C-F</sub> = 3.3 Hz), 134.52 (d, *J*<sub>C-F</sub> = 4.4 Hz), 129.23 (d, *J*<sub>C-F</sub> = 7.9 Hz), 115.91 (d, *J*<sub>C-F</sub> = 21.3 Hz), 109.35 (d, *J*<sub>C-F</sub> = 37.4 Hz), 85.10, 68.65, 54.03, 35.57 ppm.

**HRMS (ESI-TOF):** calc'd for C<sub>15</sub>H<sub>14</sub>F<sub>2</sub>NO [M+H]<sup>+</sup>: 262.1043; found 262.1047.

**TLC:** R<sub>f</sub> = 0.2 (4:1 Hexanes:EtOAc).

**[α]<sub>D</sub><sup>20</sup>** = -75.3 (*c* = 0.5, CHCl<sub>3</sub>).

**Chiral HPLC:** Chiralpak IC, 4.6 x 250 mm; 20/80 *i*PrOH/hexanes, 1 mL/min, 210 nm; *t*<sub>R</sub> (minor) = 8.5 min, *t*<sub>R</sub> (major) = 15.0 min, 93% *ee*.

Racemic:

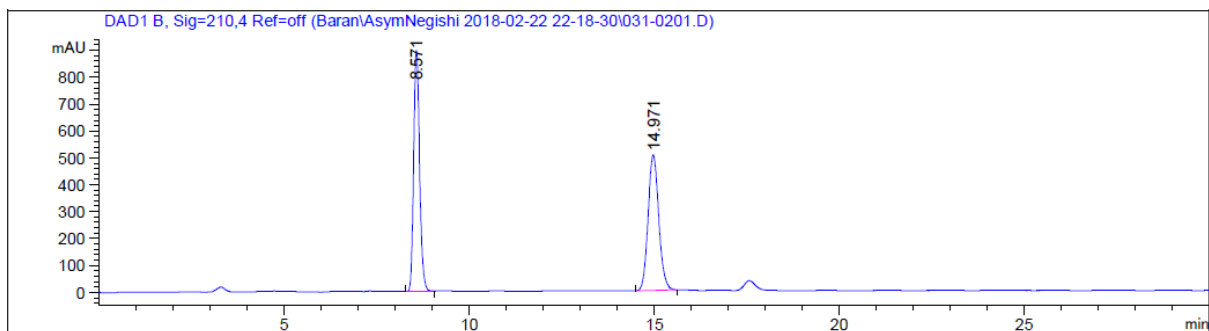

Enantioenriched 47:

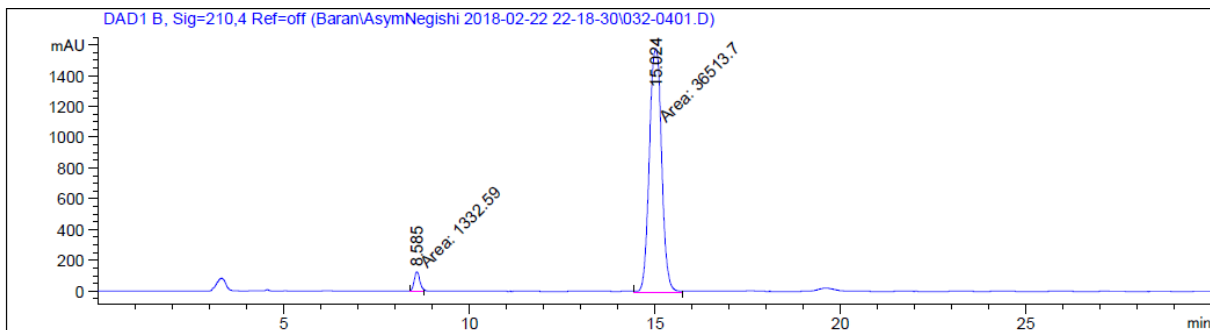

Signal 2: DAD1 B, Sig=210,4 Ref=off

| Peak # | RetTime [min] | Type | Width [min] | Area [mAU*s] | Height [mAU] | Area %  |
|--------|---------------|------|-------------|--------------|--------------|---------|
| 1      | 8.571         | BB   | 0.1713      | 9896.48340   | 892.95050    | 49.5795 |
| 2      | 14.971        | BB   | 0.3118      | 1.00644e4    | 502.20361    | 50.4205 |

Signal 2: DAD1 B, Sig=210,4 Ref=off

| Peak # | RetTime [min] | Type | Width [min] | Area [mAU*s] | Height [mAU] | Area %  |
|--------|---------------|------|-------------|--------------|--------------|---------|
| 1      | 8.585         | MM   | 0.1740      | 1332.59424   | 127.62409    | 3.5211  |
| 2      | 15.024        | MM   | 0.3852      | 3.65137e4    | 1579.67749   | 96.4789 |

## Compound 48

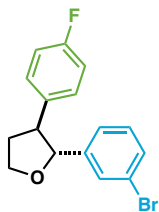

### (2*R*,3*S*)-2-(3-bromophenyl)-3-(4-fluorophenyl)tetrahydrofuran (48)

Following General Procedure C1 on 0.1 mmol scale with **B12**, NiCl<sub>2</sub>•6H<sub>2</sub>O (40 mol%), BPhen (45 mol%), and boronic acid **SI-9** (3.0 equiv.). Purification by pTLC (silica, 4:1 Hexanes:EtOAc) afforded 30.0 mg (94%) of the title compound **48**.

**Physical State:** colorless oil

**<sup>1</sup>H NMR (600 MHz, CDCl<sub>3</sub>, both rotamers)** δ 7.40 (s, 1H), 7.37 (d, *J* = 8.0 Hz, 1H), 7.15 – 7.08 (m, 3H), 7.03 – 6.97 (m, 3H), 4.73 (d, *J* = 8.4 Hz, 1H), 4.24 (dd, *J* = 8.3, 5.7 Hz, 2H), 3.14 (q, *J* = 8.6 Hz, 1H), 2.47 (tt, *J* = 12.9, 5.7 Hz, 1H), 2.30 – 2.20 (m, 1H) ppm.

**<sup>19</sup>F NMR (400 MHz, CDCl<sub>3</sub>):** δ -116.11 ppm.

**<sup>13</sup>C NMR (151 MHz, CDCl<sub>3</sub>, both rotamers)** δ 161.94 (d, *J*<sub>C-F</sub> = 245.1 Hz), 144.04, 136.10 (d, *J*<sub>C-F</sub> = 3.1 Hz), 130.71, 129.90, 129.25 (d, *J*<sub>C-F</sub> = 7.8 Hz), 128.76, 124.64, 122.68, 115.70 (d, *J*<sub>C-F</sub> = 21.4 Hz), 87.10, 68.70, 53.91, 35.62 ppm.

**HRMS (ESI-TOF):** calc'd for C<sub>16</sub>H<sub>15</sub>BrFO [M+H]<sup>+</sup>: 321.0290; found 321.0296.

**TLC:** R<sub>f</sub> = 0.4 (8:1 Hexanes:EtOAc).

**[α]<sub>D</sub><sup>20</sup>** = -108.0 (*c* = 1.0, CHCl<sub>3</sub>).

**Chiral HPLC:** Chiralpak IC, 4.6 x 250 mm; 5/95 *i*PrOH/hexanes, 0.5 mL/min, 254 nm; *t*<sub>R</sub> (minor) = 9.8 min, *t*<sub>R</sub> (major) = 11.4 min, 94% *ee*.

Racemic:

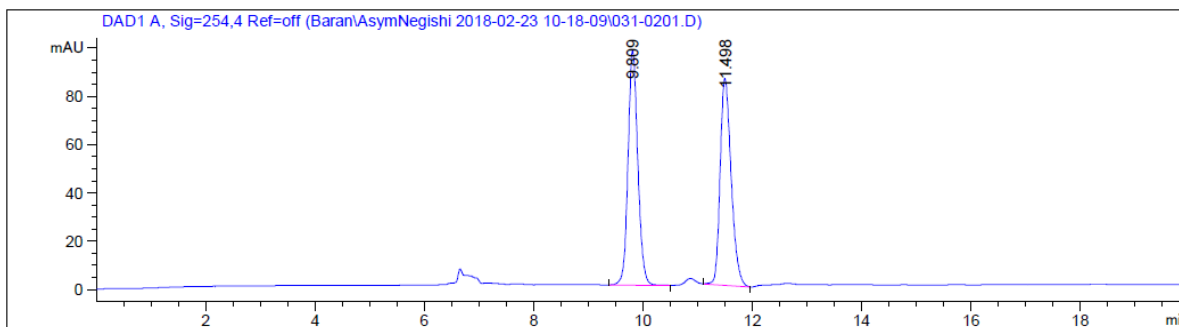

Enantioenriched 48:

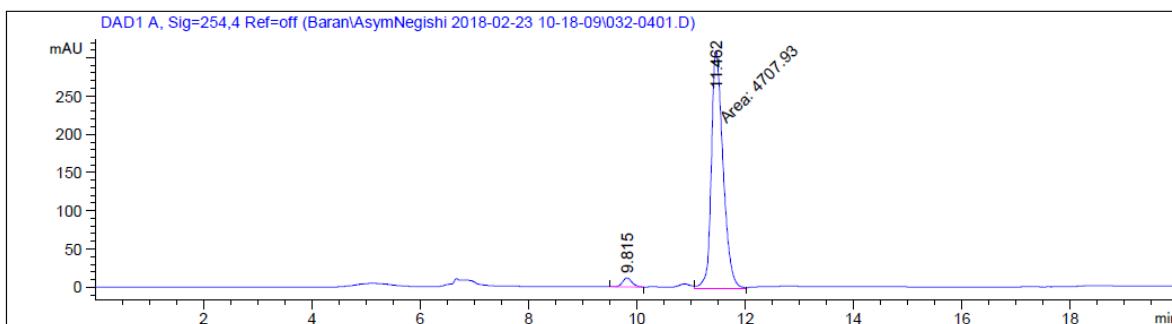

Signal 1: DAD1 A, Sig=254,4 Ref=off

| Peak # | RetTime [min] | Type | Width [min] | Area [mAU*s] | Height [mAU] | Area %  |
|--------|---------------|------|-------------|--------------|--------------|---------|
| 1      | 9.809         | BB   | 0.1886      | 1205.42395   | 97.25366     | 50.1686 |
| 2      | 11.498        | BB   | 0.2147      | 1197.31995   | 85.84238     | 49.8314 |

Signal 1: DAD1 A, Sig=254,4 Ref=off

| Peak # | RetTime [min] | Type | Width [min] | Area [mAU*s] | Height [mAU] | Area %  |
|--------|---------------|------|-------------|--------------|--------------|---------|
| 1      | 9.815         | BB   | 0.1826      | 138.62724    | 11.67001     | 2.8603  |
| 2      | 11.462        | MM   | 0.2527      | 4707.92871   | 310.55161    | 97.1397 |



## Compound 49

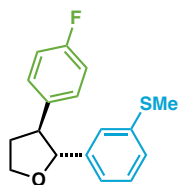

### (2R,3S)-3-(4-fluorophenyl)-2-(3-(methylthio)phenyl)tetrahydrofuran (49)

Following General Procedure C1 on 0.1 mmol scale with **B12**, NiCl<sub>2</sub>•6H<sub>2</sub>O (40 mol%), BPhen (40 mol%), and boronic acid **SI-8** (3.0 equiv.). Purification by pTLC (silica, 9:1 Hexanes:EtOAc) afforded 26.5 mg (92%) of the title compound **49**.

**Physical State:** colorless oil.

**<sup>1</sup>H NMR (400 MHz, CDCl<sub>3</sub>):** δ 7.21 – 7.05 (m, 5H), 6.99 (t, *J* = 8.7 Hz, 2H), 6.92 – 6.86 (m, 1H), 4.74 (d, *J* = 8.4 Hz, 1H), 4.30 – 4.19 (m, 2H), 3.21 – 3.11 (m, 1H), 2.53 – 2.37 (m, 4H), 2.25 (ddt, *J* = 12.5, 9.6, 8.2 Hz, 1H) ppm.

**<sup>19</sup>F NMR (376 MHz, CDCl<sub>3</sub>):** δ -116.33 ppm.

**<sup>13</sup>C NMR (126 MHz, CDCl<sub>3</sub>):** δ 161.9 (d, *J*<sub>C-F</sub> = 243.0 Hz), 142.3, 138.5, 136.5 (d, *J*<sub>C-F</sub> = 2.9 Hz), 129.3 (d, *J*<sub>C-F</sub> = 7.6 Hz), 128.8, 125.8, 123.8, 122.7, 115.6 (d, *J*<sub>C-F</sub> = 21.5 Hz), 87.6, 68.6, 53.7, 35.6, 15.8 ppm.

**HRMS (ESI-TOF):** calc'd for C<sub>17</sub>H<sub>18</sub>FOS [M+H]<sup>+</sup>: 289.1062, found: 289.1056.

**TLC:** R<sub>f</sub> = 0.26 (9:1 Hexanes:EtOAc).

**[α]<sub>D</sub><sup>20</sup>** = -69.10 (*c* = 1, CHCl<sub>3</sub>).

**Chiral SFC:** IG column (3 μm, 4.6x250 mm) under isocratic conditions [3% MeOH / CO<sub>2</sub> (4 mL/min), 1600 psi backpressure] at 30 °C. The enantiomers were detected by UV light (260 nm). *t*<sub>R</sub> (minor) = 2.06 min, *t*<sub>R</sub> (major) = 2.25 min, 93.5 % *ee*.

Racemic:

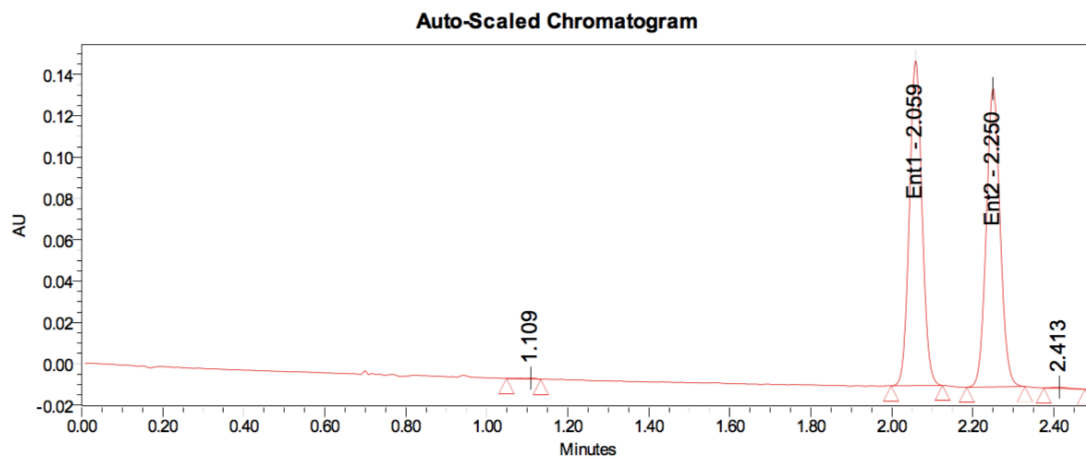

Enantioenriched 49:

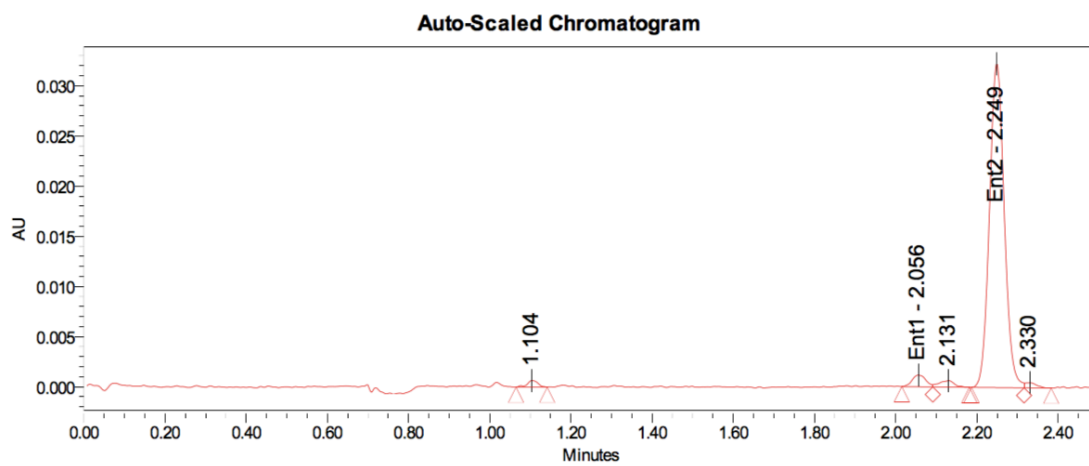

|         |       |       |        |        |        |
|---------|-------|-------|--------|--------|--------|
| KSF-465 | 49.87 | 50.13 | -0.27  | 342386 | 344211 |
| KSF-469 | 3.25  | 96.75 | -93.50 | 2741   | 81639  |

## Compound 50

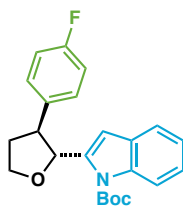

### *tert*-butyl 2-((2*R*,3*S*)-3-(4-fluorophenyl)tetrahydrofuran-2-yl)-1*H*-indole-1-carboxylate (**50**)

Following General Procedure **C1** on 0.1 mmol scale with **B12**, NiCl<sub>2</sub>•6H<sub>2</sub>O (40 mol%), BPhen (40 mol%), and boronic acid **SI-19** (5.0 equiv.). Purification by pTLC (silica, 9:1 Hexanes:EtOAc) afforded 8.1 mg (22%) of the title compound **50**.

**Physical State:** sticky oil colorless.

**<sup>1</sup>H NMR (600 MHz, CDCl<sub>3</sub>):** δ 8.08 (d, *J* = 8.3 Hz, 1H), 7.53 – 7.50 (m, 1H), 7.31 (dd, *J* = 8.7, 5.3 Hz, 2H), 7.26 (dd, *J* = 15.5, 1.4 Hz, 1H), 7.21 (td, *J* = 7.5, 1.2 Hz, 1H), 7.03 (t, *J* = 8.7 Hz, 2H), 6.69 – 6.65 (m, 1H), 5.79 (d, *J* = 2.6 Hz, 1H), 4.27 (td, *J* = 8.5, 4.2 Hz, 1H), 4.16 (q, *J* = 8.2 Hz, 1H), 3.50 (dt, *J* = 7.4, 3.7 Hz, 1H), 2.41 (dq, *J* = 12.5, 8.3 Hz, 1H), 1.93 (ddt, *J* = 11.4, 7.6, 4.1 Hz, 1H), 1.51 (s, 9H) ppm.

**<sup>19</sup>F NMR (376 MHz, CDCl<sub>3</sub>):** δ -116.97 ppm.

**<sup>13</sup>C NMR (151 MHz, CDCl<sub>3</sub>):** δ 161.8 (d, *J*<sub>C-F</sub> = 244.3 Hz), 150.4, 142.2, 139.52 (d, *J*<sub>C-F</sub> = 3.2 Hz), 137.25, 129.0, 128.9 (d, *J*<sub>C-F</sub> = 7.8 Hz), 124.1, 122.9, 120.6, 115.73 – 115.43 (m), 107.5, 84.4, 81.6, 67.8, 50.3, 33.5, 28.2 ppm.

**HRMS (ESI-TOF):** calc'd for C<sub>23</sub>H<sub>25</sub>FNO<sub>3</sub> [M+H]<sup>+</sup>: 382.1818, found: 382.1817.

**TLC:** R<sub>f</sub> = 0.42 (9:1 Hexanes:EtOAc).

**[α]<sub>D</sub><sup>20</sup>** = - 23.91 (*c* = 0.23, CHCl<sub>3</sub>).

**Chiral SFC:** IG column (3 μm, 4.6x250 mm) under isocratic conditions [3% MeOH / CO<sub>2</sub> (4 mL/min), 1600 psi backpressure] at 30 °C. The enantiomers were detected by UV light (260 nm).

*t*<sub>R</sub> (minor) = 1.59 min, *t*<sub>R</sub> (major) = 1.79 min, 91.65 % *ee*.

Racemic:

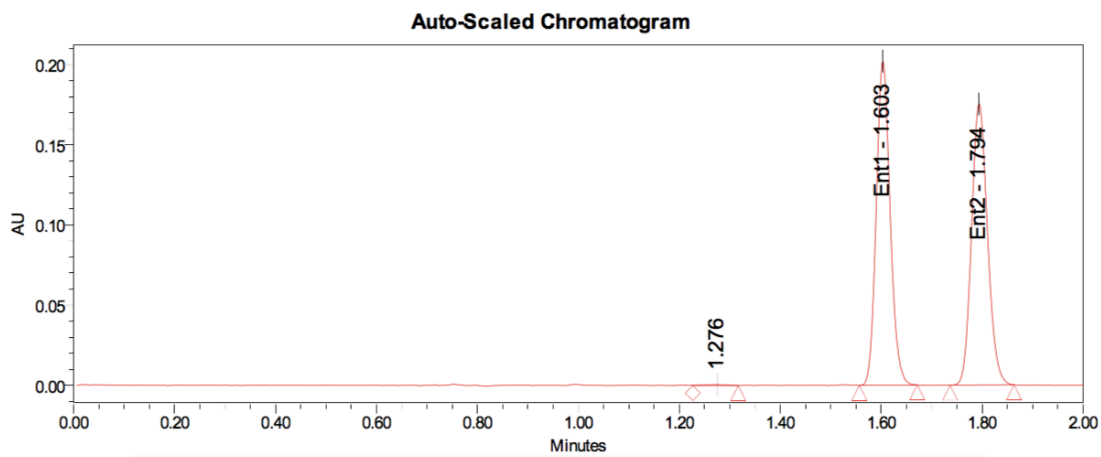

Enantioenriched **50**:

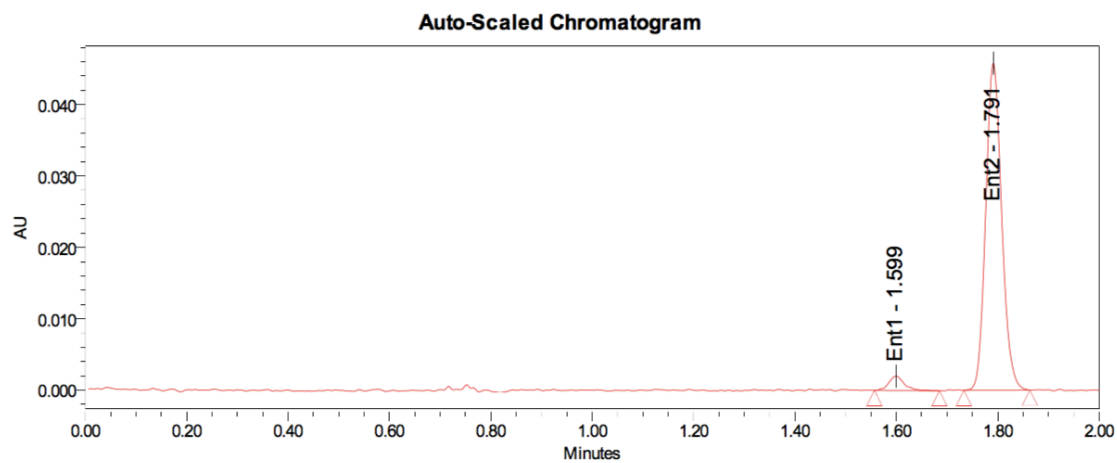

|         |       |       |        |        |        |
|---------|-------|-------|--------|--------|--------|
| KSF-466 | 50.06 | 49.94 | 0.12   | 385889 | 384972 |
| KSF-467 | 4.17  | 95.83 | -91.65 | 4364   | 100179 |

## Compound 51

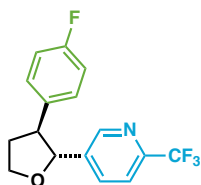

### 5-((2R,3S)-3-(4-fluorophenyl)tetrahydrofuran-2-yl)-2-(trifluoromethyl)pyridine (**51**)

Following General Procedure **C1** on 0.1 mmol scale with **B12**, NiCl<sub>2</sub>•6H<sub>2</sub>O (40 mol%), BPhen (40 mol%), and boronic acid **SI-14** (3.0 equiv.). Purification by pTLC (silica, 4:1 Hexanes:EtOAc) afforded 14.4 mg (46%) of the title compound **51**.

**Physical State:** colorless oil.

**<sup>1</sup>H NMR (600 MHz, CDCl<sub>3</sub>):** δ 8.44 (d, *J* = 2.6 Hz, 1H), 7.66 (ddd, *J* = 8.1, 2.9, 0.7 Hz, 1H), 7.59 (dd, *J* = 8.1, 1.0 Hz, 1H), 7.17 – 7.11 (m, 2H), 7.05 – 6.99 (m, 2H), 4.86 (d, *J* = 8.9 Hz, 1H), 4.32 – 4.24 (m, 2H), 3.12 (dt, *J* = 9.8, 8.0 Hz, 1H), 2.52 (dddd, *J* = 12.5, 8.0, 6.7, 4.5 Hz, 1H), 2.31 (ddt, *J* = 12.6, 9.9, 8.3 Hz, 1H) ppm.

**<sup>19</sup>F NMR (376 MHz, CDCl<sub>3</sub>):** δ -68.04, -115.30 ppm.

**<sup>13</sup>C NMR (151 MHz, CDCl<sub>3</sub>):** δ 162.2 (d, *J*<sub>C-F</sub> = 246.0 Hz), 147.8, 140.4, 135.0 (d, *J*<sub>C-F</sub> = 3.2 Hz), 134.6, 129.3 (d, *J*<sub>C-F</sub> = 8.0 Hz), 120.2 (q, *J*<sub>C-F</sub> = 2.6 Hz), 116.1 (d, *J*<sub>C-F</sub> = 21.4 Hz), 85.1, 68.9, 54.2, 35.9 ppm.

**HRMS (ESI-TOF):** calc'd for C<sub>16</sub>H<sub>14</sub>F<sub>4</sub>NO [M+H]<sup>+</sup>: 312.1012, found: 312.1017.

**TLC:** R<sub>f</sub> = 0.41 (4:1 Hexanes:EtOAc).

**[α]<sub>D</sub><sup>20</sup>** = -63.306 (*c* = 1.24, CHCl<sub>3</sub>)

**Chiral SFC:** IG column (3 μm, 4.6x250 mm) under isocratic conditions [3% MeOH / CO<sub>2</sub> (4 mL/min), 1600 psi backpressure] at 30 °C. The enantiomers were detected by UV light (260 nm). *t*<sub>R</sub> (minor) = 1.27 min, *t*<sub>R</sub> (major) = 1.41 min, 92.7 % *ee*.

Racemic:

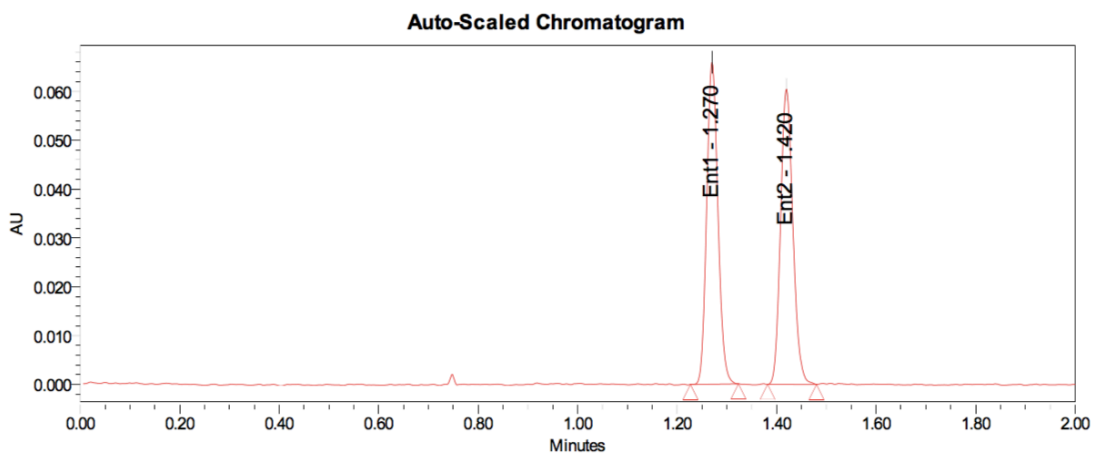

Enantioenriched **51**:

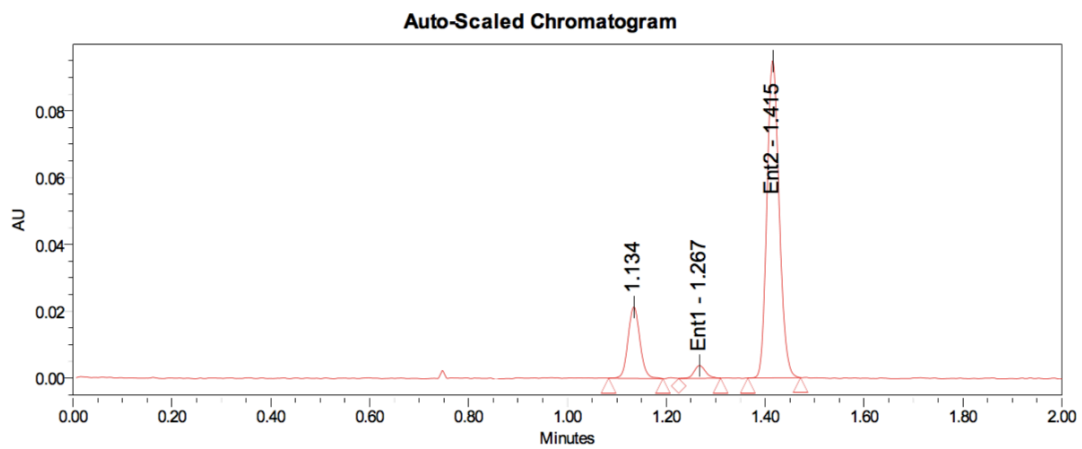

|         |       |       |        |        |        |
|---------|-------|-------|--------|--------|--------|
| KSF-464 | 49.90 | 50.10 | -0.19  | 103514 | 103919 |
| KSF-468 | 3.66  | 96.34 | -92.68 | 6208   | 163408 |

## Compound 52

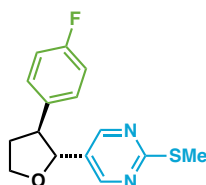

### 5-((2R,3S)-3-(4-fluorophenyl)tetrahydrofuran-2-yl)-2-(methylthio)pyrimidine (**52**)

Following General Procedure **C1** on 0.1 mmol scale with **B12**, NiCl<sub>2</sub>•6H<sub>2</sub>O (40 mol%), BPhen (40 mol%), and boronic acid **SI-18** (3.0 equiv.). Purification by pTLC (silica, 6:1 Hexanes:EtOAc) afforded 19.3 mg (67%) of the title compound **52**.

**Physical State:** colorless oil.

**<sup>1</sup>H NMR (600 MHz, CDCl<sub>3</sub>):** δ 8.30 (s, 2H), 7.16 – 7.11 (m, 2H), 7.04 – 7.00 (m, 2H), 4.68 (d, *J* = 9.0 Hz, 1H), 4.28 – 4.21 (m, 2H), 3.11 (q, *J* = 9.1 Hz, 1H), 2.57 – 2.49 (m, 4H), 2.34 – 2.25 (m, 1H) ppm.

**<sup>19</sup>F NMR (376 MHz, CDCl<sub>3</sub>):** δ -115.60 ppm.

**<sup>13</sup>C NMR (151 MHz, CDCl<sub>3</sub>):** δ 172.2, 162.1 (d, *J*<sub>C-F</sub> = 245.9 Hz), 155.2, 134.7 (d, *J*<sub>C-F</sub> = 3.3 Hz), 129.3 (d, *J*<sub>C-F</sub> = 8.2 Hz), 129.1, 116.1 (d, *J*<sub>C-F</sub> = 21.5 Hz), 83.7 (d, *J*<sub>C-F</sub> = 0.8 Hz), 68.7, 53.8, 35.6, 14.2 ppm.

**HRMS (ESI-TOF):** calc'd for C<sub>15</sub>H<sub>16</sub>FN<sub>2</sub>OS [M+H]<sup>+</sup>: 291.0967, found: 291.0970

**TLC:** R<sub>f</sub> = 0.21 (6:1 Hexanes:EtOAc).

**[α]<sub>D</sub><sup>20</sup>** = -160.00 (*c* = 0.15, CHCl<sub>3</sub>).

**Chiral HPLC:** Chiralpak IC, 4.6 x 250 mm; 30/70 *i*PrOH/hexanes, 1 mL/min, 254 nm; *t*<sub>R</sub> (minor) = 11.74 min, *t*<sub>R</sub> (major) = 17.22 min, 93% *ee*.

Racemic:

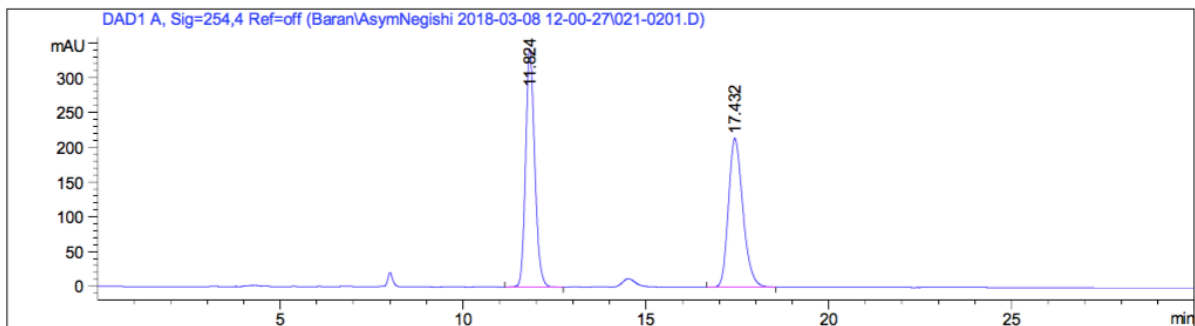

Enantioenriched **52**:

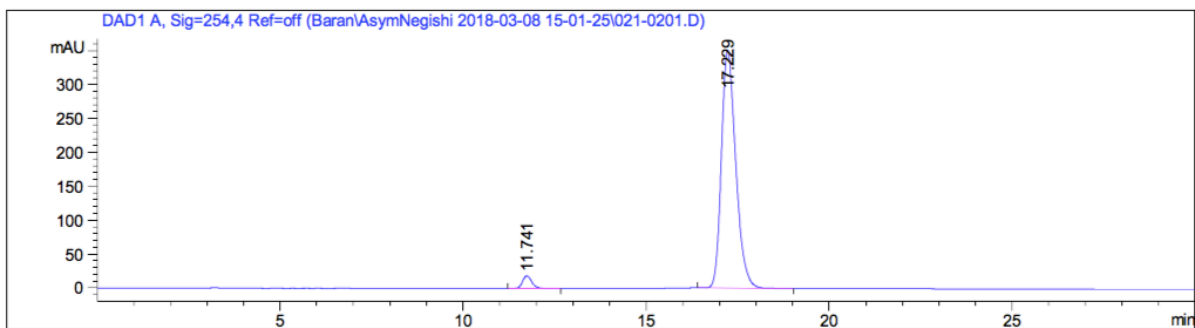

Signal 1: DAD1 A, Sig=254,4 Ref=off

| Peak # | RetTime [min] | Type | Width [min] | Area [mAU*s] | Height [mAU] | Area %  |
|--------|---------------|------|-------------|--------------|--------------|---------|
| 1      | 11.824        | BB   | 0.2665      | 5940.00928   | 342.21219    | 50.2913 |
| 2      | 17.432        | BB   | 0.4219      | 5871.19775   | 214.10947    | 49.7087 |

Signal 1: DAD1 A, Sig=254,4 Ref=off

| Peak # | RetTime [min] | Type | Width [min] | Area [mAU*s] | Height [mAU] | Area %  |
|--------|---------------|------|-------------|--------------|--------------|---------|
| 1      | 11.741        | BB   | 0.2712      | 335.06812    | 18.86878     | 3.3851  |
| 2      | 17.229        | BB   | 0.4183      | 9563.14258   | 350.47324    | 96.6149 |



## Experimental Procedures and Characterization Data for Piperidine (C-2)-Scaffolds (Figure 3–d)

### Compound B13

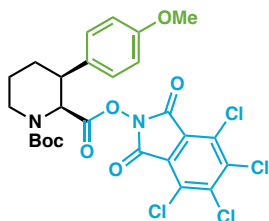

### 1-(*tert*-butyl) 2-(4,5,6,7-tetrachloro-1,3-dioxisoindolin-2-yl) (2*S*,3*S*)-3-(4-methoxyphenyl)piperidine-1,2-dicarboxylate (B13)

Following General Procedure **B** on 1.37 mmol scale with **A10**. Purification by flash column chromatography (silica, 6:1 Hexanes:EtOAc) afforded 696 mg (82%) of the title compound **B13**.

**Physical State:** yellow oil.

**<sup>1</sup>H NMR (600 MHz, CDCl<sub>3</sub>, both rotamers):** δ 7.27 (d, *J* = 8.5 Hz, 2H), 6.88 (t, *J* = 7.2 Hz, 2H), 5.54 – 5.23 (m, 1H), 4.21 – 4.08 (m, 1H), 3.79 (s, 3H), 3.25 – 3.15 (m, 2H), 2.21 – 2.11 (m, 1H), 1.99 – 1.91 (m, 2H), 1.69 – 1.63 (m, 1H), 1.53 (s, 9H) ppm.

**<sup>13</sup>C NMR (151 MHz, CDCl<sub>3</sub>, both rotamers):** δ 166.5, 166.3, 158.9, 158.8, 157.1, 155.3, 154.6, 141.0, 131.6, 130.4, 129.2, 129.1, 124.8, 114.1, 114.0, 81.7, 81.2, 59.3, 57.7, 55.3, 43.8, 43.1, 41.4, 40.4, 28.5, 28.3, 25.4, 25.0, 24.6, 24.4 ppm.

**HRMS (ESI-TOF):** calc'd for C<sub>26</sub>H<sub>24</sub>Cl<sub>4</sub>N<sub>2</sub>O<sub>7</sub>Na [M+H]<sup>+</sup>: 639.0235; found 639.0235.

**TLC:** R<sub>f</sub> = 0.2 (4:1 Hexanes:EtOAc).

**[α]<sub>D</sub><sup>20</sup>** = -55.8 (*c* = 1.0, CHCl<sub>3</sub>).

**Chiral HPLC:** Chiralpak IA, 4.6 x 250 mm; 45/55 *i*PrOH/hexanes, 1 mL/min, 254 nm; *t*<sub>R</sub> (minor) = 18.9 min, *t*<sub>R</sub> (major) = 8.5 min, >99% *ee*.

Racemic:

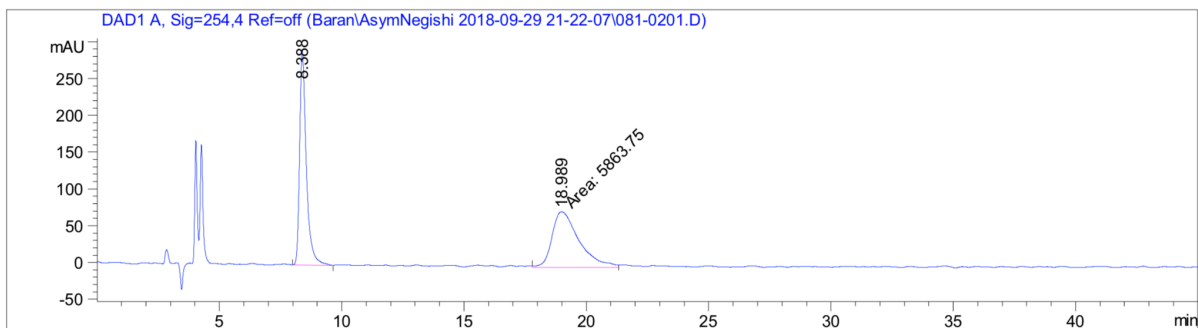

Enantioenriched B13:

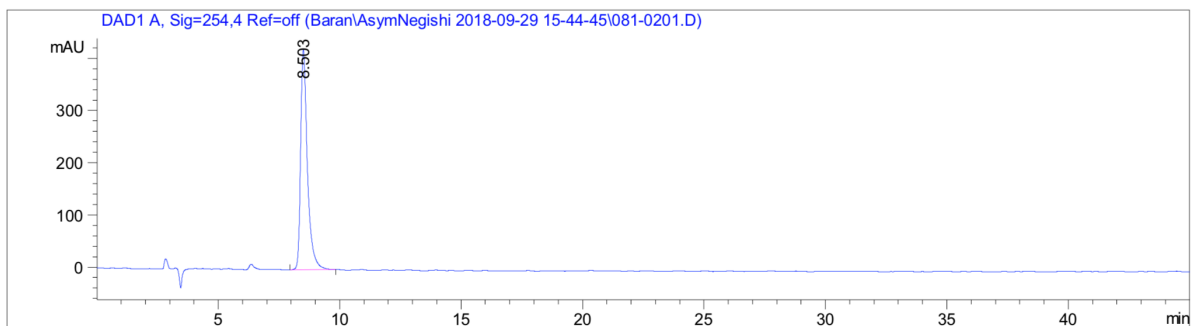

Signal 1: DAD1 A, Sig=254,4 Ref=off

| Peak # | RetTime [min] | Type | Width [min] | Area [mAU*s] | Height [mAU] | Area %  |
|--------|---------------|------|-------------|--------------|--------------|---------|
| 1      | 8.388         | BB   | 0.2817      | 5547.51758   | 291.98917    | 48.6144 |
| 2      | 18.989        | MM   | 1.2896      | 5863.75000   | 75.78203     | 51.3856 |

Signal 1: DAD1 A, Sig=254,4 Ref=off

| Peak # | RetTime [min] | Type | Width [min] | Area [mAU*s] | Height [mAU] | Area %   |
|--------|---------------|------|-------------|--------------|--------------|----------|
| 1      | 8.503         | BB   | 0.2911      | 8191.09229   | 420.75574    | 100.0000 |

## Compound 53

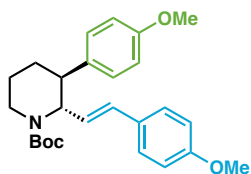

### *tert*-butyl (2*S*,3*S*)-3-(4-methoxyphenyl)-2-((*E*)-4-methoxystyryl)piperidine-1-carboxylate (53)

Following General Procedure C1 on 0.1 mmol scale with **B13**, NiCl<sub>2</sub>•6H<sub>2</sub>O (40 mol%), BPhen (45 mol%), and boronic acid **SI-21** (3.0 equiv.). Purification by pTLC (silica, 6:1 Hexanes:EtOAc) afforded 29.0 mg (69%) of the title compound **53**.

**Physical State:** colorless oil

**<sup>1</sup>H NMR (600 MHz, CDCl<sub>3</sub>, both rotamers)** δ 7.30 (d, *J* = 8.7 Hz, 2H), 7.28 – 7.26 (m, 2H), 6.86 (d, *J* = 8.7 Hz, 4H), 6.36 (dd, *J* = 15.9, 1.7 Hz, 1H), 6.14 (dd, *J* = 16.0, 5.4 Hz, 1H), 5.12 (s, 1H), 4.07 (dd, *J* = 14.0, 5.3 Hz, 1H), 3.81 (s, 3H), 3.80 (s, 3H), 3.08 – 2.98 (m, 2H), 2.02 – 1.97 (m, 1H), 1.80 – 1.76 (m, 1H), 1.62 – 1.58 (m, 1H), 1.49 (s, 9H), 1.48 – 1.41 (m, 1H), ppm.

**<sup>13</sup>C NMR (151 MHz, CDCl<sub>3</sub>, both rotamers)** δ 159.3, 158.0, 155.7, 136.4, 130.1, 129.9, 128.9, 127.6, 126.5, 114.1, 113.8, 79.8, 56.7, 55.5, 55.4, 42.1, 39.4, 28.7, 27.0, 20.2 ppm.

**TLC:** R<sub>f</sub> = 0.2 (8:1 Hexanes:EtOAc).

**HRMS (ESI-TOF):** calc'd for C<sub>26</sub>H<sub>34</sub>NO<sub>4</sub> [M+H]<sup>+</sup>: 424.2488; found 424.2480.

**[α]<sub>D</sub><sup>20</sup>** = 9.2 (*c* = 1.0, CHCl<sub>3</sub>).

**Chiral HPLC:** Chiralpak IA, 4.6 x 250 mm; 3/97 *i*PrOH/hexanes, 1 mL/min, 210 nm; *t*<sub>R</sub> (minor) = 21.1 min, *t*<sub>R</sub> (major) = 18.3min, >99% *ee*.

Racemic:

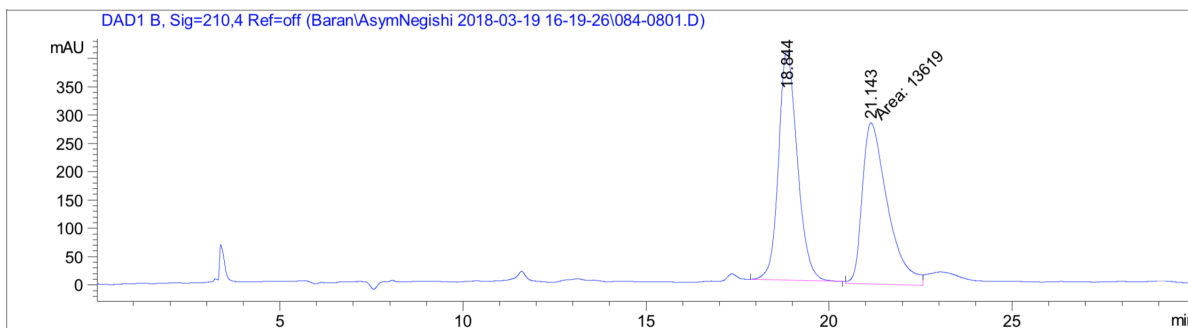

Enantioenriched 53:

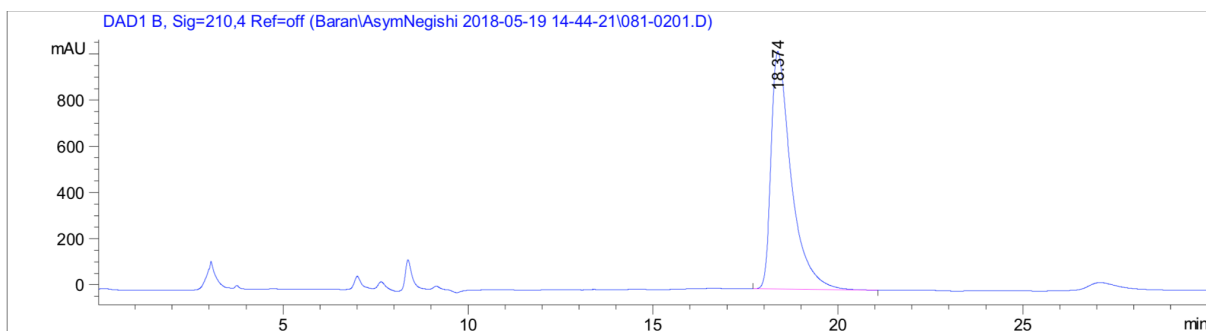

Signal 2: DAD1 B, Sig=210,4 Ref=off

| Peak # | RetTime [min] | Type | Width [min] | Area [mAU*s] | Height [mAU] | Area %  |
|--------|---------------|------|-------------|--------------|--------------|---------|
| 1      | 18.844        | BB   | 0.5411      | 1.44187e4    | 405.27939    | 51.4261 |
| 2      | 21.143        | MM   | 0.7986      | 1.36190e4    | 284.21771    | 48.5739 |

Signal 2: DAD1 B, Sig=210,4 Ref=off

| Peak # | RetTime [min] | Type | Width [min] | Area [mAU*s] | Height [mAU] | Area %   |
|--------|---------------|------|-------------|--------------|--------------|----------|
| 1      | 18.374        | BB   | 0.5578      | 3.91423e4    | 1029.05542   | 100.0000 |

## Compound 54

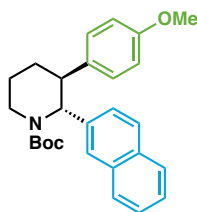

### *tert*-butyl (2*R*,3*S*)-3-(4-methoxyphenyl)-2-(naphthalen-2-yl)piperidine-1-carboxylate (**54**)

Following General Procedure C1 on 0.1 mmol scale with **B13**, NiCl<sub>2</sub>•6H<sub>2</sub>O (40 mol%), BPhen (45 mol%), and boronic acid **SI-11** (3.0 equiv.). Purification by pTLC (silica, 6:1 Hexanes:EtOAc) afforded 29.0 mg (70%) of the title compound **54**.

**Physical State:** colorless oil

**<sup>1</sup>H NMR (600 MHz, CDCl<sub>3</sub>, both rotamers)** δ 7.83 – 7.75 (m, 3H), 7.60 (s, 1H), 7.49 – 7.43 (m, 2H), 7.29 (dd, *J* = 8.5, 1.9 Hz, 1H), 7.26 – 7.23 (m, 2H), 6.85 (d, *J* = 8.7 Hz, 2H), 5.55 (d, *J* = 4.7 Hz, 1H), 4.27 (ddd, *J* = 13.8, 6.3, 2.2 Hz, 1H), 3.81 (s, 3H), 3.48 (t, *J* = 7.2 Hz, 1H), 3.31 – 3.22 (m, 1H), 1.94 – 1.78 (m, 3H), 1.55 (d, *J* = 11.1 Hz, 1H), 1.37 (s, 9H) ppm.

**<sup>13</sup>C NMR (151 MHz, CDCl<sub>3</sub>, both rotamers)** δ 158.1, 156.0, 139.8, 136.1, 133.4, 132.4, 129.0, 128.1, 128.0, 127.6, 126.1, 125.7, 125.1, 124.9, 113.8, 80.0, 59.8, 55.4, 42.8, 40.0, 28.5, 26.8, 20.5 ppm.

**HRMS (ESI-TOF):** calc'd for C<sub>27</sub>H<sub>31</sub>NO<sub>3</sub>Na [M+Na]<sup>+</sup>: 440.2202; found 440.2198.

**TLC:** R<sub>f</sub> = 0.3 (8:1 Hexanes:EtOAc).

**[α]<sub>D</sub><sup>20</sup>** = 14.1 (*c* = 1.0, CHCl<sub>3</sub>).

**Chiral HPLC:** Chiralpak ODH, 4.6 x 250 mm; 5/95 *i*PrOH/hexanes, 1 mL/min, 254 nm; *t*<sub>R</sub> (minor) = 6.7 min, *t*<sub>R</sub> (major) = 7.6 min, 98.5% *ee*.

Racemic:

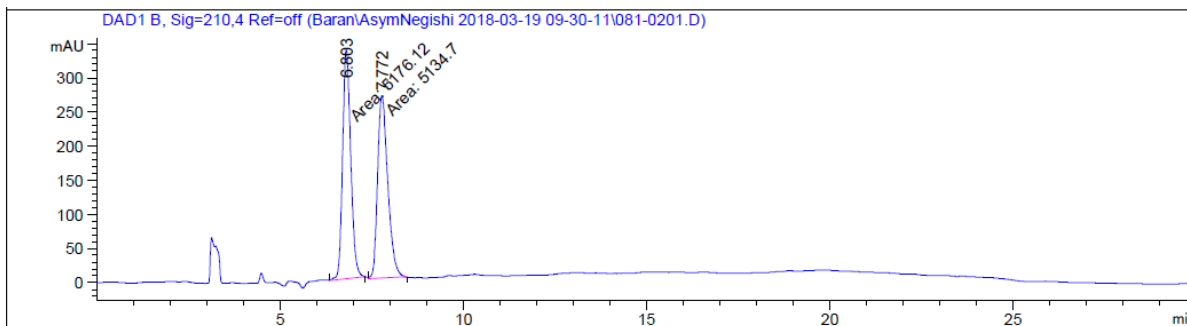

Enantioenriched **54**:

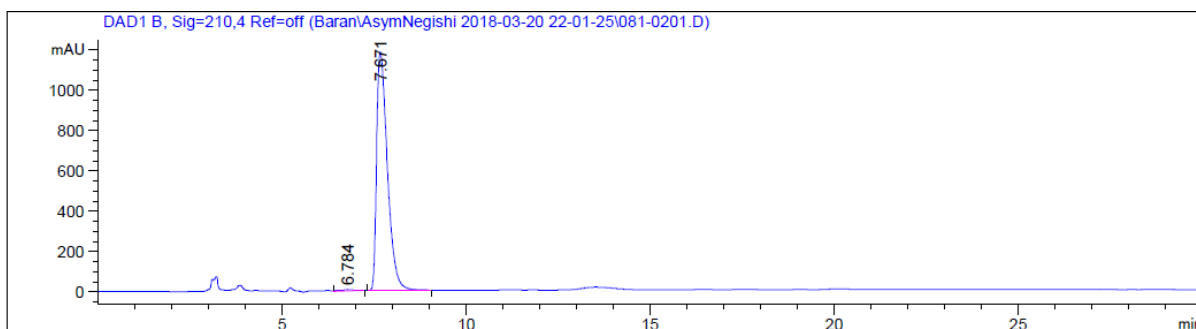

Signal 2: DAD1 B, Sig=210,4 Ref=off

| Peak # | RetTime [min] | Type | Width [min] | Area [mAU*s] | Height [mAU] | Area %  |
|--------|---------------|------|-------------|--------------|--------------|---------|
| 1      | 6.803         | MM   | 0.2570      | 5176.12061   | 335.64398    | 50.2009 |
| 2      | 7.772         | MM   | 0.3209      | 5134.69580   | 266.67416    | 49.7991 |

Signal 2: DAD1 B, Sig=210,4 Ref=off

| Peak # | RetTime [min] | Type | Width [min] | Area [mAU*s] | Height [mAU] | Area %  |
|--------|---------------|------|-------------|--------------|--------------|---------|
| 1      | 6.784         | VB   | 0.3640      | 187.79649    | 7.06824      | 0.7746  |
| 2      | 7.671         | BB   | 0.3114      | 2.40578e4    | 1182.08752   | 99.2254 |

## Compound 55

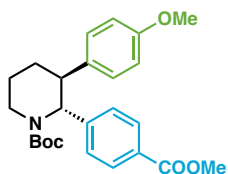

### ***tert*-butyl (2*R*,3*S*)-2-(4-(methoxycarbonyl)phenyl)-3-(4-methoxyphenyl)piperidine-1-carboxylate (55)**

Following General Procedure **C1** on 0.05 mmol scale with **B13**, NiCl<sub>2</sub>•6H<sub>2</sub>O (40 mol%), BPhen (45 mol%), and boronic acid **SI-7** (3.0 equiv.). Purification by pTLC (silica, 6:1 Hexanes:EtOAc) afforded 15.0 mg (71%) of the title compound **55**.

**Physical State:** colorless oil

**<sup>1</sup>H NMR (600 MHz, CDCl<sub>3</sub>, both rotamers)** δ 7.92 (d, *J* = 8.2 Hz, 2H), 7.15 (d, *J* = 8.1 Hz, 2H), 7.12 (d, *J* = 8.6 Hz, 2H), 6.82 (d, *J* = 8.7 Hz, 2H), 5.26 (d, *J* = 6.0 Hz, 1H), 4.21 (dd, *J* = 14.1, 4.3 Hz, 1H), 3.90 (s, 3H), 3.79 (s, 3H), 3.25 – 3.20 (m, 2H), 1.86 – 1.76 (m, 3H), 1.60 (s, 1H), 1.33 (s, 9H) ppm.

**<sup>13</sup>C NMR (151 MHz, CDCl<sub>3</sub>, both rotamers)** δ 167.1, 158.3, 155.8, 148.3, 135.4, 129.7, 129.0, 128.6, 126.4, 113.9, 80.2, 60.8, 55.4, 52.2, 43.7, 39.9, 28.5, 27.0, 20.7 ppm.

**HRMS (ESI-TOF):** calc'd for C<sub>25</sub>H<sub>32</sub>NO<sub>5</sub> [M+H]<sup>+</sup>: 426.2280; found 426.2279.

**TLC:** R<sub>f</sub> = 0.3 (4:1 Hexanes:EtOAc).

[α]<sub>D</sub><sup>20</sup> = 31.3 (*c* = 1.0, CHCl<sub>3</sub>).

**Chiral HPLC:** Chiralpak IC, 4.6 x 250 mm; 10/90 *i*PrOH/hexanes, 1 mL/min, 210 nm; *t*<sub>R</sub> (minor) = 15.3 min, *t*<sub>R</sub> (major) = 16.8 min, 98.5% *ee*.

Racemic:

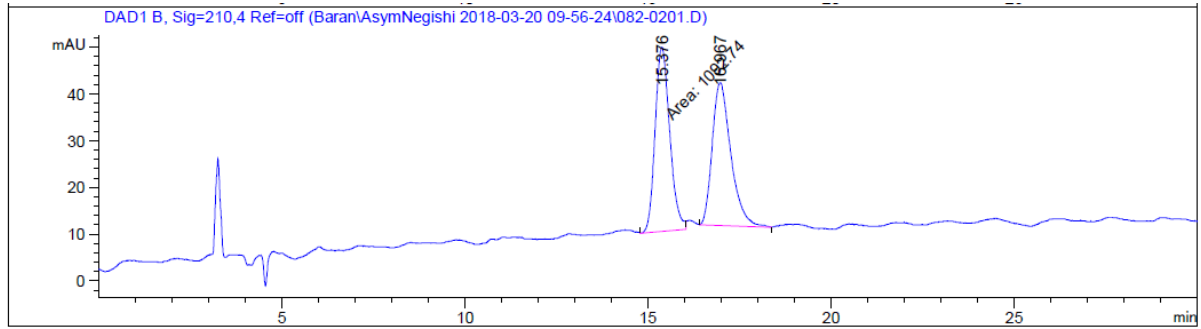

Enantioenriched 55:

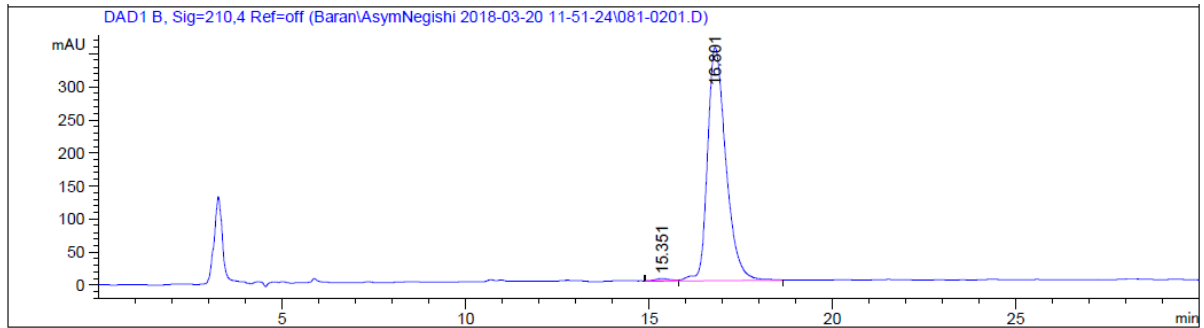

Signal 2: DAD1 B, Sig=210,4 Ref=off

| Peak # | RetTime [min] | Type | Width [min] | Area [mAU*s] | Height [mAU] | Area %  |
|--------|---------------|------|-------------|--------------|--------------|---------|
| 1      | 15.376        | MM   | 0.4625      | 1092.73706   | 39.37962     | 50.3752 |
| 2      | 16.967        | BB   | 0.5131      | 1076.45874   | 30.54625     | 49.6248 |

  

| Peak # | RetTime [min] | Type | Width [min] | Area [mAU*s] | Height [mAU] | Area %  |
|--------|---------------|------|-------------|--------------|--------------|---------|
| 1      | 15.351        | BV E | 0.3096      | 83.79869     | 3.30735      | 0.6788  |
| 2      | 16.801        | VB R | 0.5296      | 1.22609e4    | 352.69928    | 99.3212 |



## Compound 56

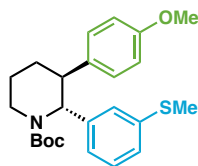

### *tert*-butyl (2*R*,3*S*)-3-(4-methoxyphenyl)-2-(3-(methylthio)phenyl)piperidine-1-carboxylate (56)

Following General Procedure C1 on 0.1 mmol scale with **B13**, NiCl<sub>2</sub>•6H<sub>2</sub>O (40 mol%), BPhen (45 mol%), and boronic acid **SI-8** (3.0 equiv.). Purification by pTLC (silica, 4:1 Hexanes:EtOAc) afforded 31.8 mg (77%) of the title compound **56**.

**Physical State:** colorless oil

**<sup>1</sup>H NMR (600 MHz, CDCl<sub>3</sub>, both rotamers)** δ 7.22 – 7.16 (m, 3H), 7.10 (dd, *J* = 8.3, 1.5 Hz, 1H), 7.00 (s, 1H), 6.92 (d, *J* = 7.7 Hz, 1H), 6.84 (d, *J* = 8.6 Hz, 2H), 5.31 (d, *J* = 5.0 Hz, 1H), 4.24 – 4.12 (m, 1H), 3.80 (s, 3H), 3.28 (dd, *J* = 7.8, 3.6 Hz, 1H), 3.15 (ddd, *J* = 13.3, 11.7, 4.7 Hz, 1H), 2.40 (s, 3H), 1.87 – 1.75 (m, 3H), 1.53 – 1.48 (m, 1H), 1.38 (s, 9H) ppm.

**<sup>13</sup>C NMR (151 MHz, CDCl<sub>3</sub>, both rotamers)** δ 158.1, 155.9, 143.2, 138.4, 135.9, 129.0, 128.8, 125.0, 124.7, 123.2, 113.8, 80.0, 59.8, 55.4, 43.0, 39.9, 28.5, 26.8, 20.5, 16.0 ppm.

**HRMS (ESI-TOF):** calc'd for C<sub>24</sub>H<sub>32</sub>NO<sub>3</sub>S [M+H]<sup>+</sup>: 414.2103; found 414.2096.

**TLC:** R<sub>f</sub> = 0.2 (8:1 Hexanes:EtOAc).

[α]<sub>D</sub><sup>20</sup> = 26.0 (*c* = 1.0, CHCl<sub>3</sub>).

**Chiral HPLC:** Chiralpak IA, 4.6 x 250 mm; 1/99 *i*PrOH/hexanes, 1 mL/min, 210 nm; *t*<sub>R</sub> (minor) = 24.7 min, *t*<sub>R</sub> (major) = 14.3 min, >99% *ee*.

Racemic:

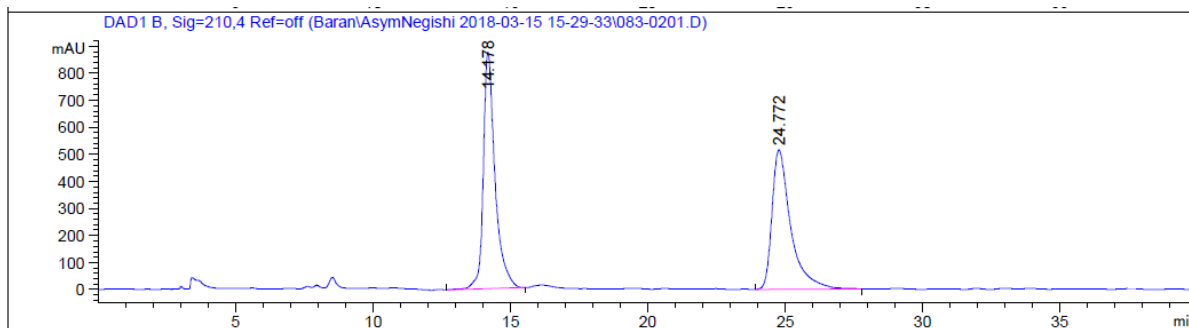

Enantioenriched 56:

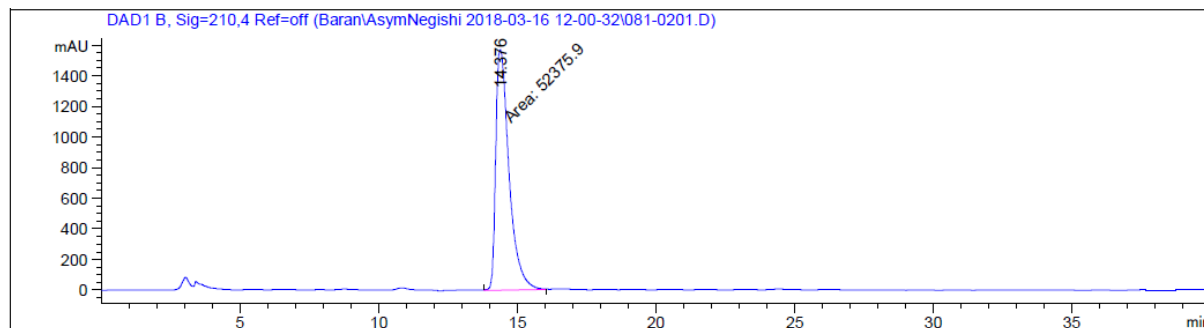

Signal 2: DAD1 B, Sig=210,4 Ref=off

| Peak # | RetTime [min] | Type | Width [min] | Area [mAU*s] | Height [mAU] | Area %  |
|--------|---------------|------|-------------|--------------|--------------|---------|
| 1      | 14.178        | BB   | 0.4387      | 2.58809e4    | 875.85364    | 51.5339 |
| 2      | 24.772        | BB   | 0.6995      | 2.43402e4    | 514.88135    | 48.4661 |

Signal 2: DAD1 B, Sig=210,4 Ref=off

| Peak # | RetTime [min] | Type | Width [min] | Area [mAU*s] | Height [mAU] | Area %   |
|--------|---------------|------|-------------|--------------|--------------|----------|
| 1      | 14.376        | MM   | 0.5555      | 5.23759e4    | 1571.38782   | 100.0000 |

## Compound 57

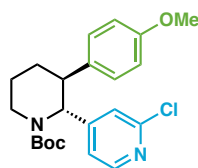

### ***Tert*-butyl (2*R*,3*S*)-2-(2-chloropyridin-4-yl)-3-(4-methoxyphenyl)piperidine-1-carboxylate (57)**

Following General Procedure **C1** on 0.05 mmol scale with **B13**, NiCl<sub>2</sub>•6H<sub>2</sub>O (40 mol%), BPhen (45 mol%), and boronic acid **SI-23** (3.0 equiv.). Purification by pTLC (silica, 5:1 Hexanes:EtOAc) afforded 19.1 mg (95%) of the title compound **57**.

**Physical State:** colorless oil

**<sup>1</sup>H NMR (600 MHz, CDCl<sub>3</sub>, both rotamers)** δ 8.24 (d, *J* = 5.2 Hz, 1H), 7.15 – 7.09 (m, 2H), 7.05 (s, 1H), 6.88 (dd, *J* = 5.2, 1.6 Hz, 1H), 6.87 – 6.82 (m, 2H), 5.19 (d, *J* = 6.1 Hz, 1H), 4.18 (d, *J* = 13.9 Hz, 1H), 3.80 (s, 3H), 3.19 – 3.14 (m, 2H), 1.89 – 1.77 (m, 3H), 1.61 – 1.55 (m, 1H), 1.38 (s, 9H) ppm.

**<sup>13</sup>C NMR (151 MHz, CDCl<sub>3</sub>, both rotamers)** δ 158.5, 155.5, 155.5, 152.0, 149.6, 134.46, 128.9, 122.0, 120.6, 114.1, 80.8, 59.9, 55.4, 43.4, 40.0, 28.4, 27.2, 20.6 ppm.

**HRMS (ESI-TOF):** calc'd for C<sub>22</sub>H<sub>28</sub>ClN<sub>2</sub>O<sub>3</sub> [M+H]<sup>+</sup>: 403.1788; found 403.1782.

**TLC:** R<sub>f</sub> = 0.3 (2:1 Hexanes:EtOAc).

[α]<sub>D</sub><sup>20</sup> = 34.9 (*c* = 1.0, CHCl<sub>3</sub>).

**Chiral HPLC:** Chiralpak IC, 4.6 x 250 mm; 20/80 *i*PrOH/hexanes, 1 mL/min, 210 nm; *t*<sub>R</sub> (minor) = 15.3 min, *t*<sub>R</sub> (major) = 10.8 min, 99% *ee*.

Racemic:

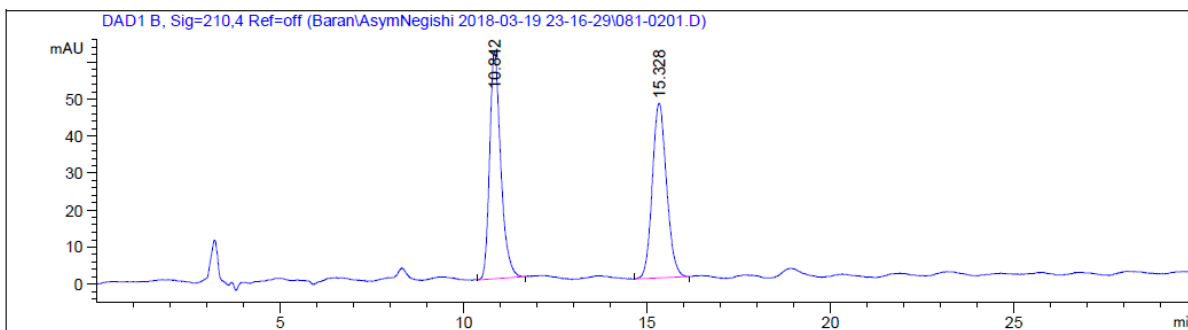

Enantioenriched 57:

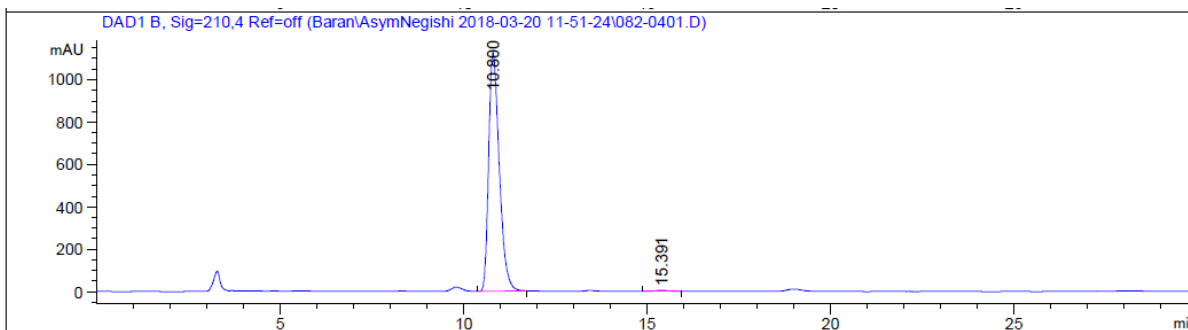

Signal 2: DAD1 B, Sig=210,4 Ref=off

| Peak # | RetTime [min] | Type | Width [min] | Area [mAU*s] | Height [mAU] | Area %  |
|--------|---------------|------|-------------|--------------|--------------|---------|
| 1      | 10.842        | BB   | 0.3175      | 1293.96545   | 61.50292     | 50.3203 |
| 2      | 15.328        | BB   | 0.4074      | 1277.49341   | 47.25077     | 49.6797 |

Signal 2: DAD1 B, Sig=210,4 Ref=off

| Peak # | RetTime [min] | Type | Width [min] | Area [mAU*s] | Height [mAU] | Area %  |
|--------|---------------|------|-------------|--------------|--------------|---------|
| 1      | 10.800        | BB   | 0.3082      | 2.26019e4    | 1126.11255   | 99.4221 |
| 2      | 15.391        | BB   | 0.3276      | 131.36803    | 5.21976      | 0.5779  |

## Compound 58

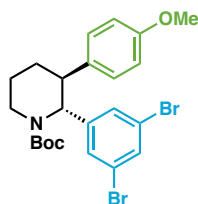

### *tert*-butyl (2*R*,3*S*)-2-(3,5-dibromophenyl)-3-(4-methoxyphenyl)piperidine-1-carboxylate (**58**)

Following General Procedure C1 on 0.1 mmol scale with **B13**, NiCl<sub>2</sub>•6H<sub>2</sub>O (40 mol%), BPhen (45 mol%), and boronic acid **SI-10** (3.0 equiv.). Purification by pTLC (silica, 5:1 Hexanes:EtOAc) afforded 25.9 mg (50%) of the title compound **58**.

**Physical State:** colorless oil

<sup>1</sup>H NMR (600 MHz, CDCl<sub>3</sub>, both rotamers) δ 7.50 (s, 1H), 7.15 (s, 2H), 7.12 (d, *J* = 8.6 Hz, 2H), 6.84 (d, *J* = 8.6 Hz, 2H), 5.17 (d, *J* = 5.8 Hz, 1H), 4.17 (dq, *J* = 13.9, 2.6 Hz, 1H), 3.80 (s, 3H), 3.21 – 3.11 (m, 2H), 1.82 (t, *J* = 4.2 Hz, 3H), 1.52 (d, *J* = 6.8 Hz, 1H), 1.39 (s, 9H) ppm.

<sup>13</sup>C NMR (151 MHz, CDCl<sub>3</sub>, both rotamers) δ 158.4, 155.6, 146.8, 135.0, 132.4, 128.9, 128.4, 123.0, 114.0, 80.5, 59.9, 55.4, 43.4, 39.9, 28.5, 26.9, 20.6 ppm.

**HRMS (ESI-TOF):** calc'd for C<sub>23</sub>H<sub>27</sub>Br<sub>2</sub>NO<sub>3</sub>Na [M+Na]<sup>+</sup>: 546.0255; found 546.0250.

**TLC:** R<sub>f</sub> = 0.3 (8:1 Hexanes:EtOAc).

[α]<sub>D</sub><sup>20</sup> = 21.1 (*c* = 1.0, CHCl<sub>3</sub>).

**Chiral SFC:** IG column (3 μm, 4.6x250 mm) under isocratic conditions [3% MeOH / CO<sub>2</sub> (4 mL/min), 1600 psi backpressure] at 30 °C. The enantiomers were detected by UV light (260 nm). *t*<sub>R</sub> (major) = 1.68 min, *t*<sub>R</sub> (minor) = 2.41 min, >99% *ee*.

Racemic:

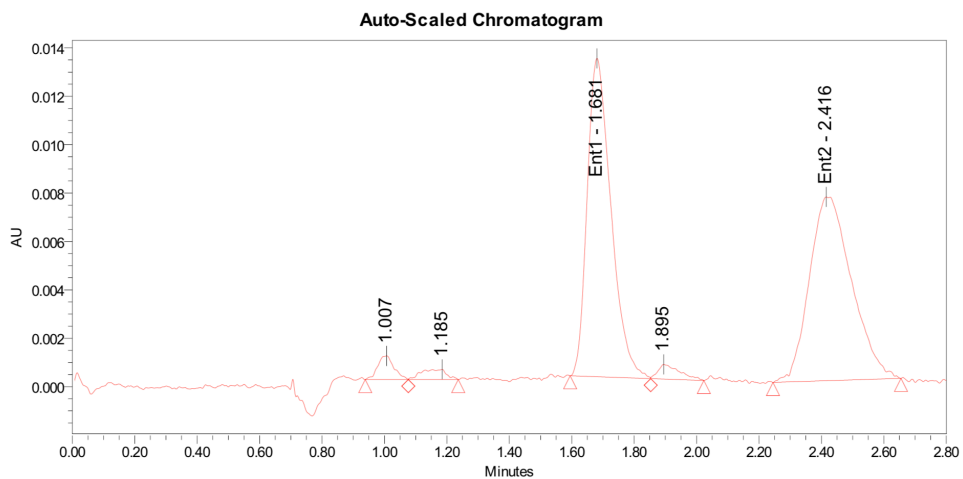

Enantioenriched **58**:

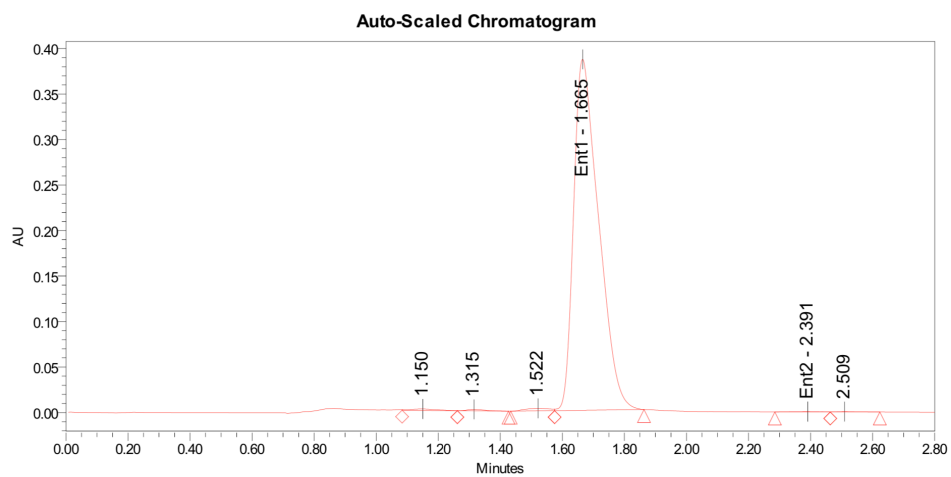

|         |       |       |       |       |       |
|---------|-------|-------|-------|-------|-------|
| KSF-142 | 49.42 | 50.58 | -1.16 | 69743 | 71385 |
|---------|-------|-------|-------|-------|-------|

|           |       |      |       |         |      |
|-----------|-------|------|-------|---------|------|
| MS-2-73-3 | 99.88 | 0.12 | 99.75 | 2156802 | 2690 |
|-----------|-------|------|-------|---------|------|

## Compound 59

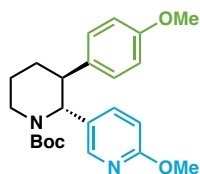

### *tert*-butyl (2*R*,3*S*)-3-(4-methoxyphenyl)-2-(6-methoxypyridin-3-yl)piperidine-1-carboxylate (59)

Following General Procedure C1 on 0.1 mmol scale with **B13**, NiCl<sub>2</sub>•6H<sub>2</sub>O (40 mol%), BPhen (45 mol%), and boronic acid **SI-15** (3.0 equiv.). Purification by pTLC (silica, 5:1 Hexanes:EtOAc) afforded 12.0 mg (30%) of the title compound **59**.

**Physical State:** colorless oil

**<sup>1</sup>H NMR (600 MHz, CDCl<sub>3</sub>, both rotamers)** δ 7.95 (d, *J* = 2.6 Hz, 1H), 7.36 (dd, *J* = 8.6, 2.6 Hz, 1H), 7.15 (d, *J* = 8.7 Hz, 2H), 6.83 (d, *J* = 8.7 Hz, 2H), 6.66 (d, *J* = 8.6 Hz, 1H), 5.25 (d, *J* = 5.7 Hz, 1H), 4.21 – 4.13 (m, 1H), 3.91 (s, 3H), 3.79 (s, 3H), 3.20 (td, *J* = 6.4, 3.8 Hz, 1H), 3.15 – 3.10 (m, 1H), 1.89 – 1.77 (m, 3H), 1.57 – 1.53 (m, 1H), 1.39 (s, 9H) ppm.

**<sup>13</sup>C NMR (151 MHz, CDCl<sub>3</sub>, both rotamers)** δ 163.1, 158.2, 155.6, 144.9, 137.4, 135.4, 130.5, 129.0, 113.9, 110.5, 80.1, 58.0, 55.4, 53.5, 43.1, 39.5, 28.5, 26.9, 20.8 ppm.

**HRMS (ESI-TOF):** calc'd for C<sub>23</sub>H<sub>31</sub>N<sub>2</sub>O<sub>4</sub> [M+H]<sup>+</sup>: 399.2284; found 399.2286.

**TLC:** R<sub>f</sub> = 0.3 (2:1 Hexanes:EtOAc).

[α]<sub>D</sub><sup>20</sup> = 20.4 (*c* = 1.0, CHCl<sub>3</sub>).

**Chiral HPLC:** Chiralpak IA, 4.6 x 250 mm; 20/80 *i*PrOH/hexanes, 1 mL/min, 254 nm; *t*<sub>R</sub> (minor) = 16.7 min, *t*<sub>R</sub> (major) = 14.8 min, >99% *ee*.

Racemic:

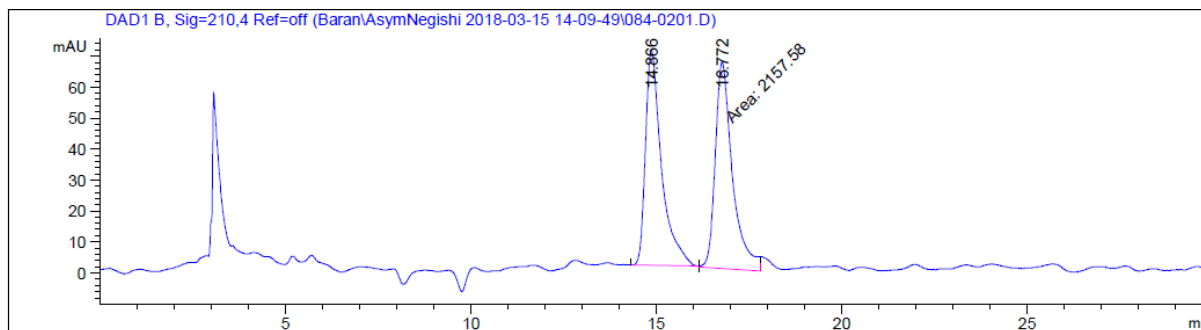

Enantioenriched 59:

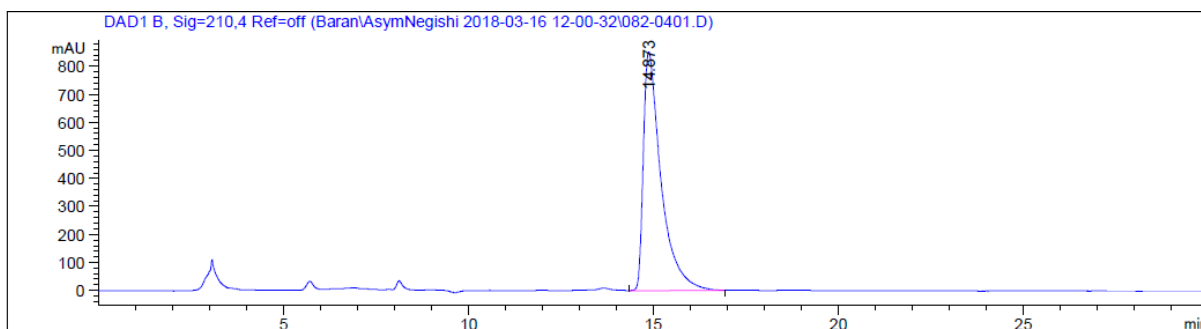

Signal 2: DAD1 B, Sig=210,4 Ref=off

| Peak # | RetTime [min] | Type | Width [min] | Area [mAU*s] | Height [mAU] | Area %  |
|--------|---------------|------|-------------|--------------|--------------|---------|
| 1      | 14.866        | BB   | 0.4433      | 2096.68799   | 69.64073     | 49.2844 |
| 2      | 16.772        | MM   | 0.5391      | 2157.57544   | 66.70678     | 50.7156 |

Signal 2: DAD1 B, Sig=210,4 Ref=off

| Peak # | RetTime [min] | Type | Width [min] | Area [mAU*s] | Height [mAU] | Area %   |
|--------|---------------|------|-------------|--------------|--------------|----------|
| 1      | 14.873        | BB   | 0.4852      | 2.82749e4    | 852.05243    | 100.0000 |



## Experimental Procedures and Characterization Data for Piperidine (C-3)-Scaffolds (Figure 3–e)

### Compound B14

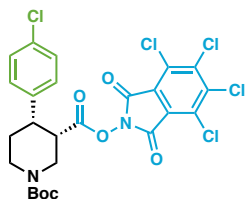

### 1-(*tert*-butyl) 3-(4,5,6,7-tetrachloro-1,3-dioxisoindolin-2-yl) (3*R*,4*R*)-4-(4-chlorophenyl)piperidine-1,3-dicarboxylate (B14)

Following General Procedure **B** on 1.5 mmol scale with **A11**. Purification by flash column chromatography (silica, 4:1 Hexanes:EtOAc) afforded 772 mg (83%) of the title compound **B14**.

**Physical State:** yellow oil.

**<sup>1</sup>H NMR (600 MHz, CDCl<sub>3</sub>, both rotamers):** δ 7.34 (d, *J* = 7.5 Hz, 2H), 7.21 (s, 2H), 4.78 – 4.30 (m, 2H), 3.44 – 3.06 (m, 3H), 2.88 (d, *J* = 73.9 Hz, 1H), 2.56 – 2.39 (m, 1H), 1.78 (d, *J* = 13.5 Hz, 1H), 1.46 (s, 9H) ppm.

**<sup>13</sup>C NMR (151 MHz, CDCl<sub>3</sub>, both rotamers):** δ 167.4, 157.1, 154.4, 141.0, 139.4, 133.2, 130.5, 129.1, 128.9, 124.8, 80.5, 46.1, 45.3, 44.3, 43.6, 43.3, 43.1, 28.2, 25.7 ppm.

**HRMS (ESI-TOF):** calc'd for C<sub>25</sub>H<sub>22</sub>Cl<sub>5</sub>N<sub>2</sub>O<sub>6</sub> [M+H]<sup>+</sup>: 620.9921; found 620.9901.

**TLC:** R<sub>f</sub> = 0.3 (2:1 Hexanes:EtOAc).

**[α]<sub>D</sub><sup>20</sup>** = -56.5 (*c* = 1.0, CHCl<sub>3</sub>).

**Chiral HPLC:** Chiralpak IA, 4.6 x 250 mm; 45/55 *i*PrOH/hexanes, 1 mL/min, 254 nm; *t*<sub>R</sub> (minor) = 18.2 min, *t*<sub>R</sub> (major) = 9.8 min, >99% *ee*.

Racemic:

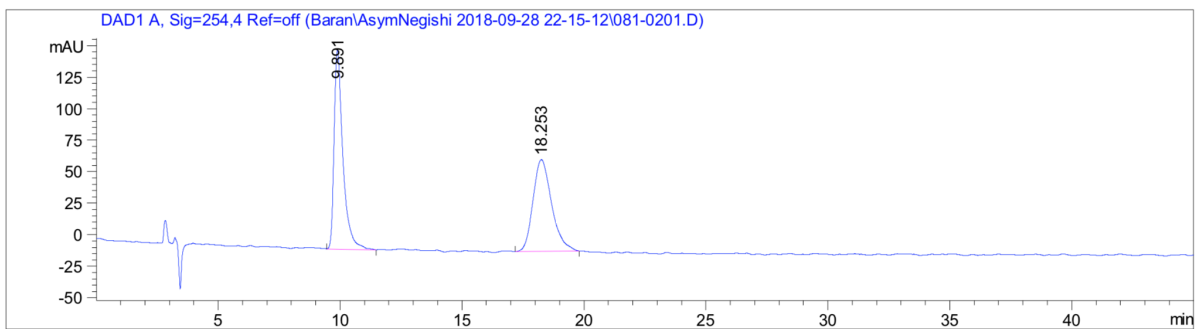

Enantioenriched B14:

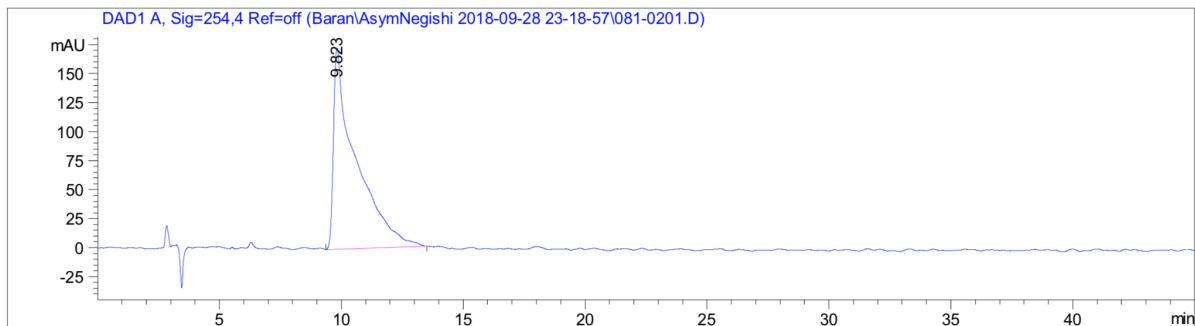

Signal 1: DAD1 A, Sig=254,4 Ref=off

| Peak # | RetTime [min] | Type | Width [min] | Area [mAU*s] | Height [mAU] | Area %  |
|--------|---------------|------|-------------|--------------|--------------|---------|
| 1      | 9.891         | BB   | 0.3728      | 3963.37134   | 157.90796    | 50.5948 |
| 2      | 18.253        | BB   | 0.8085      | 3870.19067   | 72.76498     | 49.4052 |

Signal 1: DAD1 A, Sig=254,4 Ref=off

| Peak # | RetTime [min] | Type | Width [min] | Area [mAU*s] | Height [mAU] | Area %   |
|--------|---------------|------|-------------|--------------|--------------|----------|
| 1      | 9.823         | BB   | 0.8237      | 1.10843e4    | 172.96115    | 100.0000 |

## Compound 60

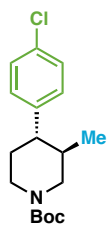

### *tert*-butyl (3*R*,4*S*)-4-(4-chlorophenyl)-3-methylpiperidine-1-carboxylate (**60**)

Following General Procedure C2 on 0.1 mmol scale with **B14**, NiCl<sub>2</sub>•glyme (30 mol%), di*t*BuBipy (40 mol%), and Zinc reagent **SI-26** (2.0 equiv.). Purification by pTLC (silica, 7:1 Hexanes: EtOAc) afforded 26.3 mg (85%) of the title compound **60**.

**Physical State:** colorless oil

**<sup>1</sup>H NMR (600 MHz, CDCl<sub>3</sub>, both rotamers):** δ 7.26 (d, *J* = 8.4 Hz, 2H), 7.08 (d, *J* = 8.3 Hz, 2H), 4.19 (s, 2H), 2.75 (s, 1H), 2.40 (s, 1H), 2.16 (td, *J* = 11.6, 3.8 Hz, 1H), 1.71 (d, *J* = 11.4 Hz, 2H), 1.60 (d, *J* = 3.8 Hz, 1H), 1.48 (s, 9H), 0.66 (d, *J* = 6.6 Hz, 3H) ppm.

**<sup>13</sup>C NMR (151 MHz, CDCl<sub>3</sub>, both rotamers):** δ 154.8, 143.2, 132.1, 129.0, 128.7, 79.7, 51.0, 50.3, 44.8, 36.5, 34.3, 28.6, 16.9 ppm.

**HRMS (ESI-TOF):** calc'd for C<sub>17</sub>H<sub>25</sub>ClNO<sub>2</sub> [M+H]<sup>+</sup>: 310.1574; found 310.1578.

**TLC:** R<sub>f</sub> = 0.3 (8:1 Hexanes:EtOAc).

**[α]<sub>D</sub><sup>20</sup>** = 2.9 (*c* = 1.0, CHCl<sub>3</sub>).

**Chiral HPLC:** Chiralpak IC, 4.6 x 250 mm; 5/95 *i*PrOH/hexanes, 0.5 mL/min, 210 nm; *t*<sub>R</sub> (minor) = 12.3 min, *t*<sub>R</sub> (major) = 14.1 min, 98% *ee*.

Racemic:

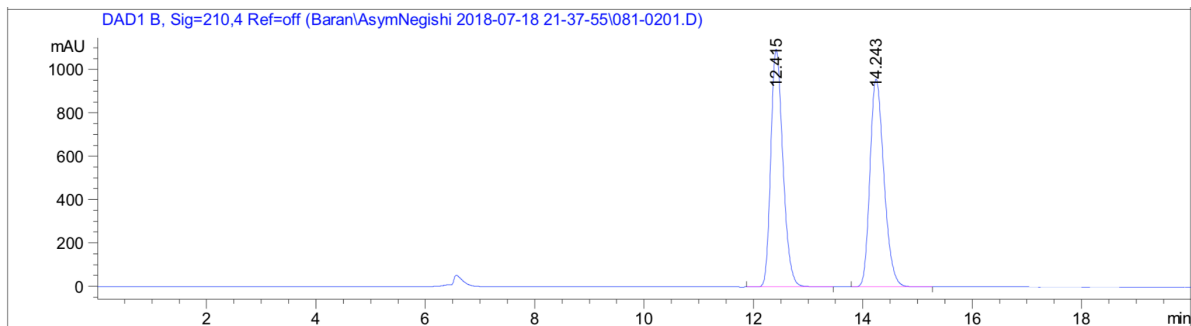

Enantioenriched **60**:

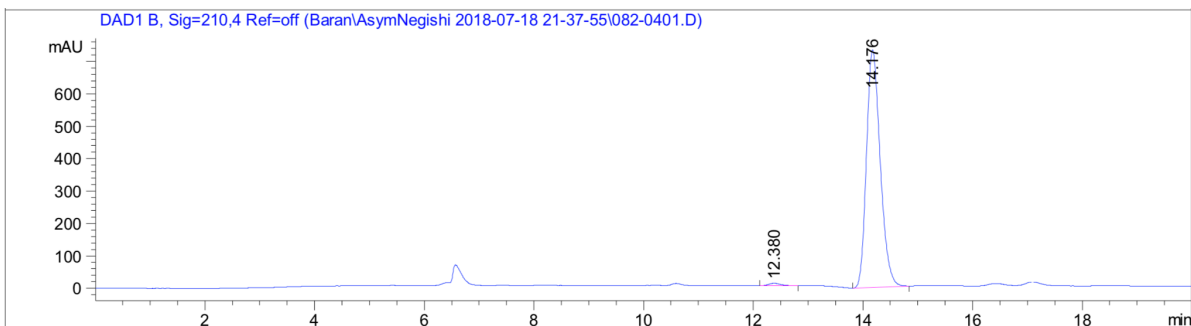

Signal 2: DAD1 B, Sig=210,4 Ref=off

| Peak # | RetTime [min] | Type | Width [min] | Area [mAU*s] | Height [mAU] | Area %  |
|--------|---------------|------|-------------|--------------|--------------|---------|
| 1      | 12.415        | BB   | 0.2379      | 1.68894e4    | 1095.56909   | 49.7838 |
| 2      | 14.243        | BB   | 0.2755      | 1.70361e4    | 957.74109    | 50.2162 |

Signal 2: DAD1 B, Sig=210,4 Ref=off

| Peak # | RetTime [min] | Type | Width [min] | Area [mAU*s] | Height [mAU] | Area %  |
|--------|---------------|------|-------------|--------------|--------------|---------|
| 1      | 12.380        | BB   | 0.2236      | 108.97846    | 7.41083      | 0.8465  |
| 2      | 14.176        | BB   | 0.2693      | 1.27643e4    | 732.58002    | 99.1535 |

## Compound 61

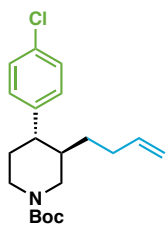

### *tert*-butyl (3*R*,4*S*)-3-(but-3-en-1-yl)-4-(4-chlorophenyl)piperidine-1-carboxylate (**61**)

Following General Procedure **C2** on 0.1 mmol scale with **B14**, NiCl<sub>2</sub>•glyme (30 mol%), di*t*BuBipy (40 mol%), and Zinc reagent **SI-25** (2.0 equiv.). Purification by pTLC (silica, 10:1 Hexanes:EtOAc) afforded 26.8 mg (77%) of the title compound **61**.

**Physical State:** colorless oil

**<sup>1</sup>H NMR (600 MHz, CDCl<sub>3</sub>, both rotamers):** δ 7.29 – 7.24 (m, 2H), 7.07 (d, *J* = 8.5 Hz, 2H), 5.66 – 5.55 (m, 1H), 4.93 – 4.88 (m, 2H), 4.33 – 4.20 (m, 2H), 2.74 (s, 1H), 2.39 (s, 1H), 2.27 (td, *J* = 11.6, 3.8 Hz, 1H), 2.06 – 2.00 (m, 1H), 1.91 – 1.82 (m, 1H), 1.72 (d, *J* = 11.7 Hz, 1H), 1.63 (s, 1H), 1.49 (s, 9H), 1.26 – 1.21 (m, 2H), 0.98 (ddt, *J* = 13.8, 9.2, 4.6 Hz, 1H) ppm.

**<sup>13</sup>C NMR (151 MHz, CDCl<sub>3</sub>, both rotamers):** δ 154.8, 143.1, 138.3, 132.1, 129.0, 128.8, 115.0, 79.7, 49.0, 48.5, 44.5, 40.5, 34.7, 30.8, 30.5, 28.6 ppm.

**HRMS (ESI-TOF):** calc'd for C<sub>20</sub>H<sub>29</sub>ClNO<sub>2</sub> [M+H]<sup>+</sup>: 350.1887; found 350.1883.

**TLC:** R<sub>f</sub> = 0.4 (8:1 Hexanes:EtOAc).

[α]<sub>D</sub><sup>20</sup> = 8.9 (*c* = 0.5, CHCl<sub>3</sub>).

**Chiral HPLC:** Chiralpak IC, 4.6 x 250 mm; 10/90 *i*PrOH/hexanes, 0.5 mL/min, 210 nm; *t*<sub>R</sub> (minor) = 9.8 min, *t*<sub>R</sub> (major) = 11.2 min, 98% *ee*.

Racemic:

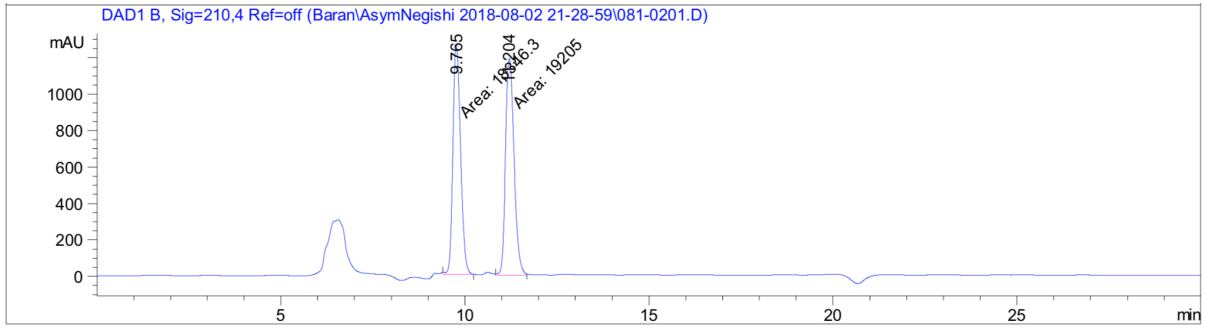

Enantioenriched **61**:

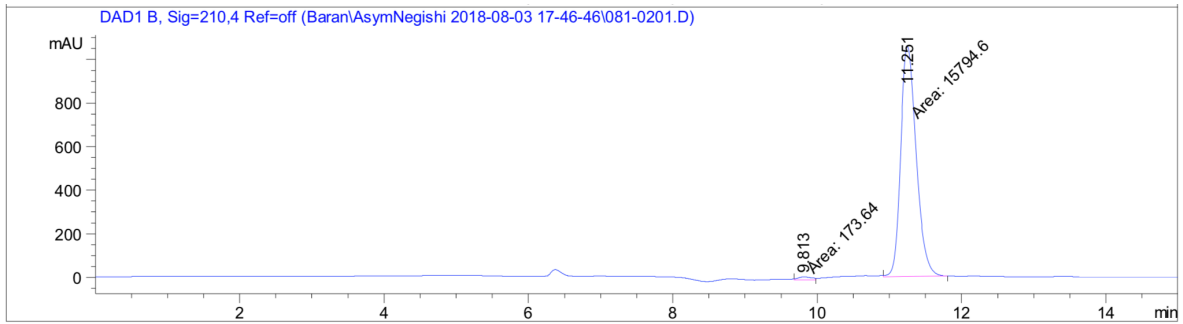

Signal 2: DAD1 B, Sig=210,4 Ref=off

| Peak # | RetTime [min] | Type | Width [min] | Area [mAU*s] | Height [mAU] | Area %  |
|--------|---------------|------|-------------|--------------|--------------|---------|
| 1      | 9.765         | MM   | 0.2432      | 1.83463e4    | 1257.40454   | 48.8567 |
| 2      | 11.204        | MM   | 0.2688      | 1.92050e4    | 1190.69885   | 51.1433 |

Signal 2: DAD1 B, Sig=210,4 Ref=off

| Peak # | RetTime [min] | Type | Width [min] | Area [mAU*s] | Height [mAU] | Area %  |
|--------|---------------|------|-------------|--------------|--------------|---------|
| 1      | 9.813         | MM   | 0.2122      | 173.64006    | 13.63709     | 1.0874  |
| 2      | 11.251        | MM   | 0.2491      | 1.57946e4    | 1056.90015   | 98.9126 |

## Compound 62

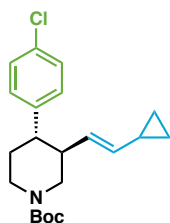

### *tert*-butyl (3*R*,4*S*)-4-(4-chlorophenyl)-3-((*E*)-2-cyclopropylvinyl)piperidine-1-carboxylate (62)

Following General Procedure C1 on 0.1 mmol scale with **B14**, NiCl<sub>2</sub>•glyme (40 mol%), diOMeBipy (40 mol%), **SI-22** (2.0 equiv.). Purification by pTLC (silica, 10:1 Hexanes:EtOAc) afforded 32.8 mg (91%) of the title compound **62**.

**Physical State:** colorless oil

**<sup>1</sup>H NMR (600 MHz, CDCl<sub>3</sub>, both rotamers):** δ 7.23 (d, *J* = 8.4 Hz, 2H), 7.04 (d, *J* = 8.4 Hz, 2H), 5.06 (dd, *J* = 15.5, 7.6 Hz, 1H), 4.78 (dd, *J* = 15.5, 8.4 Hz, 1H), 4.19 (s, 2H), 2.75 (s, 1H), 2.54 (s, 1H), 2.37 (td, *J* = 11.6, 3.8 Hz, 1H), 2.24 (s, 1H), 1.80 – 1.71 (m, 1H), 1.63 – 1.57 (m, 1H), 1.48 (s, 9H), 1.16 – 1.11 (m, 1H), 0.55 – 0.50 (m, 2H), 0.14– 0.08 (m, 2H) ppm.

**<sup>13</sup>C NMR (151 MHz, CDCl<sub>3</sub>, both rotamers):** δ 154.3, 142.3, 135.9, 131.3, 128.6, 127.9, 126.2, 79.1, 48.8, 47.9, 43.9, 33.4, 28.0, 13.0, 6.1, 5.9 ppm.

**HRMS (ESI-TOF):** calc'd for C<sub>16</sub>H<sub>20</sub>ClN [M-Boc+H]<sup>+</sup>: 262.1363; found 262.1357.

**TLC:** R<sub>f</sub> = 0.4 (8:1 Hexanes:EtOAc).

**[α]<sub>D</sub><sup>20</sup>** = 9.2 (*c* = 0.5, CHCl<sub>3</sub>).

**Chiral HPLC:** Chiralpak IC, 4.6 x 250 mm; 5/95 *i*PrOH/hexanes, 0.5 mL/min, 210 nm; *t*<sub>R</sub> (minor) = 14.5 min, *t*<sub>R</sub> (major) = 15.8 min, 94% *ee*.

Racemic:

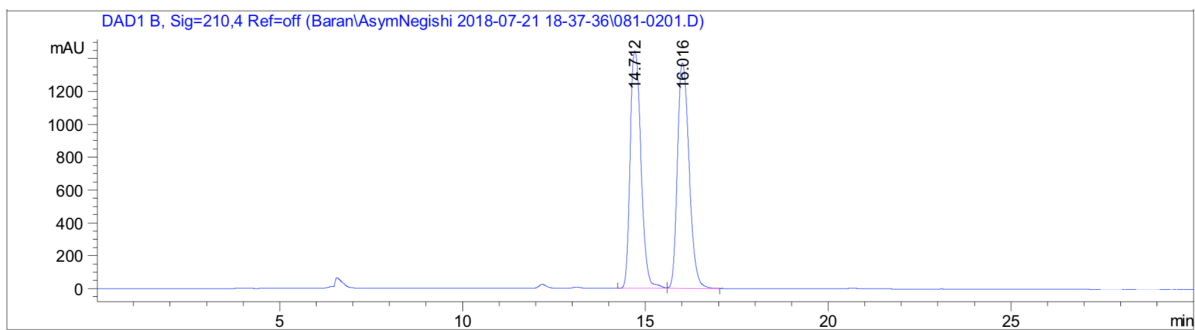

Enantioenriched **62**:

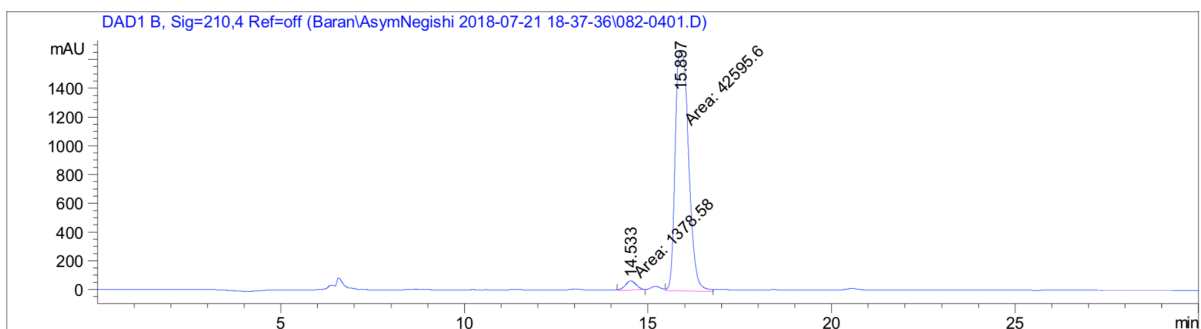

Signal 2: DAD1 B, Sig=210,4 Ref=off

| Peak # | RetTime [min] | Type | Width [min] | Area [mAU*s] | Height [mAU] | Area %  |
|--------|---------------|------|-------------|--------------|--------------|---------|
| 1      | 14.712        | BV   | 0.3251      | 2.98487e4    | 1444.40845   | 49.5122 |
| 2      | 16.016        | VB   | 0.3488      | 3.04369e4    | 1371.92883   | 50.4878 |

Signal 2: DAD1 B, Sig=210,4 Ref=off

| Peak # | RetTime [min] | Type | Width [min] | Area [mAU*s] | Height [mAU] | Area %  |
|--------|---------------|------|-------------|--------------|--------------|---------|
| 1      | 14.533        | MM   | 0.3551      | 1378.57922   | 64.69947     | 3.1350  |
| 2      | 15.897        | MM   | 0.4274      | 4.25956e4    | 1661.17053   | 96.8650 |



## Compound 63

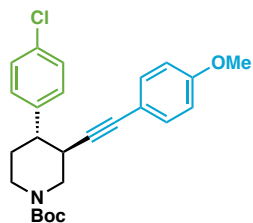

### *tert*-butyl (3*S*,4*S*)-4-(4-chlorophenyl)-3-((4-methoxyphenyl)ethynyl)piperidine-1-carboxylate (**63**)

Following General Procedure C6 on 0.1 mmol scale with **B14**. Purification by pTLC (silica, 10:1 Hexanes:EtOAc) afforded 19.5 mg (46%) of the title compound **63**.

**Physical State:** colorless oil

**<sup>1</sup>H NMR (600 MHz, CDCl<sub>3</sub>, both rotamers):** δ 7.29 (d, *J* = 8.5 Hz, 2H), 7.20 (d, *J* = 8.5 Hz, 2H), 7.13 (d, *J* = 8.3 Hz, 2H), 6.75 (d, *J* = 8.9 Hz, 2H), 4.46 – 4.27 (m, 2H), 3.77 (s, 3H), 2.82 (s, 2H), 2.67 (d, *J* = 10.1 Hz, 2H), 1.86 – 1.78 (m, 1H), 1.69 (s, 1H), 1.50 (s, 9H) ppm.

**<sup>13</sup>C NMR (151 MHz, CDCl<sub>3</sub>, both rotamers):** δ 159.4, 154.5, 142.1, 133.0, 132.5, 129.1, 128.6, 115.3, 113.9, 87.3, 83.5, 80.1, 55.4, 49.3, 48.5, 43.9, 36.3, 32.7, 28.6 ppm.

**HRMS (ESI-TOF):** calc'd for C<sub>25</sub>H<sub>29</sub>ClNO<sub>3</sub> [M+H]<sup>+</sup>: 426.1836; found 426.1837.

**TLC:** R<sub>f</sub> = 0.3 (6:1 Hexanes:EtOAc).

**[α]<sub>D</sub><sup>20</sup>** = 34.1 (*c* = 0.25, CHCl<sub>3</sub>).

**Chiral HPLC:** Chiralpak IC, 4.6 x 250 mm; 10/90 *i*PrOH/hexanes, 0.5 mL/min, 254 nm; *t*<sub>R</sub> (minor) = 13.8 min, *t*<sub>R</sub> (major) = 15.9 min, 96% *ee*.

Racemic:

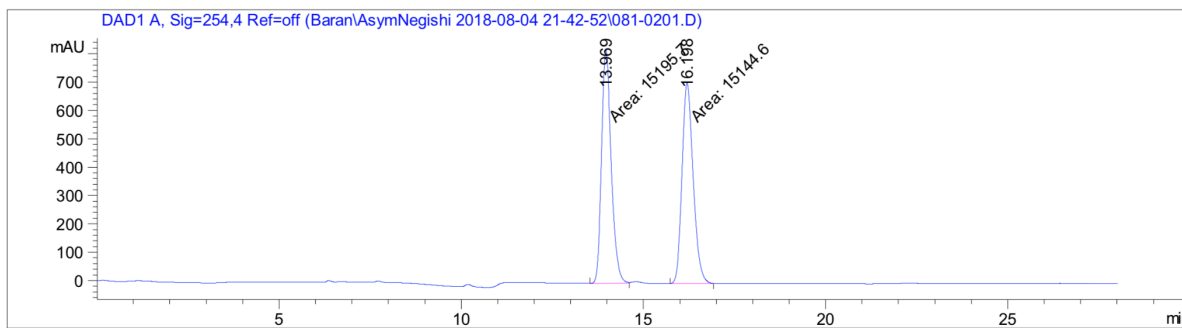

Enantioenriched **63**:

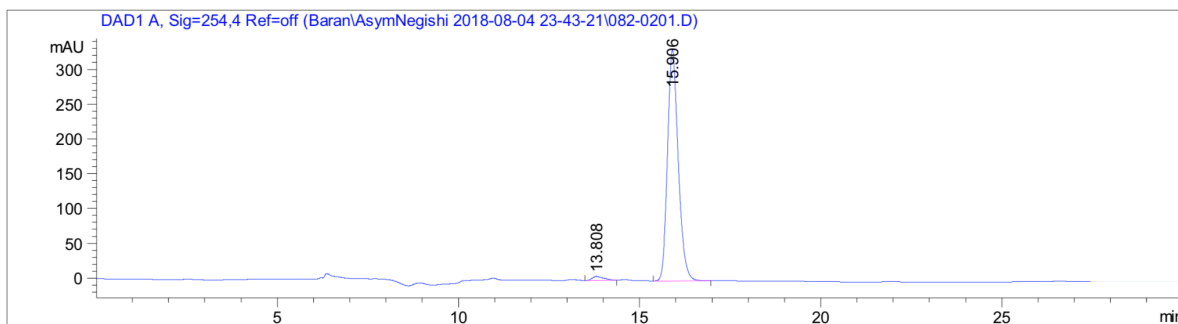

Signal 1: DAD1 A, Sig=254,4 Ref=off

| Peak # | RetTime [min] | Type | Width [min] | Area [mAU*s] | Height [mAU] | Area %  |
|--------|---------------|------|-------------|--------------|--------------|---------|
| 1      | 13.969        | MM   | 0.3073      | 1.51957e4    | 824.02411    | 50.0843 |
| 2      | 16.198        | MM   | 0.3557      | 1.51446e4    | 709.60089    | 49.9157 |

Signal 1: DAD1 A, Sig=254,4 Ref=off

| Peak # | RetTime [min] | Type | Width [min] | Area [mAU*s] | Height [mAU] | Area %  |
|--------|---------------|------|-------------|--------------|--------------|---------|
| 1      | 13.808        | BB   | 0.3157      | 129.20750    | 5.84851      | 1.8520  |
| 2      | 15.906        | BB   | 0.3166      | 6847.51367   | 332.00601    | 98.1480 |

## Compound 64

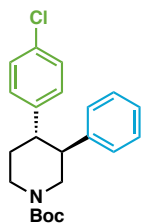

### *tert*-butyl (3*S*,4*S*)-4-(4-chlorophenyl)-3-phenylpiperidine-1-carboxylate (**64**)

Following General Procedure C4 on 0.1 mmol scale with **B14**, NiCl<sub>2</sub>•glyme (30 mol%), di*t*BuBipy (40 mol%), and Zinc reagent **SI-35** (2.0 equiv.). Purification by pTLC (silica, 4:1 Hexanes:EtOAc) afforded 32.8 mg (88%) of the title compound **64**.

**Physical State:** colorless oil

**<sup>1</sup>H NMR (600 MHz, CDCl<sub>3</sub>, both rotamers)** δ 7.16 (t, *J* = 7.5 Hz, 2H), 7.11 – 7.07 (m, 3H), 7.04 (d, *J* = 7.0 Hz, 2H), 6.95 (d, *J* = 8.3 Hz, 2H), 4.31 (s, 2H), 2.95 – 2.82 (m, 4H), 1.88 (d, *J* = 12.3 Hz, 1H), 1.79 – 1.72 (m, 1H), 1.49 (s, 9H) ppm.

**<sup>13</sup>C NMR (151 MHz, CDCl<sub>3</sub>, both rotamers)** δ 154.8, 142.3, 141.0, 131.8, 128.9, 128.5, 127.9, 126.7, 79.9, 51.0, 48.9, 48.2, 44.3, 34.2, 28.6 ppm.

**HRMS (ESI-TOF):** calc'd for C<sub>22</sub>H<sub>27</sub>ClNO<sub>2</sub> [M+H]<sup>+</sup>: 372.1730; found 372.1734.

**TLC:** R<sub>f</sub> = 0.4 (8:1 Hexanes:EtOAc).

**[α]<sub>D</sub><sup>20</sup>** = 41.4 (*c* = 1.0, CHCl<sub>3</sub>).

**Chiral HPLC:** Chiralpak IC, 4.6 x 250 mm; 10/90 *i*PrOH/hexanes, 1 mL/min, 210 nm; *t*<sub>R</sub> (minor) = 9.6 min, *t*<sub>R</sub> (major) = 10.4 min, 96% *ee*.

Racemic:

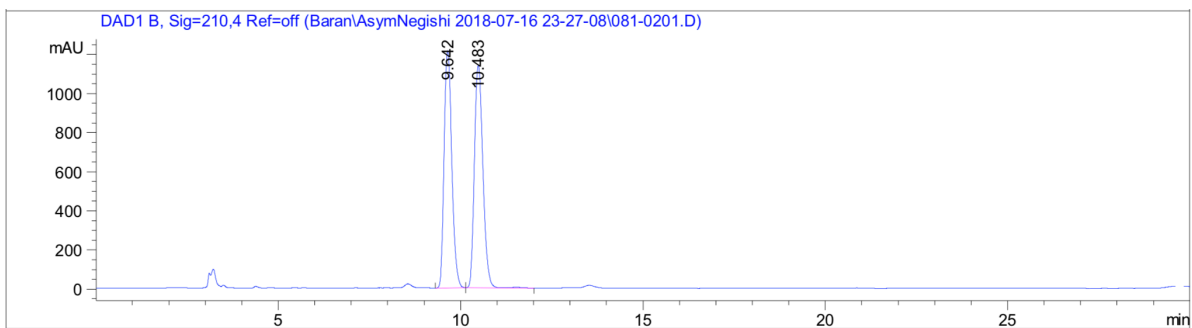

Enantioenriched **64**:

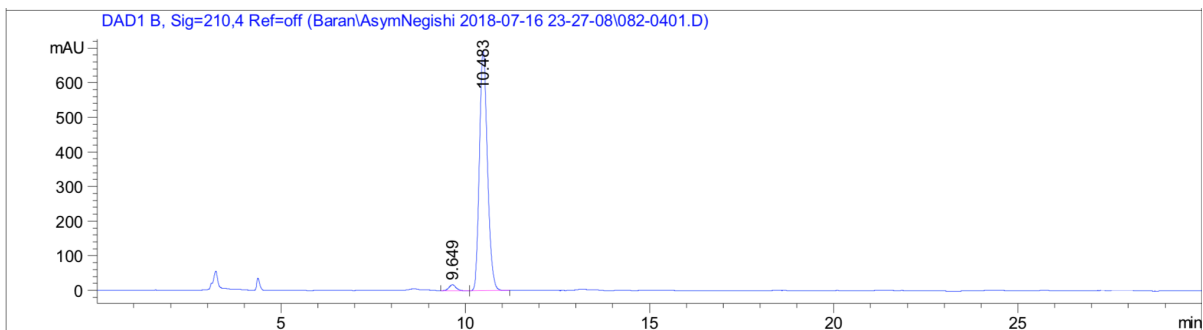

Signal 2: DAD1 B, Sig=210,4 Ref=off

| Peak # | RetTime [min] | Type | Width [min] | Area [mAU*s] | Height [mAU] | Area %  |
|--------|---------------|------|-------------|--------------|--------------|---------|
| 1      | 9.642         | BB   | 0.2290      | 1.77629e4    | 1212.16760   | 49.0036 |
| 2      | 10.483        | BV R | 0.2547      | 1.84853e4    | 1138.40784   | 50.9964 |

Signal 2: DAD1 B, Sig=210,4 Ref=off

| Peak # | RetTime [min] | Type | Width [min] | Area [mAU*s] | Height [mAU] | Area %  |
|--------|---------------|------|-------------|--------------|--------------|---------|
| 1      | 9.649         | BB   | 0.2077      | 236.43112    | 17.27503     | 2.1923  |
| 2      | 10.483        | BB   | 0.2356      | 1.05482e4    | 692.79028    | 97.8077 |

## Compound 65

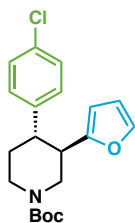

### *tert*-butyl (3*R*,4*S*)-4-(4-chlorophenyl)-3-(furan-2-yl)piperidine-1-carboxylate (**65**)

Following General Procedure **C1** on 0.1 mmol scale with **B15**, NiCl<sub>2</sub>•6H<sub>2</sub>O (30 mol%), BPhen (30 mol%), and boronic acid **SI-20** (3.0 equiv.). Purification by pTLC (silica, 6:1 Hexanes:EtOAc) afforded 27.1 mg (75%) of the title compound **65**.

**Physical State:** colorless oil

**<sup>1</sup>H NMR (600 MHz, CDCl<sub>3</sub>, both rotamers):** δ 7.20 (d, *J* = 1.8 Hz, 1H), 7.17 – 7.15 (m, 2H), 6.99 (d, *J* = 8.5 Hz, 2H), 6.11 (s, 1H), 5.76 (d, *J* = 3.2 Hz, 1H), 4.32 (s, 2H), 3.01 – 2.85 (m, 4H), 1.86 – 1.70 (m, 2H), 1.49 (s, 9H) ppm.

**<sup>13</sup>C NMR (151 MHz, CDCl<sub>3</sub>, both rotamers):** δ 154.7, 154.5, 142.4, 141.2, 132.1, 128.7, 128.6, 110.0, 106.5, 80.0, 48.9, 47.0, 44.2, 42.4, 33.7, 28.6 ppm.

**HRMS (ESI-TOF):** calc'd for C<sub>20</sub>H<sub>25</sub>ClNO<sub>3</sub> [M+H]<sup>+</sup>: 362.1523; found 362.1519.

**TLC:** R<sub>f</sub> = 0.4 (6:1 Hexanes:EtOAc).

**[α]<sub>D</sub><sup>20</sup>** = 17.1 (*c* = 0.5, CHCl<sub>3</sub>).

**Chiral HPLC:** Chiralpak IC, 4.6 x 250 mm; 10/90 *i*PrOH/hexanes, 0.5 mL/min, 210 nm; *t*<sub>R</sub> (minor) = 12.1 min, *t*<sub>R</sub> (major) = 16.0 min, 96% *ee*.

Racemic:

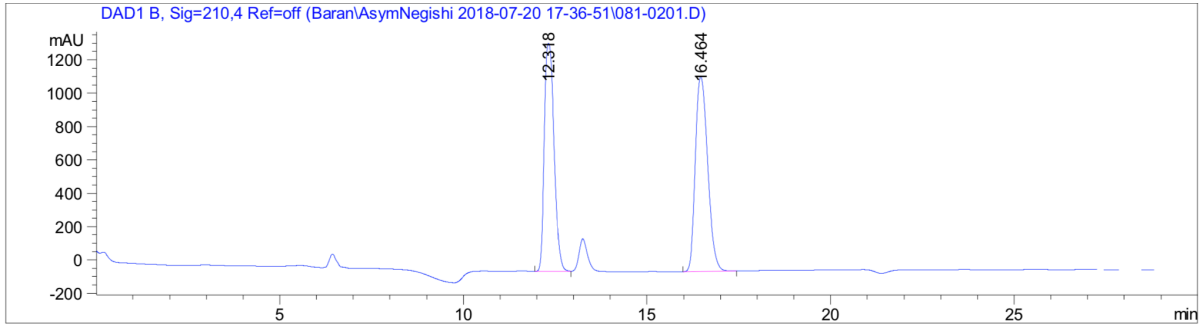

Enantioenriched **65**:

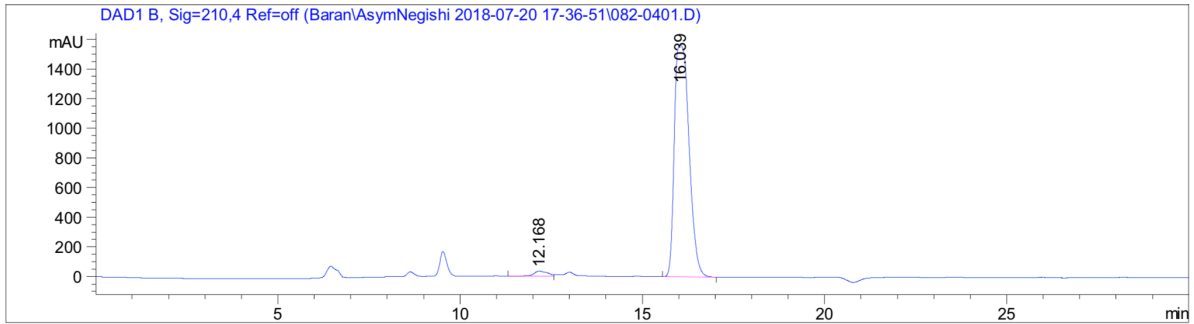

Signal 2: DAD1 B, Sig=210,4 Ref=off

| Peak # | RetTime [min] | Type | Width [min] | Area [mAU*s] | Height [mAU] | Area %  |
|--------|---------------|------|-------------|--------------|--------------|---------|
| 1      | 12.318        | BV   | 0.2909      | 2.51932e4    | 1367.85291   | 48.0279 |
| 2      | 16.464        | BB   | 0.3680      | 2.72621e4    | 1169.43884   | 51.9721 |

Signal 2: DAD1 B, Sig=210,4 Ref=off

| Peak # | RetTime [min] | Type | Width [min] | Area [mAU*s] | Height [mAU] | Area %  |
|--------|---------------|------|-------------|--------------|--------------|---------|
| 1      | 12.168        | BV   | 0.3780      | 894.88928    | 33.45746     | 1.9937  |
| 2      | 16.039        | BB   | 0.4439      | 4.39906e4    | 1565.07227   | 98.0063 |

## Experimental Procedures and Characterization Data for Morpholine Scaffolds (Figure 3–e)

### Compound SI-3

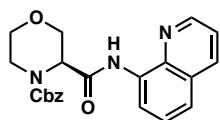

### benzyl (*S*)-3-(quinolin-8-ylcarbonyl)morpholine-4-carboxylate (SI-3)

Following General Procedure A4 on 10.0 mmol scale. Purification by flash column chromatography (silica, 5:1 Hexanes:EtOAc) afforded 2.89 g (74%) of the title compound **SI-3**.

**Physical State:** yellow oil.

**<sup>1</sup>H NMR (600 MHz, CDCl<sub>3</sub>, both rotamers):**  $\delta$  10.44 (s, 1H), 8.89 – 8.61 (m, 2H), 8.16 (dd,  $J$  = 8.2, 1.7 Hz, 1H), 7.56 – 7.42 (m, 7H), 7.37 – 7.13 (m, 2H), 5.39 – 5.25 (m, 2H), 4.91 – 4.69 (m, 2H), 4.15 – 3.92 (m, 2H), 3.65 (d,  $J$  = 86.8 Hz, 3H) ppm.

**<sup>13</sup>C NMR (151 MHz, CDCl<sub>3</sub>, both rotamers):**  $\delta$  167.6, 156.3, 155.6, 148.6, 138.7, 136.4, 136.1, 134.0, 128.7, 128.3, 128.1, 128.0, 127.4, 122.1, 121.8, 116.8, 68.2, 67.0, 66.6, 56.7, 56.1, 42.2, 41.6 ppm.

**HRMS (ESI-TOF):** calc'd for C<sub>22</sub>H<sub>22</sub>N<sub>3</sub>O<sub>4</sub> [M+H]<sup>+</sup>: 392.1610; found 392.1613.

**TLC:** R<sub>f</sub> = 0.3 (3:1 Hexanes:EtOAc).

**[ $\alpha$ ]<sub>D</sub><sup>20</sup>** = -118.7 ( $c$  = 1.0, CHCl<sub>3</sub>).

**Chiral HPLC:** Chiralpak IA, 4.6 x 250 mm; 20/80 *i*PrOH/hexanes, 1 mL/min, 210 nm;  $t_R$  (minor) = 23.5 min,  $t_R$  (major) = 15.5 min, 98% *ee*.

Racemic:

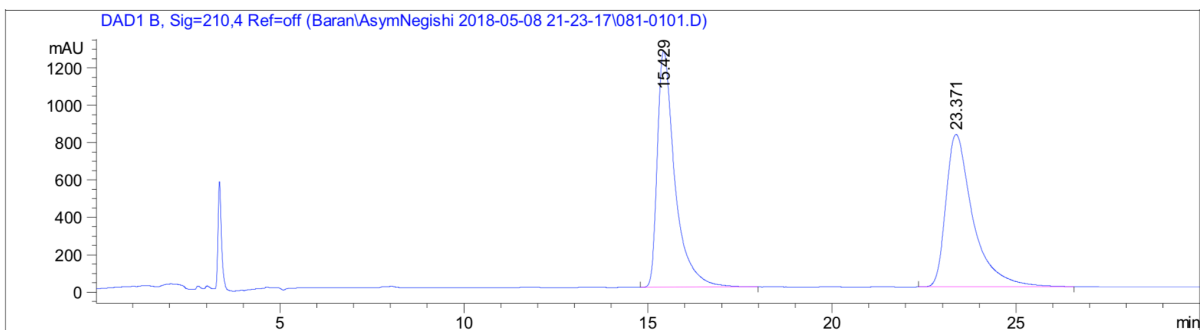

Enantioenriched SI-3:

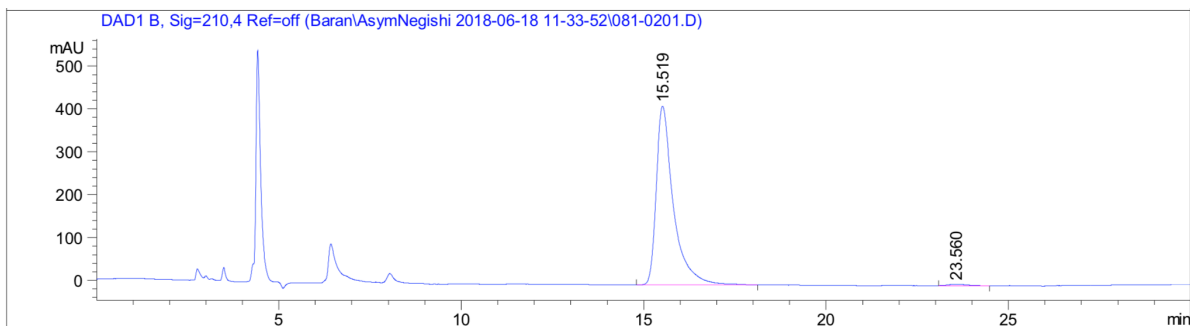

Signal 2: DAD1 B, Sig=210,4 Ref=off

| Peak # | RetTime [min] | Type | Width [min] | Area [mAU*s] | Height [mAU] | Area %  |
|--------|---------------|------|-------------|--------------|--------------|---------|
| 1      | 15.429        | BB   | 0.4923      | 4.21515e4    | 1266.32910   | 50.2469 |
| 2      | 23.371        | BB   | 0.7402      | 4.17372e4    | 816.74042    | 49.7531 |

Signal 2: DAD1 B, Sig=210,4 Ref=off

| Peak # | RetTime [min] | Type | Width [min] | Area [mAU*s] | Height [mAU] | Area %  |
|--------|---------------|------|-------------|--------------|--------------|---------|
| 1      | 15.519        | BB   | 0.4765      | 1.36810e4    | 417.28632    | 99.0833 |
| 2      | 23.560        | BB   | 0.4666      | 126.57509    | 3.24821      | 0.9167  |



## Compound SI-4

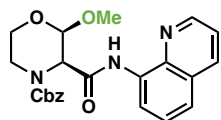

### benzyl (2*R*,3*S*)-2-methoxy-3-(quinolin-8-ylcarbamoyl)morpholine-4-carboxylate (SI-5)

Following General Procedure A4 on 1.68 mmol scale with **SI-3**. Purification by flash column chromatography (silica, 2:1 Hexanes:EtOAc) afforded 297 mg (51%) of the title compound **SI-4**.

**Physical State:** yellow oil.

**<sup>1</sup>H NMR (600 MHz, CDCl<sub>3</sub>, both rotamers):** δ 10.52 (s, 1H), 8.84 – 8.58 (m, 2H), 8.16 (d, *J* = 8.2 Hz, 1H), 7.55 (d, *J* = 4.4 Hz, 2H), 7.47 – 7.14 (m, 6H), 5.49 – 5.22 (m, 3H), 5.23 – 5.03 (m, 1H), 4.26 – 3.98 (m, 2H), 3.63 – 3.40 (m, 5H) ppm.

**<sup>13</sup>C NMR (151 MHz, CDCl<sub>3</sub>, both rotamers):** δ 166.2, 156.5, 156.1, 148.8, 148.6, 138.7, 136.4, 136.3, 133.8, 133.7, 128.7, 128.5, 128.3, 128.1, 128.0, 127.7, 127.4, 127.4 – 127.3 (m), 122.3, 122.2, 121.8, 121.8, 116.8, 96.1, 95.6, 68.2, 68.1, 59.9, 59.1, 57.3, 57.2, 55.3, 55.1, 53.6, 41.4, 40.7 ppm.

**HRMS (ESI-TOF):** calc'd for C<sub>23</sub>H<sub>24</sub>N<sub>3</sub>O<sub>5</sub> [M+H]<sup>+</sup>: 422.1716; found 422.1714.

**TLC:** R<sub>f</sub> = 0.2 (1:1 Hexanes:EtOAc).

**[α]<sub>D</sub><sup>20</sup>** = -31.6 (*c* = 1.0, CHCl<sub>3</sub>).

**Chiral HPLC:** Chiralpak IA, 4.6 x 250 mm; 30/70 *i*PrOH/hexanes, 1 mL/min, 254 nm; *t*<sub>R</sub> (minor) = 13.1 min, *t*<sub>R</sub> (major) = 9.2 min, 97% *ee*.

Racemic:

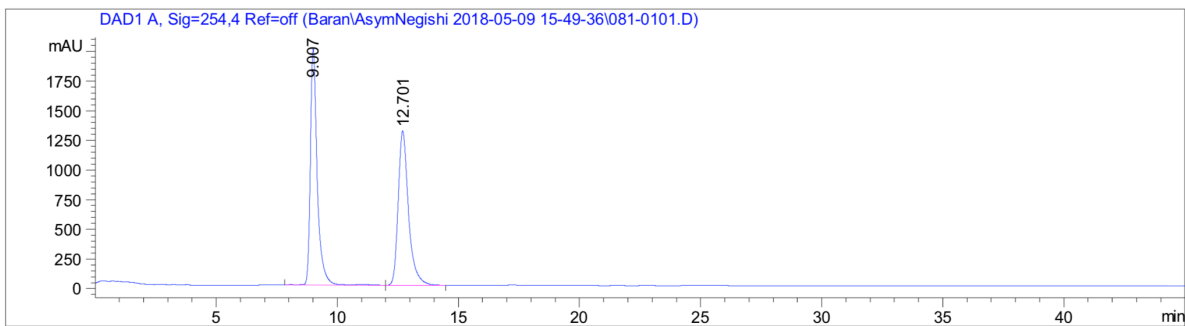

Enantioenriched SI-4:

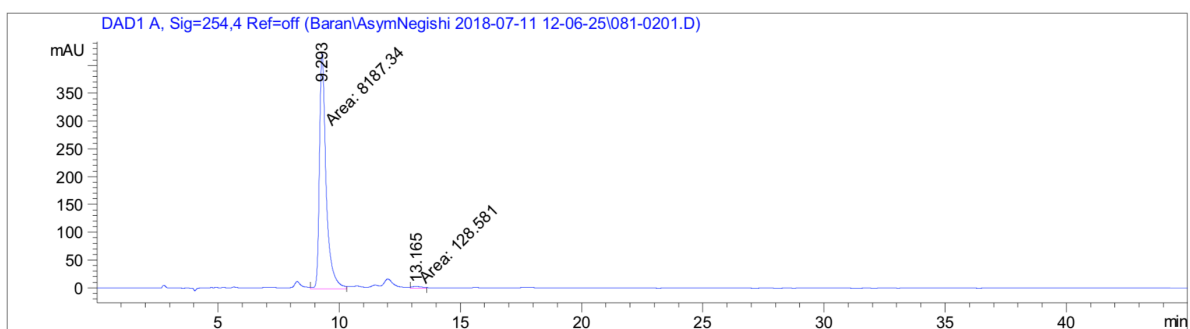

Signal 1: DAD1 A, Sig=254,4 Ref=off

| Peak # | RetTime [min] | Type | Width [min] | Area [mAU*s] | Height [mAU] | Area %  |
|--------|---------------|------|-------------|--------------|--------------|---------|
| 1      | 9.007         | VV R | 0.2935      | 3.95174e4    | 1991.41882   | 50.6407 |
| 2      | 12.701        | BB   | 0.4452      | 3.85176e4    | 1301.78955   | 49.3593 |

Signal 1: DAD1 A, Sig=254,4 Ref=off

| Peak # | RetTime [min] | Type | Width [min] | Area [mAU*s] | Height [mAU] | Area %  |
|--------|---------------|------|-------------|--------------|--------------|---------|
| 1      | 9.293         | MM   | 0.3216      | 8187.34424   | 424.35239    | 98.4538 |
| 2      | 13.165        | MM   | 0.5276      | 128.58076    | 4.06177      | 1.5462  |

## Compound B16

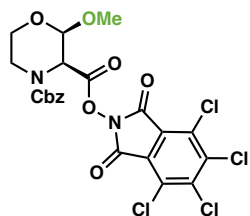

### 4-benzyl 3-(4,5,6,7-tetrachloro-1,3-dioxisoindolin-2-yl) (2*R*,3*S*)-2-methoxymorpholine-3,4-dicarboxylate (**B16**)

Following General Procedure **A4** on 1.73 mmol scale. Purification by flash column chromatography (silica, 2:1 Hexanes:EtOAc) afforded 730 mg (73%) of the title compound **B16**.

**Physical State:** yellow oil.

**<sup>1</sup>H NMR (600 MHz, CDCl<sub>3</sub>, both rotamers):** δ 7.41 – 7.29 (m, 5H), 5.31 – 5.10 (m, 4H), 4.06 – 3.87 (m, 2H), 3.69 – 3.39 (m, 2H), 3.46 – 3.44 (m, 3H) ppm.

**<sup>13</sup>C NMR (151 MHz, CDCl<sub>3</sub>, both rotamers):** δ 165.2, 165.1, 157.1, 156.0, 155.4, 141.4, 141.3, 136.0, 136.0, 130.8, 130.8, 128.7, 128.4, 128.3, 128.3, 128.2, 128.1, 124.7, 95.7, 95.1, 68.3, 68.3, 57.7, 57.5, 56.9, 56.3, 55.4, 55.3, 40.9, 40.2 ppm.

**HRMS (ESI-TOF):** calc'd for C<sub>22</sub>H<sub>17</sub>Cl<sub>4</sub>N<sub>2</sub>O<sub>8</sub> [M+H]<sup>+</sup>: 576.9739; found 576.9741.

**TLC:** R<sub>f</sub> = 0.3 (1:1 Hexanes:EtOAc).

**[α]<sub>D</sub><sup>20</sup>** = -9.2 (*c* = 1.0, CHCl<sub>3</sub>).

**Chiral HPLC:** Chiralpak IC, 4.6 x 250 mm; 45/55 *i*PrOH/hexanes, 1 mL/min, 254 nm; *t*<sub>R</sub> (minor) = 22.4 min, *t*<sub>R</sub> (major) = 31.7 min, >99% *ee*.

Racemic:

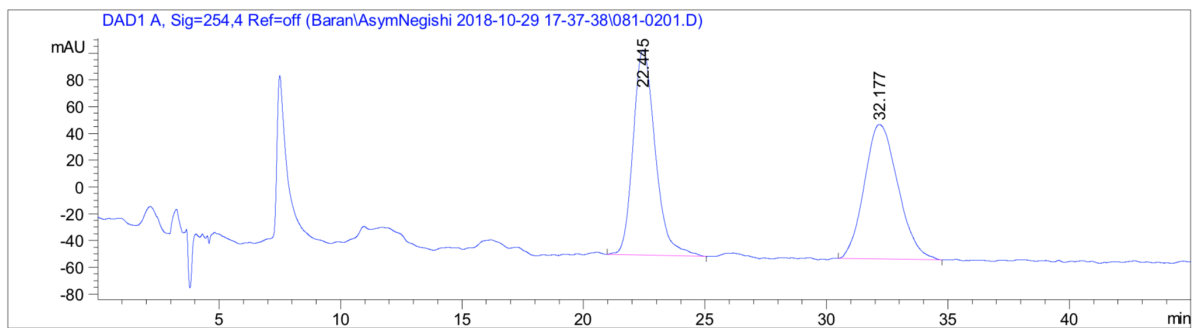

Enantioenriched B16:

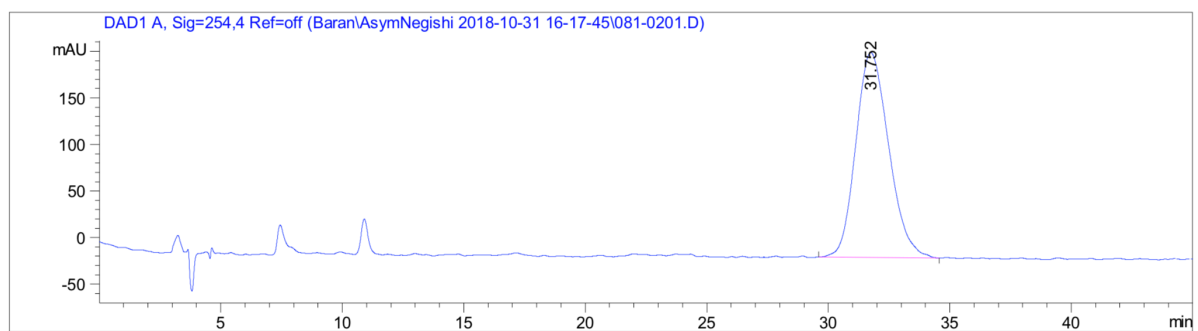

Signal 1: DAD1 A, Sig=254,4 Ref=off

| Peak # | RetTime [min] | Type | Width [min] | Area [mAU*s] | Height [mAU] | Area %  |
|--------|---------------|------|-------------|--------------|--------------|---------|
| 1      | 22.445        | BB   | 0.9743      | 9761.04199   | 153.40486    | 50.2138 |
| 2      | 32.177        | BB   | 1.4082      | 9677.91309   | 100.43898    | 49.7862 |

Signal 1: DAD1 A, Sig=254,4 Ref=off

| Peak # | RetTime [min] | Type | Width [min] | Area [mAU*s] | Height [mAU] | Area %   |
|--------|---------------|------|-------------|--------------|--------------|----------|
| 1      | 31.752        | BB   | 1.4007      | 2.07725e4    | 220.18013    | 100.0000 |

## Compound 66

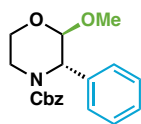

### benzyl (2*R*,3*S*)-2-methoxy-3-phenylmorpholine-4-carboxylate (**66**)

Following General Procedure C4 on 0.1 mmol scale with **B16**, NiCl<sub>2</sub>•glyme (30 mol%), di*t*BuBipy (40 mol%), and Zinc reagent **SI-35** (2.0 equiv.). Purification by pTLC (silica, 4:1 Hexanes:EtOAc) afforded 19.9 mg (61%) of the title compound **66**.

**Physical State:** colorless oil

**<sup>1</sup>H NMR (600 MHz, CDCl<sub>3</sub>, both rotamers)** δ 7.52 – 7.28 (m, 10H), 5.25 – 5.13 (m, 3H), 4.98 (s, 1H), 4.04 (t, *J* = 11.6 Hz, 1H), 3.88 (s, 1H), 3.60 (d, *J* = 9.3 Hz, 1H), 3.44 (s, 3H), 3.20 (t, *J* = 14.4 Hz, 1H) ppm.

**<sup>13</sup>C NMR (151 MHz, CDCl<sub>3</sub>, both rotamers)** δ 156.0, 137.4, 136.7, 128.7, 128.6, 128.2, 128.1, 128.0, 127.8, 98.0, 67.6, 58.3, 57.1, 54.8, 38.9 ppm.

**HRMS (ESI-TOF):** calc'd for C<sub>19</sub>H<sub>22</sub>NO<sub>4</sub> [M+H]<sup>+</sup>: 328.1549; found 328.1544.

**TLC:** R<sub>f</sub> = 0.3 (4:1 Hexanes:EtOAc).

**[α]<sub>D</sub><sup>20</sup>** = -28.6 (*c* = 1.0, CHCl<sub>3</sub>).

**Chiral HPLC:** Chiralpak IC, 4.6 x 250 mm; 10/90 *i*PrOH/hexanes, 1 mL/min, 210 nm; *t*<sub>R</sub> (minor) = 9.6 min, *t*<sub>R</sub> (major) = 10.4 min, 96% *ee*.

Racemic:

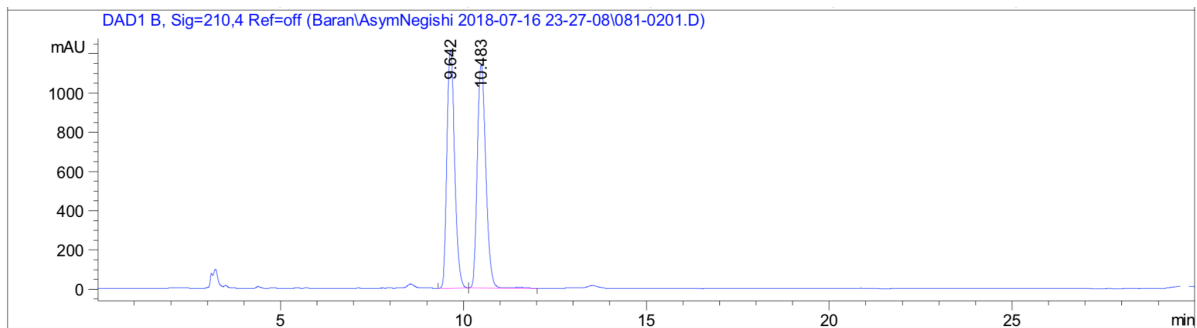

Enantioenriched **66**:

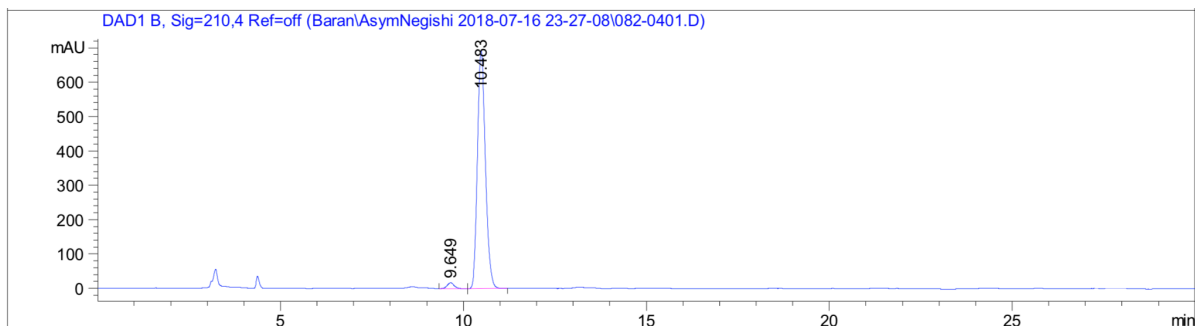

Signal 2: DAD1 B, Sig=210,4 Ref=off

| Peak # | RetTime [min] | Type | Width [min] | Area [mAU*s] | Height [mAU] | Area %  |
|--------|---------------|------|-------------|--------------|--------------|---------|
| 1      | 9.642         | BB   | 0.2290      | 1.77629e4    | 1212.16760   | 49.0036 |
| 2      | 10.483        | BV R | 0.2547      | 1.84853e4    | 1138.40784   | 50.9964 |

Signal 2: DAD1 B, Sig=210,4 Ref=off

| Peak # | RetTime [min] | Type | Width [min] | Area [mAU*s] | Height [mAU] | Area %  |
|--------|---------------|------|-------------|--------------|--------------|---------|
| 1      | 9.649         | BB   | 0.2077      | 236.43112    | 17.27503     | 2.1923  |
| 2      | 10.483        | BB   | 0.2356      | 1.05482e4    | 692.79028    | 97.8077 |

## Compound 67

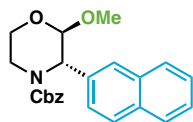

### benzyl (2*R*,3*S*)-2-methoxy-3-(naphthalen-2-yl)morpholine-4-carboxylate (67)

Following General Procedure **C1** on 0.088 mmol scale with **B16**, NiCl<sub>2</sub>•6H<sub>2</sub>O (30 mol%), BPhen (30 mol%), and boronic acid **SI-11** (3.0 equiv.). Purification by pTLC (silica, 6:1 Hexanes:EtOAc) afforded 20.1 mg (60%) of the title compound **67**.

**Physical State:** colorless oil

**<sup>1</sup>H NMR (600 MHz, CDCl<sub>3</sub>, both rotamers):** δ 7.94 (s, 1H), 7.81 (d, *J* = 19.5 Hz, 3H), 7.56 (s, 1H), 7.49 (d, *J* = 9.3 Hz, 2H), 7.36 – 7.31 (m, 5H), 5.40 (s, 1H), 5.30 – 5.08 (m, 3H), 4.09 (t, *J* = 11.8 Hz, 1H), 3.92 (s, 1H), 3.65 (d, *J* = 9.6 Hz, 1H), 3.49 (s, 3H), 3.24 (td, *J* = 13.4, 3.7 Hz, 1H) ppm.

**<sup>13</sup>C NMR (151 MHz, CDCl<sub>3</sub>, both rotamers):** δ 156.0, 136.6, 134.8, 133.2, 132.9, 128.6, 128.4, 128.3, 128.2, 128.1, 127.7, 127.1, 126.3, 126.3, 97.9, 67.7, 58.4, 57.0, 54.9, 39.0 ppm.

**HRMS (ESI-TOF):** calc'd for C<sub>23</sub>H<sub>24</sub>NO<sub>4</sub> [M+H]<sup>+</sup>: 378.1705; found 378.1704.

**TLC:** R<sub>f</sub> = 0.4 (4:1 Hexanes:EtOAc).

**[α]<sub>D</sub><sup>20</sup>** = -68.9 (*c* = 1.0, CHCl<sub>3</sub>).

**Chiral HPLC:** Chiralpak IC, 4.6 x 250 mm; 10/90 *i*PrOH/hexanes, 1 mL/min, 210 nm; *t*<sub>R</sub> (minor) = 12.1 min, *t*<sub>R</sub> (major) = 13.2 min, 97% *ee*.

Racemic:

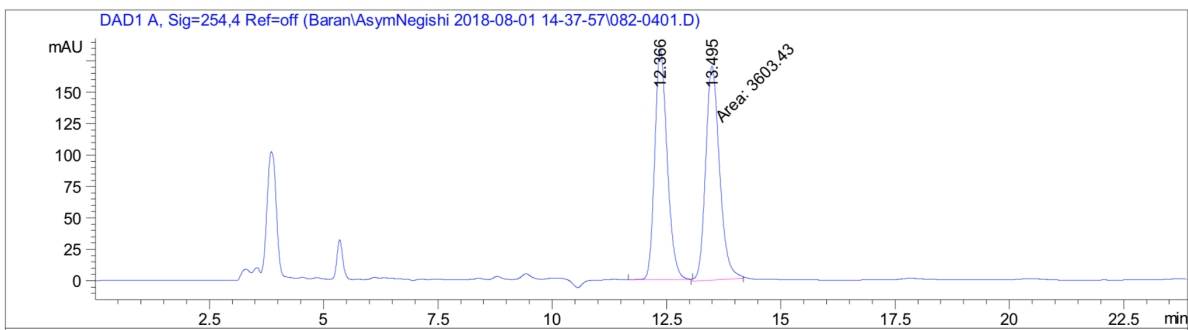

Enantioenriched **67**:

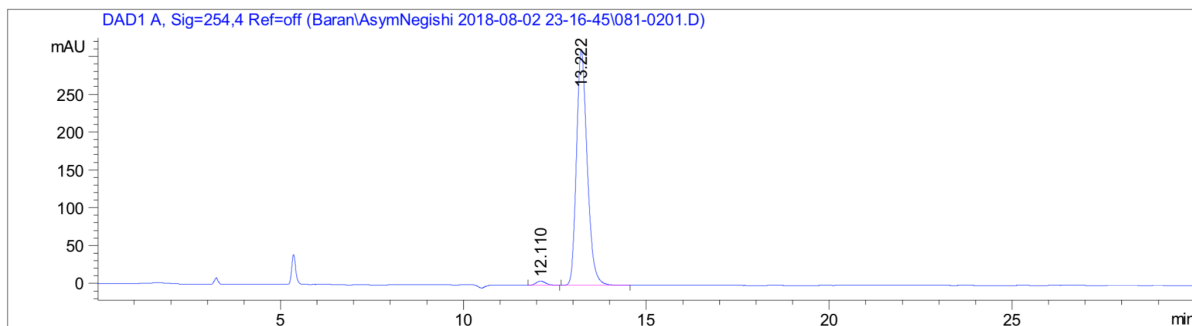

Signal 1: DAD1 A, Sig=254,4 Ref=off

| Peak # | RetTime [min] | Type | Width [min] | Area [mAU*s] | Height [mAU] | Area %  |
|--------|---------------|------|-------------|--------------|--------------|---------|
| 1      | 12.366        | BV   | 0.2919      | 3479.83203   | 182.94949    | 49.1275 |
| 2      | 13.495        | MM   | 0.3530      | 3603.42822   | 170.14580    | 50.8725 |

Signal 1: DAD1 A, Sig=254,4 Ref=off

| Peak # | RetTime [min] | Type | Width [min] | Area [mAU*s] | Height [mAU] | Area %  |
|--------|---------------|------|-------------|--------------|--------------|---------|
| 1      | 12.110        | BB   | 0.2719      | 98.36753     | 5.57500      | 1.5255  |
| 2      | 13.222        | BB   | 0.3139      | 6349.83545   | 311.41013    | 98.4745 |



## Compound 68

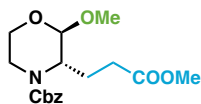

### benzyl (2*R*,3*S*)-2-methoxy-3-(3-methoxy-3-oxopropyl)morpholine-4-carboxylate (**68**)

Following General Procedure **C8** on 0.095 mmol scale with methyl acrylate. Purification by pTLC (silica, 3:1 Hexanes:EtOAc) afforded 12.5 mg (39%) of the title compound **68**.

**Physical State:** colorless oil

**<sup>1</sup>H NMR (600 MHz, CDCl<sub>3</sub>, both rotamers):** δ 7.37 – 7.31 (m, 5H), 5.16 – 5.11 (m, 2H), 4.44 – 4.38 (m, 1H), 4.18 – 4.09 (m, 1H), 3.94 – 3.80 (m, 2H), 3.64 – 3.47 (m, 4H), 3.35 (s, 3H), 3.22 – 3.12 (m, 1H), 2.37 – 2.28 (m, 2H), 2.21 – 2.12 (m, 1H), 1.87 – 1.81 (m, 1H) ppm.

**<sup>13</sup>C NMR (151 MHz, CDCl<sub>3</sub>, both rotamers):** δ 173.6, 173.3, 156.1, 155.9, 136.7, 128.6, 128.2, 128.1, 127.9, 98.6, 98.3, 67.5, 57.9, 57.8, 54.9, 54.7, 54.2, 53.6, 51.8, 38.6, 37.9, 30.4, 30.2, 23.8 ppm.

**HRMS (ESI-TOF):** calc'd for C<sub>17</sub>H<sub>24</sub>NO<sub>6</sub> [M+H]<sup>+</sup>: 338.1604; found 338.1603.

**TLC:** R<sub>f</sub> = 0.3 (4:1 Hexanes:EtOAc).

**[α]<sub>D</sub><sup>20</sup>** = 16.2 (*c* = 0.33, CHCl<sub>3</sub>).

**Chiral HPLC:** Chiralpak IA, 4.6 x 250 mm; 10/90 *i*PrOH/hexanes, 0.5 mL/min, 210 nm; *t*<sub>R</sub> (minor) = 25.4 min, *t*<sub>R</sub> (major) = 26.7 min, 97% *ee*.

Racemic:

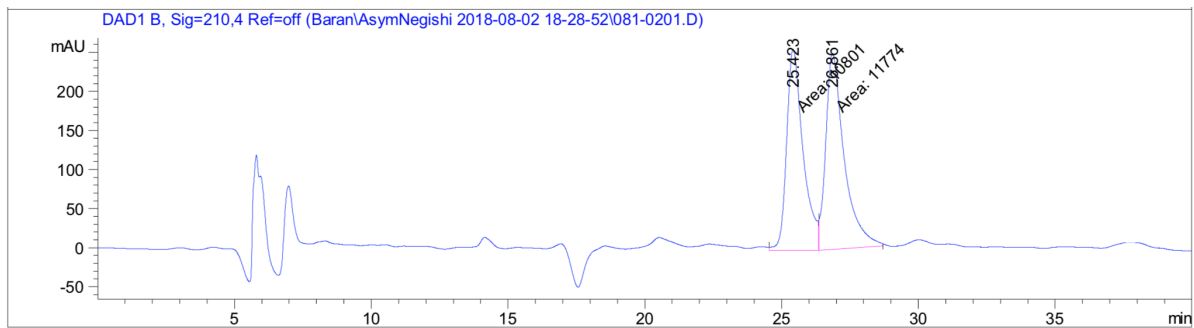

Enantioenriched **68**:

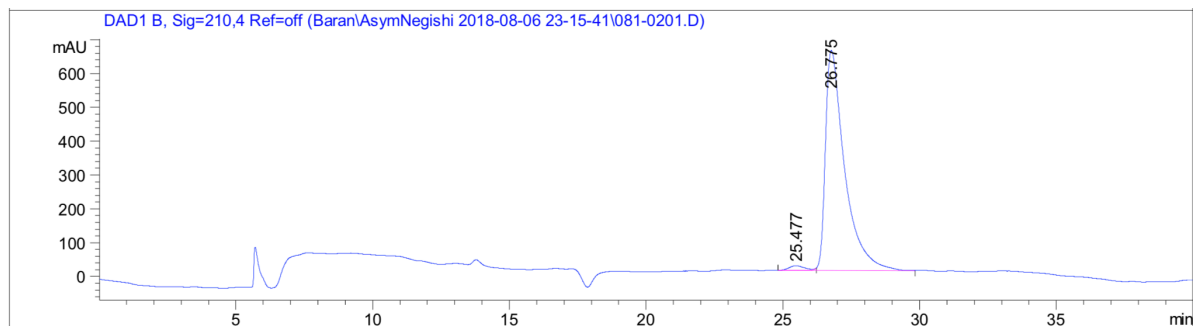

Signal 2: DAD1 B, Sig=210,4 Ref=off

| Peak # | RetTime [min] | Type | Width [min] | Area [mAU*s] | Height [mAU] | Area %  |
|--------|---------------|------|-------------|--------------|--------------|---------|
| 1      | 25.423        | MM   | 0.6993      | 1.08010e4    | 257.40671    | 47.8450 |
| 2      | 26.861        | MM   | 0.7828      | 1.17740e4    | 250.69632    | 52.1550 |

Signal 2: DAD1 B, Sig=210,4 Ref=off

| Peak # | RetTime [min] | Type | Width [min] | Area [mAU*s] | Height [mAU] | Area %  |
|--------|---------------|------|-------------|--------------|--------------|---------|
| 1      | 25.477        | BV E | 0.4636      | 526.85687    | 13.85538     | 1.6308  |
| 2      | 26.775        | VB R | 0.7064      | 3.17800e4    | 650.05908    | 98.3692 |

## Experimental Procedures and Characterization Data for hit-to-lead candidates and late-stage intermediates (Figure 4)

### Compound SI-42

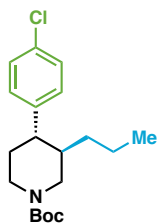

#### *tert*-butyl (3*R*,4*S*)-4-(4-chlorophenyl)-3-propylpiperidine-1-carboxylate (SI-42)

Following General Procedure C2 on 0.2 mmol scale with **B14**, NiCl<sub>2</sub>•glyme (30 mol%), di*t*BuBipy (40 mol%), and Zinc reagent **SI-51** (2.0 equiv.). Purification by pTLC (silica, 10:1 Hexanes: EtOAc) afforded 41.1 mg (61%) of the title compound **SI-42**.

**Physical State:** colorless oil

**<sup>1</sup>H NMR (600 MHz, CDCl<sub>3</sub>, both rotamers):** δ 7.27 (d, *J* = 5.5 Hz, 2H), 7.08 (d, *J* = 8.4 Hz, 2H), 4.28 – 4.19 (m, 2H), 2.75 (s, 1H), 2.38 (s, 1H), 2.26 (td, *J* = 11.6, 3.8 Hz, 1H), 1.71 (d, *J* = 12.0 Hz, 1H), 1.61 – 1.59 (m, 2H), 1.49 (s, 9H), 1.34 – 1.28 (m, 1H), 1.14 – 1.05 (m, 2H), 0.93 – 0.84 (m, 1H), 0.75 (t, *J* = 7.0 Hz, 3H) ppm.

**<sup>13</sup>C NMR (151 MHz, CDCl<sub>3</sub>, both rotamers):** δ 154.9, 143.3, 132.0, 129.0, 128.8, 79.6, 49.4, 49.0, 44.6, 40.9, 34.8, 33.5, 28.6, 19.6, 14.3 ppm.

**HRMS (ESI-TOF):** calc'd for C<sub>14</sub>H<sub>19</sub>ClN [M-Boc + H]<sup>+</sup>: 238.1363; found 238.1362.

**TLC:** R<sub>f</sub> = 0.3 (6:1 hexanes:EtOAc).

**[α]<sub>D</sub><sup>20</sup>** = 11.6 (*c* = 0.5, CHCl<sub>3</sub>).

**Chiral HPLC:** Chiralpak IC, 4.6 x 250 mm; 10/90 *i*PrOH/hexanes, 0.5 mL/min, 210 nm; *t*R (minor) = 9.7 min, *t*R (major) = 11.0 min, 97% *ee*.

Racemic:

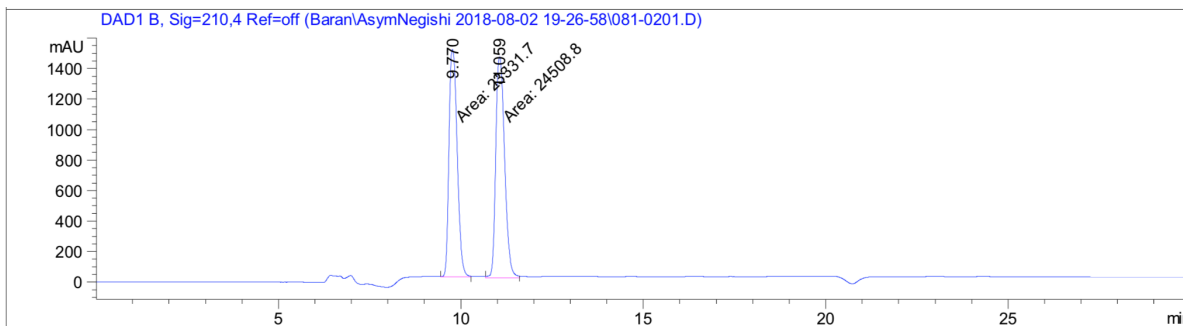

Enantioenriched SI-42:

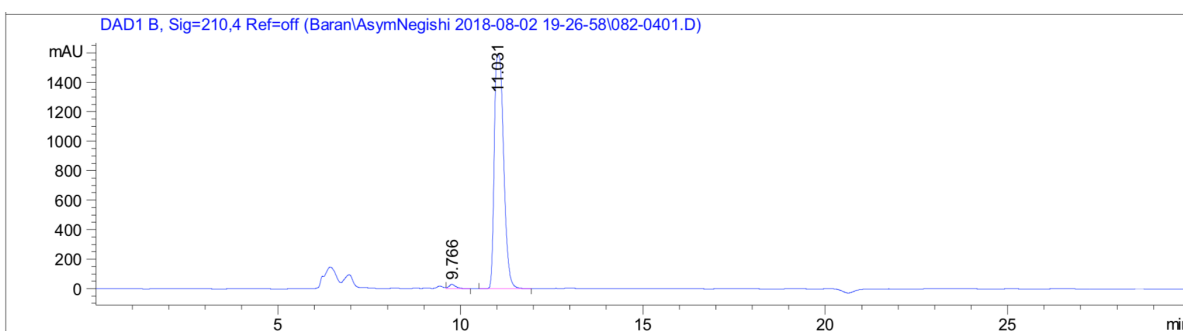

Signal 2: DAD1 B, Sig=210,4 Ref=off

| Peak # | RetTime [min] | Type | Width [min] | Area [mAU*s] | Height [mAU] | Area %  |
|--------|---------------|------|-------------|--------------|--------------|---------|
| 1      | 9.770         | MM   | 0.2609      | 2.33317e4    | 1490.33911   | 48.7698 |
| 2      | 11.059        | MM   | 0.2817      | 2.45088e4    | 1450.12830   | 51.2302 |

Signal 2: DAD1 B, Sig=210,4 Ref=off

| Peak # | RetTime [min] | Type | Width [min] | Area [mAU*s] | Height [mAU] | Area %  |
|--------|---------------|------|-------------|--------------|--------------|---------|
| 1      | 9.766         | VB   | 0.1911      | 383.43439    | 29.21444     | 1.3378  |
| 2      | 11.031        | BB   | 0.2818      | 2.82785e4    | 1587.65710   | 98.6622 |

## Compound 69

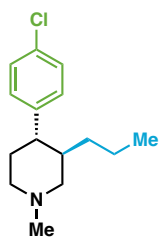

### (3*R*,4*S*)-4-(4-chlorophenyl)-1-methyl-3-propylpiperidine (69)

To a culture tube was added **SI-42** (29.0 mg, 0.086 mmol, 1 equiv.), evacuated and backfilled with argon three times and followed by adding 2 mL HCl in dioxane (4 M). Then the solution was stirred at room temperature for 6 hours. Upon completion, the solvent was removed *in vacuo*. To the same culture were added 36.5% HCHO in H<sub>2</sub>O (10.7 mg, 0.129 mmol, 1.5 equiv.), NaBH(OAc)<sub>3</sub> (36.5 mg, 0.172 mmol, 2 equiv.), HOAc (10.3 mg, 0.172 mmol, 2 equiv.) and CH<sub>2</sub>Cl<sub>2</sub> (2 mL). Then the resulting mixture was stirred at room temperature for 12h. Upon completion, a saturated solution of aq. NaHCO<sub>3</sub> (10 mL) was added to quench the reaction. The mixture was then extracted with EtOAc (3x). The combined organic layers were dried over Na<sub>2</sub>SO<sub>4</sub>, filtered and purified by PTLC (silica, 10:1 EtOAc:MeOH) afforded 16.2 mg (75%) of the title compound **69**.

**Physical State:** colorless oil

**<sup>1</sup>H NMR (600 MHz, CDCl<sub>3</sub>)** δ 7.25 (d, *J* = 8.2 Hz, 2H), 7.10 (d, *J* = 8.1 Hz, 2H), 3.07 (ddd, *J* = 11.3, 3.7, 1.7 Hz, 1H), 2.94 (ddt, *J* = 11.4, 4.0, 2.1 Hz, 1H), 2.33 (s, 3H), 2.09 (td, *J* = 11.3, 4.5 Hz, 1H), 1.99 (td, *J* = 11.5, 3.2 Hz, 1H), 1.84 – 1.74 (m, 3H), 1.67 (t, *J* = 11.1 Hz, 1H), 1.32 – 1.26 (m, 1H), 1.10 – 1.03 (m, 2H), 0.91 – 0.85 (m, 1H), 0.73 (t, *J* = 7.1 Hz, 3H) ppm.

**<sup>13</sup>C NMR (151 MHz, CDCl<sub>3</sub>)** δ 143.9, 131.8, 129.1, 128.7, 61.7, 56.4, 48.3, 46.6, 40.9, 35.1, 34.1, 19.8, 14.3 ppm.

**HRMS (ESI-TOF):** calc'd for C<sub>15</sub>H<sub>23</sub>ClN [M+H]<sup>+</sup>: 252.1519; found 252.1517.

**TLC:** R<sub>f</sub> = 0.3 (10:1 EtOAc:MeOH).

**[α]<sub>D</sub><sup>20</sup>** = 31.8 (*c* = 0.5, CHCl<sub>3</sub>).

## Compound SI-43

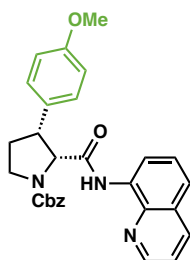

### Benzyl (2*R*,3*R*)-3-(4-methoxyphenyl)-2-[(quinolin-8-yl)carbamoyl]pyrrolidine-1-carboxylate, Compound (SI-43)

A reaction tube was charged with benzyl (2*R*)-2-[(quinolin-8-yl)carbamoyl]pyrrolidine-1-carboxylate **1** (1.89 g, 5.00 mmol, 1.0 equiv), AgOAc (1.51 g, 9.00 mmol 1.8 equiv), 4-iodoanisole (2.12 g, 9.00 mmol, 1.8 equiv) and Pd(OAc)<sub>2</sub> (55.3 mg, 19.7 μmol, 5 mol%). The reaction vessel was purged with argon and sealed, then placed in an oil bath (preheated to 110 °C) for 14 hours. The reaction mixture was then allowed to cool to room temperature and EtOAc (30 mL) was added. The resulting solution was filtered through a pad of Celite<sup>®</sup>, eluting with further EtOAc (2 x 30 mL). The solvent was removed under reduced pressure, and the crude material was purified by flash column chromatography (silica, 7:3 Et<sub>2</sub>O:Hexanes), affording arylated compound **SI-43** (2.22 g, 92%) as a white solid.

**Physical state:** White solid

**m.p.:** 115-117 °C

**<sup>1</sup>H NMR (600 MHz, CDCl<sub>3</sub>, both rotamers):** δ 9.51 (s, 1H), 8.63 (s, 1H), 8.52 (d, *J* = 8.1 Hz, 1H), 8.08 (d, *J* = 8.3 Hz, 1H), 7.52 – 7.29 (m, 5H), 7.18 (m, 3H), 6.95 (t, *J* = 7.5 Hz, 2H), 6.60 (d, *J* = 8.2 Hz, 2H), 5.39 – 4.95 (m, 2H), 4.70 (d, *J* = 8.4 Hz, 1H), 4.11 (t, *J* = 7.3 Hz, 1H), 3.88 – 3.59 (m, 2H), 3.48 (s, 3H), 2.73 (m, 1H), 2.20 (m, 1H) ppm.

**<sup>13</sup>C NMR (151 MHz, CDCl<sub>3</sub>, both rotamers):** δ 168.9, 168.8, 158.2, 155.1, 154.7, 148.1, 148.0, 138.4, 136.9, 136.5, 136.1, 136.0, 134.0, 133.9, 129.1, 128.6, 128.5, 128.1, 128.1, 128.0, 127.8, 127.7, 127.6, 127.3, 127.2, 121.6, 121.6, 121.4, 116.5, 113.9, 67.4, 67.2, 66.7, 66.5, 66.2, 55.1, 48.3, 47.4, 46.8, 45.4, 28.8, 28.2 ppm.

**TLC:** R<sub>f</sub> = 0.85 (100% EtOAc)

**HRMS (ESI-TOF) calc'd for C<sub>29</sub>H<sub>28</sub>N<sub>3</sub>O<sub>4</sub> [M+H]<sup>+</sup> 482.2080; Found 482.2077.**

**[α]<sub>D</sub><sup>20</sup> = 10.3° (c 2.0, CHCl<sub>3</sub>);**

## Compound A13

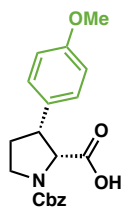

### (2*R*,3*R*)-1-((benzyloxy)carbonyl)-3-(4-methoxyphenyl)pyrrolidine-2-carboxylic acid (A13)

A flame-dried reaction tube was charged with benzyl (2*R*,3*R*)-3-(4-methoxyphenyl)-2-[(quinolin-8-yl)carbamoyl]pyrrolidine-1-carboxylate (964 mg, 2.00 mmol, 1 equiv.), followed by di-*tert*-butyl dicarbonate (2.18 g, 10.0 mmol, 5 equiv.) and 4-(dimethylamino)pyridine (DMAP, 48.7 mg, 0.4 mmol, 0.2 equiv.). The reaction vessel was sealed and purged with argon, then MeCN (3.3 mL, 0.6 M) was added by syringe. The reaction tube was then placed in an oil bath and gradually warm up to 70 °C. The reaction mixture was then stirred at 70 °C for 24 h. The reaction mixture was then allowed to cool to room temperature and sat. aq. NH<sub>4</sub>Cl (6 mL) and CH<sub>2</sub>Cl<sub>2</sub> (6 mL) were added. The phases were separated, and the aqueous layer was extracted with CH<sub>2</sub>Cl<sub>2</sub> (3 × 6 mL). The combined organic extracts were dried over Na<sub>2</sub>SO<sub>4</sub> and filtered. The solvent was removed *in vacuo* to afford the crude *N*-Boc protected pyrrolidine derivative. A solution of H<sub>2</sub>O<sub>2</sub> (0.4 mL, 4.0 mmol, 30 wt.% in H<sub>2</sub>O, 4 equiv.) in THF (1 mL) was added to a solution of LiOH·H<sub>2</sub>O (135 mg, 3.2 mmol, 1.6 equiv.) in H<sub>2</sub>O (3 mL) at 0 °C under argon. The resulting mixture was added dropwise to a solution of crude *N*-Boc protected piperidine in THF (4 mL) at 0 °C under argon. The reaction was then stirred at 45 °C for 24 h. The reaction mixture was then allowed to cool down to room temperature and sat. aq. Na<sub>2</sub>S<sub>2</sub>O<sub>3</sub> (3 mL), EtOAc (3 mL) and 1 M NaOH (3 mL) were added. The aqueous layer was collected, and the organic layer extracted with 1 M NaOH (3 × 7 mL). The aqueous layers were combined, washed with EtOAc (20 mL), and acidified to pH 2–3 with conc. HCl. The acidic layer was extracted with EtOAc (5 × 25 mL). The combined organic extracts were washed with brine (35 mL), dried over Na<sub>2</sub>SO<sub>4</sub> and filtered. Solvent was removed under reduced pressure. Et<sub>2</sub>O (35 mL) and pentane (35 mL) were added and the solvent was removed under reduced pressure to afford the pure **A13** (548 mg, 77% over 2 steps, single diastereoisomer).

**Physical state:** White solid

**m.p.:** 185-187 °C

**<sup>1</sup>H NMR (600 MHz, CDCl<sub>3</sub>, both rotamers):** δ 7.44 – 7.36 (m, 2H), 7.34 – 7.26 (m, 3H), 7.16 (t, *J* = 8.4 Hz, 2H), 6.85 (dd, *J* = 8.8, 2.4 Hz, 2H), 5.26 – 4.99 (m, 2H), 4.57 (dd, *J* = 30.3, 8.7 Hz, 1H), 3.91 – 3.87 (m, 1H), 3.77 (s, 3H), 3.70 – 3.63 (m, 1H), 3.57 – 3.50 (m, 1H), 2.60 – 2.48 (m, 1H), 2.11 – 2.18 (m, 1H).

**<sup>13</sup>C NMR (151 MHz, CDCl<sub>3</sub>, both rotamers):** δ 175.8, 175.5, 159.1, 159.0, 155.4, 155.1, 136.6, 136.4, 129.0, 129.0, 128.6, 128.5, 128.4, 128.2, 128.0, 127.7, 114.0, 67.4, 67.3, 64.1, 63.8, 55.3, 47.5, 46.6, 46.4, 46.1, 28.7, 27.8

**HRMS (ESI<sup>+</sup>)** calc'd for C<sub>20</sub>H<sub>22</sub>NO<sub>5</sub> [M+H]<sup>+</sup> 356.1492; Found 356.1490.

**TLC:** R<sub>f</sub> = 0.21 (4% MeOH/DCM)

**[α]<sub>D</sub><sup>20</sup>** = 24.3° (c 2.0, CHCl<sub>3</sub>);



## Compound 5

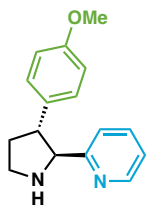

### 2-((2*S*,3*R*)-3-(4-methoxyphenyl)pyrrolidin-2-yl)pyridine (**5**).

A culture tube was charged with (2*R*,3*R*)-1-((benzyloxy)carbonyl)-3-(4-methoxyphenyl)pyrrolidine-2-carboxylic acid (89 mg, 0.25 mmol, 1.0 equiv.) and HATU (148 mg, 0.25 mmol, 1.0 equiv.). The tube was then evacuated and backfilled with argon from a balloon. DMF (2.5 mL) and Et<sub>3</sub>N (35  $\mu$ L, 0.25 mmol, 1.0 equiv.) were added. The mixture was stirred for 30 minutes. A solution of NiCl<sub>2</sub>•glyme (26 mg, 0.13 mmol, 0.5 equiv.), and di*t*BuBipy (35 mg, 0.25 mmol, 1 equiv.) in DMF (2.5 mL) was added, and the mixture was stirred for 5 minutes. A 0.42 M solution of 2-pyridine zinc reagent (1.8 mL, 0.75 mmol, 3.0 equiv.) in THF was then added. The argon balloon was removed, and the culture tube was sealed with Teflon™ tape and electrical tape. The resulting mixture was allowed to stir overnight at room temperature. The reaction mixture was quenched with 0.1 M HCl and extracted with EtOAc (2x 10 mL). The organic layer was washed with water (2x 10 mL), LiCl (1x 10 mL) and dried over MgSO<sub>4</sub>. The organic layer was concentrated *in vacuo*. The crude product was then diluted in 1 mL of EtOAc and Pd/C (10 wt%, 2.50 mg, 0.005 mmol) was added. The reaction vessel was purged three times with hydrogen, charged to 50 psi. The reaction was heated under microwave irradiation to 80 °C and held for 5 minutes. Upon cooling to room temperature, the reaction mixture was filtered through Celite®, washed with EtOAc and condensed. The crude mixture was then purified by silica gel flash column chromatography (4:96 MeOH:DCM) to yield the pure compound **5** as a colorless oil (36.8 mg, 58% over 3 steps).

**Physical state:** colorless oil

**<sup>1</sup>H NMR (600 MHz, CDCl<sub>3</sub>):** δ 8.56 (d, *J* = 4.5 Hz, 1H), 7.57 (t, *J* = 7.7 Hz, 1H), 7.28 (dd, *J* = 7,7, 4.8 Hz, 1H), 7.20 (t, *J* = 7.7 Hz, 2H), 6.89 – 6.88 (m, 2H), 6.80 (d, 7.1 Hz, 1H), 3.90 (t, *J* = 7.7 Hz, 2H), 3.80 (s, 3H), 3.57 – 3.53 (m, 1H), 3.30 – 3.26 (m, 1H), 3.54 – 3.42 (m, 2H).

**HRMS (ESI<sup>+</sup>)** calc'd for C<sub>14</sub>H<sub>19</sub>N<sub>2</sub>O [M+H]<sup>+</sup> 356.1492; Found 356.1490.

**TLC:** R<sub>f</sub> = 0.21 (4% MeOH/DCM)

[α]<sub>D</sub><sup>20</sup> = 87° (c 1.0, CHCl<sub>3</sub>);

**Chiral SFC:** IG column (3 μm, 4.6x250 mm) under isocratic conditions [3% MeOH / CO<sub>2</sub> (4 mL/min), 1600 psi backpressure] at 30 °C. The enantiomers were detected by UV light (260 nm). *t*<sub>R</sub> (major) = 5.735 min, *t*<sub>R</sub> (minor) = 6.149 min, >99 % *ee*.

*Data are in accordance with those published in the literature.*<sup>17</sup>

Racemic:

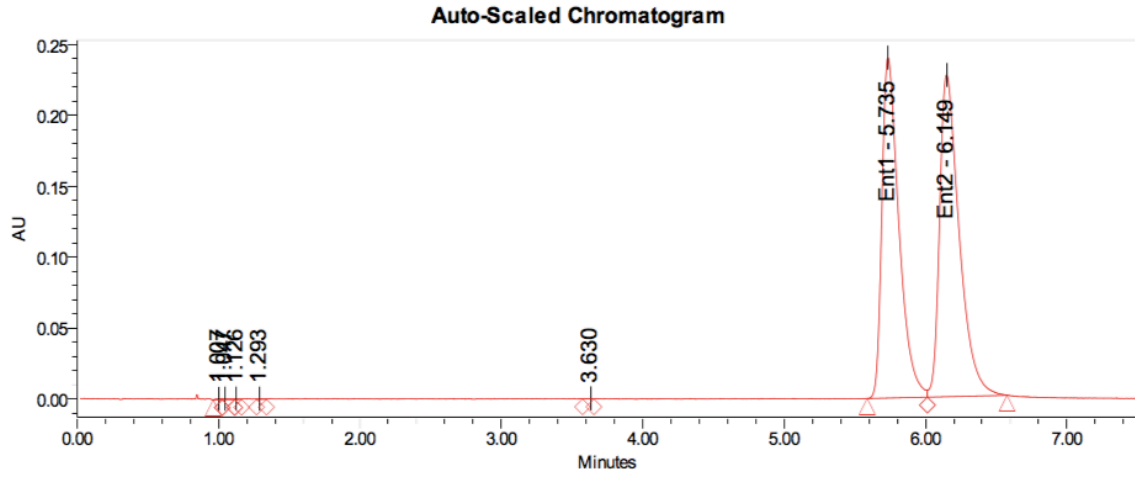

Enantioenriched 5:

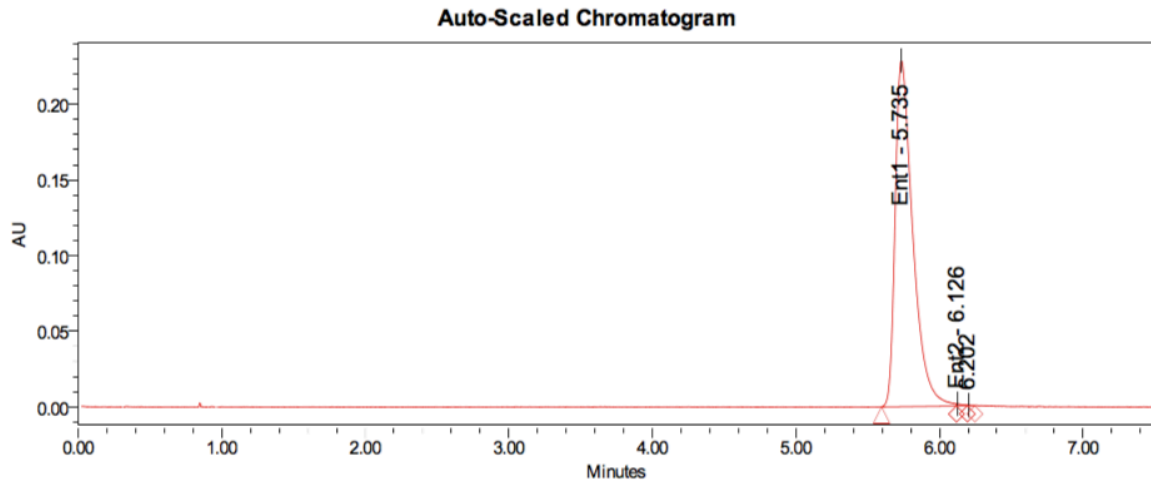

|          |       |       |       |         |         |
|----------|-------|-------|-------|---------|---------|
| KSF-JV-1 | 47.74 | 52.26 | -4.52 | 1999311 | 2188759 |
| KSF-JV-2 | 99.77 | 0.23  | 99.54 | 1953645 | 4485    |

## Unsuccessful or Challenging Substrates

### Morpholine Scaffold: C-H $sp^3$ Arylation

**Table S2: 8-Aminoquinoline as directing group: Screening of Bases and solvents using Pd(OAc)<sub>2</sub> as catalyst.**

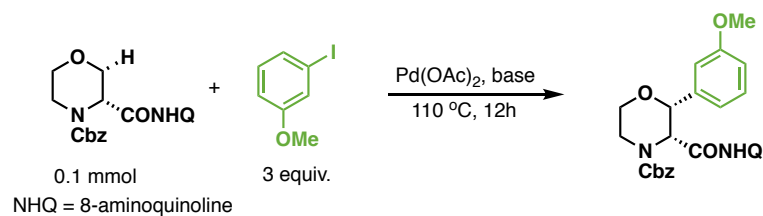

| entry           | base                            | solvent                        | yield <sup>a</sup> |
|-----------------|---------------------------------|--------------------------------|--------------------|
| 1               | K <sub>2</sub> CO <sub>3</sub>  | t-Am-OH                        | n.d.               |
| 2               | K <sub>3</sub> PO <sub>4</sub>  | t-Am-OH                        | n.d.               |
| 3               | KOAc                            | t-Am-OH                        | n.d.               |
| 4               | Cs <sub>2</sub> CO <sub>3</sub> | t-Am-OH                        | n.d.               |
| 5               | K <sub>3</sub> PO <sub>4</sub>  | t-Am-OH:H <sub>2</sub> O = 4:1 | n.d.               |
| 6               | KH <sub>2</sub> PO <sub>4</sub> | t-Am-OH                        | n.d.               |
| 7               | AgTFA                           | toluene                        | n.d.               |
| 8               | AgOTf                           | toluene                        | n.d.               |
| 9               | K <sub>2</sub> CO <sub>3</sub>  | HFIP                           | n.d.               |
| 10              | Cs <sub>2</sub> CO <sub>3</sub> | HFIP                           | n.d.               |
| 11 <sup>b</sup> | AgOAc                           | toluene <sup>c</sup>           | 15%                |
| 12 <sup>b</sup> | AgOAc                           | toluene                        | 12%                |
| 13 <sup>b</sup> | AgOAc                           | toluene <sup>d</sup>           | 10%                |
| 14 <sup>e</sup> | AgOAc                           | neat                           | 12%                |
| 15 <sup>b</sup> | Ag <sub>2</sub> CO <sub>3</sub> | toluene                        | 9%                 |
| 16 <sup>b</sup> | Ag <sub>2</sub> O               | toluene                        | 6%                 |

Conditions: Pd(OAc)<sub>2</sub> (10 mol%), base (2 equiv), solvent (1 mL).<sup>a</sup> yield determined by NMR  
<sup>b</sup> reaction carried out with 4-iodoanisole <sup>c</sup> 90 °C <sup>d</sup> 130 °C <sup>e</sup> 4-iodoanisole (10 equiv).

**Table S3: Boc as protecting group: Screening of Bases and solvents using Pd(OAc)<sub>2</sub> as catalyst.**

Morpholine 3-amide:

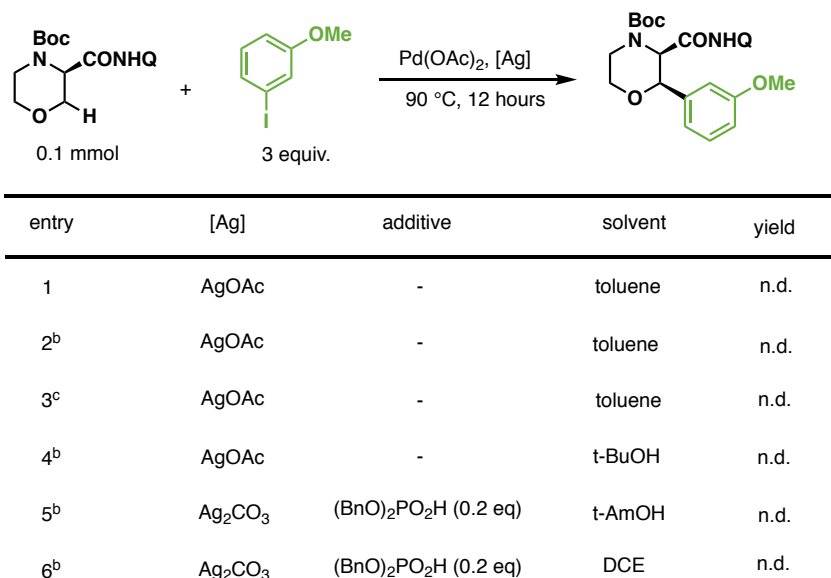

Conditions: Pd(OAc)<sub>2</sub> (10 mol%), [Ag] (2 equiv), toluene (0.5 mL).<sup>a</sup> yield determined by NMR  
<sup>b</sup> 110 °C. <sup>c</sup> Pd(OAc)<sub>2</sub> (50 mol%), (BnO)PO<sub>2</sub>H (20 mol%) as additive, Ar.

Morpholine 2-amide:

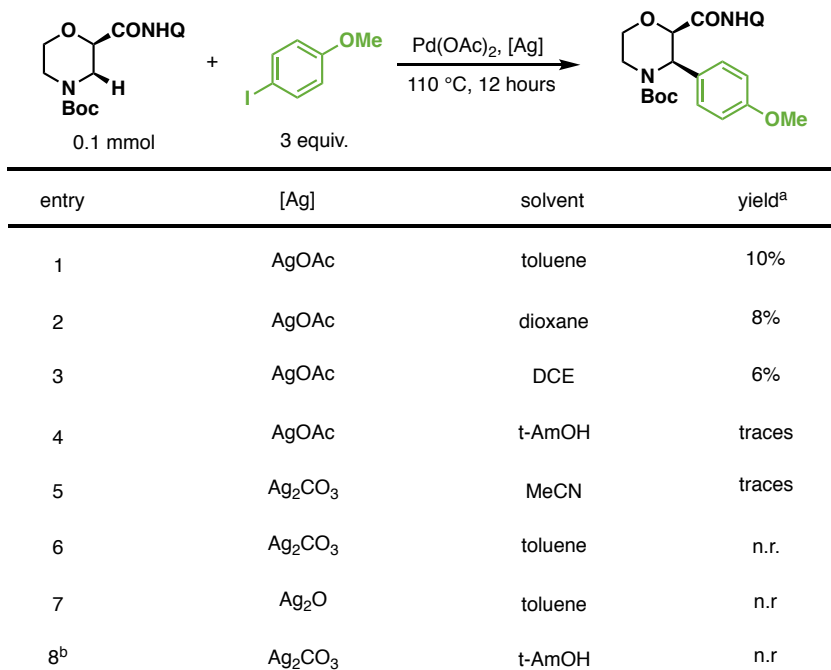

Conditions: Pd(OAc)<sub>2</sub> (10 mol%), [Ag] (2 equiv), solvent (1 mL).<sup>a</sup> yield determined by NMR  
<sup>b</sup> (BnO)PO<sub>2</sub>H (20 mol%) as additive, Ar.

**Table S4: *PIP* as directing group: Screening of Bases and solvents using Pd(OAc)<sub>2</sub> as catalyst.**

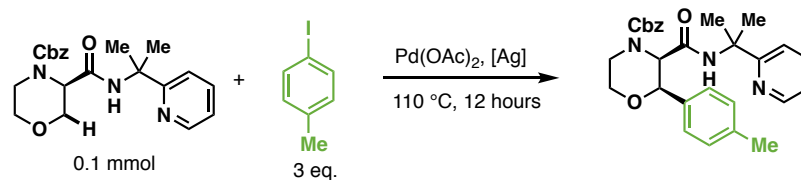

| entry          | [Ag]                            | additive                                      | solvent    | yield <sup>a</sup> |
|----------------|---------------------------------|-----------------------------------------------|------------|--------------------|
| 1              | AgOAc                           | —                                             | toluene    | n.d.               |
| 2              | AgOAc                           | —                                             | t-BuOH     | n.d.               |
| 3              | AgOAc                           | PivOH (0.5 eq)                                | toluene    | n.d.               |
| 4              | Ag <sub>2</sub> CO <sub>3</sub> | (BnO) <sub>2</sub> PO <sub>2</sub> H (0.2 eq) | t-AmOH     | n.d.               |
| 5 <sup>b</sup> | AgOAc                           | —                                             | toluene    | n.d.               |
| 6              | Ag <sub>2</sub> CO <sub>3</sub> | (BnO) <sub>2</sub> PO <sub>2</sub> H (0.2 eq) | DCE:t-BuOH | n.d.               |

Conditions: Pd(OAc)<sub>2</sub> (10 mol%), [Ag] (1.8 equiv), solvent (1 mL).<sup>a</sup> yield determined by NMR <sup>b</sup> 130 °C

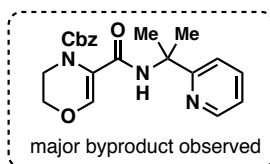

## Morpholine Scaffold: C-H $sp^3$ Methylation and Alkynylation

### Table S5: Screening of conditions for C-H $sp^3$ Methylation

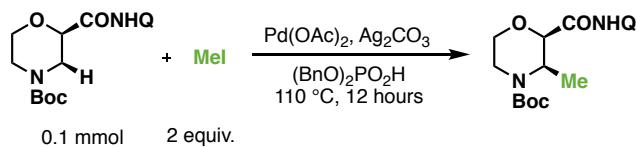

| entry          | solvent   | yield <sup>a</sup> |
|----------------|-----------|--------------------|
| 1              | t-amyl-OH | traces             |
| 2 <sup>b</sup> | t-amyl-OH | traces             |
| 3              | toluene   | nd                 |

Conditions: Pd(OAc)<sub>2</sub> (10 mol%), (BnO)<sub>2</sub>PO<sub>2</sub>H (20 mol%), Ag<sub>2</sub>CO<sub>3</sub> (2 equiv.), solvent (0.5 mL).<sup>a</sup> yield determined by LC-MS. <sup>b</sup> without (BnO)<sub>2</sub>PO<sub>2</sub>H.

### Table S6: Screening of conditions for C-H $sp^3$ Alkynylation

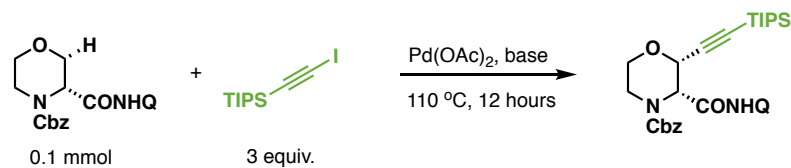

| entry          | base                                   | solvent | yield <sup>a</sup> |
|----------------|----------------------------------------|---------|--------------------|
| 1              | AgOAc                                  | toluene | n.d.               |
| 2              | Ag <sub>2</sub> CO <sub>3</sub>        | toluene | n.d.               |
| 3              | AgTFA                                  | toluene | n.d.               |
| 4 <sup>b</sup> | AgOAc                                  | HFIP    | n.d.               |
| 5              | AgOAc                                  | DCE     | n.d.               |
| 6              | AgOAc                                  | dioxane | n.d.               |
| 7              | AgOAc                                  | MeCN    | n.d.               |
| 8              | AgOAc + K <sub>2</sub> CO <sub>3</sub> | toluene | n.d.               |
| 9              | AgOAc + CsF                            | toluene | n.d.               |

Conditions: Pd(OAc)<sub>2</sub> (10 mol%), base (2 equiv.), solvent (1 mL). <sup>a</sup> yield determined by NMR <sup>b</sup> byproduct observed.

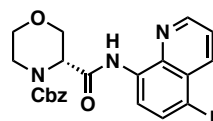

## Piperazine Scaffold: C-H sp<sup>3</sup>alkoxylation and arylation

Table S7: Screening of conditions for C-H sp<sup>3</sup> Alkoxylation

| entry          | Pd(OAc) <sub>2</sub> (mol%) | DMP (eq) | additive                     | yield <sup>a</sup> |
|----------------|-----------------------------|----------|------------------------------|--------------------|
| 1              | 30                          | 4        | —                            | 15%                |
| 2              | 50                          | 4        | —                            | 23%                |
| 3 <sup>b</sup> | 20                          | 4        | —                            | <5%                |
| 4              | 20                          | 4        | —                            | <5%                |
| 5              | 20                          | 4        | PhI(OAc) <sub>2</sub> (1 eq) | <5%                |
| 6              | 20                          | 4        | HOAc (1 eq)                  | 10%                |
| 7              | 20                          | —        |                              | 11%                |

Conditions: <sup>a</sup> yield determined by NMR. <sup>b</sup> 70 °C.



**Table S8: 8-Aminoquinoline as directing group: Screening of conditions for arylation.**

| entry             | PhI (eq) | [Pd]                 | [Ag]                            | solvent | temperature | additive | yield <sup>a</sup> |
|-------------------|----------|----------------------|---------------------------------|---------|-------------|----------|--------------------|
| 1                 | 3        | Pd(OAc) <sub>2</sub> | AgOAc                           | Toluene | 110 °C      | —        | nd                 |
| 2                 | 3        | Pd(TFA) <sub>2</sub> | AgOAc                           | Toluene | 110 °C      | —        | nd                 |
| 3                 | 10       | Pd(OAc) <sub>2</sub> | Ag <sub>2</sub> CO <sub>3</sub> | neat    | 110 °C      | PivOH    | nd                 |
| 4                 | 3        | Pd(OAc) <sub>2</sub> | Ag <sub>2</sub> CO <sub>3</sub> | Toluene | 110 °C      | —        | nd                 |
| 5                 | 3        | Pd(OAc) <sub>2</sub> | AgOAc                           | Toluene | 110 °C      | PivOH    | nd                 |
| 6                 | 10       | Pd(OAc) <sub>2</sub> | AgOAc                           | neat    | 110 °C      | —        | nd                 |
| 7                 | 3        | Pd(OAc) <sub>2</sub> | AgBF <sub>4</sub>               | t-BuOH  | 75 °C       | —        | traces             |
| 8                 | 20       | Pd(OAc) <sub>2</sub> | AgOAc                           | Toluene | 110 °C      | —        | nd                 |
| 9 <sup>b</sup>    | 3        | Pd(OAc) <sub>2</sub> | AgOAc                           | Toluene | 90 °C       | —        | nd                 |
| 10 <sup>b</sup>   | 3        | Pd(OAc) <sub>2</sub> | AgOAc                           | neat    | 110 °C      | —        | nd                 |
| 11 <sup>b,c</sup> | 3        | Pd(OAc) <sub>2</sub> | AgOAc                           | Toluene | 125 °C      | —        | nd                 |

Conditions: Pd(OAc)<sub>2</sub> (10 mol%), [Ag] (2 equiv.), additive (0.2 equiv.), solvent (0.5 mL).<sup>a</sup> yield determined by LC-MS. <sup>b</sup> reaction carried out with 4-iodoanisole. <sup>c</sup> reaction carried out using a microwave reactor for 20 minutes.

**Table S9: 2-thiomethylaniline as directing group: Screening of conditions for arylation.**

| entry | PhI (eq) | [Ag]                            | solvent | temperature | additive | yield  |
|-------|----------|---------------------------------|---------|-------------|----------|--------|
| 1     | 3        | AgOAc                           | toluene | 110 °C      | —        | traces |
| 2     | 10       | Ag <sub>2</sub> CO <sub>3</sub> | —       | 110 °C      | PivOH    | nd     |
| 3     | 3        | Ag <sub>2</sub> CO <sub>3</sub> | t-BuOH  | 75 °C       | —        | nd     |
| 4     | 3        | AgBF <sub>4</sub>               | t-BuOH  | 75 °C       | —        | nd     |

Conditions: Pd(OAc)<sub>2</sub> (10 mol%), [Ag] (2 equiv.), additive (0.2 equiv.), solvent (0.5 mL).  
<sup>a</sup> yield determined by LC-MS

# Experimental Procedures and Characterization Data for BRD8468 (74)

## (Figure 5-a)

### Synthetic route to compound BRD8468 (74)

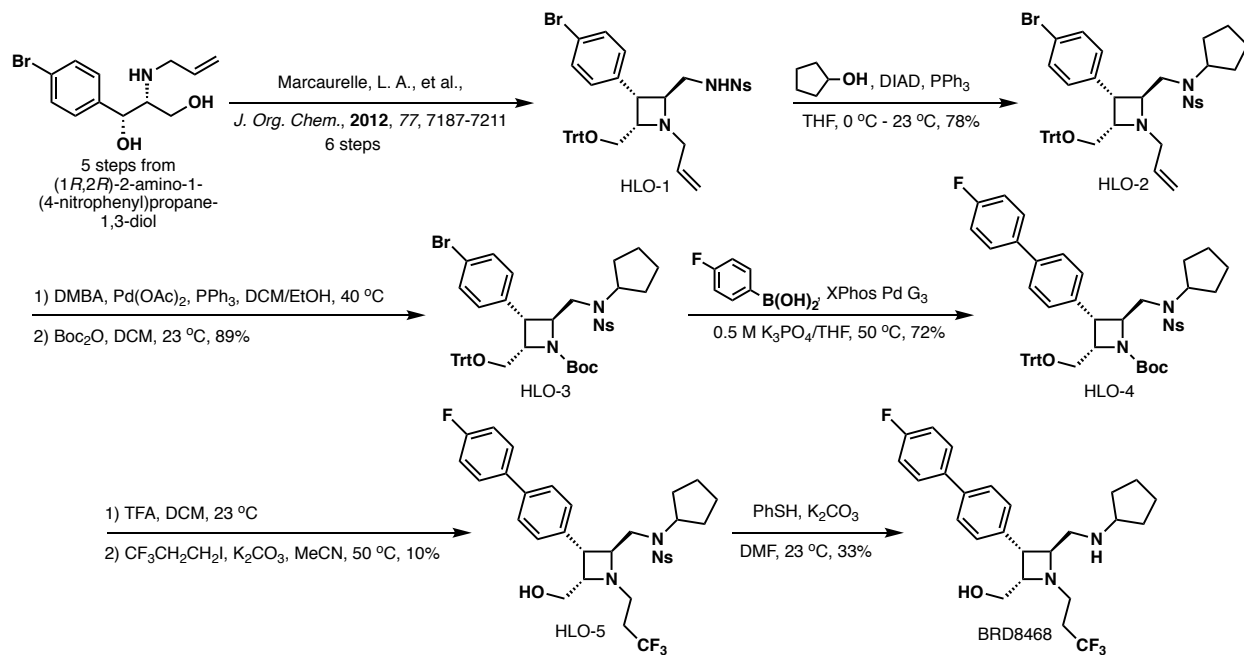

## Compound BRD8468

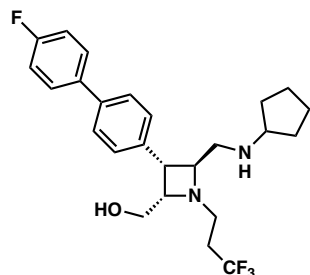

**((2*S*,3*R*,4*S*)-4-((cyclopentylamino)methyl)-3-(4'-fluoro-[1,1'-biphenyl]-4-yl)-1-(3,3,3-trifluoropropyl)azetidin-2-yl)methanol (72)**

**Physical State:** colorless oil

**<sup>1</sup>H NMR (600 MHz, CDCl<sub>3</sub>):** δ 7.54 – 7.49 (m, 4H), 7.32 (d, *J* = 7.9 Hz, 2H), 7.12 (t, *J* = 8.6 Hz, 2H), 4.10 (s, 1H), 3.99 (s, 1H), 3.78 (s, 1H), 3.65 (d, *J* = 3.6 Hz, 1H), 3.54 (dd, *J* = 12.1, 3.9 Hz, 1H), 3.21 (s, 1H), 2.88 (dd, *J* = 12.5, 4.9 Hz, 1H), 2.82 – 2.76 (m, 1H), 2.40 – 2.36 (m, 1H), 2.34 (t, *J* = 7.5 Hz, 3H), 1.92 (d, *J* = 23.4 Hz, 1H) ppm.

**<sup>13</sup>C NMR (151 MHz, CDCl<sub>3</sub>):** δ 128.1, 128.1, 127.6, 127.5, 127.1, 126.8, 126.3, 115.3, 115.1, 70.1, 65.2, 37.0, 36.7, 35.5, 34.0, 33.3, 31.5, 31.4, 27.0, 26.3, 25.1, 22.7, 22.2, 13.7 ppm.

**<sup>19</sup>F NMR (376 MHz, CDCl<sub>3</sub>):** δ -65.10, -115.86 ppm.

**LRMS-ESI:** (*m/z*) 451.6 [M+H]<sup>+</sup>

**HRMS (ESI-TOF):** calc'd for C<sub>25</sub>H<sub>31</sub>F<sub>4</sub>N<sub>2</sub>O [M+H]<sup>+</sup>: 451.2373, found: 451.2373.

**TLC:** R<sub>f</sub> = 0.47 (9:1 CH<sub>2</sub>Cl<sub>2</sub>:MeOH).

**Note:** An LCMS of BRD8468 provided by the Broad Institute was run alongside a LCMS of the synthesized BRD8468 (74) as well as a mixture of both provided/synthesized BRD8468

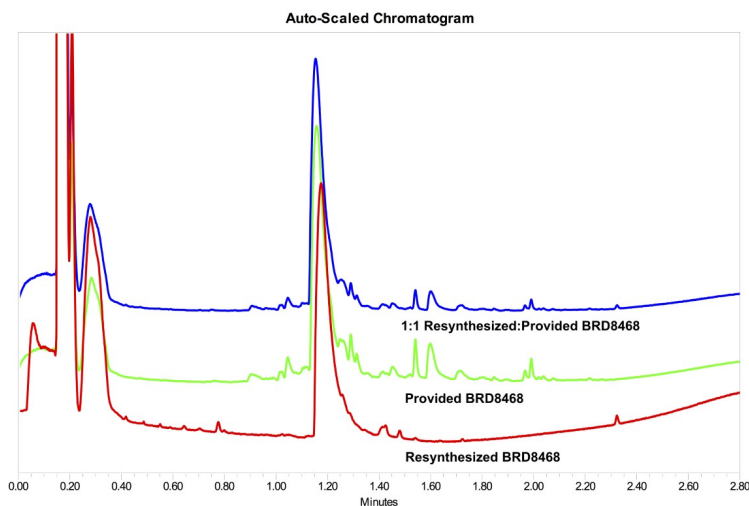

## Experimental Procedures and Characterization Data for the synthesis of BRD8468 analogs (Figure 5-b)

### Compound SI- 44<sup>16</sup>

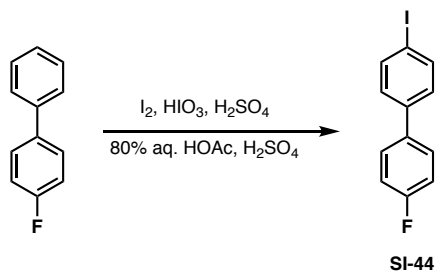

#### 4-fluoro-4'-iodo-1,1'-biphenyl (SI-44)

A round-bottom flask equipped with a condenser and a stir bar was charged with 4-fluoro-1,1'-biphenyl (17.5 g, 172 mmol, 1 equiv.) and 80% aqueous HOAc (246 mL), concentrated H<sub>2</sub>SO<sub>4</sub> (2.19 mL), I<sub>2</sub> (17.1 g, 20.3 mmol, 0.7 equiv.), HIO<sub>3</sub> (4.66 g, 26.4 mmol, 0.26 equiv.) were added to the flask. The suspension was heated at 80 °C until full conversion of starting material, followed by GC-MS (typical time was 8 hours). Then, the reaction mixture was cooled to room temperature and diluted with a sat. aq. NaHSO<sub>3</sub> solution. Additional solid NaHSO<sub>3</sub> was added, and the suspension was stirred for 3 hours to remove solid I<sub>2</sub>. The solid was filtered, washed with water, and dried in vacuo to afford the desired product as a white solid. The solid was then recrystallized in EtOH affording 29.2 g (97%) of the title compound **SI-44**.

**Physical State:** white crystalline solid.

**m.p.:** 88-89 °C.

**<sup>1</sup>H NMR (600 MHz, CDCl<sub>3</sub>):** δ 7.76 (d, *J* = 8.5 Hz, 2H), 7.53 – 7.48 (m, 2H), 7.29 – 7.26 (m, 2H), 7.13 (t, *J* = 8.7 Hz, 2H) ppm.

**<sup>19</sup>F NMR (376 MHz, CDCl<sub>3</sub>):** δ -115.17 ppm.

**<sup>13</sup>C NMR (151 MHz, CDCl<sub>3</sub>):** δ 162.8 (d, *J*<sub>C-F</sub> = 247.1 Hz), 139.9, 138.0, 136.3 (d, *J*<sub>C-F</sub> = 3.3 Hz), 129.0, 128.6 (d, *J*<sub>C-F</sub> = 8.0 Hz), 115.9 (d, *J*<sub>C-F</sub> = 21.5 Hz), 93.1 ppm.

**TLC:** R<sub>f</sub> = 0.5 (9: 1 Hexanes:Ether).

*Note: no HRMS could be recorded for SI-44*

## Compound 74

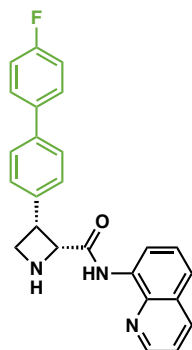

### (2*R*,3*S*)-3-(4'-fluoro-[1,1'-biphenyl]-4-yl)-*N*-(quinolin-8-yl)azetidine-2-carboxamide (74)

Following General Procedure A2.2 on 10.5 mmol scale. Purification by flash column chromatography (silica, 6:4 Hexanes:EtOAc) afforded 3.28 g (79 %) of the title compound 74.

**Physical State:** white solid.

**m.p.:** 185-187 °C.

**<sup>1</sup>H NMR (600 MHz, CDCl<sub>3</sub>):** δ 11.33 (s, 1H), 8.93 (d, *J* = 4.9 Hz, 1H), 8.48 (d, *J* = 7.6 Hz, 1H), 8.12 (d, *J* = 8.2 Hz, 1H), 7.55 (d, *J* = 8.1 Hz, 2H), 7.47 – 7.36 (m, 3H), 7.32 – 7.23 (m, 4H), 6.99 (t, *J* = 8.7 Hz, 2H), 4.99 (d, *J* = 9.4 Hz, 1H), 4.42 – 4.20 (m, 2H), 3.79 (dd, *J* = 7.9, 4.2 Hz, 1H) ppm.

**<sup>19</sup>F NMR (376 MHz, CDCl<sub>3</sub>):** δ -116.45 ppm.

**<sup>13</sup>C NMR (151 MHz, CDCl<sub>3</sub>):** δ 169.9, 162.3 (d, *J*<sub>C-F</sub> = 246.0 Hz), 148.7, 139.1, 138.8, 138.2, 137.0 (d, *J*<sub>C-F</sub> = 3.2 Hz), 136.2, 133.8, 128.6 - 128.5 (m), 128.1, 127.3, 126.9, 121.7 (d, *J*<sub>C-F</sub> = 43.1 Hz), 116.6, 115.4 (d, *J*<sub>C-F</sub> = 21.4 Hz), 65.0, 50.1, 43.1 ppm.

**HRMS (ESI-TOF):** calc'd for C<sub>25</sub>H<sub>21</sub>FN<sub>3</sub>O [M+H]<sup>+</sup>: 398.1669, found: 398.1668.

**TLC:** R<sub>f</sub> = 0.16 (16:1 Ether:MeOH).

## Compound SI-45

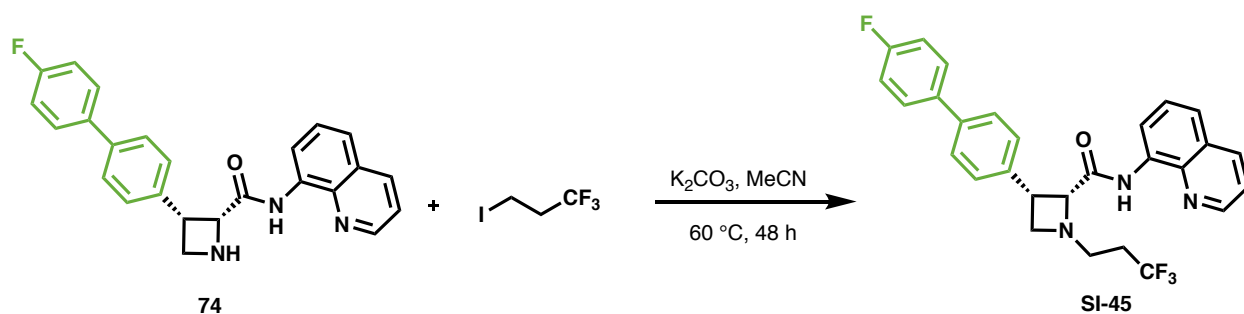

### (2R,3S)-3-(4'-fluoro-[1,1'-biphenyl]-4-yl)-N-(quinolin-8-yl)-1-(3,3,3-trifluoropropyl)azetidine-2-carboxamide (SI-45)

A reaction vessel was charged with (2R,3S)-3-(4'-fluoro-[1,1'-biphenyl]-4-yl)-N-(quinolin-8-yl)azetidine-2-carboxamide (**74**), (4.29 g, 10.8 mmol, 1 equiv.) and K<sub>2</sub>CO<sub>3</sub> (5.96 g, 43.2 mmol, 4 equiv.). The reaction vessel was evacuated and backfilled with argon from a balloon (3x). Acetonitrile was added (21.6 mL, 0.5 M), followed by addition of 1,1,1-Trifluoro-3-iodopropane (5.10 mL, 43.2 mmol, 4 equiv.) and the vessel was placed in an oil bath (preheated to 60 °C) for 12 hours. The reaction mixture was then allowed to cool to room temperature and more 1,1,1-Trifluoro-3-iodopropane (1 mL, 8.56 mmol, 1 equiv.) and acetonitrile (6 mL) were added to the mixture. The reaction vessel was replaced in oil bath for further 12 hours. Then, after 48 hours the reaction vessel was allowed to cool to room temperature and the reaction mixture was quenched with water and extracted with EtOAc (3x). The combined organic layers were dried over Na<sub>2</sub>SO<sub>4</sub>, filtered and concentrated *in vacuo*. The crude mixture was purified by flash column chromatographic (silica, 3:7 Hexanes:Ether) to afford 2.39 g (48 %) of the title compound **SI-45**.

**Physical State:** yellow oil.

**<sup>1</sup>H NMR (600 MHz, CDCl<sub>3</sub>):** δ 11.38 (bs, 1H), 9.00 (bs, 1H), 8.57 (bs, 1H), 8.12 (bs, 1H), 7.68 (bs, 2H), 7.55 – 7.22 (m, 7H), 7.03 (bs, 2H), 4.37 (bs, 1H), 4.16 (bs, 1H), 3.98 (bs, 1H), 3.67 (bs, 1H), 3.19 (bs, 1H), 3.04 (bs, 1H), 2.65 (bs, 2H) ppm.

**<sup>19</sup>F NMR (376 MHz, CDCl<sub>3</sub>):** δ -65.28, -116.29 ppm.

**<sup>13</sup>C NMR (151 MHz, CDCl<sub>3</sub>):** δ 168.2, 162.2 (d, *J*<sub>C-F</sub> = 246.0 Hz), 148.5, 138.8 (d, *J*<sub>C-F</sub> = 33.2 Hz), 137.4, 136.7 (d, *J*<sub>C-F</sub> = 2.5 Hz), 136.0, 133.5, 128.6, 128.3 (d, *J*<sub>C-F</sub> = 8.0 Hz), 127.9, 127.0, 126.7, 121.7 (d, *J*<sub>C-F</sub> = 43.2 Hz), 116.3, 115.3 (d, *J*<sub>C-F</sub> = 246.0 Hz), 71.9, 56.5, 50.7, 38.8, 33.0 (q, *J*<sub>C-F</sub> = 28.3 Hz) ppm.

**HRMS (ESI-TOF):** calc'd for C<sub>28</sub>H<sub>24</sub>F<sub>4</sub>N<sub>3</sub>O [M+H]<sup>+</sup>: 494.1856, found: 494.1859.

**TLC:**  $R_f = 0.43$  (3:7 Hexanes:Ether).

$[\alpha]_D^{20} = -141.30$  ( $c = 1.0$ ,  $\text{CHCl}_3$ ).

## Compound A15

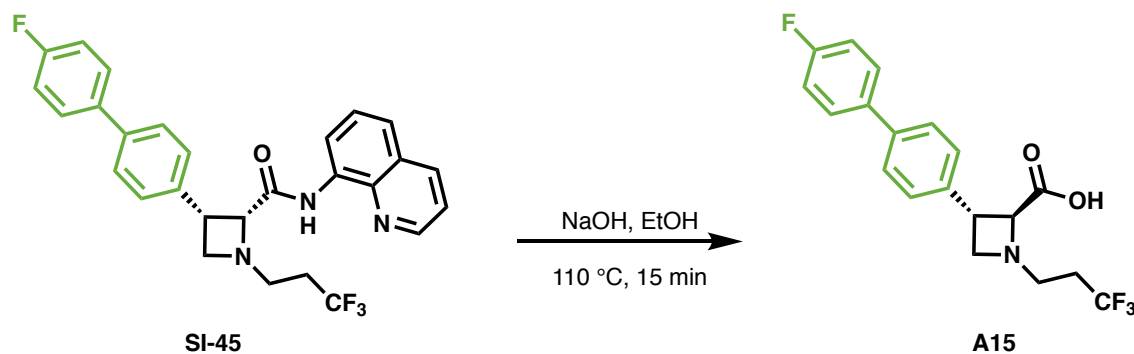

### (2*S*,3*S*)-3-(4'-fluoro-[1,1'-biphenyl]-4-yl)-1-(3,3,3-trifluoropropyl)azetidine-2-carboxylic acid (**A15**)

A sealed tube equipped with a stir bar was charged with (2*R*,3*S*)-3-(4'-fluoro-[1,1'-biphenyl]-4-yl)-*N*-(quinolin-8-yl)-1-(3,3,3 trifluoropropyl) azetidine-2-carboxamide **SI-45** (1 g, 2.03 mmol, 1 equiv.), followed by the addition of EtOH (10.1 mL, 0.2 M). To the mixture NaOH pellets (0.81 g, 20.3 mmol, 10 equiv.) were added. The tube was sealed and placed in an oil bath (preheated to 110°C) for 15 min (*note: reaction time is critical*). The reaction mixture was then allowed to cool to room temperature and water was added and the crude mixture was washed with DCM (2x). The resulting aqueous solution was acidified with 1 M HCl, exhaustively extracted with 3:7 *i*-PrOH:CHCl<sub>3</sub> (5x) and dried over Na<sub>2</sub>SO<sub>4</sub>. Concentration *in vacuo* afforded 0.67 g (90 %) of the title compound **A15**.

**Physical State:** brown solid.

**m.p.:** 185-186 °C.

**<sup>1</sup>H NMR (400 MHz, MeOD):** δ 7.68 – 7.62 (m, 4H), 7.56 (d, *J* = 8.3 Hz, 2H), 7.19 (t, *J* = 8.8 Hz, 2H), 4.86 (d, *J* = 9.2 Hz, 1H), 4.37 (t, *J* = 8.6 Hz, 1H), 4.14 (q, *J* = 9.2 Hz, 1H), 4.04 (t, *J* = 9.4 Hz, 1H), 3.66 – 3.44 (m, 2H), 2.83 – 2.63 (m, 2H) ppm.

**<sup>19</sup>F NMR (376 MHz, MeOD):** δ -67.22, -117.94 ppm.

**<sup>13</sup>C NMR (151 MHz, MeOD):** δ 172.1, 164.0 (d, *J*<sub>C-F</sub> = 245.0 Hz), 140.9, 138.3, 138.1 (d, *J*<sub>C-F</sub> = 3.2 Hz), 129.7 (d, *J*<sub>C-F</sub> = 8.01 Hz), 128.9, 128.3, 116.6 (d, *J*<sub>C-F</sub> = 21.8 Hz), 74.9, 57.5, 40.9, 31.1 (q, *J*<sub>C-F</sub> = 30.3 Hz) ppm.

**HRMS (ESI-TOF):** calc'd for C<sub>19</sub>H<sub>18</sub>F<sub>4</sub>NO<sub>2</sub> [M+H]<sup>+</sup>: 368.1274, found: 368.1274.

**TLC:** R<sub>f</sub> = 0.17 (9:1 CH<sub>2</sub>Cl<sub>2</sub>:MeOH).

[α]<sub>D</sub><sup>20</sup> = 71.4 (*c* = 0.5, MeOH).



## Compound A16

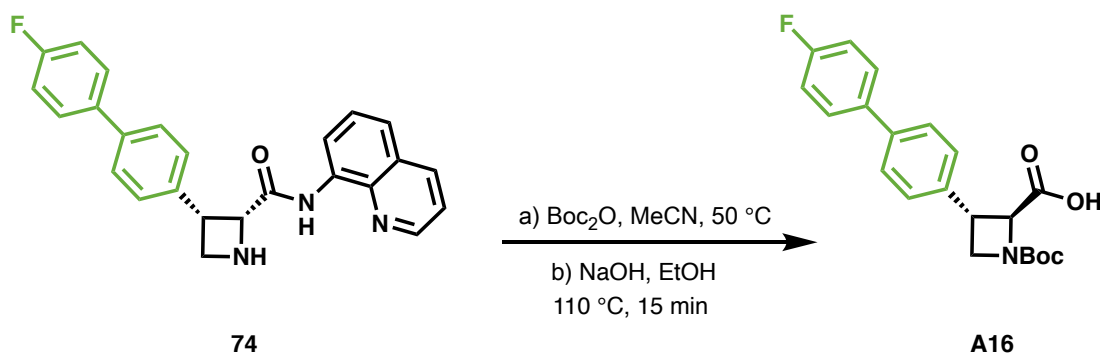

### (2*S*,3*S*)-1-(*tert*-butoxycarbonyl)-3-(4'-fluoro-[1,1'-biphenyl]-4-yl)azetidine-2-carboxylic acid (A16)

A round bottom flask equipped with a stir bar was charged with (2*R*,3*S*)-3-(4'-fluoro-[1,1'-biphenyl]-4-yl)-*N*-(quinolin-8-yl)azetidine-2-carboxamide (**74**) (1.25 g, 3.14 mmol, 1 equiv.) and dissolved in MeCN (7.4 mL, 0.5 M). Boc<sub>2</sub>O (0.93 mL, 3.46 mmol, 1.1 equiv.) was added and the reaction mixture was heated to 50 °C and stirred for 15 minutes. The solvent was removed *in vacuo* and the residue was dissolved in EtOH (15.7 mL, 0.2 M) and transferred to a sealed tube. To the mixture NaOH pellets (1.26 g, 31.4 mmol, 10 equiv.) were added. The tube was sealed and placed in an oil bath (preheated to 110 °C) for 15 min (*note: reaction time is critical*). The reaction mixture was then allowed to cool to room temperature and water was added and the crude mixture was washed with DCM (2x). The resulting aqueous solution was acidified with 1 M HCl, exhaustively extracted with 3:7 *i*-PrOH:CHCl<sub>3</sub> (5x) and dried over Na<sub>2</sub>SO<sub>4</sub>. Concentration *in vacuo* afforded 716 mg (62 %) of the title compound **A16**.

**Physical State:** brown solid.

**m.p.:** 82-83 °C.

**<sup>1</sup>H NMR (600 MHz, CDCl<sub>3</sub>):** δ 7.53 – 7.45 (m, 4H), 7.36 (d, *J* = 8.0 Hz, 2H), 7.11 (t, *J* = 8.5 Hz, 2H), 5.14 – 4.98 (m, 1H), 4.35 – 3.97 (m, 3H), 1.47 (s, 9H) ppm.

**<sup>19</sup>F NMR (376 MHz, DMSO):** δ -115.70 ppm.

**<sup>13</sup>C NMR (151 MHz, DMSO):** δ 171.6, 162.7, 161.1, 138.2, 136.2 (d, *J*<sub>C-F</sub> = 3.0 Hz), 128.6 (d, *J*<sub>C-F</sub> = 8.2 Hz), 127.6, 127.0, 115.8 (d, *J*<sub>C-F</sub> = 21.3 Hz), 79.3, 72.5, 37.5, 28.0 ppm.

**TLC:** *R*<sub>f</sub> = 0.17 (CH<sub>2</sub>Cl<sub>2</sub>:MeOH).

**[α]<sub>D</sub><sup>20</sup>** = 43.30 (*c* = 0.25, CHCl<sub>3</sub>).

*Note: no HRMS could be recorded for A17.*

## Compound B9

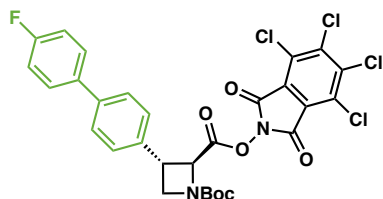

### 1-(*tert*-butyl) 2-(4,5,6,7-tetrachloro-1,3-dioxoisindolin-2-yl) (2*S*,3*S*)-3-(4'-fluoro-[1,1'-biphenyl]-4-yl)azetidine-1,2-dicarboxylate (**B9**)

Following General Procedure **B** on 1 mmol scale with **A16**. Purification by flash column chromatography (silica, DCM), afforded 224 mg (34%) of the title compound **B9**.

**Physical State:** yellow solid.

**m.p.:** 98-100 °C.

**<sup>1</sup>H NMR (600 MHz, CDCl<sub>3</sub>):** δ 7.60 – 7.45 (m, 6H), 7.14 (t, *J* = 8.7 Hz, 2H), 4.94 (d, *J* = 5.5 Hz, 1H), 4.49 (t, *J* = 8.4 Hz, 1H), 4.18 (dd, *J* = 8.1, 5.9 Hz, 1H), 4.04 (dt, *J* = 8.6, 5.7 Hz, 1H), 1.50 (bs, 9H) ppm.

**<sup>19</sup>F NMR (376 MHz, DMSO):** δ -115.61 ppm.

**<sup>13</sup>C NMR (151 MHz, CDCl<sub>3</sub>):** δ 166.8, 162.7 (dd, *J*<sub>C-F</sub> = 246.6, 7.6 Hz), 159.6, 141.4, 140.4, 140.2, 139.7, 137.8, 136.7 (dd, *J*<sub>C-F</sub> = 9.9, 3.2 Hz), 130.7, 129.9, 128.8 – 128.7 (m), 127.7 (d, *J*<sub>C-F</sub> = 28.7 Hz), 127.5 (d, *J*<sub>C-F</sub> = 7.1 Hz), 125.1, 124.8, 115.9 (dd, *J*<sub>C-F</sub> = 21.4, 5.6 Hz), 81.9, 68.0, 53.4, 42.9, 39.2, 28.4, 28.3, 23.4 ppm.

**HRMS (ESI-TOF):** calc'd for C<sub>24</sub>H<sub>14</sub>Cl<sub>4</sub>FN<sub>2</sub>O<sub>4</sub>[M-Boc+H]<sup>+</sup>: 552.9692, found: 552.9698

**TLC:** R<sub>f</sub> = 0.23 (CH<sub>2</sub>Cl<sub>2</sub>).

**[α]<sub>D</sub><sup>20</sup>** = 113.0 (*c* = 0.1, CHCl<sub>3</sub>).

## X-Ray Crystallographic Data Compound B9

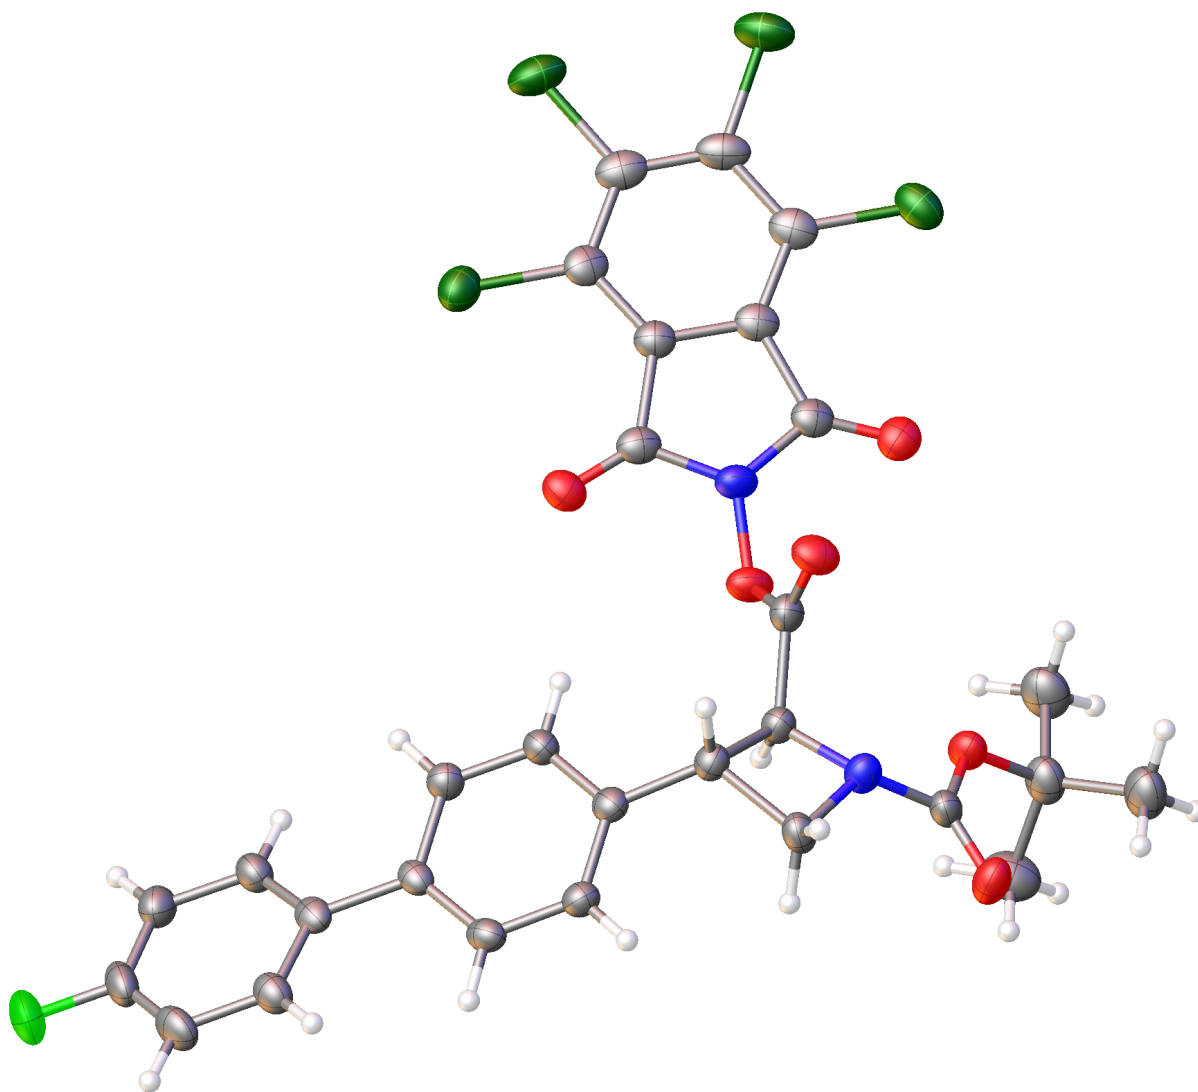

**Table S10. Crystal data and structure refinement for Baran705.**

|                                   |                                                                                 |          |
|-----------------------------------|---------------------------------------------------------------------------------|----------|
| Report date                       | 2018-11-09                                                                      |          |
| Identification code               | baran705                                                                        |          |
| Empirical formula                 | C <sub>29</sub> H <sub>21</sub> Cl <sub>4</sub> F N <sub>2</sub> O <sub>6</sub> |          |
| Molecular formula                 | C <sub>29</sub> H <sub>21</sub> Cl <sub>4</sub> F N <sub>2</sub> O <sub>6</sub> |          |
| Formula weight                    | 654.28                                                                          |          |
| Temperature                       | 100.0 K                                                                         |          |
| Wavelength                        | 1.54178 Å                                                                       |          |
| Crystal system                    | Orthorhombic                                                                    |          |
| Space group                       | P2 <sub>1</sub> 2 <sub>1</sub> 2 <sub>1</sub>                                   |          |
| Unit cell dimensions              | a = 7.0574(2) Å                                                                 | α = 90°. |
|                                   | b = 13.5533(3) Å                                                                | β = 90°. |
|                                   | c = 30.2887(7) Å                                                                | γ = 90°. |
| Volume                            | 2897.15(12) Å <sup>3</sup>                                                      |          |
| Z                                 | 4                                                                               |          |
| Density (calculated)              | 1.500 Mg/m <sup>3</sup>                                                         |          |
| Absorption coefficient            | 4.176 mm <sup>-1</sup>                                                          |          |
| F(000)                            | 1336                                                                            |          |
| Crystal size                      | 0.2 x 0.03 x 0.03 mm <sup>3</sup>                                               |          |
| Crystal color, habit              | colorless needle                                                                |          |
| Theta range for data collection   | 2.918 to 68.236°.                                                               |          |
| Index ranges                      | -8 ≤ h ≤ 8, -16 ≤ k ≤ 16, -33 ≤ l ≤ 36                                          |          |
| Reflections collected             | 32224                                                                           |          |
| Independent reflections           | 5325 [R(int) = 0.0753]                                                          |          |
| Completeness to theta = 67.679°   | 100.0 %                                                                         |          |
| Absorption correction             | Semi-empirical from equivalents                                                 |          |
| Max. and min. transmission        | 0.7533 and 0.5927                                                               |          |
| Refinement method                 | Full-matrix least-squares on F <sup>2</sup>                                     |          |
| Data / restraints / parameters    | 5325 / 0 / 382                                                                  |          |
| Goodness-of-fit on F <sup>2</sup> | 1.055                                                                           |          |
| Final R indices [I > 2σ(I)]       | R1 = 0.0423, wR2 = 0.1033                                                       |          |
| R indices (all data)              | R1 = 0.0507, wR2 = 0.1076                                                       |          |
| Absolute structure parameter      | 0.005(10)                                                                       |          |
| Largest diff. peak and hole       | 0.297 and -0.346 e.Å <sup>-3</sup>                                              |          |

**Table S11. Atomic coordinates ( $\times 10^4$ ) and equivalent isotropic displacement parameters ( $\text{\AA}^2 \times 10^3$ )**

for Baran705.  $U(\text{eq})$  is defined as one third of the trace of the orthogonalized  $U^{ij}$  tensor.

|       | x       | y        | z       | $U(\text{eq})$ |
|-------|---------|----------|---------|----------------|
| Cl(1) | 3981(2) | 10745(1) | 5693(1) | 41(1)          |
| Cl(2) | 3472(2) | 11665(1) | 6626(1) | 50(1)          |
| Cl(3) | 3837(2) | 10368(1) | 7464(1) | 49(1)          |
| Cl(4) | 4991(2) | 8138(1)  | 7382(1) | 40(1)          |
| F(1)  | 6355(6) | 8988(2)  | 2046(1) | 56(1)          |
| O(1)  | 6247(6) | 2784(2)  | 5350(1) | 40(1)          |
| O(2)  | 7090(5) | 4118(2)  | 5770(1) | 33(1)          |
| O(3)  | 3053(5) | 5894(2)  | 5783(1) | 38(1)          |
| O(4)  | 5775(5) | 6721(2)  | 5627(1) | 34(1)          |
| O(5)  | 4578(4) | 8567(2)  | 5341(1) | 34(1)          |
| O(6)  | 5870(4) | 6721(2)  | 6573(1) | 36(1)          |
| N(1)  | 4844(6) | 4266(3)  | 5267(1) | 31(1)          |
| N(2)  | 5120(6) | 7460(3)  | 5905(1) | 33(1)          |
| C(1)  | 4467(6) | 5961(3)  | 5572(1) | 30(1)          |
| C(2)  | 5132(7) | 5318(3)  | 5198(1) | 28(1)          |
| C(3)  | 3717(6) | 5248(3)  | 4802(1) | 27(1)          |
| C(4)  | 3972(7) | 4116(3)  | 4831(1) | 30(1)          |
| C(5)  | 6106(7) | 3640(3)  | 5456(1) | 30(1)          |
| C(6)  | 4202(6) | 5787(3)  | 4382(1) | 26(1)          |
| C(7)  | 4507(6) | 6799(3)  | 4391(1) | 28(1)          |
| C(8)  | 4855(7) | 7327(3)  | 4009(1) | 29(1)          |
| C(9)  | 4958(6) | 6847(3)  | 3599(1) | 25(1)          |
| C(10) | 4677(6) | 5830(3)  | 3594(1) | 28(1)          |
| C(11) | 4294(6) | 5312(3)  | 3976(1) | 28(1)          |
| C(12) | 5338(6) | 7412(3)  | 3187(1) | 28(1)          |
| C(13) | 6183(7) | 8341(3)  | 3202(1) | 32(1)          |
| C(14) | 6519(7) | 8882(4)  | 2818(2) | 37(1)          |
| C(15) | 6026(7) | 8464(4)  | 2423(1) | 39(1)          |
| C(16) | 5190(8) | 7550(4)  | 2390(2) | 40(1)          |

|       |          |          |         |       |
|-------|----------|----------|---------|-------|
| C(17) | 4857(7)  | 7026(4)  | 2776(1) | 33(1) |
| C(18) | 8752(8)  | 3654(3)  | 5982(2) | 40(1) |
| C(19) | 10278(8) | 3503(5)  | 5630(2) | 53(1) |
| C(20) | 8200(9)  | 2696(4)  | 6205(2) | 48(1) |
| C(21) | 9366(8)  | 4435(4)  | 6314(2) | 47(1) |
| C(22) | 5374(6)  | 7423(3)  | 6363(2) | 30(1) |
| C(23) | 4852(6)  | 8450(3)  | 6500(1) | 28(1) |
| C(24) | 4676(6)  | 8846(4)  | 6918(2) | 32(1) |
| C(25) | 4191(6)  | 9849(4)  | 6951(2) | 35(1) |
| C(26) | 3994(6)  | 10429(3) | 6578(2) | 35(1) |
| C(27) | 4170(6)  | 10014(3) | 6155(2) | 31(1) |
| C(28) | 4573(6)  | 9025(3)  | 6125(1) | 28(1) |
| C(29) | 4741(6)  | 8384(3)  | 5725(2) | 30(1) |

---

## Compound SI-46 and 73

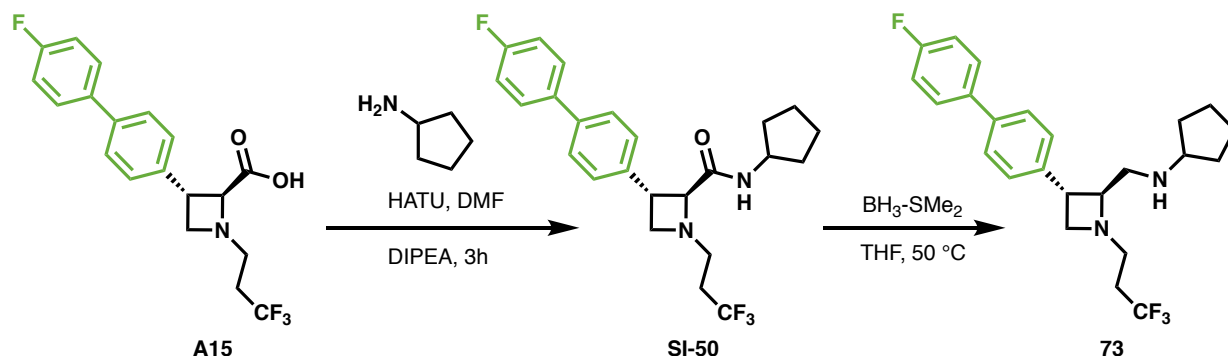

### (2S,3S)-N-cyclopentyl-3-(4'-fluoro-[1,1'-biphenyl]-4-yl)-1-(3,3,3-trifluoropropyl)azetidine-2-carboxamide (SI-46)

To a reaction vessel containing (2S,3S)-3-(4'-fluoro-[1,1'-biphenyl]-4-yl)-1-(3,3,3-trifluoropropyl)azetidine-2-carboxylic acid **A15** (147 mg, 0.4 mmol, 1.0 equiv.) was added DMF (1.6 mL, 0.25 M) and cooled to 0 °C before the addition of *N,N*-diisopropylethylamine (139  $\mu$ L, 0.8 mmol, 2.0 equiv.), HATU (152 mg, 0.4 mmol, 1.0 equiv.), and cyclopentylamine (37.5 mg, 0.4 mmol, 1.1 equiv.) in sequence. The ice bath was removed, and the reaction was allowed to warm to room temperature and stirred for 30 minutes. The reaction mixture was then diluted with EtOAc and washed with water (2x) and brine (1x). The resulting organic layer was dried over Na<sub>2</sub>SO<sub>4</sub>, filtered, and concentrated *in vacuo*. Purification by flash column chromatography (silica, 4:1 Hexanes:EtOAc) afforded 116 mg (67%) of the title compound **SI-46**.

**Physical State:** colorless sticky oil.

**<sup>1</sup>H NMR (600 MHz, CDCl<sub>3</sub>):**  $\delta$  7.54 – 7.47 (m, 4H), 7.38 (d,  $J$  = 8.2 Hz, 1H), 7.22 (d,  $J$  = 8.2 Hz, 1H), 7.11 (t,  $J$  = 8.7 Hz, 2H), 4.26 (q,  $J$  = 6.9 Hz, 1H), 3.94 (t,  $J$  = 6.7 Hz, 1H), 3.69 – 3.60 (m, 2H), 3.11 (t,  $J$  = 7.4 Hz, 1H), 2.86 (dt,  $J$  = 12.5, 7.6 Hz, 1H), 2.71 (dt,  $J$  = 12.5, 6.2 Hz, 1H), 2.25 – 2.17 (m, 2H), 2.03 (tt,  $J$  = 13.5, 6.0 Hz, 2H), 1.77 – 1.60 (m, 5H), 1.45 (dq,  $J$  = 27.7, 6.9 Hz, 2H) ppm.

**<sup>19</sup>F NMR (376 MHz, CDCl<sub>3</sub>):**  $\delta$  -64.85, -116.04 ppm.

**<sup>13</sup>C NMR (151 MHz, CDCl<sub>3</sub>):**  $\delta$  171.2, 162.6 (d,  $J_{C-F}$  = 246.5 Hz), 139.2 (d,  $J_{C-F}$  = 66.6 Hz), 137.1 (d,  $J_{C-F}$  = 3.2 Hz), 128.7 (d,  $J_{C-F}$  = 8.0 Hz), 127.5, 127.3, 115.7 (d,  $J_{C-F}$  = 19.3 Hz), 73.2, 57.5, 51.0 – 50.9 (m), 50.5, 40.9, 32.2 (q,  $J_{C-F}$  = 28.1 Hz), 23.9 (d,  $J_{C-F}$  = 3.3 Hz) ppm.

**HRMS (ESI-TOF):** calc'd for C<sub>24</sub>H<sub>27</sub>F<sub>4</sub>N<sub>2</sub>O [M+H]<sup>+</sup>: 435.2060, found: 435.2062.

**TLC:** R<sub>f</sub> = 0.26 (4:1 Hexanes:EtOAc).

[α]<sub>D</sub><sup>20</sup> = 53.42 (c = 1.12, MeOH).

**N-(((2*S*,3*S*)-3-(4'-fluoro-[1,1'-biphenyl]-4-yl)-1-(3,3,3-trifluoropropyl)azetid-2-yl)methyl)cyclopentanamine (73)**

To a reaction vessel containing (2*S*,3*S*)-*N*-cyclopentyl-3-(4'-fluoro-[1,1'-biphenyl]-4-yl)-1-(3,3,3-trifluoropropyl)azetid-2-carboxamide **SI-46** (96 mg, 0.22 mmol, 1.0 equiv.) was added THF (1.1 mL, 0.2 M). The reaction mixture was cooled to 0 °C before the slow addition of Borane-dimethyl sulfide complex (BH<sub>3</sub>-SMe<sub>2</sub>, 0.55 mL (2 M), 1.1 mmol, 5 equiv.). The reaction mixture was allowed to warm to room temperature, then was heated to 50 °C, followed by TLC, upon full conversion of starting material. The mixture was then cooled in an ice bath, and MeOH (1 mL) was added dropwise. The mixture was stirred at room temperature for 20 minutes, then Rochelle salt's solution was added and the reaction mixture was stirred overnight. The clear solution was extracted with EtOAc (3x) and the combined organics were washed with brine, dried over Na<sub>2</sub>SO<sub>4</sub> and concentrated *in vacuo*. Purification by flash column chromatography (silica, 1:1 Hexanes:EtOAc) afforded 45 mg (49%) of the title compound **73**.

**Physical State:** colorless oil

**<sup>1</sup>H NMR (600 MHz, CDCl<sub>3</sub>):** δ 7.52 – 7.45 (m, 4H), 7.36 (d, *J* = 7.5 Hz, 2H), 7.12 (t, *J* = 8.6 Hz, 2H), 3.85 (t, *J* = 7.2 Hz, 1H), 3.71 (bs, 1H), 3.37 (bs, 1H), 3.13 (bs, 1H), 3.05 – 2.92 (m, 2H), 2.82 (dd, *J* = 13.0, 4.1 Hz, 1H), 2.68 (td, *J* = 12.1, 10.8, 5.2 Hz, 1H), 2.41 – 2.16 (m, 2H), 1.94 – 1.82 (m, 2H), 1.79 – 1.68 (m, 3H), 1.65 – 1.36 (m, 5H) ppm.

**<sup>19</sup>F NMR (376 MHz, CDCl<sub>3</sub>):** δ -65.02, -115.93 ppm.

**<sup>13</sup>C NMR (151 MHz, CDCl<sub>3</sub>):** δ 162.6 (d, *J*<sub>C-F</sub> = 246.5 Hz), 138.9, 137.0 (d, *J*<sub>C-F</sub> = 3.2 Hz), 128.7 (d, *J*<sub>C-F</sub> = 8.3 Hz), 128.0, 127.2, 115.8 (d, *J*<sub>C-F</sub> = 20.9 Hz), 60.4, 58.6, 51.2, 39.1, 32.9 (q, *J*<sub>C-F</sub> = 28.1 Hz), 24.1 (d, *J*<sub>C-F</sub> = 3.3 Hz) ppm.

**HRMS (ESI-TOF):** calc'd for C<sub>24</sub>H<sub>29</sub>F<sub>4</sub>N<sub>2</sub> [M+H]<sup>+</sup>: 421.2267, found: 421.2266.

**TLC:** R<sub>f</sub> = 0.54 (9:1 CH<sub>2</sub>Cl<sub>2</sub>:MeOH).

[α]<sub>D</sub><sup>20</sup> = -88.46 (c = 0.92, MeOH).



## Compound 75

Route A:

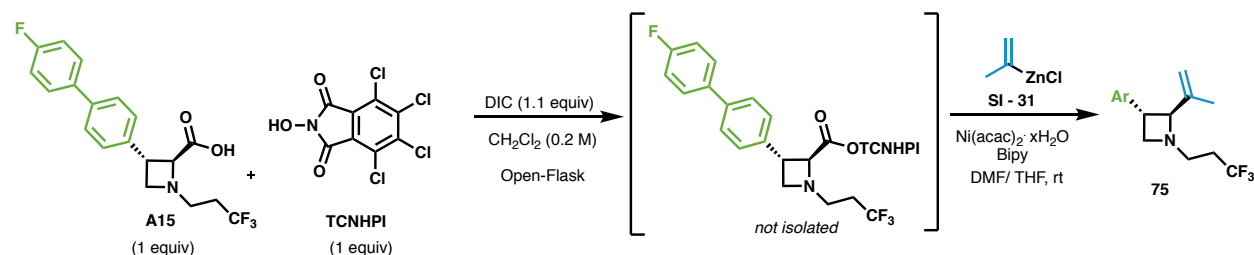

### (2*S*,3*S*)-3-(4'-fluoro-[1,1'-biphenyl]-4-yl)-2-(prop-1-en-2-yl)-1-(3,3,3-trifluoropropyl)azetidine (75)

A culture tube was charged with carboxylic acid **A15** (36.7 mg, 0.1 mmol, 1.0 equiv.) and TCNHPI (38 mg, 0.1 mmol, 1.0 equiv.),  $\text{CH}_2\text{Cl}_2$  (0.5 mL, anhydrous, 0.2 M) was added and DIC (17  $\mu\text{L}$ , 0.11 mmol, 1.1 equiv.) was added dropwise. The reaction was monitored by TLC, after 1 hour all starting material was consumed and the solvent was removed under reduced pressure. The resulting crude Redox Active Ester was then used following the General Decarboxylation Procedure **C3** in the same reaction vessel. Following General Procedure **C3** on 0.1 mmol with the crude RAE,  $\text{Ni}(\text{acac})_2 \cdot x\text{H}_2\text{O}$  (20 mol%), 2,2'-bipyridine (20 mol%), and Zinc reagent **SI-31** (3.0 equiv.). Purification by pTLC (silica, 4:1 Hexanes:EtOAc) afforded 5.1 mg (14%) of the title compound **75**.

**Physical State:** colorless oil.

**$^1\text{H}$  NMR (600 MHz,  $\text{CDCl}_3$ ):**  $\delta$  7.60 – 7.46 (m, 4H), 7.29 (d,  $J = 7.9$  Hz, 2H), 7.12 (t,  $J = 8.7$  Hz, 2H), 5.04 (s, 1H), 4.87 (s, 1H), 3.81 – 3.79 (m, 1H), 3.54 – 3.47 (m, 2H), 2.95 – 2.93 (m, 1H), 2.87 – 2.83 (m, 1H), 2.70 – 2.65 (m, 1H), 2.30 – 2.19 (m, 2H), 1.76 (s, 3H).

**$^{19}\text{F}$  NMR (376 MHz,  $\text{CDCl}_3$ ):**  $\delta$  -115.86 ppm.

**$^{13}\text{C}$  NMR (151 MHz,  $\text{CDCl}_3$ ):**  $\delta$  162.6 (d,  $J_{\text{C-F}} = 246.5$  Hz), 139.0, 137.0 (d,  $J_{\text{C-F}} = 3.3$  Hz), 128.7 (d,  $J_{\text{C-F}} = 8.2$  Hz), 127.8, 127.3, 115.8 (d,  $J_{\text{C-F}} = 21.4$  Hz), 112.1, 79.0, 58.0, 51.2, 41.9, 32.6 (q,  $J_{\text{C-F}} = 28.7$  Hz), 18.8.

**HRMS (ESI-TOF):** calc'd for  $\text{C}_{21}\text{H}_{22}\text{F}_4\text{N}$  [ $\text{M}+\text{H}$ ] $^+$ : 364.1688, found: 364.1689.

**TLC:**  $R_f = 0.3$  (10:1 Hexanes:EtOAc).

$[\alpha]_{\text{D}}^{20} = 44.6$  ( $c = 0.1$ ,  $\text{CHCl}_3$ ).

**Chiral SFC:** IG column (3  $\mu\text{m}$ , 4.6x250 mm) under isocratic conditions [3% MeOH /  $\text{CO}_2$  (4

mL/min), 1600 psi backpressure] at 30 °C. The enantiomers were detected by UV light (260 nm).  
 $t_R$  (major) = 1.31 min, > 99 % *ee*.

Racemic:

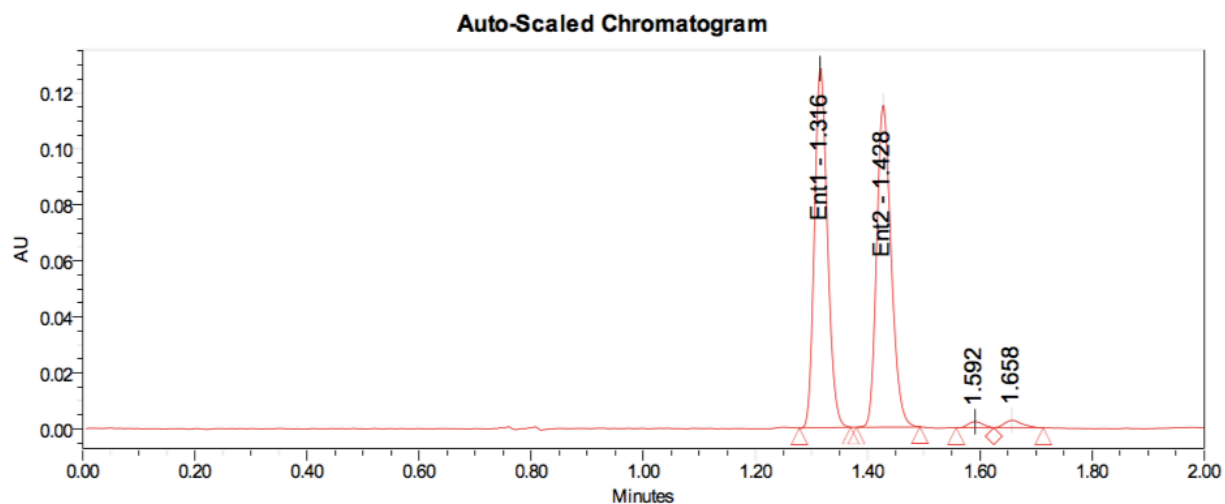

Enantioenriched **75**:

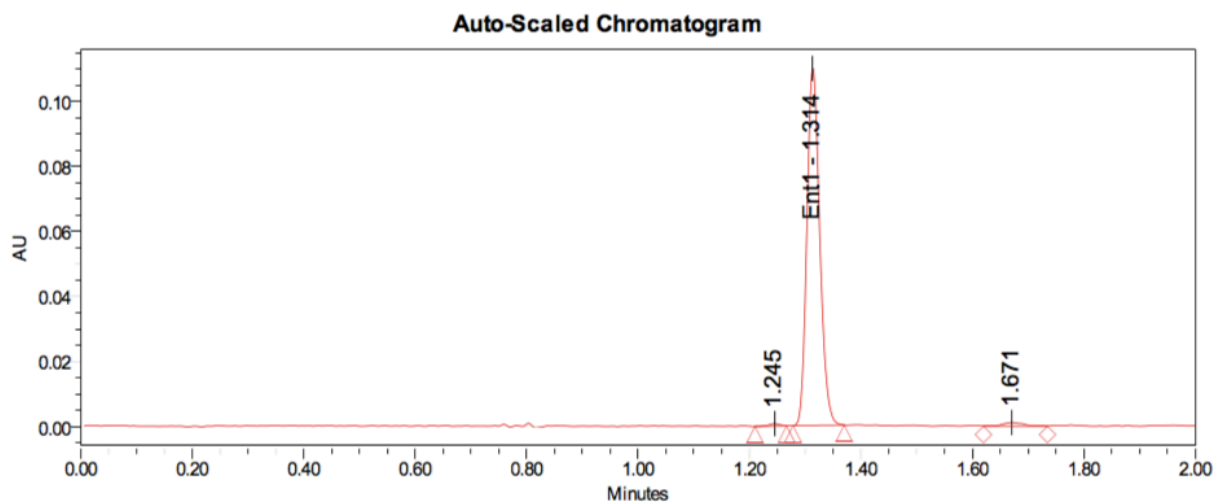

|         |        |       |        |        |        |
|---------|--------|-------|--------|--------|--------|
| KSF-371 | 50.03  | 49.97 | 0.05   | 206771 | 206545 |
| KSF-377 | 100.00 |       | 100.00 | 175697 |        |

Route B:

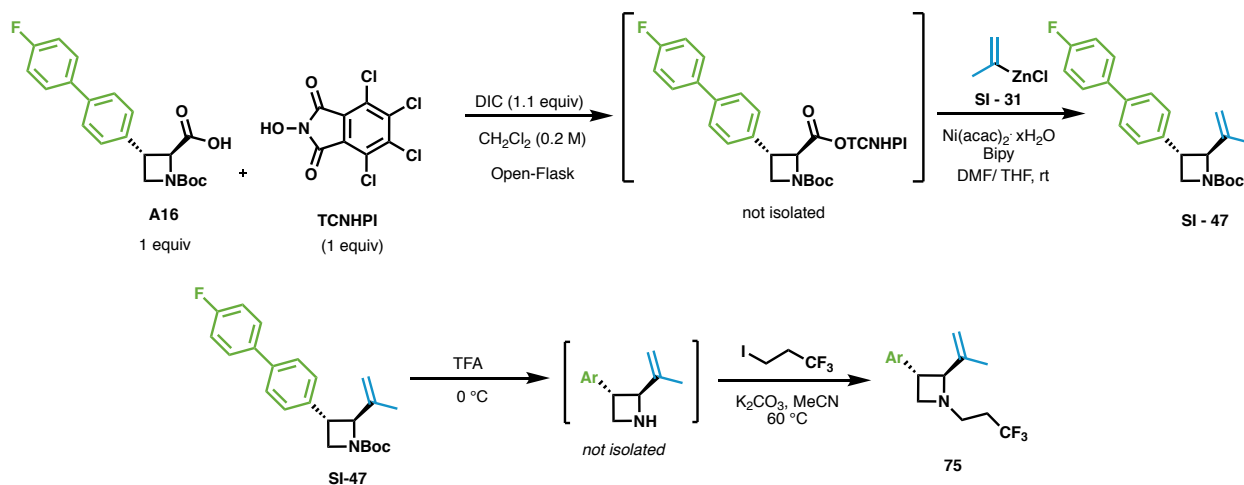

***tert*-butyl (2*S*,3*S*)-3-(4'-fluoro-[1,1'-biphenyl]-4-yl)-2-(prop-1-en-2-yl)azetidine-1-carboxylate (SI-47)**

A culture tube was charged with carboxylic acid **A16** (37.1 mg, 0.1 mmol, 1.0 equiv.) and **TCNHPI** (38 mg, 0.1 mmol, 1.0 equiv.).  $\text{CH}_2\text{Cl}_2$  (0.5 mL, anhydrous, 0.2 M) was added, then  $\text{DIC}$  (17  $\mu\text{L}$ , 0.11 mmol, 1.1 equiv.) was added dropwise. The reaction was monitored by TLC, after 1 hour all starting material was consumed and the solvent was removed under reduced pressure. The resulting crude Redox Active Ester was then used following the General Decarboxylation Procedure **C3** in the same reaction vessel.

Following General Procedure **C3** on 0.1 mmol with the crude RAE,  $\text{Ni}(\text{acac})_2 \cdot x\text{H}_2\text{O}$  (20 mol%), 2,2'-bipyridine (20 mol%), and Zinc reagent **SI-31** (3.0 equiv.). Purification by pTLC (silica, 9:1 Hexanes:EtOAc) afforded 15.6 mg (43%) of the title compound **SI-47**.

**Physical State:** yellow sticky oil.

**$^1\text{H}$  NMR (600 MHz,  $\text{CDCl}_3$ ):**  $\delta$  7.56 – 7.50 (m, 4H), 7.35 (d,  $J = 8.2$  Hz, 2H), 7.12 (t,  $J = 8.7$  Hz, 2H), 5.01 (s, 1H), 4.92 (s, 1H), 4.60 (d,  $J = 6.2$  Hz, 1H), 4.23 (t,  $J = 8.6$  Hz, 1H), 3.98 (t,  $J = 7.6$  Hz, 1H), 3.55 – 3.27 (m, 1H), 1.81 (s, 3H), 1.46 (s, 9H) ppm.

**$^{19}\text{F}$  NMR (376 MHz,  $\text{CDCl}_3$ ):**  $\delta$  -115.86 ppm.

**$^{13}\text{C}$  NMR (151 MHz,  $\text{CDCl}_3$ ):**  $\delta$  163.2 (d,  $J_{\text{C-F}} = 246.5$  Hz), 156.8, 143.7, 139.9 (d,  $J_{\text{C-F}} = 205.8$  Hz), 136.9 (d,  $J_{\text{C-F}} = 3.2$  Hz), 128.7 (d,  $J_{\text{C-F}} = 8.0$  Hz), 127.5 (d,  $J_{\text{C-F}} = 19.3$  Hz), 115.8 (d,  $J_{\text{C-F}} = 21.4$  Hz), 111.5, 79.9, 74.2, 66.0, 53.5, 40.6, 28.5, 17.7, 15.4 ppm.

**HRMS (ESI-TOF):** calc'd for  $\text{C}_{23}\text{H}_{27}\text{FNO}_2$ .  $[\text{M}+\text{H}]^+$ : 368.2026, found: 368.2021.

TLC:  $R_f = 0.4$  (9:1 Hexanes:EtOAc).

$[\alpha]_D^{20} = +18.00$  ( $c = 1$ ,  $\text{CHCl}_3$ ).

**(2*S*,3*S*)-3-(4'-fluoro-[1,1'-biphenyl]-4-yl)-2-(prop-1-en-2-yl)-1-(3,3,3-trifluoropropyl)azetidine (75)**

A culture tube equipped with a stir bar was charged with *tert*-butyl-(2*S*,3*S*)-3-(4'-fluoro-[1,1'-biphenyl]-4-yl)-2-(prop-1-en-2-yl)azetidine-1-carboxylate (**SI-47**) (36.7 mg, 0.1 mmol, 1.0 equiv.) and TFA (2.37 mL, 31 mmol) was added dropwise at 0 °C. The reaction was followed by TLC upon completion of starting material by TLC, 40 minutes. The crude mixture was concentrated *in vacuo* to remove the excess of TFA. Then, the crude mixture was diluted with EtOAc, quenched with saturated  $\text{NaHCO}_3$  solution and extracted with EtOAc (3x). The organic layers were combined, dried over  $\text{Na}_2\text{SO}_4$ , filtered and concentrated *in vacuo*. The crude mixture was transferred to a culture tube and dried under high vacuum for at least 30 minutes, followed by the addition of  $\text{K}_2\text{CO}_3$  (41.4 mg, 0.3 mmol, 3 equiv.). Then evacuated and backfilled with argon from a balloon (3x). Acetonitrile was added (5 mL, 0.02 M) followed by the addition of 1,1,1-Trifluoro-3-iodopropane (0.23 mL, 2 mmol, 20 equiv.). The tube was placed in an oil bath (preheated to 60 °C) for 12 hours. The reaction mixture was then allowed to cool to room temperature and more 1,1,1-Trifluoro-3-iodopropane (0.23 mL, 2 mmol, 20 equiv.) was added to the mixture. The tube was replaced in oil bath for further 12 hours. Then, after 48 hours the reaction was allowed to cool to room temperature and quenched with water. The resulting mixture was extracted with EtOAc (3x), the combined organic phases were dried over  $\text{Na}_2\text{SO}_4$ , filtered and concentrated *in vacuo*. The crude mixture was purified by flash column chromatographic (10:3 Hexanes:EtOAc) to afforded 3.4 mg (9.3 %) of the title compound **75**.

## Compound 76

Route A:

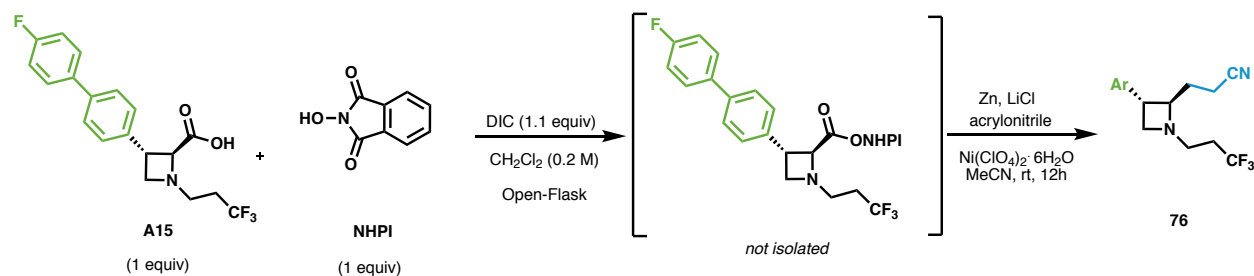

### 3-((2*R*,3*S*)-3-(4'-fluoro-[1,1'-biphenyl]-4-yl)-1-(3,3,3-trifluoropropyl)azetidin-2-yl)propanenitrile (**76**)

A culture tube was charged with carboxylic acid **A15** (36.7 mg, 0.1 mmol, 1.0 equiv.) and TCNHPI (38 mg, 0.1 mmol, 1.0 equiv.). CH<sub>2</sub>Cl<sub>2</sub> (0.5 mL, anhydrous, 0.2 M) was added, then DIC (17 μL, 0.11 mmol, 1.1 equiv.) was added dropwise. The reaction was monitored by TLC, after 1 hour all starting material was consumed and the solvent was removed under reduced pressure. The resulting crude Redox Active Ester was then used in Giese Conjugate Addition reaction (General Procedure **C8**) in the same reaction vessel.

Following General Procedure **C8** on 0.1 mmol scale with the crude RAE and acrylonitrile. Purification by flash column chromatography (silica, 7:3 Hexanes:EtOAc) afforded 7.5 mg (20%) of the title compound **76**.

**Physical State:** colorless oil

**<sup>1</sup>H NMR (400 MHz, CDCl<sub>3</sub>):** δ 7.55 – 7.49 (m, 4H), 7.34 – 7.30 (m, 2H), 7.13 (t, *J* = 8.7 Hz, 2H), 3.85 (t, *J* = 6.8 Hz, 1H), 3.46 – 3.33 (m, 2H), 2.99 – 2.88 (m, 2H), 2.66 (ddd, *J* = 11.8, 9.0, 5.6 Hz, 1H), 2.51 – 2.34 (m, 2H), 2.31 – 2.16 (m, 2H), 2.05 – 2.00 (m, 2H) ppm.

**<sup>19</sup>F NMR (376 MHz, CDCl<sub>3</sub>):** δ -65.37, -115.77 ppm.

**<sup>13</sup>C NMR (151 MHz, CDCl<sub>3</sub>):** δ 162.65 (d, *J*<sub>C-F</sub> = 246.5 Hz), 139.3, 139.1, 136.8 (d, *J*<sub>C-F</sub> = 3.2 Hz), 128.7 (d, *J*<sub>C-F</sub> = 8.0 Hz), 128.0, 127.4, 119.7, 115.8 (d, *J*<sub>C-F</sub> = 21.4 Hz), 71.7, 58.8, 51.1 – 51.0 (m), 41.2, 32.8 (q, *J*<sub>C-F</sub> = 28.2 Hz), 30.4, 13.1 ppm.

**HRMS (ESI-TOF):** calc'd for C<sub>21</sub>H<sub>20</sub>F<sub>4</sub>N<sub>2</sub> [M+H]<sup>+</sup>: 377.1641, found: 377.1642.

**TLC:** R<sub>f</sub> = 0.3 (7:3 Hexanes:EtOAc).

**[α]<sub>D</sub><sup>20</sup>** = -5.40 (*c* = 1, CHCl<sub>3</sub>).

Route B:

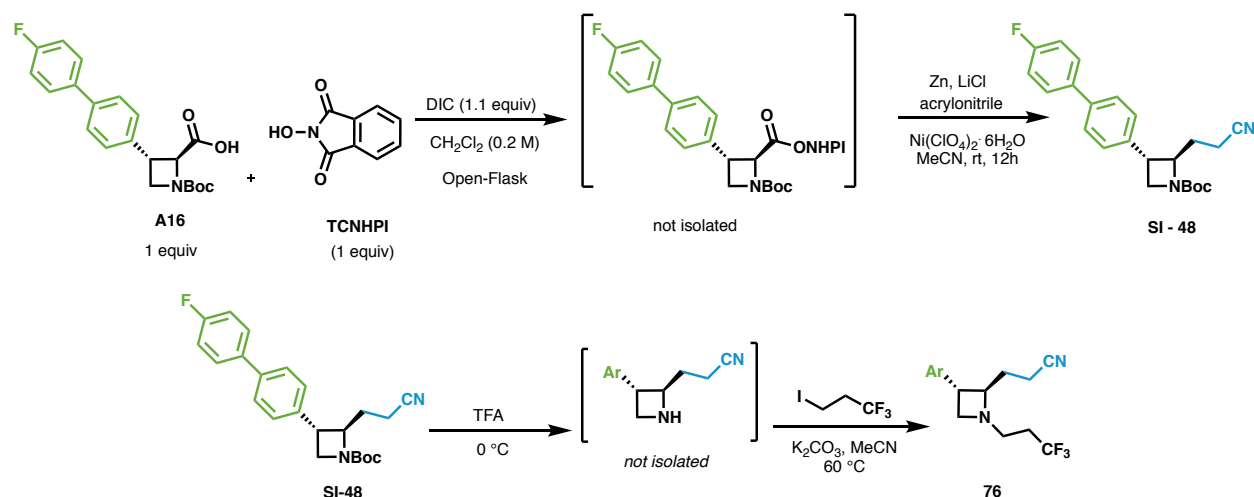

***tert*-butyl (2*R*,3*S*)-2-(2-cyanoethyl)-3-(4'-fluoro-[1,1'-biphenyl]-4-yl)azetidine-1-carboxylate (SI-48)**

A culture tube was charged with carboxylic acid **A16** (184 mg, 0.5 mmol, 1.0 equiv.) and NHPI (89.7 mg, 0.55 mmol, 1.1 equiv.). CH<sub>2</sub>Cl<sub>2</sub> (1.25 mL, anhydrous, 0.4 M) was added, then DIC (85 μL, 0.55 mmol, 1.1 equiv.) was added dropwise. The reaction was monitored by TLC, after 1 hour all starting material was consumed and the solvent was removed under reduced pressure. The resulting crude Redox Active Ester was then used in Giese Conjugate Addition reaction (General Procedure **C8**) in the same reaction vessel.

Following General Procedure **C8** on 0.5 mmol scale with the crude RAE and acrylonitrile. Purification by flash column chromatography (silica, 4:1 Hexanes:EtOAc) afforded 53.1 mg (28%) of the title compound **SI-48**.

**Physical State:** colorless oil.

**<sup>1</sup>H NMR (400 MHz, CDCl<sub>3</sub>):** δ 7.55 – 7.50 (m, 4H), 7.33 (d, *J* = 8.2 Hz, 2H), 7.16 – 7.10 (m, 2H), 4.31 (q, *J* = 6.2 Hz, 1H), 4.21 (t, *J* = 8.7 Hz, 1H), 3.95 (t, *J* = 7.6 Hz, 1H), 3.46 – 3.38 (m, 1H), 2.53 (dq, *J* = 16.7, 8.0, 7.4 Hz, 2H), 2.32 – 2.10 (m, 2H), 1.50 (bs, 9H) ppm.

**<sup>19</sup>F NMR (376 MHz, CDCl<sub>3</sub>):** δ -115.67 ppm.

**<sup>13</sup>C NMR (151 MHz, CDCl<sub>3</sub>):** δ 163.49, 161.86, 139.59, 139.48, 136.8 (d, *J*<sub>C-F</sub> = 3.2 Hz), 128.75, 128.70, 127.61, 127.52, 119.67, 115.92, 115.78, 80.63, 68.53, 54.27, 40.13, 28.54, 19.62, 13.98 ppm.

**HRMS (ESI-TOF):** calc'd for C<sub>23</sub>H<sub>26</sub>FN<sub>2</sub>O<sub>2</sub> [M+H]<sup>+</sup>: 381.1978, found: 381.1971.

**TLC:** *R<sub>f</sub>* = 0.24 (4:1 Hexanes:EtOAc).

**[α]<sub>D</sub><sup>20</sup>** = 19.37 (*c* = 0.95, CHCl<sub>3</sub>).

**3-((2R,3S)-3-(4'-fluoro-[1,1'-biphenyl]-4-yl)-1-(3,3,3-trifluoropropyl)azetidino-2-yl)propanenitrile (76)**

A culture tube equipped with a stir bar was charged with *tert*-butyl-(2R,3S)-2-(2-cyanoethyl)-3-(4'-fluoro-[1,1'-biphenyl]-4-yl)azetidino-1-carboxylate (**SI-48**) (37.4 mg, 0.1 mmol, 1.0 equiv.) and TFA (2.37 mL, 31 mmol) was added dropwise at 0 °C. The reaction was followed by TLC upon completion of starting material by TLC, 40 minutes. The crude mixture was concentrated *in vacuo* to remove the excess of TFA. Then, the crude mixture was diluted with EtOAc, quenched with saturated NaHCO<sub>3</sub> solution and extracted with EtOAc (3x). The organic layers were combined and dried over Na<sub>2</sub>SO<sub>4</sub>, filtered and concentrated *in vacuo*. The crude mixture was transferred to a culture tube and dried under high vacuum for at least 30 minutes, followed by the addition of K<sub>2</sub>CO<sub>3</sub> (41.4 mg, 0.3 mmol, 3 equiv.). Then, the tube was evacuated and backfilled with argon from a balloon (3x). Acetonitrile was added (5 mL, 0.02 M) followed addition of 1,1,1-Trifluoro-3-iodopropane (0.23 mL, 2 mmol, 20 equiv.). The tube was placed in an oil bath (preheated to 60 °C) for 12 hours. The reaction mixture was then allowed to cool to room temperature and more 1,1,1-Trifluoro-3-iodopropane (0.23 mL, 2 mmol, 20 equiv.) were added to the mixture. The tube was replaced in oil bath for further 12 hours. Then, after 48 hours the reaction was allowed to cool to room temperature and quenched with water. The resulting mixture was extracted with EtOAc (3x). The combined organic layers were dried over Na<sub>2</sub>SO<sub>4</sub>, filtered and concentrated *in vacuo*. The crude mixture was purified by flash column chromatographic (silica, 7:3 Hexanes:EtOAc) to afford 14.2 mg (42 %) of the title compound **76**.

## Compound 77

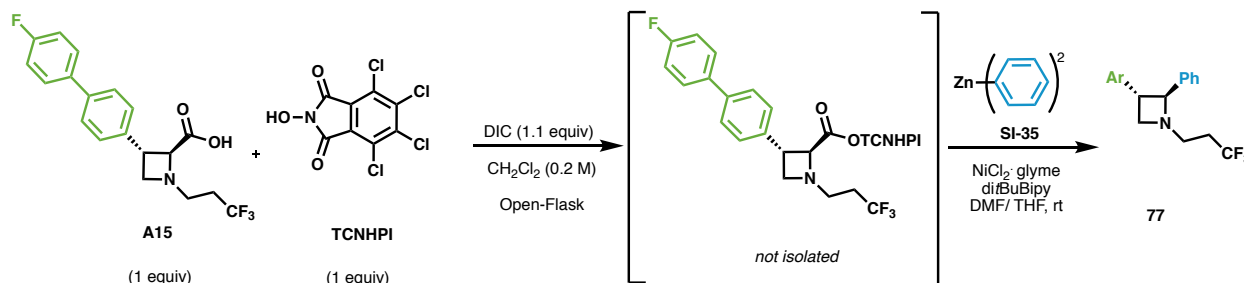

### (2*S*,3*S*)-3-(4'-fluoro-[1,1'-biphenyl]-4-yl)-2-phenyl-1-(3,3,3-trifluoropropyl)azetidone (77)

A culture tube was charged with carboxylic acid **A15** (18.4 mg, 0.05 mmol, 1.0 equiv.) and TCNHPI (19 mg, 0.05 mmol, 1.0 equiv.),  $\text{CH}_2\text{Cl}_2$  (1 mL, anhydrous, 0.05 M) was added, then DIC (17  $\mu\text{L}$ , 0.11 mmol, 1.1 equiv.) was added dropwise. The reaction was monitored by TLC, after 1 hour all starting material was consumed and the solvent was removed reduced pressure. The resulting crude Redox Active Ester was then used following the General Decarboxylation Procedure **C4** in the same reaction vessel.

Following General Procedure **C4** on 0.1 mmol with the crude RAE,  $\text{NiCl}_2 \cdot \text{glyme}$  (20 mol%), di-*t*BuBipy (40 mol%), and Zinc reagent **SI-35** (3.0 equiv.). Purification by pTLC (silica, 2% EtOAc in Hexanes) afforded 3.2 mg (16 %) of the title compound **77**.

**Physical State:** colorless oil

**$^1\text{H}$  NMR (600 MHz,  $\text{CDCl}_3$ ):**  $\delta$  7.54 – 7.50 (m, 2H), 7.48 (d,  $J = 8.1$  Hz, 2H), 7.43 (d,  $J = 7.5$  Hz, 2H), 7.36 (t,  $J = 7.4$  Hz, 2H), 7.31 – 7.27 (m, 3H), 7.12 (t,  $J = 8.7$  Hz, 2H), 4.05 (d,  $J = 8.3$  Hz, 1H), 3.91 (t,  $J = 6.9$  Hz, 1H), 3.57 (d,  $J = 8.6$  Hz, 1H), 3.11 (t,  $J = 7.7$  Hz, 1H), 2.89 (q,  $J = 9.6, 8.5$  Hz, 1H), 2.77 (q,  $J = 10.6, 9.3$  Hz, 1H), 2.18 (s, 2H) ppm.

**$^{19}\text{F}$  NMR (376 MHz,  $\text{CDCl}_3$ ):**  $\delta$  -65.52, -116.01 ppm.

**$^{13}\text{C}$  NMR (151 MHz,  $\text{CDCl}_3$ ):**  $\delta$  162.4 (d,  $J_{\text{C-F}} = 246.2$  Hz), 141.8, 139.6, 138.9, 137.0 (d,  $J_{\text{C-F}} = 3.2$  Hz), 128.7, 128.7, 127.9, 127.9, 127.4, 127.2, 126.9, 126.5 (d,  $J_{\text{C-F}} = 276.3$  Hz), 123.8, 115.8 (d,  $J_{\text{C-F}} = 21.3$  Hz), 57.6, 51.2, 46.0, 32.9 (q,  $J_{\text{C-F}} = 28.3$  Hz).

**TLC:**  $R_f = 0.2$  (9:1 Hexanes: EtOAc).

**$[\alpha]_{\text{D}}^{20} = 4.78$  ( $c = 0.23$ ,  $\text{CHCl}_3$ ).**

*Note: no HRMS could be recorded for 80.*



Route B:

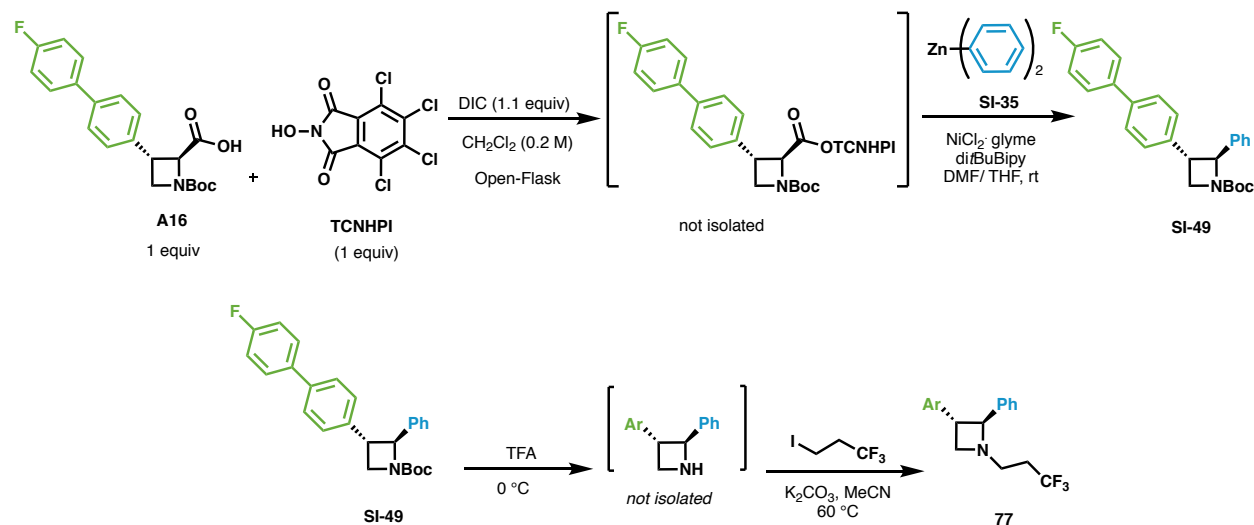

**tert-butyl (2*S*,3*S*)-3-(4'-fluoro-[1,1'-biphenyl]-4-yl)-2-phenylazetidine-1-carboxylate (SI-49)**

A culture tube was charged with carboxylic acid **A16** (37.1 mg, 0.1 mmol, 1.0 equiv.) and TCNHPI (38 mg, 0.1 mmol, 1.0 equiv). CH<sub>2</sub>Cl<sub>2</sub> (0.5 mL, anhydrous, 0.2 M) was added, then DIC (17 μL, 0.11 mmol, 1.1 equiv.) was added dropwise. The reaction was monitored by TLC, after 1 hour all starting material was consumed and the solvent was removed under reduced pressure. The resulting crude Redox Active Ester was then used following the General Decarboxylation Procedure **C4** in the same reaction vessel.

Following General Procedure **C4** on 0.1 mmol with the crude RAE, NiCl<sub>2</sub>•glyme (20 mol%), di*t*BuBipy (40 mol%), and Zinc reagent **SI-35** (3.0 equiv.). Purification by flash column chromatography (silica, 9:1 Hexanes:EtOAc) afforded 22.3 mg (55 %) of the title compound **SI-49**.

**Physical State:** colorless sticky oil.

**<sup>1</sup>H NMR (600 MHz, CDCl<sub>3</sub>):** δ 7.57 – 7.51 (m, 4H), 7.38 (dd, *J* = 6.0, 3.6 Hz, 6H), 7.31 (dt, *J* = 5.8, 2.8 Hz, 1H), 7.16 – 7.08 (m, 2H), 5.20 – 5.07 (m, 1H), 4.40 (t, *J* = 8.6 Hz, 1H), 4.20 – 4.03 (m, 1H), 3.62 (dt, *J* = 8.7, 6.5 Hz, 1H), 1.36 (s, 9H) ppm.

**<sup>19</sup>F NMR (376 MHz, CDCl<sub>3</sub>):** δ -115.81 ppm.

**<sup>13</sup>C NMR (151 MHz, CDCl<sub>3</sub>):** δ 162.6 (d, *J*<sub>C-F</sub> = 249.3 Hz), 156.9, 141.6, 140.1, 139.3, 136.9 (d, *J*<sub>C-F</sub> = 3.3 Hz), 128.8 – 128.6 (m), 127.8 - 127.4 (m), 125.97, 115.8 (d, *J*<sub>C-F</sub> = 21.5 Hz), 80.0, 72.6, 53.6, 44.2, 28.4 ppm.

**HRMS (ESI-TOF):** calc'd for C<sub>26</sub>H<sub>27</sub>FNO<sub>2</sub> [M-Boc+H]<sup>+</sup>: 304.1502, found: 304.1506.

**TLC:** R<sub>f</sub> = 0.45 (9:1 Hexanes:EtOAc).

**(2*S*,3*S*)-3-(4'-fluoro-[1,1'-biphenyl]-4-yl)-2-phenyl-1-(3,3,3-trifluoropropyl)azetidine (77)**

A culture tube equipped with stir bar was charged with *tert*-butyl-(2*S*,3*S*)-3-(4'-fluoro-[1,1'-biphenyl]-4-yl)-2-phenylazetidine-1-carboxylate (**SI-49**) (40.3 mg, 0.1 mmol, 1.0 equiv.) and TFA (2.37 mL) was added dropwise at 0°C. The reaction was followed by TLC upon completion of starting material by TLC, 40 minutes. The crude mixture was concentrated *in vacuo* to remove the excess of TFA. Then, the crude mixture was diluted with EtOAc, quenched with saturated NaHCO<sub>3</sub> solution and extracted with EtOAc (3x). The organic layers were combined and dried over Na<sub>2</sub>SO<sub>4</sub>, filtered and concentrated *in vacuo*. The crude mixture was transferred to a culture tube and dried under high vacuum for at least 30 minutes, followed by the addition of K<sub>2</sub>CO<sub>3</sub> (41.4 mg, 0.3 mmol, 3 equiv.). Then, the tube was evacuated and backfilled with argon from a balloon (3x). Acetonitrile was added (5 mL, 0.02 M) followed addition of 1,1,1-Trifluoro-3-iodopropane (0.23 mL, 2 mmol, 20 equiv.). The tube was placed in an oil bath (preheated to 60 °C) for 12 hours. The reaction mixture was then allowed to cool to room temperature and more 1,1,1-Trifluoro-3-iodopropane (0.23 mL, 2 mmol, 20 equiv.) were added to the mixture. The tube was replaced in oil bath for further 12 hours. Then, after 48 hours the reaction was allowed to cool to room temperature and quenched with water. The resulting mixture was extracted with EtOAc (3x). The combined organic layers were dried over Na<sub>2</sub>SO<sub>4</sub>, filtered and concentrated *in vacuo*. The crude mixture was purified by flash column chromatographic (silica, 1:9 EtOAc:Hexanes) to afforded 3.6 mg (9 %) of the title compound **77**.

## Compound SI-50

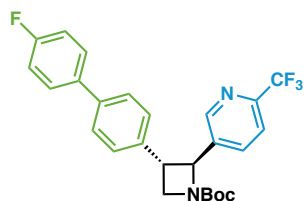

### *tert*-butyl (2*S*,3*S*)-3-(4'-fluoro-[1,1'-biphenyl]-4-yl)-2-(6-(trifluoromethyl)pyridin-3-yl)azetidine-1-carboxylate (SI-50)

Following General Procedure C1 on 0.15 mmol scale with **B9**, NiCl<sub>2</sub>•6H<sub>2</sub>O (40 mol%), BPhen (40 mol%), and boronic acid **SI-14** (3.0 equiv.). Purification by flash column chromatography (silica, 5:1 Hexanes:EtOAc) afforded 26.1mg (37%) of the title compound **SI-50**.

**Physical State:** colorless sticky oil.

**<sup>1</sup>H NMR (600 MHz, CDCl<sub>3</sub>):** δ 8.71 (bs, 1H), 7.90 (dd, *J* = 8.3, 1.7 Hz, 1H), 7.71 (d, *J* = 8.1 Hz, 1H), 7.58 – 7.51 (m, 4H), 7.36 (d, *J* = 8.3 Hz, 2H), 7.16 – 7.11 (m, 2H), 5.26 (d, *J* = 6.1 Hz, 1H), 4.38 (t, *J* = 8.6 Hz, 1H), 4.21 (t, *J* = 8.3 Hz, 1H), 3.63 (q, *J* = 7.2 Hz, 1H), 1.40 (s, 9H) ppm.

**<sup>19</sup>F NMR (376 MHz, CDCl<sub>3</sub>):** -68.01, -115.46 ppm.

**<sup>13</sup>C NMR (151 MHz, CDCl<sub>3</sub>):** δ 162.8 (d, *J*<sub>C-F</sub> = 246.8 Hz), 156.9, 148.0, 140.1 (d, *J*<sub>C-F</sub> = 33.7 Hz), 138.5, 136.7 (d, *J*<sub>C-F</sub> = 3.1 Hz), 134.8, 128.8 (d, *J*<sub>C-F</sub> = 8.1 Hz), 127.7 (d, *J*<sub>C-F</sub> = 20.5 Hz), 120.6, 115.9 (d, *J*<sub>C-F</sub> = 21.6 Hz), 81.0, 69.7, 43.9, 29.8, 28.4 ppm.

**HRMS (ESI-TOF):** calc'd for C<sub>26</sub>H<sub>25</sub>F<sub>4</sub>N<sub>2</sub>O<sub>2</sub> [M+H]: 473.1852, found: 473.1852.

**TLC:** R<sub>f</sub> = 0.41 (4:1 Hexanes:EtOAc).

**[α]<sub>D</sub><sup>20</sup>** = 60.27 (*c* = 0.37, CHCl<sub>3</sub>).

## Compound 78

Route B:

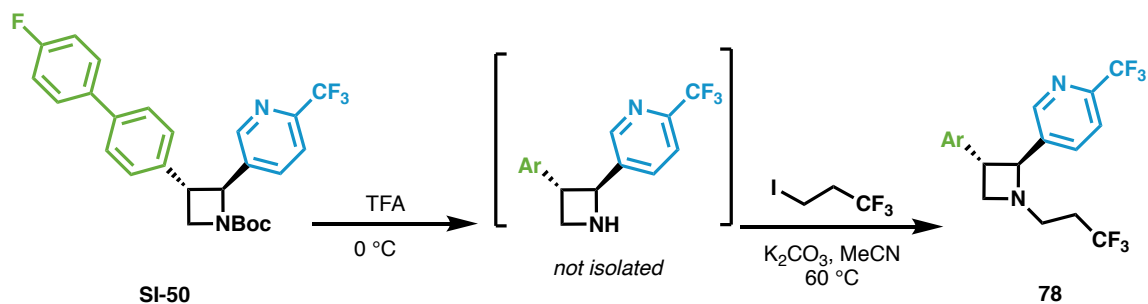

### 5-((2*S*,3*S*)-3-(4'-fluoro-[1,1'-biphenyl]-4-yl)-1-(3,3,3-trifluoropropyl)azetidin-2-yl)-2-(trifluoromethyl)pyridine (78)

A culture tube equipped with a stir bar was charged *tert*-butyl (2*S*,3*S*)-3-(4'-fluoro-[1,1'-biphenyl]-4-yl)-2-(6-(trifluoromethyl)pyridin-3-yl)azetidine-1-carboxylate **SI-50** (15.5 mg, 0.03 mmol, 1.0 equiv.) and TFA (0.78 mL) was added dropwise at 0 °C. The reaction was followed by TLC upon completion of starting material by TLC, 40 minutes. The crude mixture was concentrated *in vacuo* to remove the excess of TFA. Then, the crude mixture was diluted with EtOAc, quenched with saturated NaHCO<sub>3</sub> solution and extracted with EtOAc (3x). The organic layers were combined, dried over Na<sub>2</sub>SO<sub>4</sub>, filtered and concentrated *in vacuo*. The crude mixture was transferred to a culture tube and dried under high vacuum for at least 30 minutes, followed by the addition of K<sub>2</sub>CO<sub>3</sub> (13.8 mg, 0.1 mmol, 3 equiv.). Then, the tube was evacuated and backfilled with argon from a balloon (3x). Acetonitrile was added (1.6 mL, 0.02 M) followed addition of 1,1,1-Trifluoro-3-iodopropane (80 μL, 0.66 mmol, 20 equiv.). The tube was placed in an oil bath (preheated to 60 °C) for 12 hours. The reaction mixture was then allowed to cool to room temperature and more 1,1,1-Trifluoro-3-iodopropane (80 μL, 0.656 mmol, 20 equiv.) were added to the mixture. The tube was replaced in oil bath for further 12 hours. Then, after 48 hours the reaction was allowed to cool to room temperature and quenched with water. The resulting mixture was extracted with EtOAc (3x). The combined organic layers were dried over Na<sub>2</sub>SO<sub>4</sub>, filtered and concentrated *in vacuo*. The crude mixture was purified by pTLC (silica, 9:1 Hexanes:EtOAc) to afforded 2.6 mg (17 %) of the title compound **78**.

**Physical State:** colorless sticky oil

**<sup>1</sup>H NMR (600 MHz, CDCl<sub>3</sub>):** δ 8.74 – 8.69 (m, 1H), 7.98 (s, 1H), 7.70 (d, *J* = 8.0 Hz, 1H), 7.55 – 7.47 (m, 4H), 7.27 (s, 2H), 7.13 (t, *J* = 8.7 Hz, 2H), 4.17 (d, *J* = 7.3 Hz, 1H), 3.97 (m, 1H), 3.53 (d, *J* = 7.2 Hz, 1H), 3.22 (m, 1H), 2.88 (m, 1H), 2.79 (m, 1H), 2.20 (m, 2H) ppm.

**<sup>13</sup>C NMR (151 MHz, CDCl<sub>3</sub>):** δ 162.1 (d, *J*<sub>C-F</sub> = 246.5 Hz), 148.1, 138.9, 137.5, 136.1 (d, *J*<sub>C-F</sub> = 3.3 Hz), 135.2, 128.1 (d, *J*<sub>C-F</sub> = 8.1 Hz), 127.2, 126.9, 120.1, 115.3 (d, *J*<sub>C-F</sub> = 21.5 Hz), 73.6, 57.1, 50.2, 45.6, 32.53 - 31.9 (m) ppm.

**<sup>19</sup>F NMR (376 MHz, CDCl<sub>3</sub>):** δ -65.38, -68.01, -115.65 ppm.

**HRMS (ESI-TOF):** calc'd for C<sub>24</sub>H<sub>20</sub>F<sub>7</sub>N<sub>2</sub> [M+H]<sup>+</sup>: 469.1515, found: 469.1516.

**TLC:** R<sub>f</sub> = 0.2 (9:1 Hexanes:EtOAc).

**[α]<sub>D</sub><sup>20</sup>** = 61.36 (*c* = 0.22, CHCl<sub>3</sub>).

## Compound 80

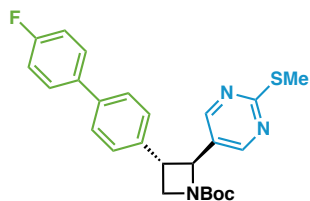

### tert-butyl (2S,3S)-3-(4'-fluoro-[1,1'-biphenyl]-4-yl)-2-(2-(methylthio)pyrimidin-5-yl)azetidine-1-carboxylate (**80**)

Following General Procedure **C1** on 0.038 mmol scale with **B9**, NiCl<sub>2</sub>•6H<sub>2</sub>O (40 mol%), BPhen (40 mol%), and boronic acid **SI-18** (3.0 equiv.). Purification by pTLC (silica, 3:3:14 Hexanes: Ether:EtOAc) afforded 8.6 mg (50%) of the title compound **80**.

**Physical State:** white solid.

**<sup>1</sup>H NMR (600 MHz, CDCl<sub>3</sub>):** δ 8.56 (s, 2H), 7.58 – 7.49 (m, 4H), 7.34 (d, *J* = 8.2 Hz, 2H), 7.14 (t, *J* = 8.7 Hz, 2H), 5.09 (d, *J* = 5.7 Hz, 1H), 4.36 (t, *J* = 8.5 Hz, 1H), 4.18 (t, *J* = 7.8 Hz, 1H), 3.66 (q, *J* = 7.1 Hz, 1H), 2.59 (s, 3H), 1.41 (s, 9H) ppm.

**<sup>19</sup>F NMR (376 MHz, CDCl<sub>3</sub>):** δ -115.51 ppm.

**<sup>13</sup>C NMR (151 MHz, CDCl<sub>3</sub>):** δ 171.8, 162.1 (d, *J*<sub>C-F</sub> = 247.1 Hz), 156.7, 156.3, 154.9, 139.3, 137.9, 136.0 (d, *J*<sub>C-F</sub> = 3.2 Hz), 128.7, 128.2 (d, *J*<sub>C-F</sub> = 7.7 Hz), 127.0 (d, *J*<sub>C-F</sub> = 24.2 Hz), 115.4, 115.3 (d, *J*<sub>C-F</sub> = 21.5 Hz), 80.3, 43.0, 27.8, 13.7 ppm.

**HRMS (ESI-TOF):** calc'd for C<sub>25</sub>H<sub>27</sub>FN<sub>3</sub>O<sub>2</sub>S [M+H]<sup>+</sup>: 452.1808, found: 452.1809.

**TLC:** R<sub>f</sub> = 0.35 (3:3:14 Hexanes:Ether:EtOAc)

**[α]<sub>D</sub><sup>20</sup>** = +93.61 (*c* = 0.36, CHCl<sub>3</sub>).

## Compound 79

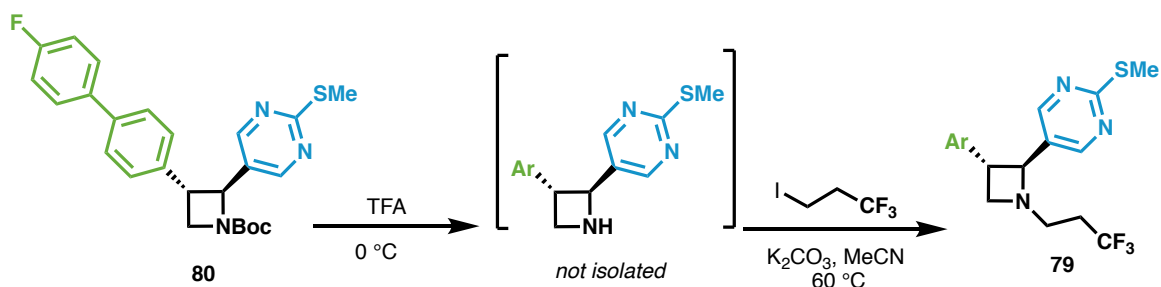

### 5-((2*S*,3*S*)-3-(4'-fluoro-[1,1'-biphenyl]-4-yl)-1-(3,3,3-trifluoropropyl)azetidin-2-yl)-2-(methylthio)pyrimidine (79)

A culture tube equipped with a stir bar was charged with *tert*-butyl-(2*S*,3*S*)-3-(4'-fluoro-[1,1'-biphenyl]-4-yl)-2-phenylazetidine-1-carboxylate **80** (1 mg, 0.0022 mmol, 1.0 equiv.) and TFA (0.1 mL) was added dropwise at 0 °C. The reaction was followed by TLC upon completion of starting material by TLC, 40 minutes. The crude mixture was concentrated *in vacuo* to remove the excess of TFA. Then, the crude mixture was diluted with EtOAc, quenched with saturated NaHCO<sub>3</sub> solution and extracted with EtOAc (3x). The organic layers were combined and dried over Na<sub>2</sub>SO<sub>4</sub>, filtered and concentrated *in vacuo*. The crude mixture was transferred to a culture tube and dried under high vacuum for at least 30 minutes, followed by the addition of K<sub>2</sub>CO<sub>3</sub> (41.4 mg, 0.3 mmol, 3 equiv.). Then, the tube was evacuated and backfilled with argon from a balloon (3x). Acetonitrile was added (5 mL, 0.02 M) followed addition of 1,1,1-Trifluoro-3-iodopropane (0.23 mL, 2 mmol, 20 equiv.). The tube was placed in an oil bath (preheated to 60 °C) for 12 hours. The reaction mixture was then allowed to cool to room temperature and more 1,1,1-Trifluoro-3-iodopropane (0.23 mL, 2 mmol, 20 equiv.) were added to the mixture. The tube was replaced in oil bath for further 12 hours. Then, after 48 hours the reaction was allowed to cool to room temperature and quenched with water. The resulting mixture was extracted with EtOAc (3x). The combined organic layers were dried over Na<sub>2</sub>SO<sub>4</sub>, filtered and concentrated *in vacuo*. The crude mixture was purified by flash column chromatographic (silica, 5:4 Hexanes:EtOAc) to afforded 1.4 mg 61 % of the title compound **79**.

**Physical State:** white solid.

**<sup>1</sup>H NMR (600 MHz, CDCl<sub>3</sub>):** δ 8.58 (s, 2H), 7.53 – 7.43 (m, 4H), 7.24 (d, *J* = 8.2 Hz, 2H), 7.10 (t, *J* = 8.7 Hz, 2H), 3.98-3.93 (m, 2H), 3.54 (d, *J* = 12 Hz, 1H), 3.17-3.15 (m, 1H), 2.87-2.83 (m, 1H), 2.77-2.72 (m, 1H), 2.56 (s, 3H), 2.19-2.16 (m, 2H) ppm.

**<sup>19</sup>F NMR (376 MHz, CDCl<sub>3</sub>):** δ -65.43, -115.71 ppm.

## Compound 81

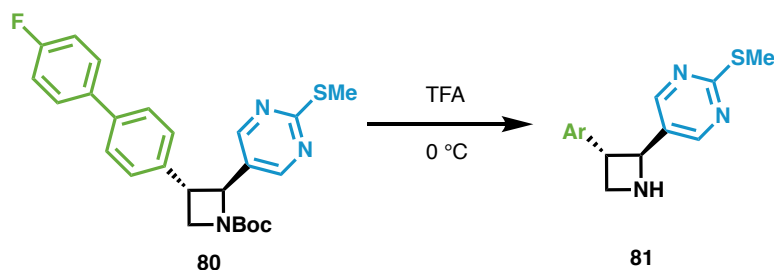

### 5-((2*S*,3*S*)-3-(4'-fluoro-[1,1'-biphenyl]-4-yl)azetidin-2-yl)-2-(methylthio)pyrimidine (**81**)

A culture tube equipped with a stir bar was charged with *tert-butyl* (2*S*,3*S*)-3-(4'-fluoro-[1,1'-biphenyl]-4-yl)-2-(2-(methylthio)pyrimidin-5-yl)azetidine-1-carboxylate **80** (2 mg, 4.4  $\mu\text{mol}$ , 1.0 equiv.) and TFA (0.2 mL) was added dropwise at 0 °C. The reaction was followed by TLC upon completion of starting material by TLC, 40 minutes. The crude mixture was concentrated *in vacuo* to remove the excess of TFA. Then, the crude mixture was diluted with EtOAc (1 mL), quenched with saturated NaHCO<sub>3</sub> solution and extracted with EtOAc (3x 1 mL). The organic layers were combined and dried over Na<sub>2</sub>SO<sub>4</sub>, filtered and concentrated *in vacuo* to afford the desired compound **81** (1.5 mg, 98%) as a colorless oil.

**Physical State:** colorless oil.

**<sup>1</sup>H NMR (600 MHz, CDCl<sub>3</sub>):**  $\delta$  8.33 (s, 2H), 7.47 (dd,  $J = 8.3, 5.1$  Hz, 4H), 7.16 – 7.10 (m, 4H), 5.75 (s, 1H), 5.44 (d,  $J = 10.7$  Hz, 1H), 3.77 (t,  $J = 11.7$  Hz, 1H), 3.72 – 3.62 (m, 1H), 3.37 (dt,  $J = 11.0, 5.5$  Hz, 1H), 2.50 (s, 3H).

**<sup>19</sup>F NMR (376 MHz, CDCl<sub>3</sub>):**  $\delta$  -115.05 ppm.

**<sup>13</sup>C NMR (151 MHz, CDCl<sub>3</sub>):**  $\delta$  173.2, 162.9 (d,  $J_{C-F} = 247.1$  Hz), 155.9, 153.3, 140.7, 136.1 (d,  $J_{C-F} = 3.3$  Hz), 133.9, 128.9, 128.8, 128.8, 128.7, 128.1, 125.7, 116.0 (d,  $J_{C-F} = 21.7$  Hz), 79.5, 46.4, 44.6, 14.3.

**HRMS (ESI-TOF):** calc'd for C<sub>20</sub>H<sub>19</sub>FN<sub>3</sub>S [M+H]<sup>+</sup>: 352.1284, found: 352.1287.

**TLC:** R<sub>f</sub> = 0.2 (pure EtOAc).

**[ $\alpha$ ]<sub>D</sub><sup>20</sup> = 71.1** ( $c = 0.2$ , CHCl<sub>3</sub>).



## Compound 82

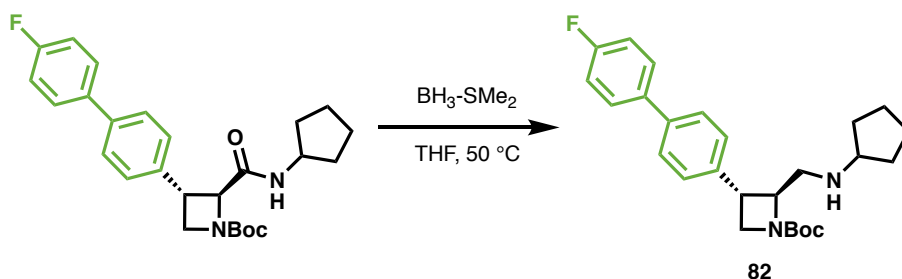

### *tert*-butyl (2*S*,3*S*)-2-((cyclopentylamino)methyl)-3-(4'-fluoro-[1,1'-biphenyl]-4-yl)azetidine-1-carboxylate (**82**)

To a reaction vessel containing *tert*-butyl (2*S*,3*S*)-2-(cyclopentylcarbamoyl)-3-(4'-fluoro-[1,1'-biphenyl]-4-yl)azetidine-1-carboxylate (44 mg, 0.1 mmol, 1.0 equiv.) was added THF (0.5 mL, 0.2 M). The reaction mixture was cooled to 0 °C before the slow addition of a 2 M solution of Borane-dimethyl sulfide complex in THF (0.15 mL, 0.3 mmol, 3 equiv.). The reaction mixture was allowed to warm to room temperature, followed by TLC, upon full conversion of starting material. The mixture was then cooled in an ice bath, and MeOH (1 mL) was added dropwise. The mixture was stirred at room temperature for 20 minutes, then Rochelle salt's solution (3 mL) was added and the reaction mixture was stirred overnight. The clear solution was extracted with EtOAc (3x 2 mL) and the combined organics were washed with brine (1x 8 mL), dried over Na<sub>2</sub>SO<sub>4</sub> and concentrated *in vacuo*. Purification by flash column chromatography (silica, 1:2 Hexanes:EtOAc) afforded 36 mg (84%) of the title compound **82** as a colorless oil.

**Physical State:** colorless oil.

**<sup>1</sup>H NMR (600 MHz, CDCl<sub>3</sub>):** δ 7.59 – 7.41 (m, 4H), 7.34 (d, *J* = 8.1 Hz, 2H), 7.12 (t, *J* = 8.7 Hz, 2H), 4.40 (s, 1H), 4.18 (t, *J* = 8.6 Hz, 1H), 3.94 (t, *J* = 7.4 Hz, 1H), 3.59 (q, *J* = 6.7 Hz, 1H), 3.17 – 3.08 (m, 1H), 3.04 (m, 1H), 2.96 (m, 1H), 1.89 – 1.80 (m, 2H), 1.76 – 1.63 (m, 4H), 1.54 (d, *J* = 4.3 Hz, 1H), 1.48 (s, 9H), 1.37 (s, 2H) ppm.

**<sup>19</sup>F NMR (376 MHz, CDCl<sub>3</sub>):** δ -115.99 ppm.

**<sup>13</sup>C NMR (151 MHz, CDCl<sub>3</sub>):** δ 162.62 (d, *J* = 246.4 Hz), 139.11, 136.97 (d, *J* = 3.3 Hz), 128.71 (d, *J* = 8.1 Hz), 127.63, 127.39, 115.80 (d, *J* = 21.4 Hz), 80.15, 59.99, 52.64, 37.98, 33.20, 29.85, 28.61, 28.55, 24.16 ppm.

**HRMS (ESI-TOF):** calc'd for C<sub>20</sub>H<sub>19</sub>FN<sub>3</sub>S [M+H]<sup>+</sup>: 425.2604, found: 425.2607.

**TLC:** R<sub>f</sub> = 0.33 (1:2 Hexanes:EtOAc).

**[α]<sub>D</sub><sup>20</sup>** = 59.2 (*c* = 0.1, CHCl<sub>3</sub>).

## Compound 83

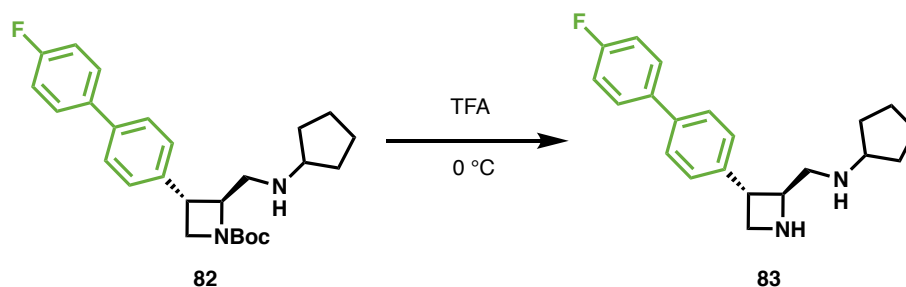

### *N*-(((2*S*,3*S*)-3-(4'-fluoro-[1,1'-biphenyl]-4-yl)azetidino-2-yl)methyl)cyclopentanamine (**83**)

A culture tube equipped with a stir bar was charged with *tert*-butyl ((2*S*,3*S*)-2-((cyclopentylamino)methyl)-3-(4'-fluoro-[1,1'-biphenyl]-4-yl)azetidine-1-carboxylate **82** (5 mg, 12  $\mu$ mol, 1.0 equiv.) and TFA (0.6 mL) was added dropwise at 0 °C. The reaction was followed by TLC upon completion of starting material by TLC, 40 minutes. The crude mixture was concentrated *in vacuo* to remove the excess of TFA. Then, the crude mixture was diluted with EtOAc (2 mL), quenched with saturated NaHCO<sub>3</sub> solution and extracted with EtOAc (3x 1 mL). The organic layers were combined and dried over Na<sub>2</sub>SO<sub>4</sub>, filtered and concentrated *in vacuo* to afford the desired compound **83** (1.5 mg, 98%) as a colorless oil.

**Physical State:** colorless oil.

**<sup>1</sup>H NMR (600 MHz, CDCl<sub>3</sub>):**  $\delta$  7.61 (d,  $J$  = 7.4 Hz, 2H), 7.57 – 7.51 (m, 2H), 7.37 (d,  $J$  = 7.7 Hz, 2H), 7.17 (t,  $J$  = 7.6 Hz, 2H), 5.16 (s, 1H), 4.29 (d,  $J$  = 46.1 Hz, 1H), 4.07 (s, 1H), 3.94 (m, 1H), 3.47 (m, 1H), 3.16 (d,  $J$  = 12.6 Hz, 1H), 2.12 – 1.84 (m, 6H), 1.78 (m, 2H), 1.66 (m, 1H).

**<sup>13</sup>C NMR (151 MHz, CDCl<sub>3</sub>):**  $\delta$  162.3 (d,  $J$  = 247.6 Hz), 140.7, 135.6 (d,  $J$  = 3.2 Hz), 133.6, 128.2 (d,  $J$  = 8.1 Hz), 127.6, 127.0, 115.5 (d,  $J$  = 21.6 Hz), 61.8, 60.67, 49.0, 45.4, 41.3, 29.96 – 28.47 (m), 23.33.

**<sup>19</sup>F NMR (376 MHz, CDCl<sub>3</sub>):**  $\delta$  -115.81 ppm.

**HRMS (ESI-TOF):** calc'd for C<sub>20</sub>H<sub>19</sub>FN<sub>3</sub>S [M+H]<sup>+</sup>: 325.2080, found: 325.2078.

**TLC:** R<sub>f</sub> = 0.25 (2:8 MeOH:DCM).

**$[\alpha]_D^{20}$**  = 64.3 ( $c$  = 0.1, CHCl<sub>3</sub>).

## Biological assays: Comments, Procedures and Results (Figure 5-c)

### Importance of the trans-relationship between the biaryl substituent and the vicinal group

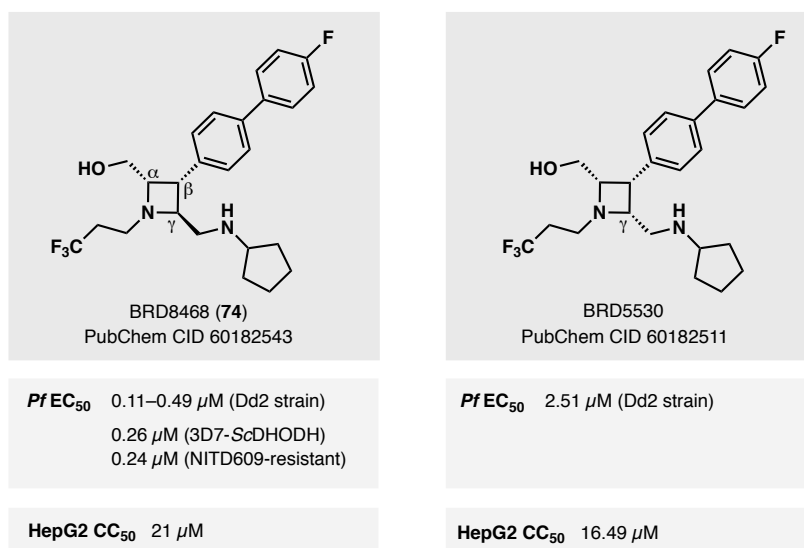

BRD8468 is a more potent *P. falciparum* inhibitor than its  $\gamma$ -epimer BRD5530, and remains equipotent against *Pf* 3D7-ScDHODH and NITD609-resistant *Pf*. All data were retrieved from PubChem (<https://pubchem.ncbi.nlm.nih.gov/>) using the CID compound identifiers shown above.

### Example of tolerated diversity at azetidine nitrogen

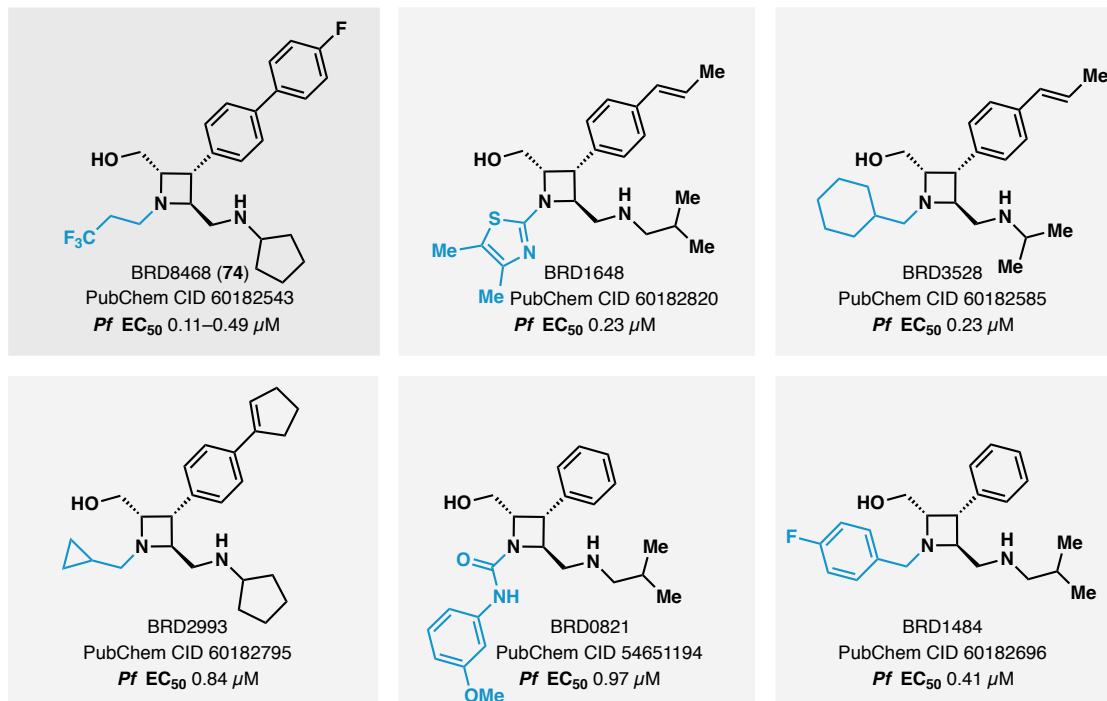

**Azetidine amine antimalarial chemotype tolerates modifications at azetidine nitrogen.** Selected examples of BRD8468 analogs exhibiting submicromolar *in vitro* EC<sub>50</sub> against *P. falciparum* (Dd2 strain). All data were retrieved from PubChem (<https://pubchem.ncbi.nlm.nih.gov/>) using the CID compound identifiers shown above.

## **Materials**

### **Reagents**

RPMI Medium 1640 (without phenol red, Cat. # 11835-055), gentamicin (Cat. # 15710-072), sodium bicarbonate (Cat. # H9377), Hepes (Cat. # H4034), Glucose (Cat. # G5400), and sodium hydroxide (Cat. # S8045) are from Sigma and together with human serum (O<sup>+</sup>, Interstate Bank) comprise the “complete” media used for routine maintenance of parasite cultures or alternatively together with Albumax II (Cat. # 11021-045, Invitrogen) comprises the “screening” media used for *in vitro* efficacy testing in 384-well format. Lysis buffer and detection components include EDTA (Cat. # E7889) and Triton X-100 (Cat. #T8787) from Sigma, Tris-HCl (Cat. # BP1756) from Fisher, Saponin (Cat. # AC41923) from Acros Organics and SYBR Green I (Cat. # S7567) from Invitrogen. Human serum whole blood (O<sup>+</sup>) is from Interstate Blood Bank. Giemsa stain is from Ricca Chemical Company, Cat. # 3250-4.

### **Parasites**

*Plasmodium falciparum* strains Dd2L, Dd2-PI4K GFP over-expression line, and Dd2 dual-resistant line (to GNF156 and NITD609) were obtained from the laboratory of David Fidock at Columbia University. Both the D10 (Cat. # MRA-201 from MR4) and D10-ScDHODH expression line were obtained from the laboratory of Akhil Vaidya at Drexel University.

## **Methods**

### **Instrumentation**

Parasitized erythrocytes in screening media, and SYBR Green lysis buffer are dispensed using a MultiFlo from BioTek. Compound transfer is carried out by using the Labcyte ECHO Acoustic Liquid Handler. SYBR Green fluorescence is read on an Envision Multimode Reader, and parasitemia is determined using a light microscope (Primovert) with a Zeiss A-plan 100×/1.25 Oil Immersion objective.

### ***Plasmodium falciparum* propagation and parasitemia determination**

Parasitized erythrocytes from each respective strain are passaged when parasitemia levels reach 8–10% via dilution into fresh culture medium to a final concentration of 1% parasitemia. Specifically, parasitized erythrocytes are transferred into prewarmed complete media containing RPMI 1640 (no phenol red) with L-glutamine, 0.05mg/mL gentamicin, 0.014 mg/mL hypoxanthine, 38.4 mM Hepes, 0.20% sodium bicarbonate, 0.20% Glucose, 3.4 nM NaOH, 5%

human serum and 1.25% albumax. Uninfected fresh erythrocytes are added to achieve a final concentration of 5% hematocrit for subsequent rounds of parasite invasion and proliferation. Cultures are maintained in 10 mL volumes in 25 cm<sup>2</sup> tissue culture flasks (Fisher Cat. # 10-126-39). The freshly diluted culture is gassed with a low oxygen mixture (96% nitrogen, 3% carbon dioxide, 1% oxygen) and incubated at 37°C. Complete media is either added or exchanged every 1–2 days and parasitemia is monitored every 1–3 days, as needed, depending on the growth kinetics. The percent of parasitemia is estimated by obtaining a 1 µL blood smear. The smear is fixed onto the slide by placing in methanol for 30 seconds, stained in 10% Geimsa stain, and the percent of parasitized erythrocytes vs uninfected erythrocytes is determined by microscopy with a light microscope.

### **Plasmodium falciparum culture conditions**

#### *Routine maintenance of parasites*

Using traditional *P. falciparum* protocols established by Trager and Jensen [1976], 10 mL cultures are maintained in 25 cm<sup>2</sup> flasks (Fisher Cat. # 10-126-39) at 5% hematocrit and parasitemia ranging between 1–8%. Once parasitemia reaches 8–10% cultures are diluted to 1% parasitemia. Maintenance requires daily media changes and fresh blood every two weeks. Cultures are gassed for approximately 30 seconds to 1 minute using a blood gas mixture to maintain a gas composition of 96% nitrogen, 3% carbon dioxide and 1% oxygen and incubated at 37°C.

#### *Plasmodium falciparum cultured in 1536-format*

A MultiFlo (BioTek) is used to dispense parasitized erythrocytes, uninfected erythrocytes and RPMI screening media into 1536-well plates (789092-A by Griener Bio-One) in a final volume of 8 µL containing 0.3% parasitemia and 2.5% hematocrit. The plates are incubated for 72 hours at 37°C in a gas chamber in the presence of the low oxygen blood gas mixture.

### **Assay Protocol**

In brief, cultures of the respective *P. falciparum* strains to be used for screening are prepared with screening media (complete media without human serum but supplemented with 0.5% Albumax II) and fresh erythrocytes. Compounds are transferred via the Labcyte ECHO Acoustic Liquid Handler into the assay plates. Parasitized erythrocytes and fresh erythrocytes are prepared with screening media and dispensed into the assay plates containing compound for a final parasitemia of 0.3% and 2.5% hematocrit. The assay plates are directly transferred and cultured in a gas chamber at 37°C in the presence of the low oxygen blood gas. After 72 hours and daily gas exchanges, the assay plates are removed from the incubator and SYBR Green lysis buffer is added

to each well using the MultiFlo. Plates are incubated for an additional 24 hours at room temperature for fluorescence signal development. Fluorescence intensity is read on an Envision Multimode Reader.

#### *Preparation of compound stocks and dilutions*

Compounds are solubilized from powders in 100% DMSO at a final concentration of 10 mM and stored at room temperature by the Calibr Compound Management Group (CMG). Compound dose-response activity plates were prepared by adding 30  $\mu$ L 10 mM stock solution to columns 1 and 13 in a 384-well compound plate. Compounds were transformed into 12-point, 1:3 dilutions by serially transferring 10  $\mu$ L of the prior well to 20  $\mu$ L DMSO.

#### *Treatment of parasitized human erythrocytes with compound*

Compounds are transferred directly into the 1536-well assay plates using the Labcyte ECHO Acoustic Liquid Handler, followed by the addition of a mixture of parasitized human erythrocytes and fresh uninfected human erythrocyte in screening media.

#### *Plasmodium falciparum invasion of human erythrocytes*

Based on the measured parasitemia levels, each culture is added to screening media to yield a final parasitemia of 0.3% and 2.5% hematocrit blood. The dispense step is performed with a MultiFlo and the assay plates are immediately covered using a custom metal lid and placed in a gas chamber purged with a low-oxygen gas mix and incubated at 37°C. The total assay volume is 8  $\mu$ L.

#### *Determination of Plasmodium falciparum proliferation by nucleic acid detection*

After a 72-hour incubation (equivalent to 1–2 cycles during the blood stage) at 37°C under 95% humidity, a prepared mixture of the lysis buffer (5 mM EDTA, 1.6% Triton X-100, 20 mM Tris-HCl, 0.16% Saponin) in water and SYBR Green detection (0.1%) reagent is dispensed at 2  $\mu$ L per well using the MultiFlo. Cultures are incubated for an additional 24 hours at 25°C before measuring fluorescence intensity using the Envision with a 505 Dichroic Bottom Mirror. Excitation and emission filters are 485 nm and 530 nm, respectively.

#### **Data analysis**

Data are normalized based on maximum fluorescence signal values for DMSO-treated wells (no inhibition by compound) and the minimum fluorescence signal values for wells containing the highest concentration of inhibitor control compounds, for example, atovaquone at a final concentration of 12.5  $\mu$ M. Data are analyzed on a plate-by-plate basis and compared to reference compounds that are always included on every plate, typically artemisinin, mefloquine and

atovaquone. The half-maximal effective concentration (EC50) values are obtained using the GeneData curve fitting model. The standard logistic regression model is applied for curve fitting. The quality of the assay run is assessed by the performance of the reference compounds where the EC50 must be within 3-fold of the standard reference values for the assay plate to pass requisite data quality needs. The z-factor for this assay ranges from 0.5–0.8. Additionally, all compounds are typically assayed in duplicate (independent assay plates) and EC50 values ideally must not vary by more than two-fold between plates.

**Table S12. *In vitro* antimalarial potency and cytotoxicity of synthesized di- and tri-substituted azetidines (s.d. = standard deviation, n = number of biological replicates).**

| compound     | EC50 (μM)      |       |   |                   |       |   | CC50 (μM) |   |
|--------------|----------------|-------|---|-------------------|-------|---|-----------|---|
|              | <i>Pf</i> Dd2L |       |   | <i>Pf</i> D10attB |       |   | HEK293T   |   |
|              | average        | s.d.  | n | average           | s.d.  | n | average   | n |
| BRD8468 (72) | 0.465          | 0.094 | 3 | 0.382             |       | 2 | >20.00    | 2 |
| BRD6596 (73) | 4.081          | 1.758 | 3 | 1.620             |       | 2 | 16.70     | 2 |
| 75           | >12.50         |       | 3 | 11.746            |       | 2 | >20.00    | 2 |
| 76           | 12.443         | 0.091 | 3 | 11.129            |       | 2 | >20.00    | 2 |
| 77           | 11.633         | 1.493 | 3 | 10.521            |       | 2 | >20.00    | 2 |
| 78           | 11.694         | 1.144 | 4 | >12.50            |       | 3 | >20.00    | 3 |
| 79           | 12.371         | 0.215 | 3 | 10.351            |       | 2 | >20.00    | 2 |
| 80           | 0.173          | 0.044 | 4 | 0.269             | 0.125 | 3 | >20.00    | 3 |
| 81           | >12.50         |       | 3 | >12.50            |       | 2 | >20.00    | 2 |
| 82           | 1.771          | 0.629 | 3 | 2.251             |       | 2 | 11.01     | 2 |
| 83           | 8.390          | 0.627 | 3 | 8.916             |       | 2 | >20.00    | 2 |



| compound     | Pf Dd2L |       | Pf Dd2-PI4K over-expr. line |       | EC50 (µM) Pf Dd2-mutant PfATP4/PfCARL |       | Pf D10attB |       | Pf D10 - ScDHOD |   | CC50 (µM) HEK293T    |         |   |
|--------------|---------|-------|-----------------------------|-------|---------------------------------------|-------|------------|-------|-----------------|---|----------------------|---------|---|
|              | average | s.d.  | average                     | s.d.  | average                               | s.d.  | average    | s.d.  | average         | n | fold-shift (vs. D10) | average | n |
| BRD8468 (72) | 0.465   | 0.094 | 0.360                       | 2     | 0.299                                 | 2     | 0.382      | 2     | 0.421           | 2 | 1.10                 | >20     | 2 |
| BRD6596 (73) | 4.081   | 1.758 | 3.419                       | 2     | 3.987                                 | 2     | 1.620      | 2     | 1.526           | 2 | 0.94                 | 16.70   | 2 |
| <b>80</b>    | 0.173   | 0.044 | 0.235                       | 0.094 | 0.280                                 | 0.063 | 0.269      | 0.125 | 0.187           | 2 | 0.70                 | >20     | 3 |
| KDU691       | 0.063   |       | 0.608                       | 2     | 0.044                                 | 2     | 0.050      | 2     | 0.016           | 1 | 0.33                 | >20     | 2 |
| GNF156       | 0.008   | 0.004 | 0.009                       | 2     | 4.122                                 | 2     | 0.009      | 2     | 0.005           | 1 | 0.53                 | >20     | 2 |
| ELQ300       | 0.017   |       | 0.033                       | 2     | 0.027                                 | 2     | 0.019      | 2     | >12.5           | 1 | <b>&gt;641</b>       | >20     | 2 |
| atovaquone   | 0.001   | 0.001 | 0.004                       | 2     | 0.003                                 | 2     | 0.002      | 2     | 1.357           | 1 | <b>696.54</b>        | >20     | 2 |
| mefloquine   | 0.004   |       | 0.003                       | 2     | 0.003                                 | 2     | 0.008      | 2     | 0.005           | 1 | 0.65                 | 4.81    | 2 |
| NITD609      | 0.00021 |       | 0.00021                     | 2     | 0.001                                 | 2     | 0.000      | 2     | 0.000           | 1 | 1.08                 | >20     | 2 |

Table S13. *In vitro* antimalarial potency and cytotoxicity of selected azetidines and reference compounds. Compound

**80** remains equipotent against *Pf* drug-resistant strains (s.d. = standard deviation, n = number of biological

# NMR Spectra

Compound B1  $^1\text{H}$  NMR

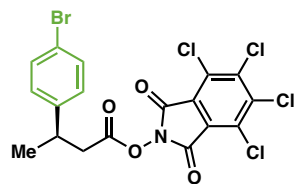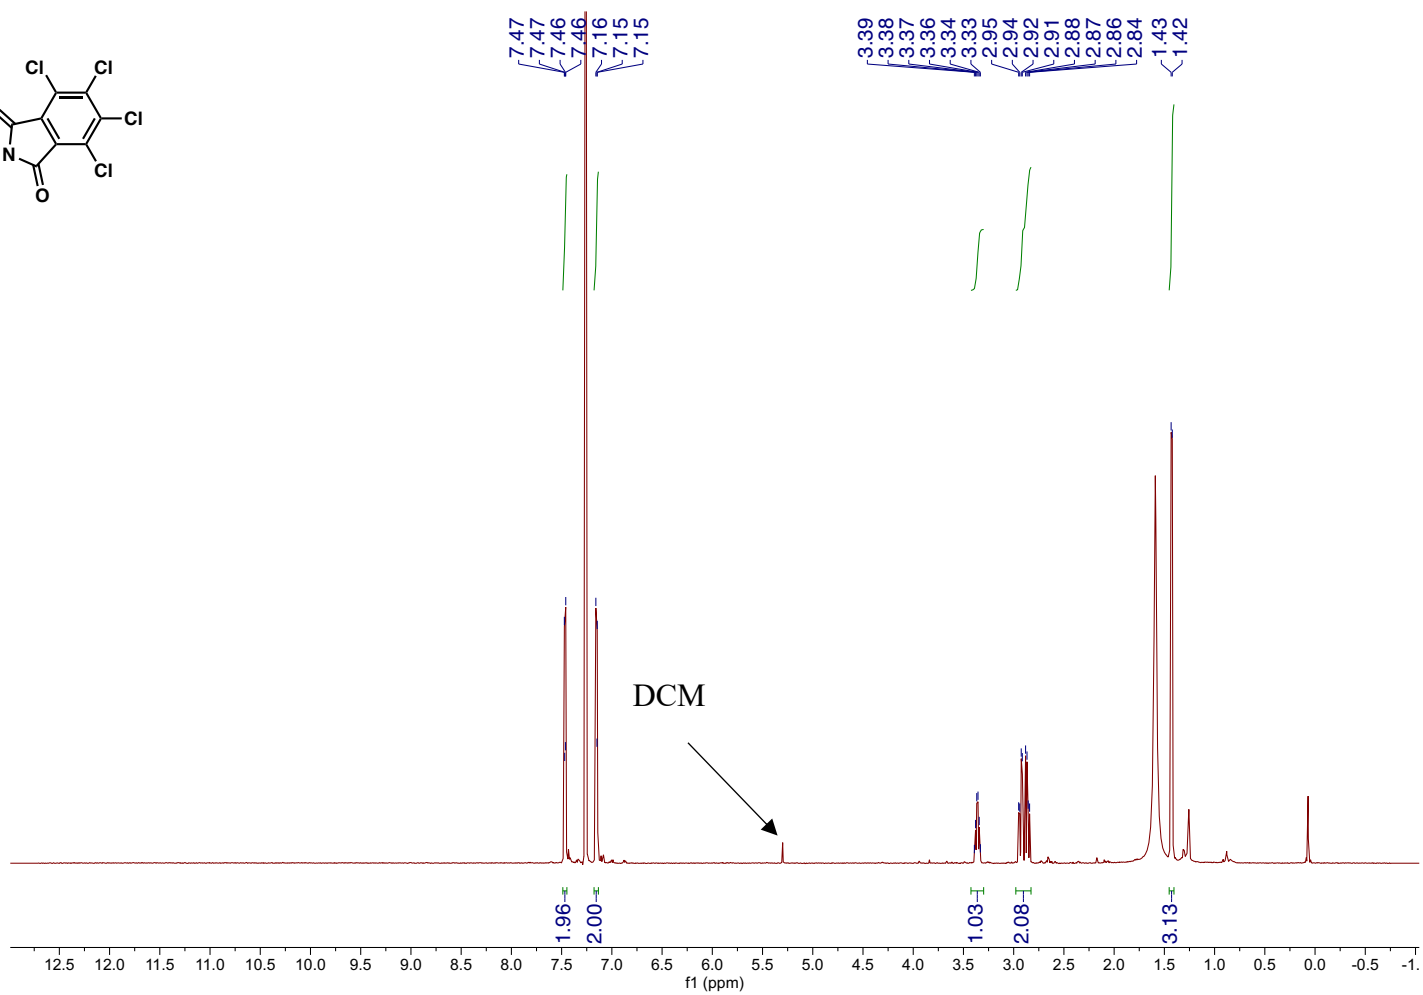

S242

# Compound B1 <sup>13</sup>C NMR

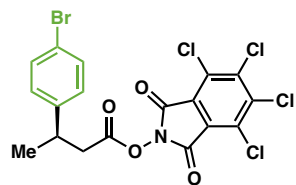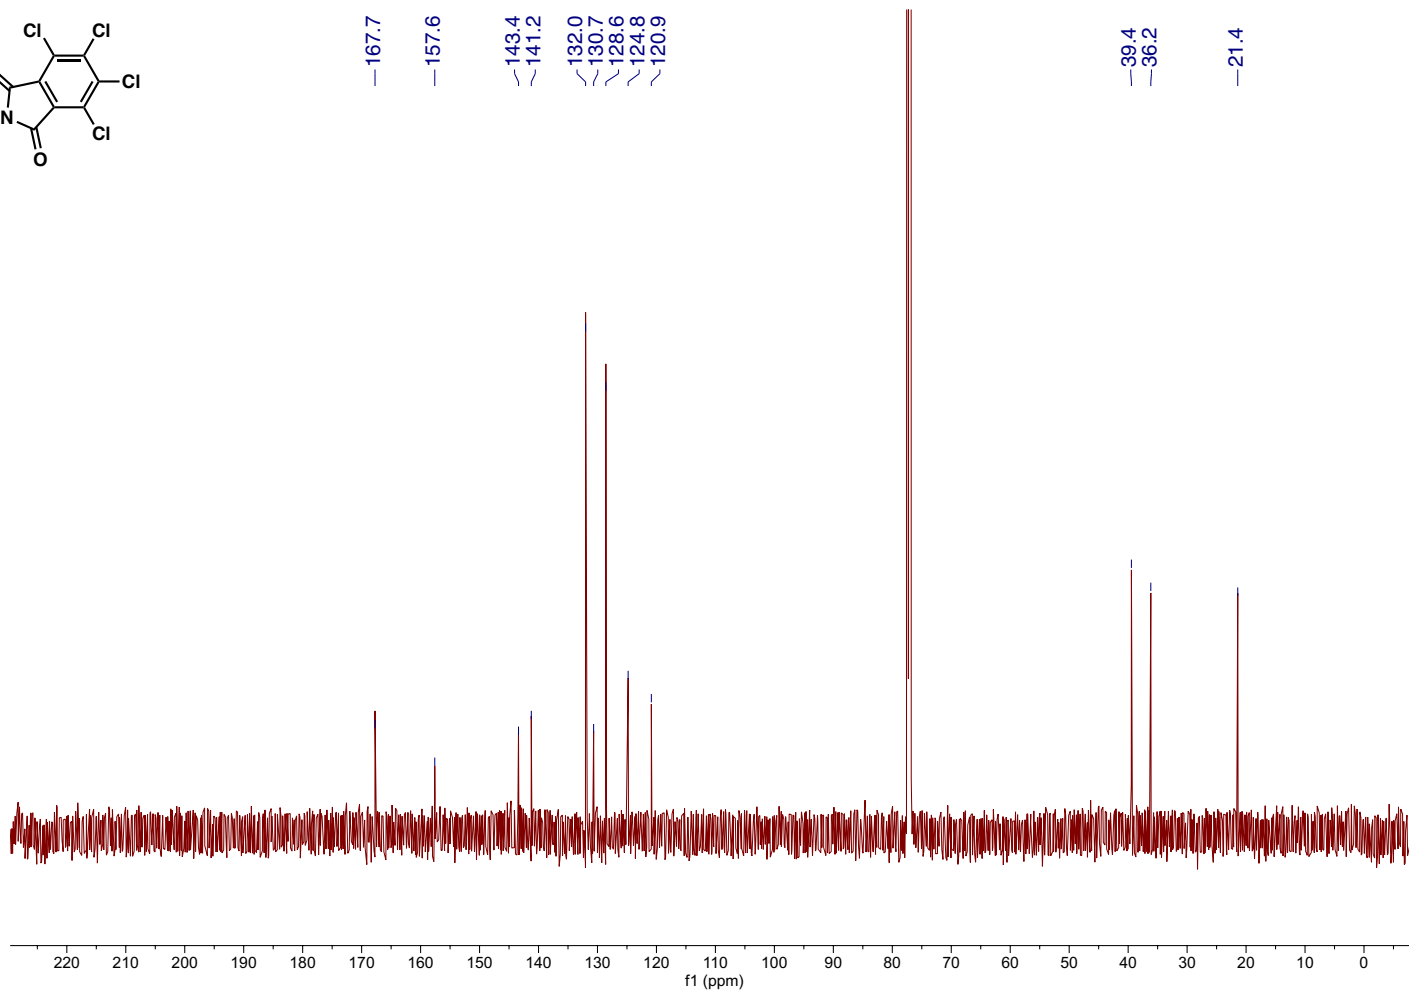

Compound B2 <sup>1</sup>H NMR

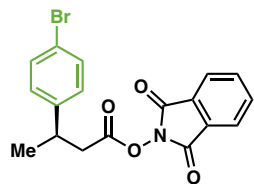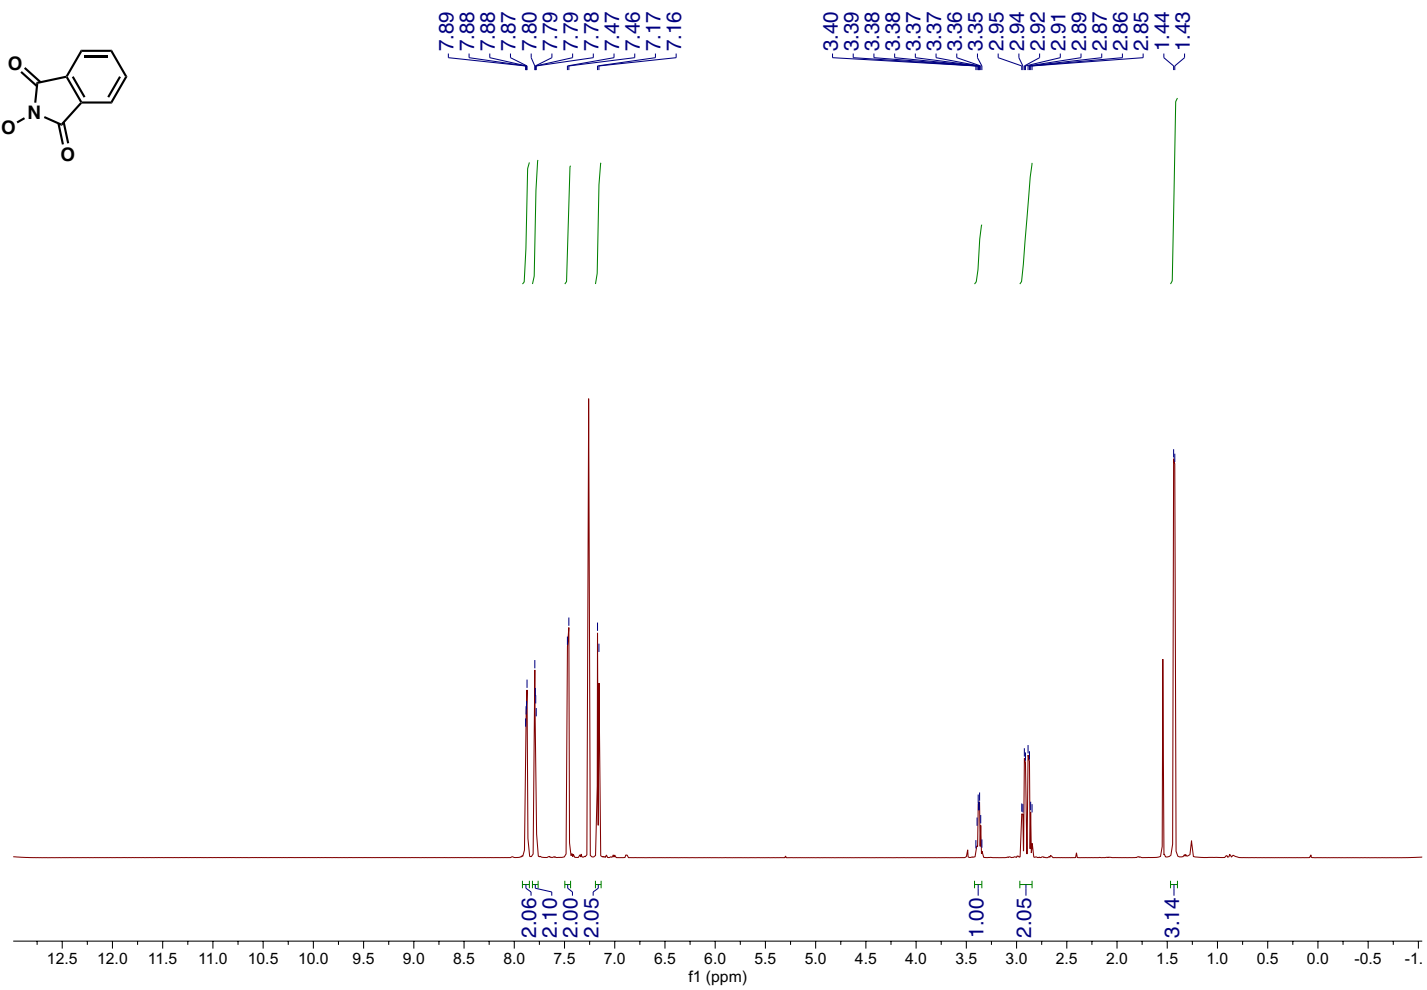

# Compound B2 13C NMR

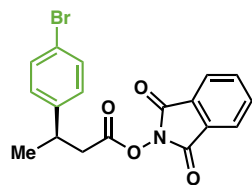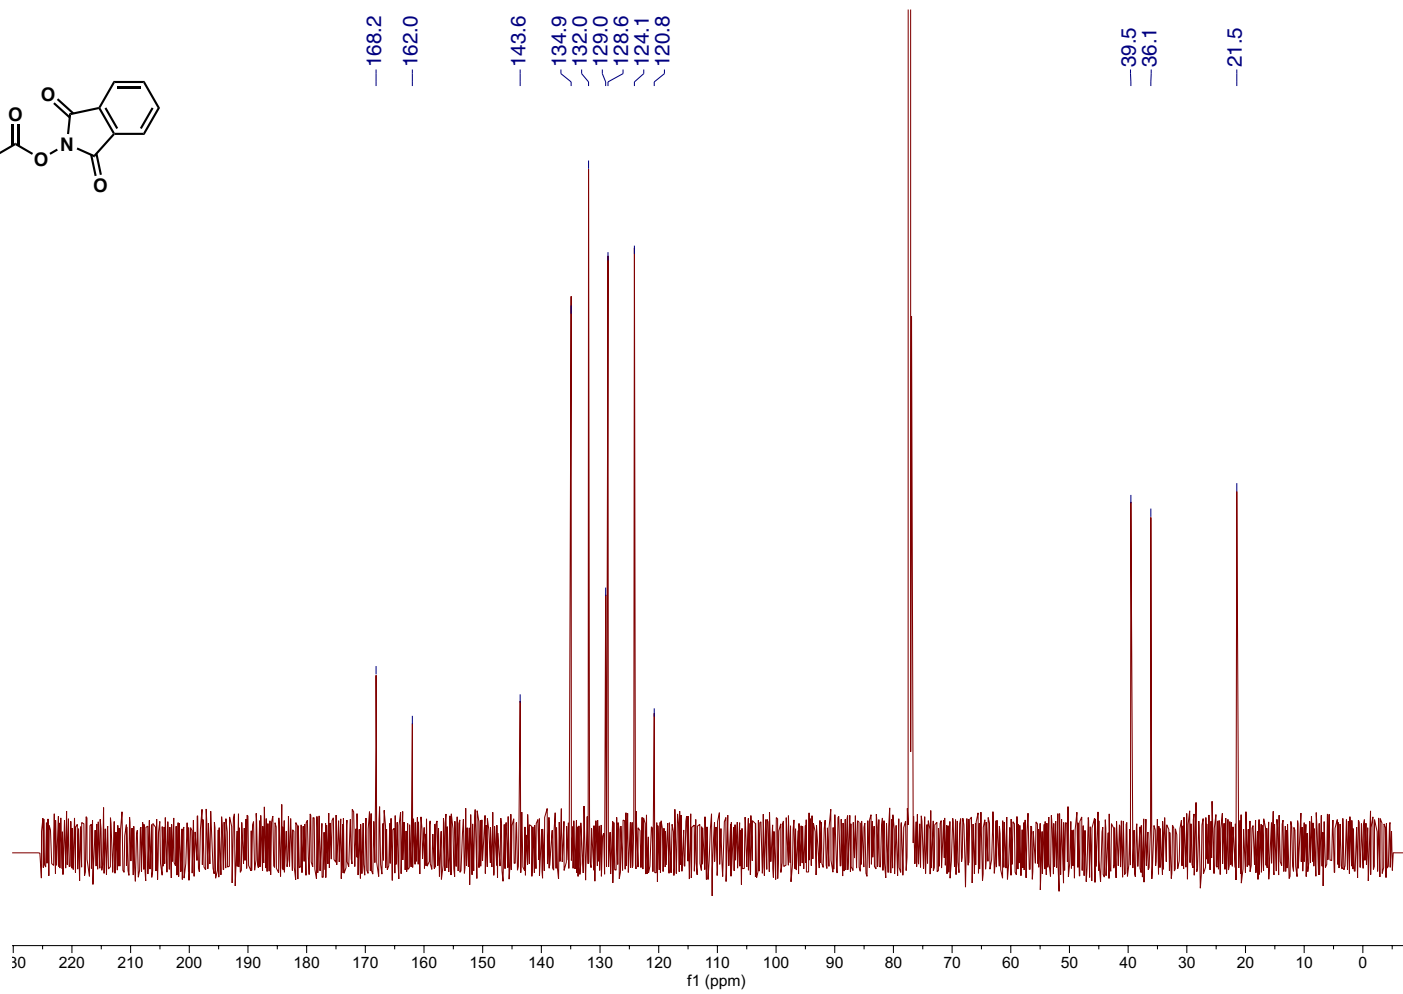

Compound B3 <sup>1</sup>H NMR

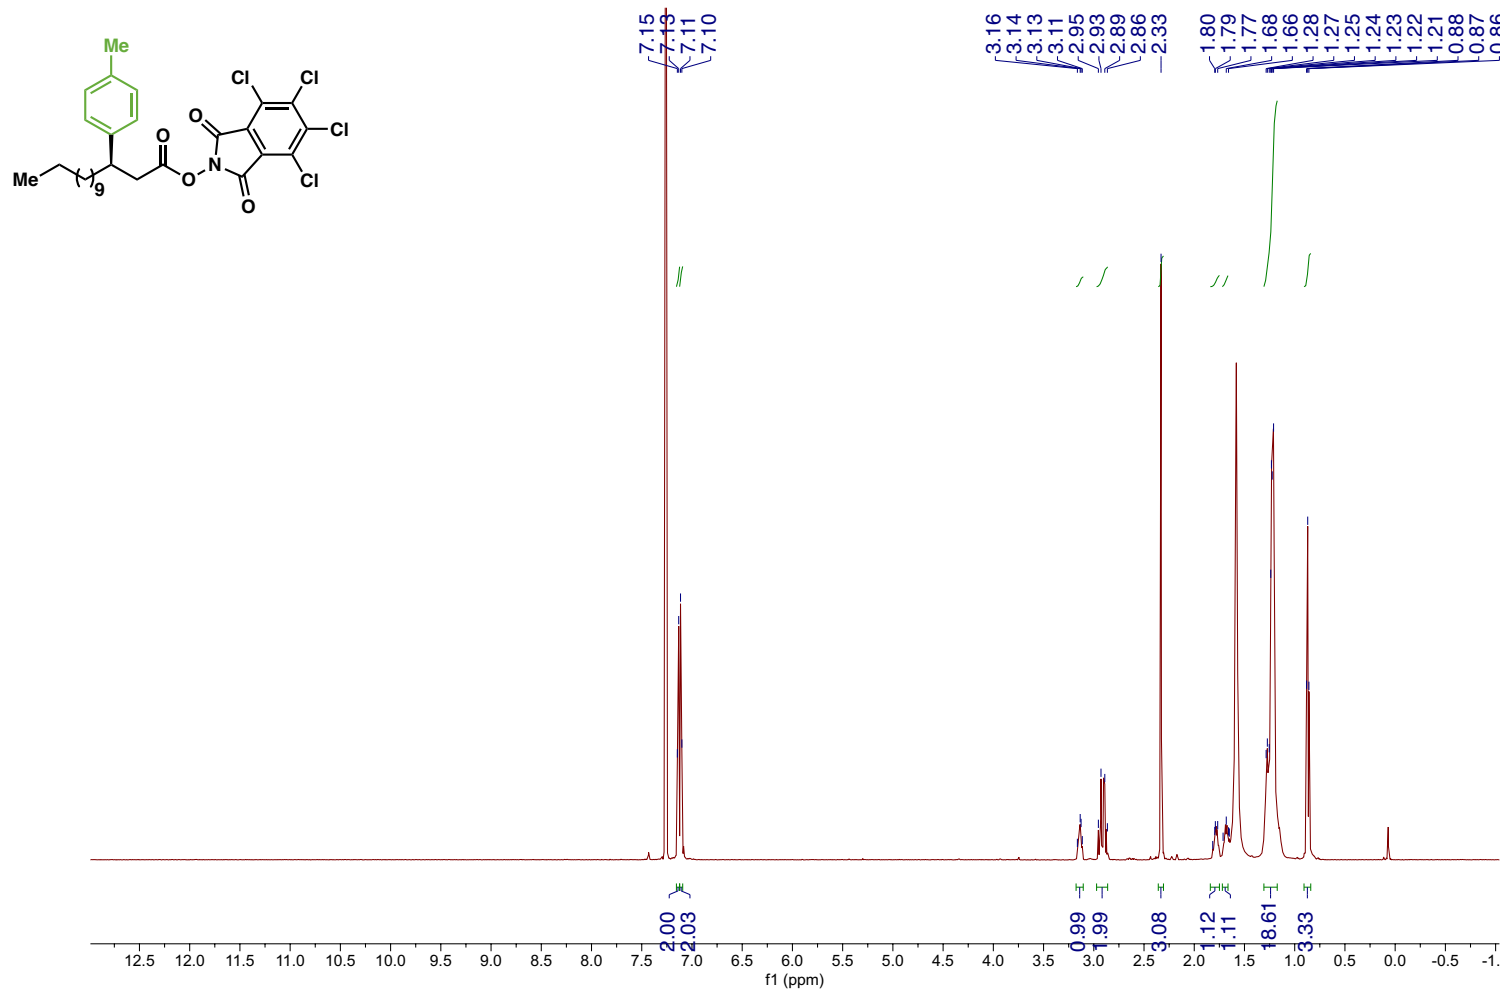

Compound B3 <sup>13</sup>C NMR

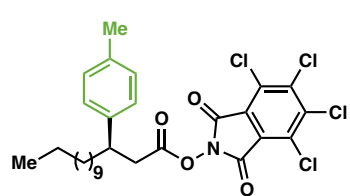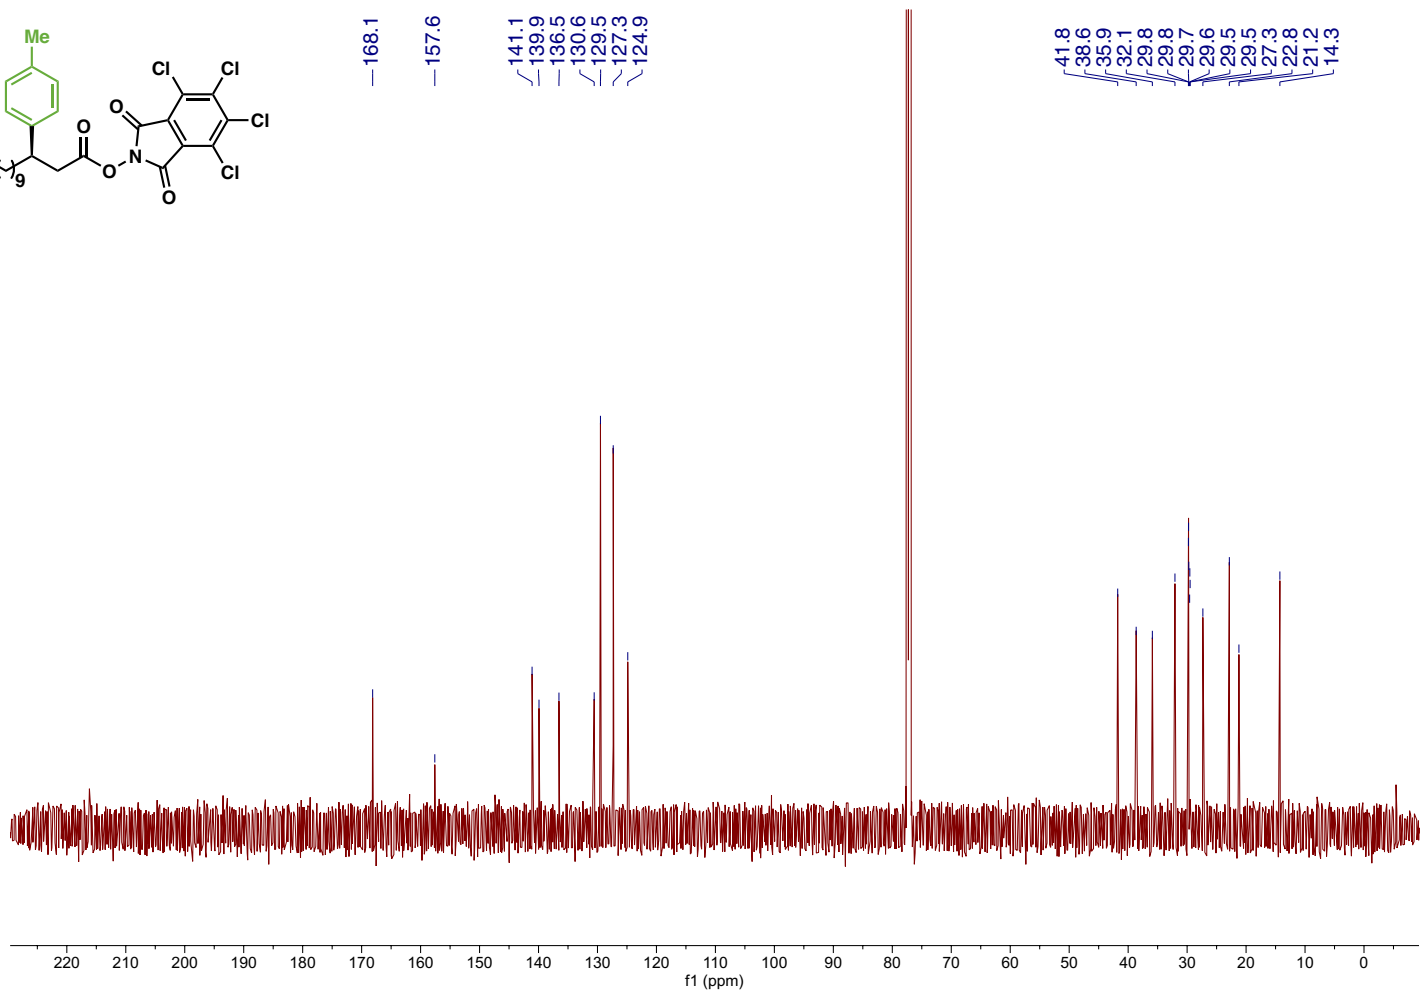

# Compound B4 <sup>1</sup>H NMR

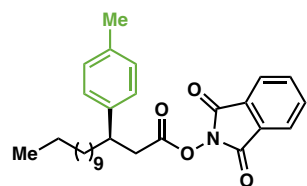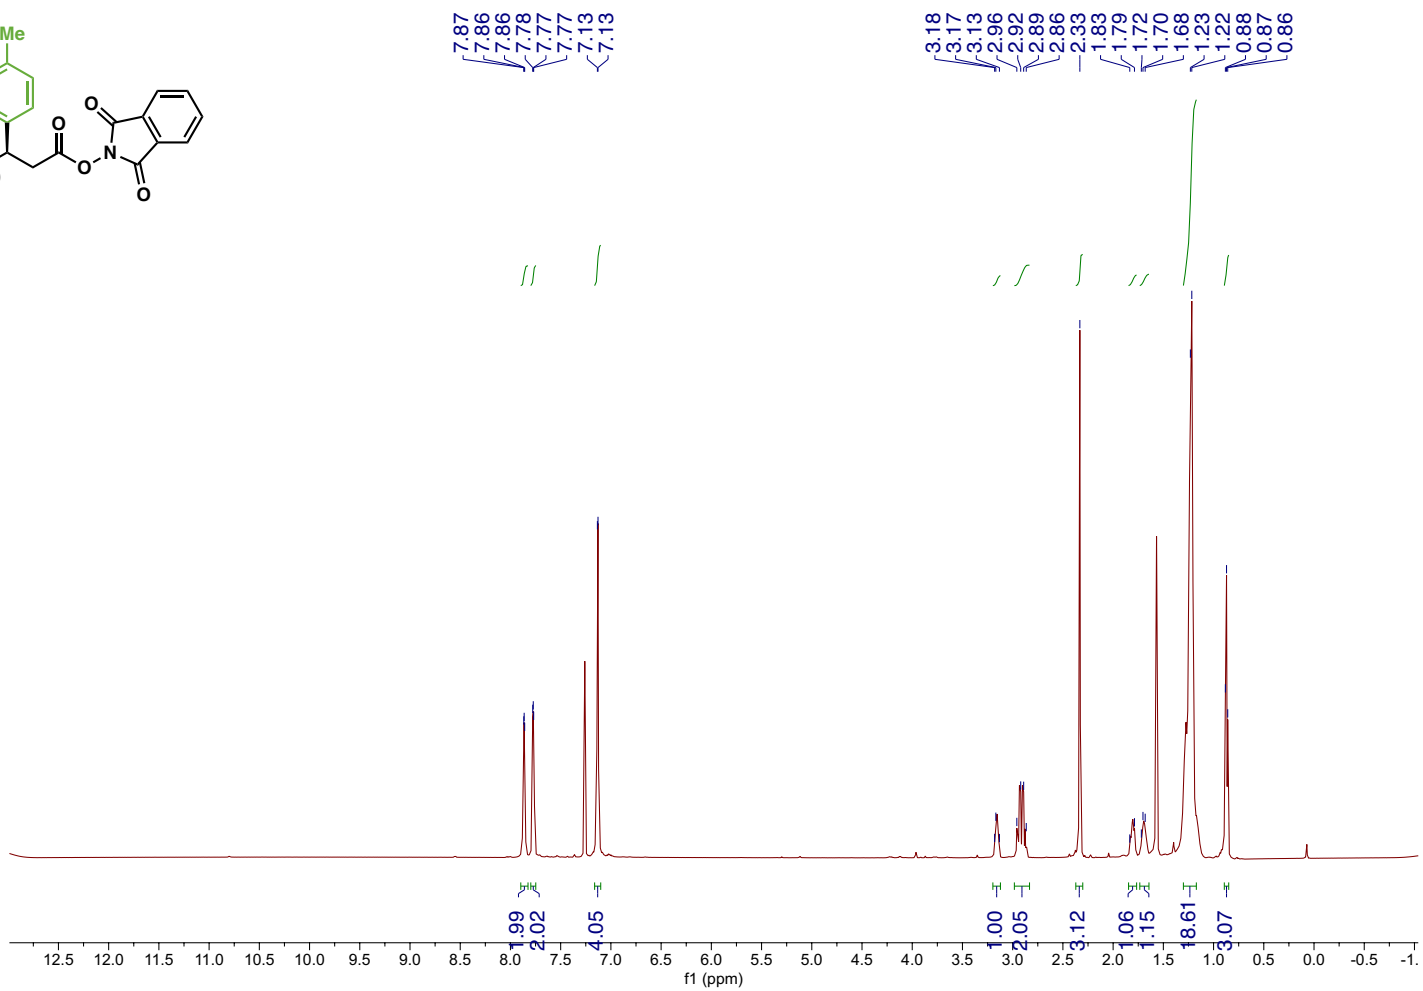



# Compound B4 <sup>13</sup>C NMR

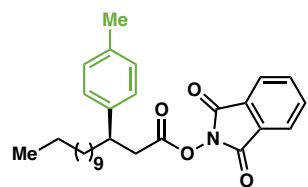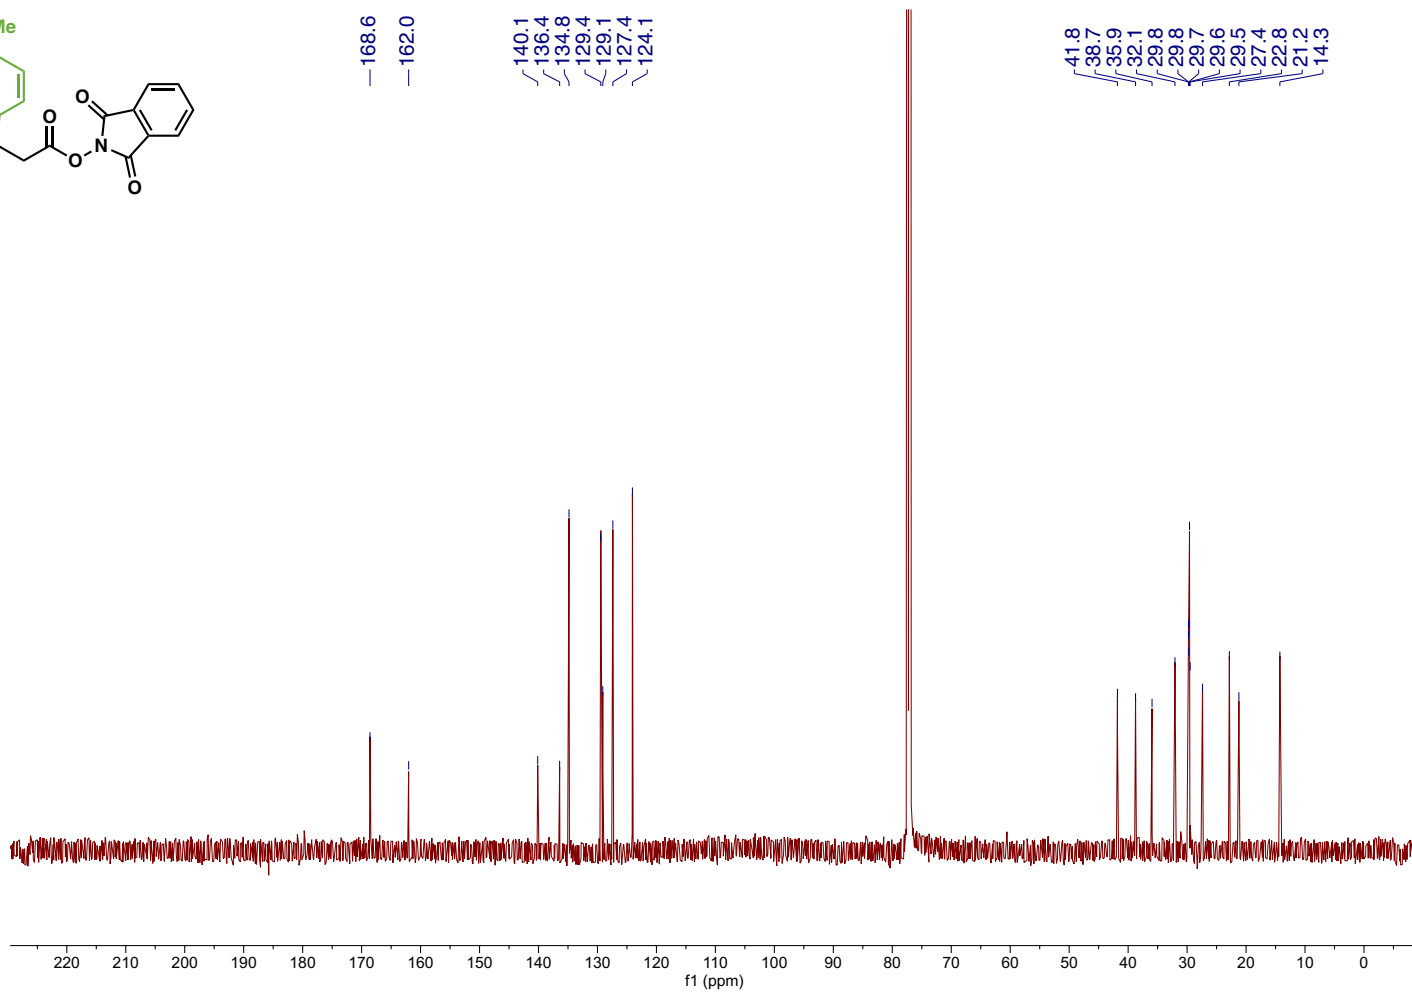

Compound B5 <sup>1</sup>H NMR

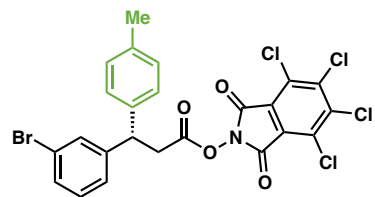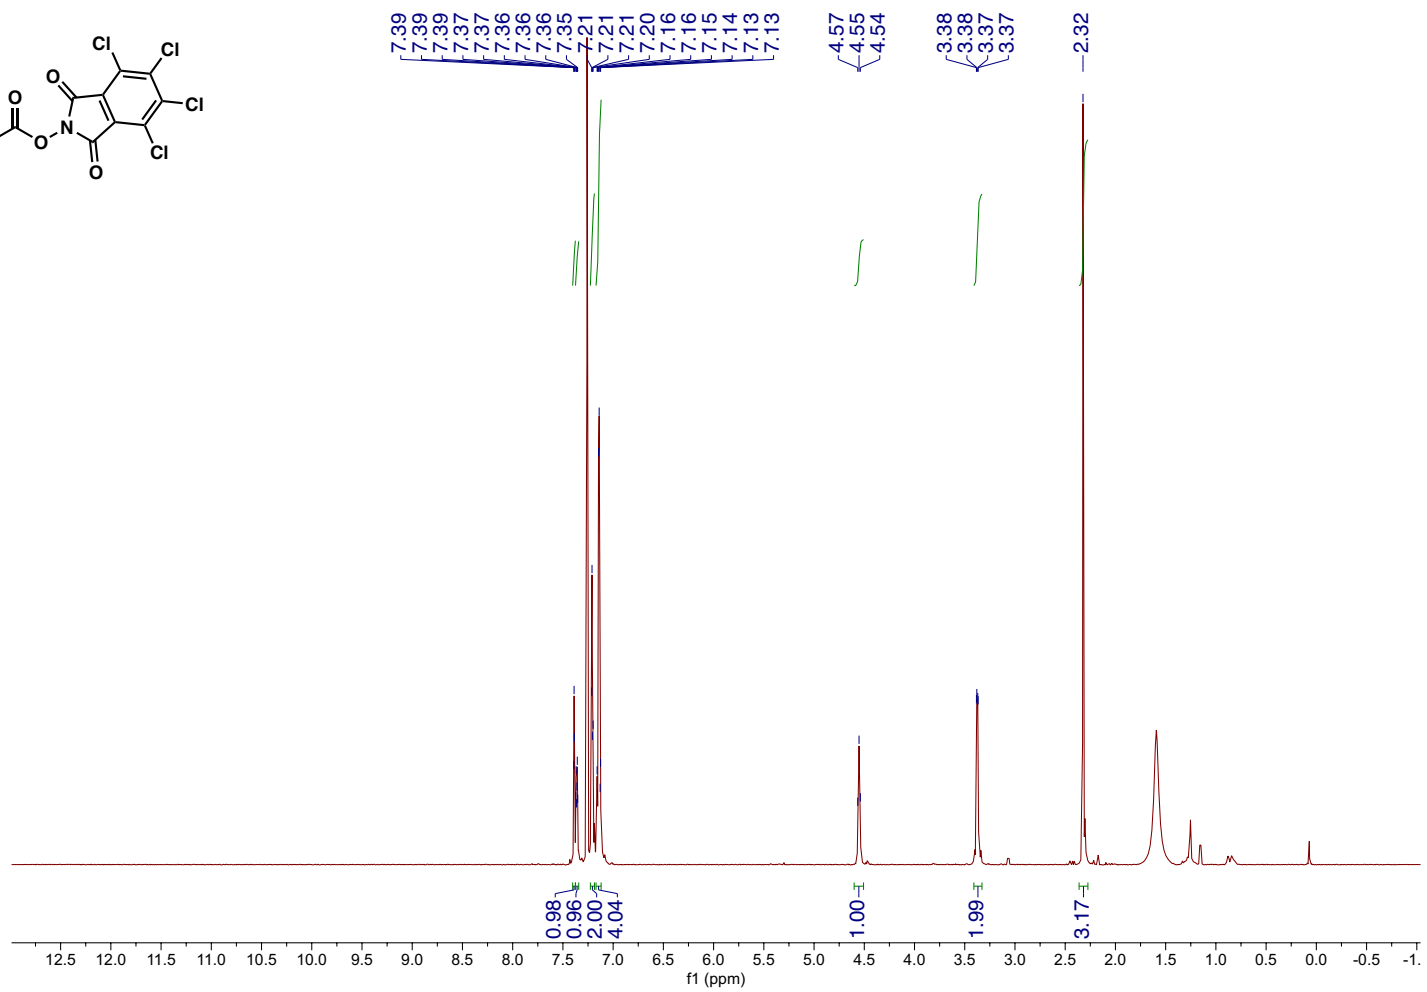

Compound B5 <sup>13</sup>C NMR

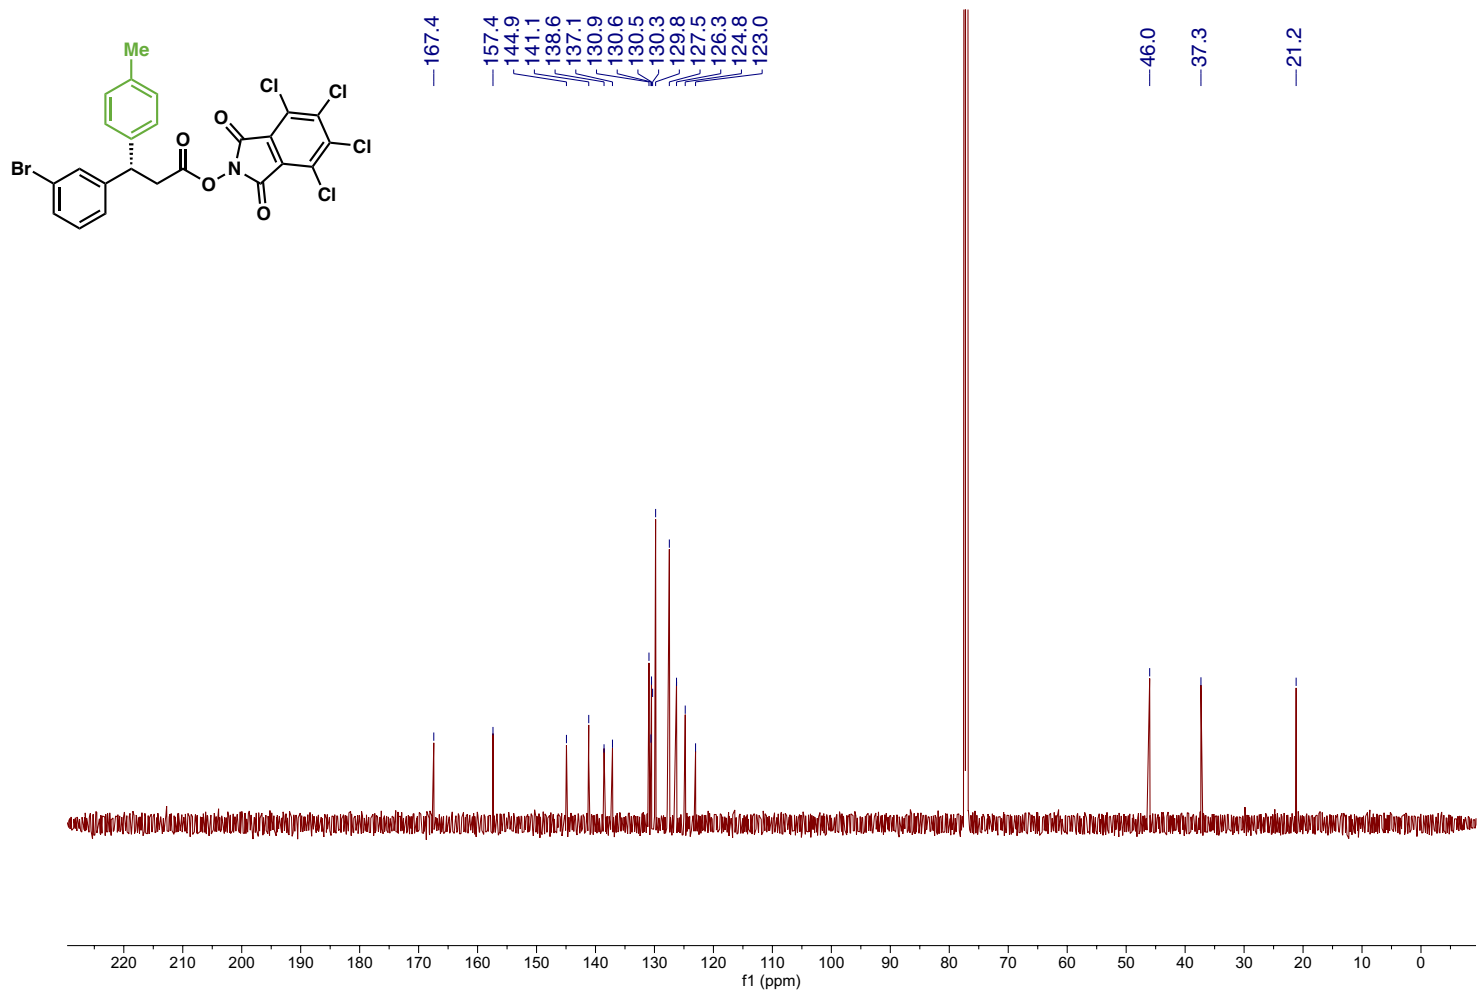

Compound B6 <sup>1</sup>H NMR

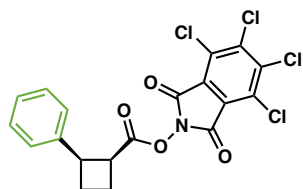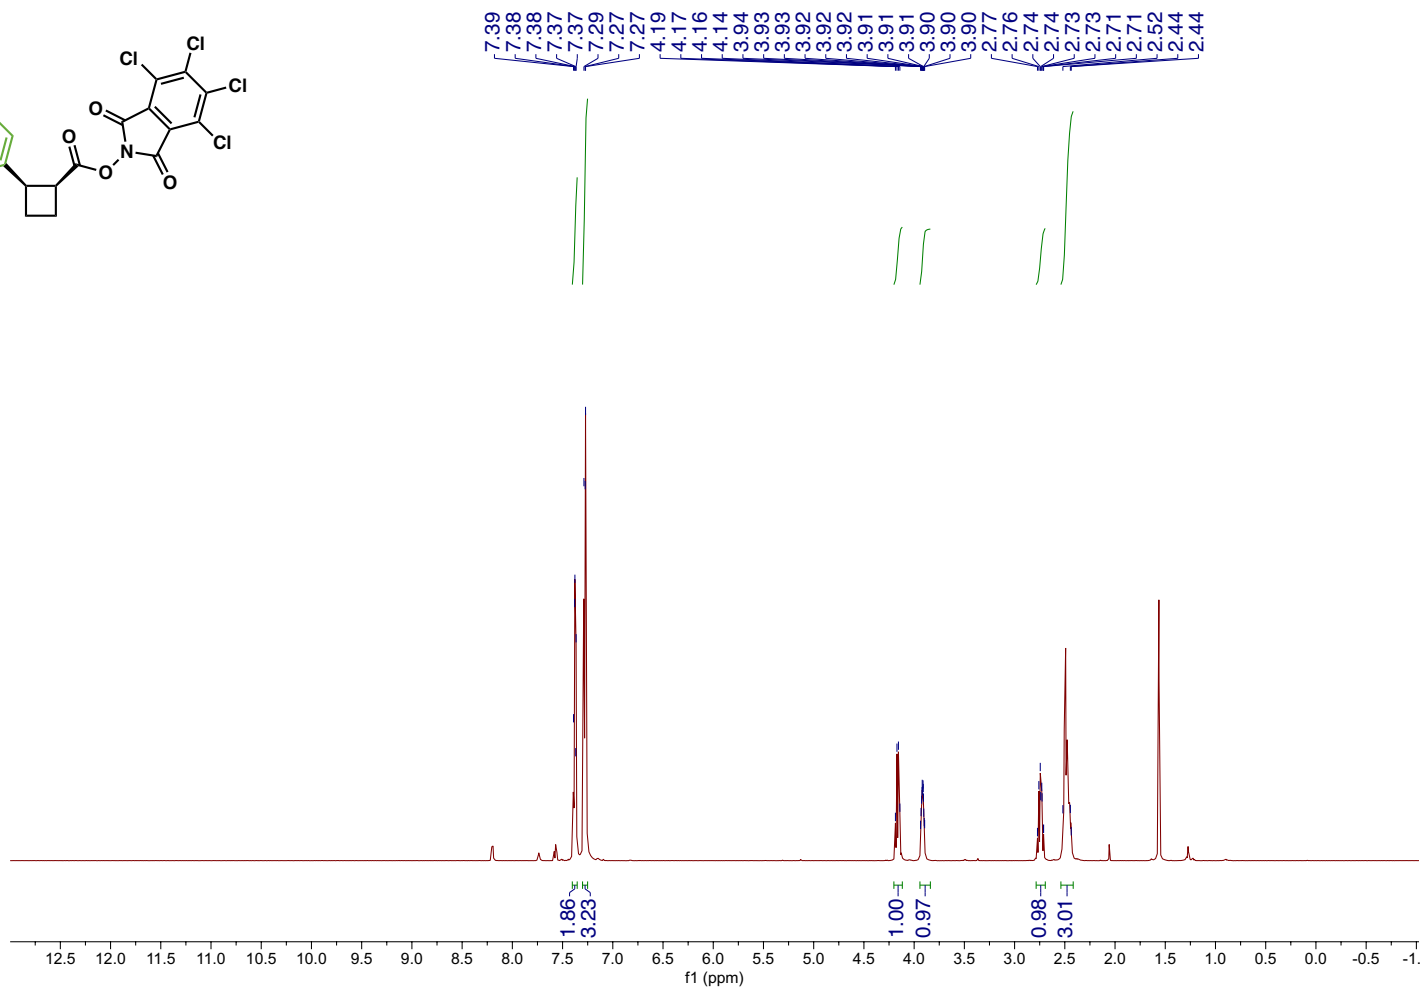

# Compound B6 $^{13}\text{C}$ NMR

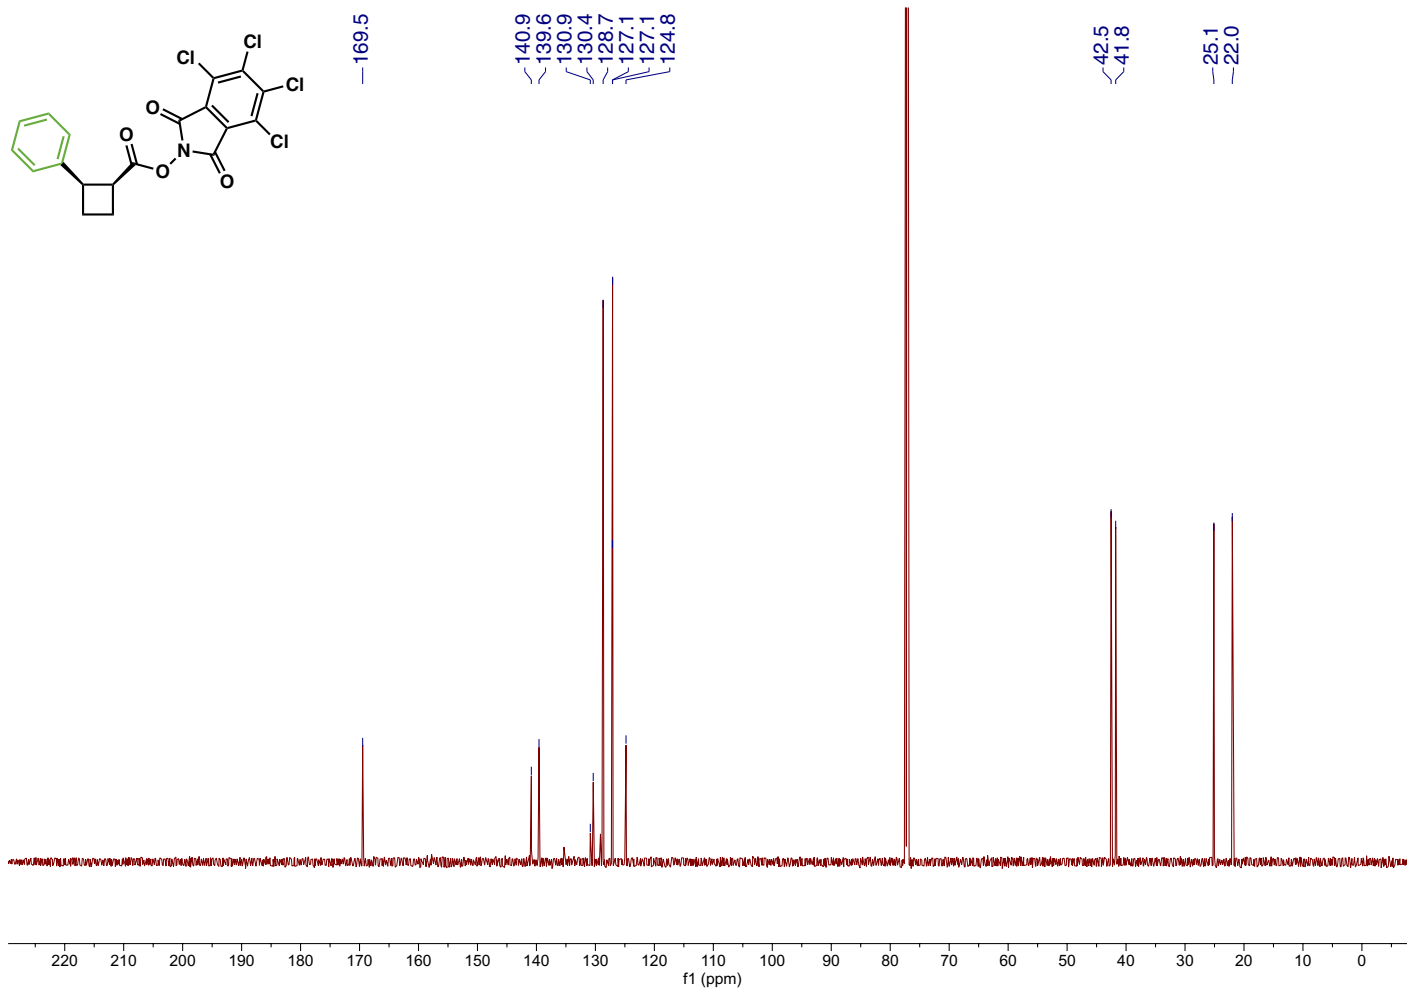

Compound B7 <sup>1</sup>H NMR

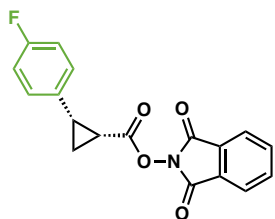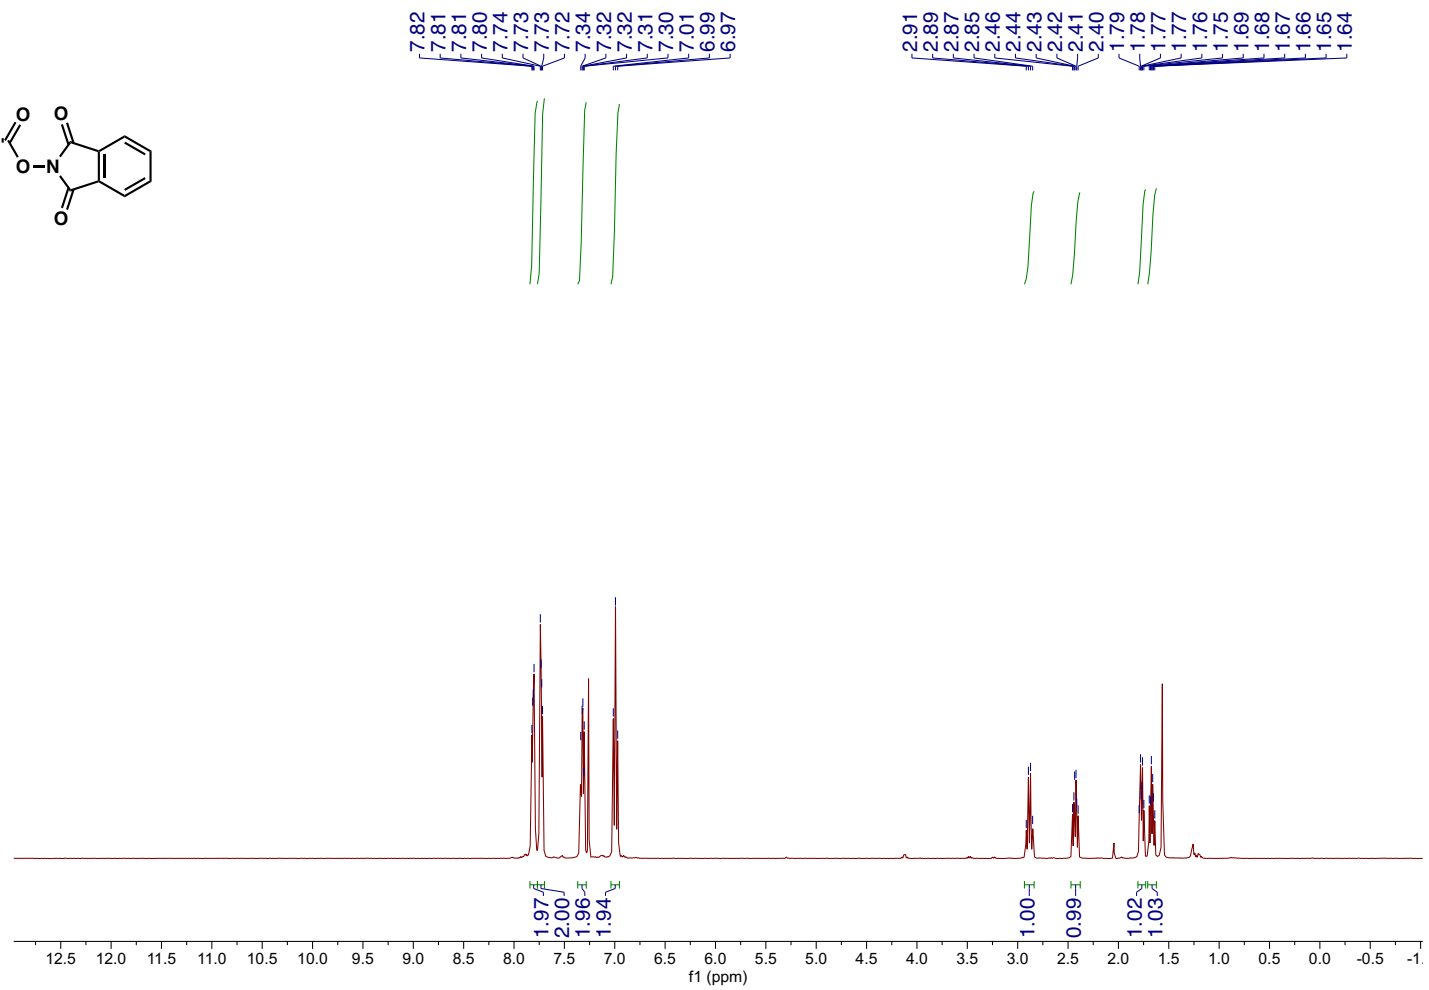

Compound B7  $^{19}\text{F}$  NMR

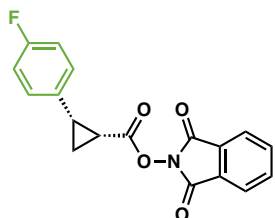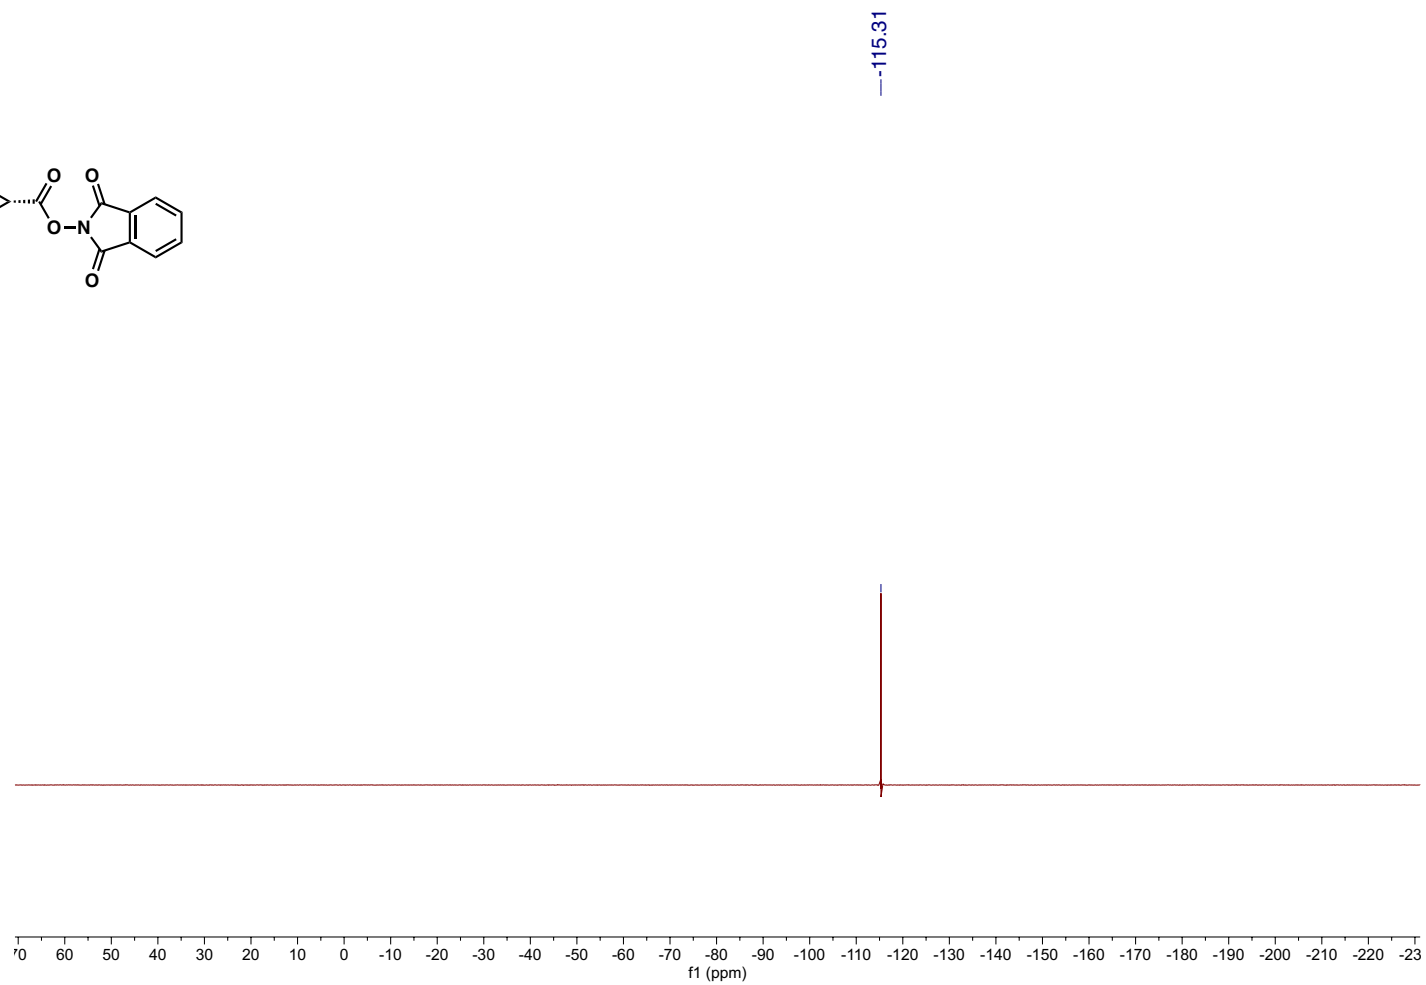

Compound B7 <sup>13</sup>C NMR

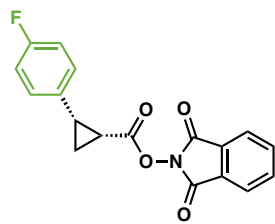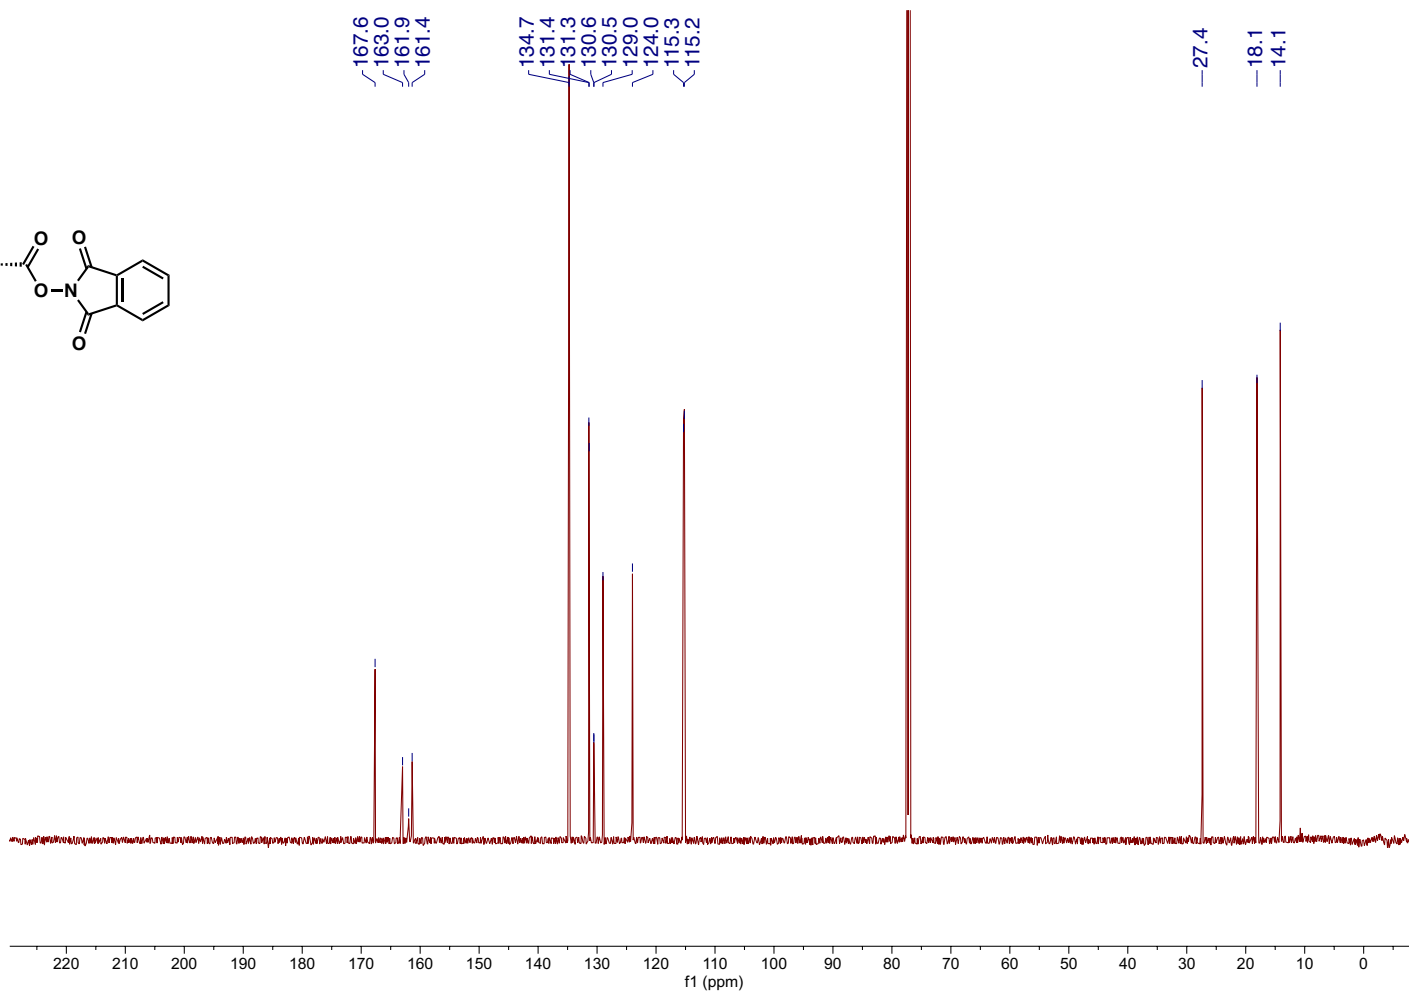



Compound 14  $^1\text{H}$  NMR

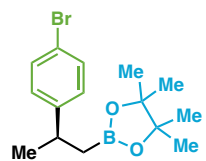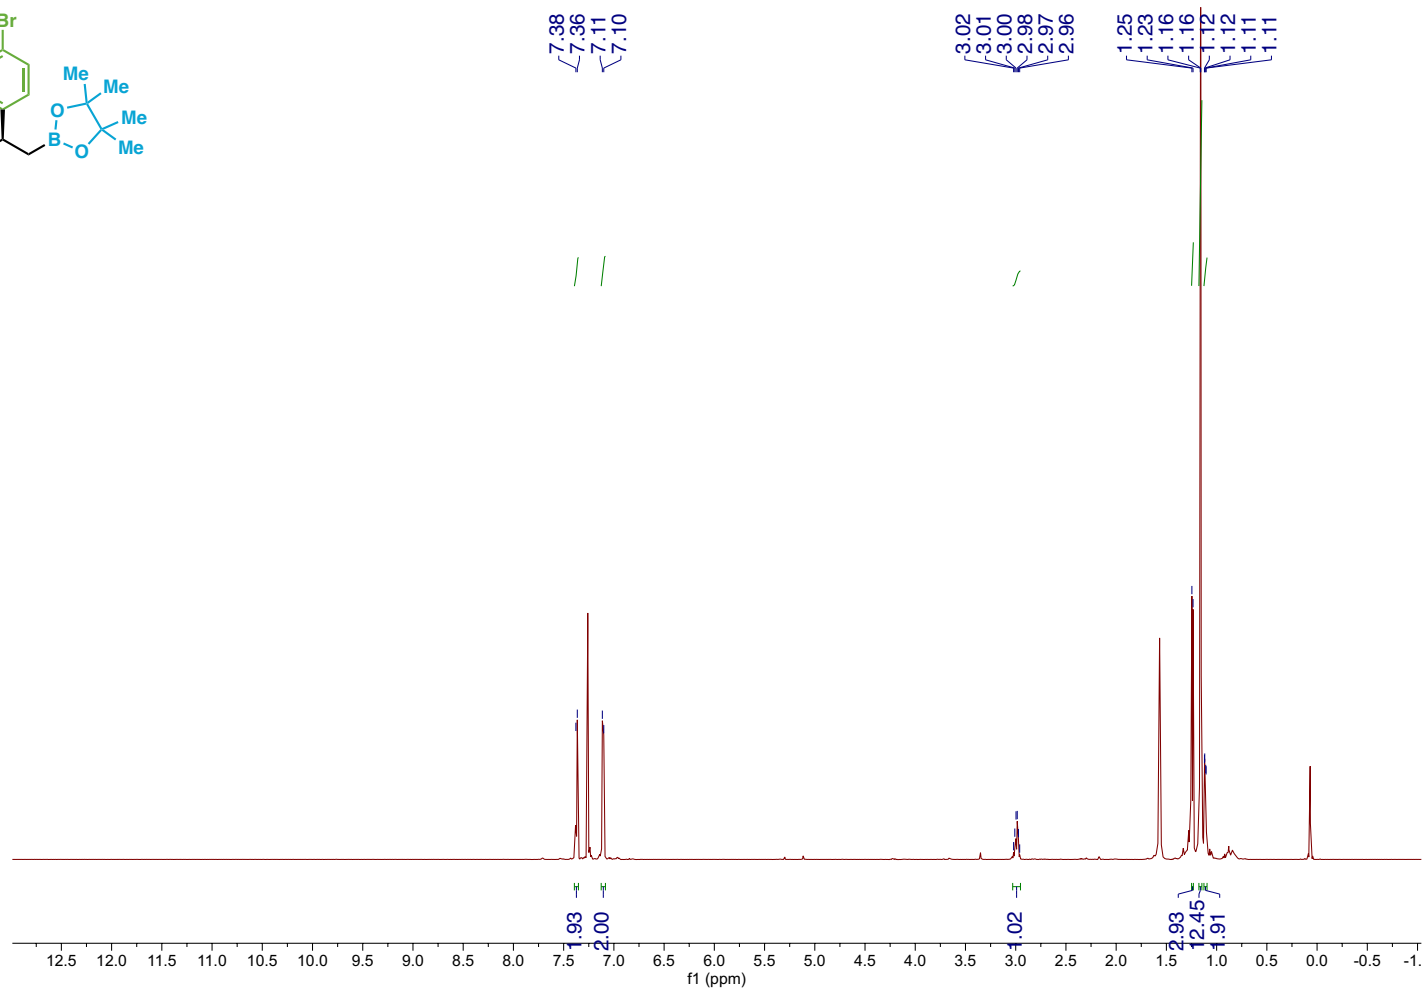

Compound 14  $^{13}\text{C}$  NMR

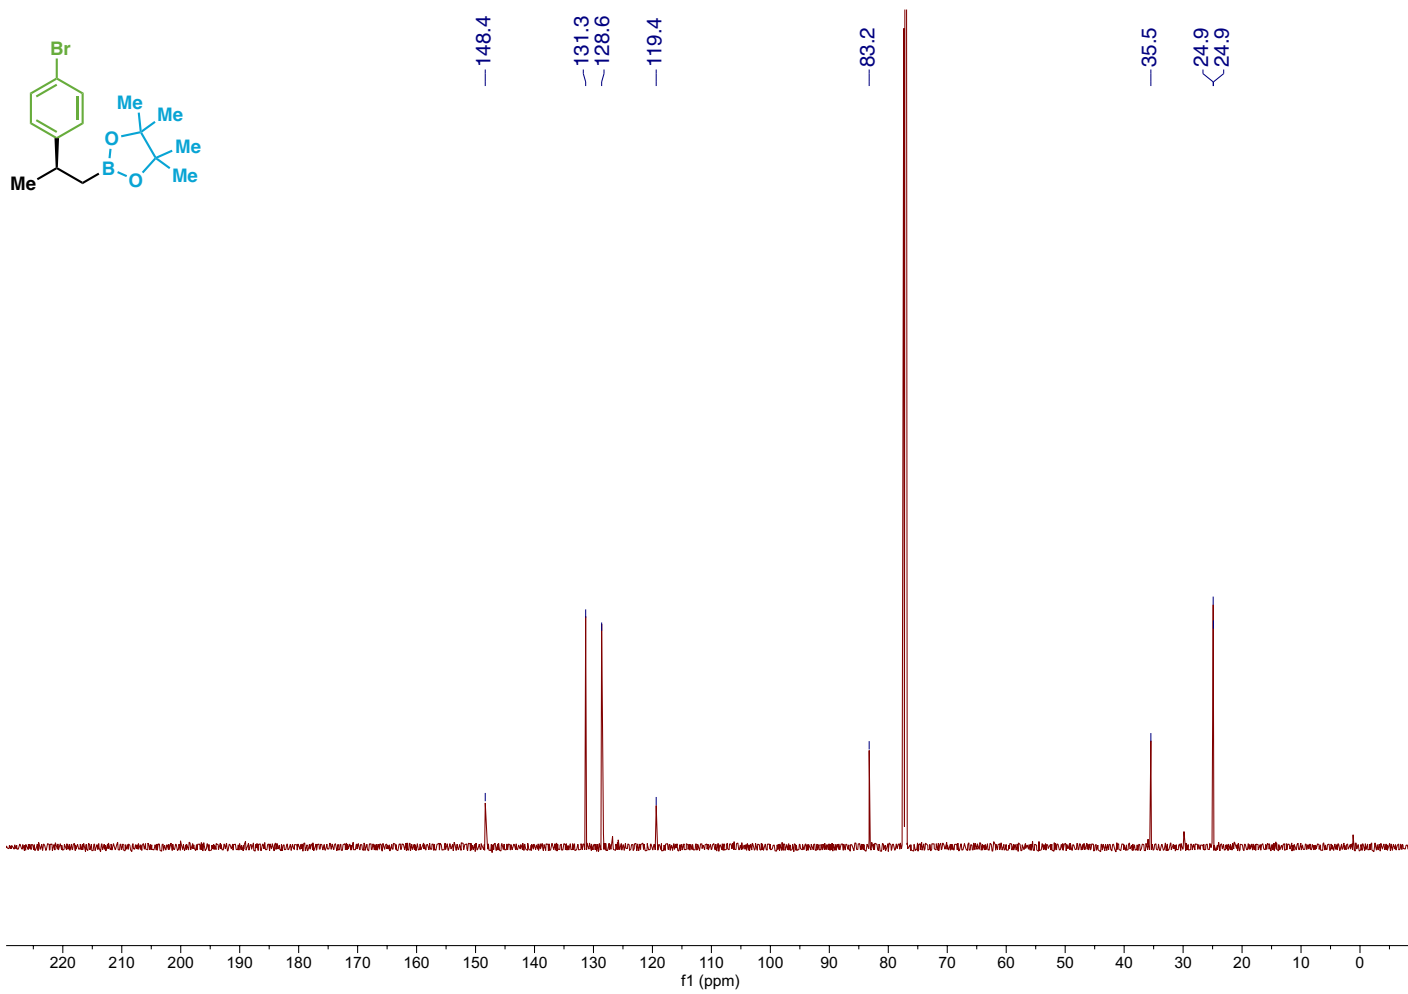

Compound 15  $^1\text{H}$  NMR

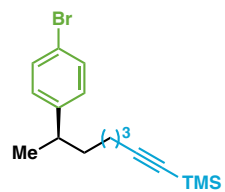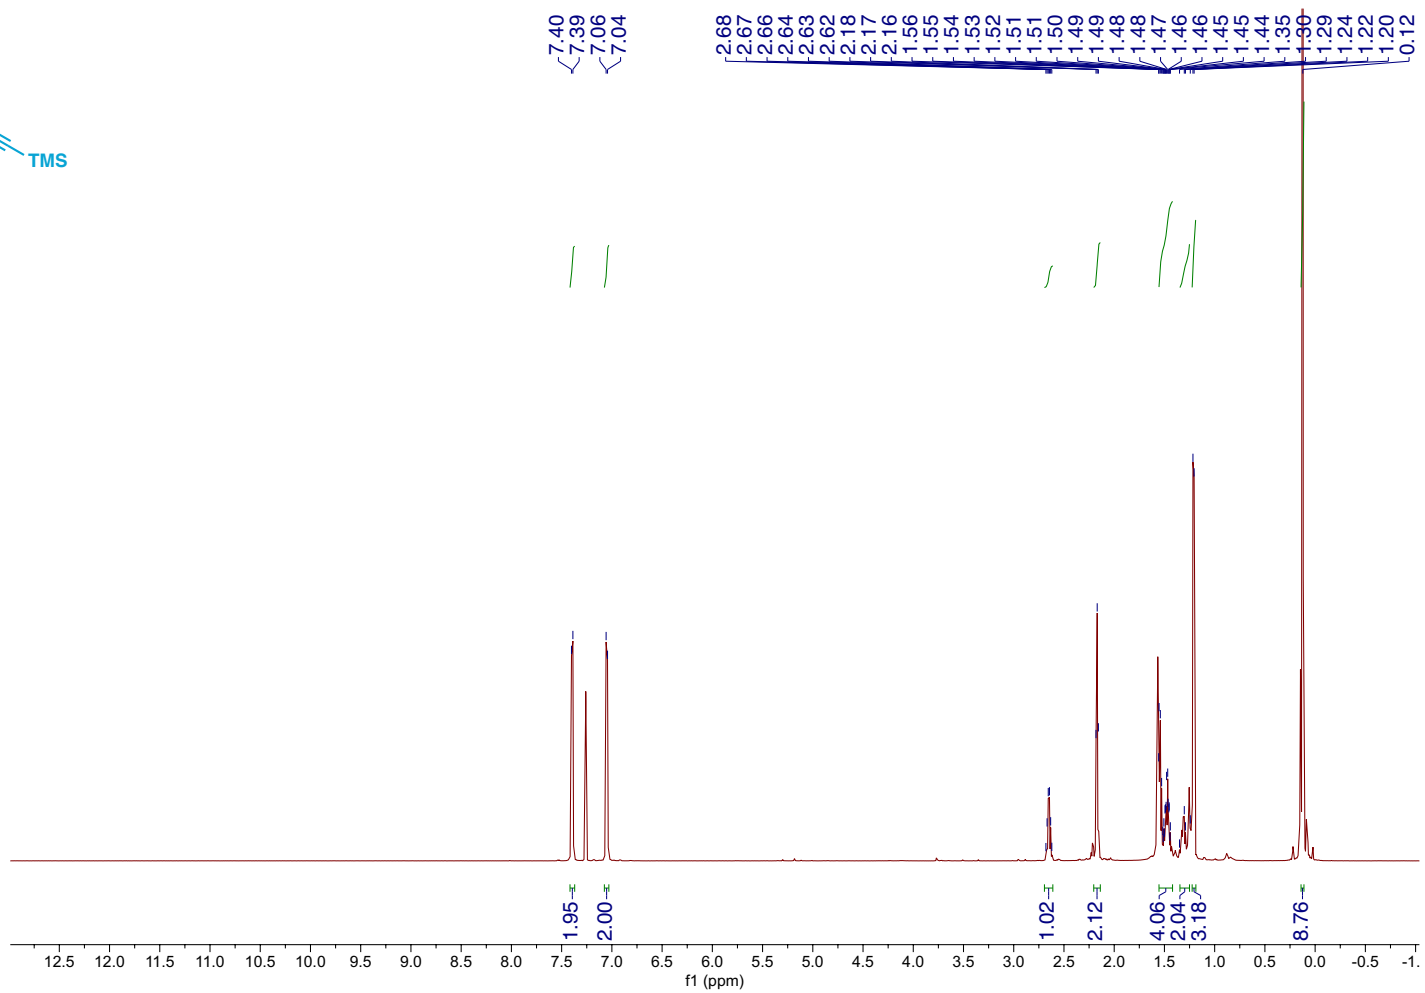

# Compound 15 <sup>13</sup>C NMR

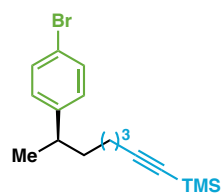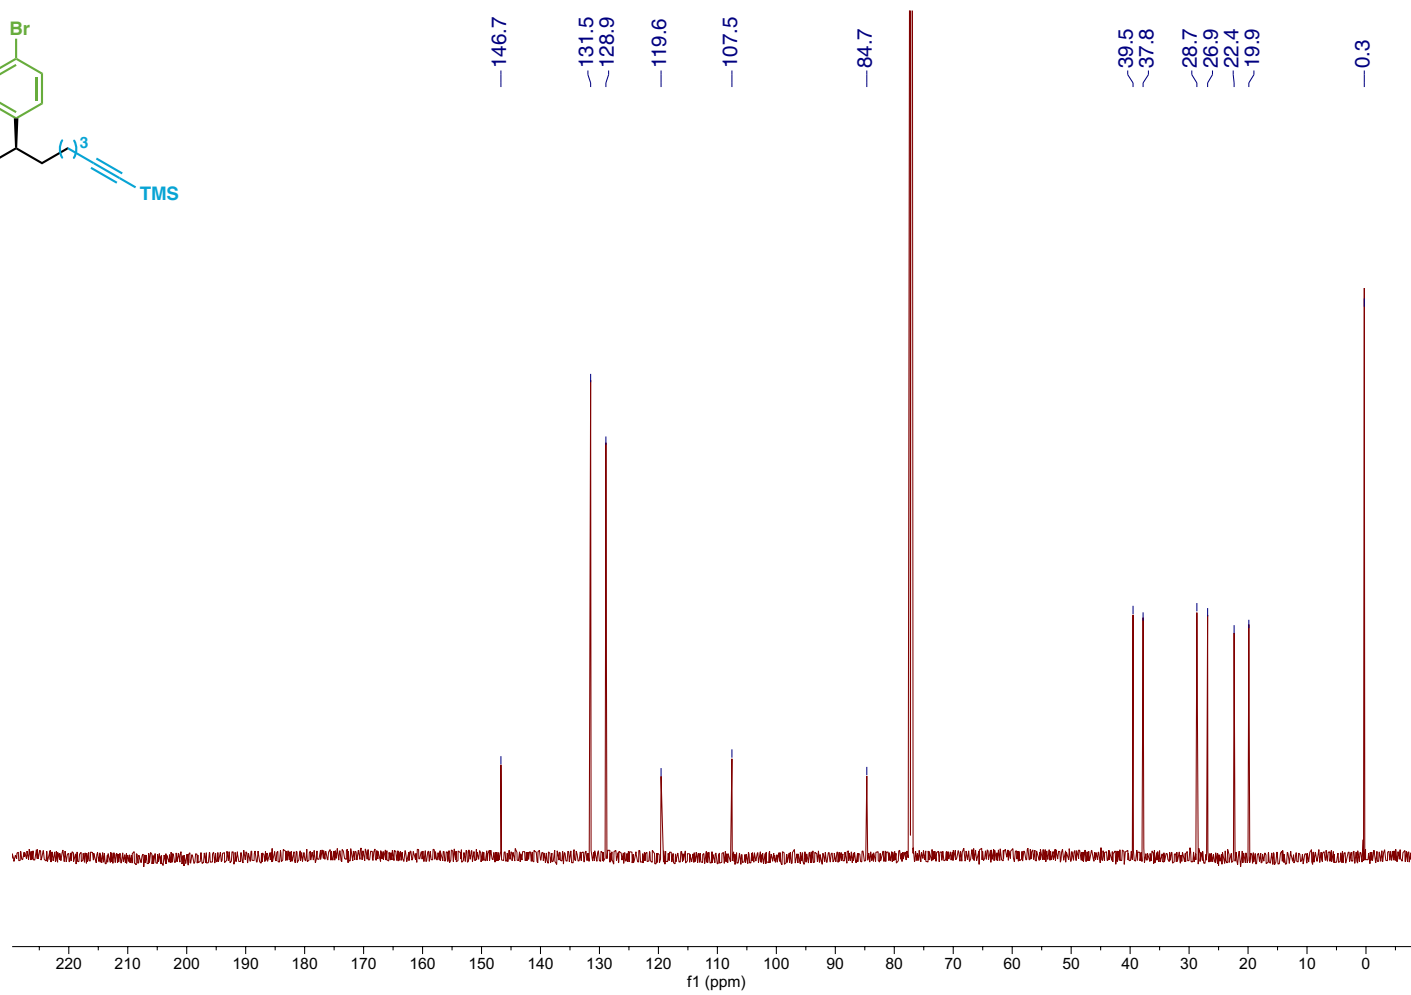

Compound 16  $^1\text{H}$  NMR

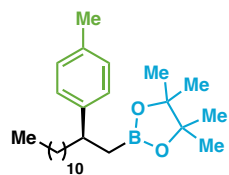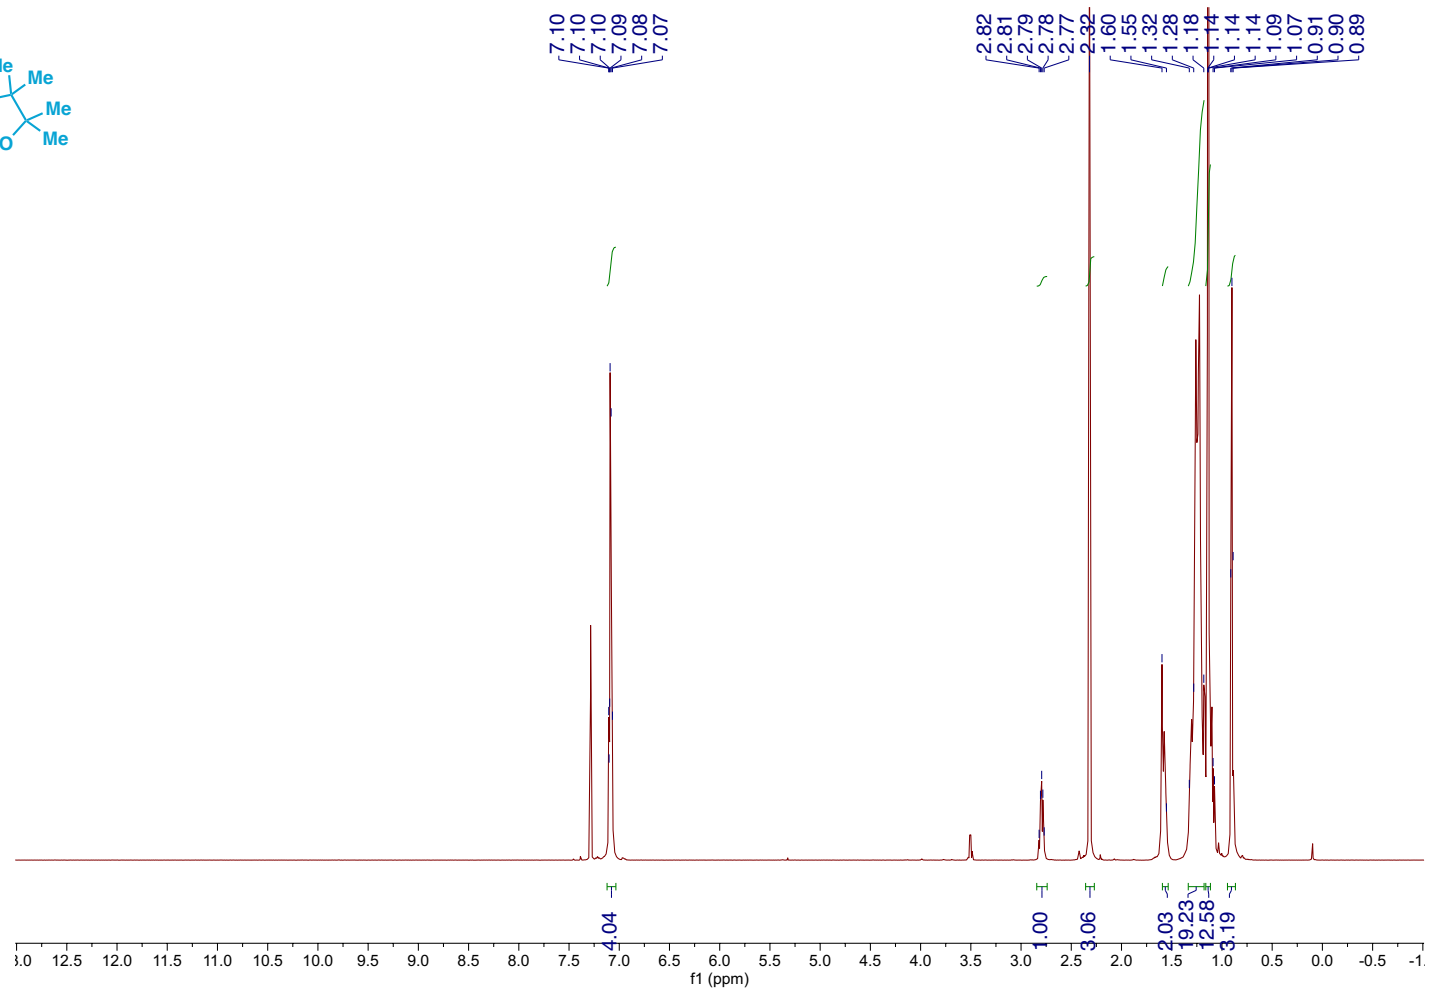

# Compound 16 <sup>13</sup>C NMR

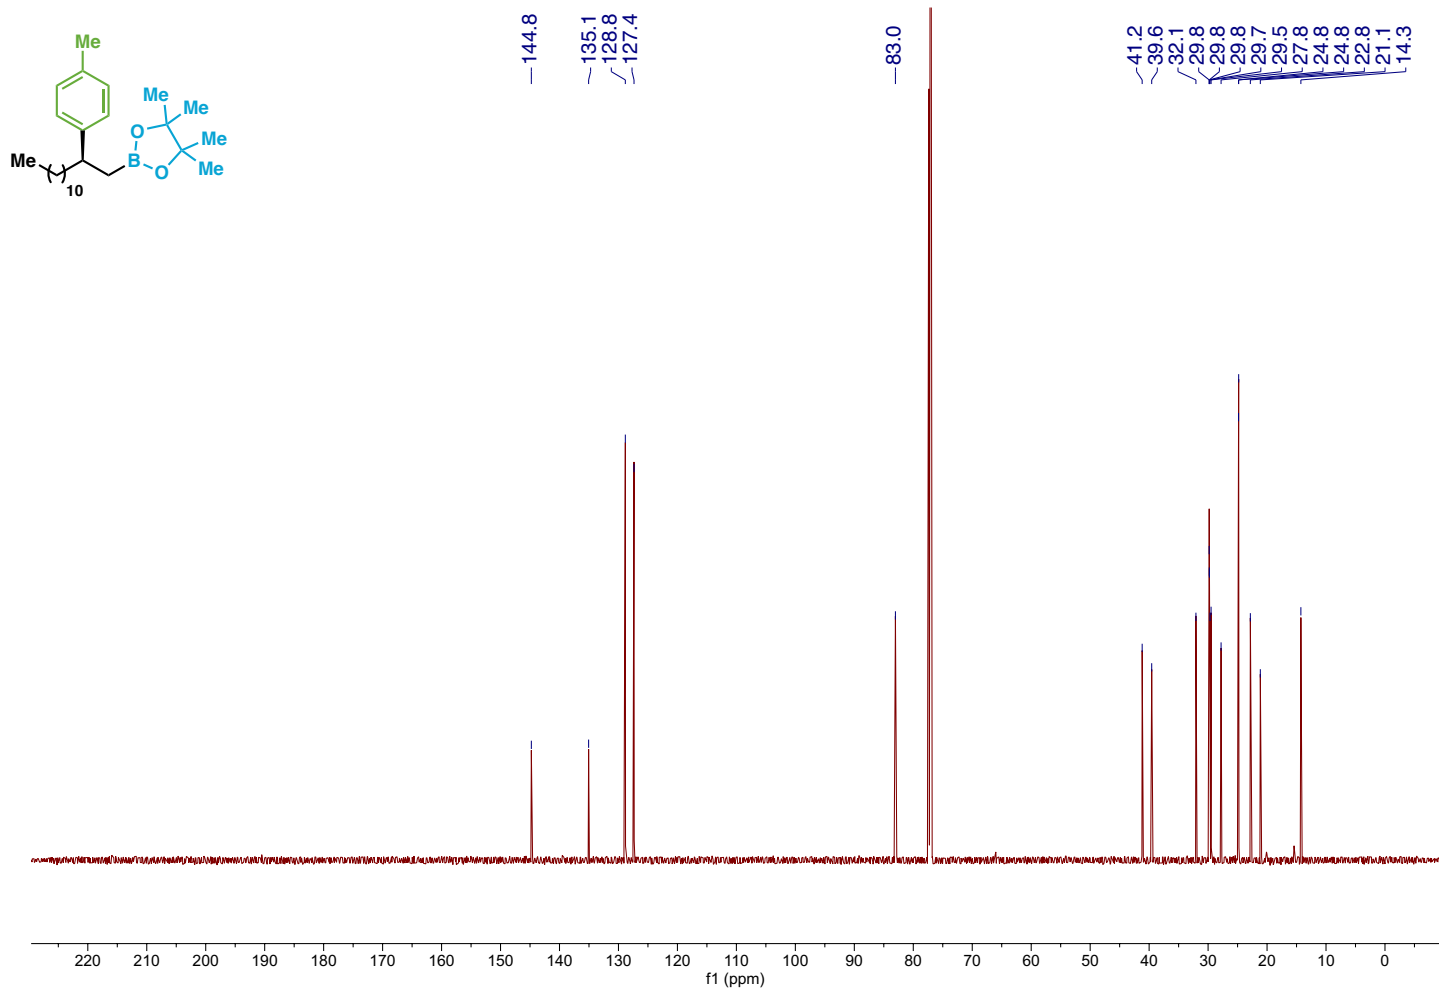

Compound 17 <sup>1</sup>H NMR

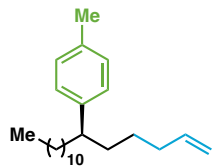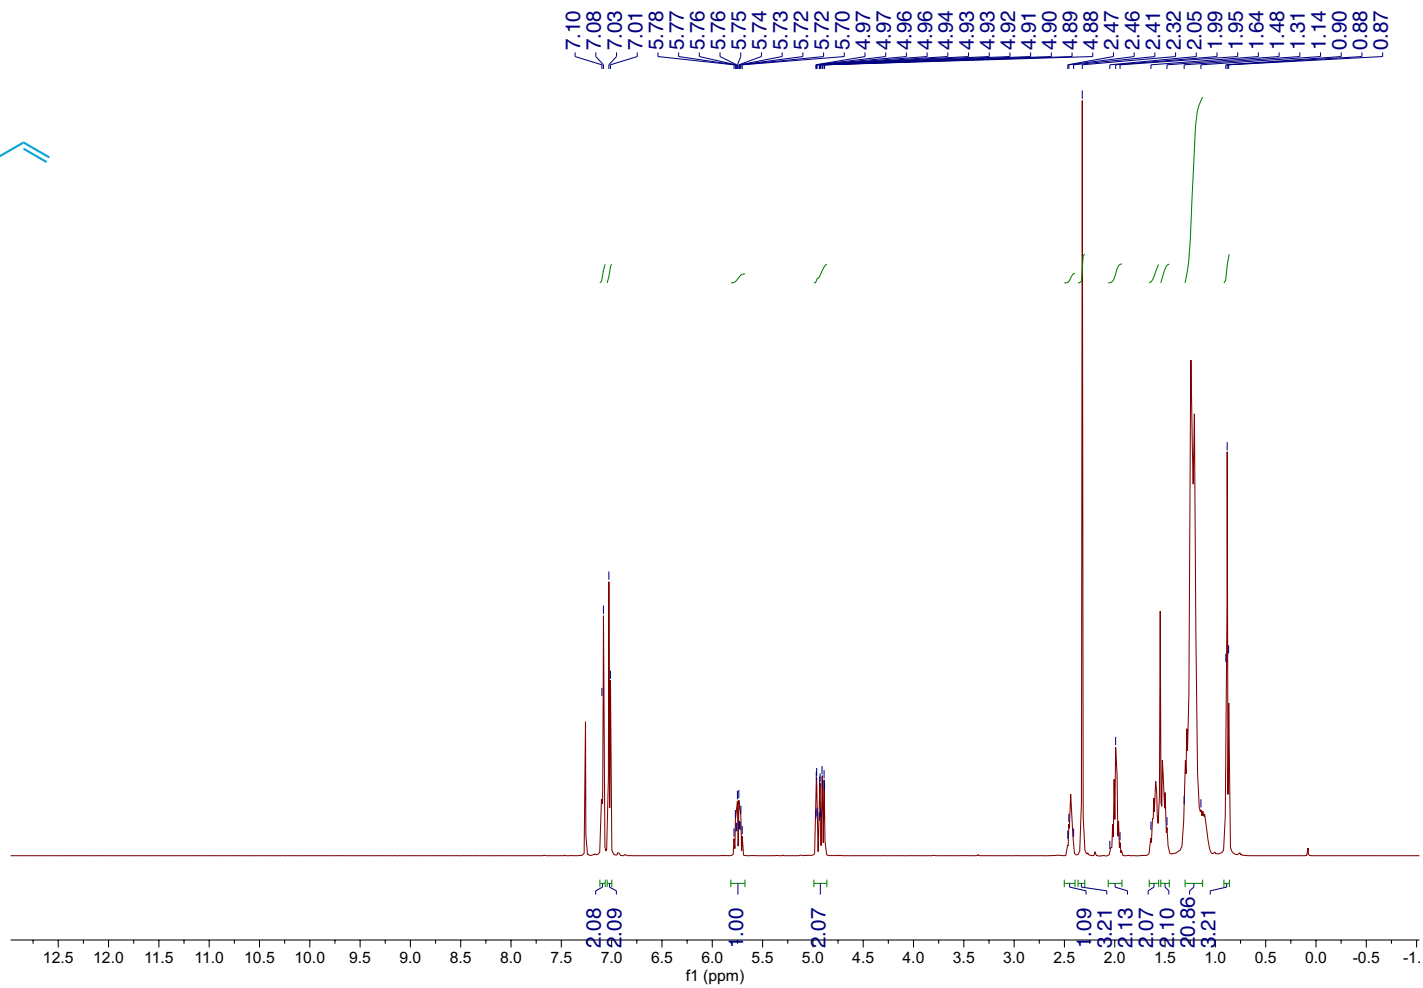

# Compound 17 <sup>13</sup>C NMR

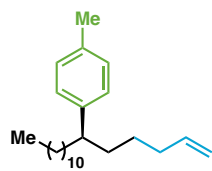

143.3  
139.2  
135.2  
129.0  
127.7  
114.4

45.6  
37.1  
36.6  
34.0  
32.1  
29.9  
29.8  
29.7  
29.5  
27.8  
27.1  
22.8  
21.2  
14.3

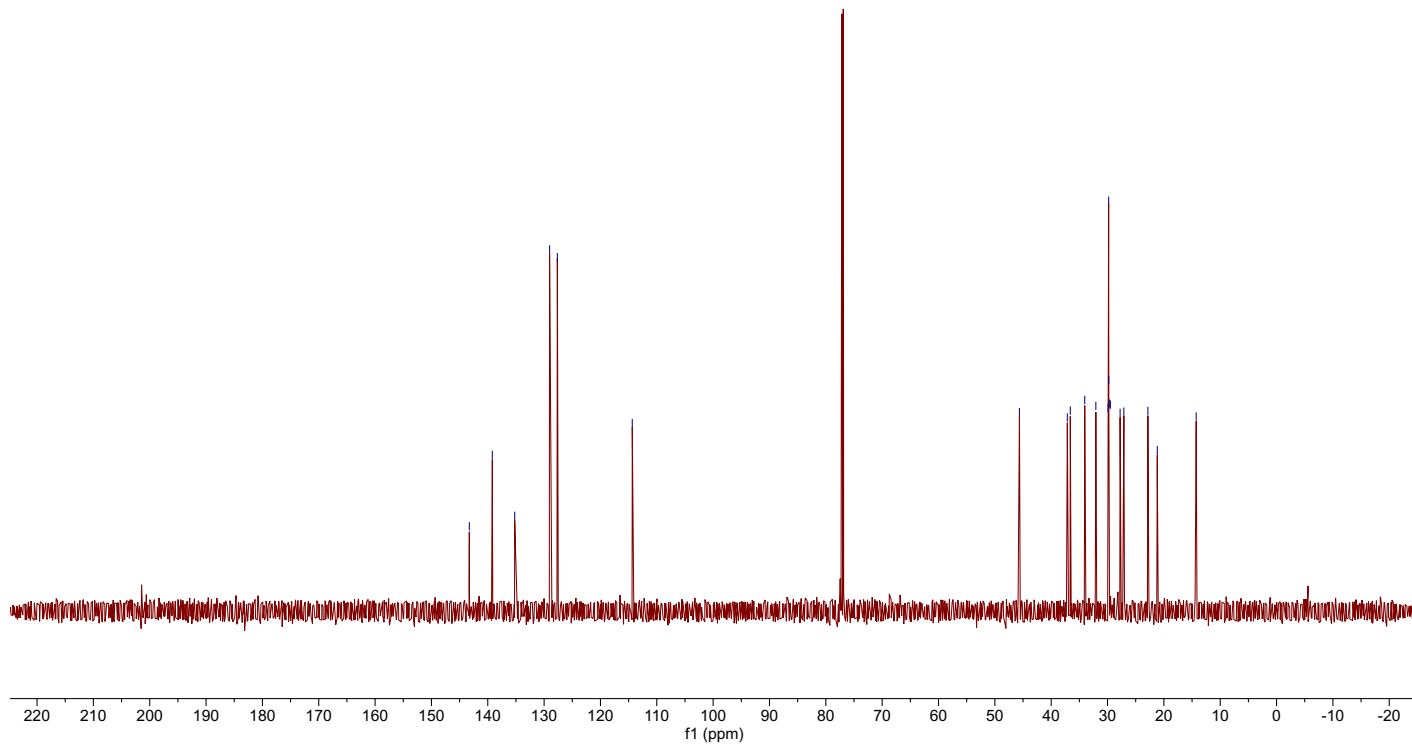



# Compound 18 <sup>1</sup>H NMR

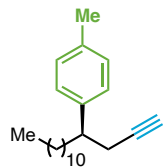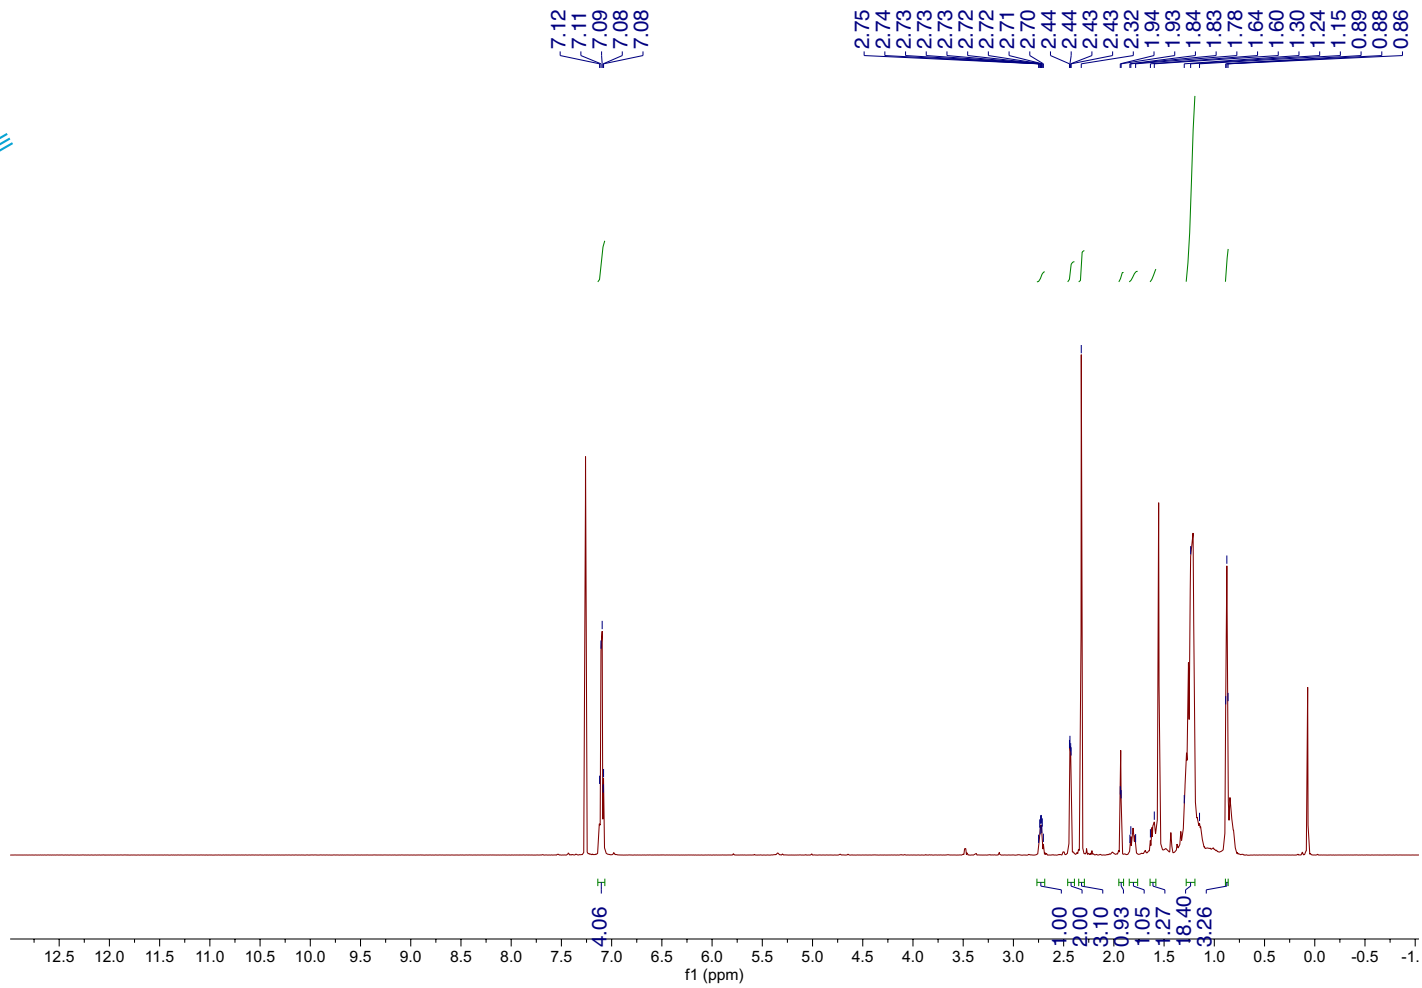

# Compound 18 <sup>13</sup>C NMR

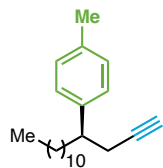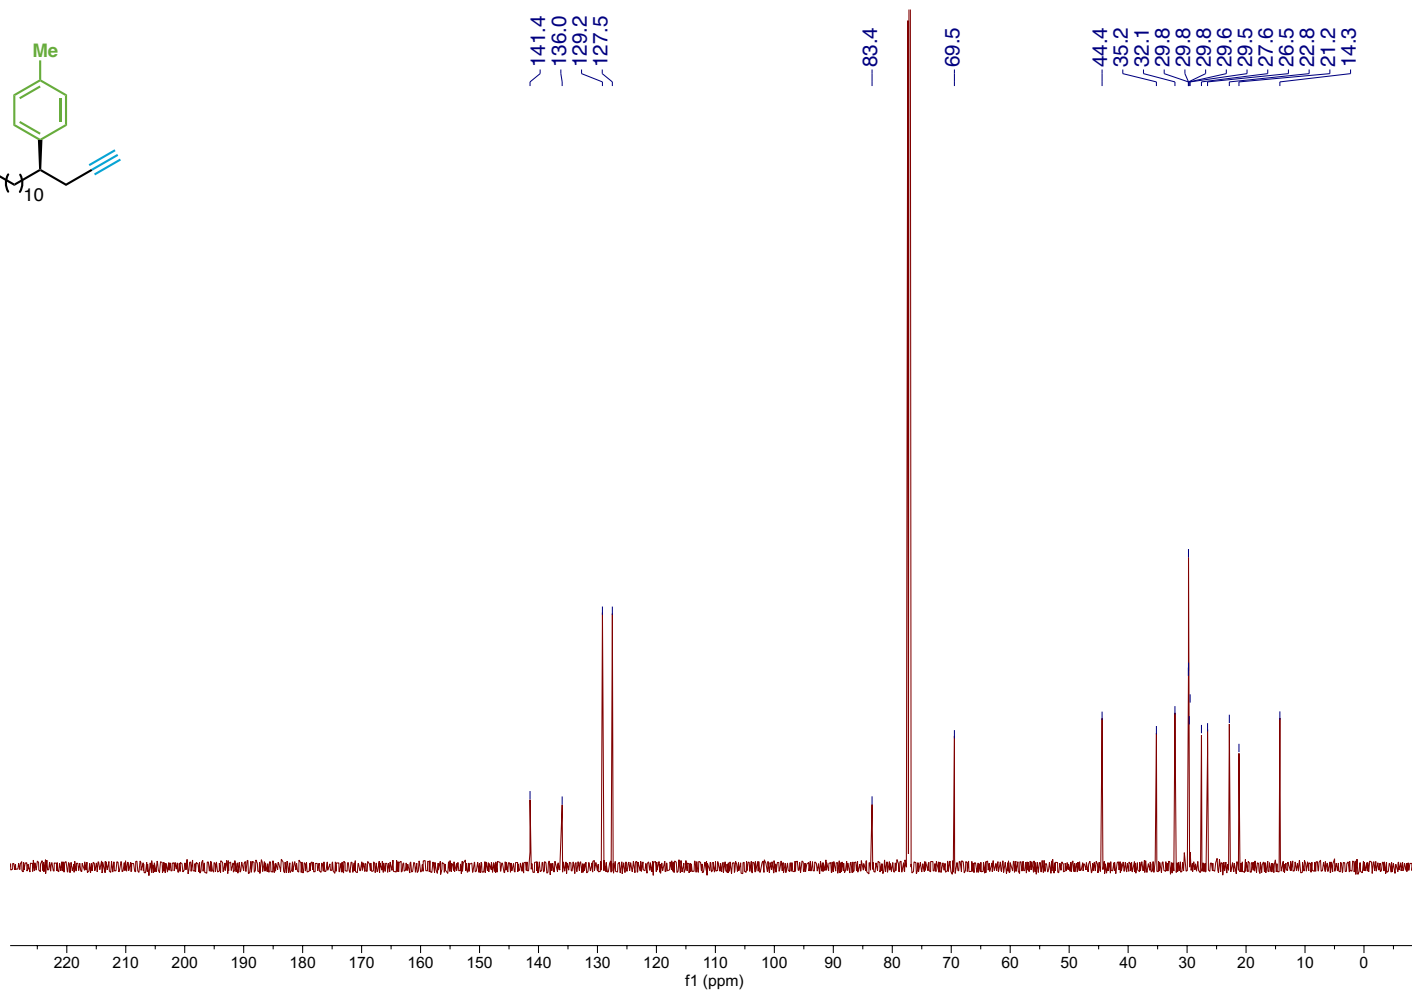

# Compound 19 <sup>1</sup>H NMR

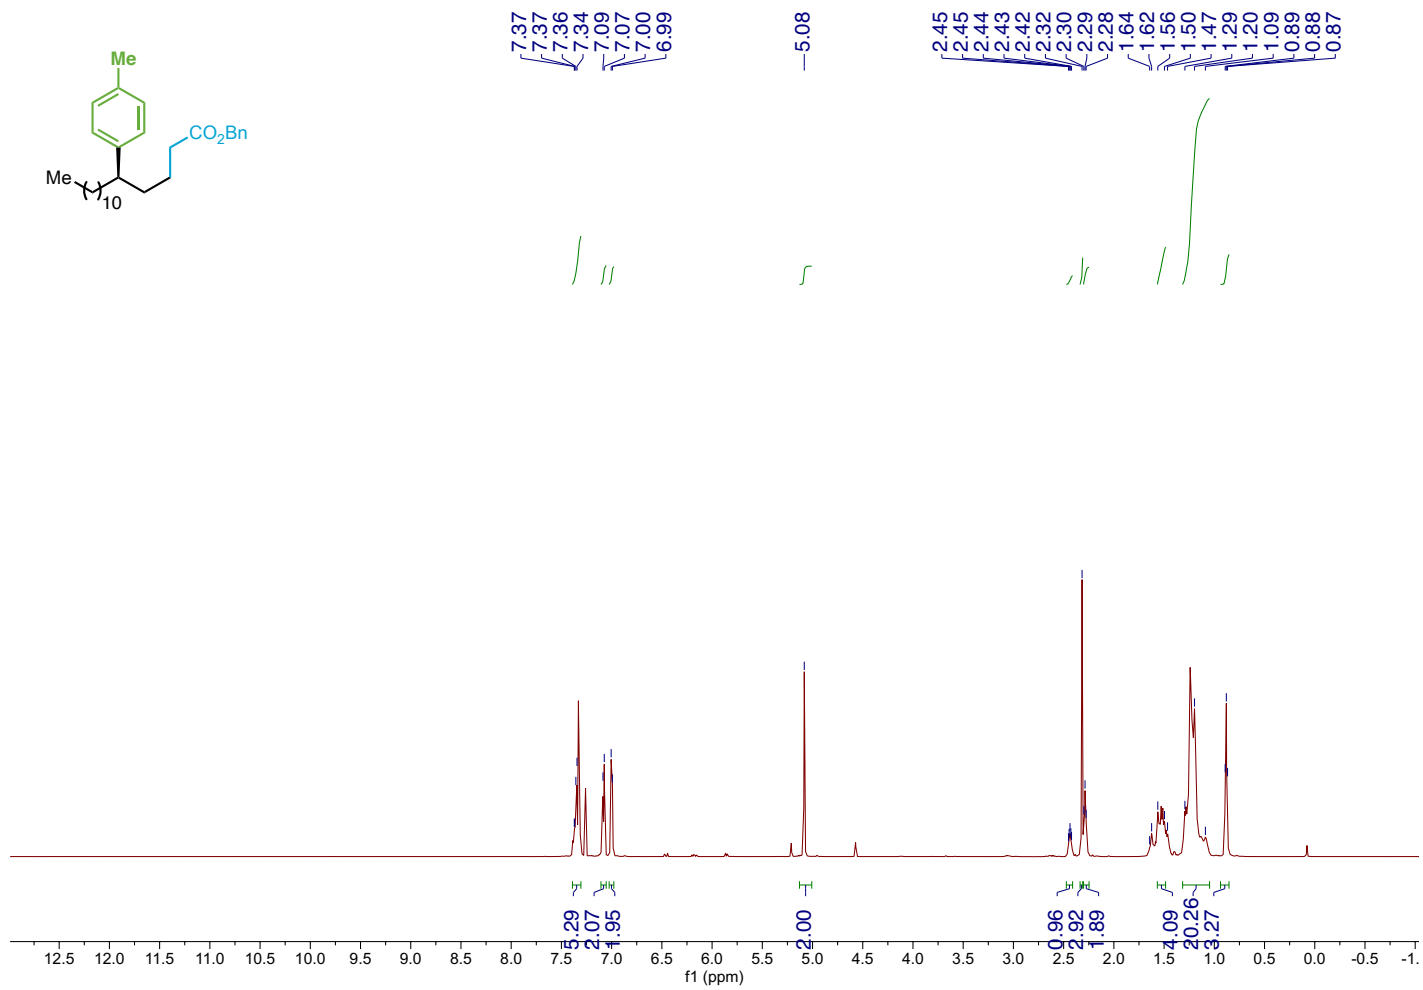

# Compound 19 <sup>13</sup>C NMR

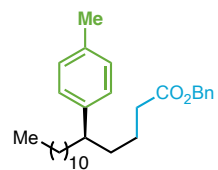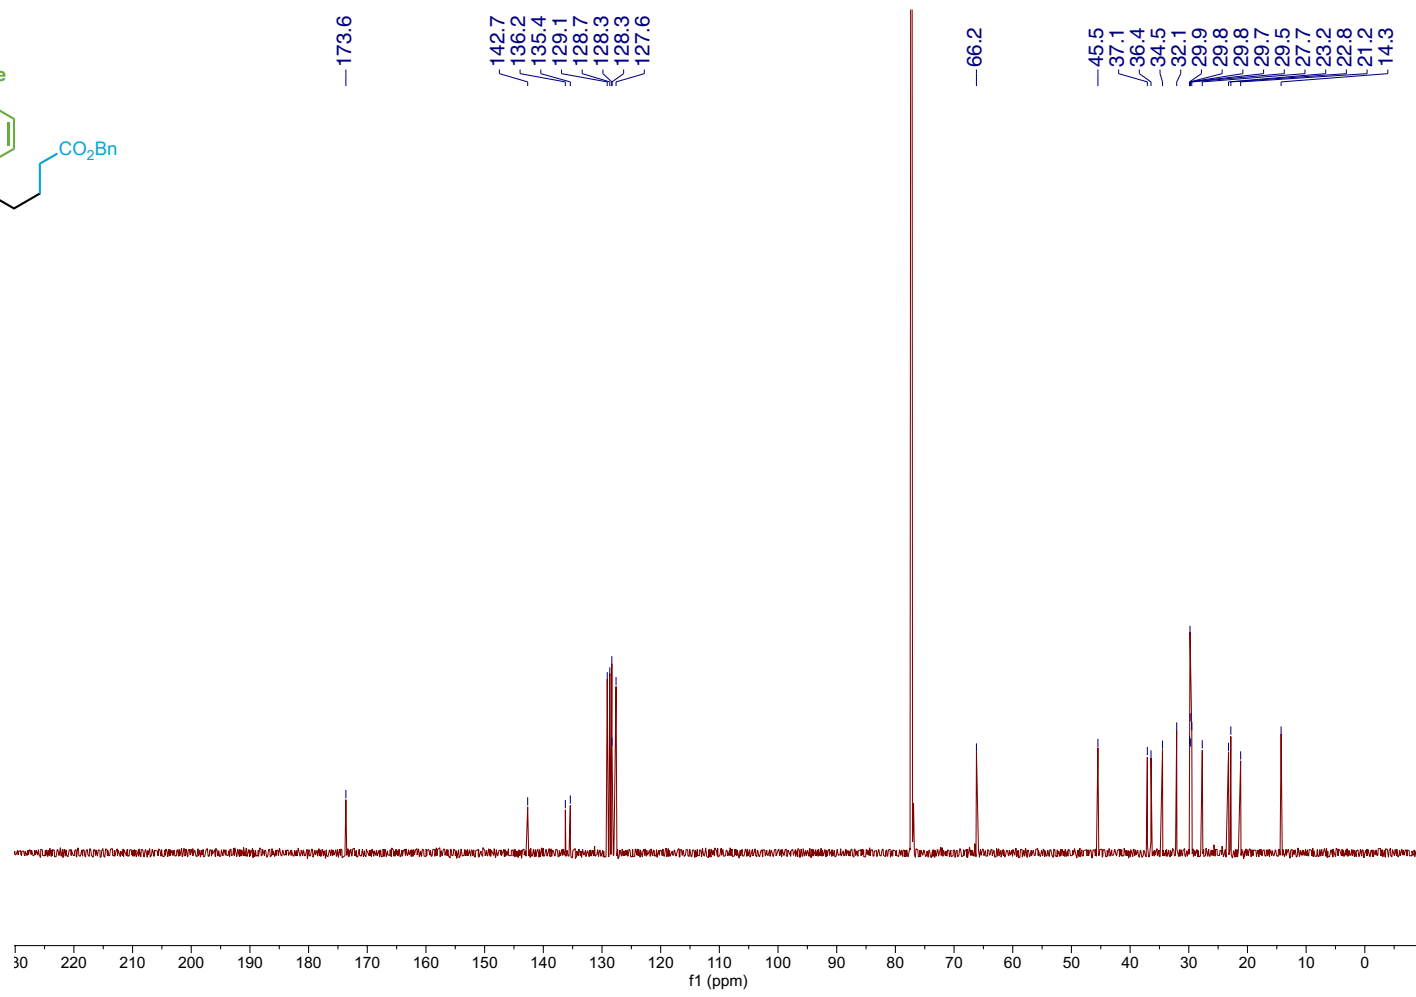

# Compound 20 <sup>1</sup>H NMR

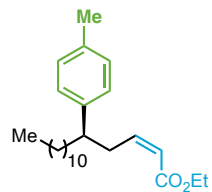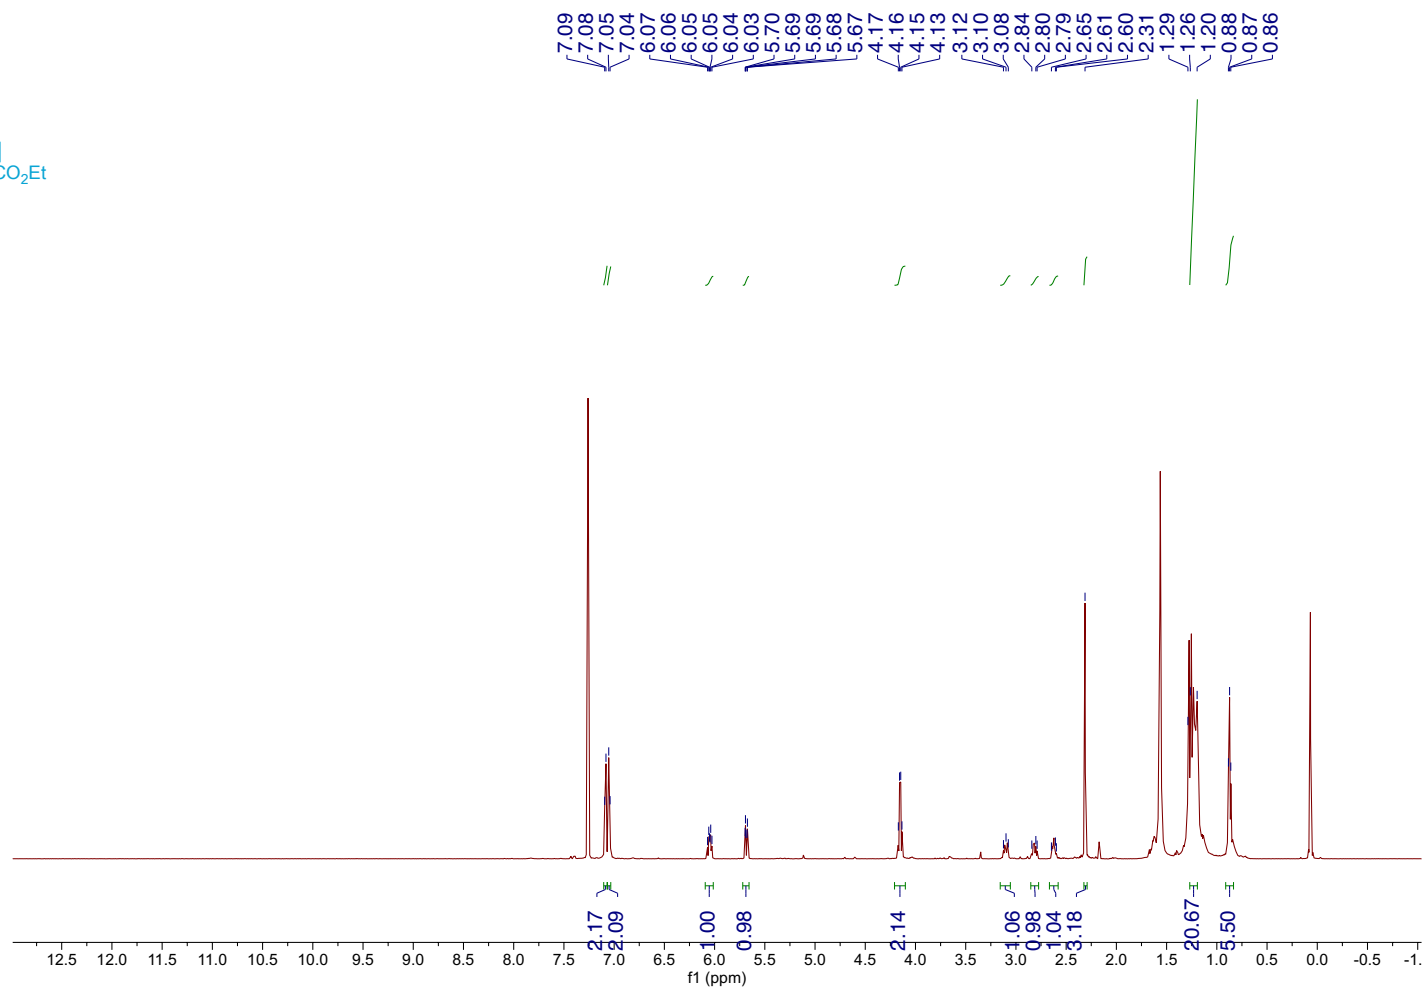

# Compound 20 <sup>13</sup>C NMR

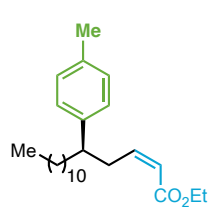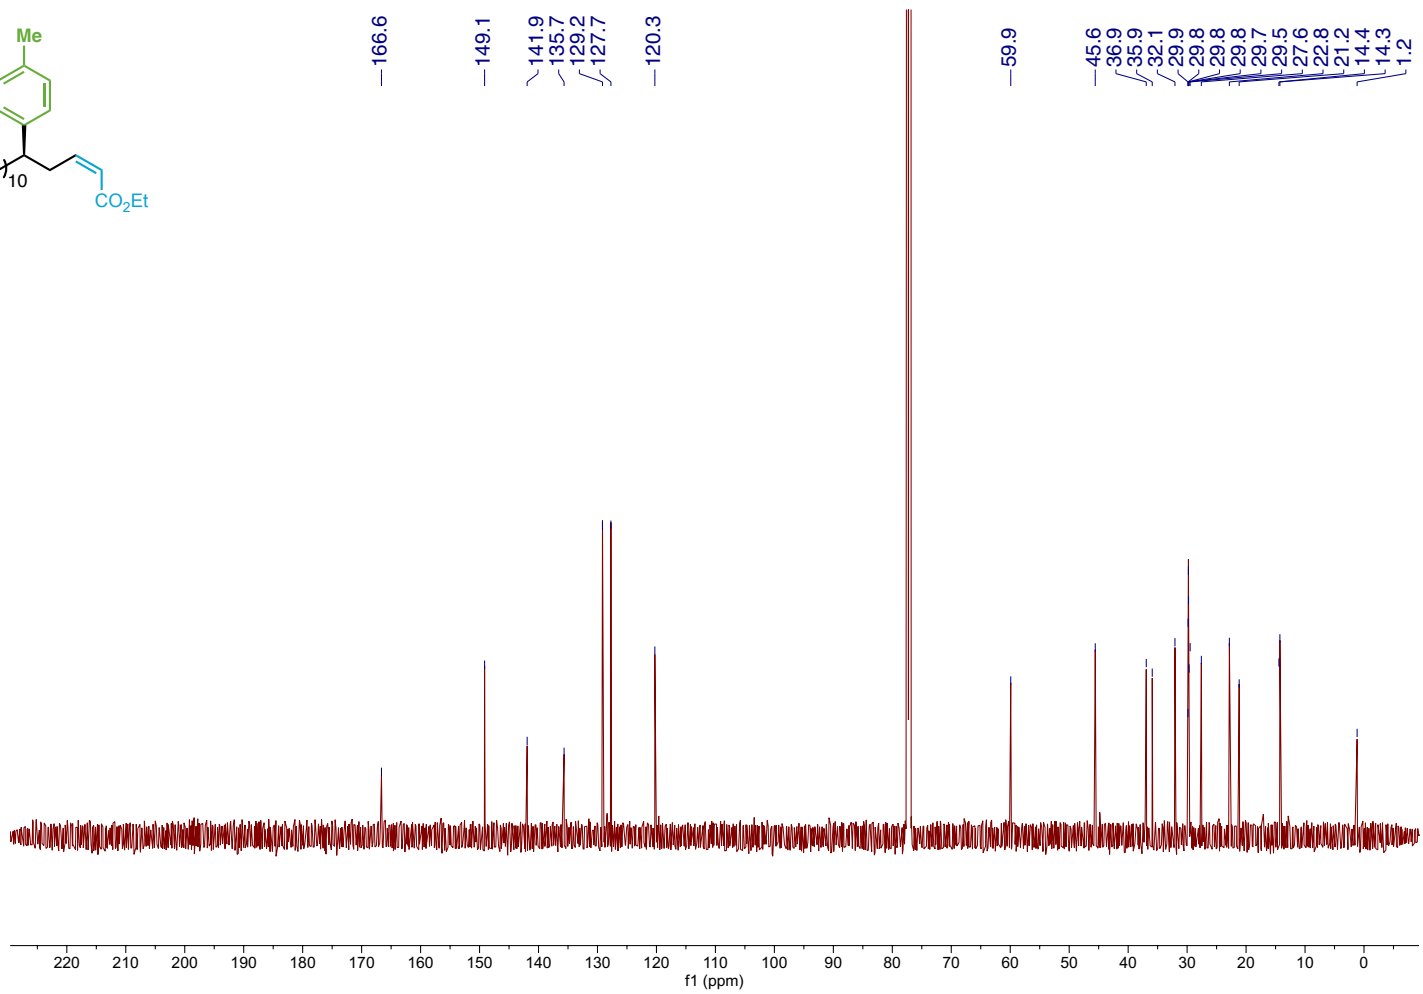

Compound 21 <sup>1</sup>H NMR

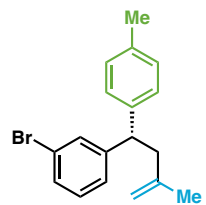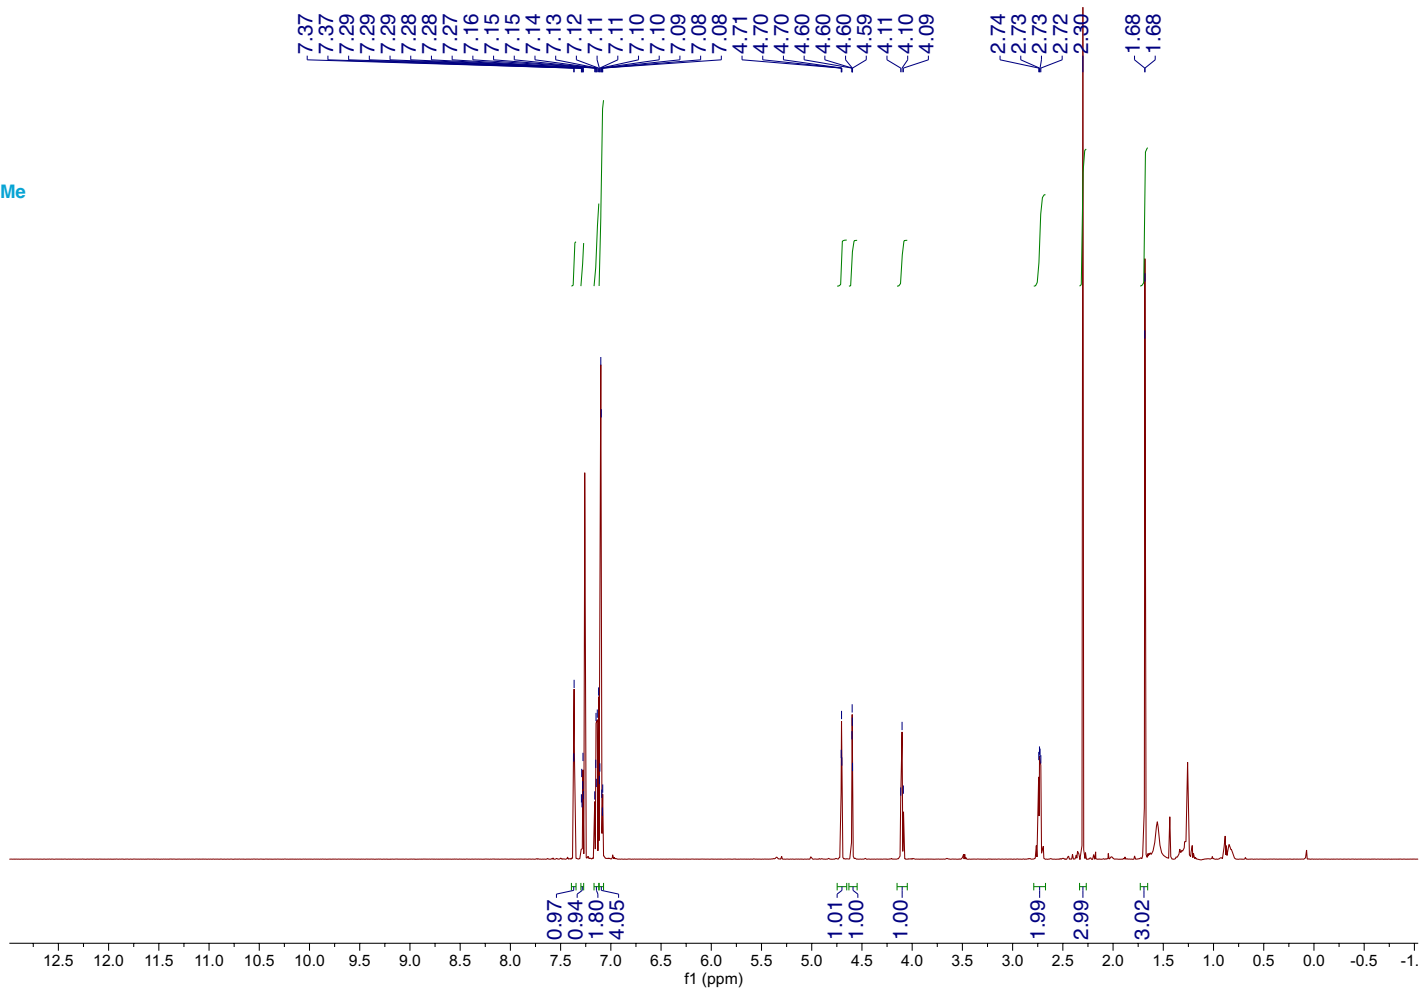

Compound 21 <sup>13</sup>C NMR

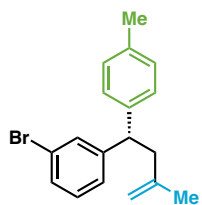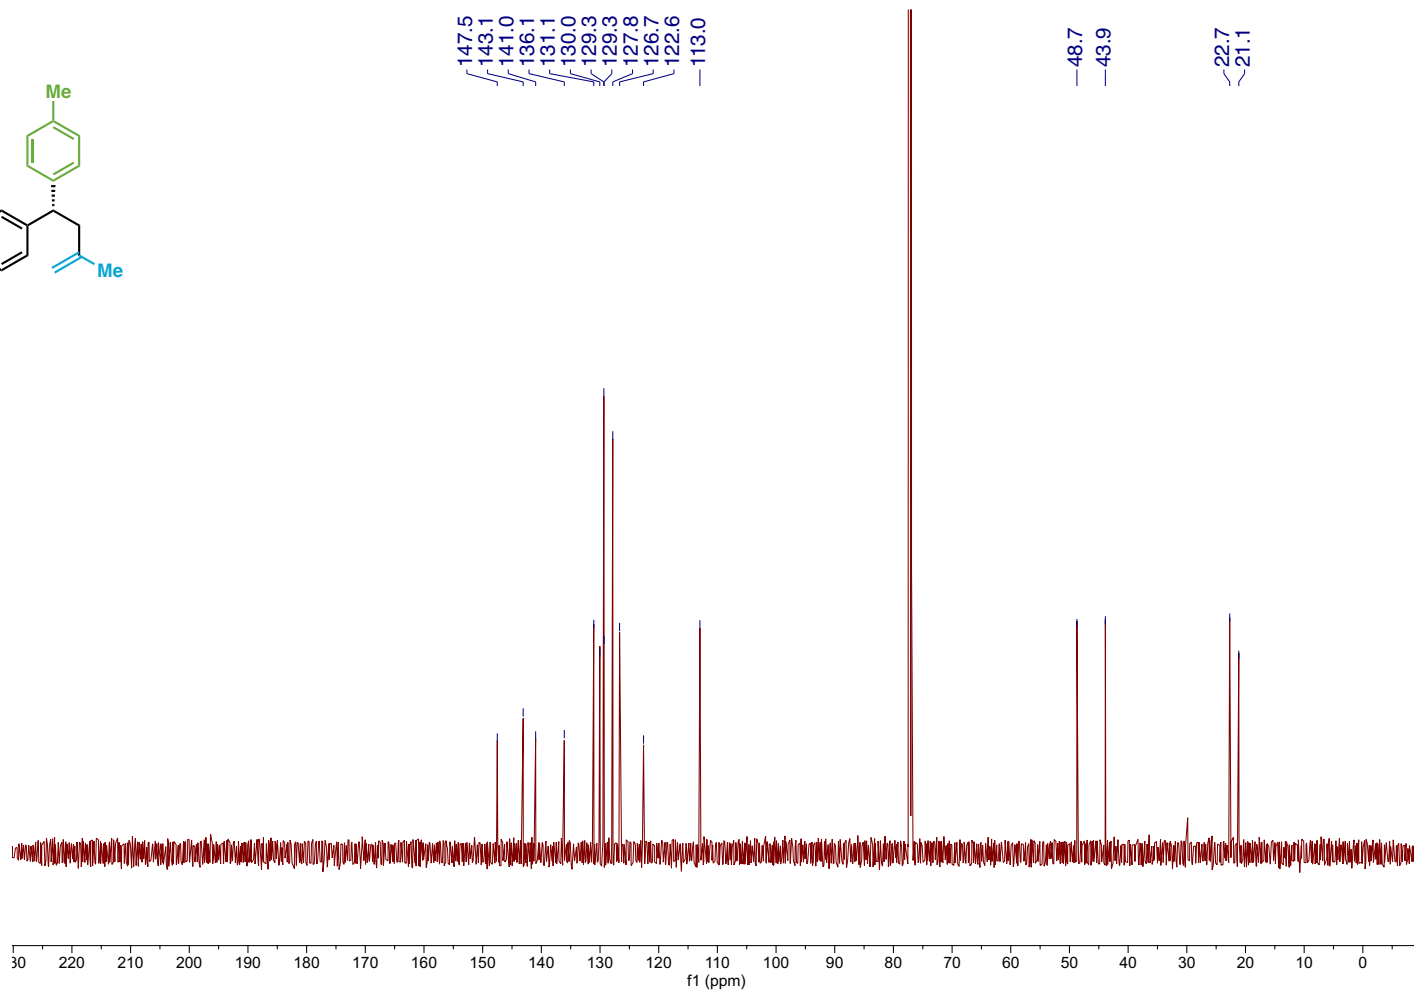



Compound 22 <sup>1</sup>H NMR

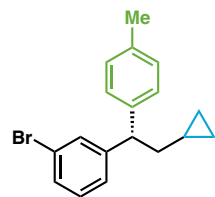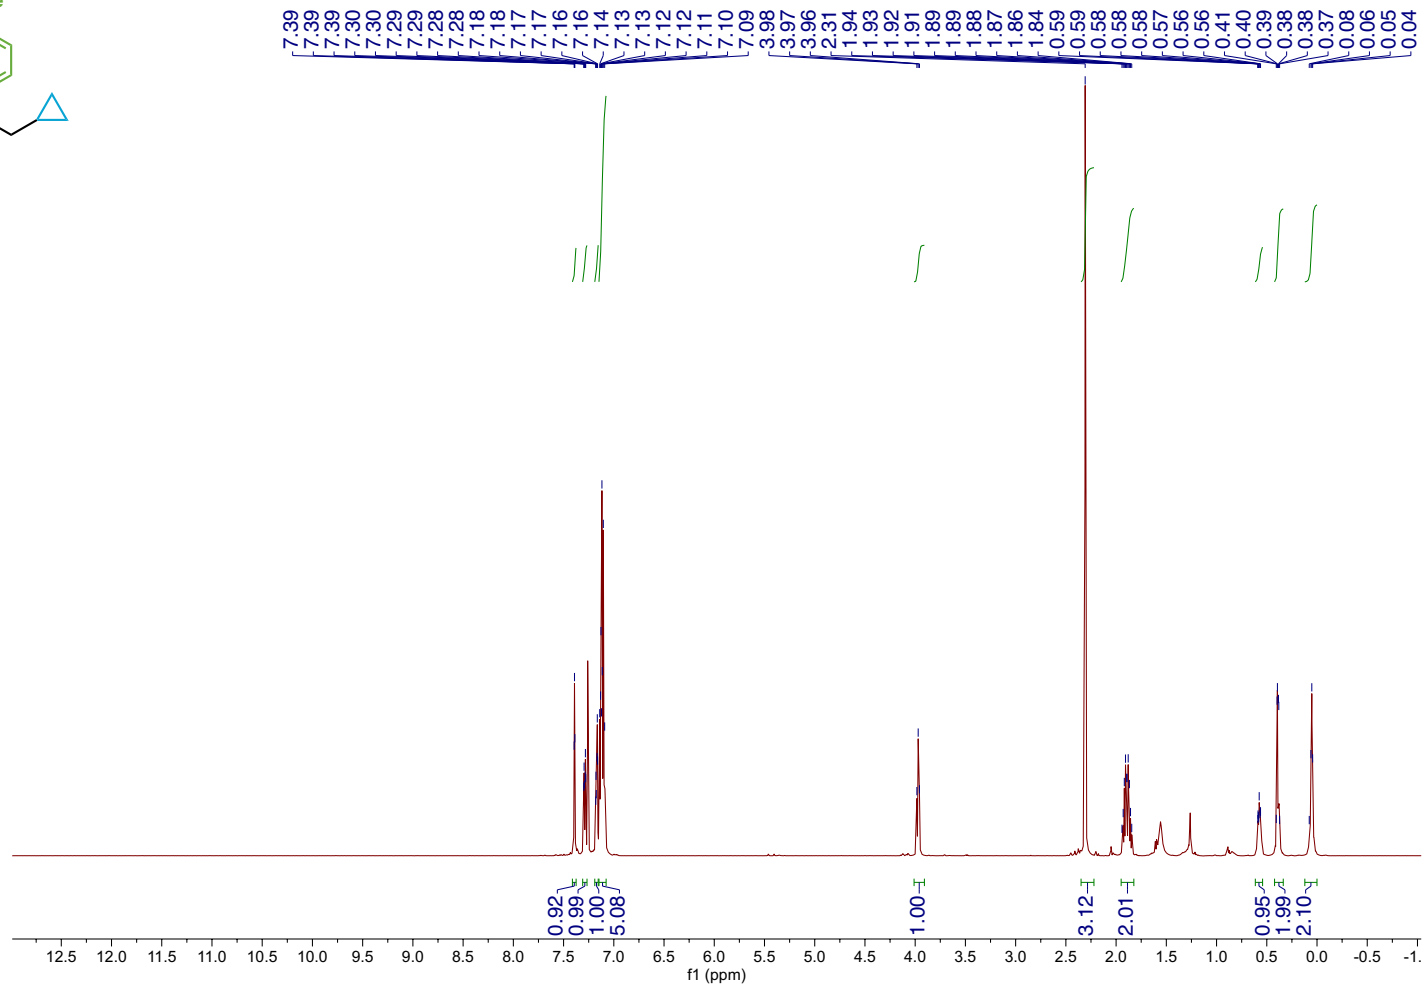

Compound 22 <sup>13</sup>C NMR

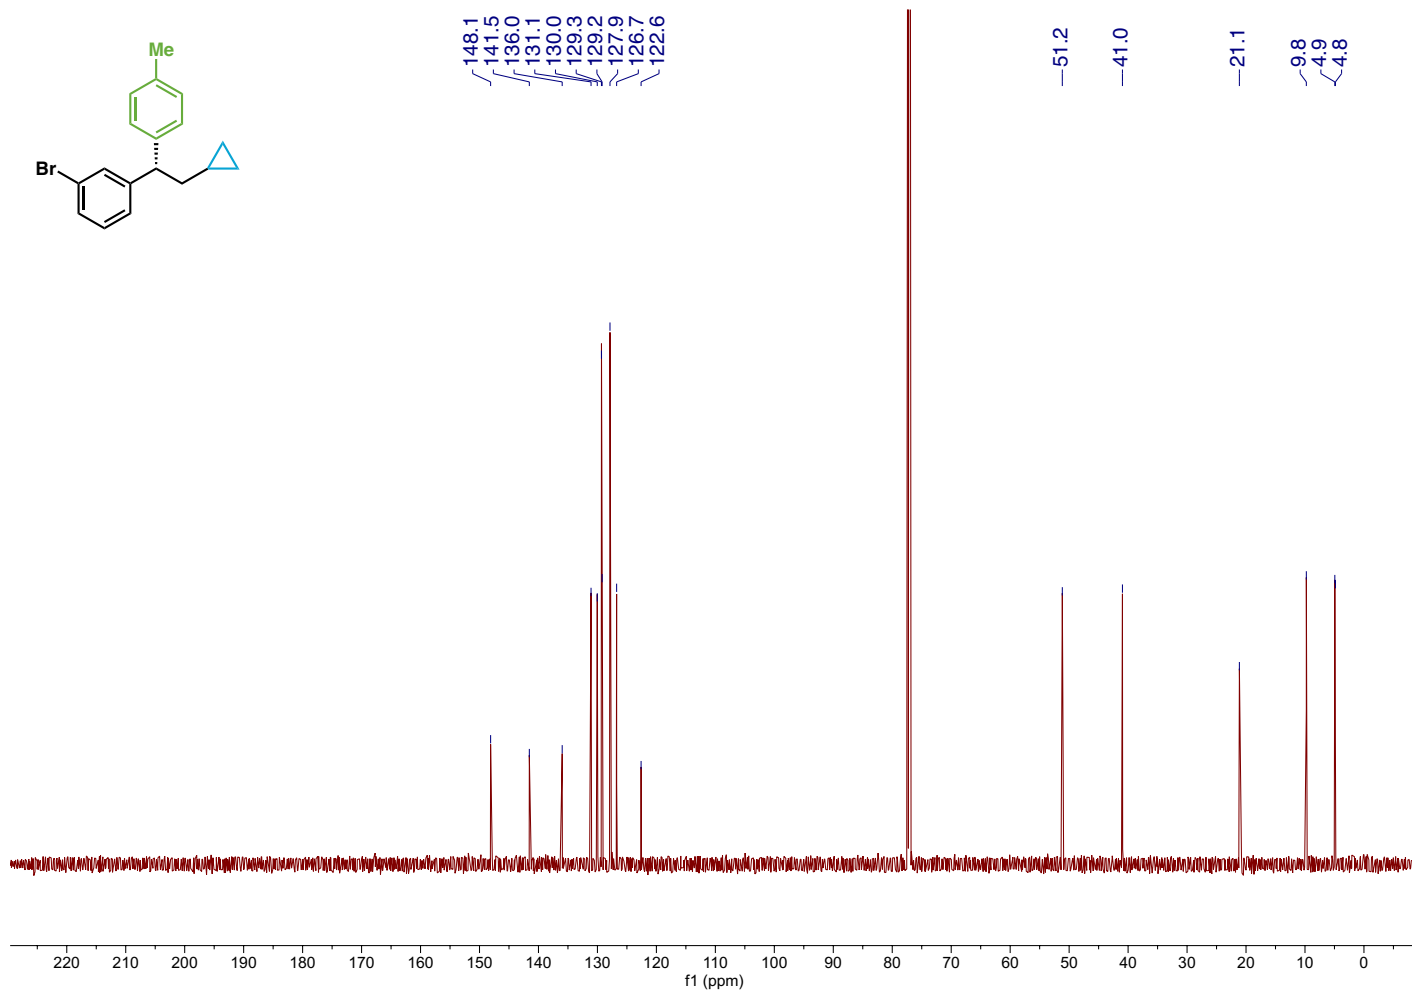

Compound 23 <sup>1</sup>H NMR

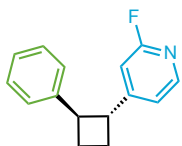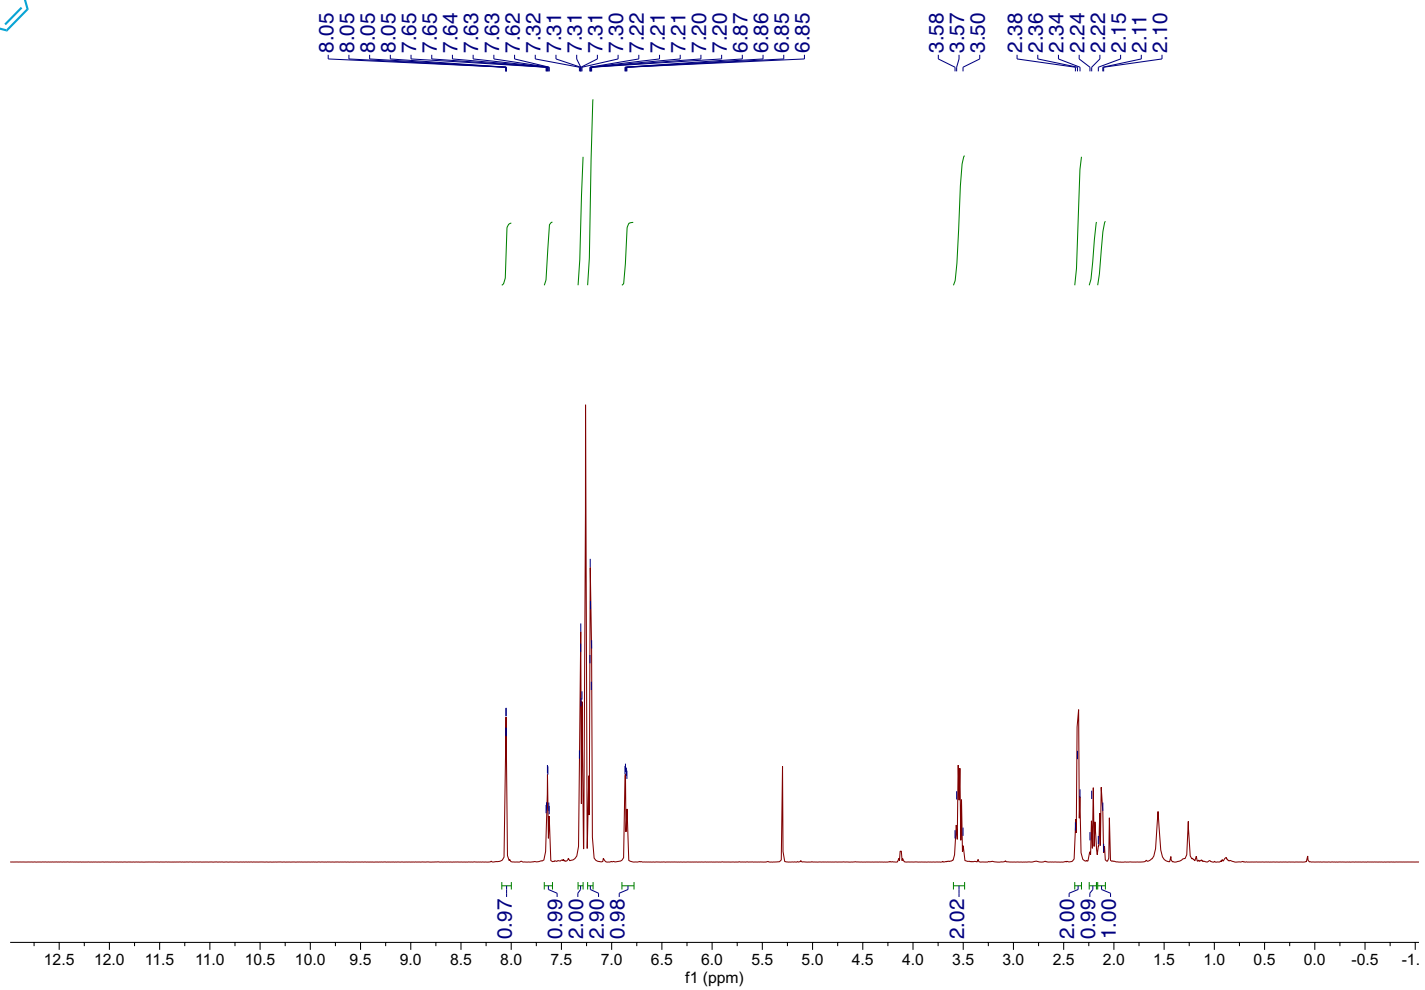

Compound 23 <sup>19</sup>F NMR

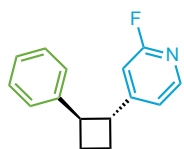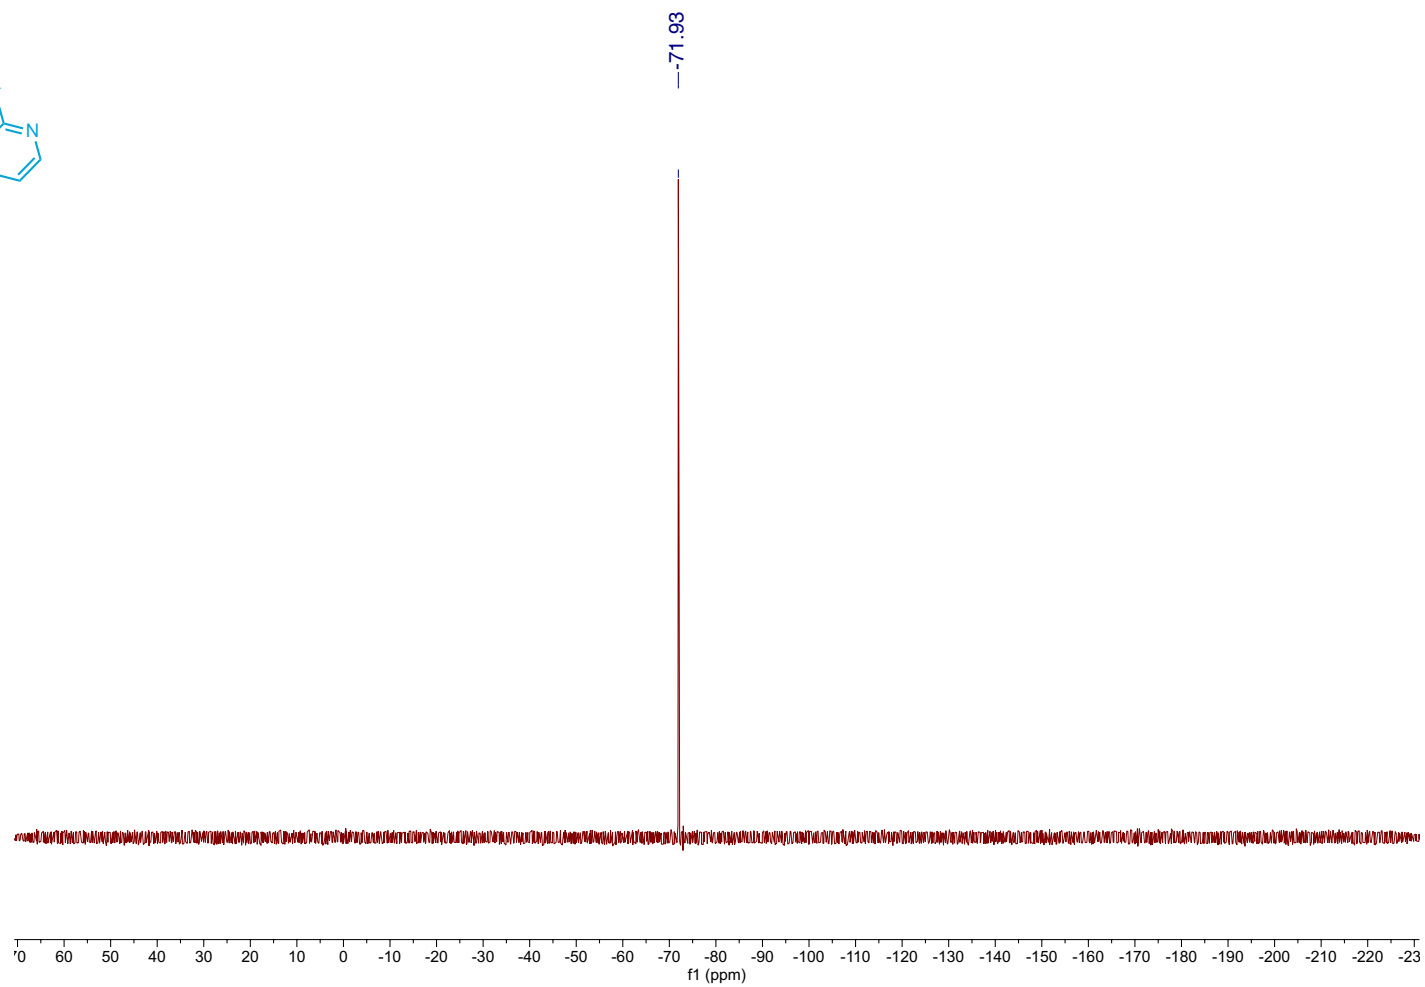

# Compound 23 <sup>13</sup>C NMR

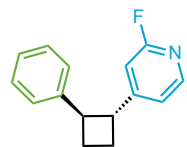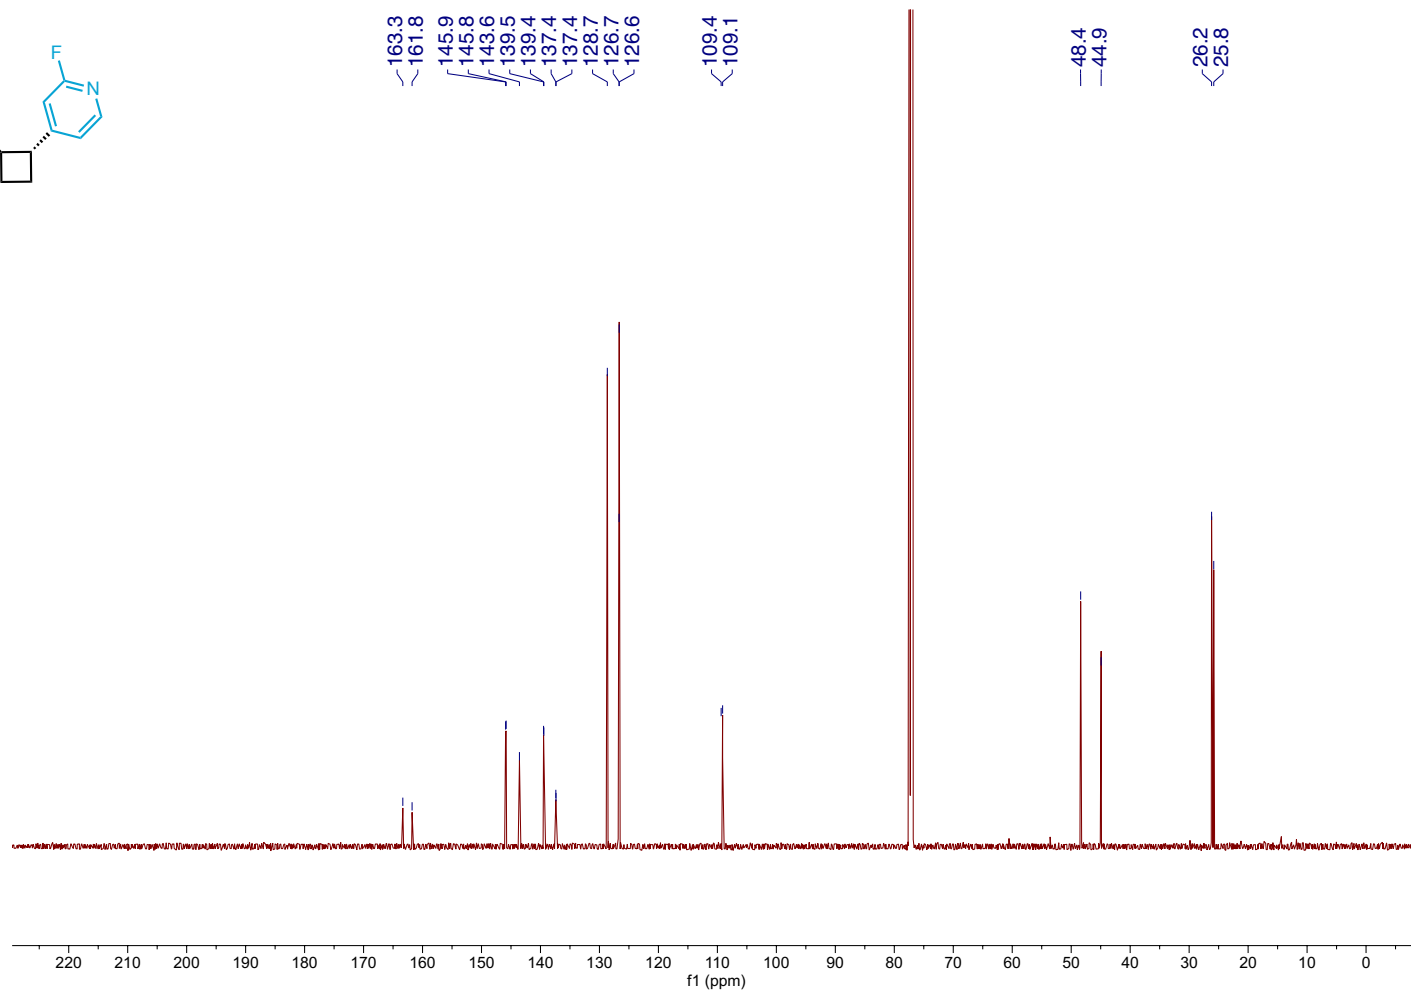

# Compound 24 <sup>1</sup>H NMR

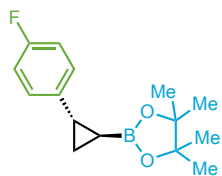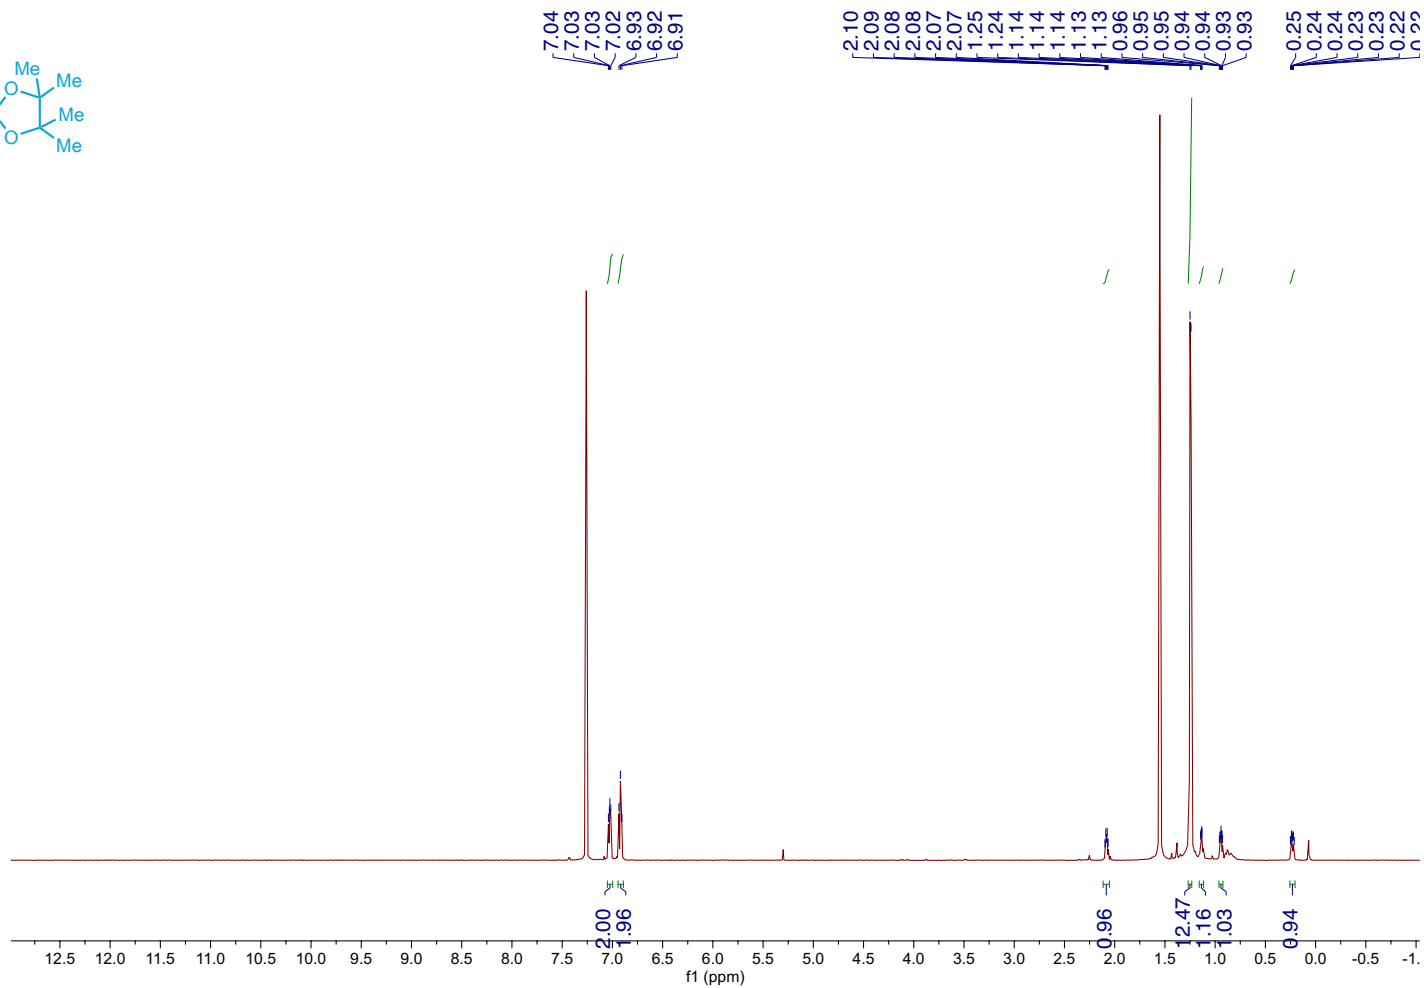

Compound 24  $^{19}\text{F}$  NMR

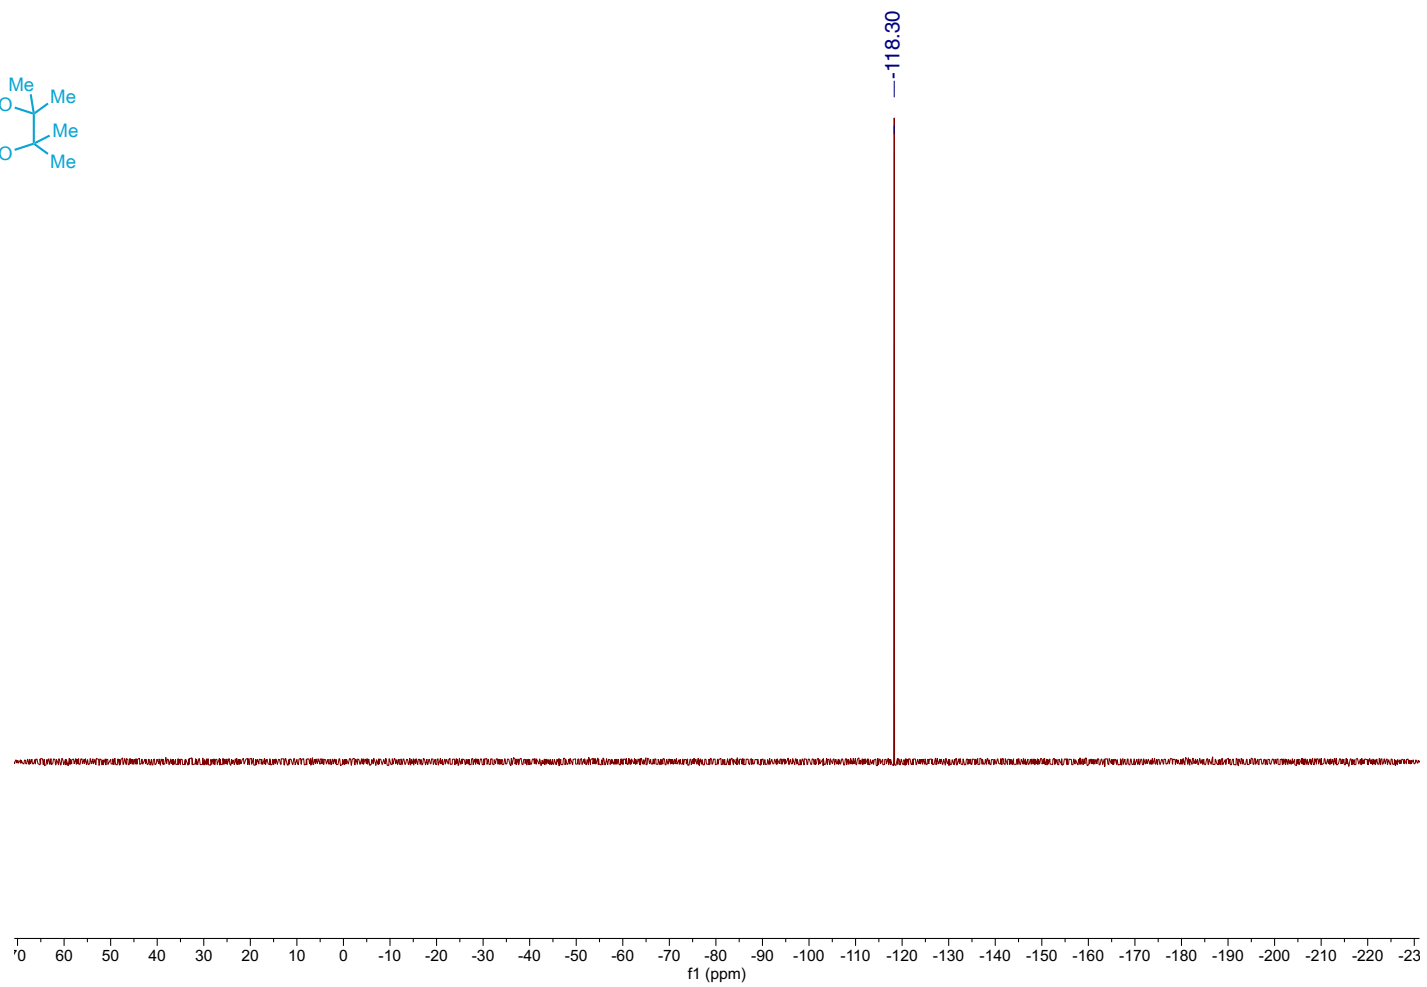

# Compound 24 <sup>13</sup>C NMR

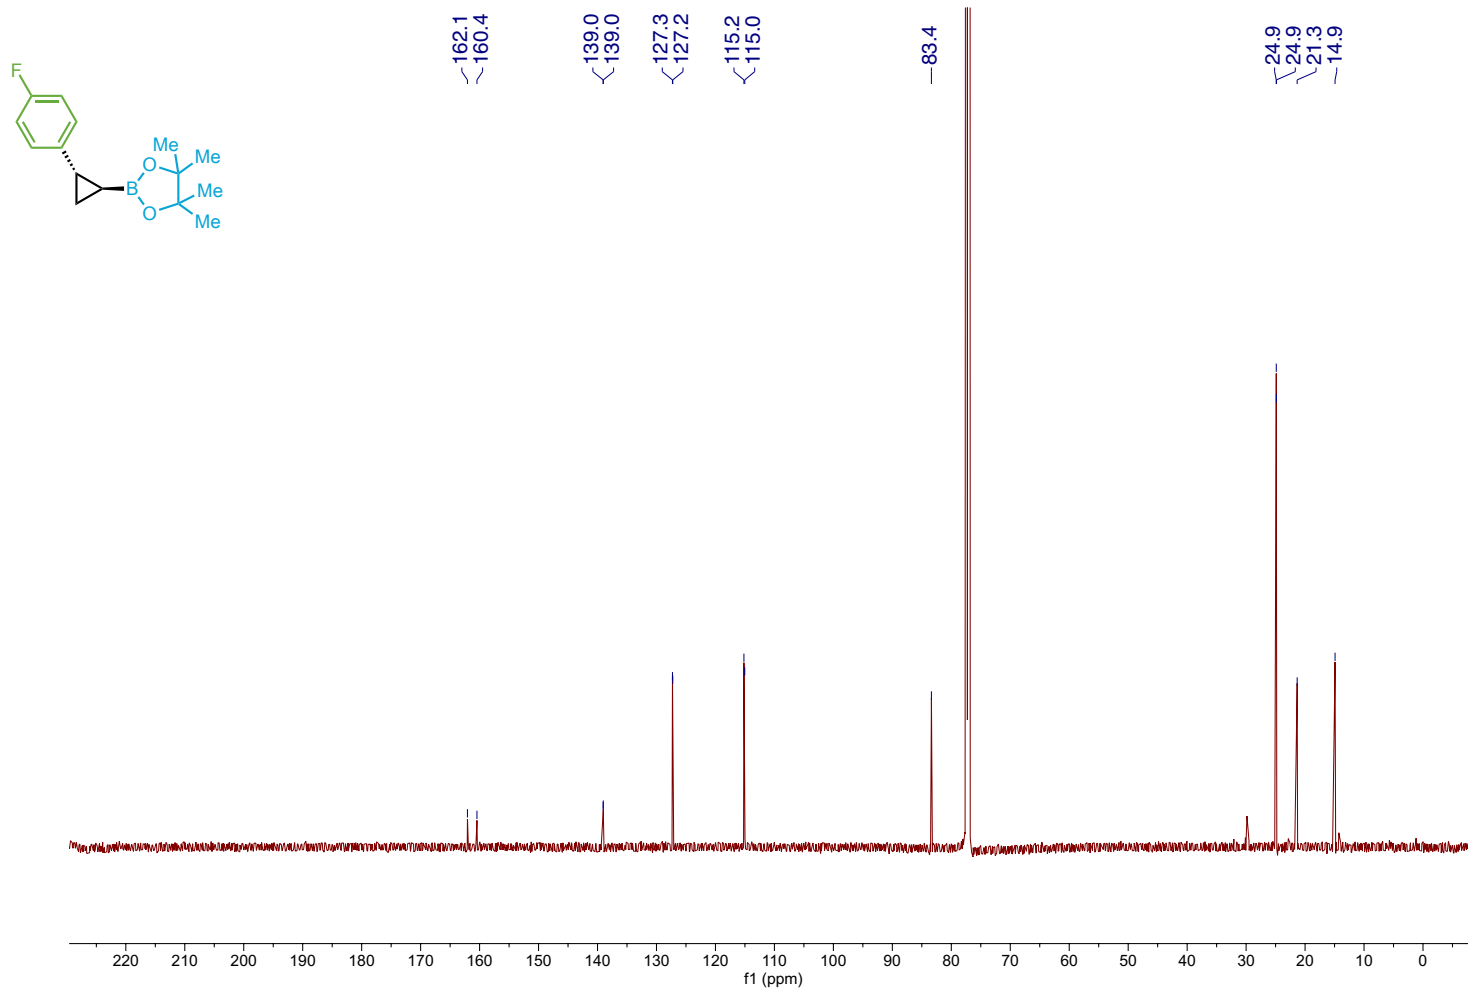



Compound B8 <sup>1</sup>H NMR

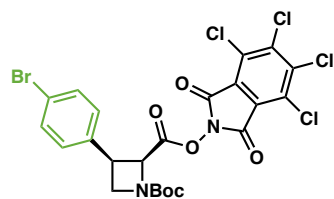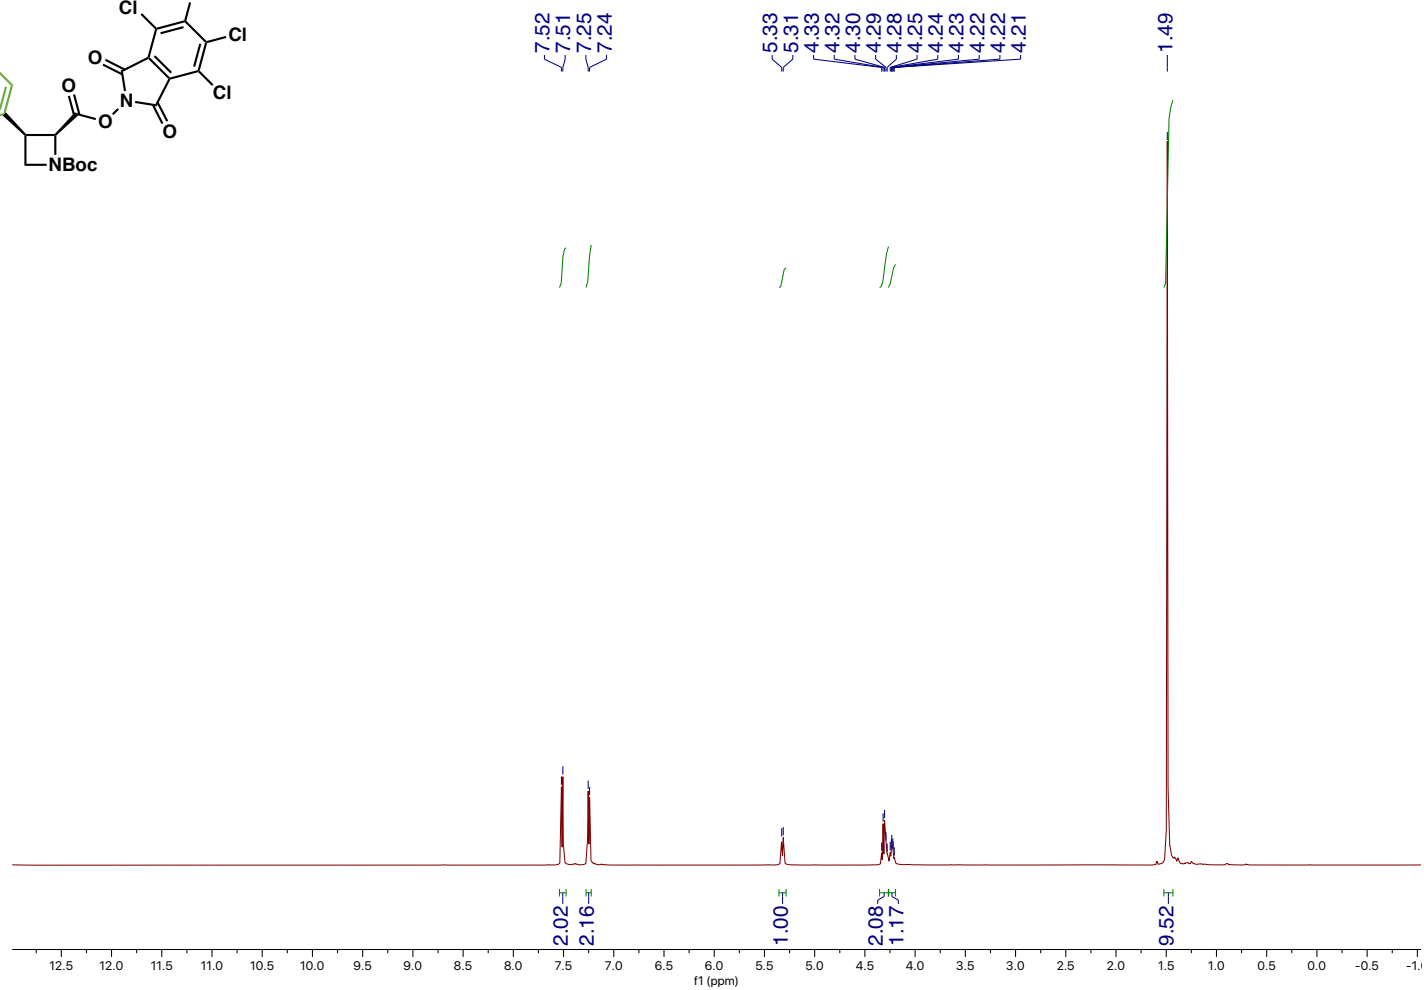

# Compound B8 <sup>13</sup>C NMR

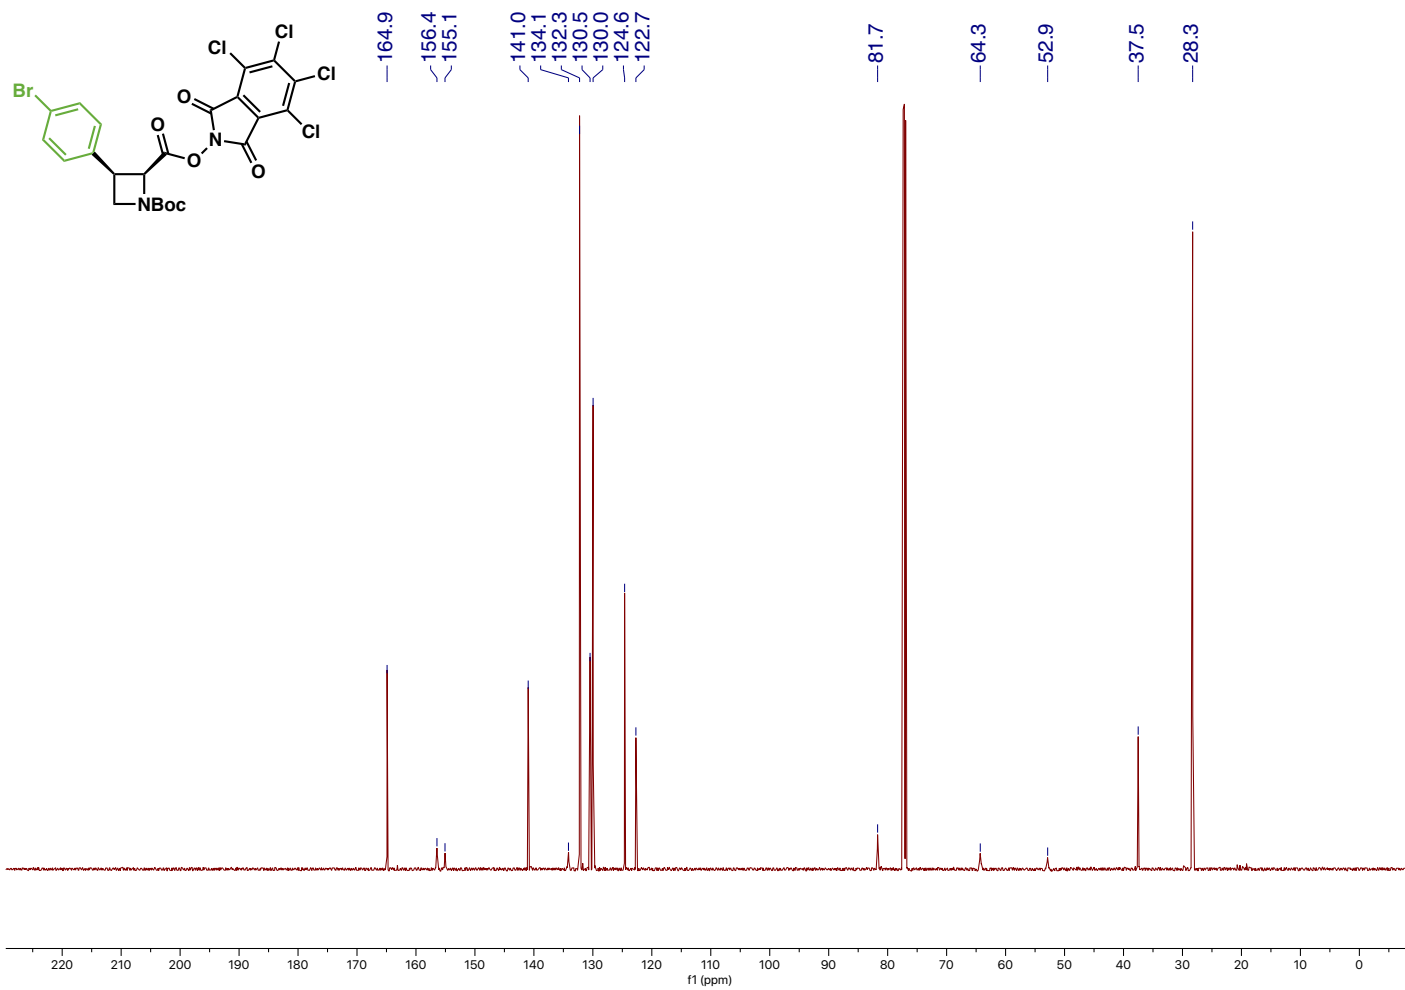

# Compound 26 <sup>1</sup>H NMR

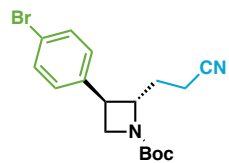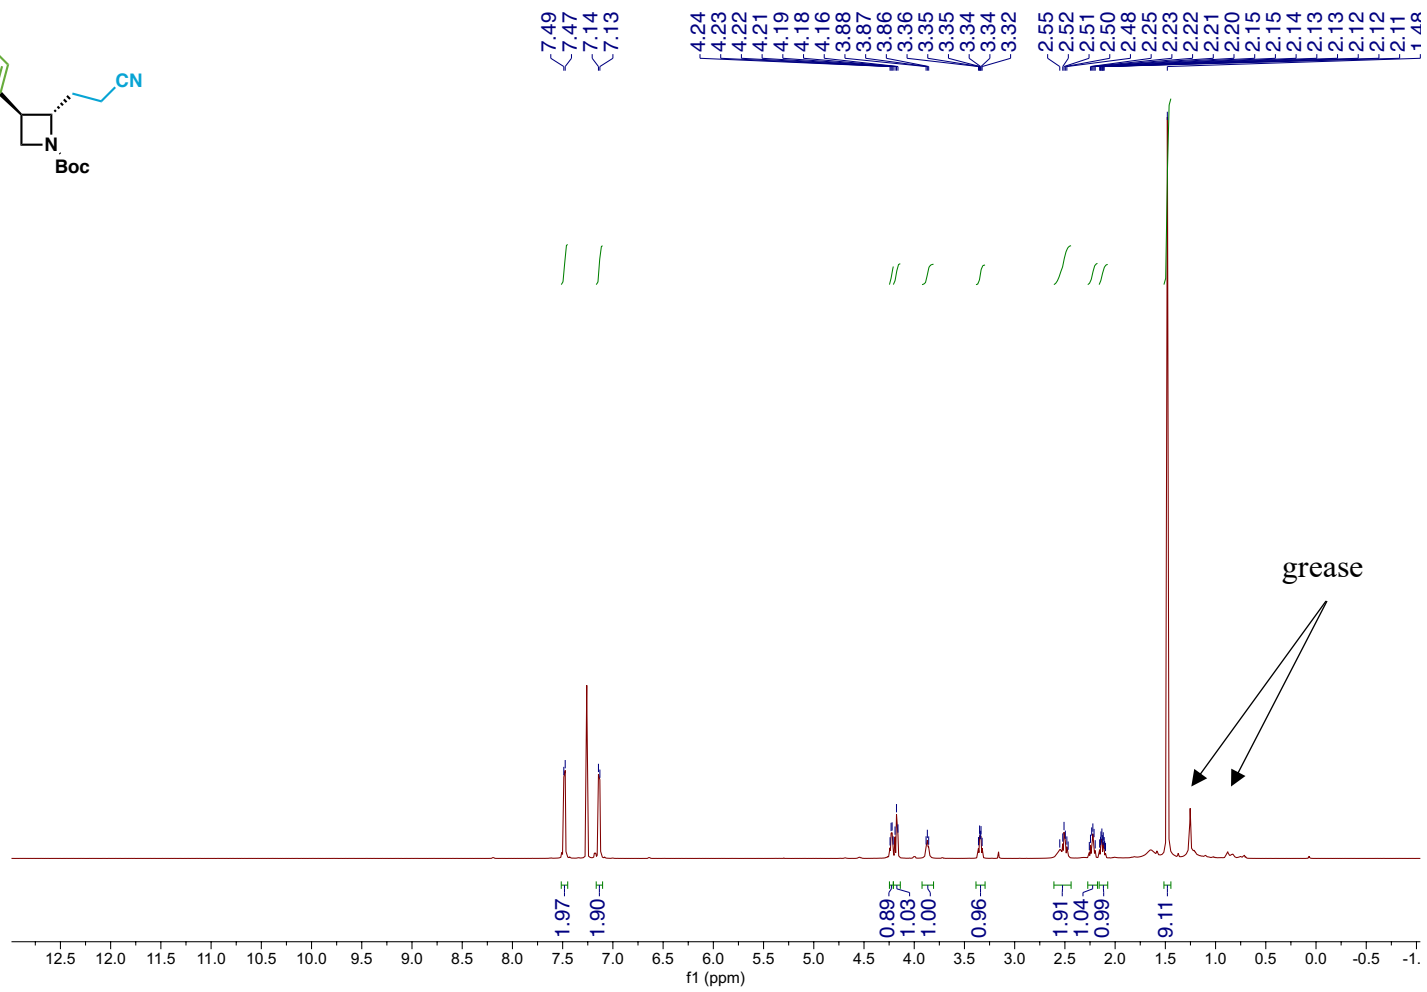

# Compound 26 <sup>13</sup>C NMR

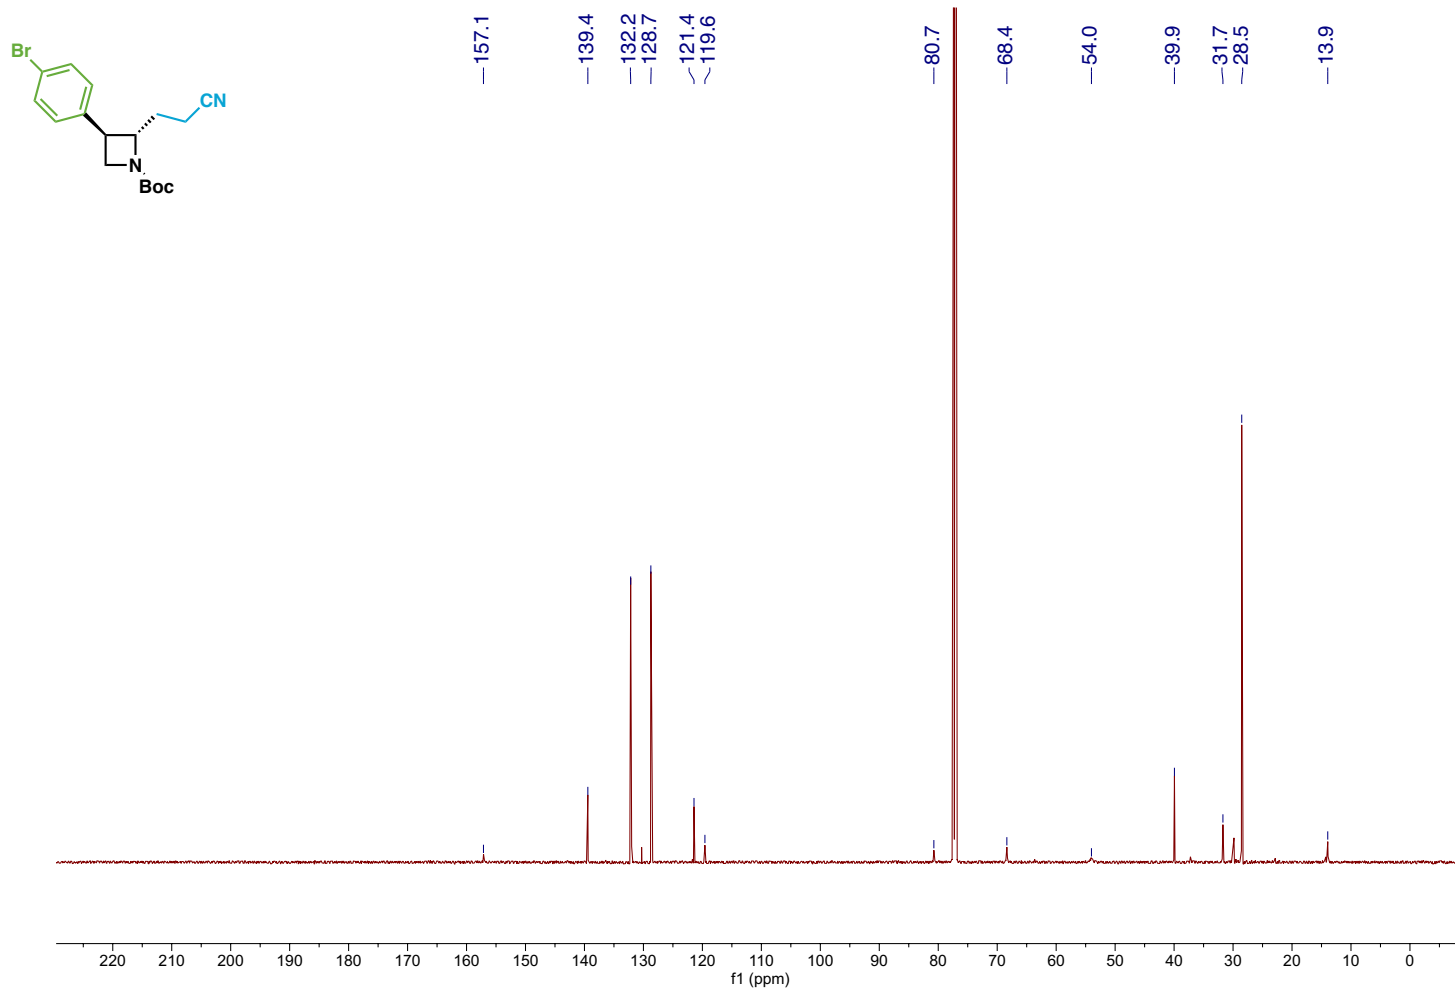

Compound 27 <sup>1</sup>H NMR

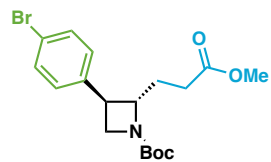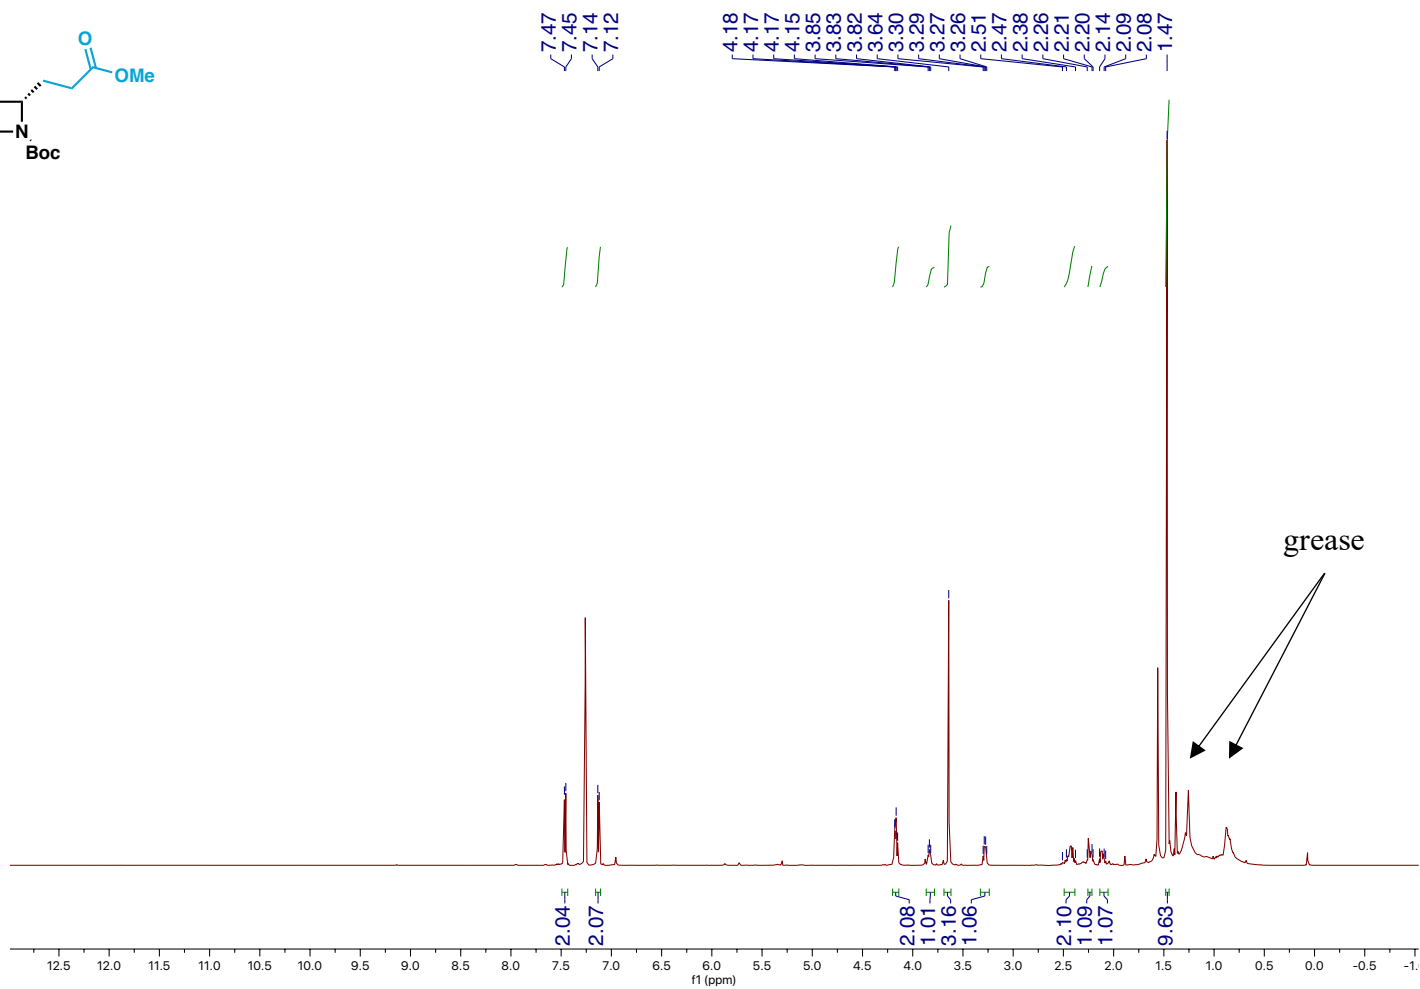

# Compound 27 <sup>13</sup>C NMR

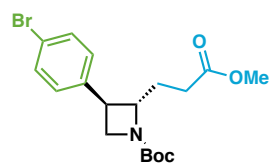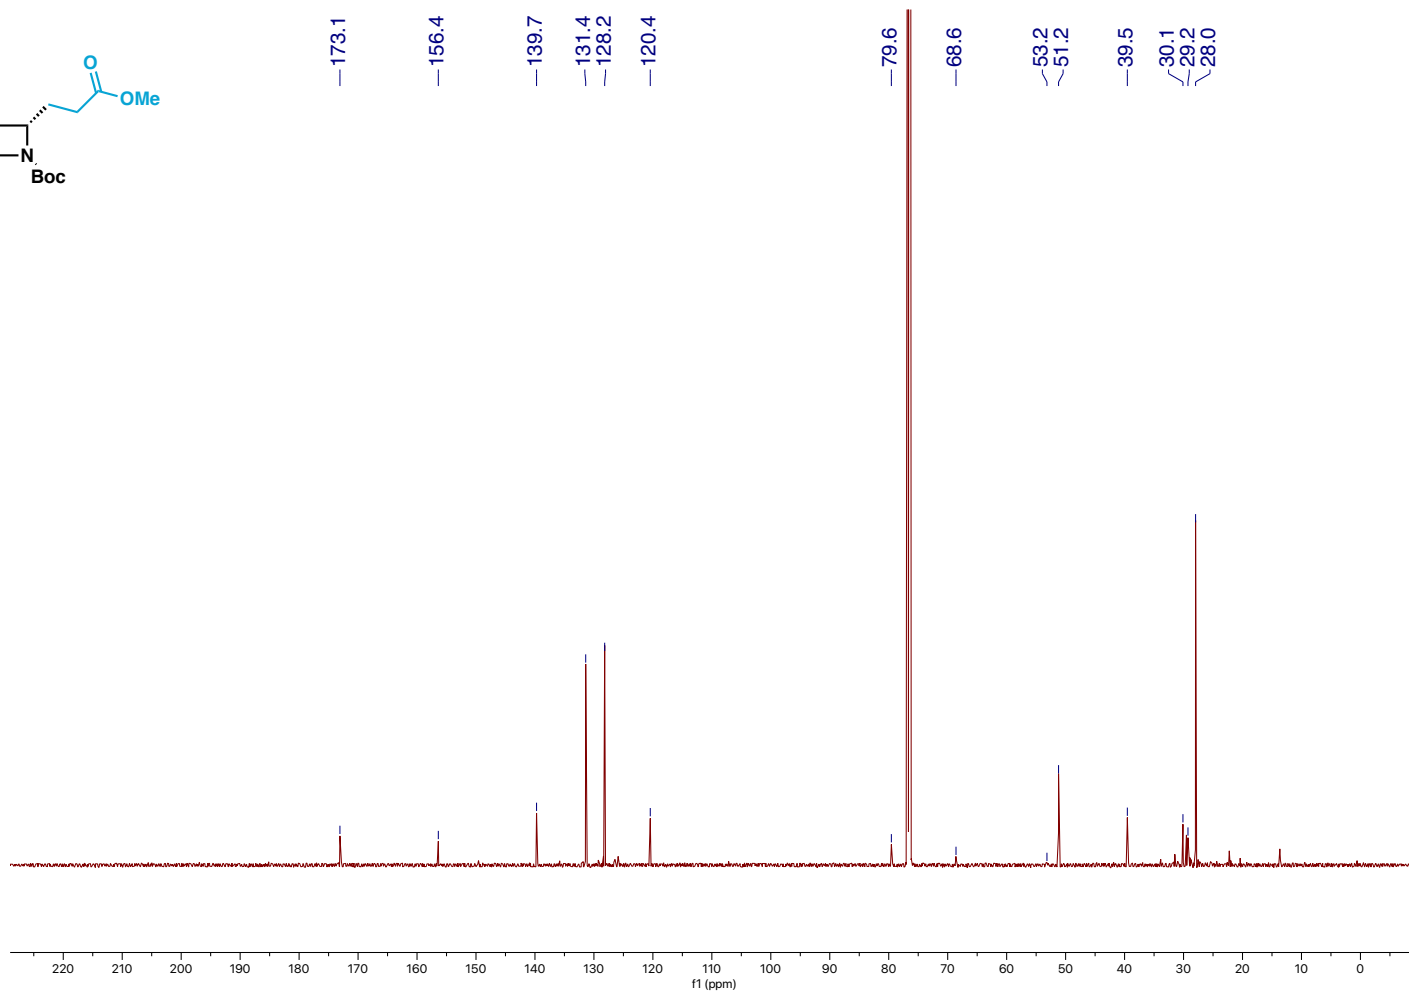

Compound 28 <sup>1</sup>H NMR

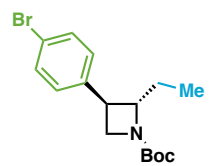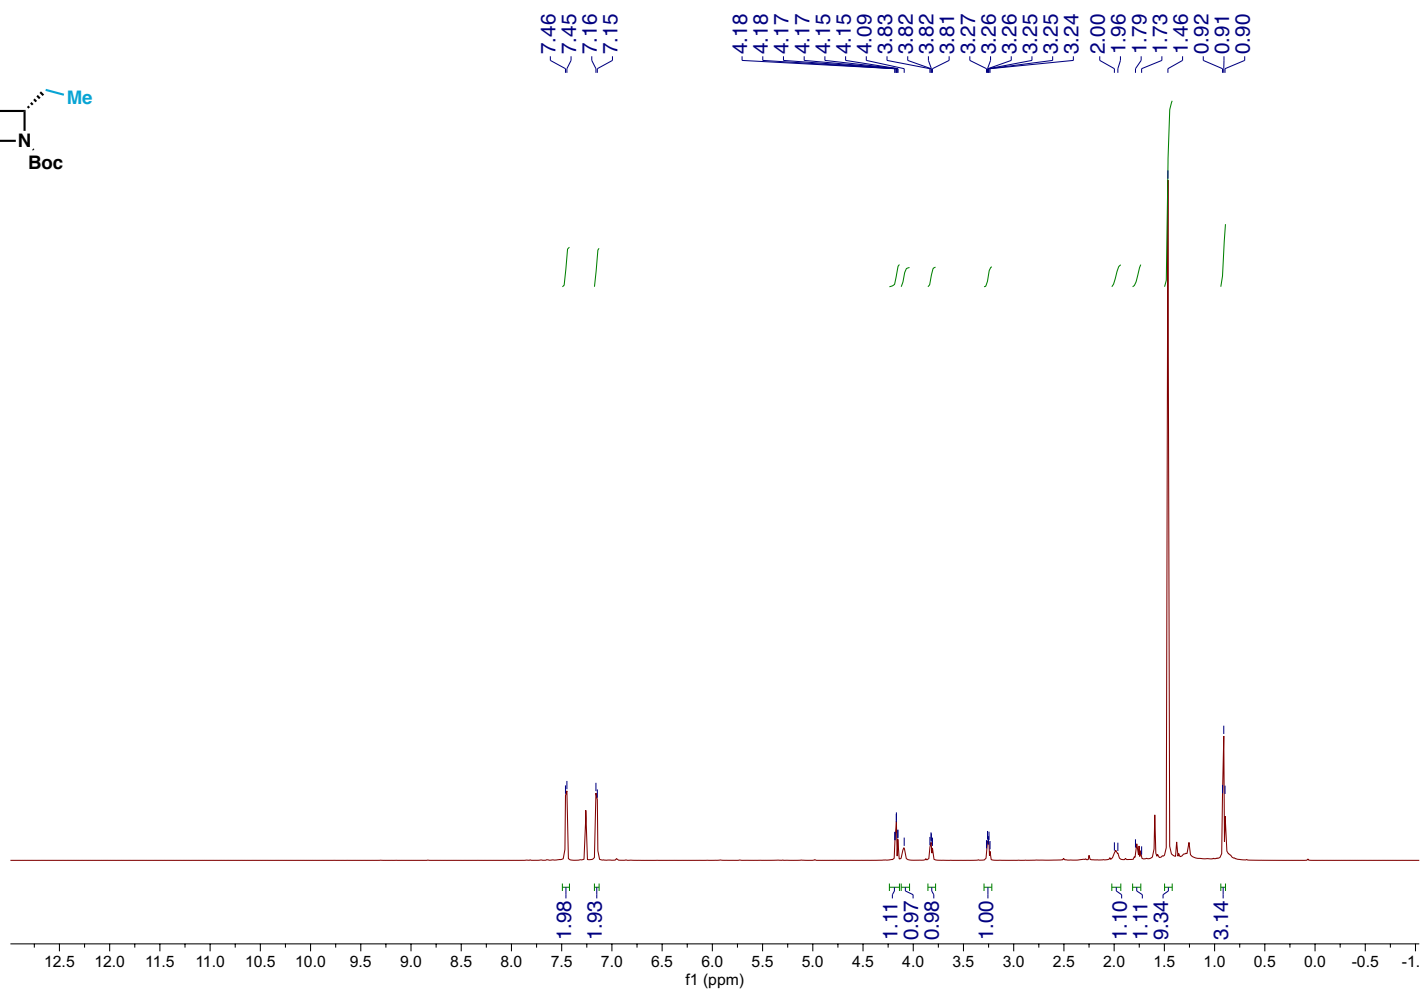

# Compound 28 $^{13}\text{C}$ NMR

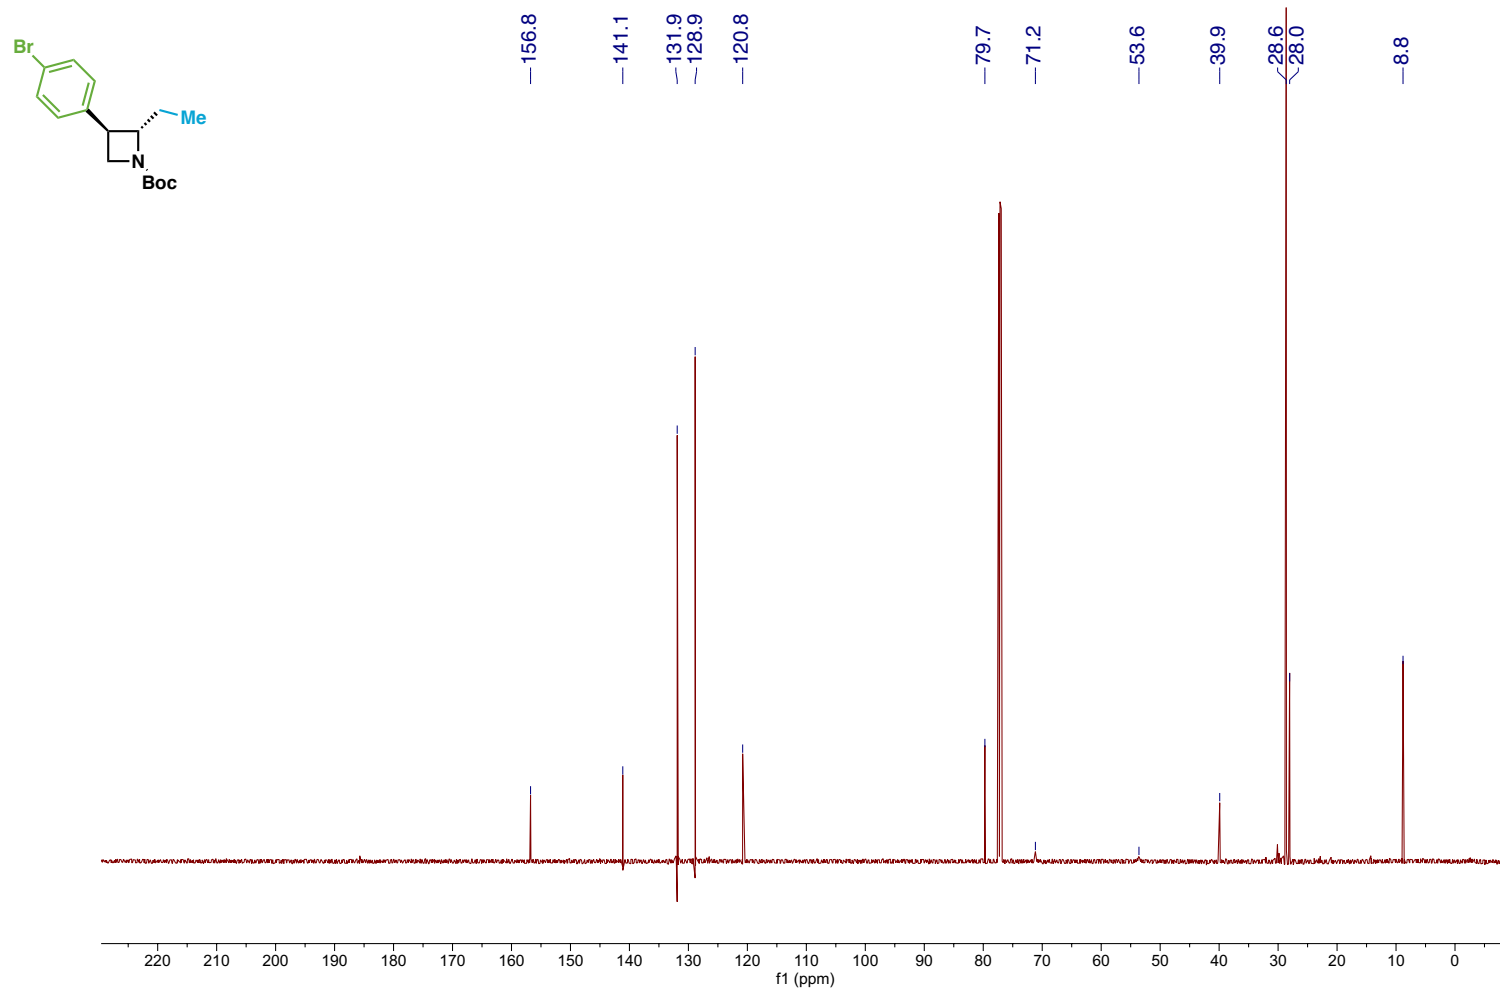



Compound 29 <sup>1</sup>H NMR

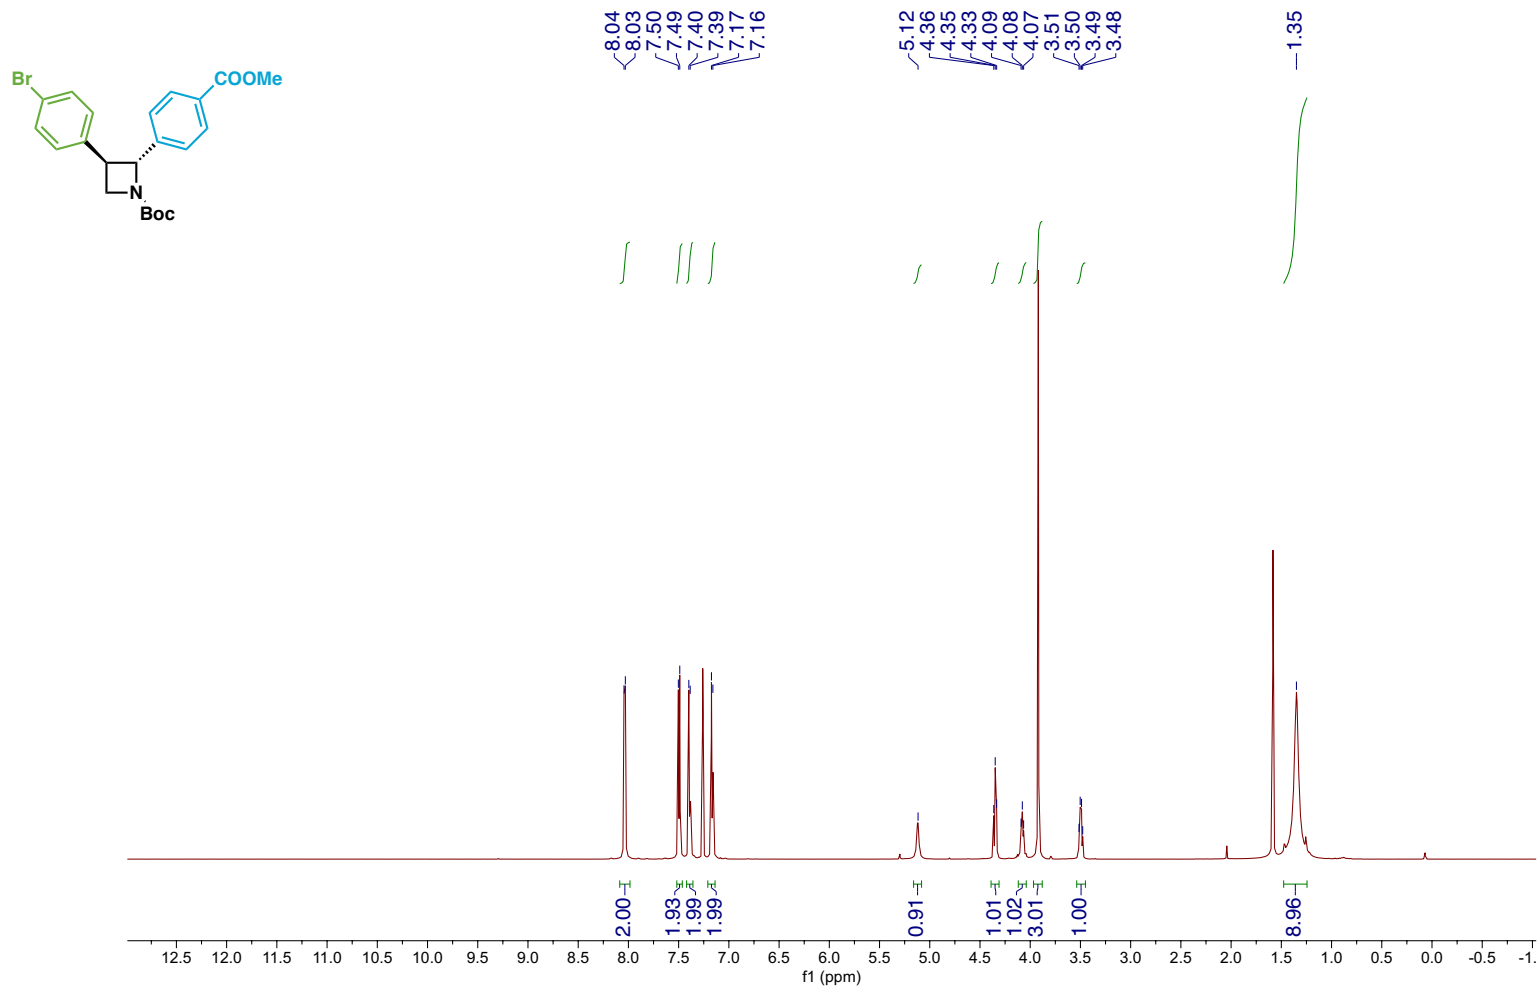

# Compound 29 <sup>13</sup>C NMR

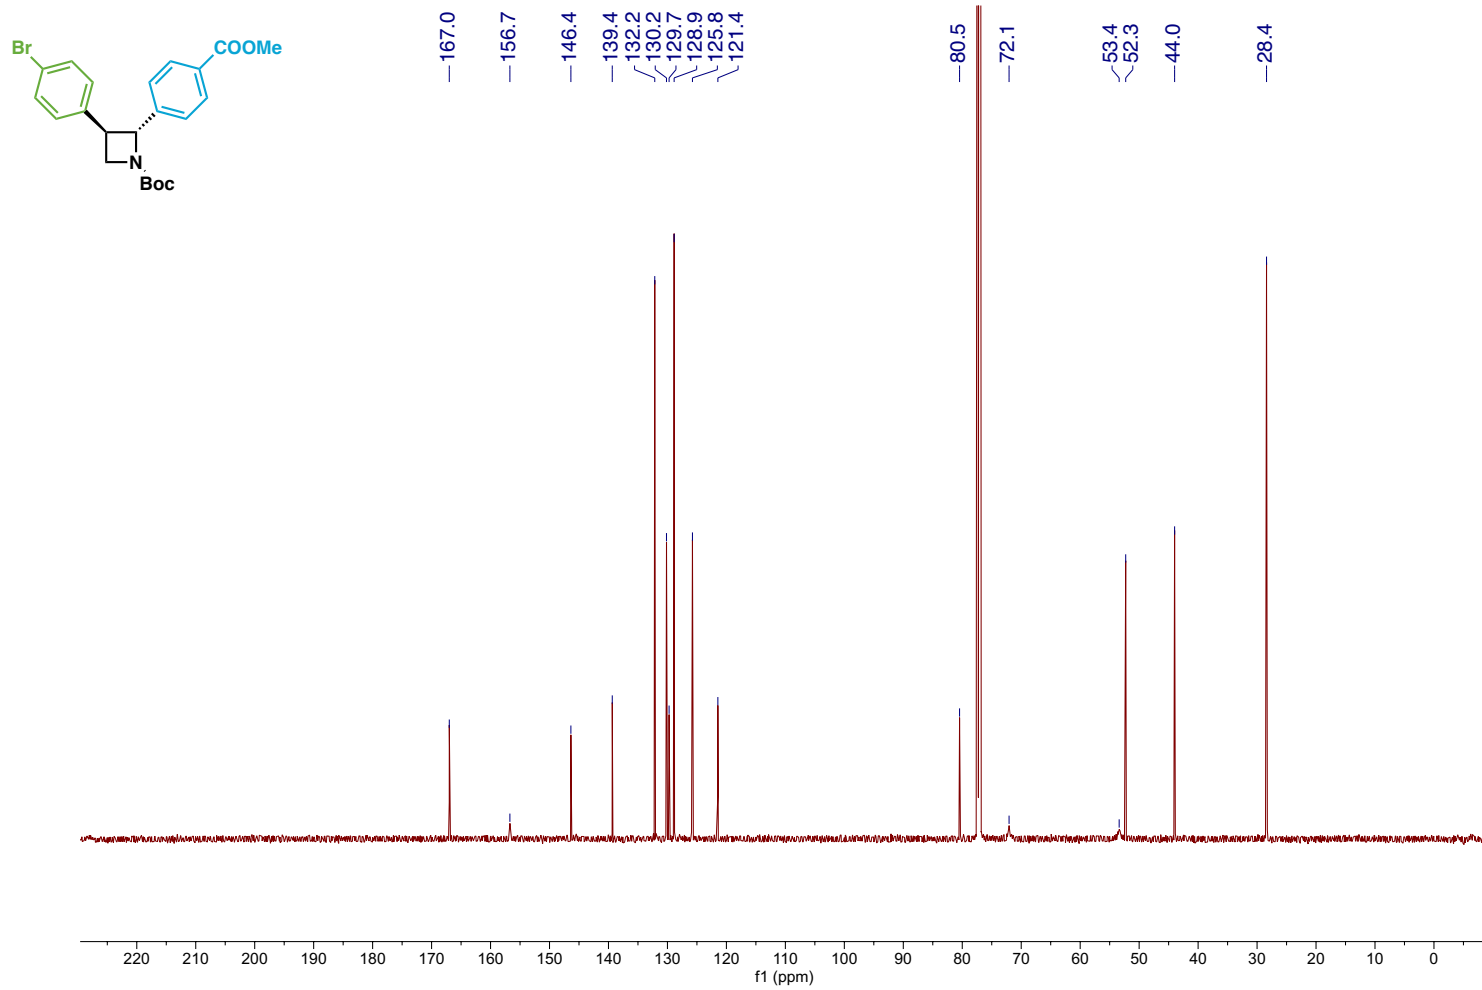

Compound 30  $^1\text{H}$  NMR

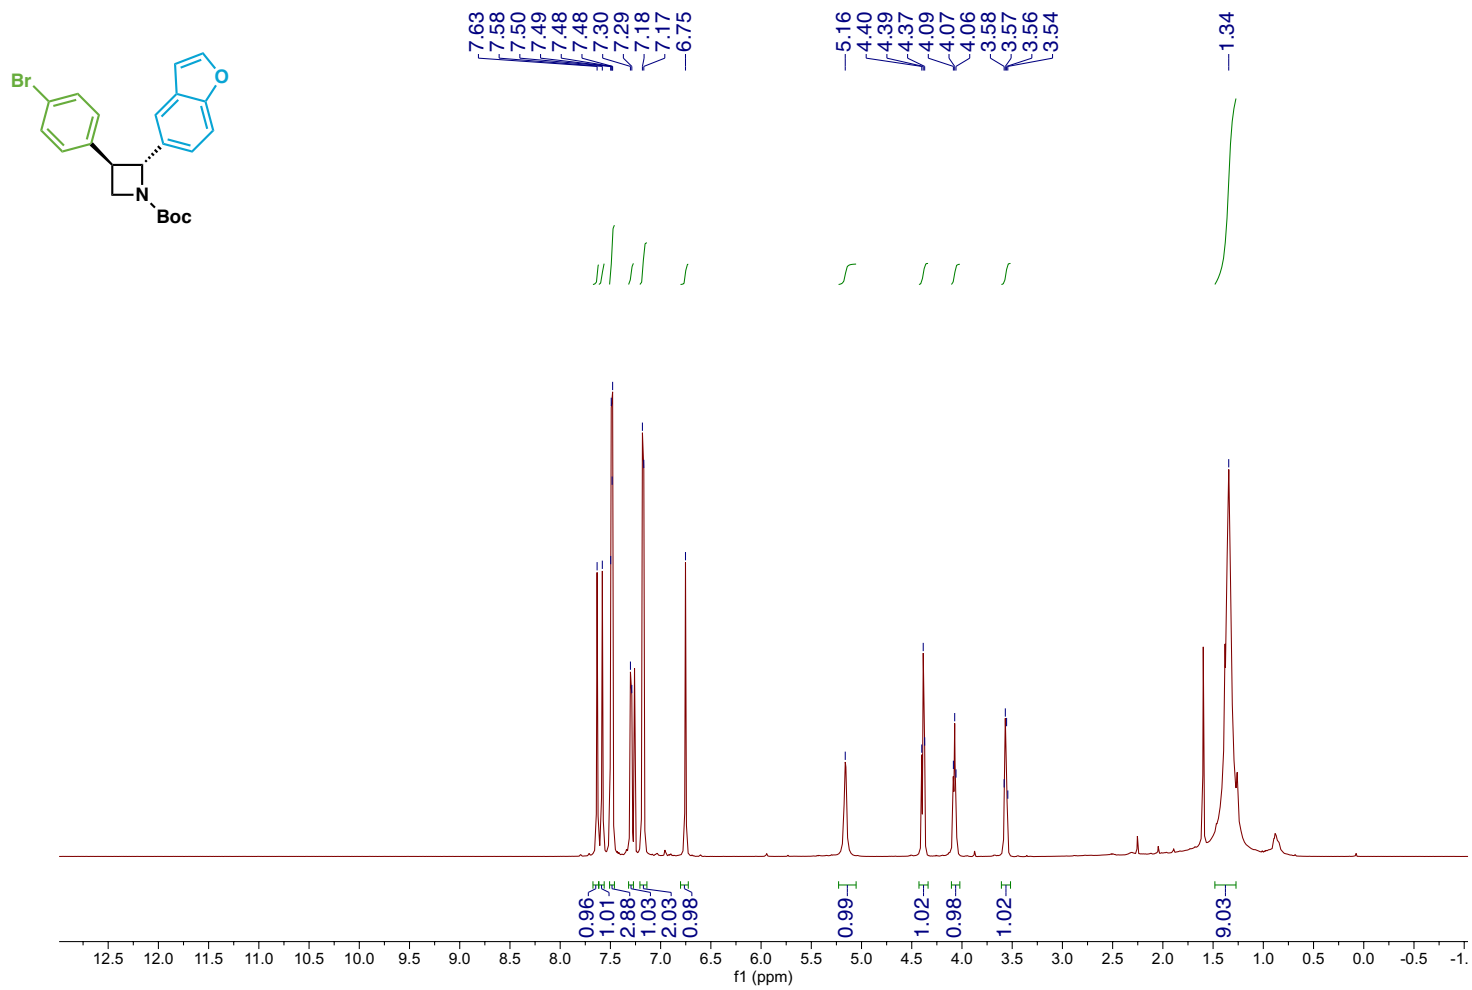

Compound 30 <sup>13</sup>C NMR

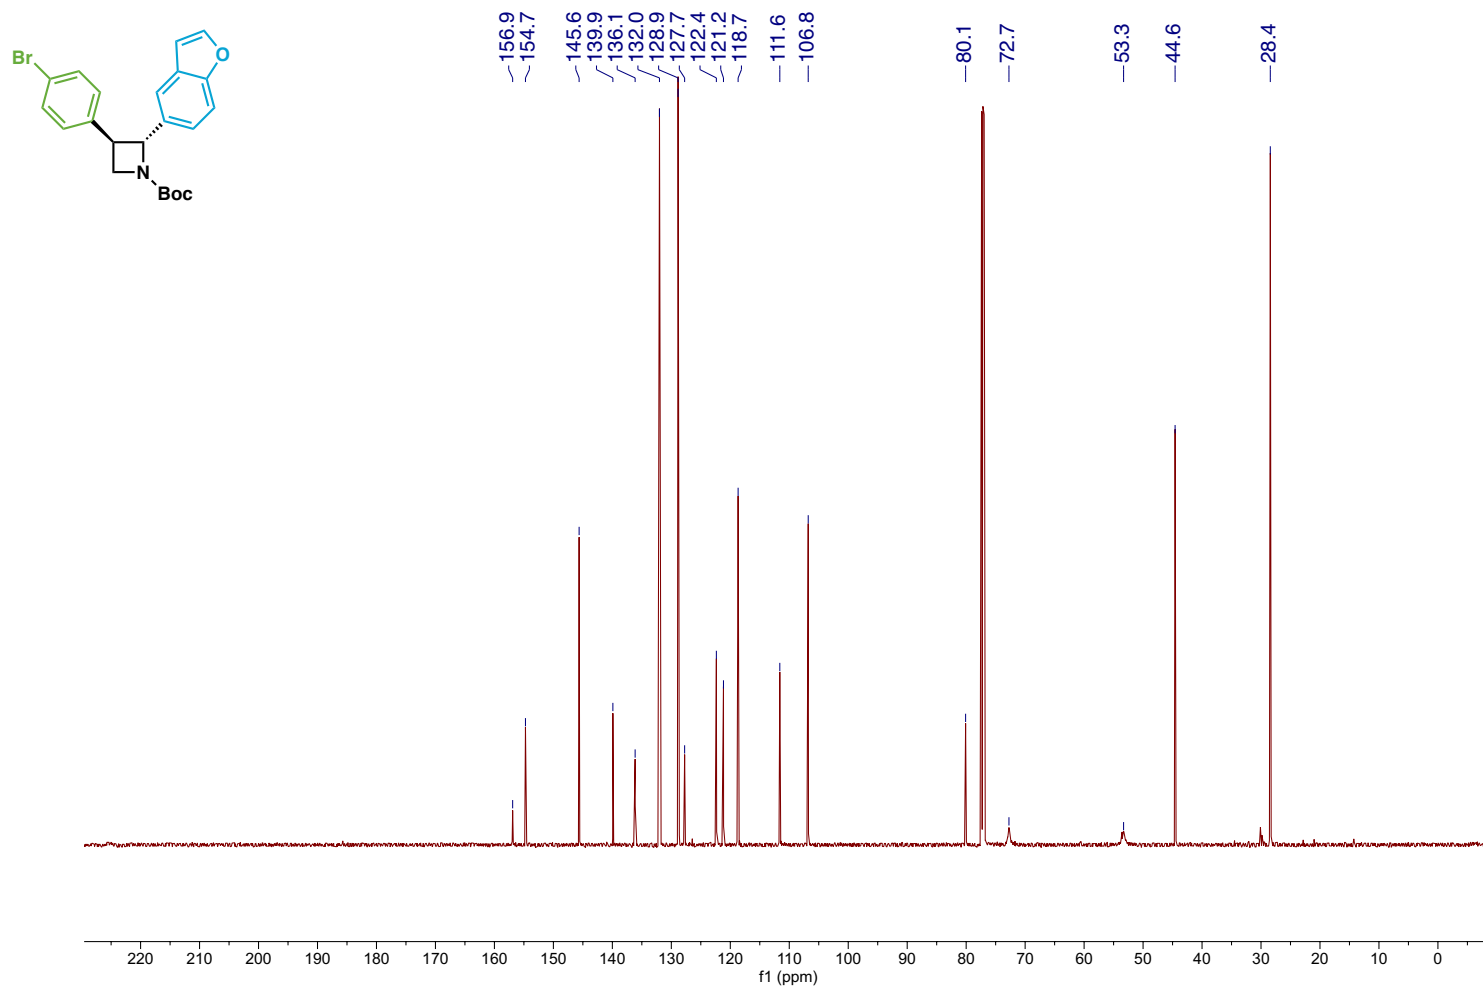

Compound 31 <sup>1</sup>H NMR

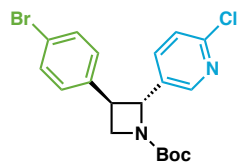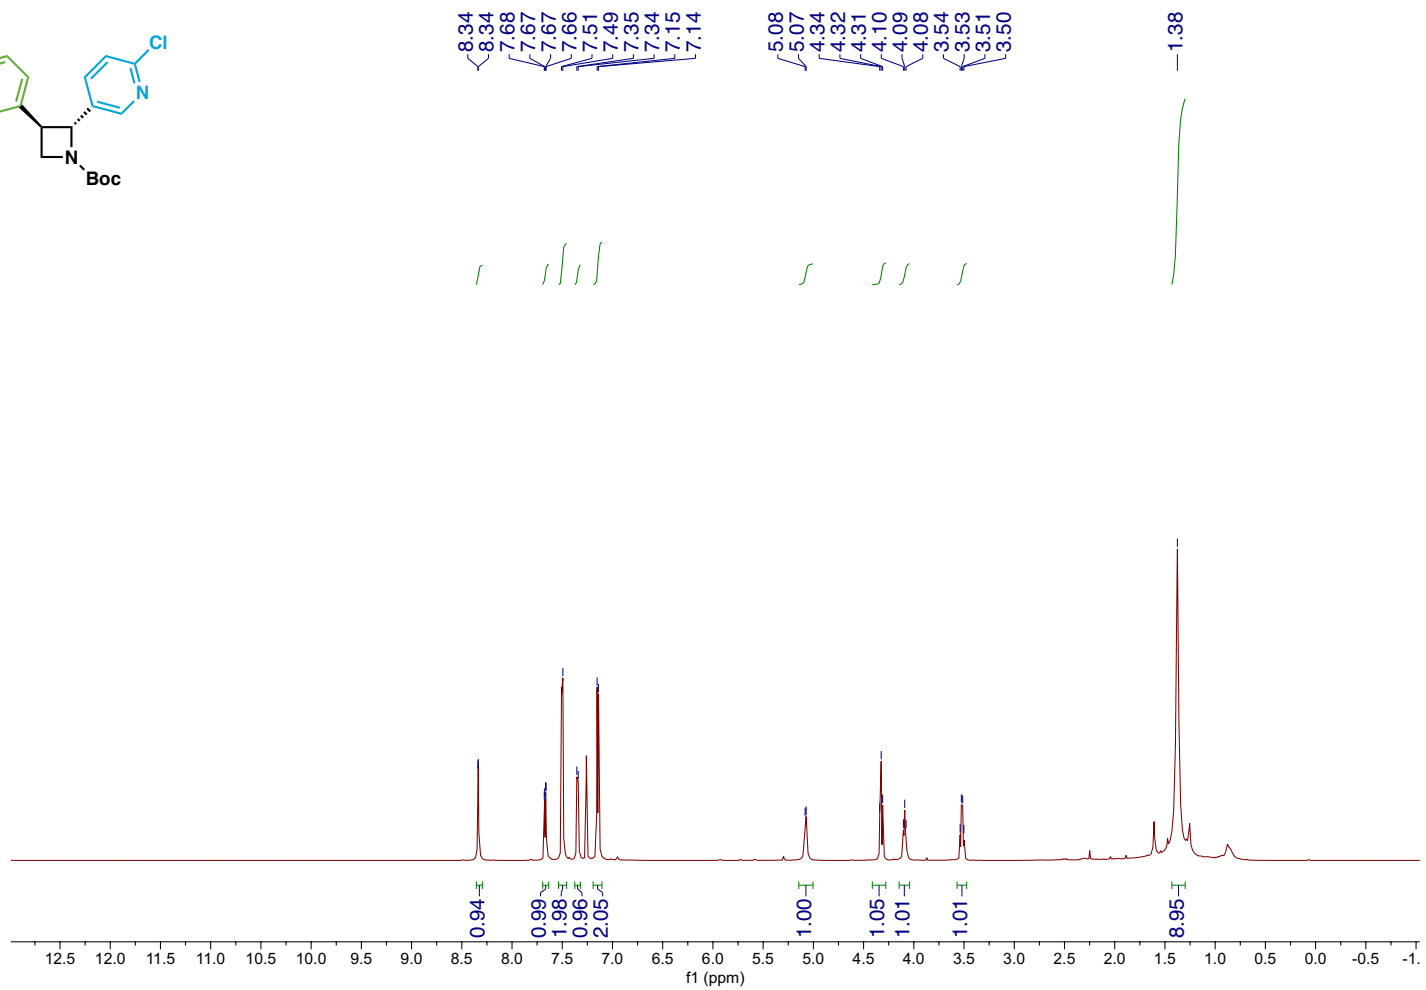

Compound 31 <sup>13</sup>C NMR

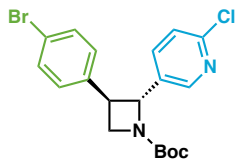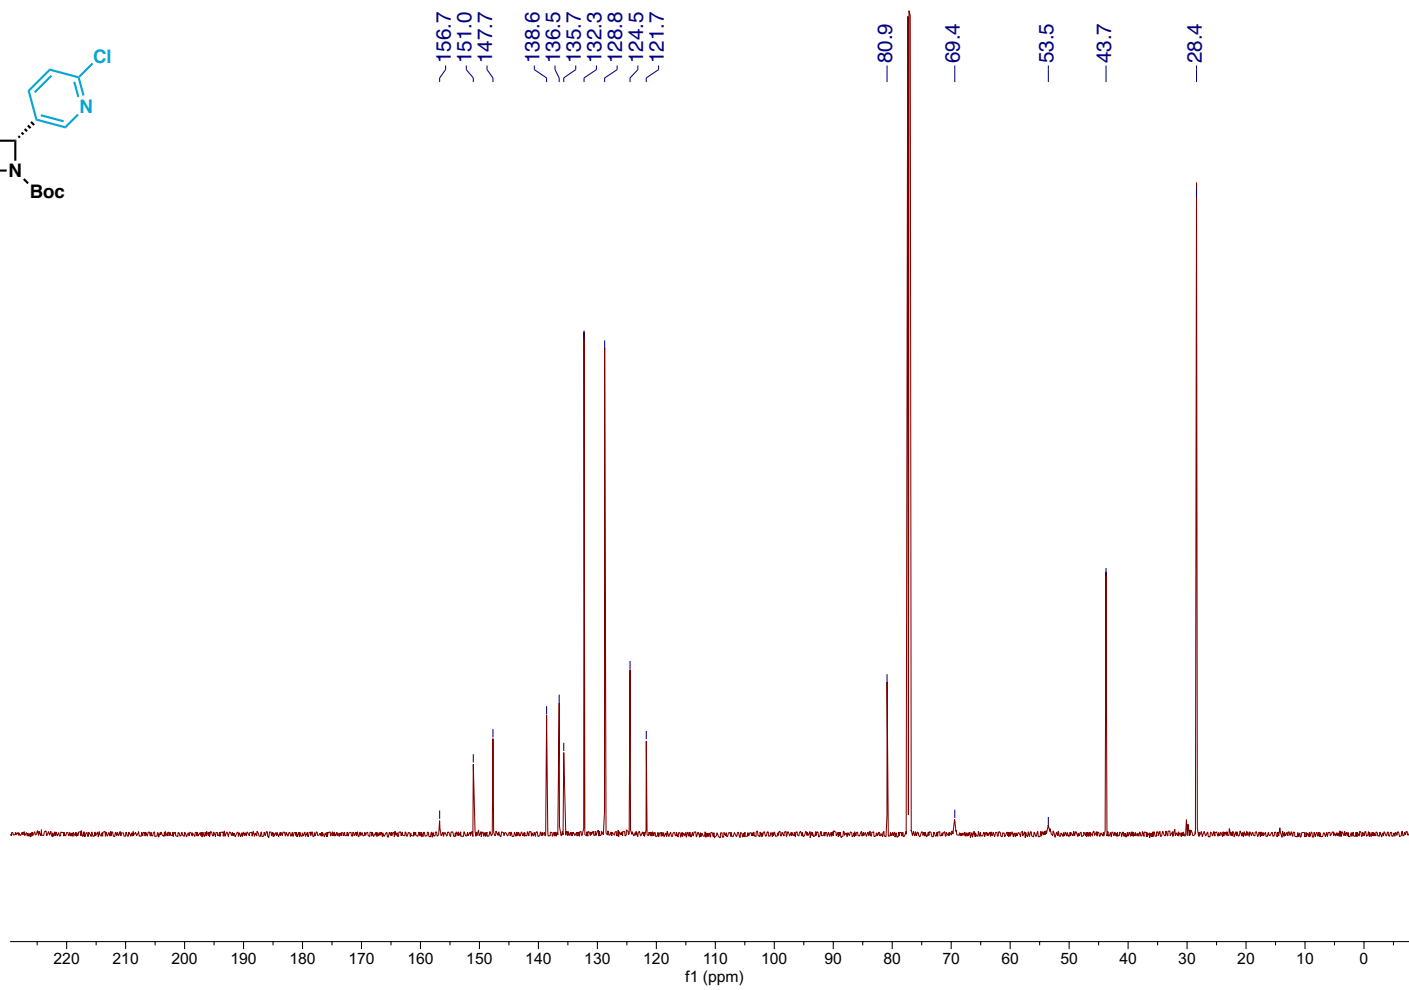

Compound 32 <sup>1</sup>H NMR

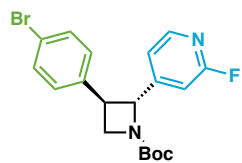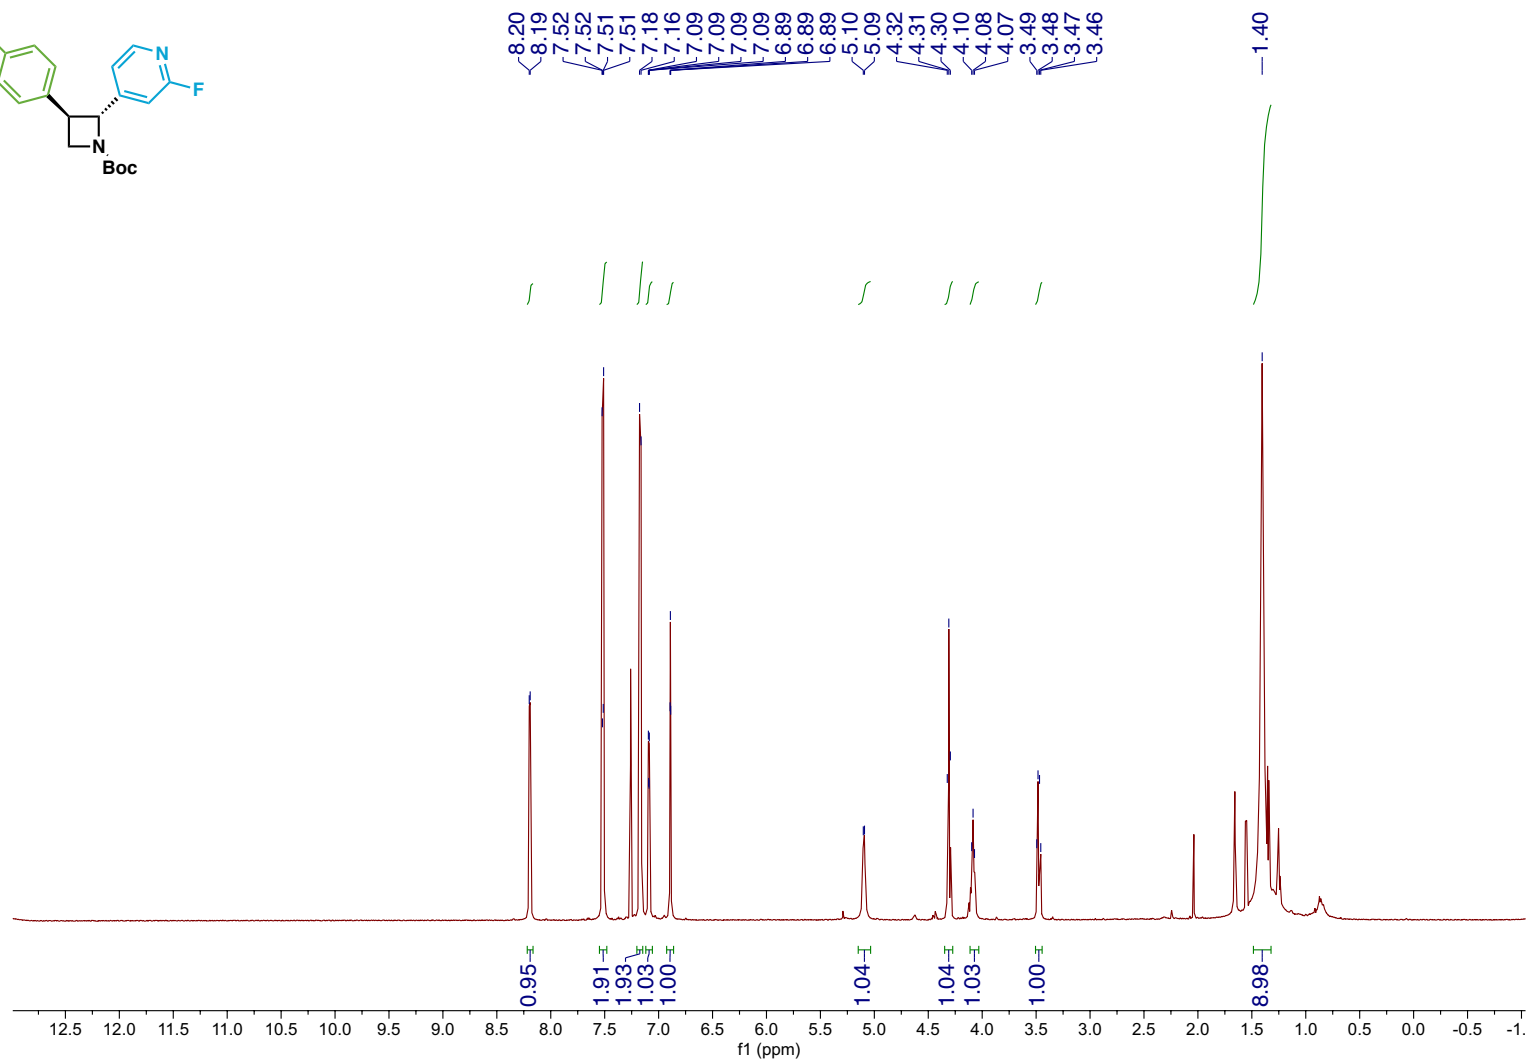

Compound 32 <sup>19</sup>F NMR

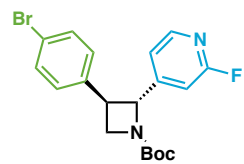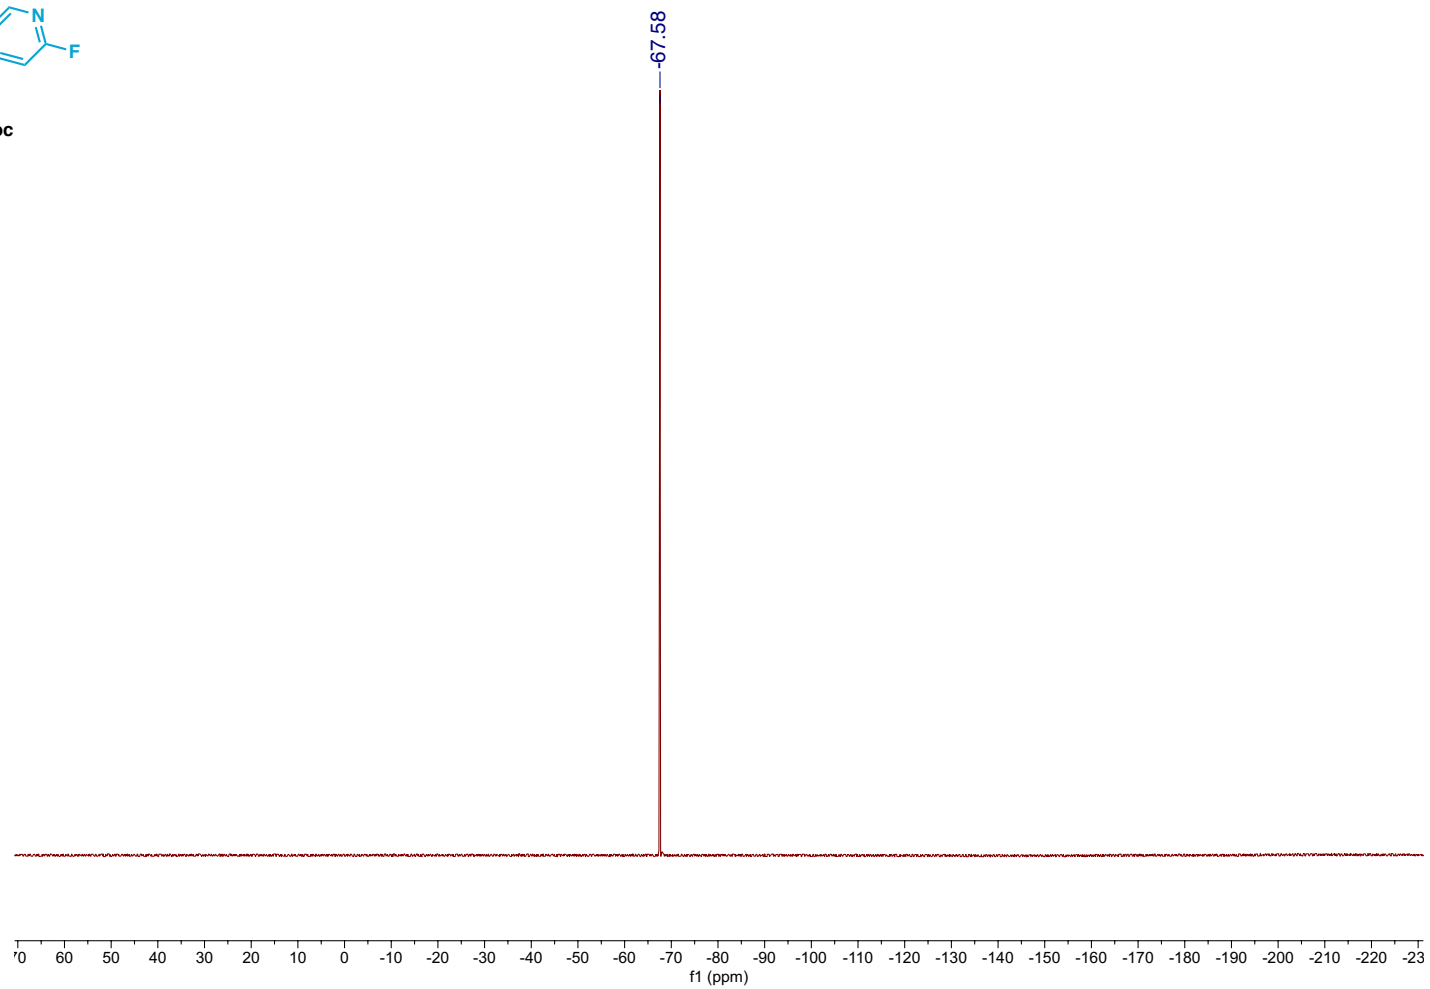



Compound 32 <sup>13</sup>C NMR

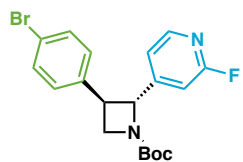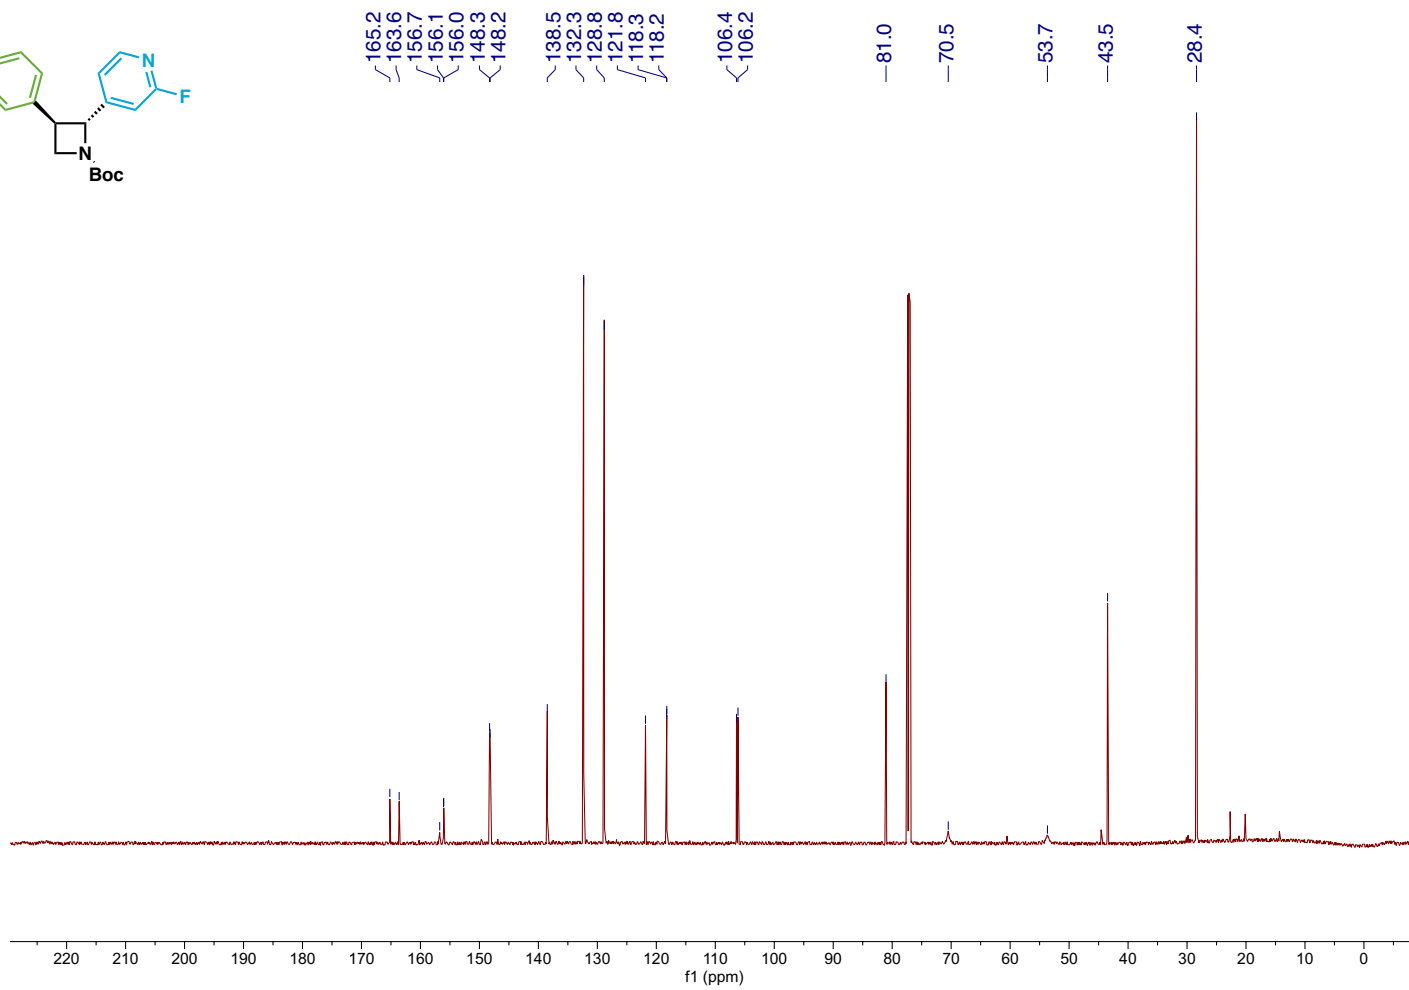

Compound B10 <sup>1</sup>H NMR

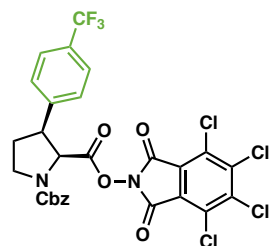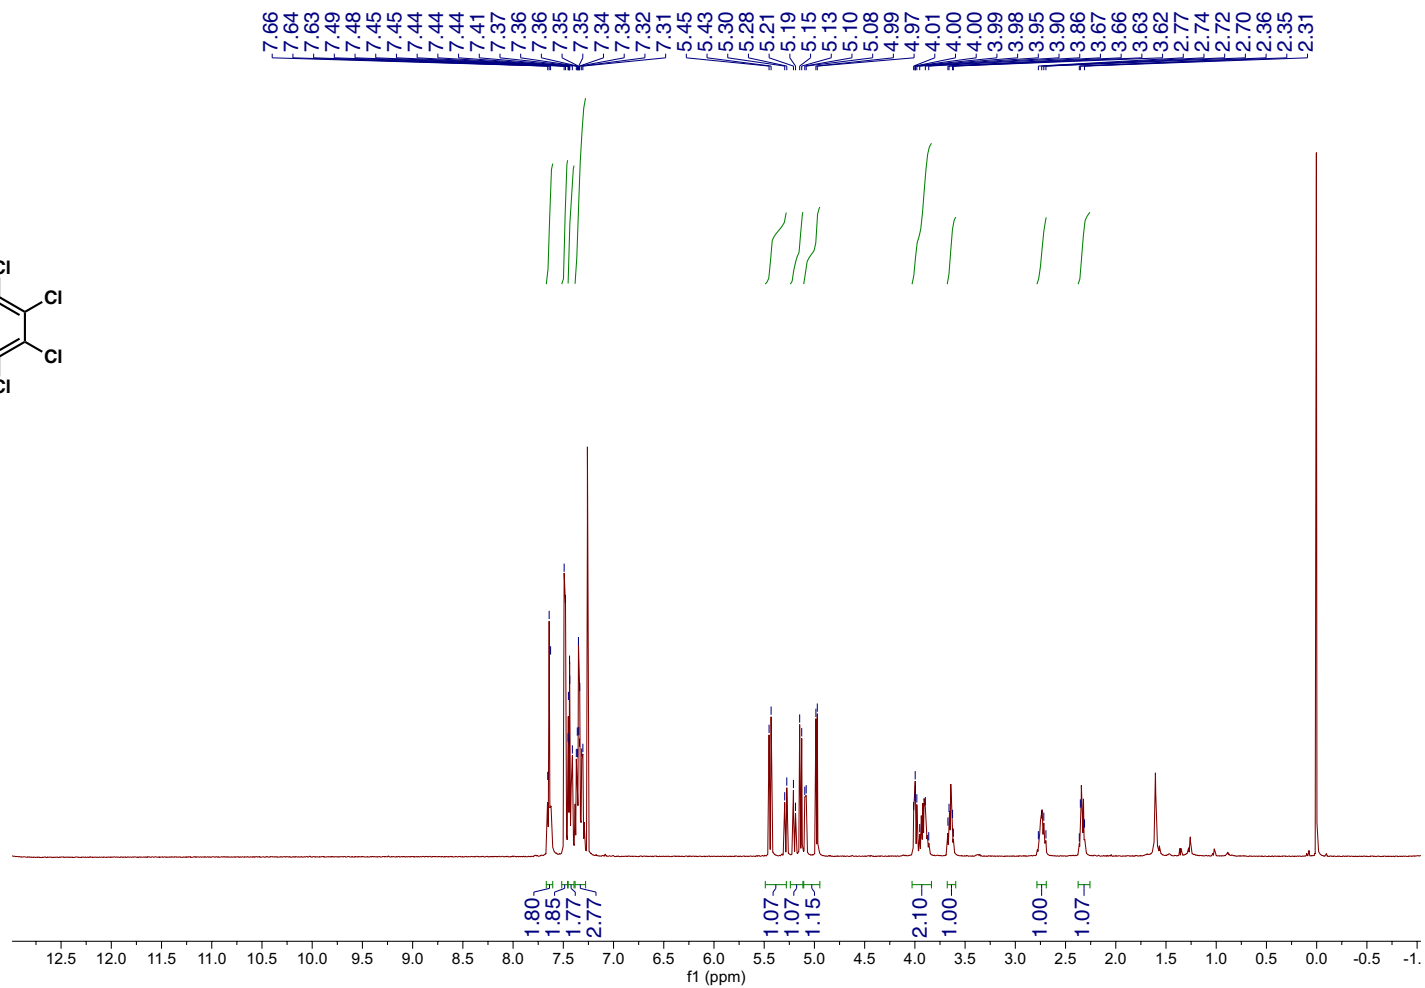

Compound B10 19F NMR

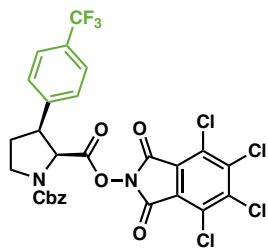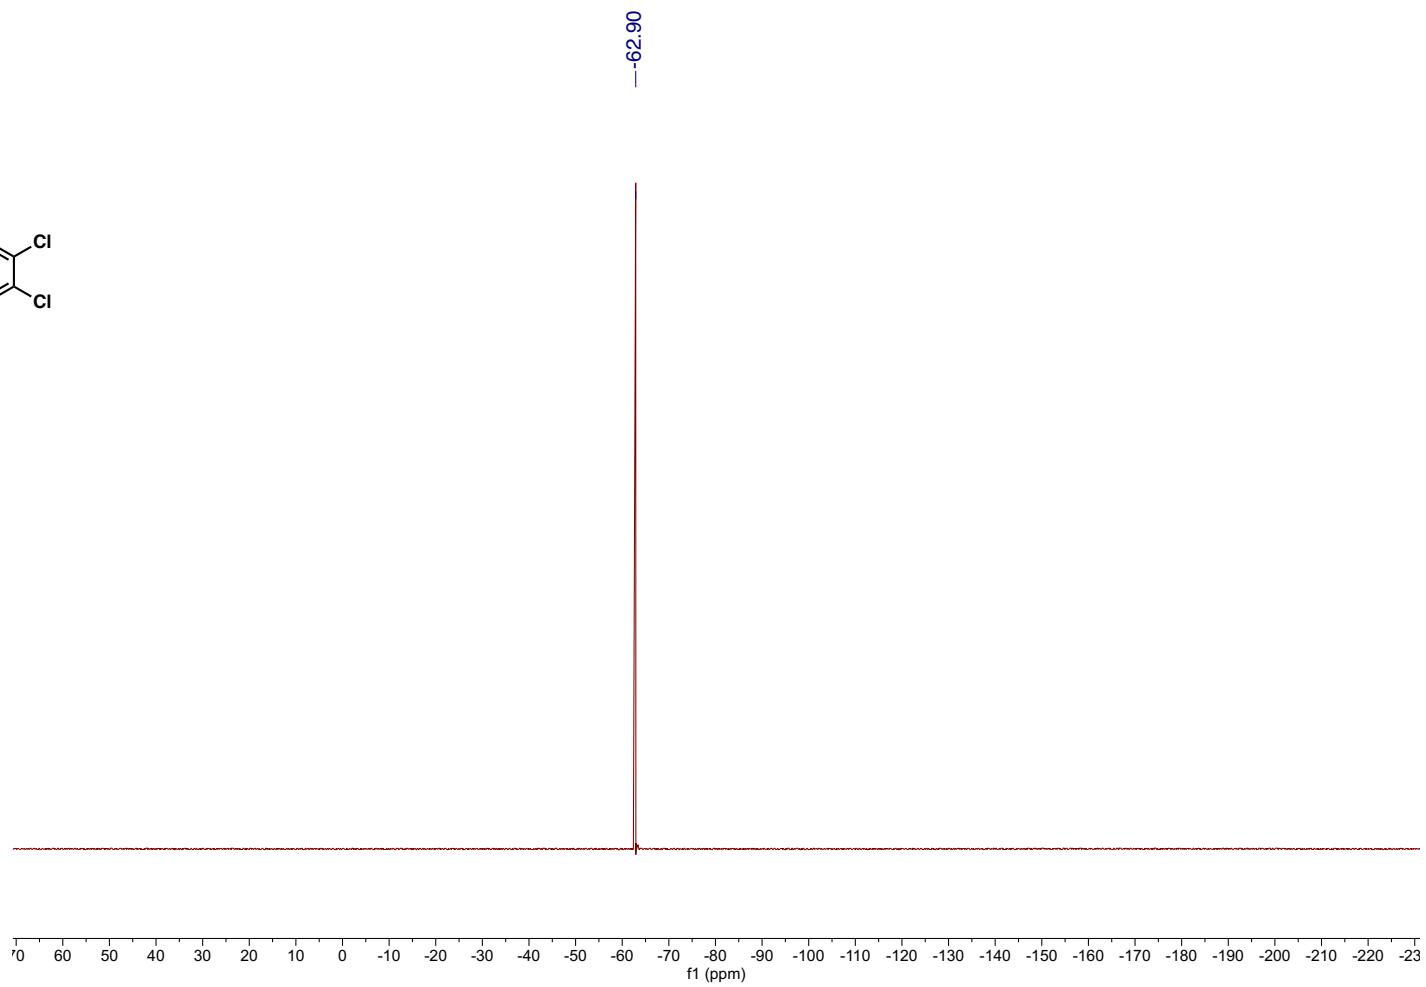

Compound B10 <sup>13</sup>C NMR

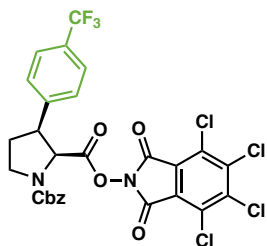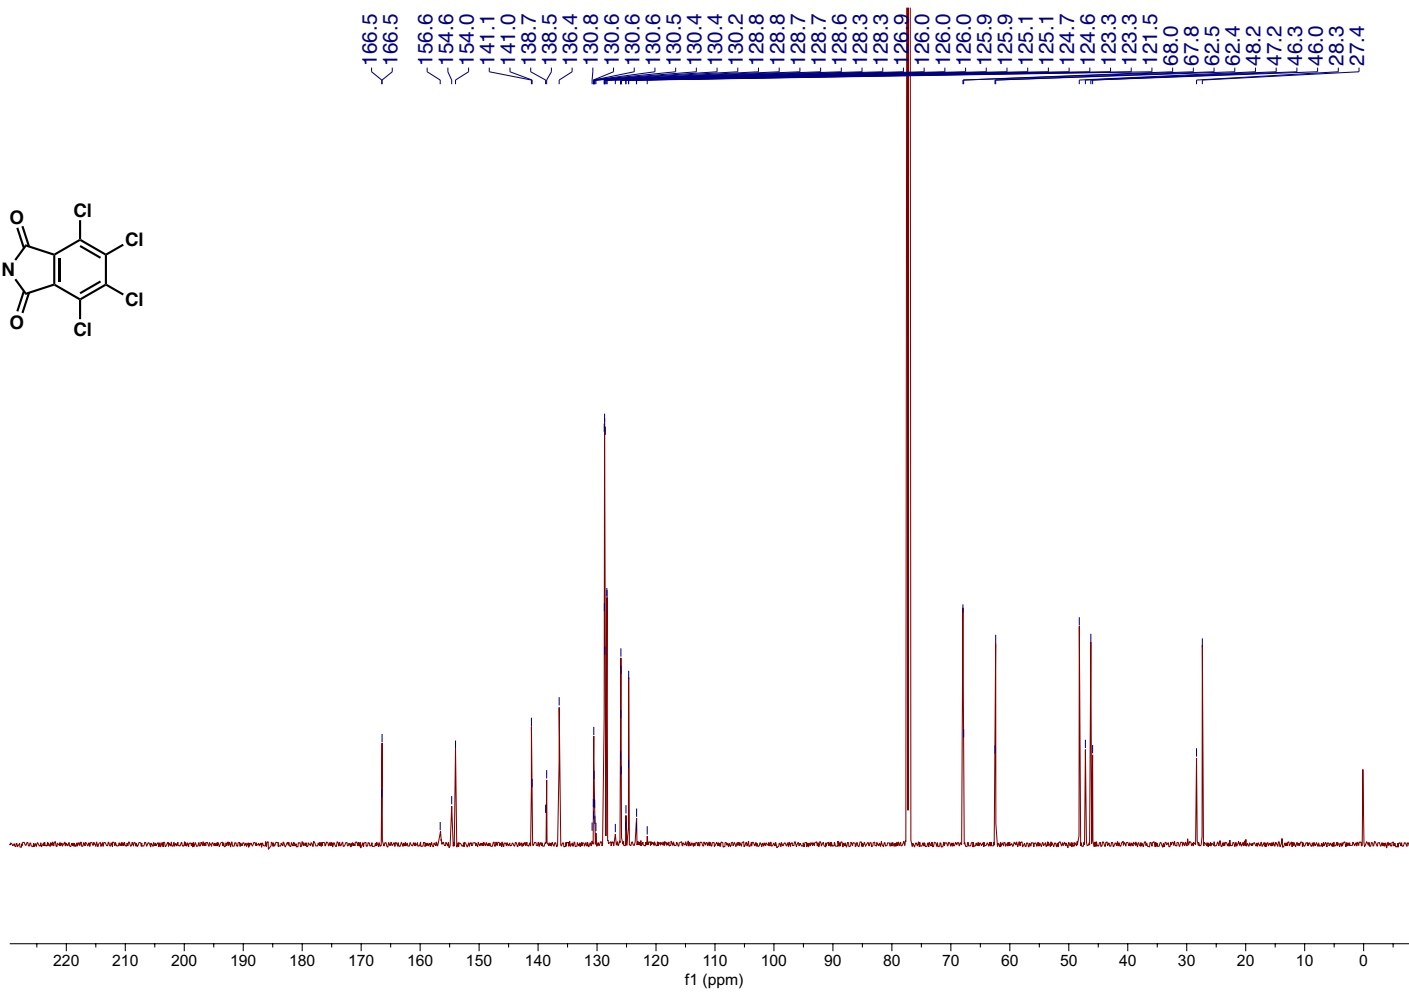

Compound 33 <sup>1</sup>H NMR

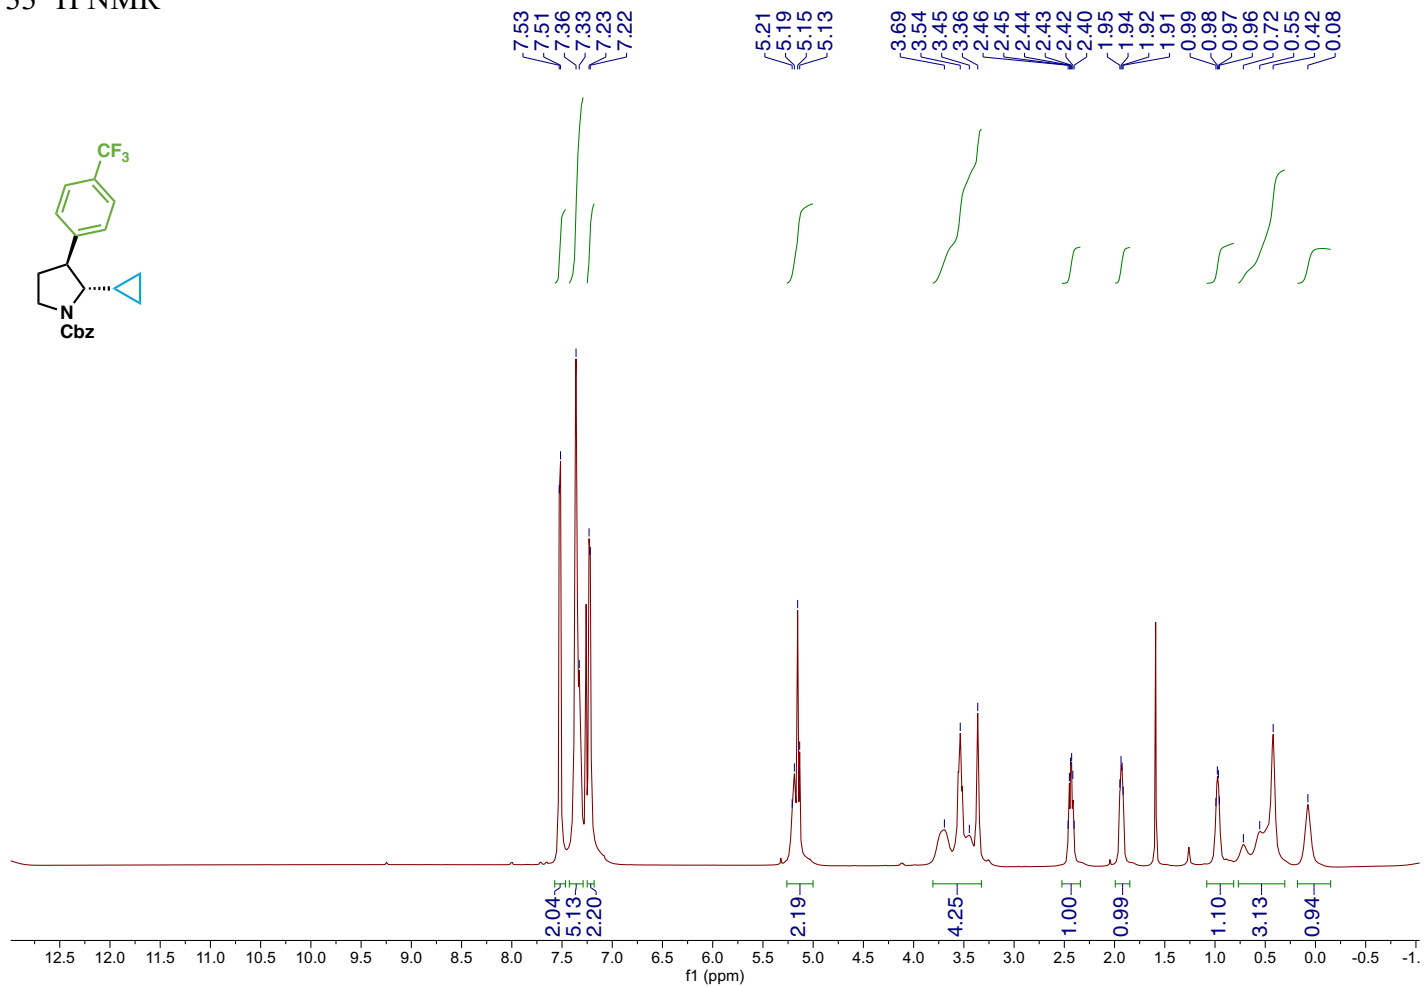

Compound 33  $^{19}\text{F}$  NMR

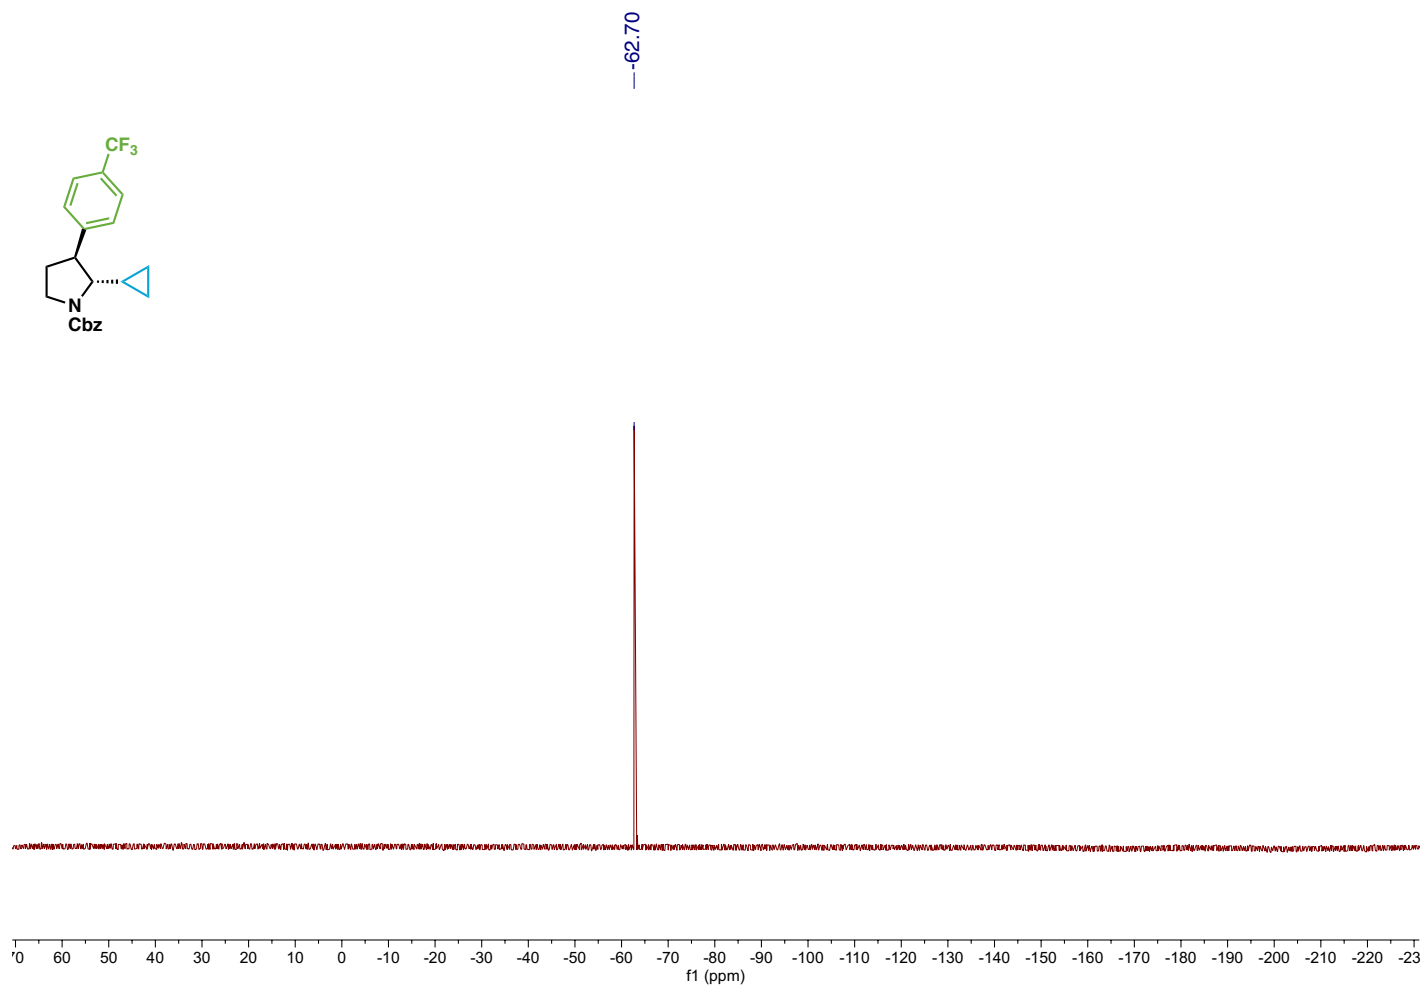

Compound 33 <sup>13</sup>C NMR

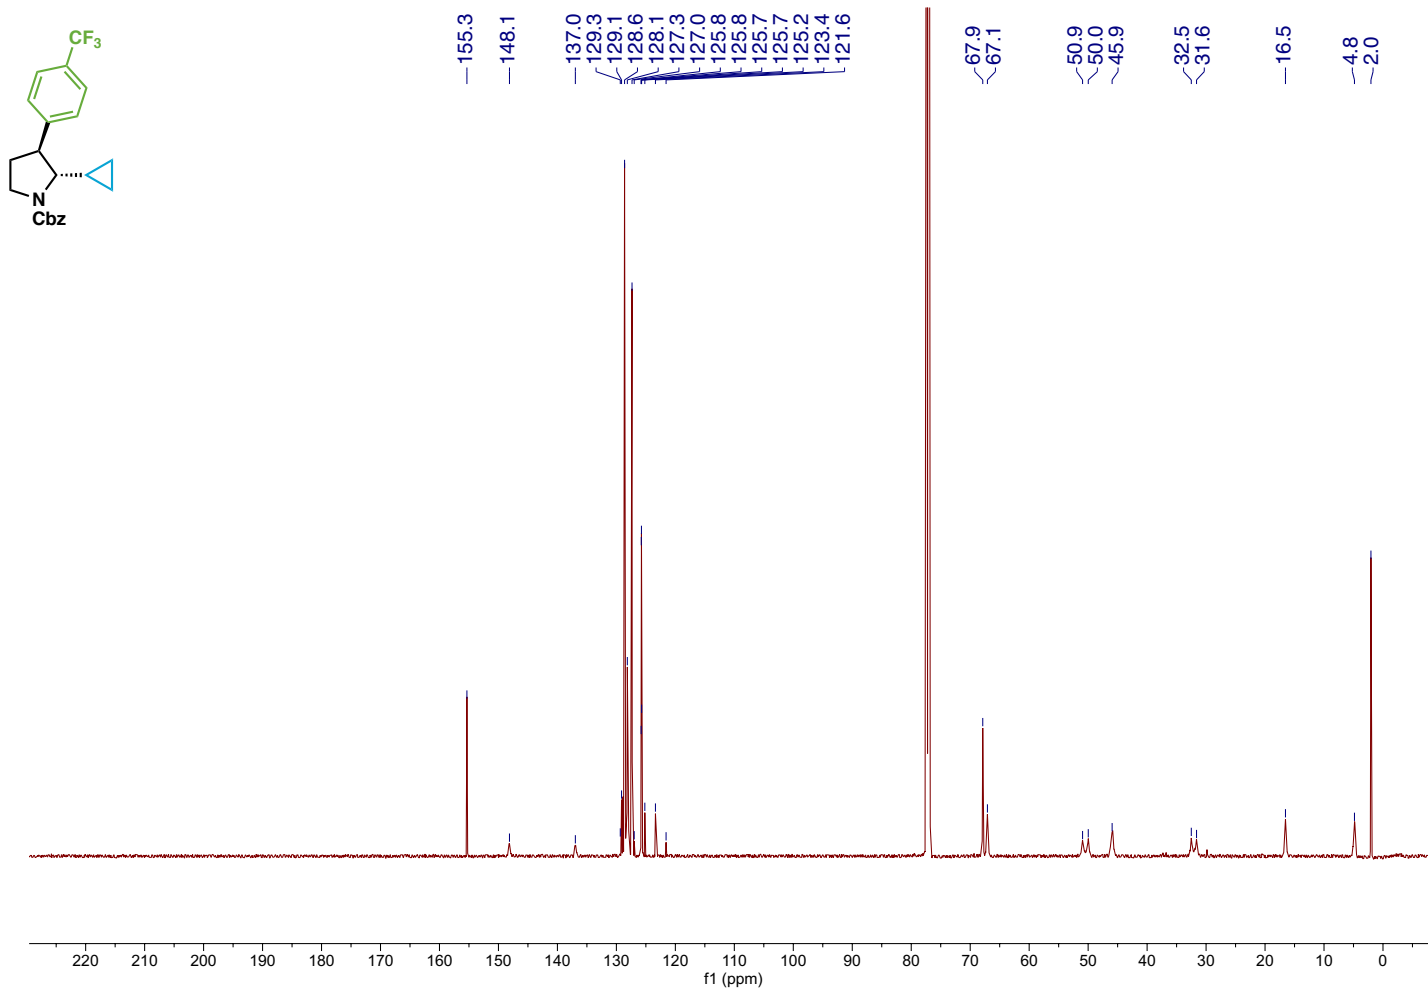

Compound 34 <sup>1</sup>H NMR

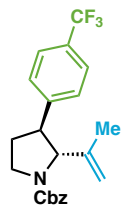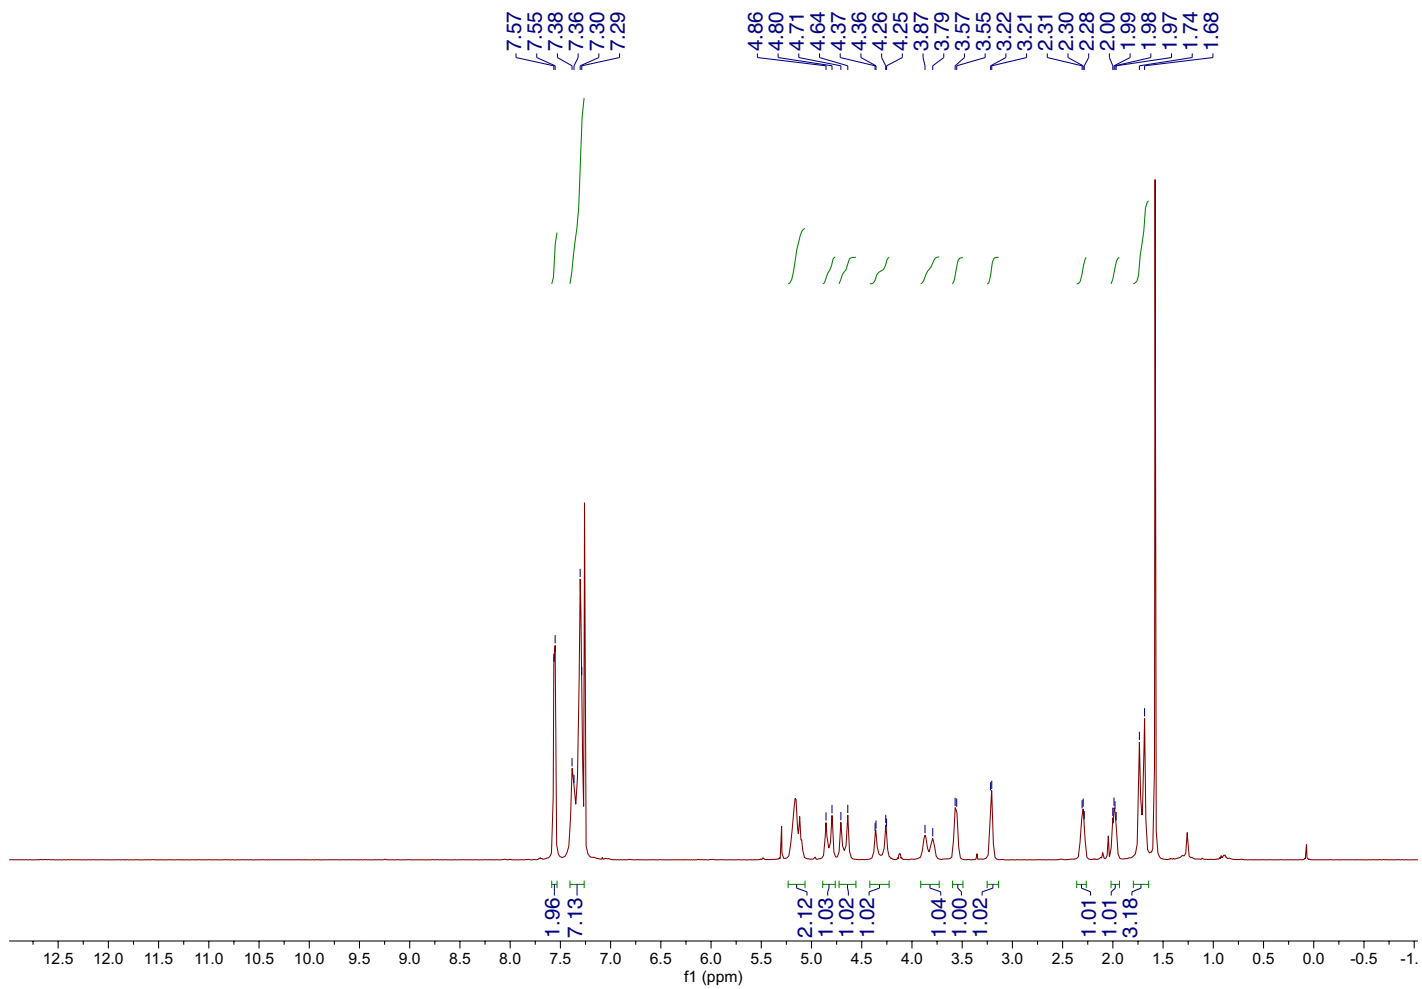



Compound 34  $^{19}\text{F}$  NMR

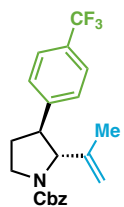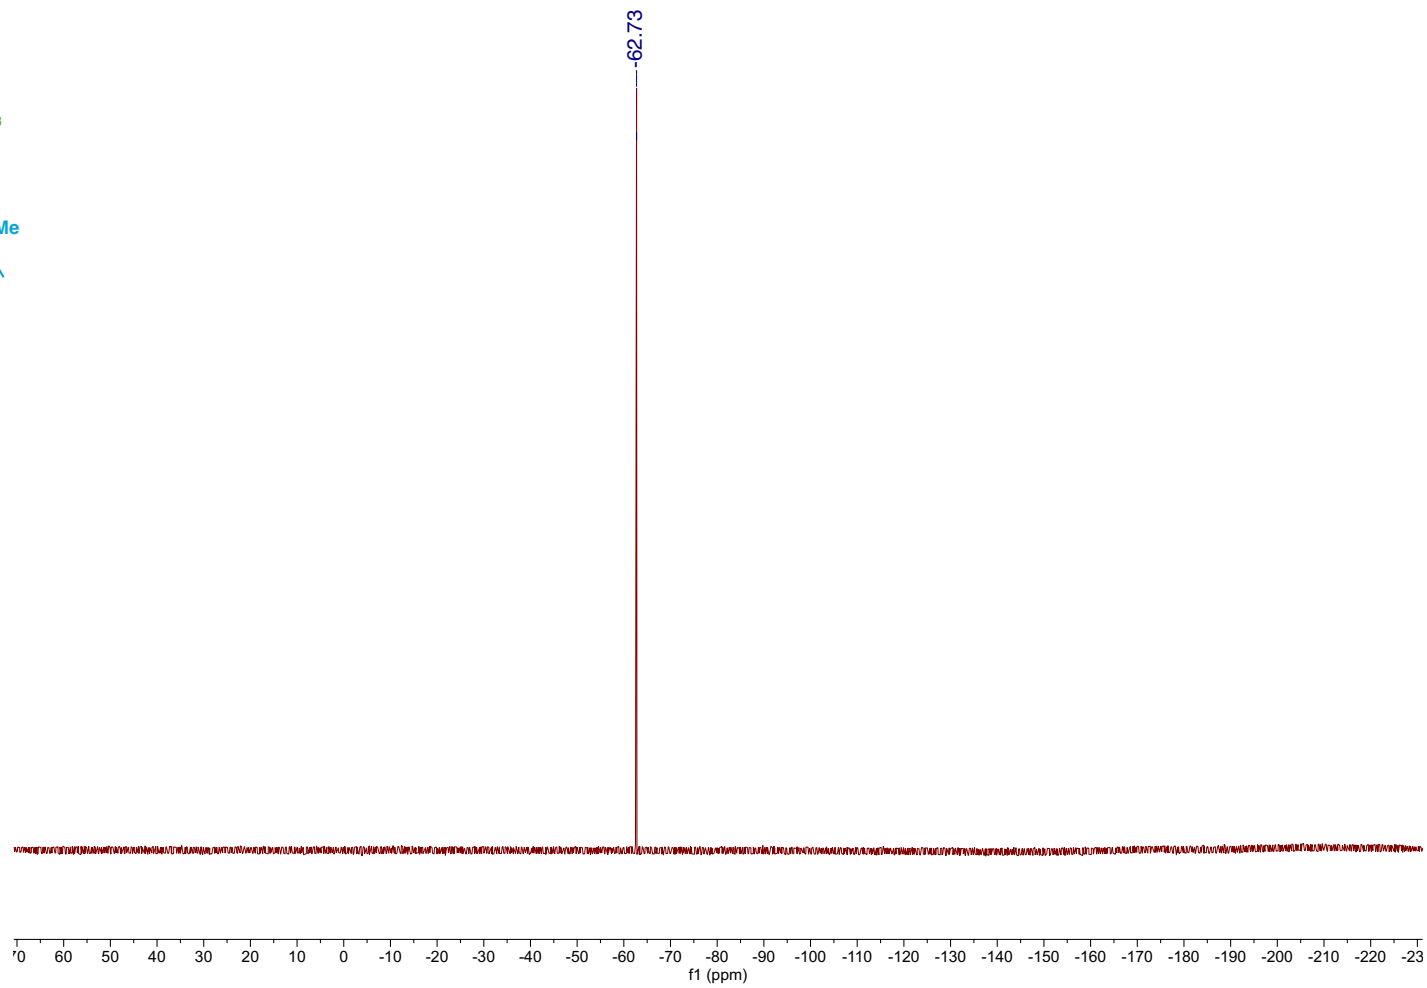

Compound 34 <sup>13</sup>C NMR

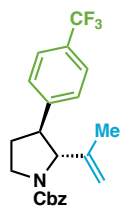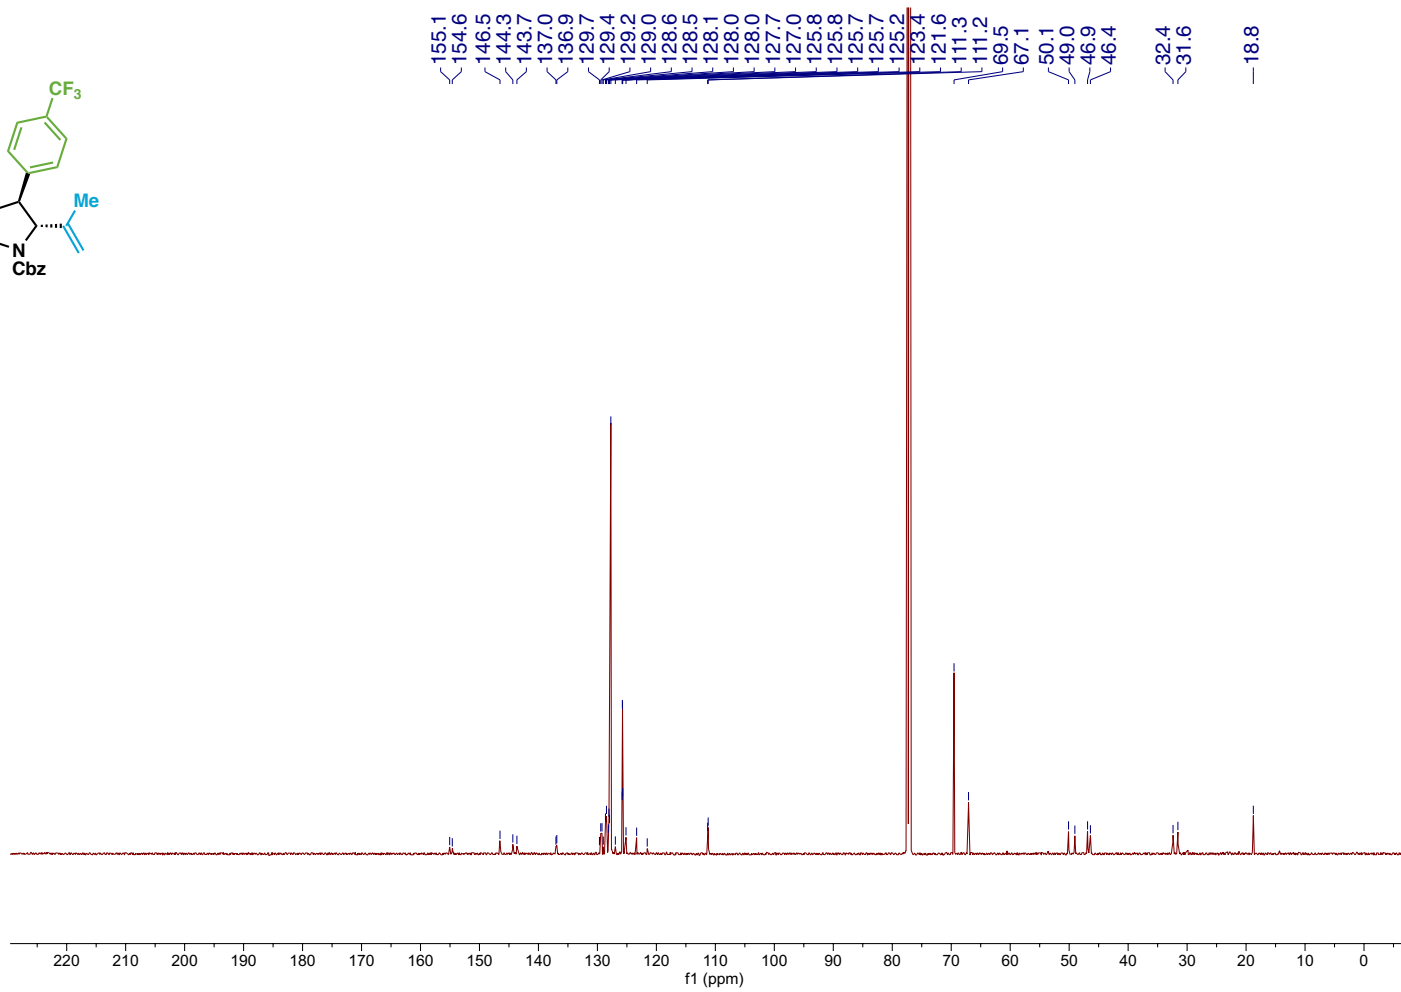

Compound 35  $^1\text{H}$  NMR

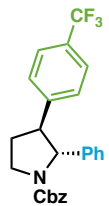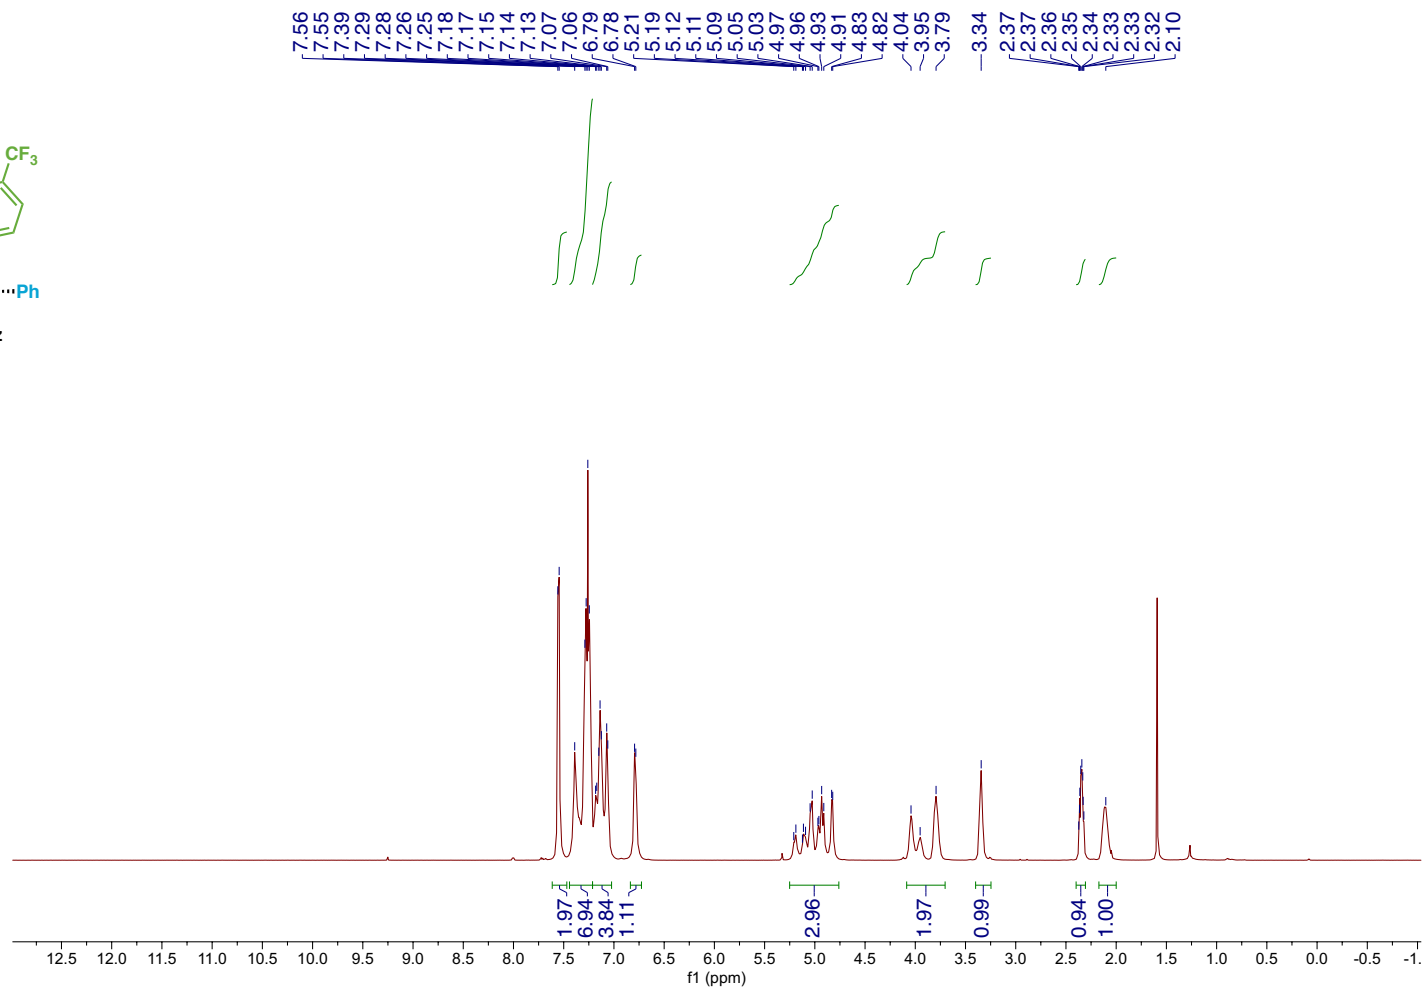

Compound 35 <sup>19</sup>F NMR

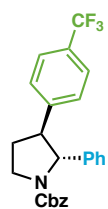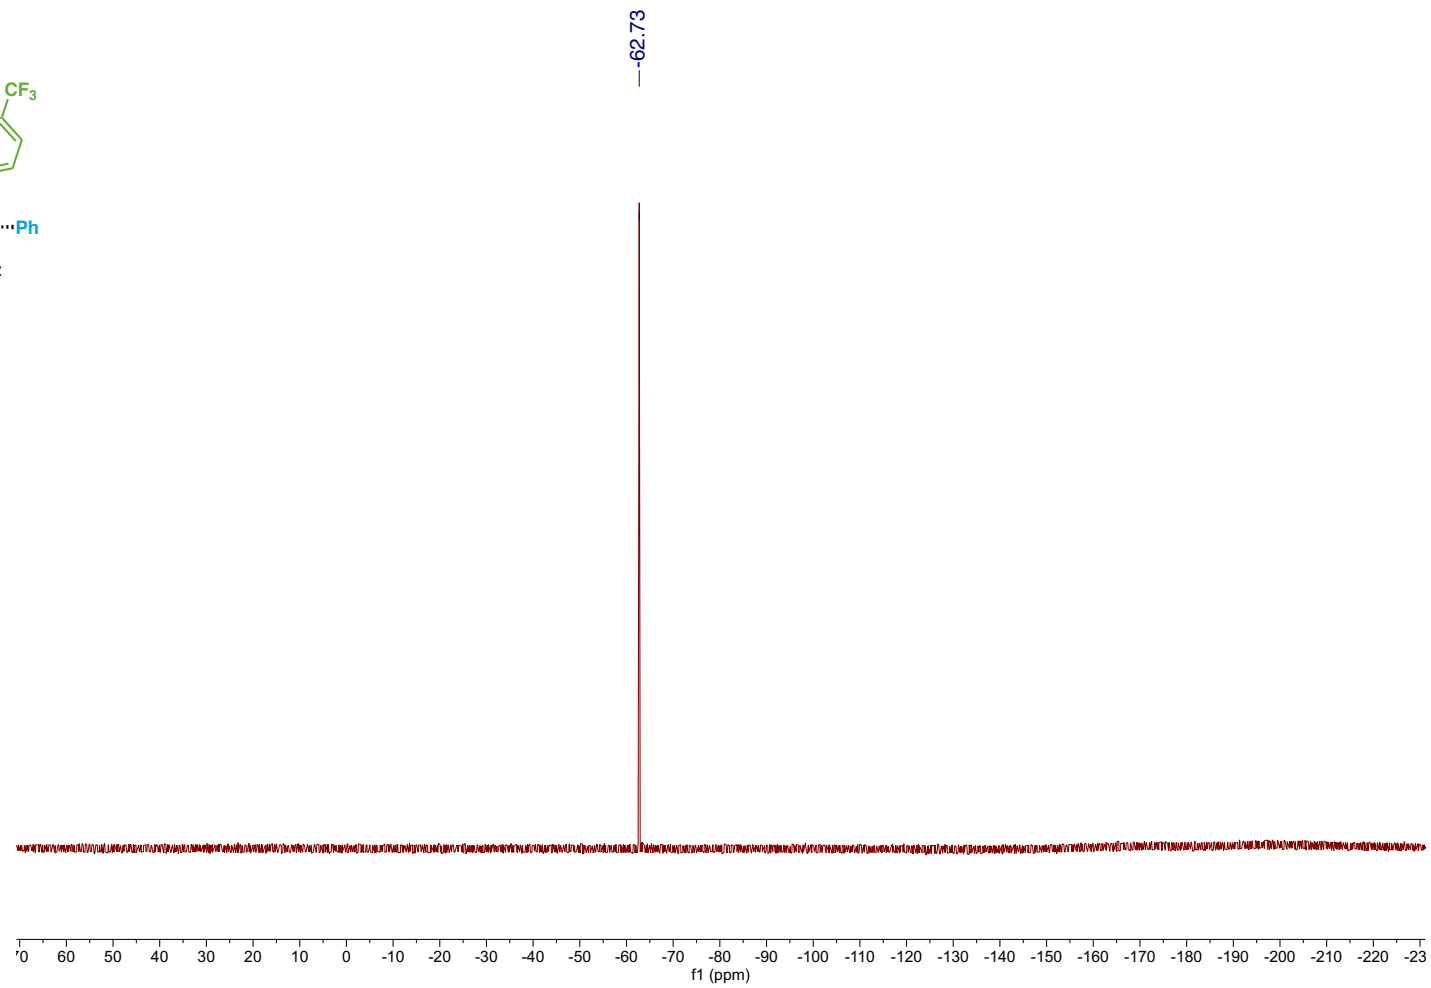

Compound 35 <sup>13</sup>C NMR

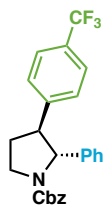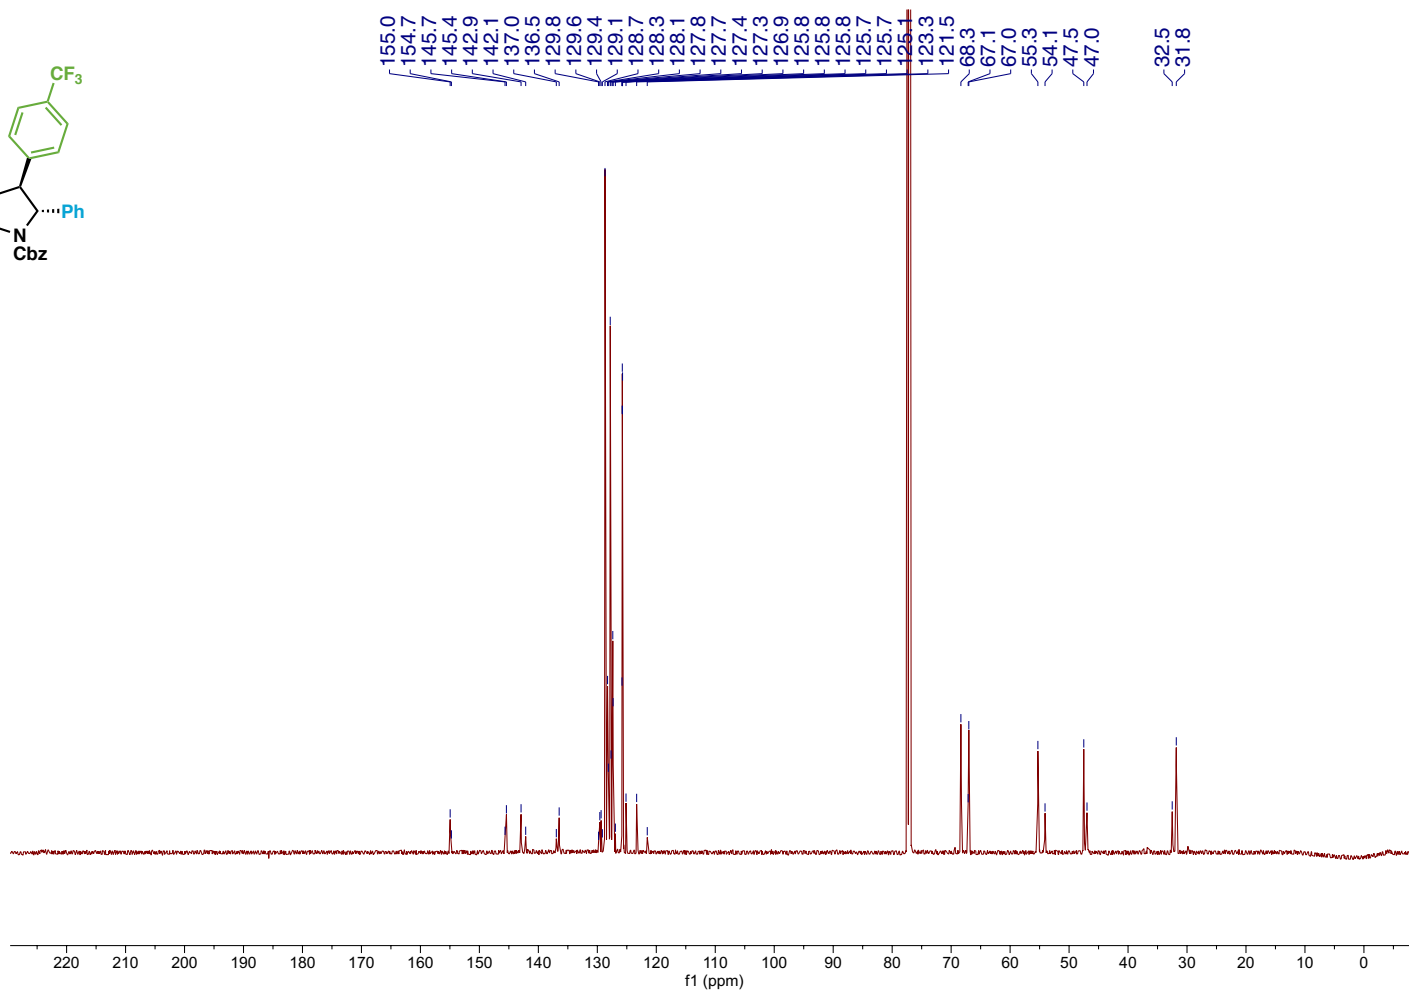

Compound 36 <sup>1</sup>H NMR

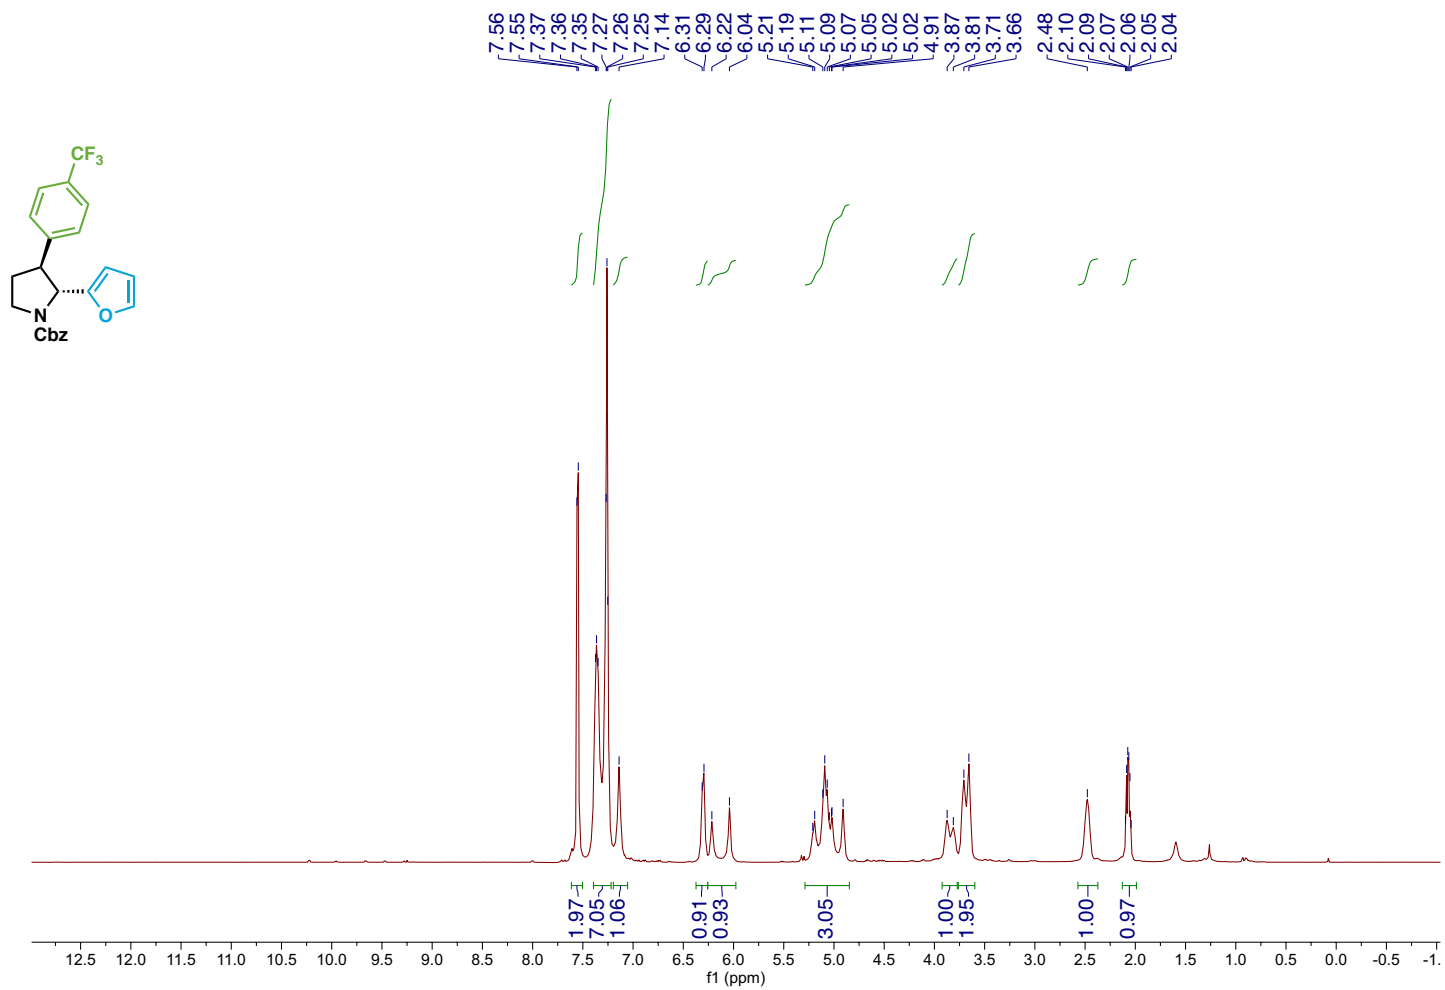

Compound 36  $^{19}\text{F}$  NMR

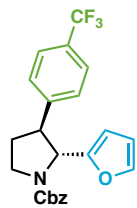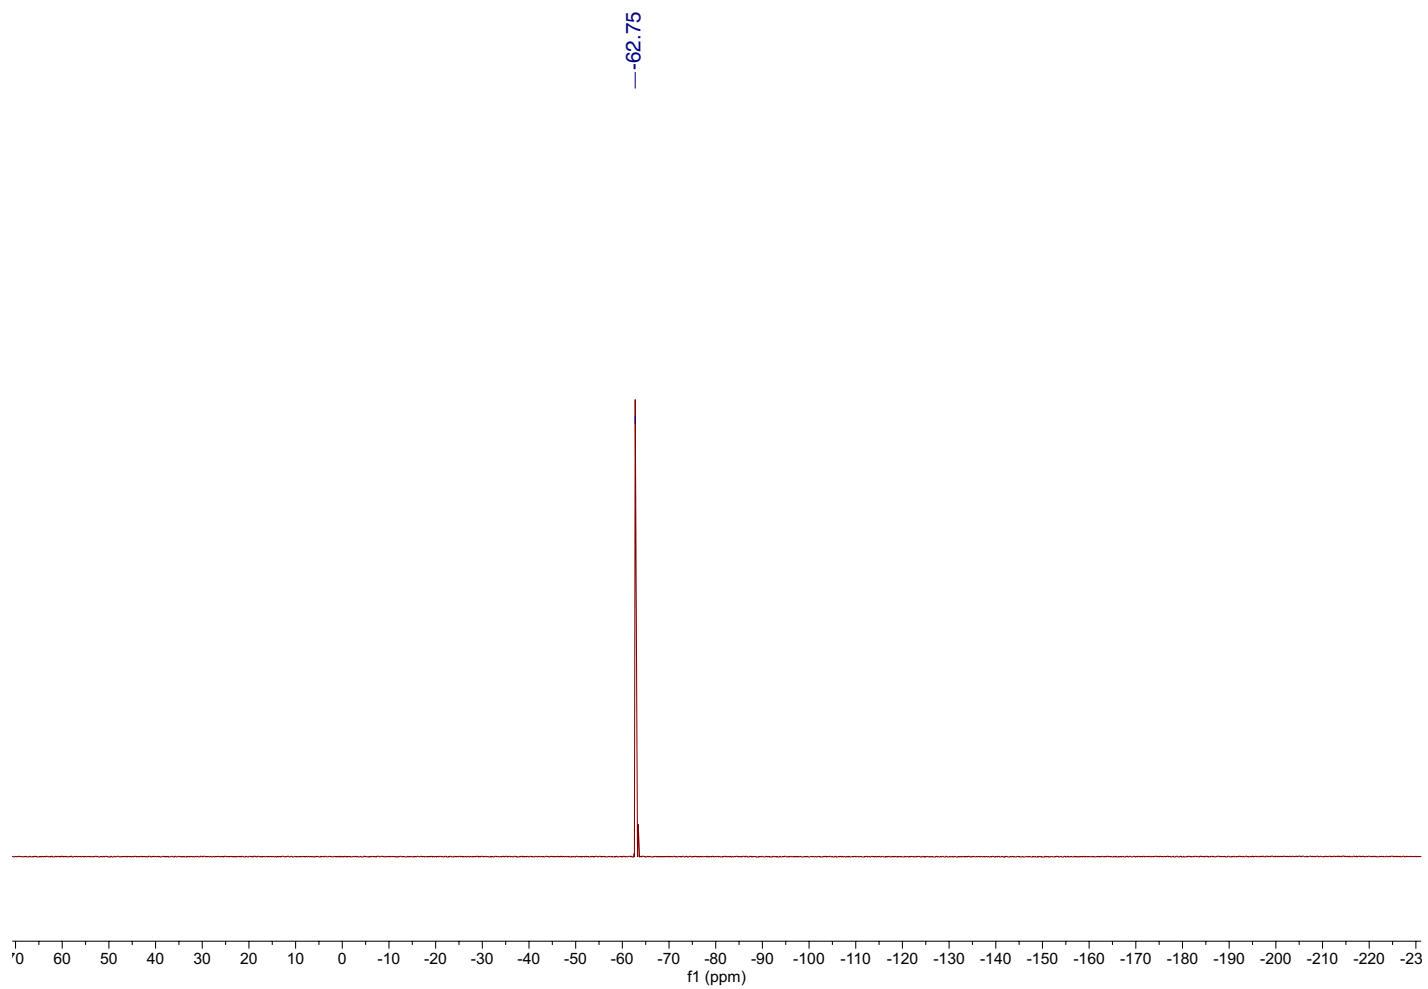

Compound 36 <sup>13</sup>C NMR

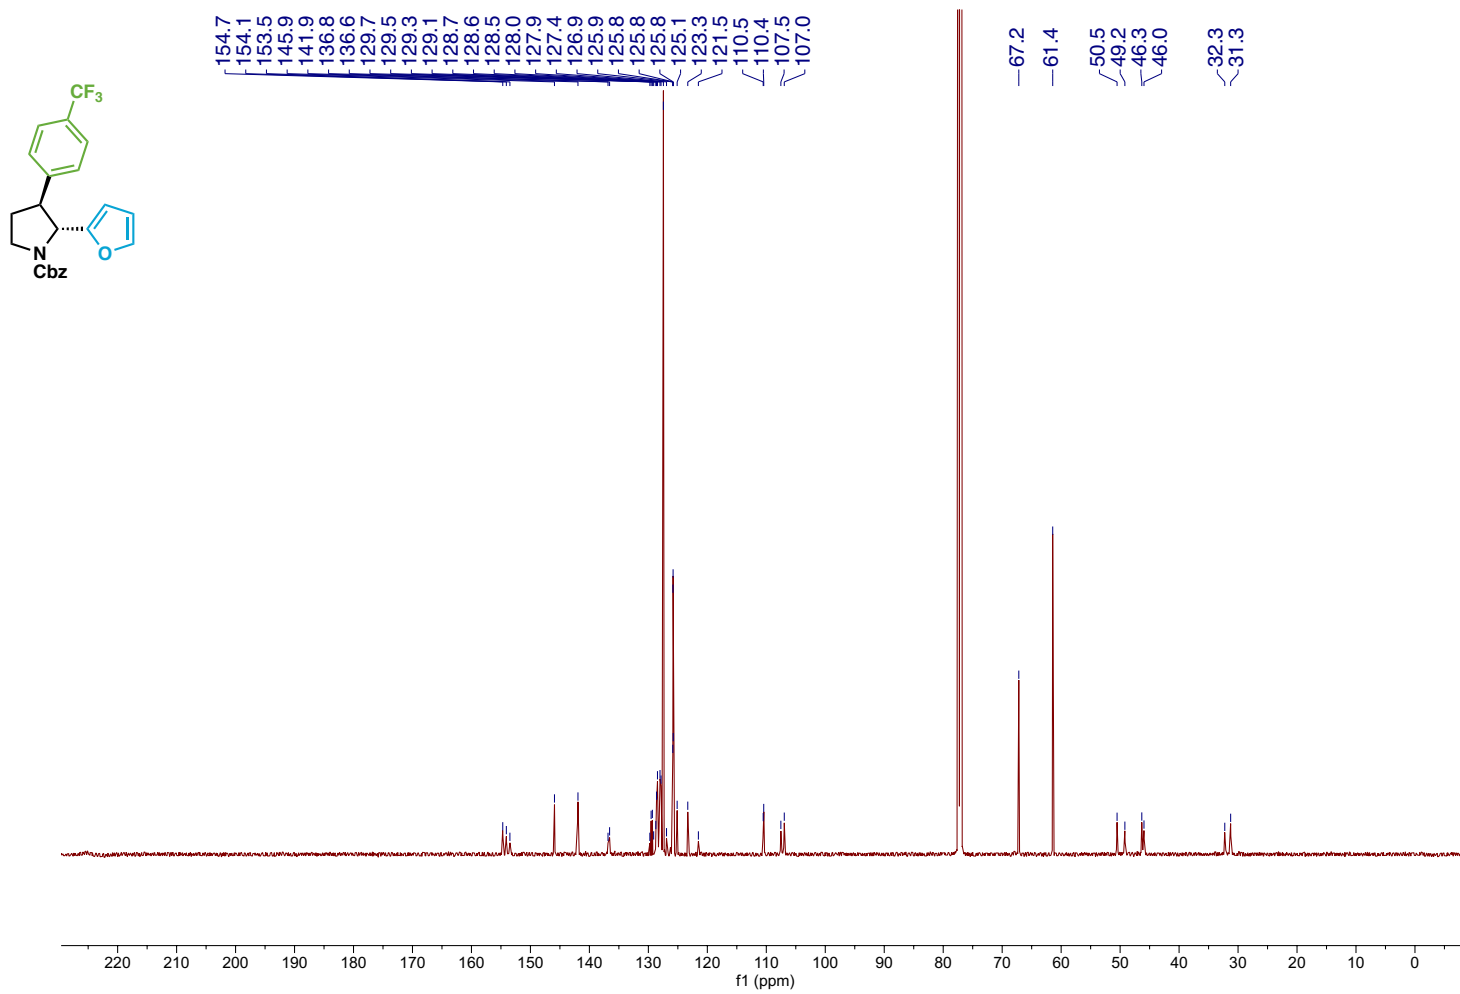



Compound 37 <sup>1</sup>H NMR

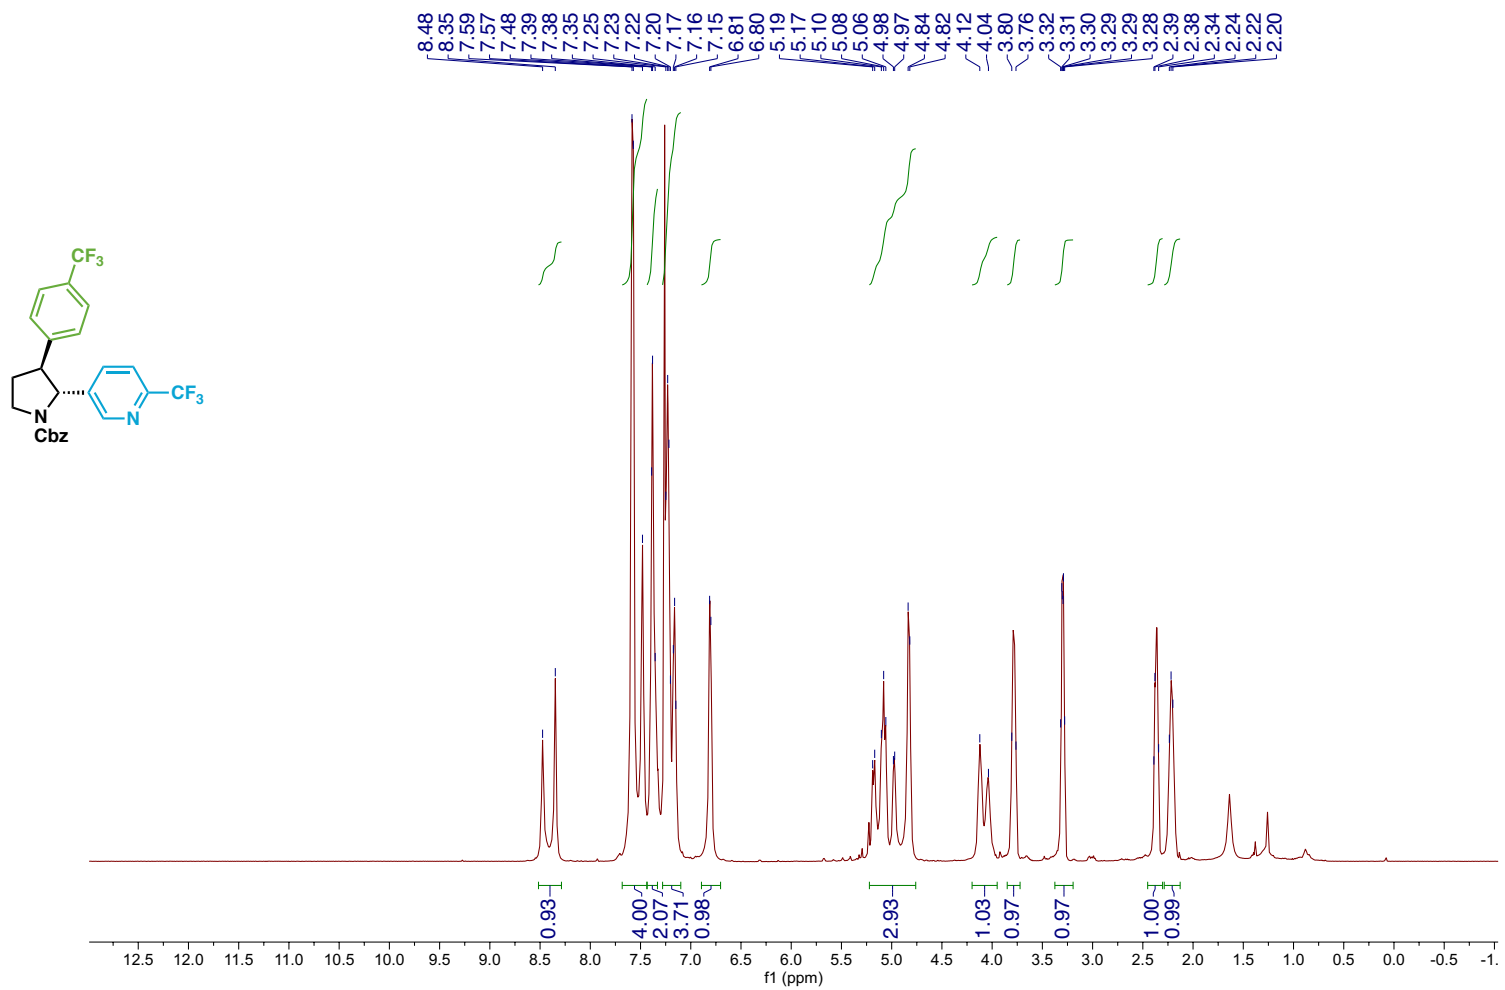

Compound 37 <sup>19</sup>F NMR

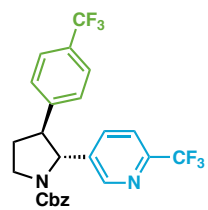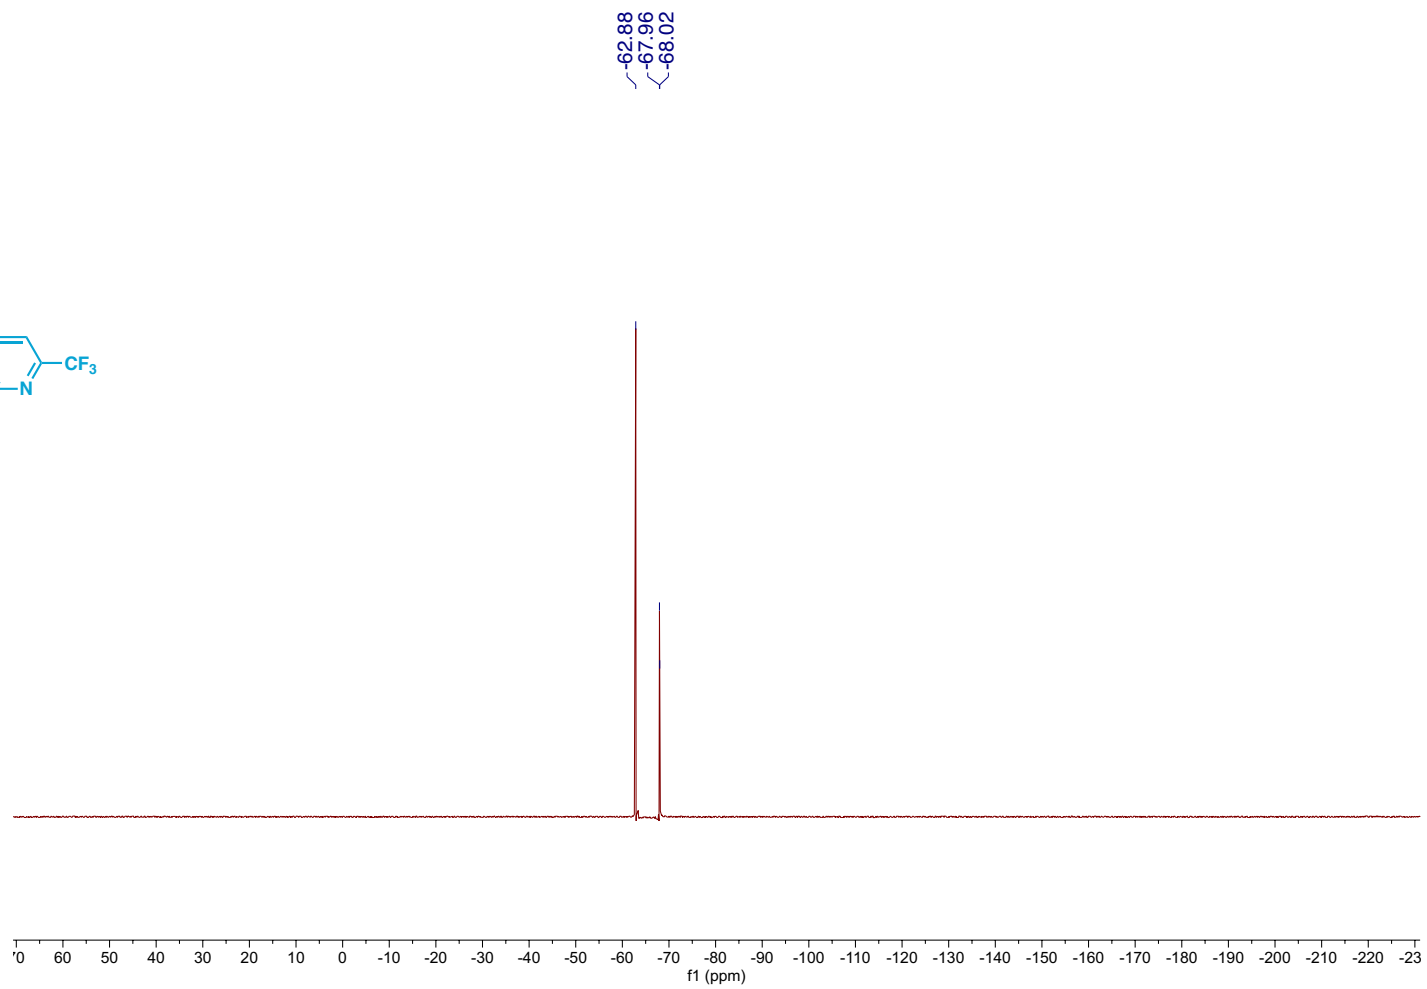

Compound 37 <sup>13</sup>C NMR

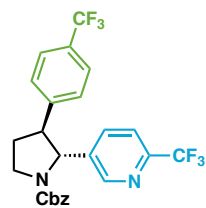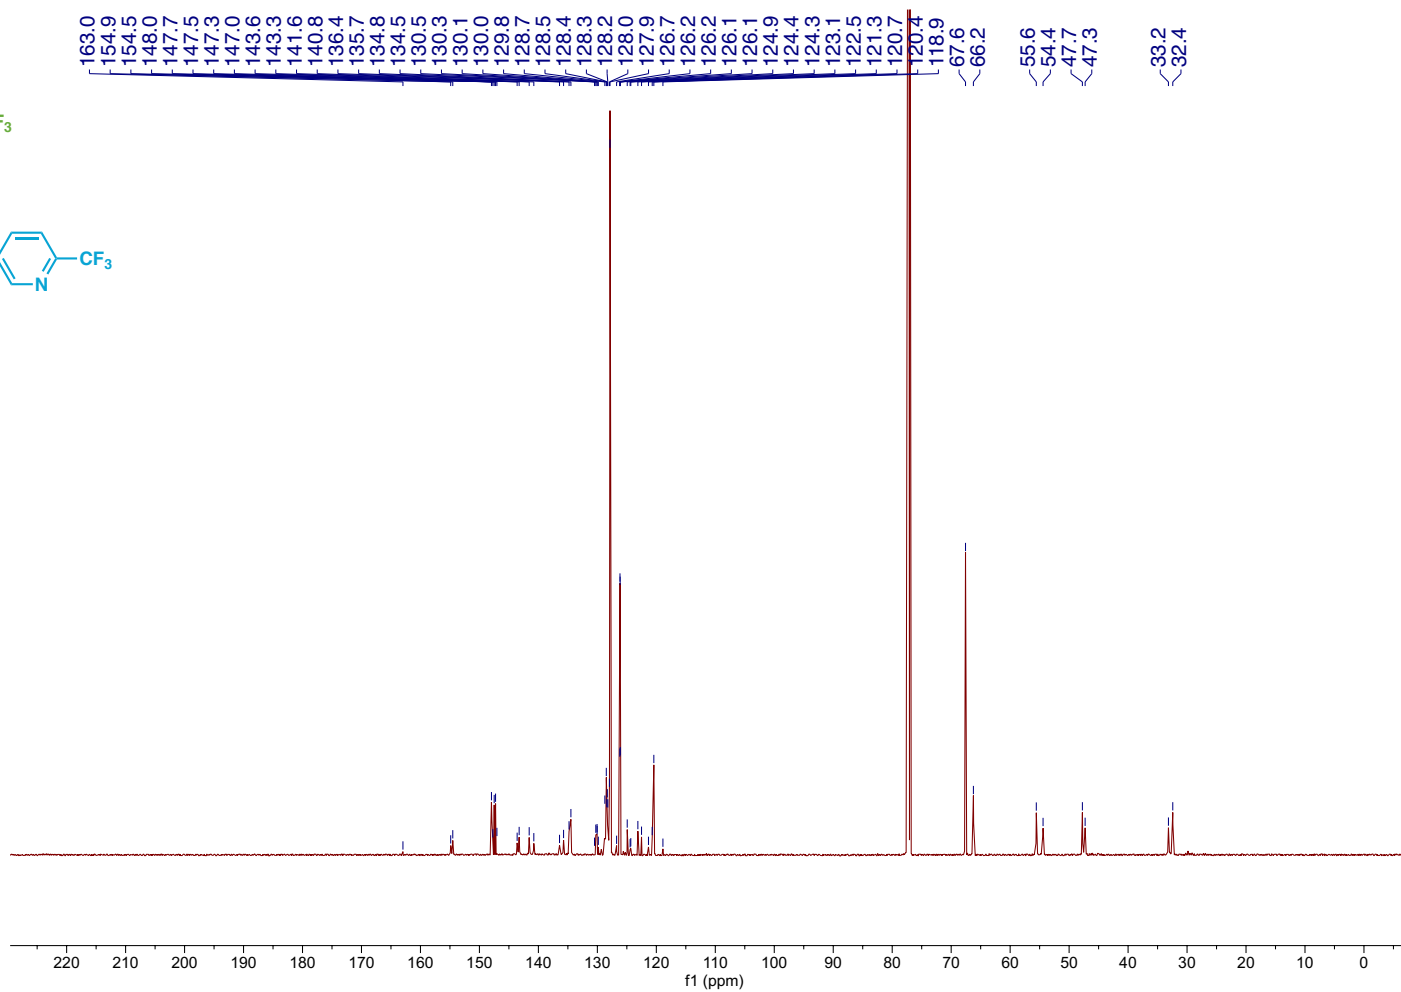

Compound 38 <sup>1</sup>H NMR

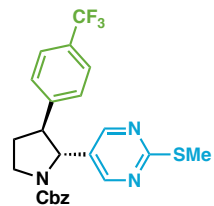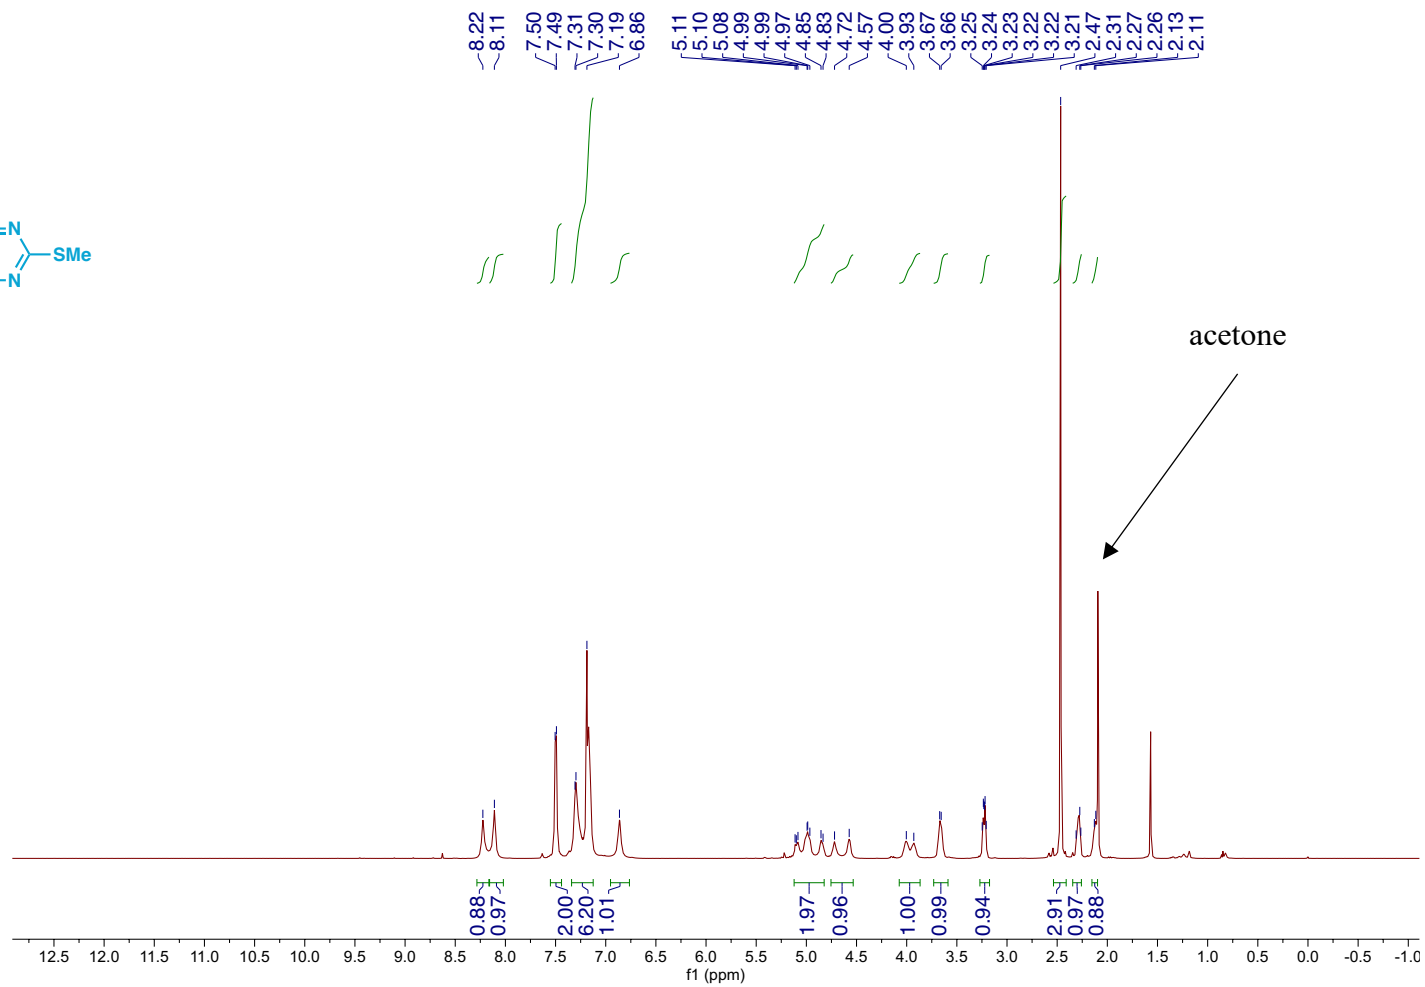

Compound 38  $^{19}\text{F}$  NMR

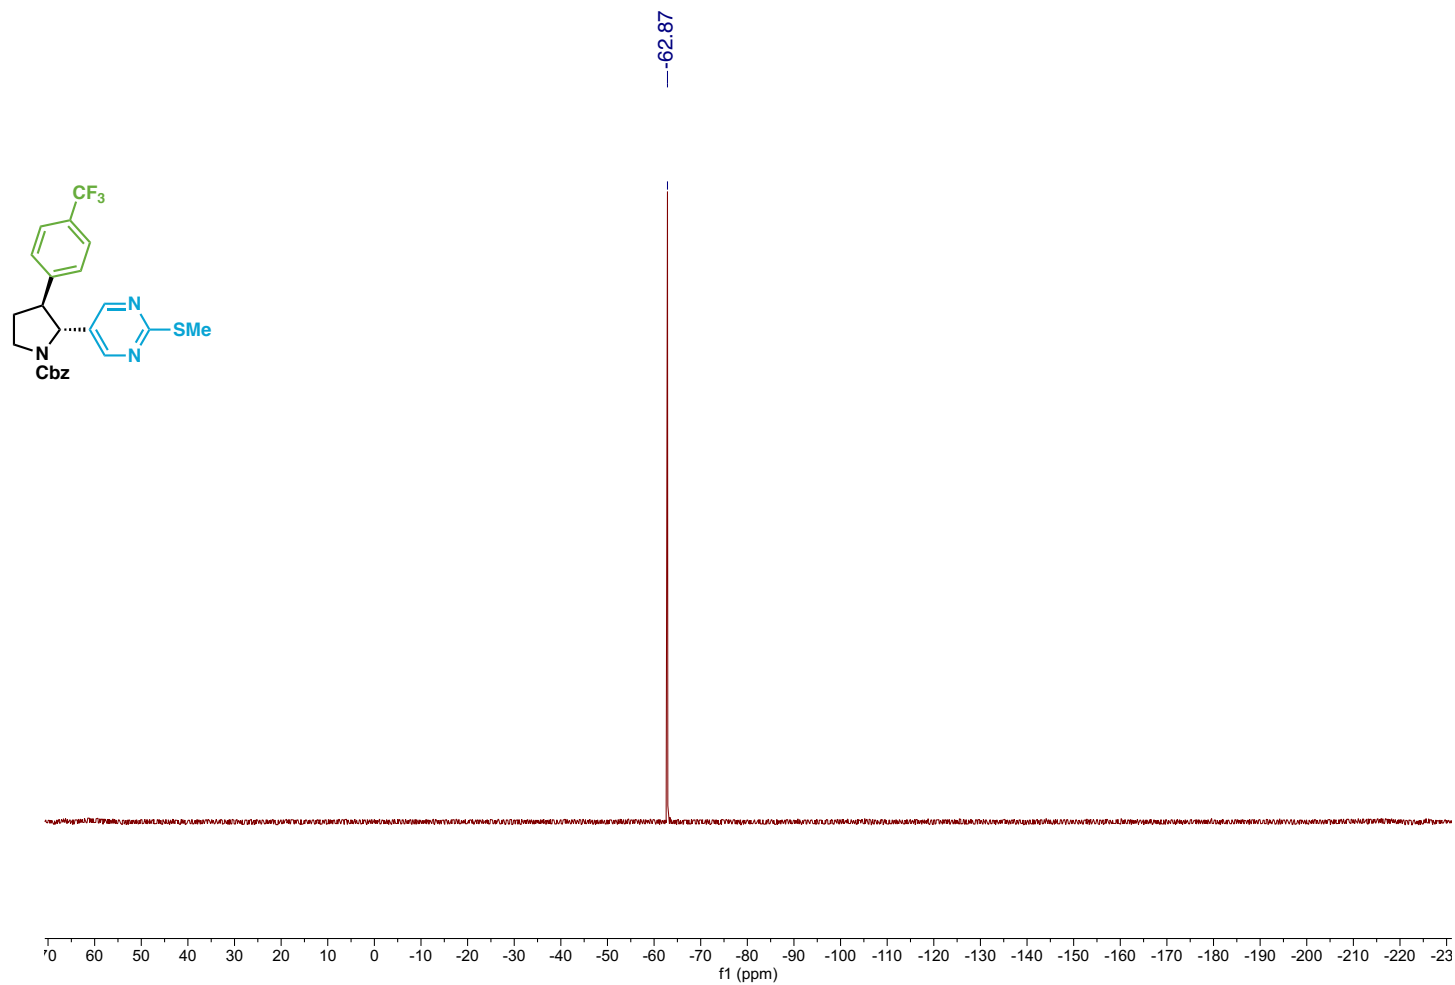

Compound 38 <sup>13</sup>C NMR

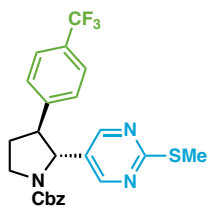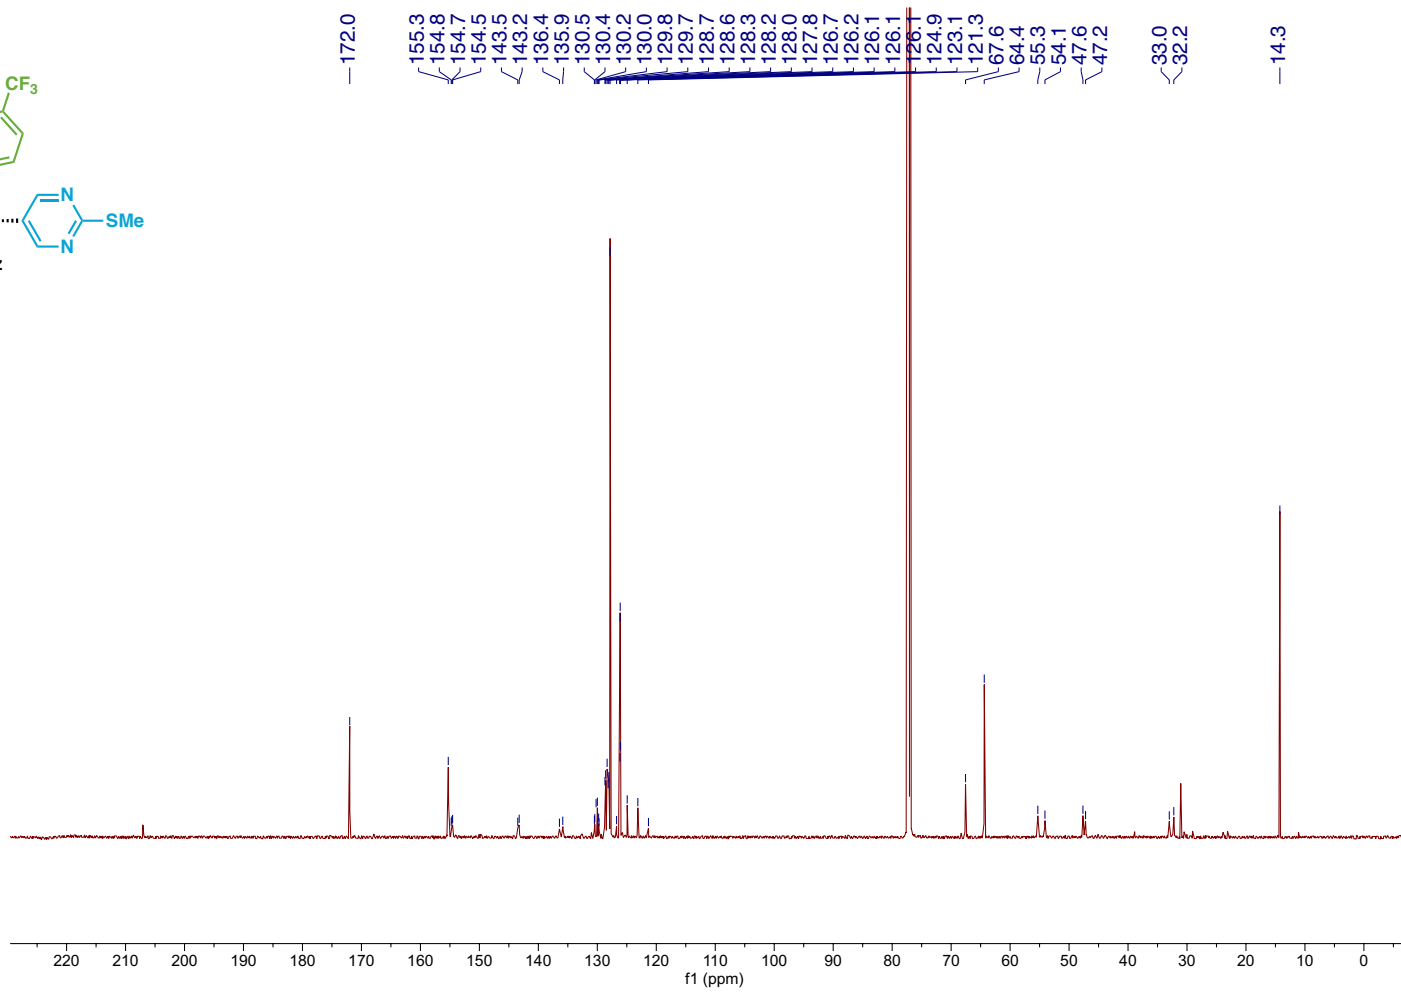

Compound 39 <sup>1</sup>H NMR

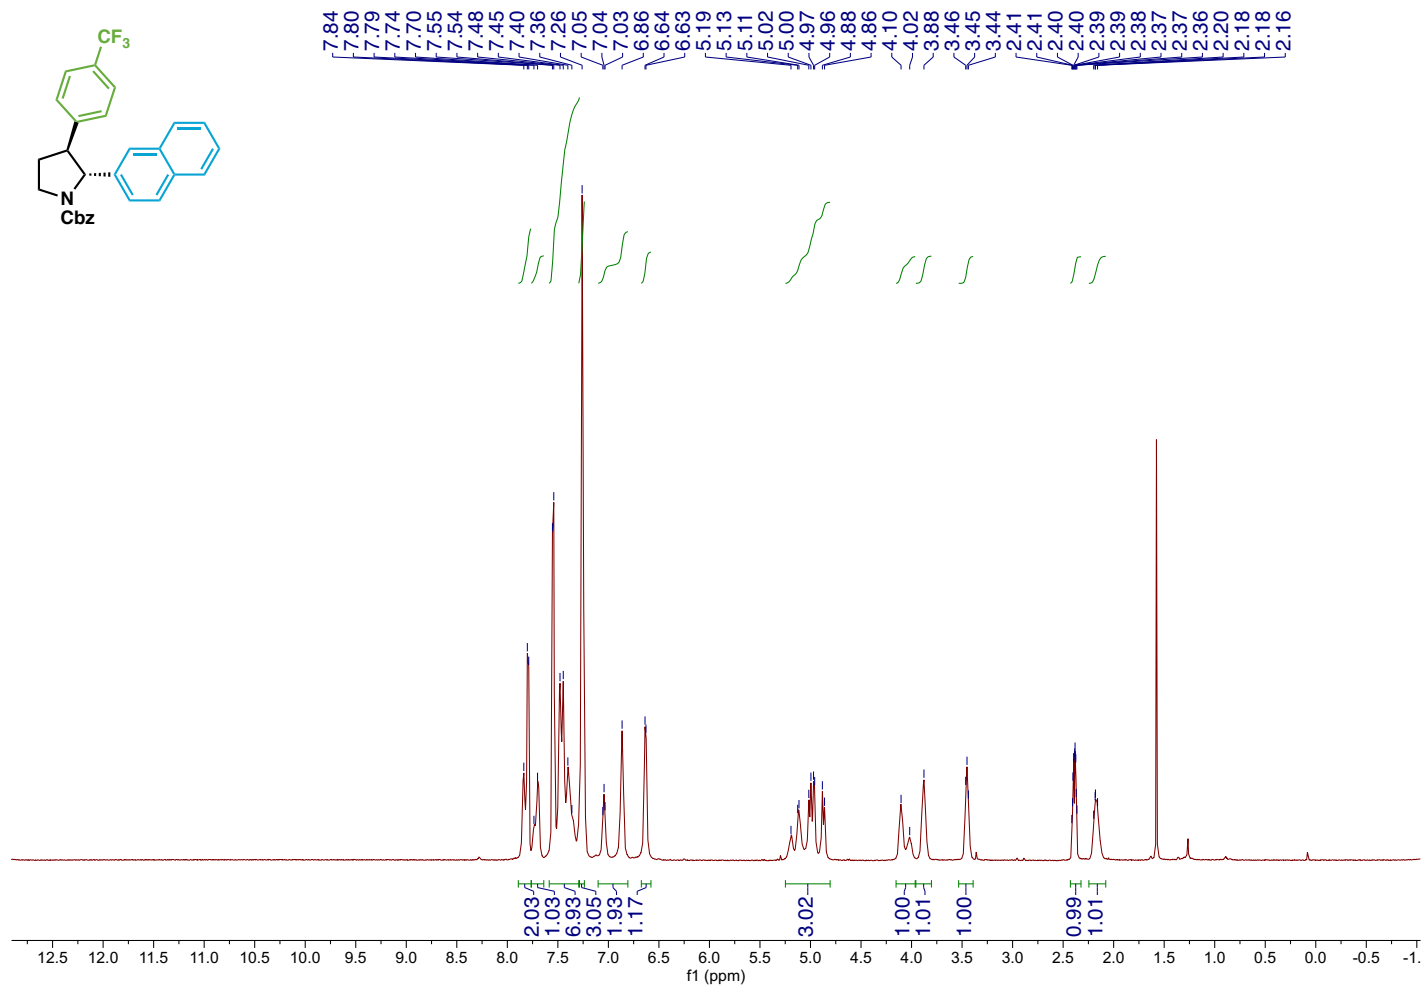

# Compound 39 <sup>19</sup>F NMR

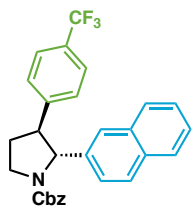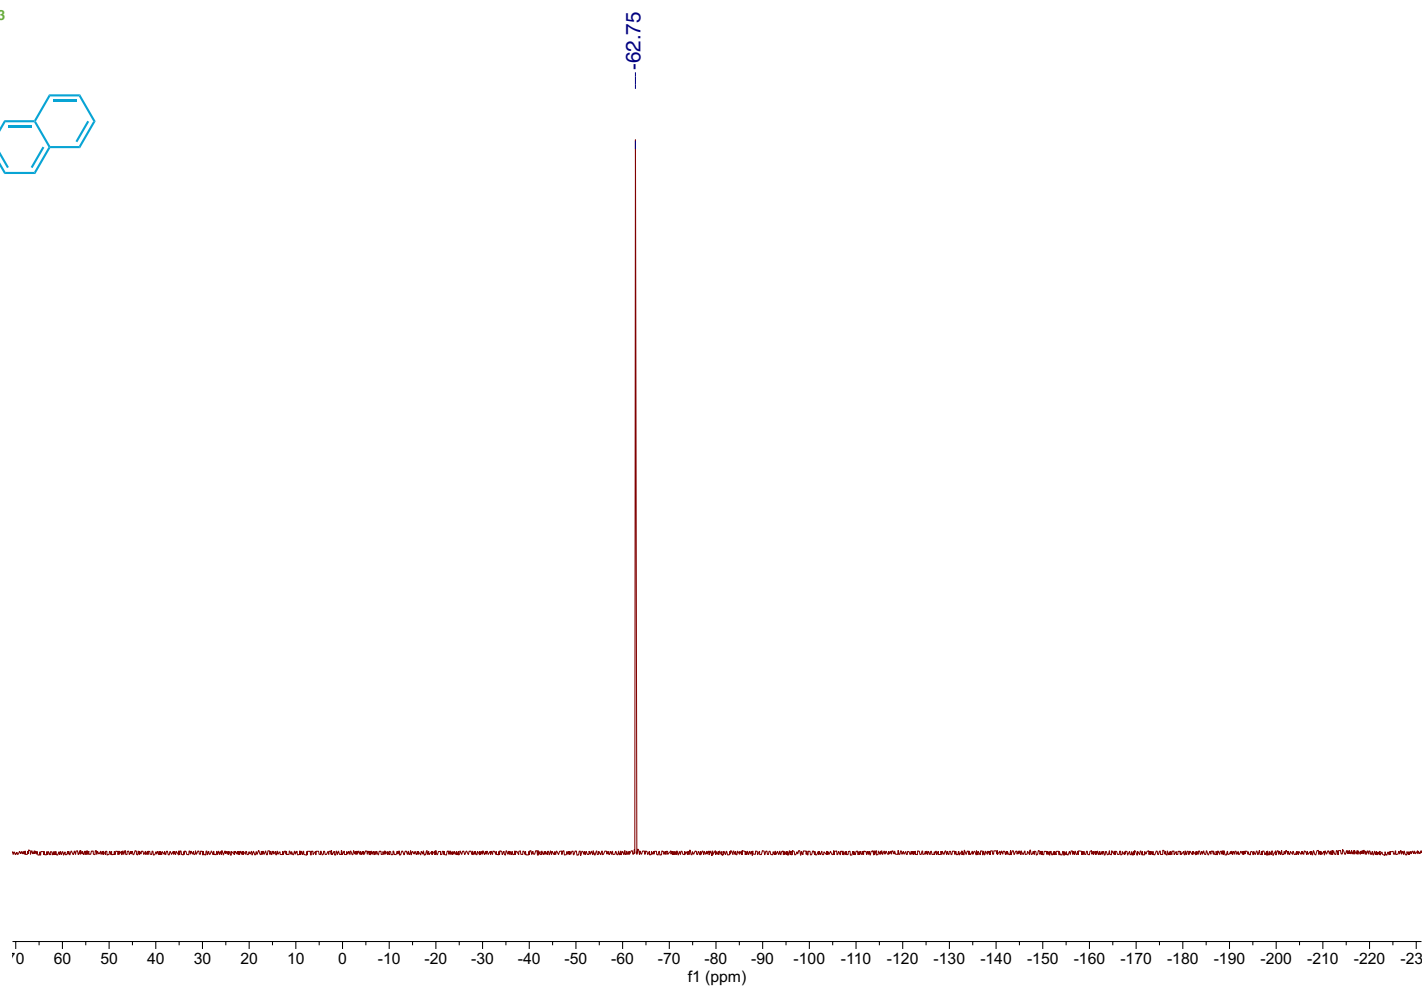



Compound 39 <sup>13</sup>C NMR

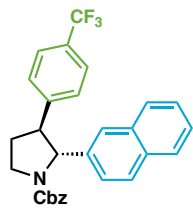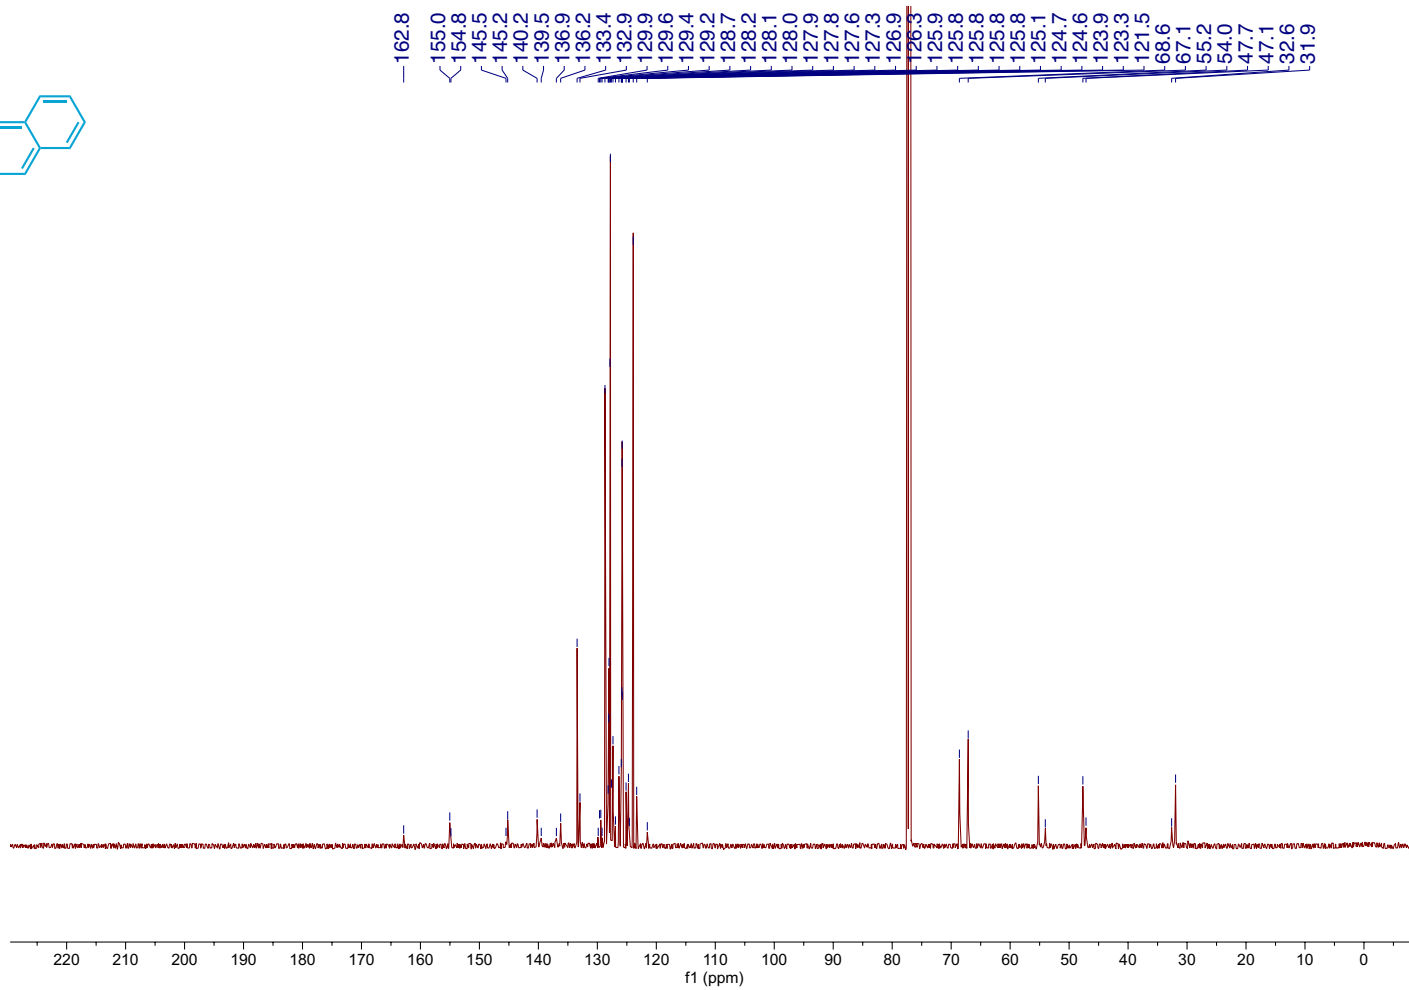

Compound 40 <sup>1</sup>H NMR

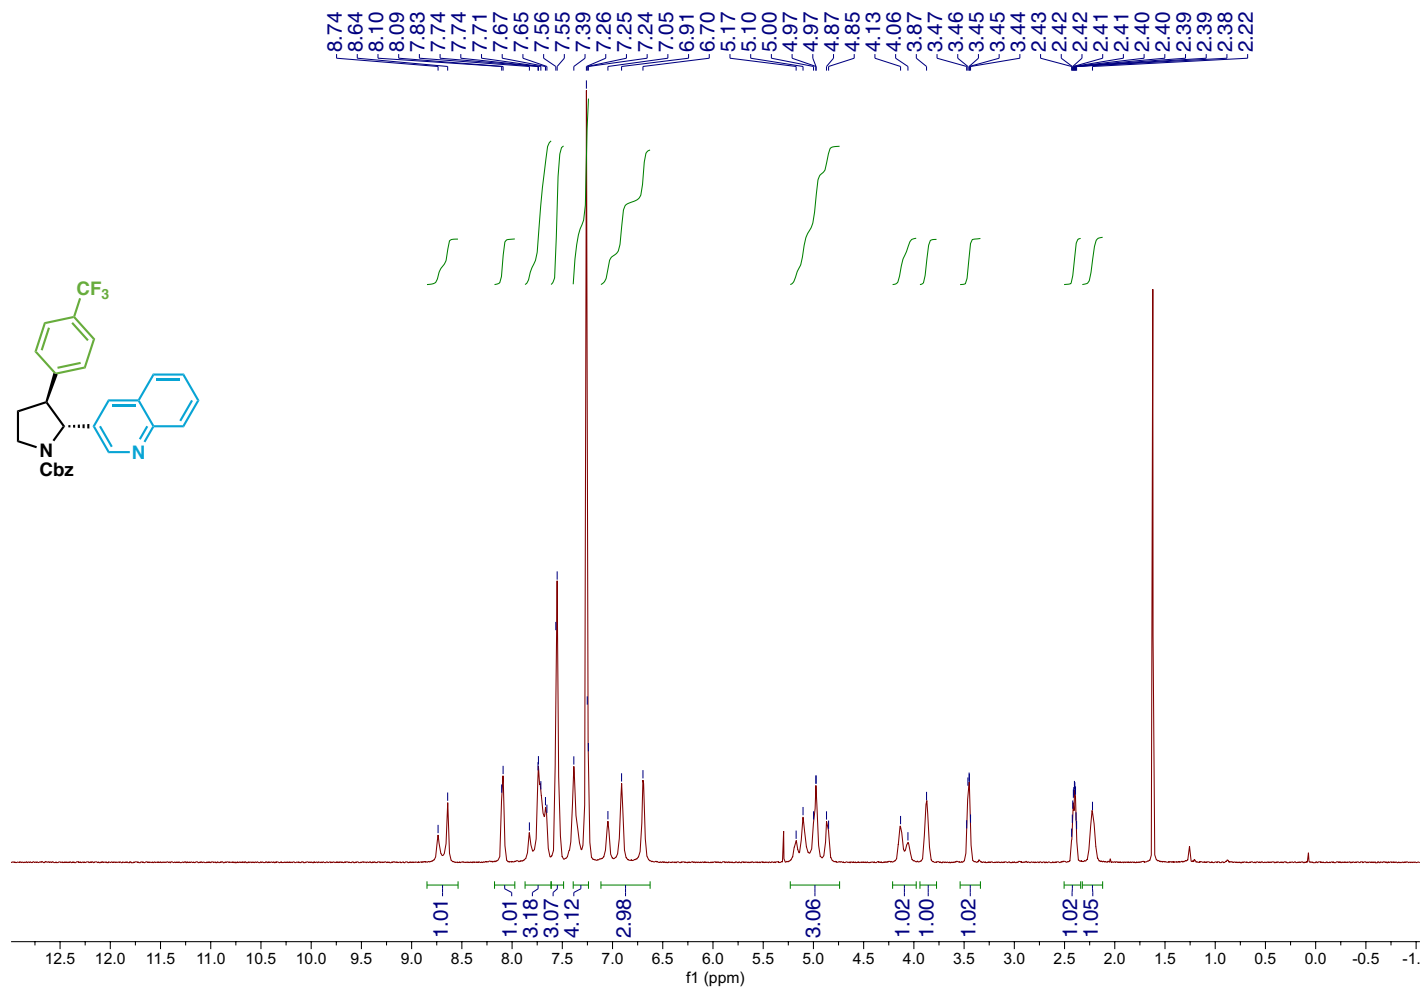

Compound 40 <sup>19</sup>F NMR

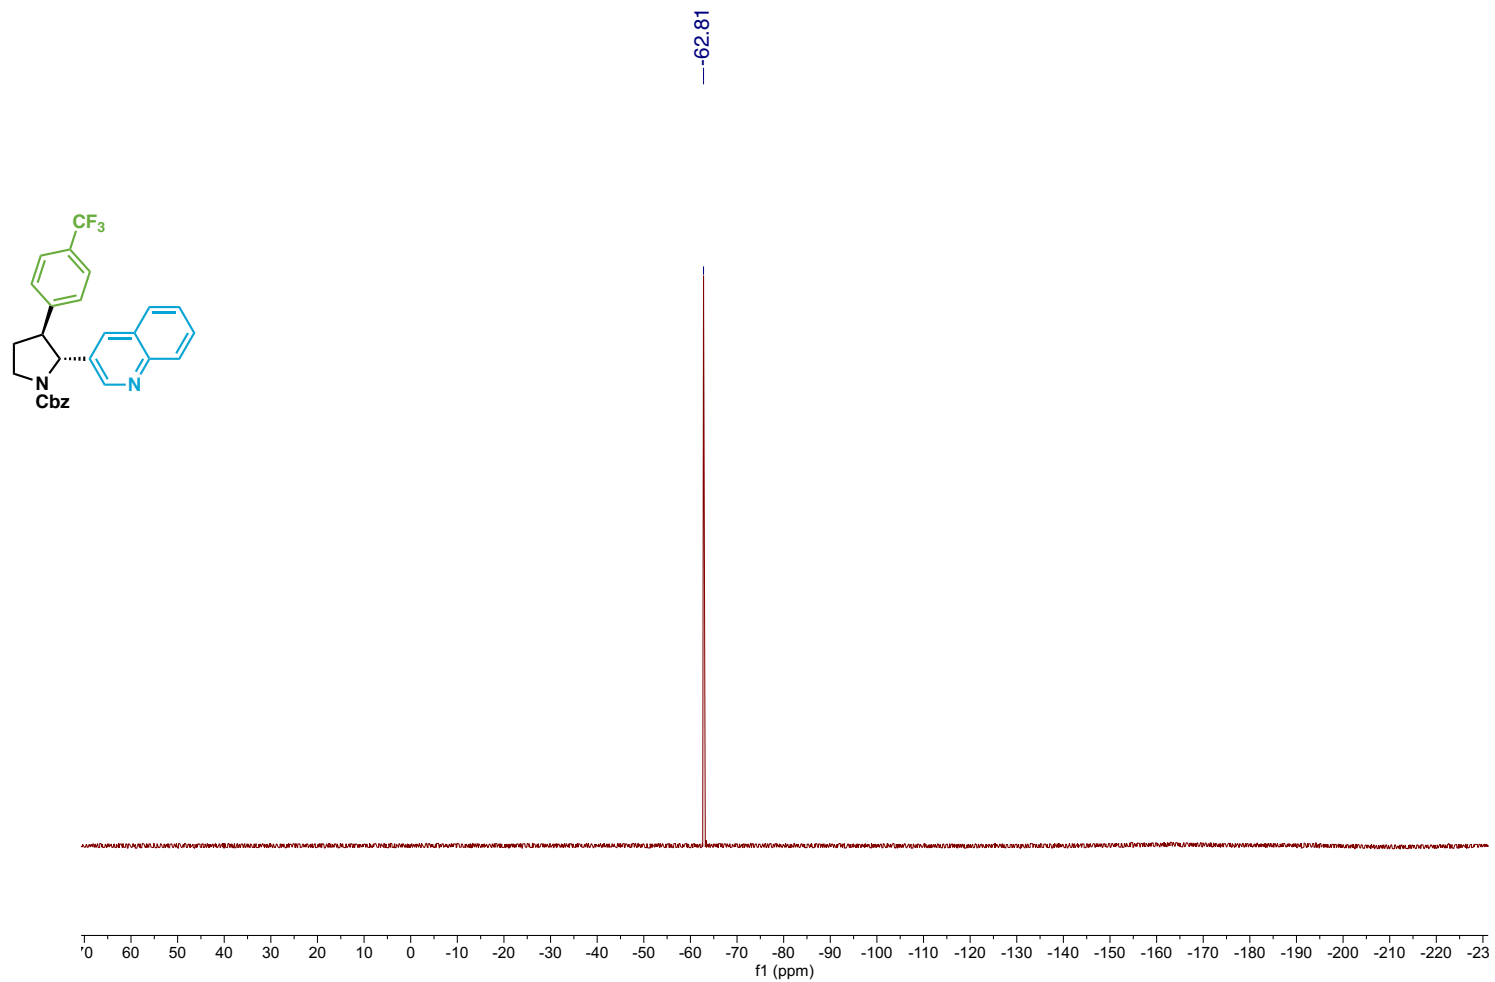

Compound 40 <sup>13</sup>C NMR

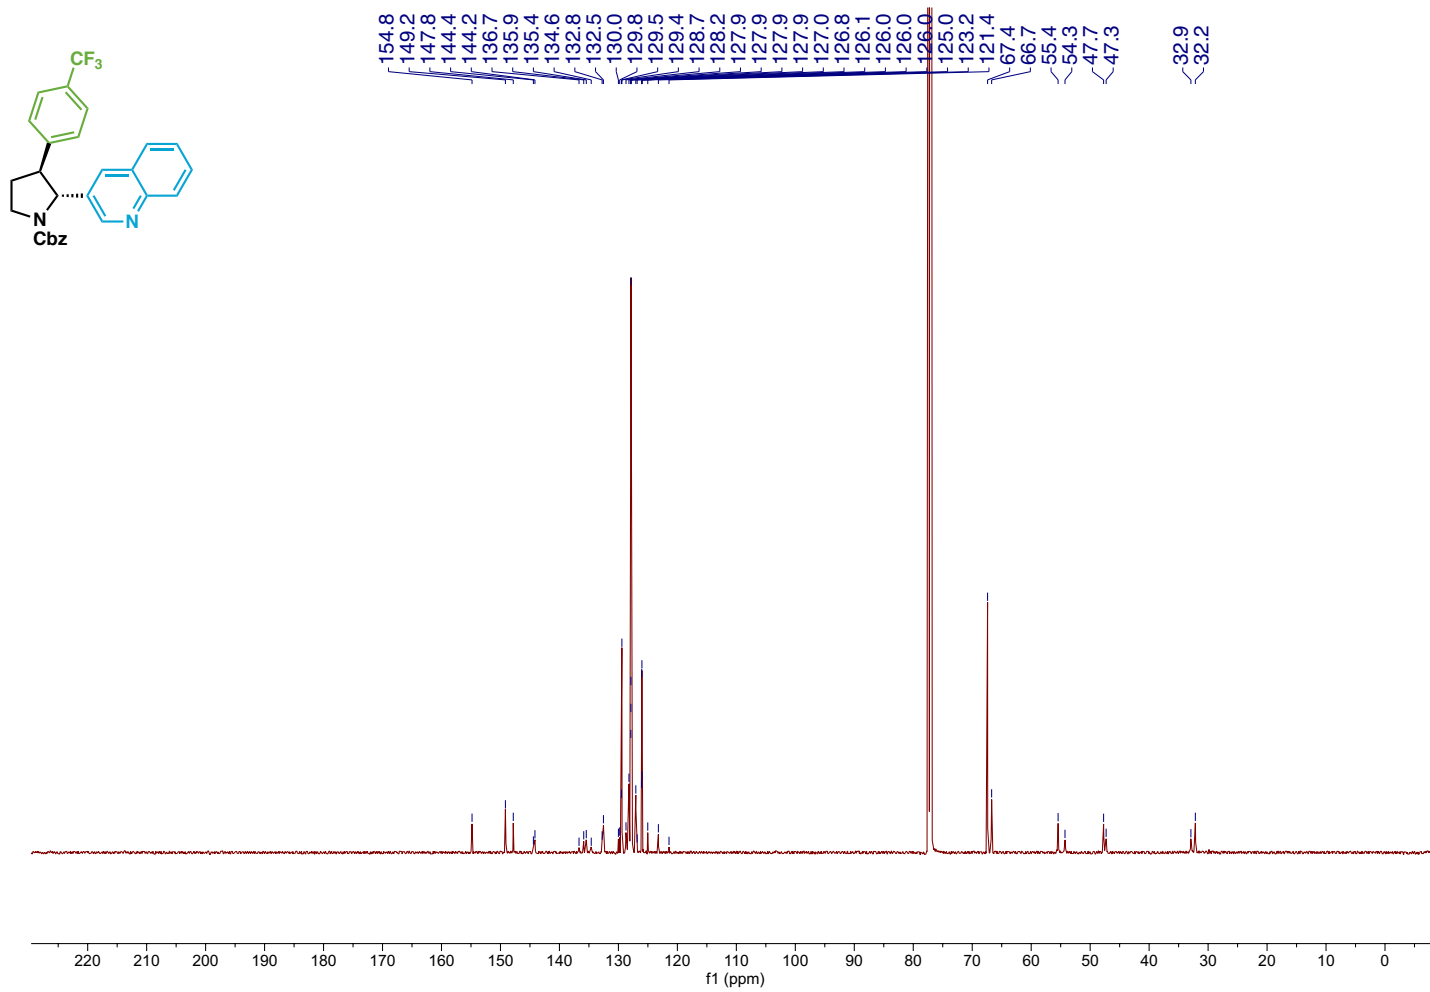

# Compound B11 <sup>1</sup>H NMR

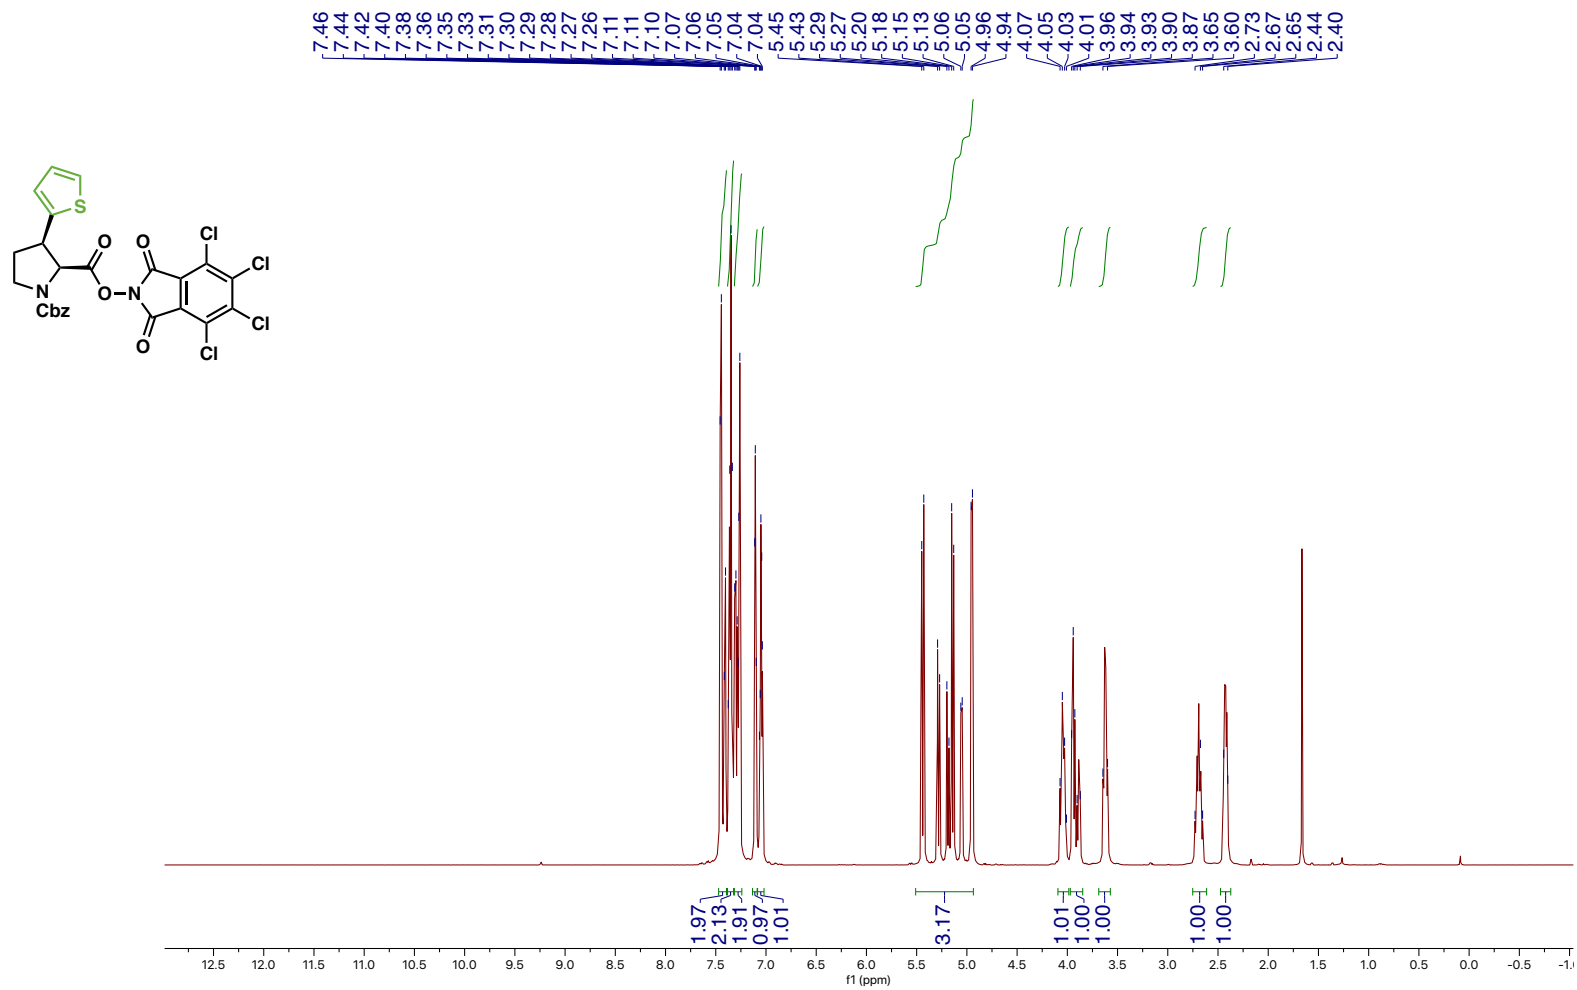

# Compound B11 <sup>13</sup>C NMR

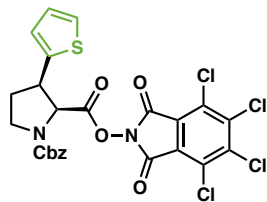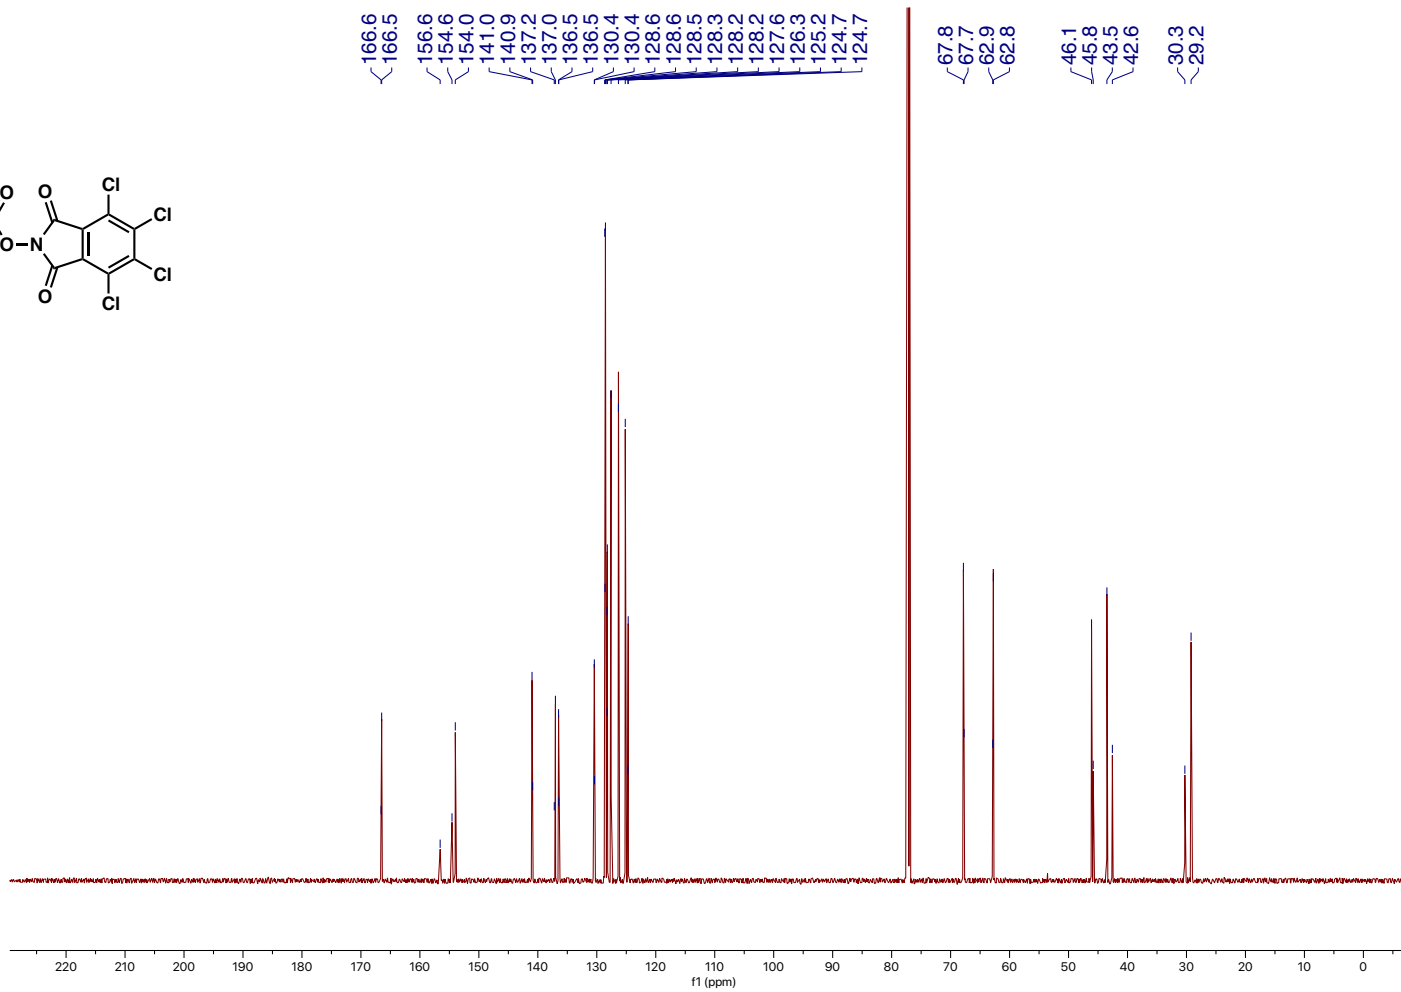

Compound 41 <sup>1</sup>H NMR

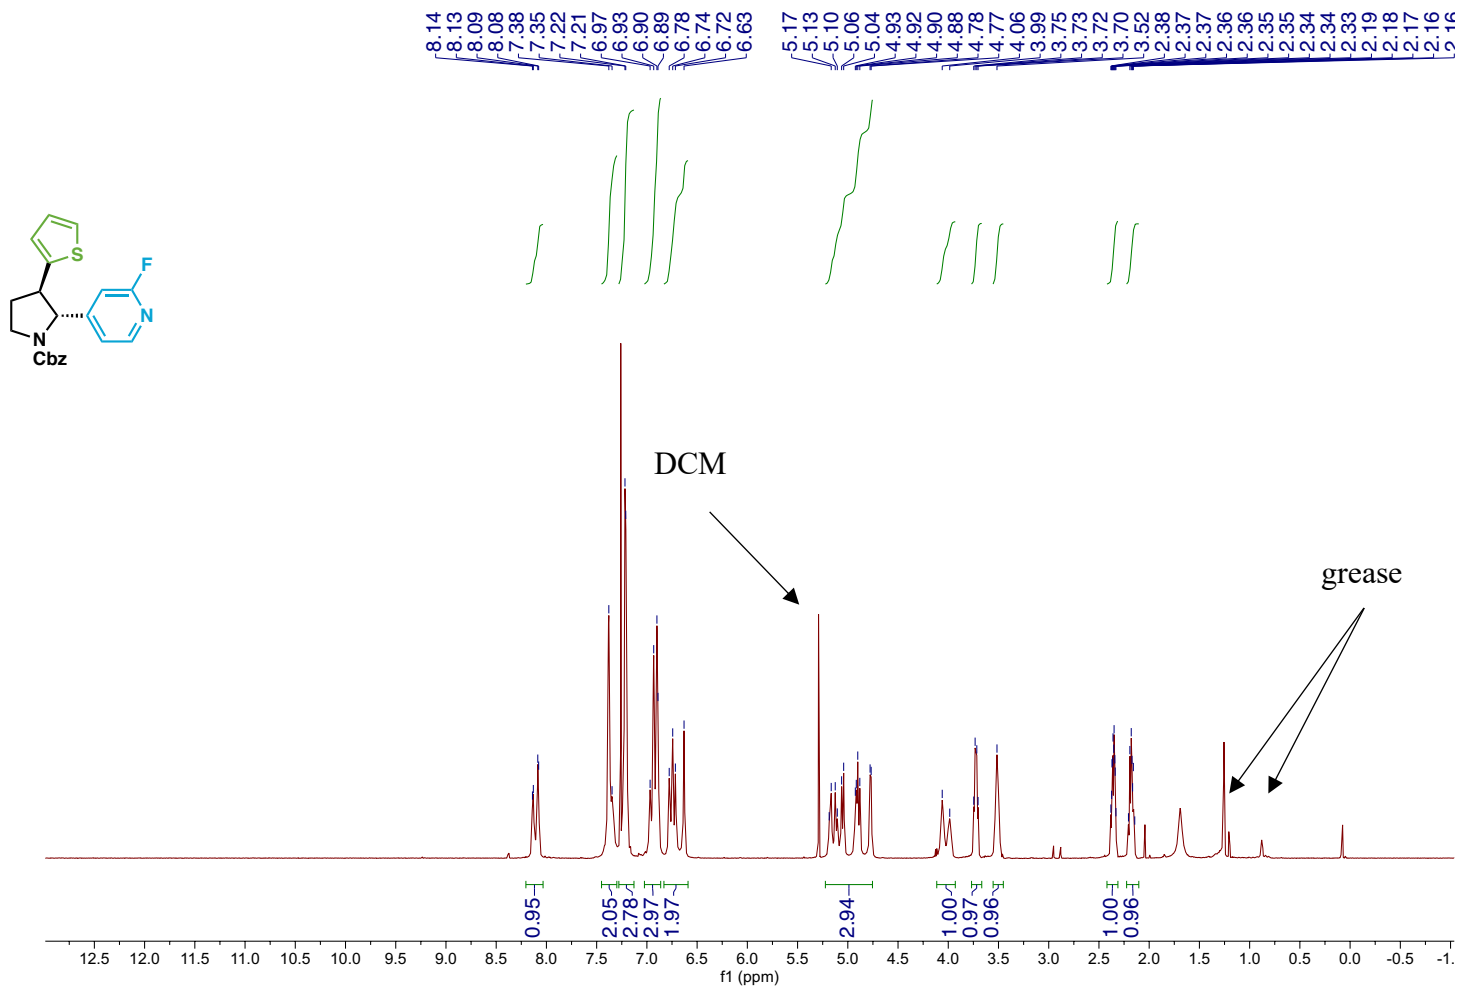

Compound 41 <sup>19</sup>F NMR

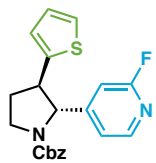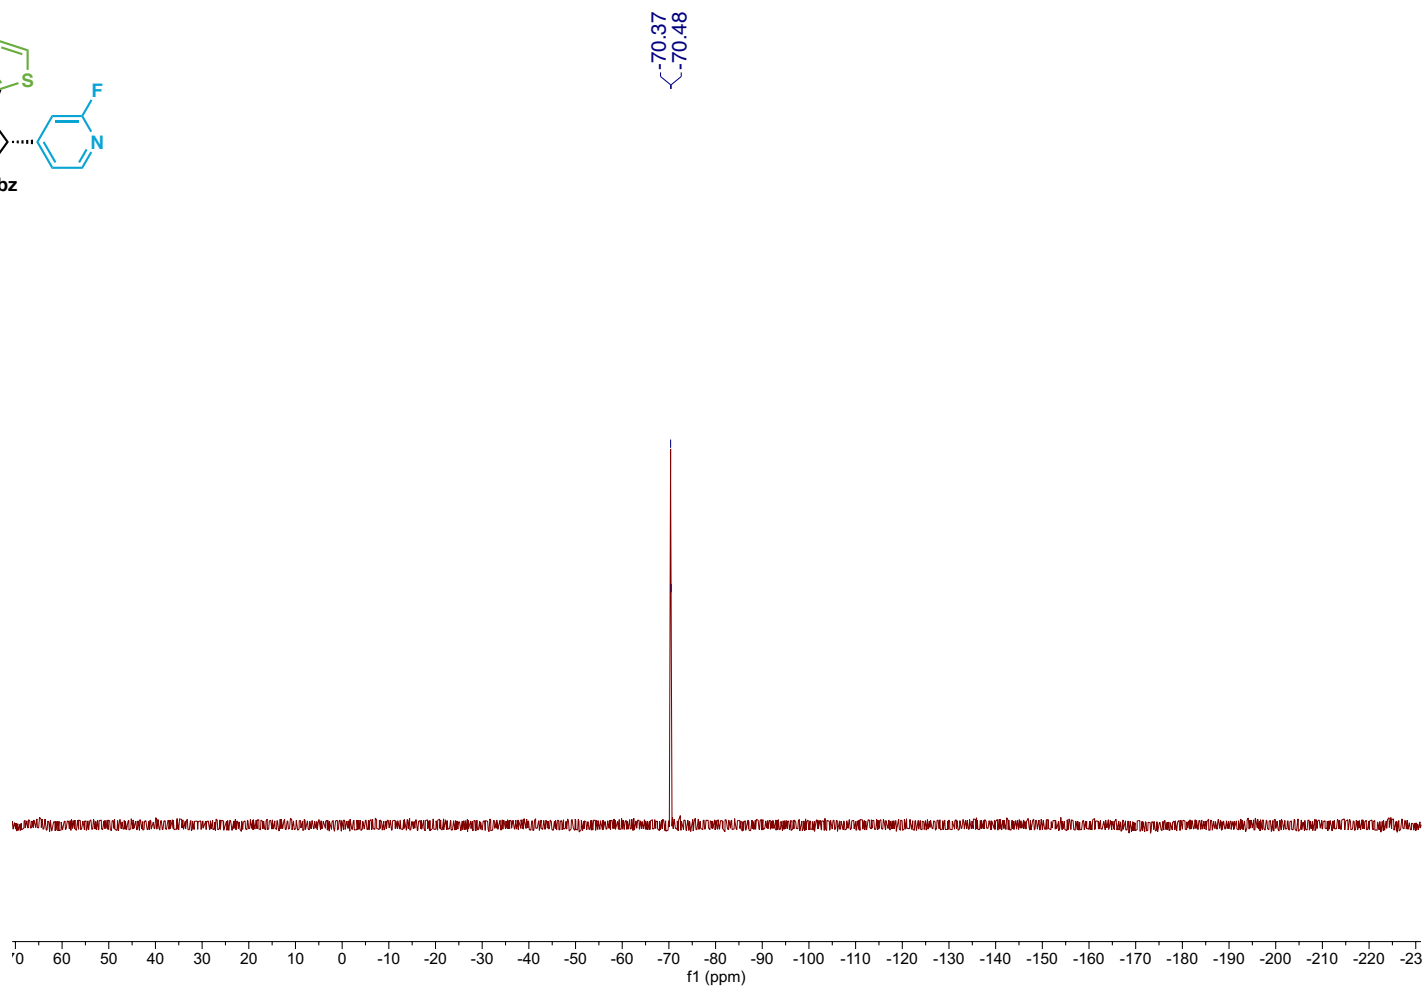



Compound 41 <sup>13</sup>C NMR

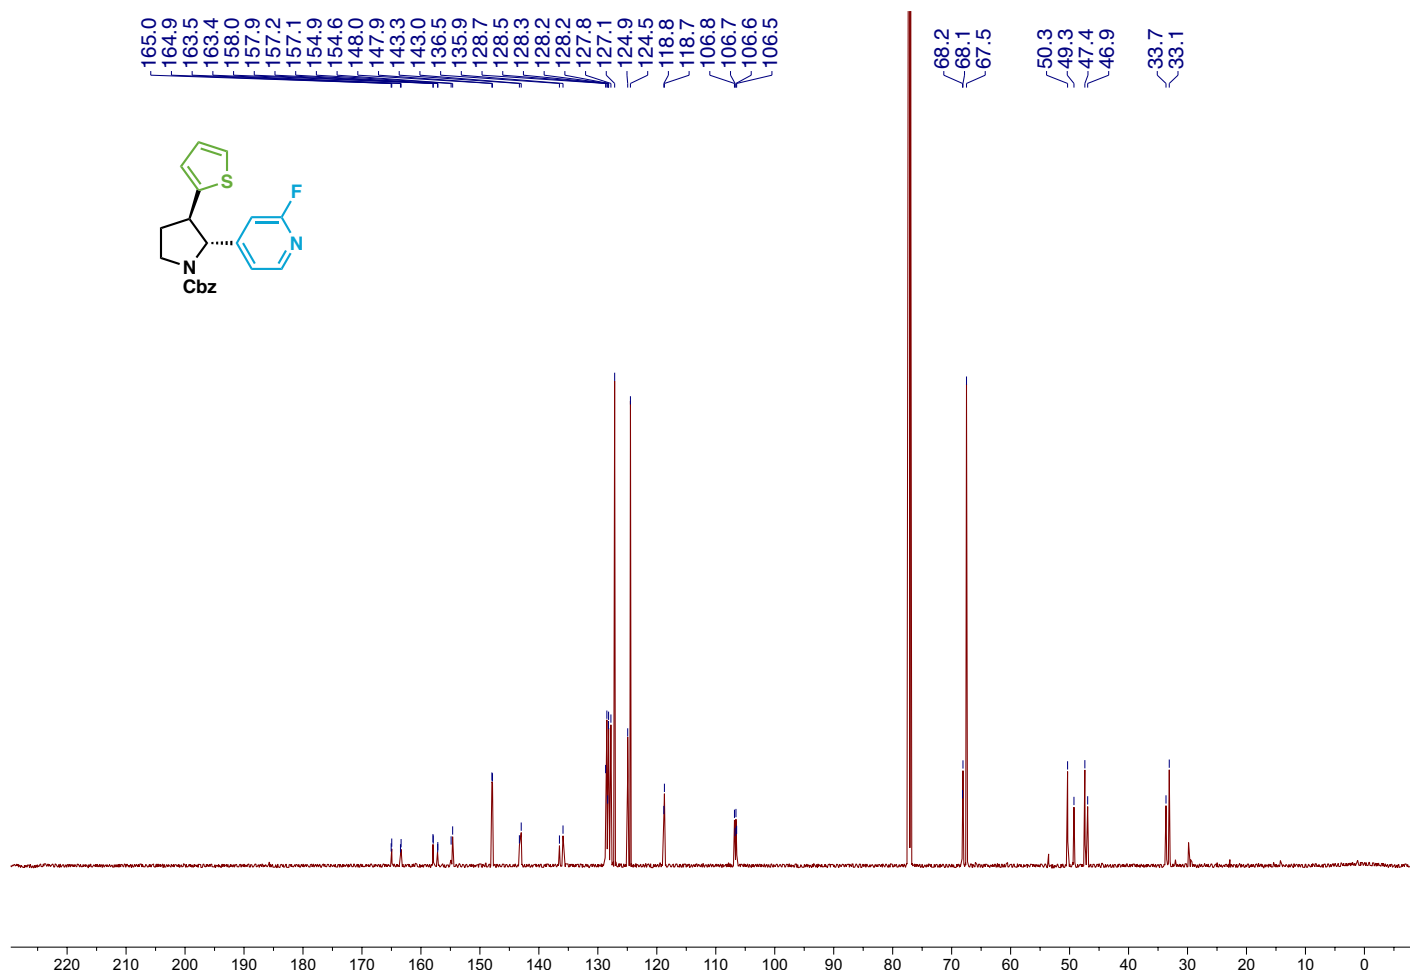

Compound 42 <sup>1</sup>H NMR

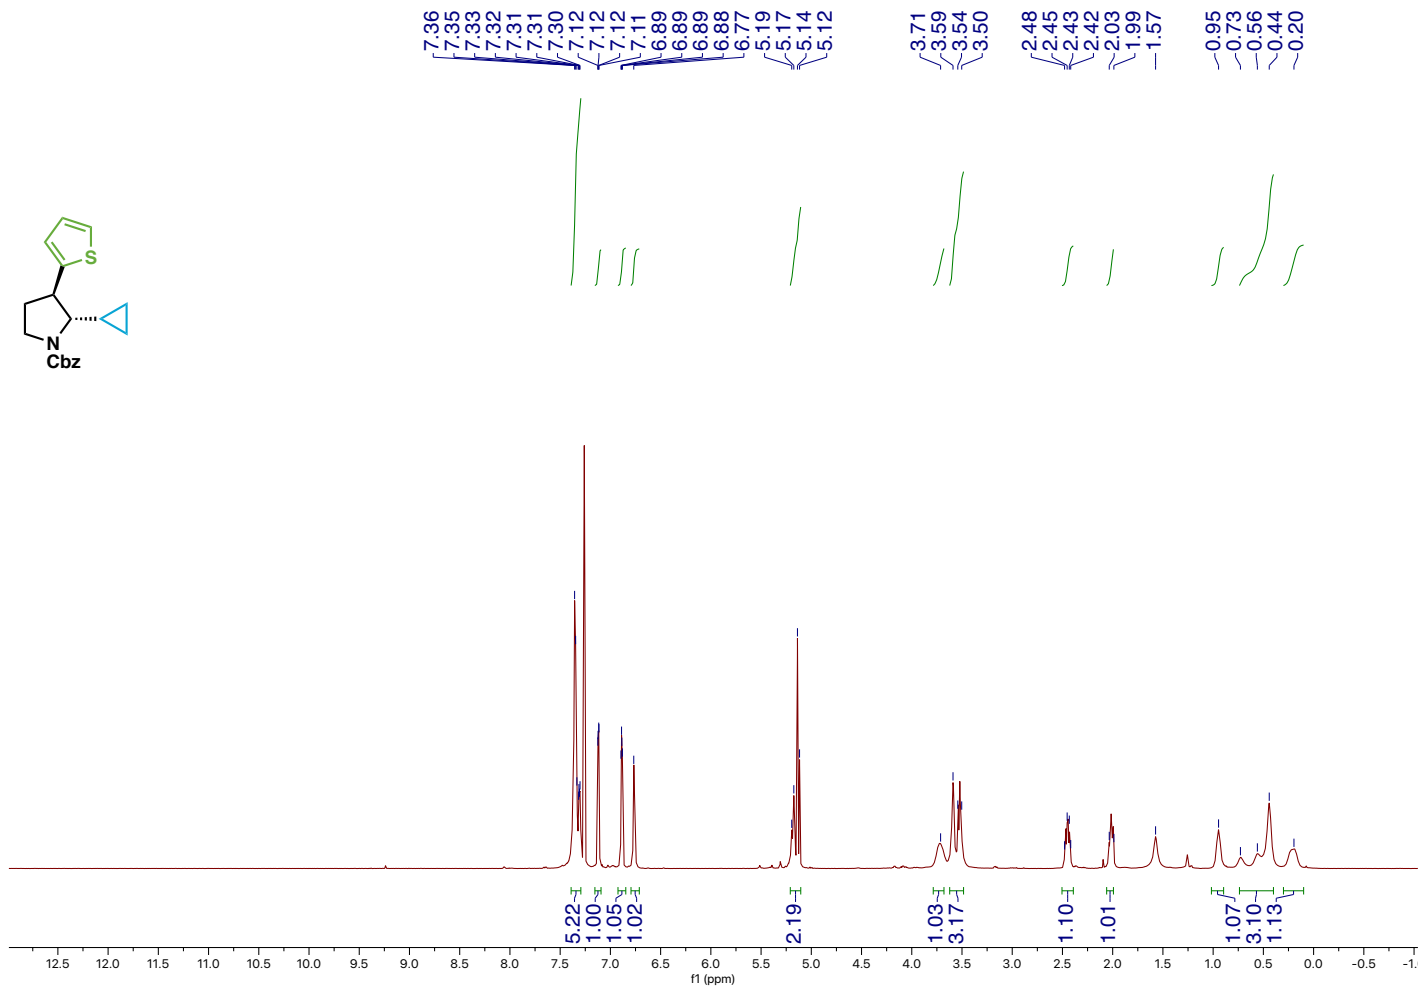

# Compound 42 <sup>13</sup>C NMR

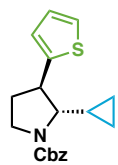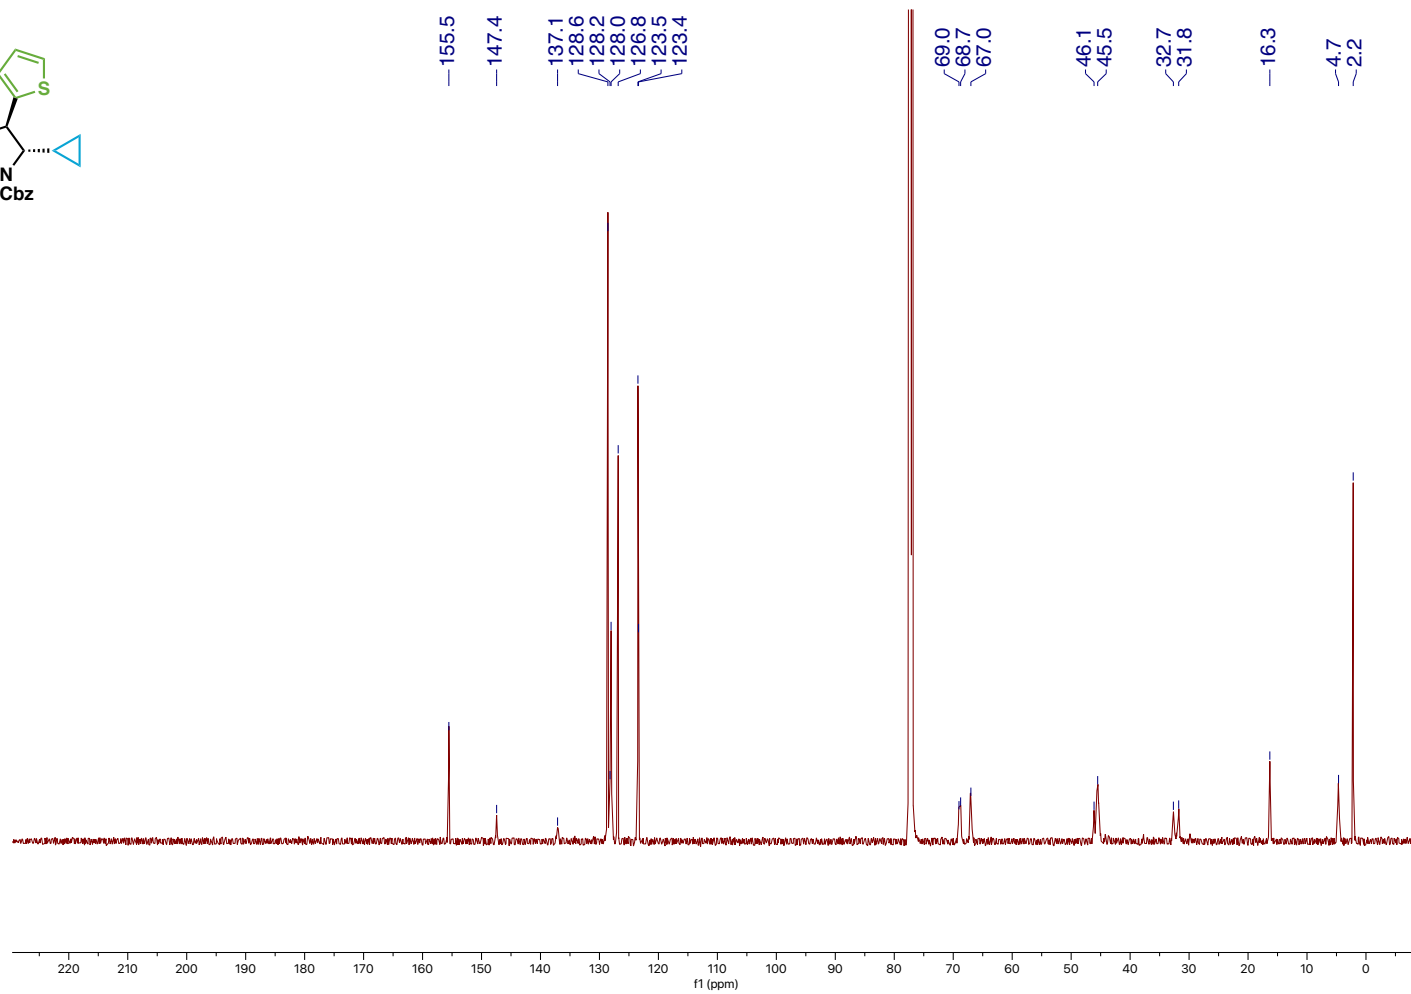

Compound 43 <sup>1</sup>H NMR

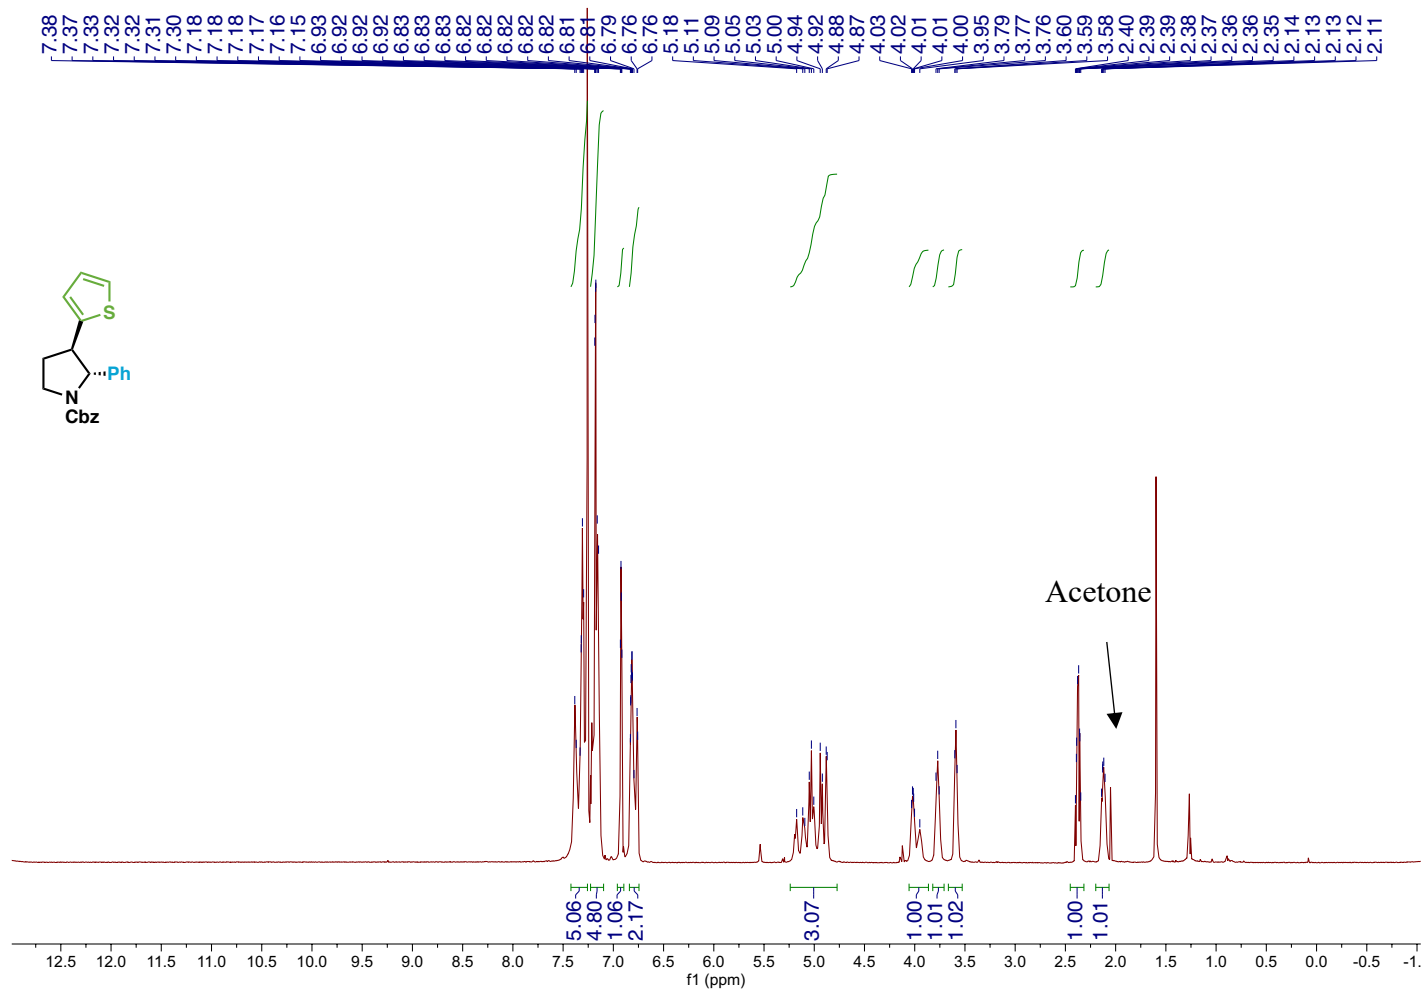

Compound 43 <sup>13</sup>C NMR

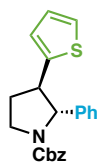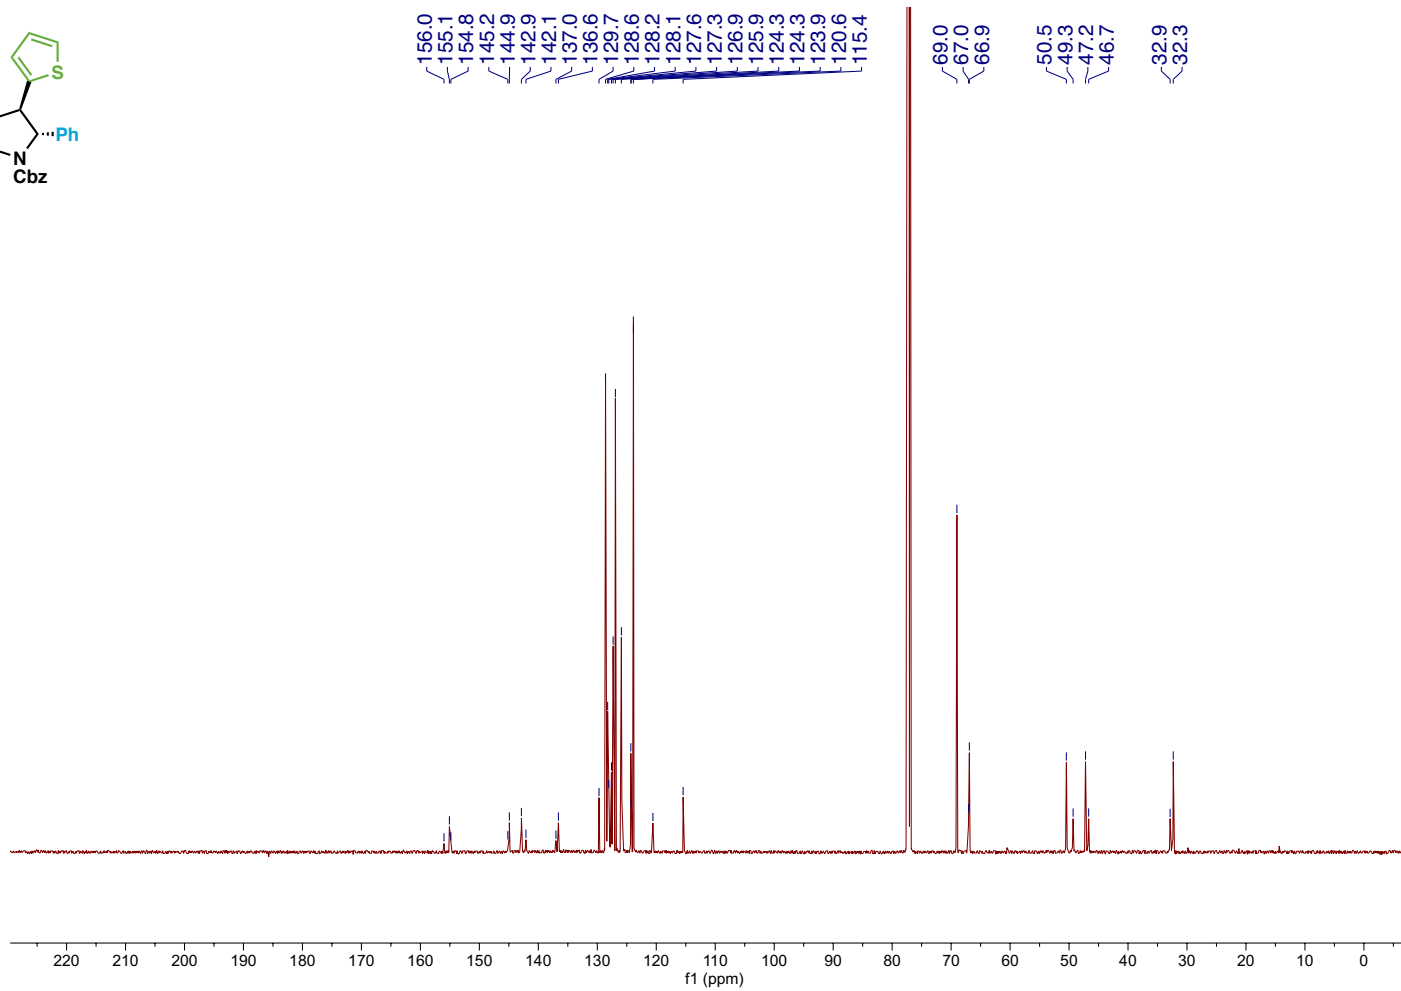

Compound 44 <sup>1</sup>H NMR

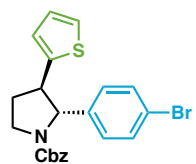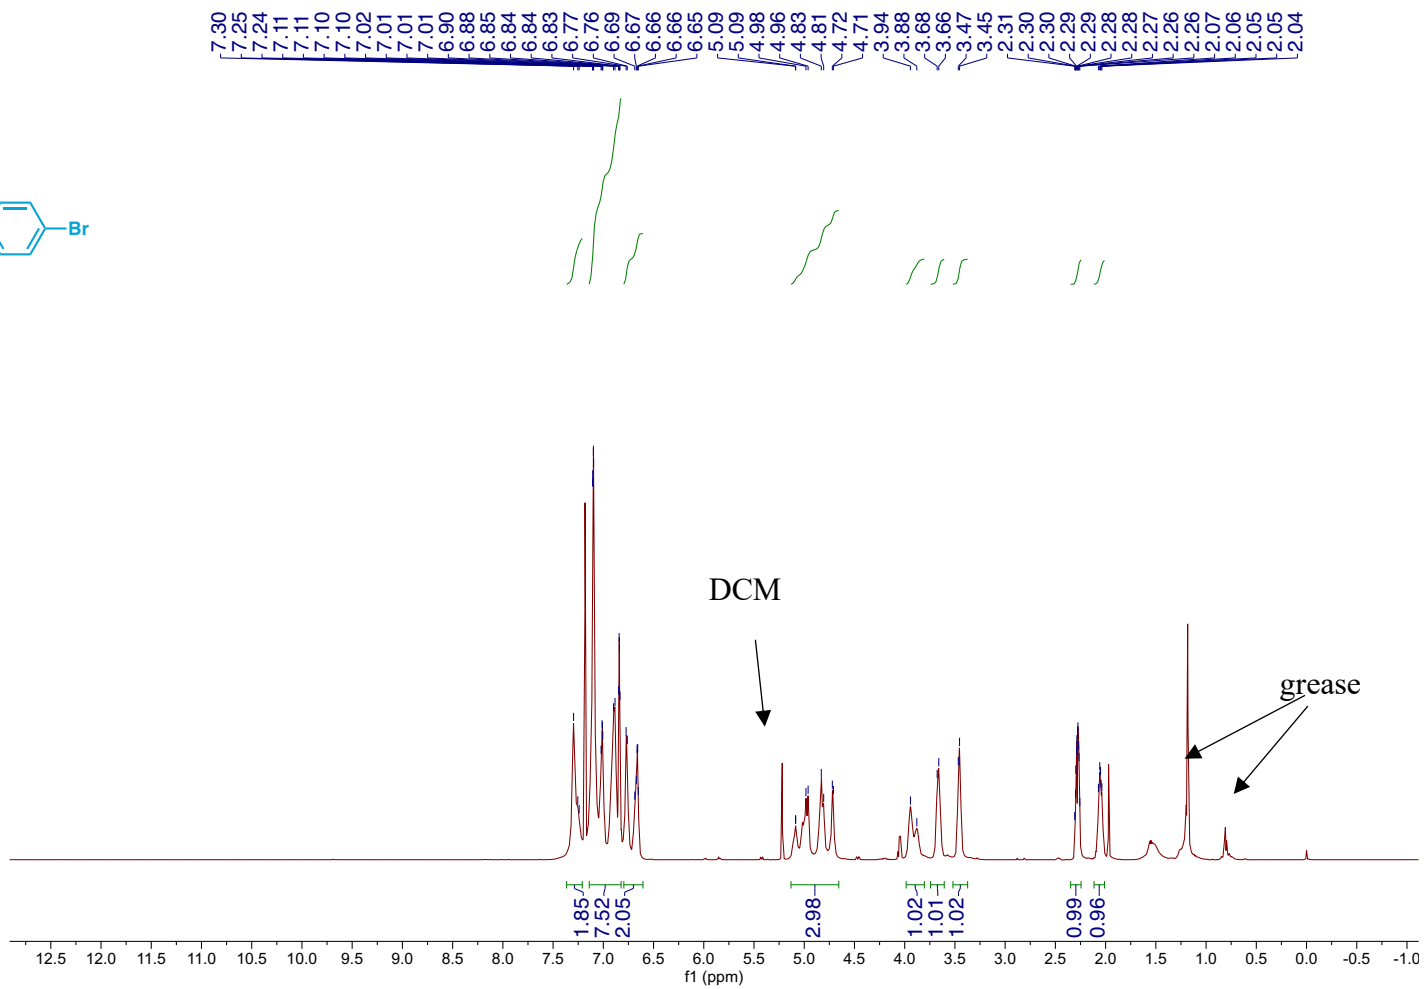

Compound 44 <sup>13</sup>C NMR

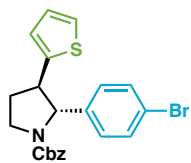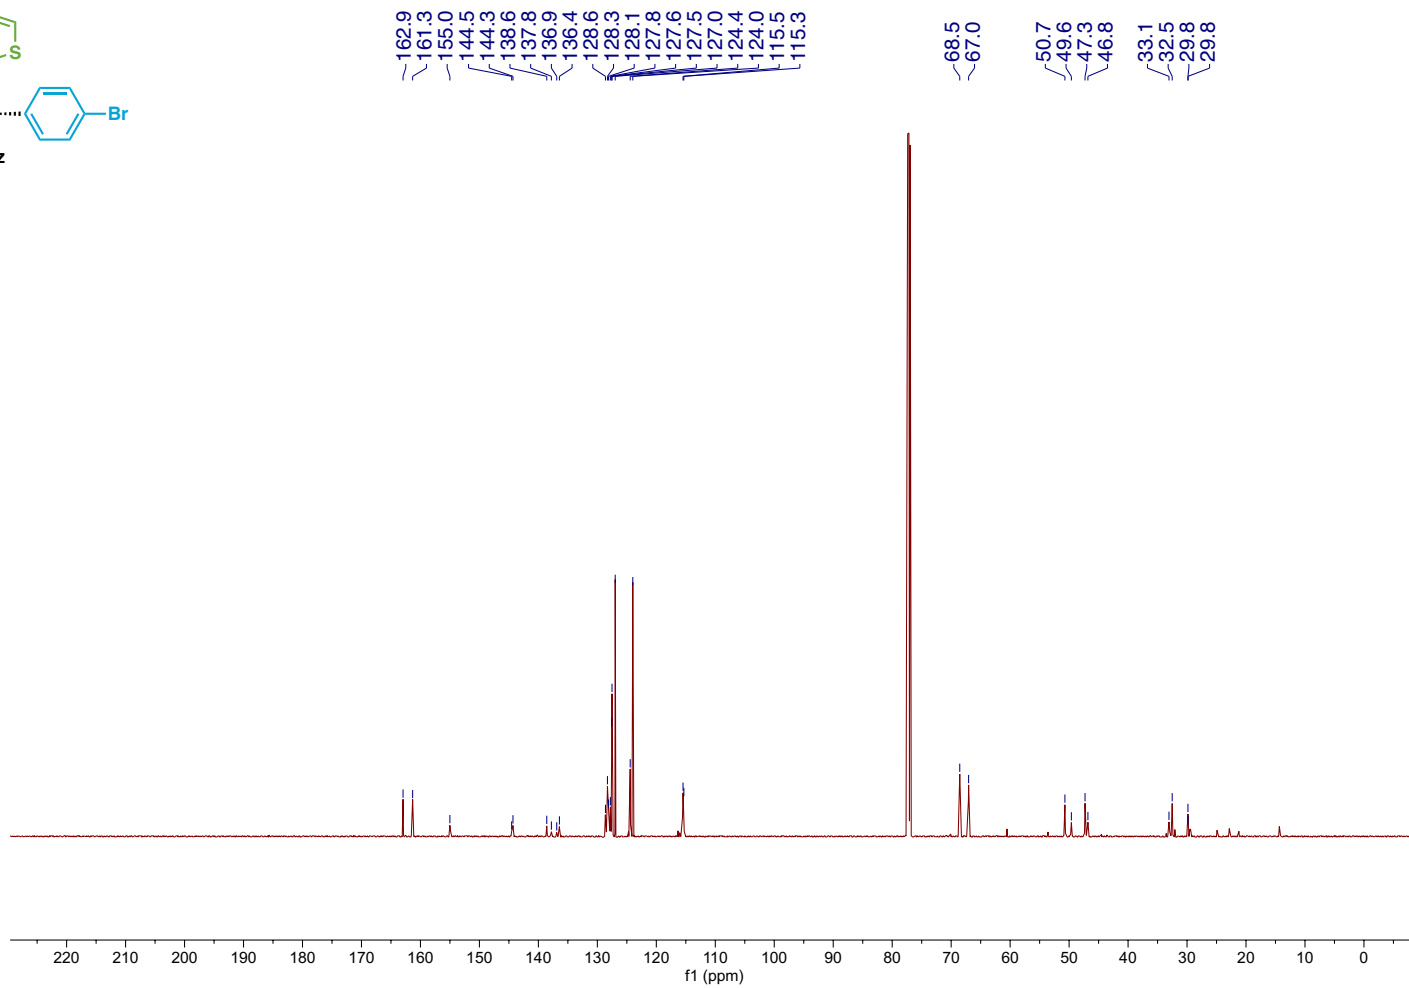

Compound B15 <sup>1</sup>H NMR

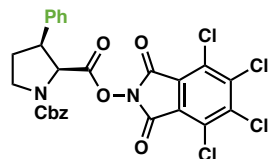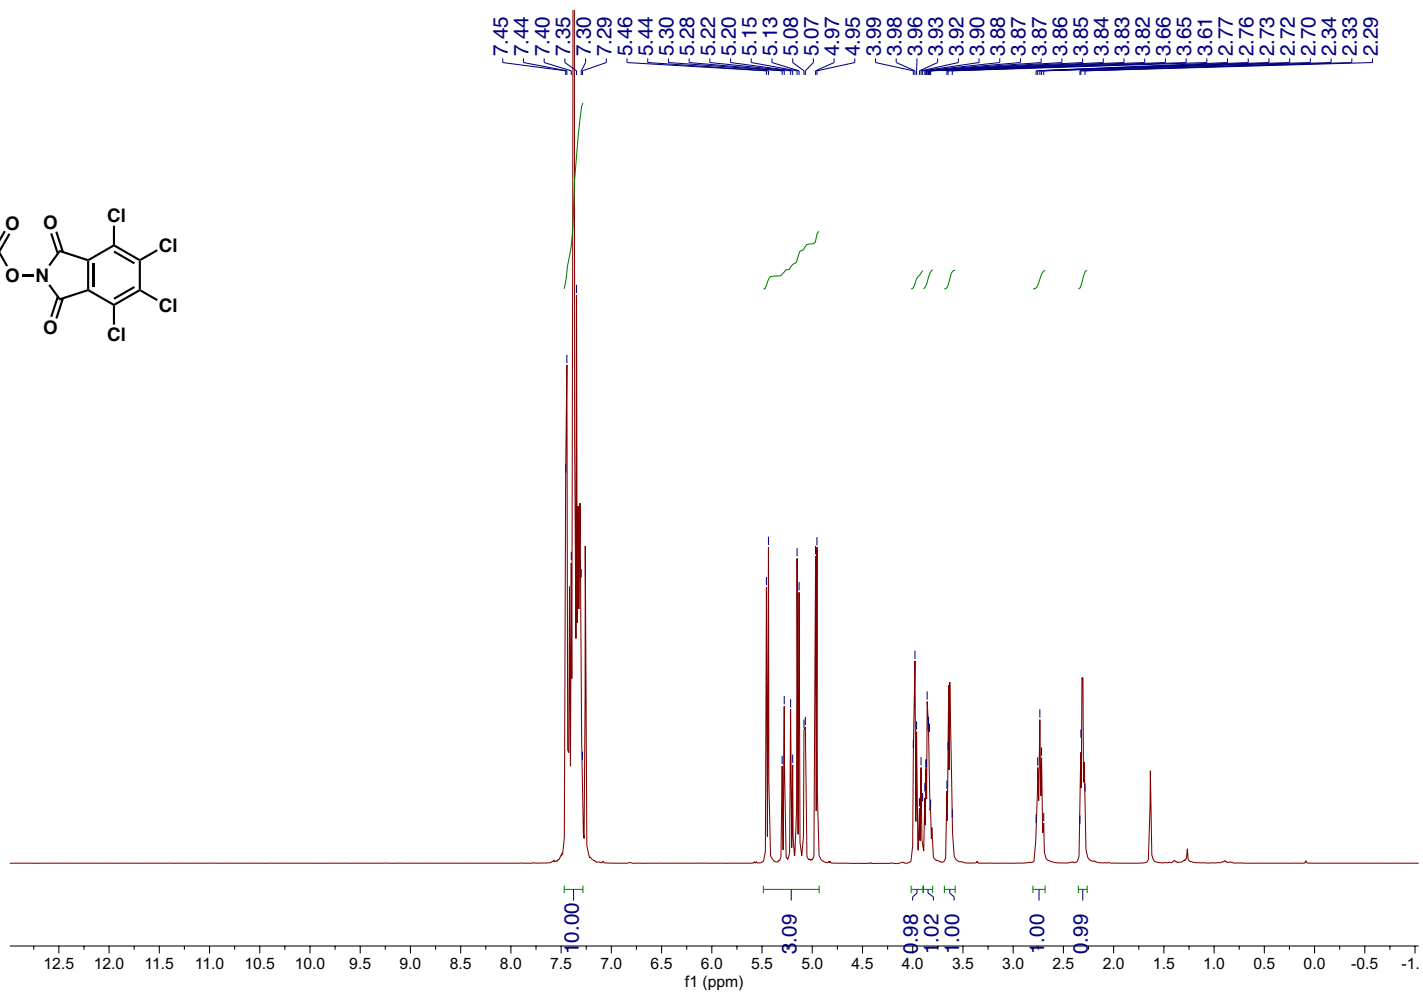



# Compound B15 <sup>13</sup>C NMR

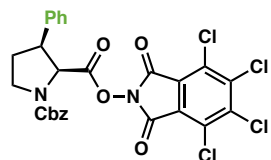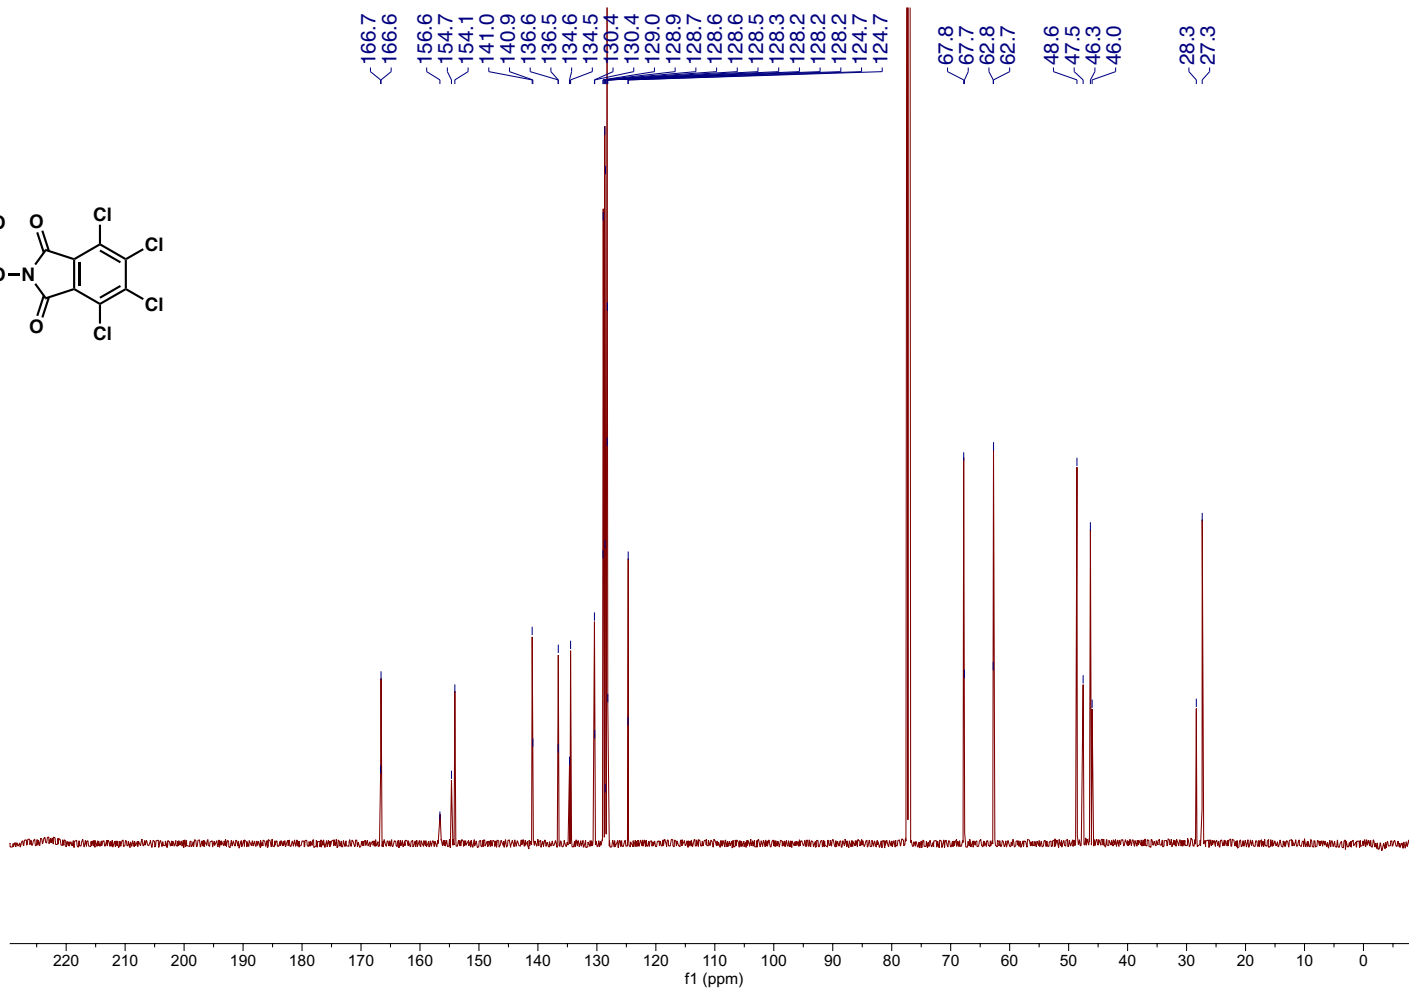

Compound 45 <sup>1</sup>H NMR

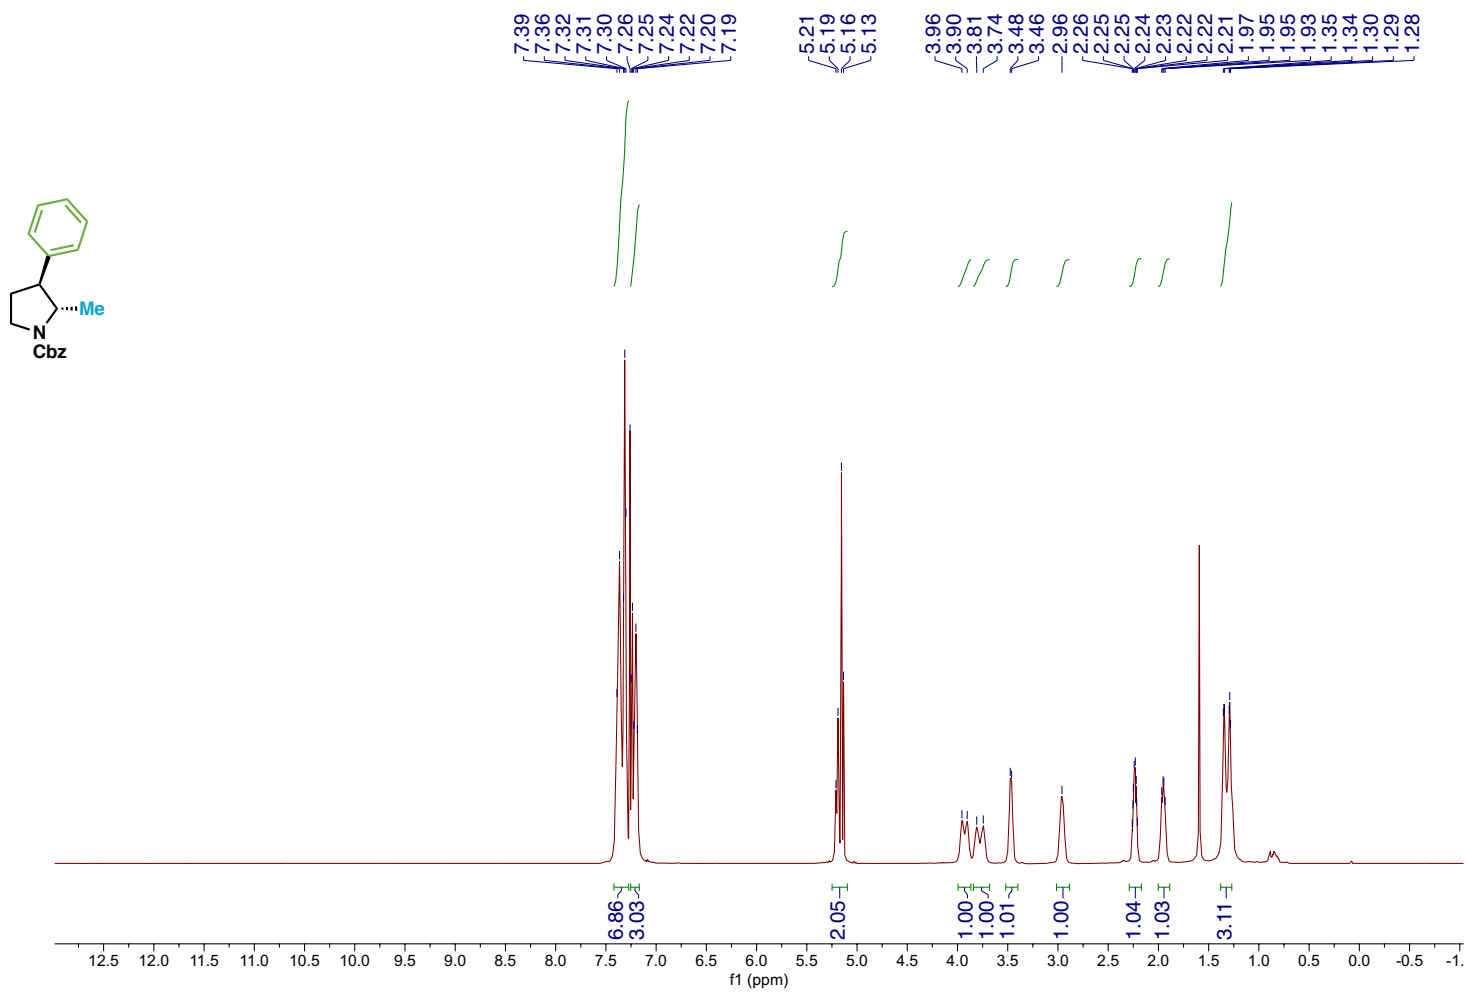

Compound 45 <sup>13</sup>C NMR

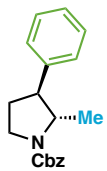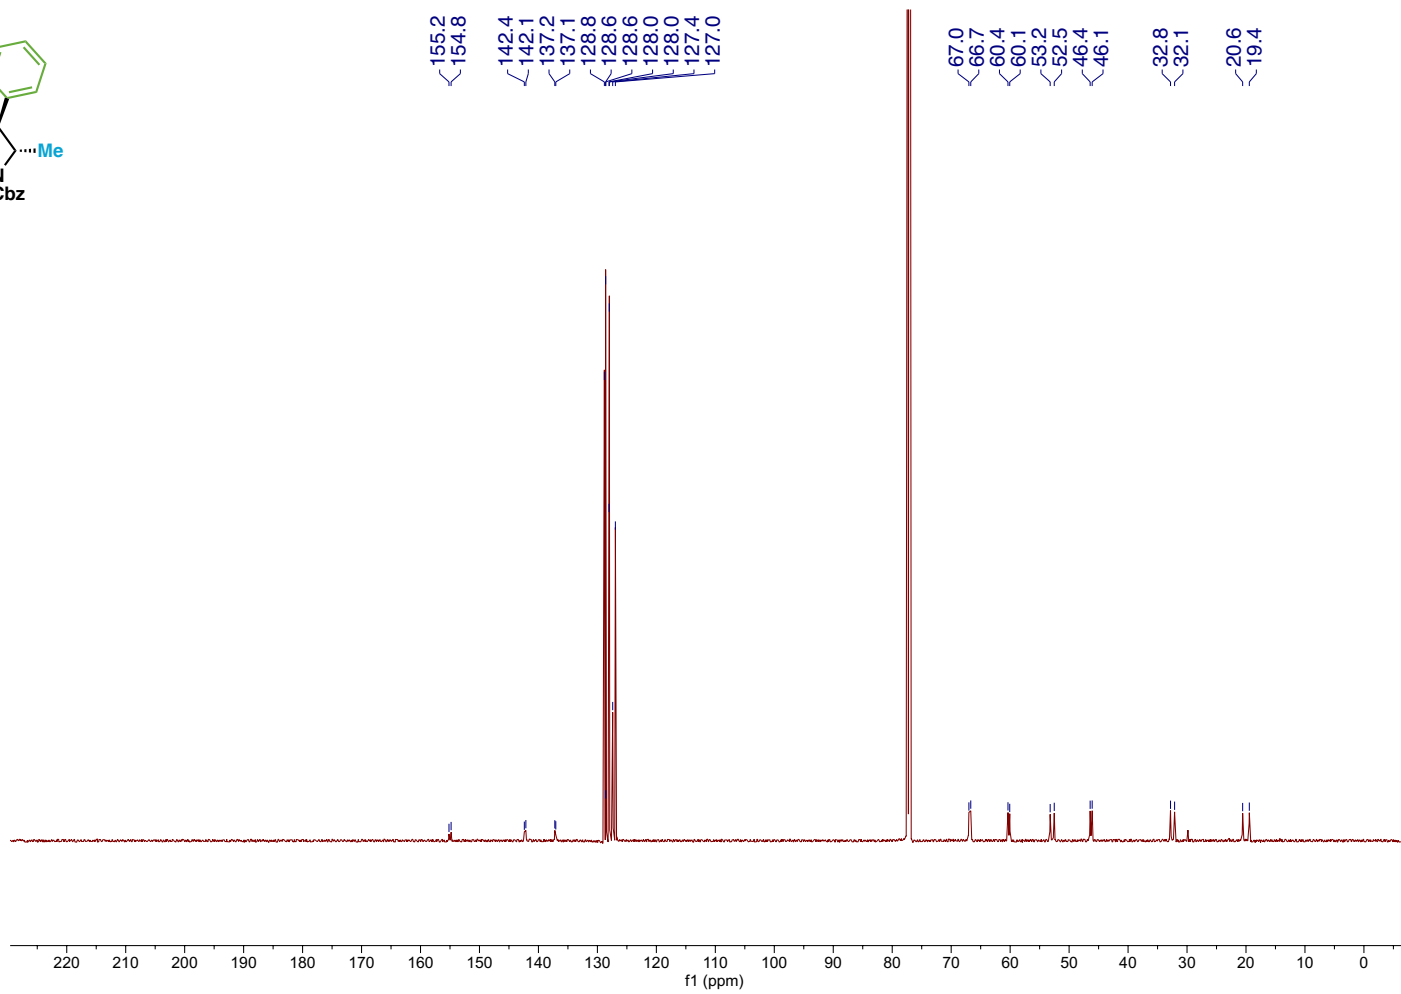

Compound SI-40 <sup>1</sup>H NMR

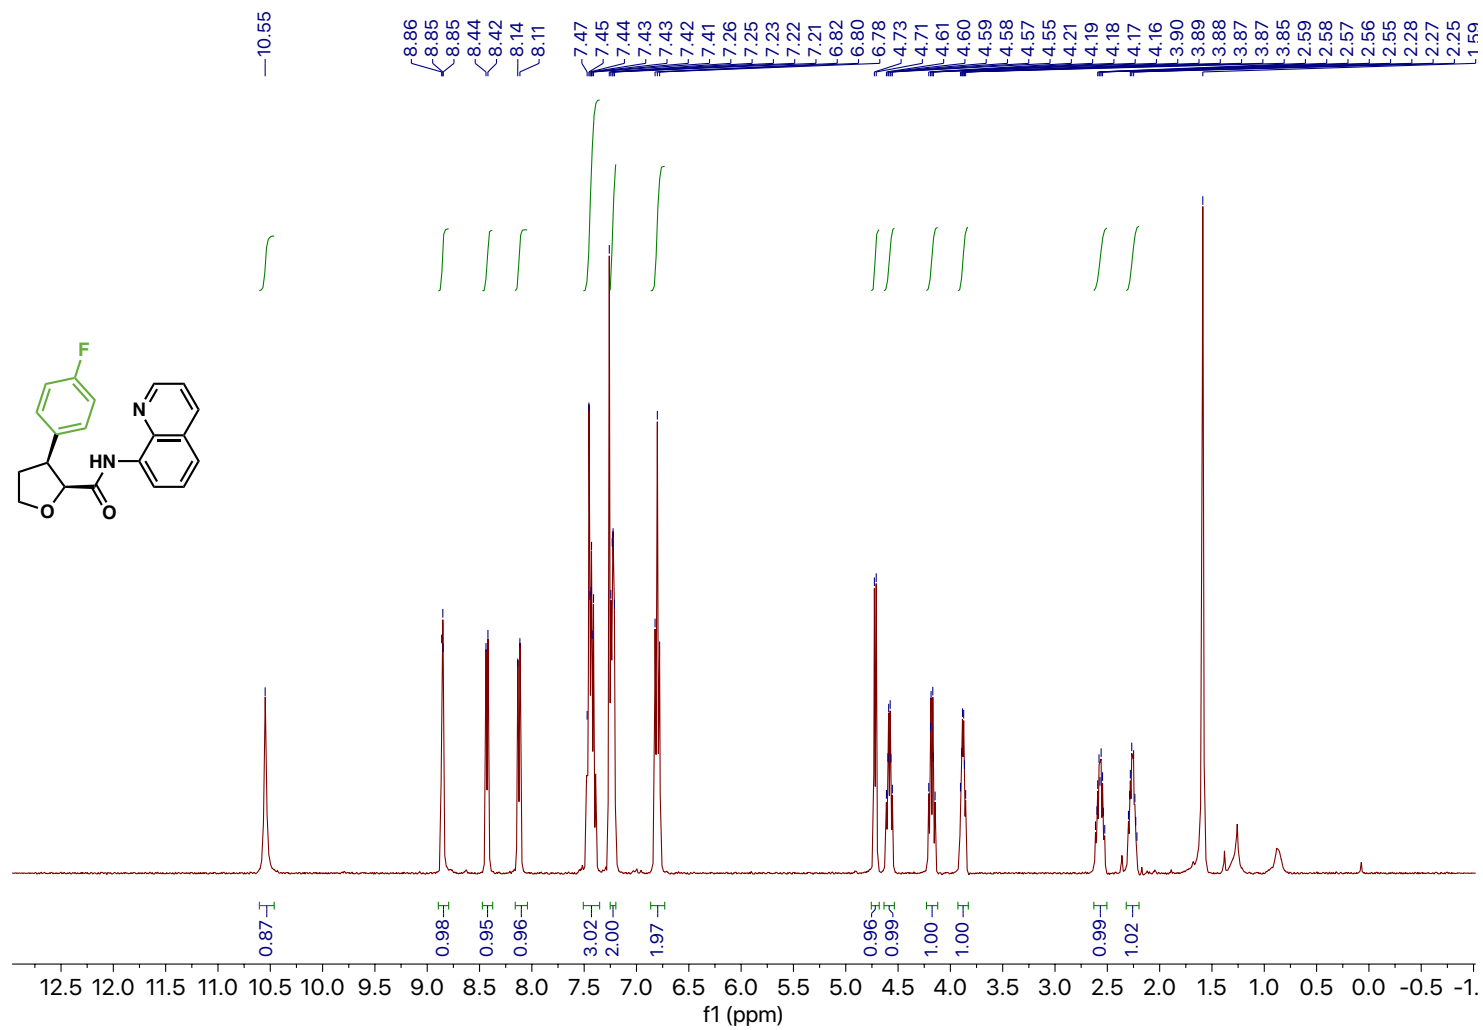

Compound SI-40  $^{19}\text{F}$  NMR

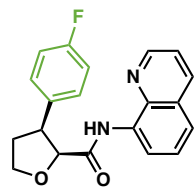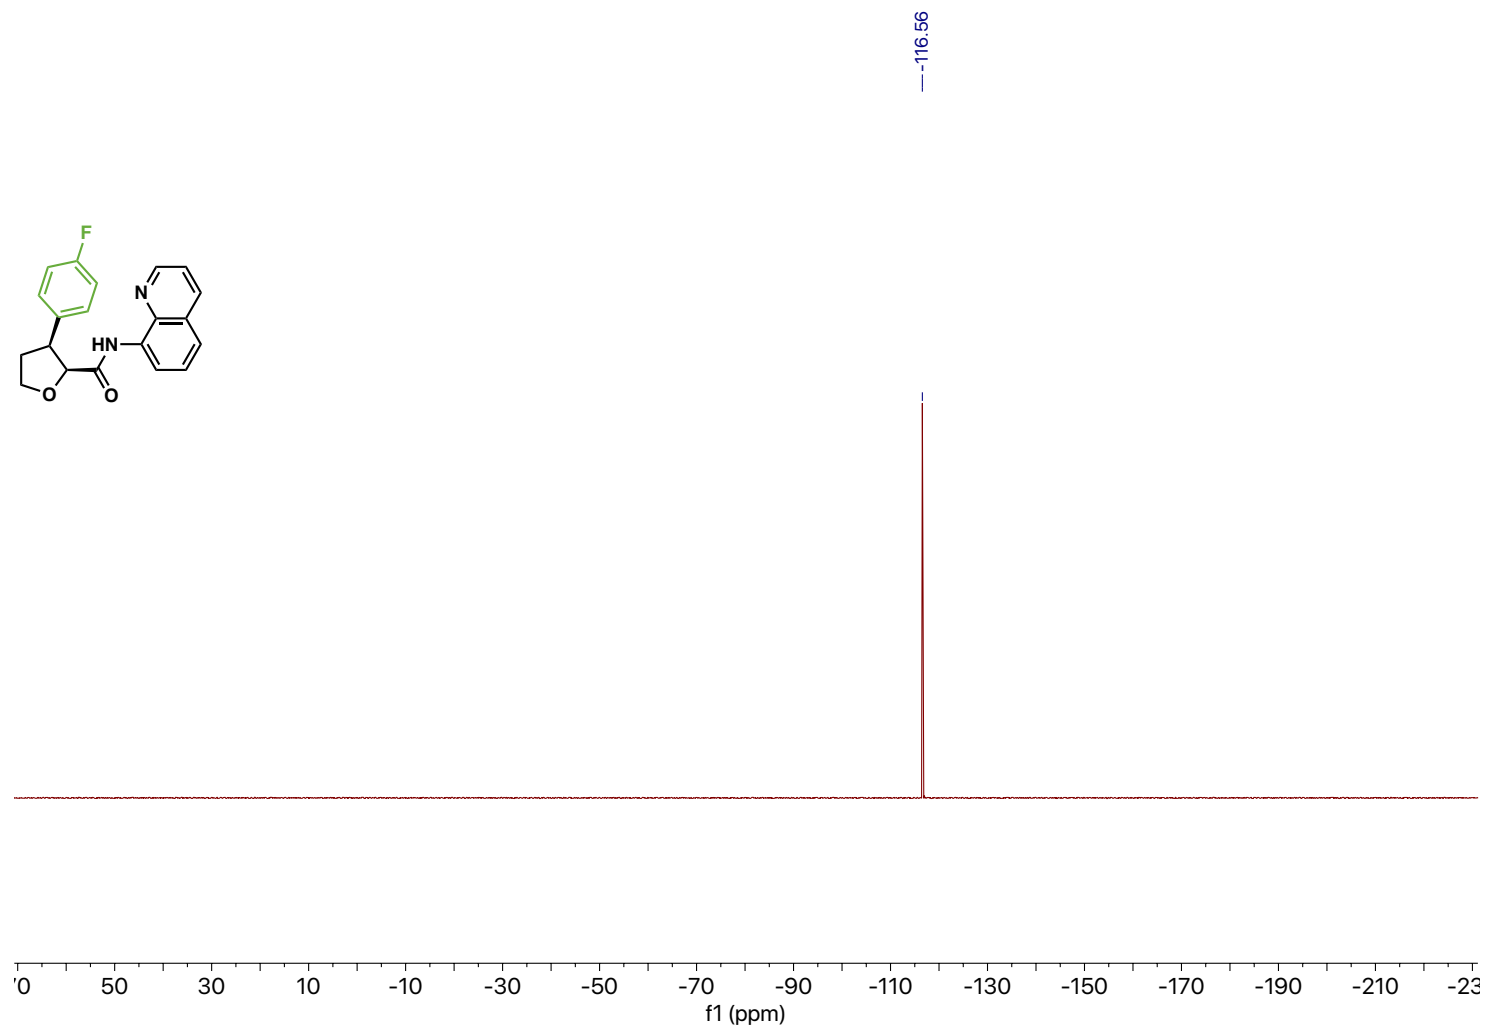

# Compound SI-40 <sup>13</sup>C NMR

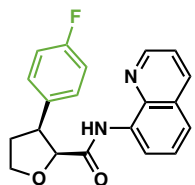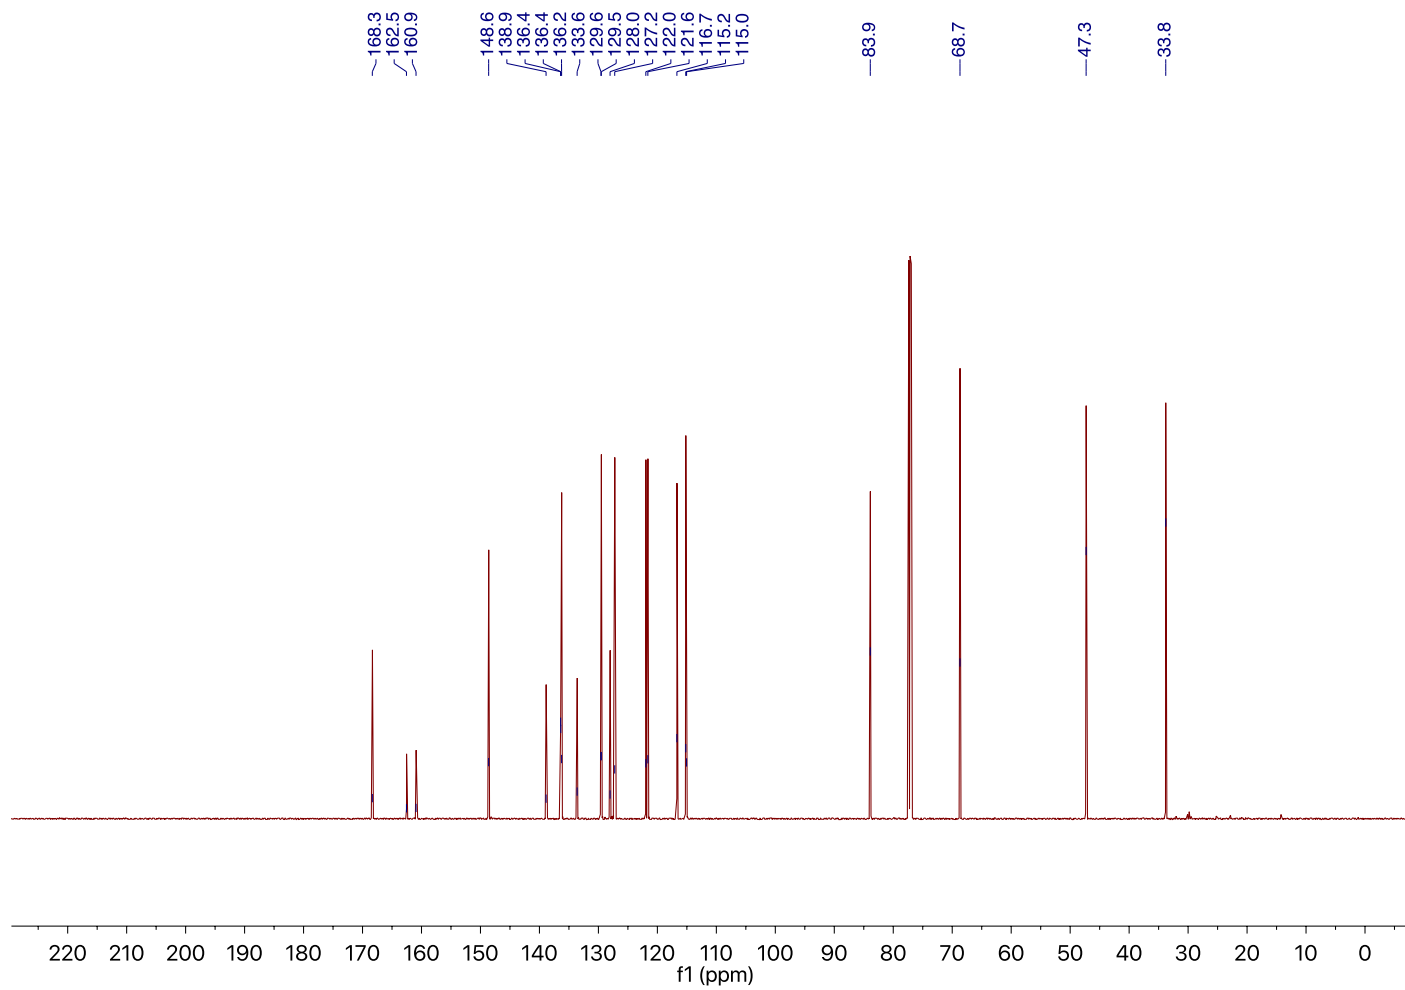

Compound SI-41 <sup>1</sup>H NMR

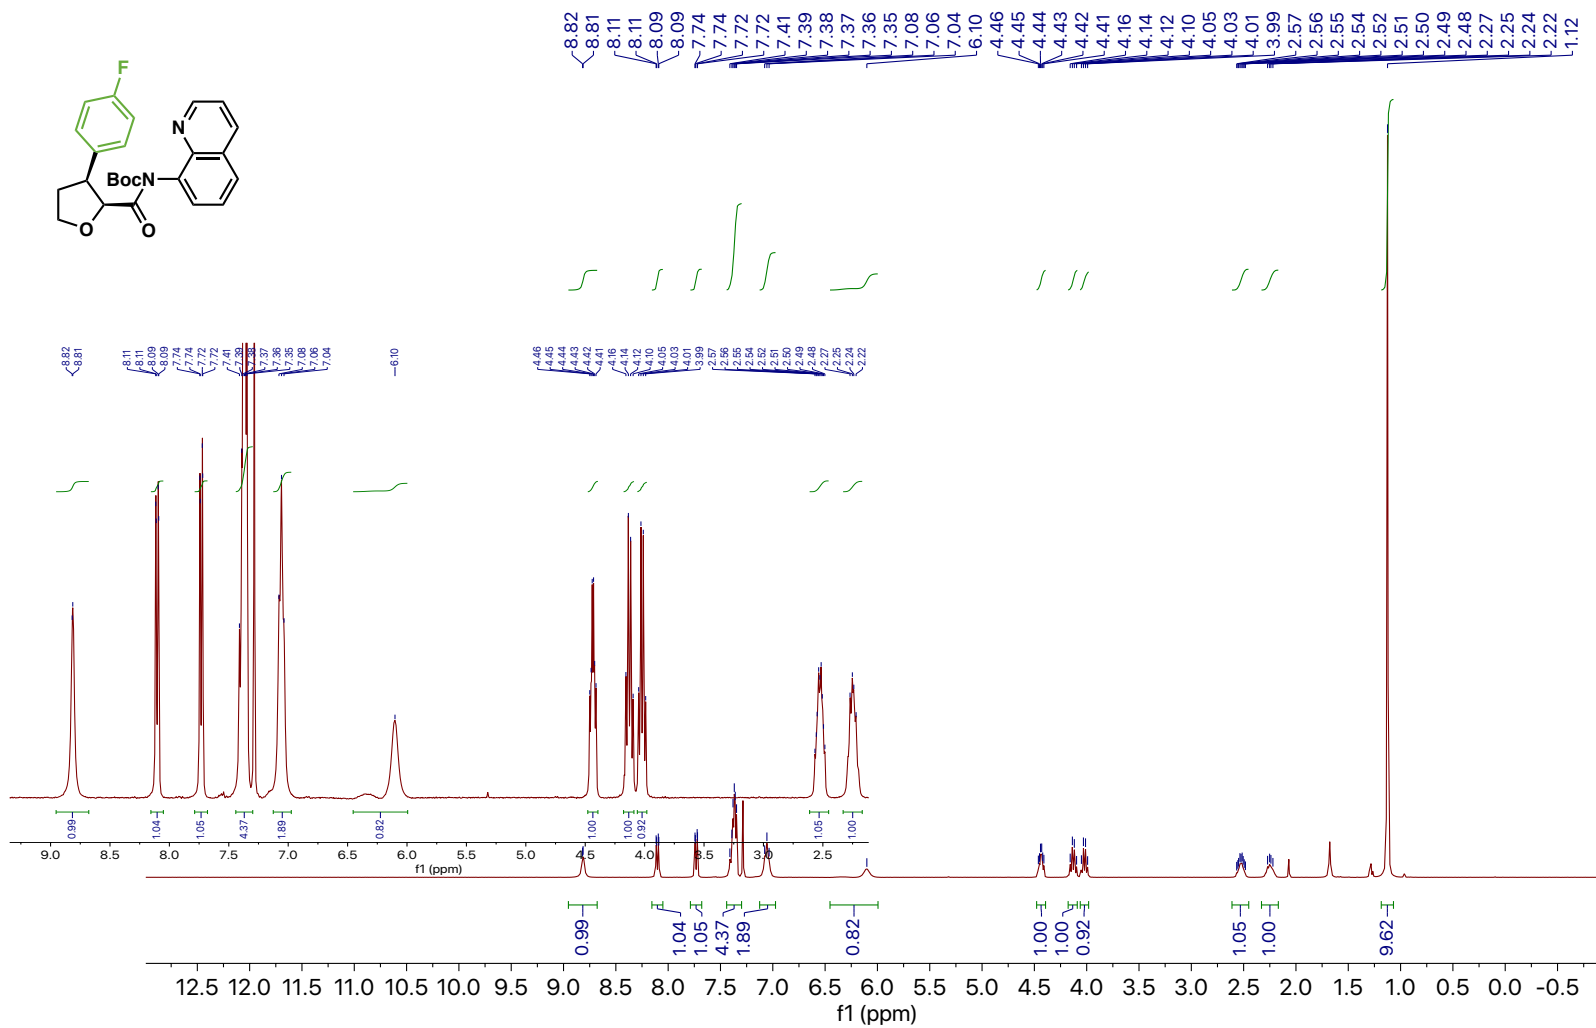

Compound SI-41 <sup>19</sup>F NMR

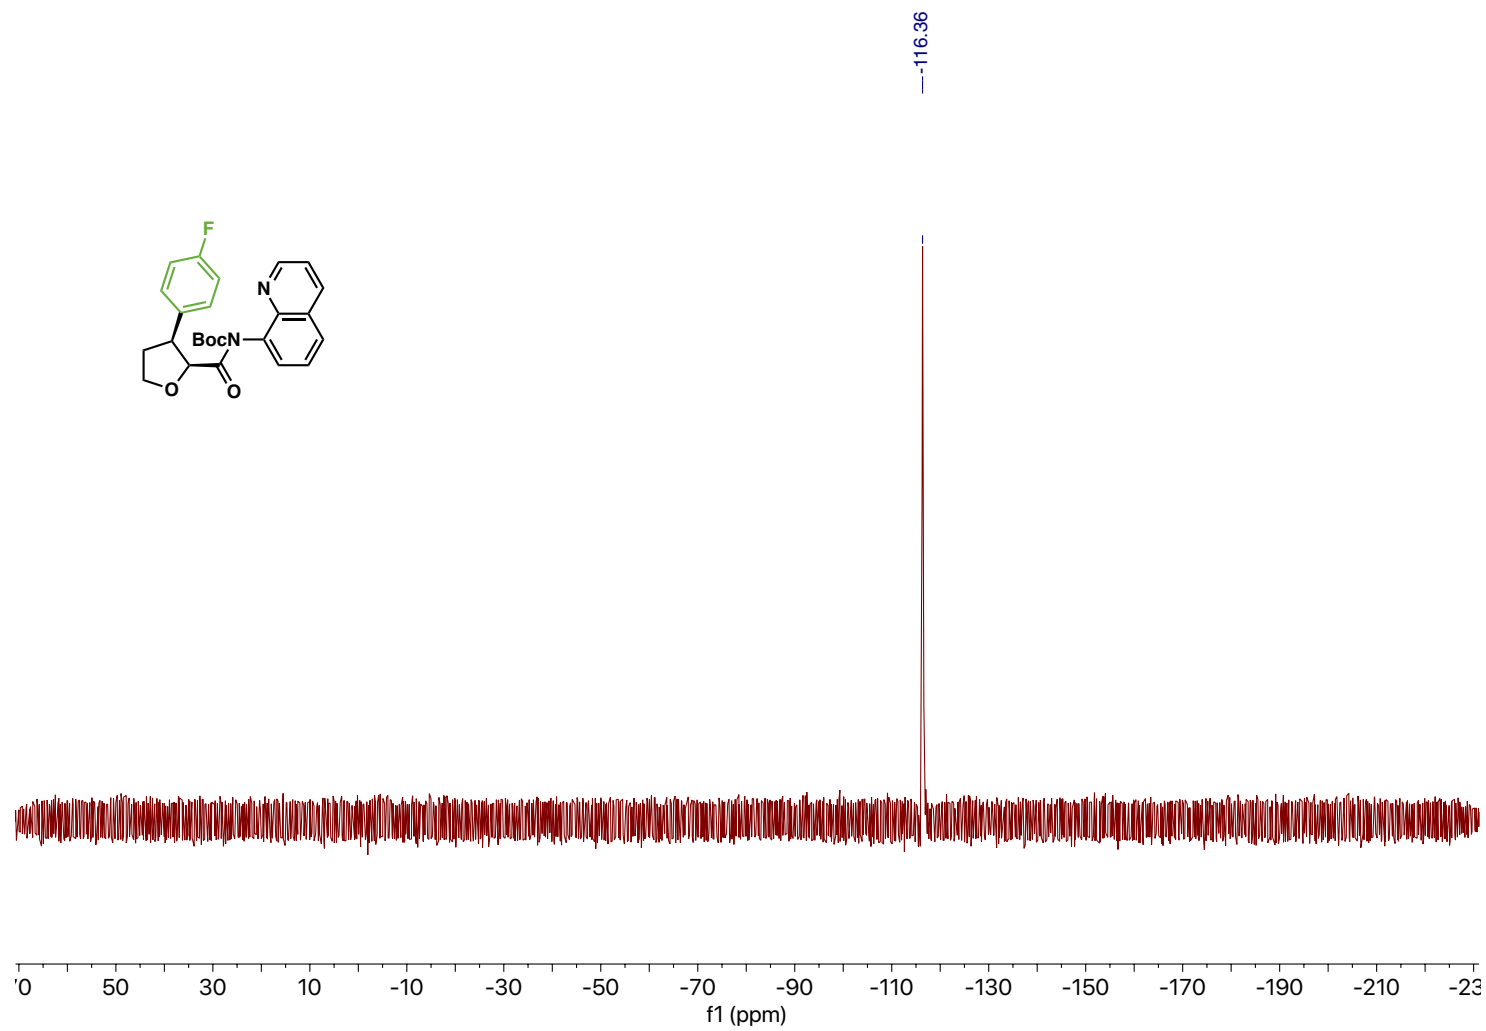



# Compound SI-41 <sup>13</sup>C NMR

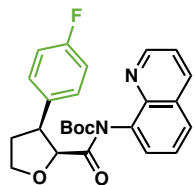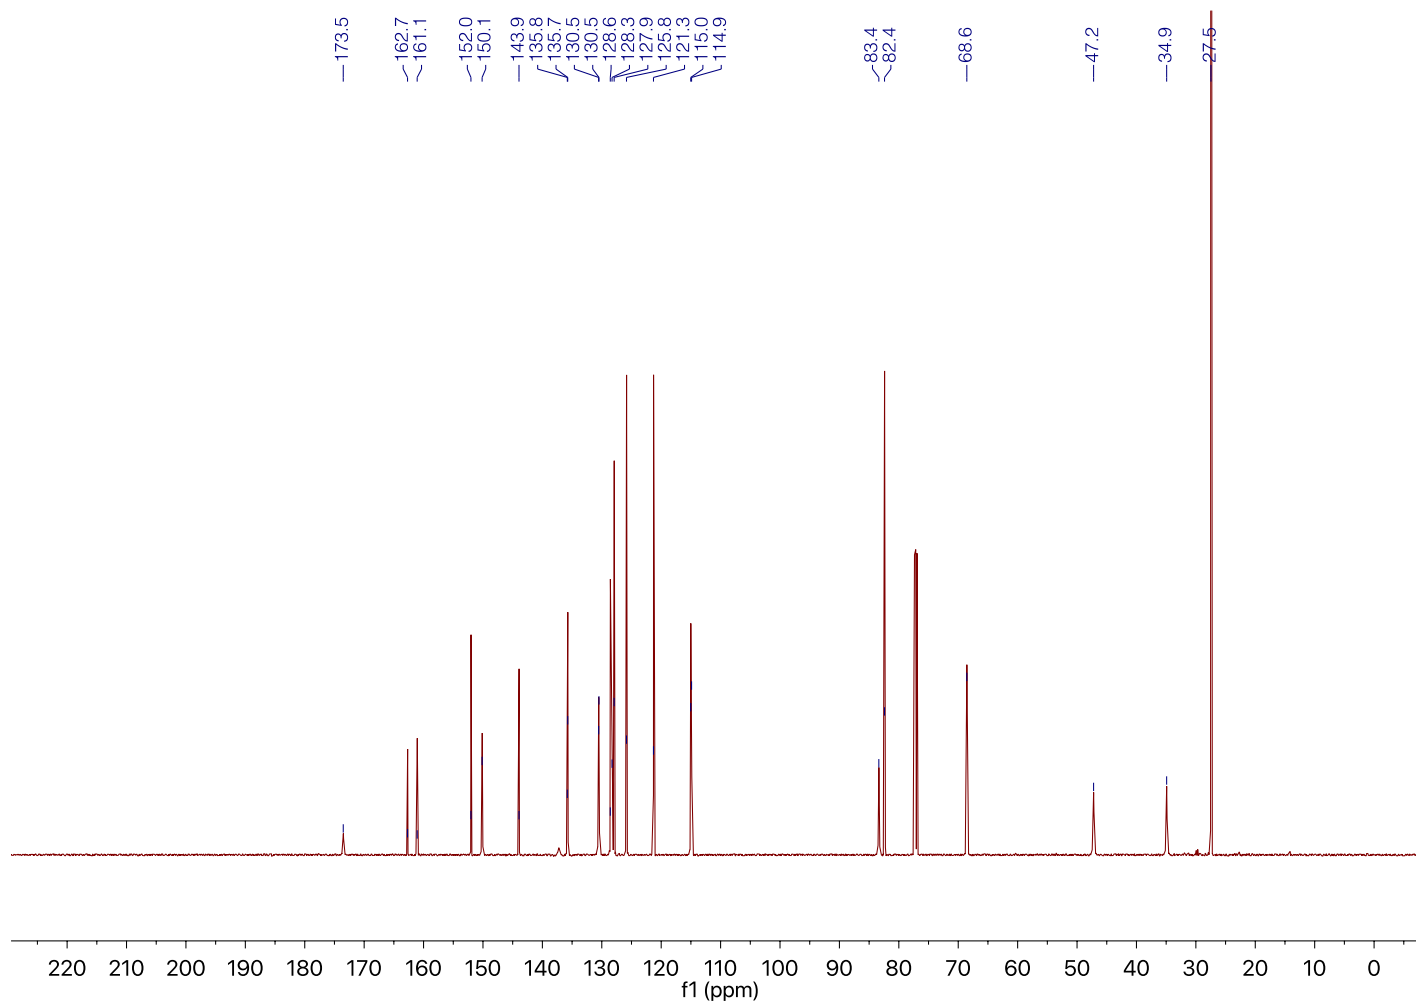

Compound A9 <sup>1</sup>H NMR

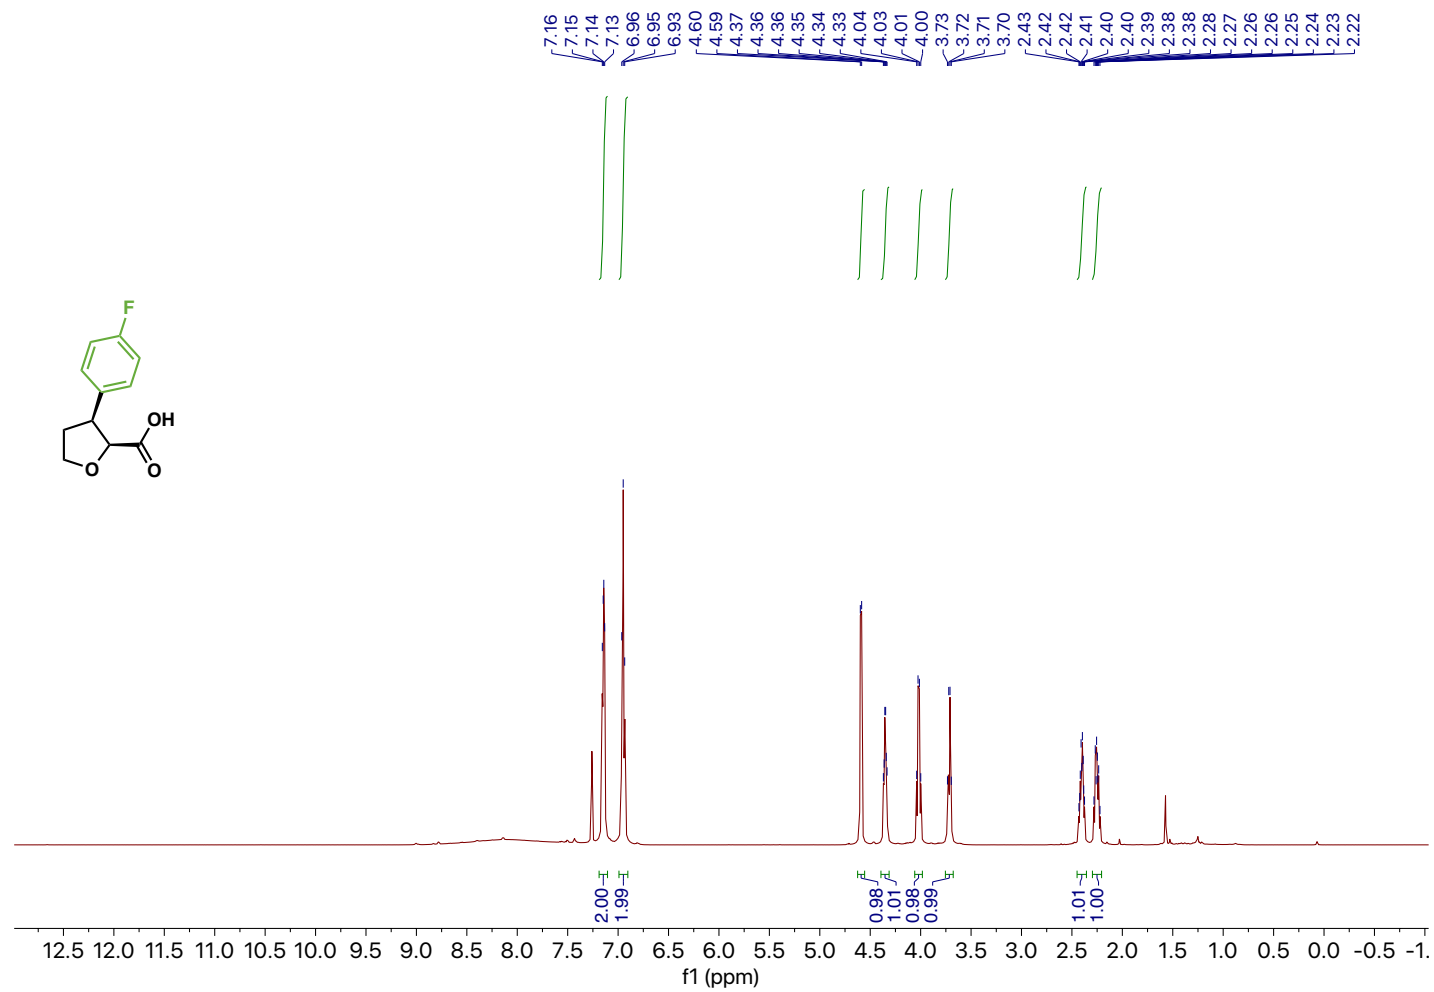

Compound A9  $^{19}\text{F}$  NMR

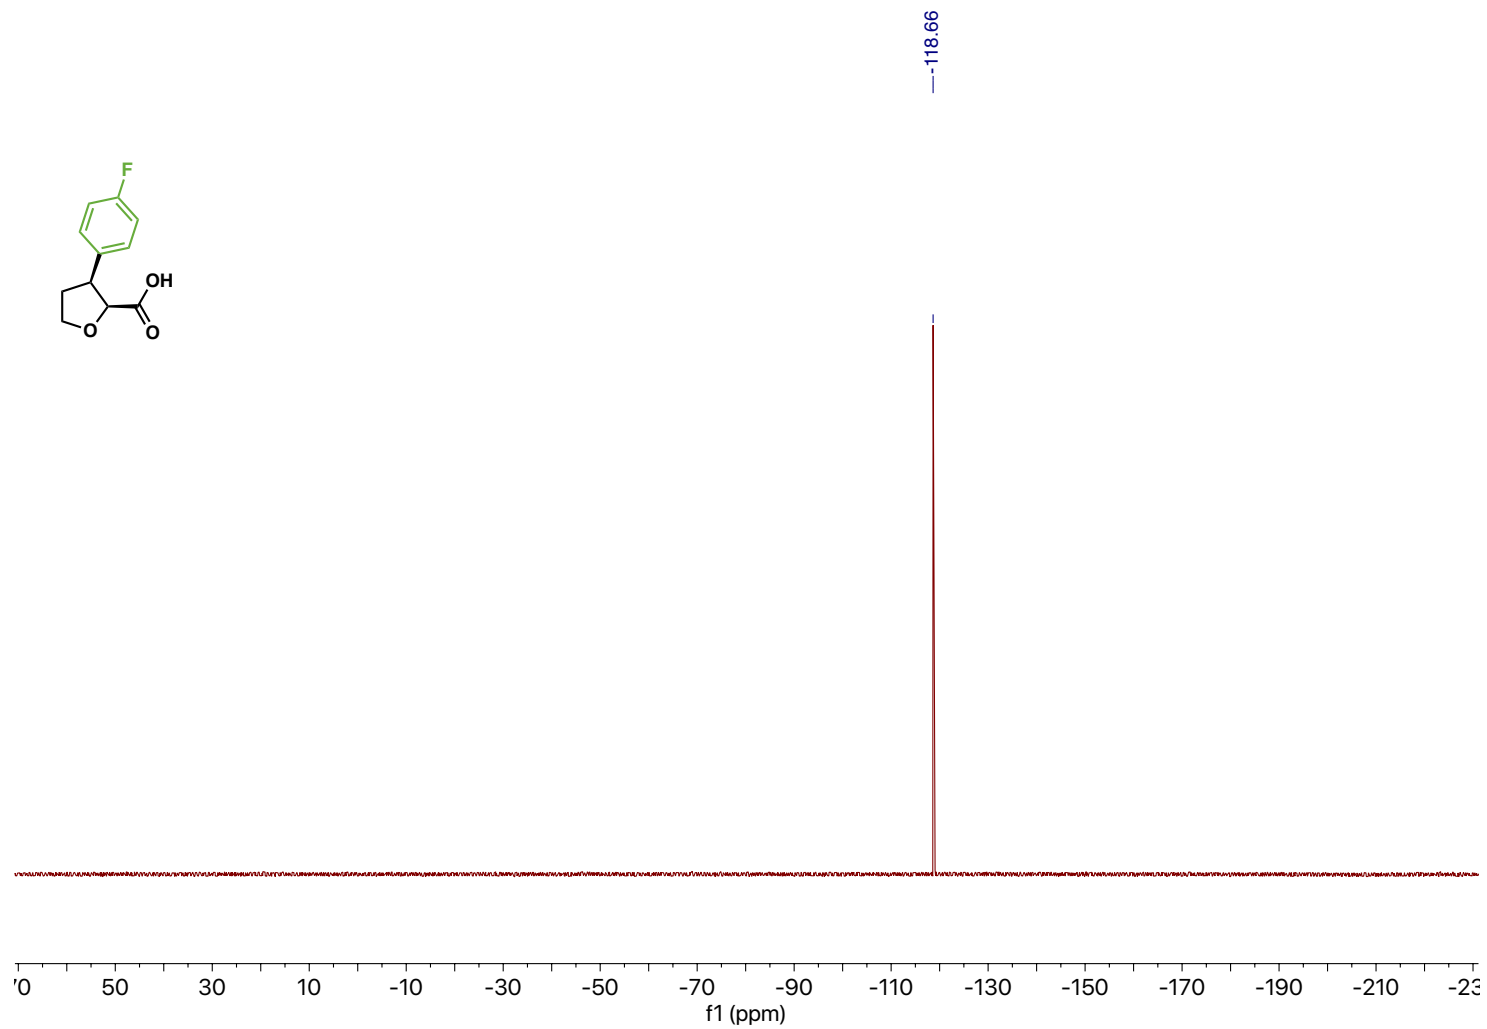

Compound A9 <sup>13</sup>C NMR

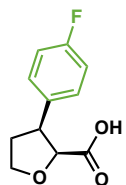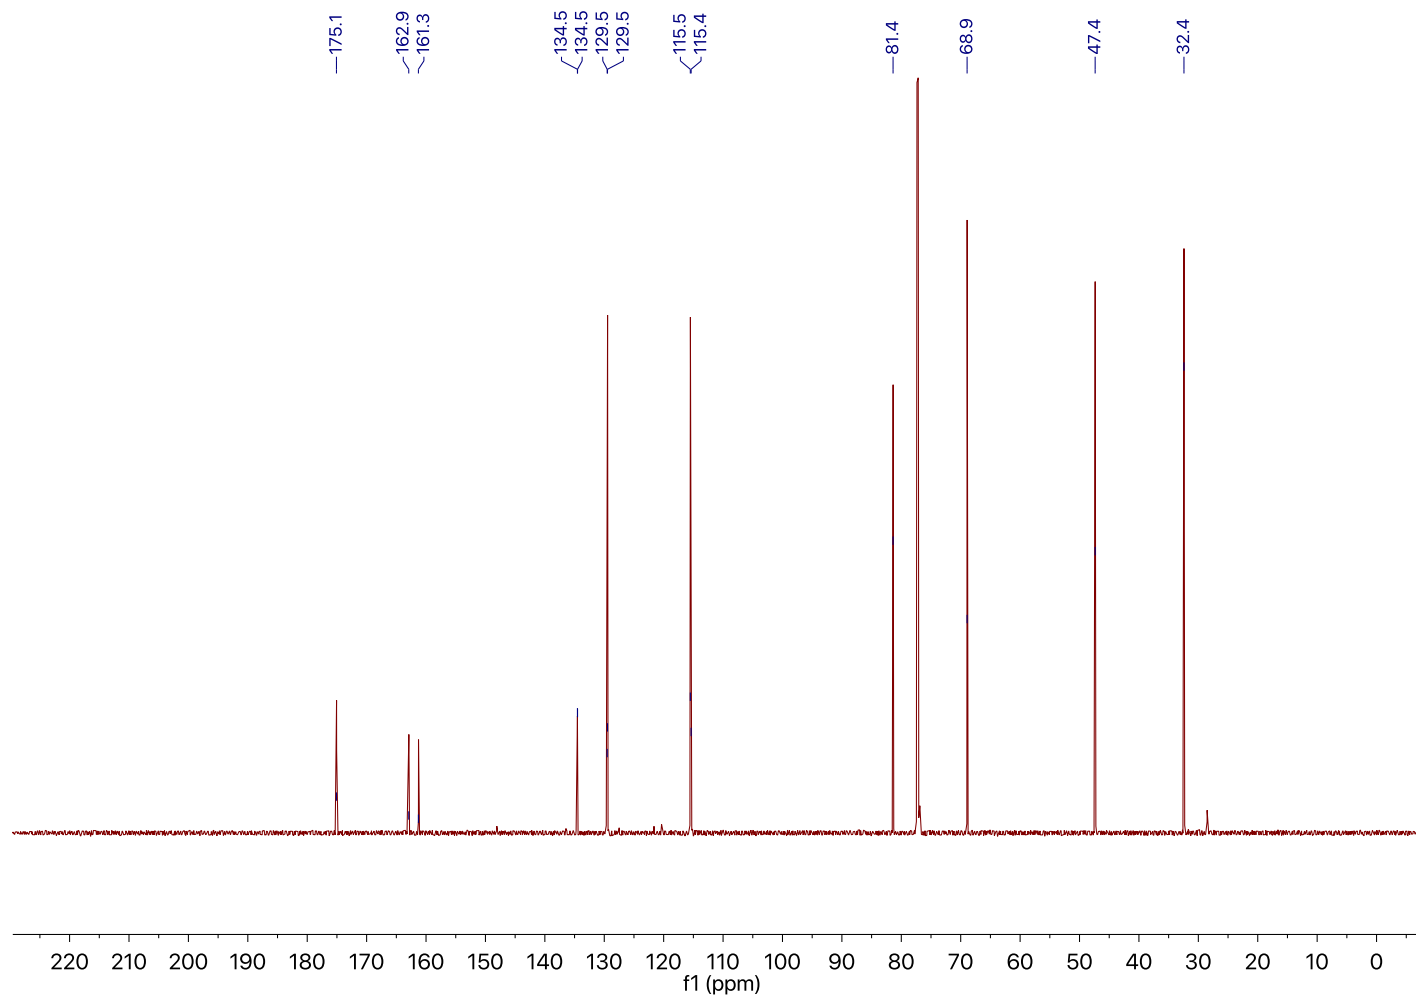

Compound B12 <sup>1</sup>H NMR

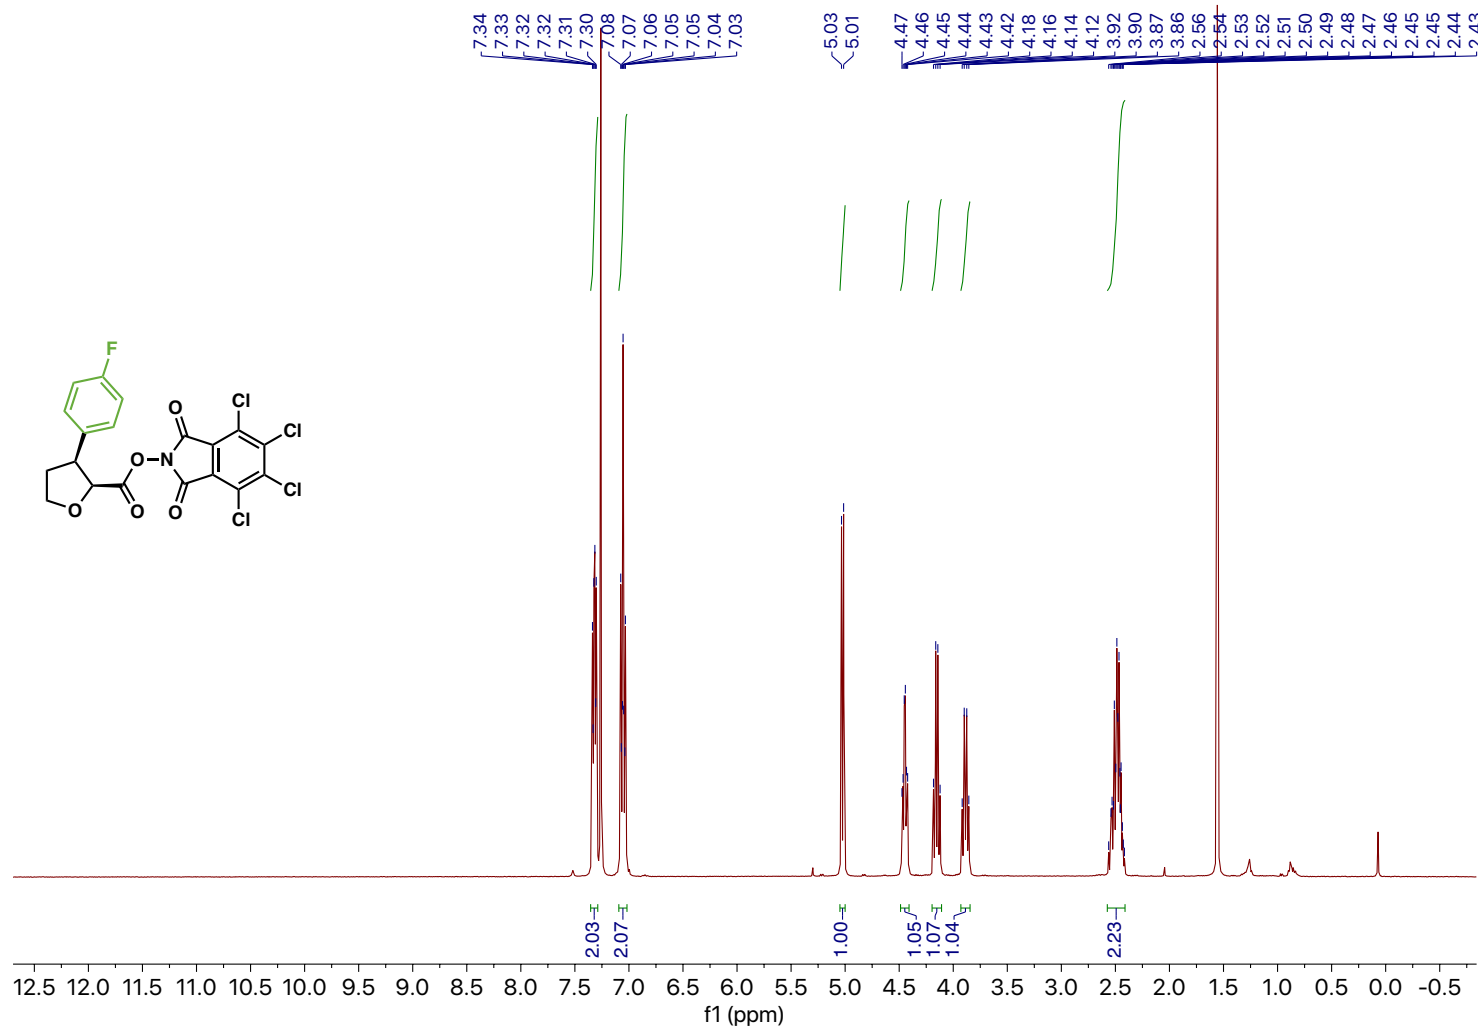

Compound B12 <sup>19</sup>F NMR

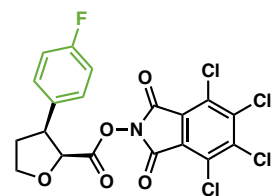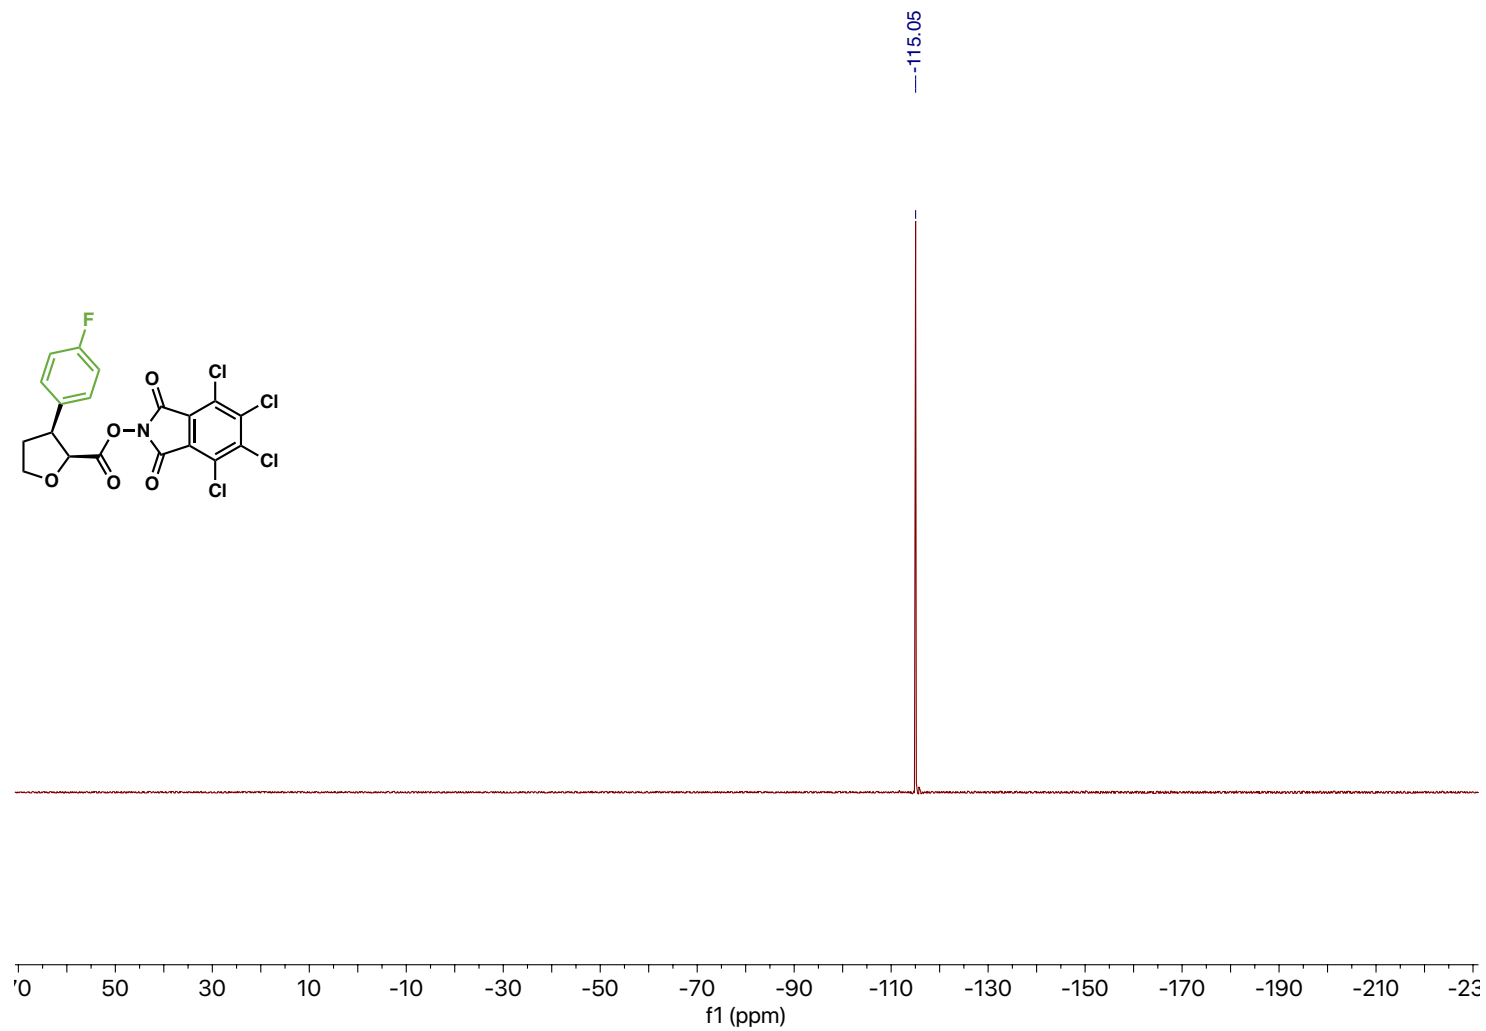

Compound B12 <sup>13</sup>C NMR

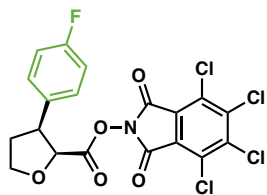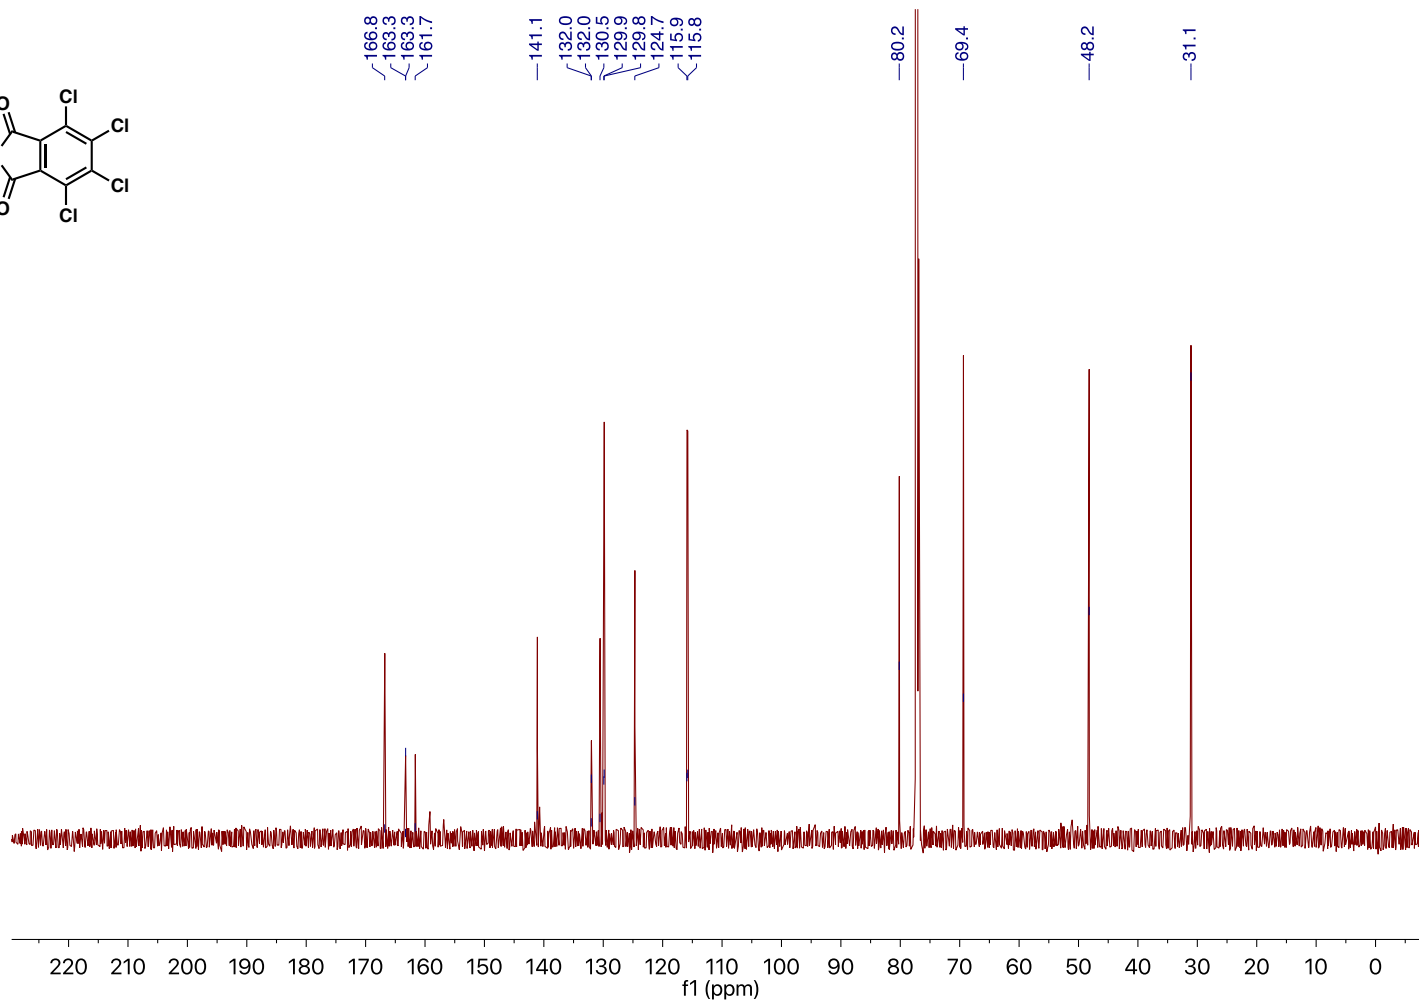

Compound 46 <sup>1</sup>H NMR

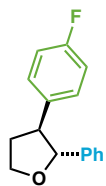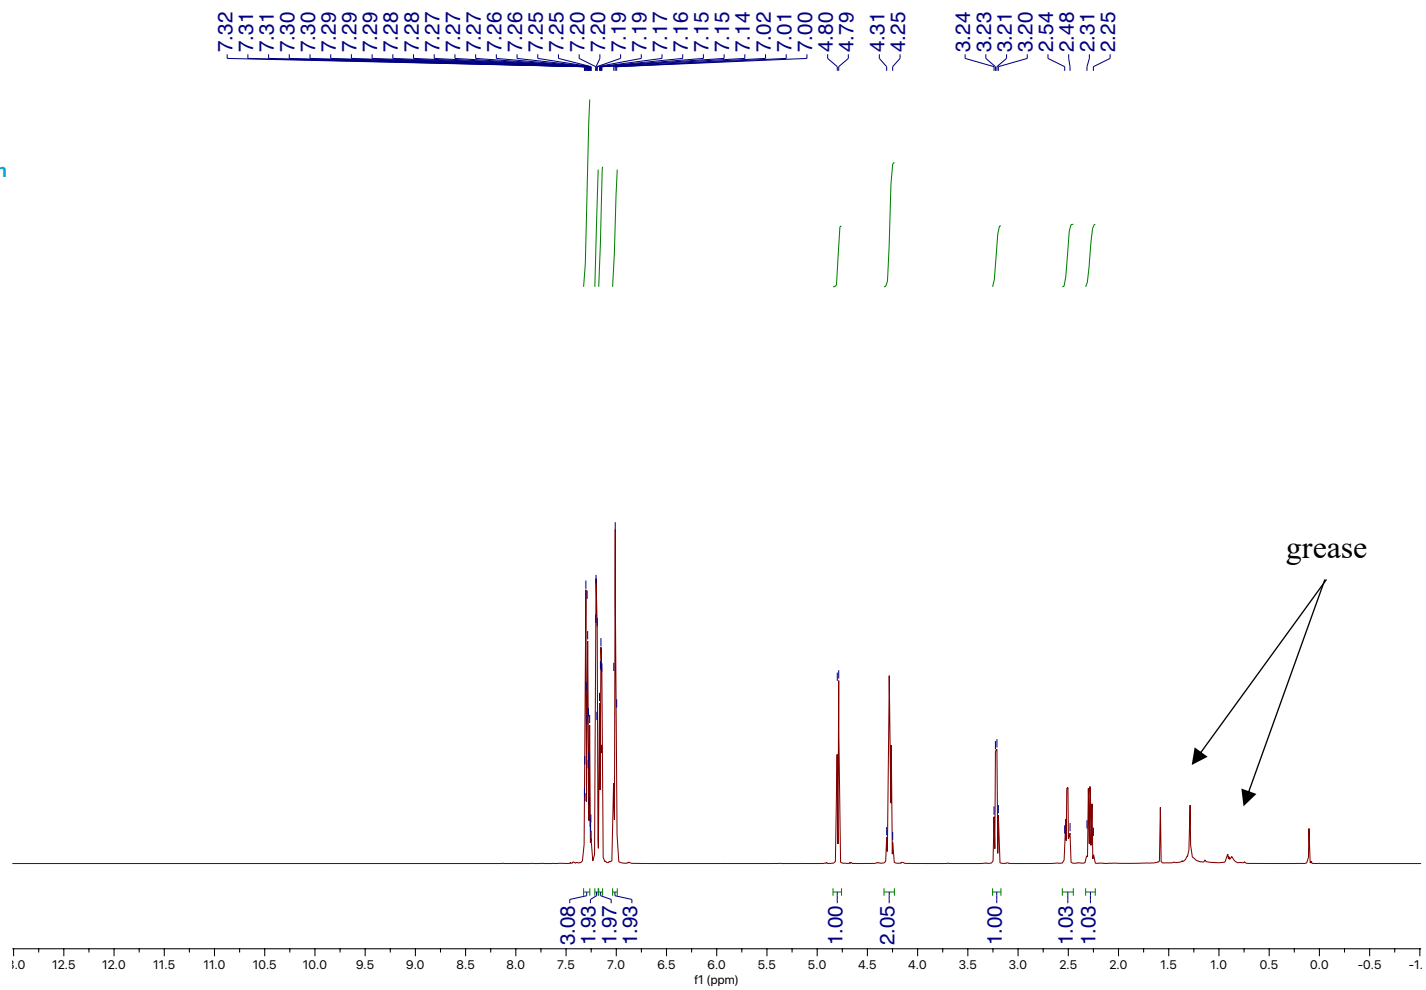



Compound 46  $^{19}\text{F}$  NMR

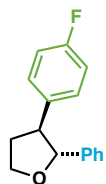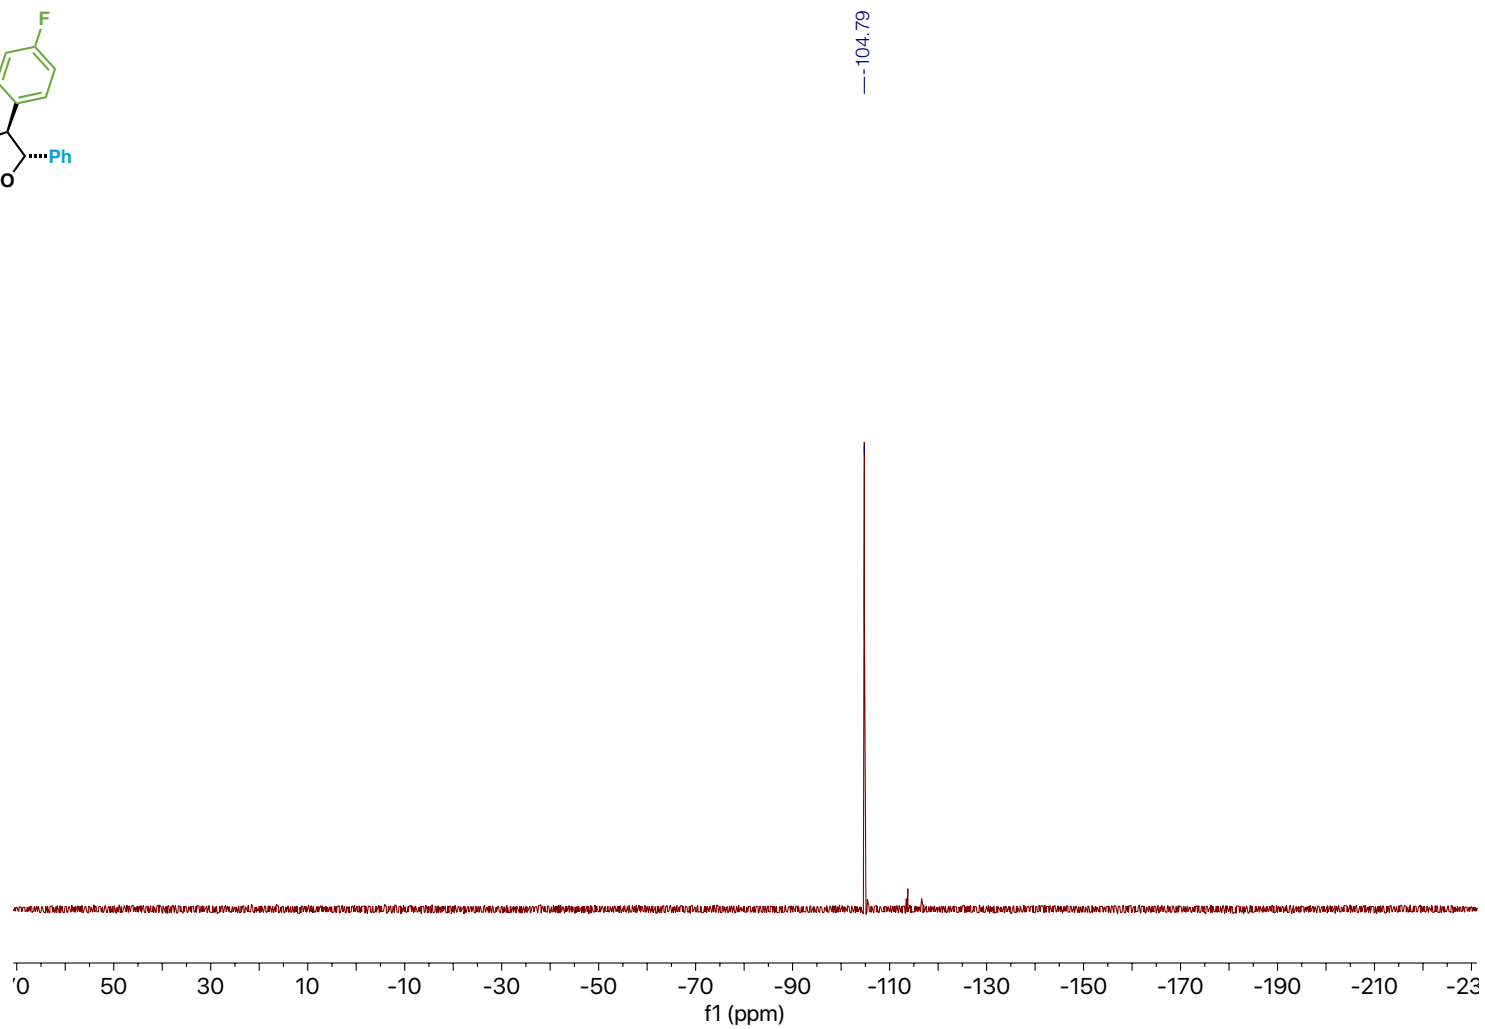

S353

Compound 46 <sup>13</sup>C NMR

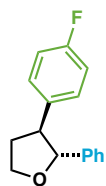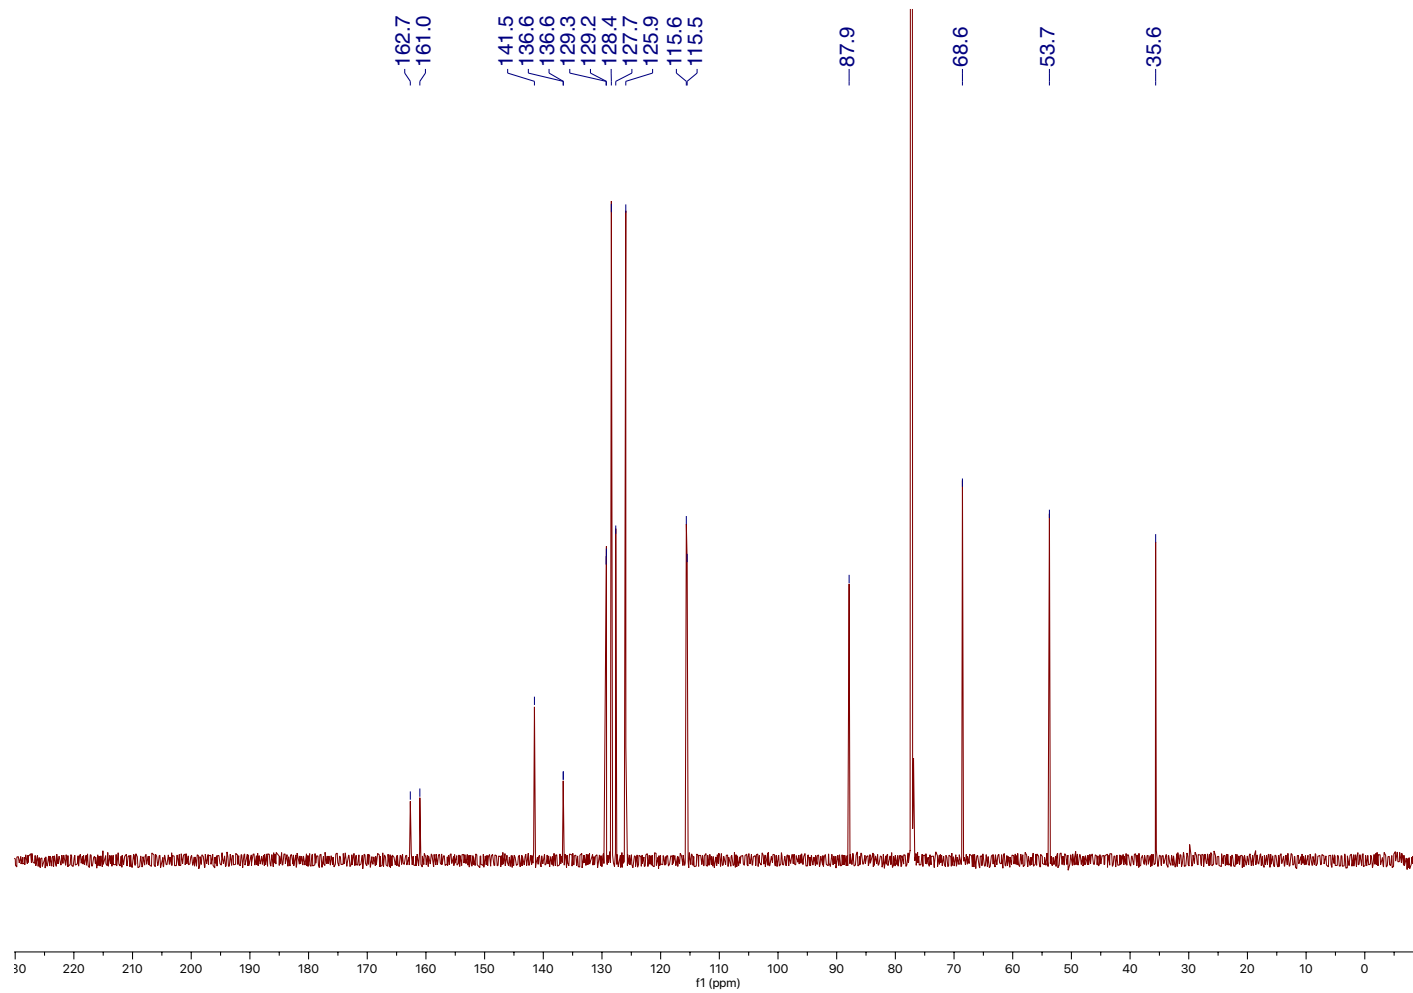

Compound 47 <sup>1</sup>H NMR

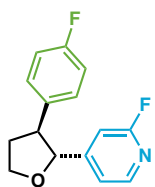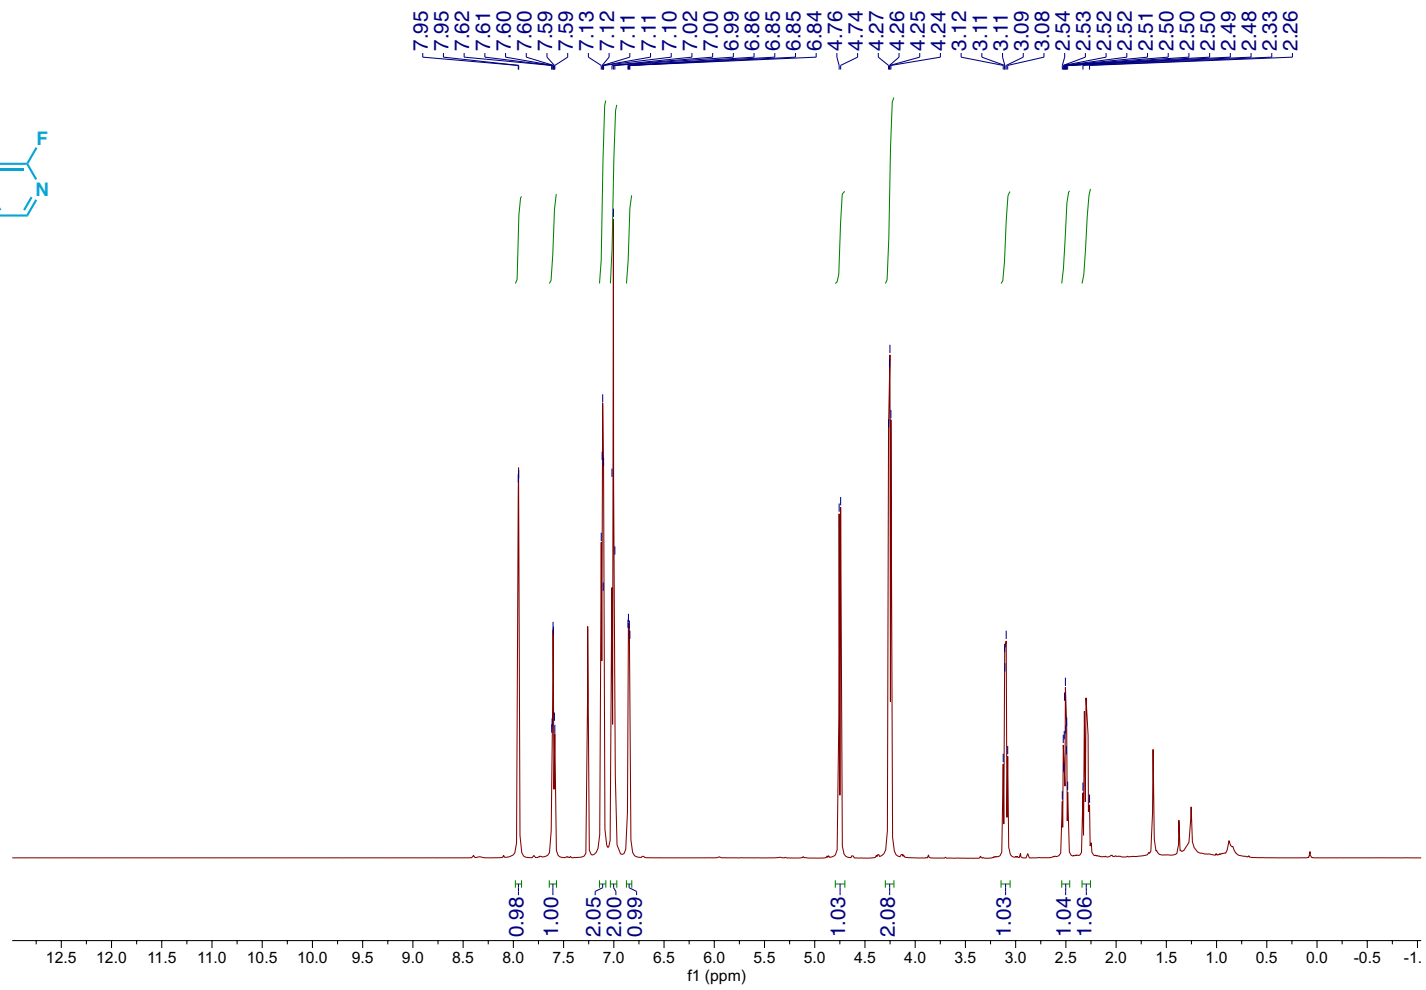

Compound 47  $^{19}\text{F}$  NMR

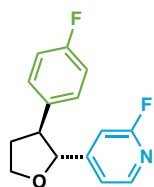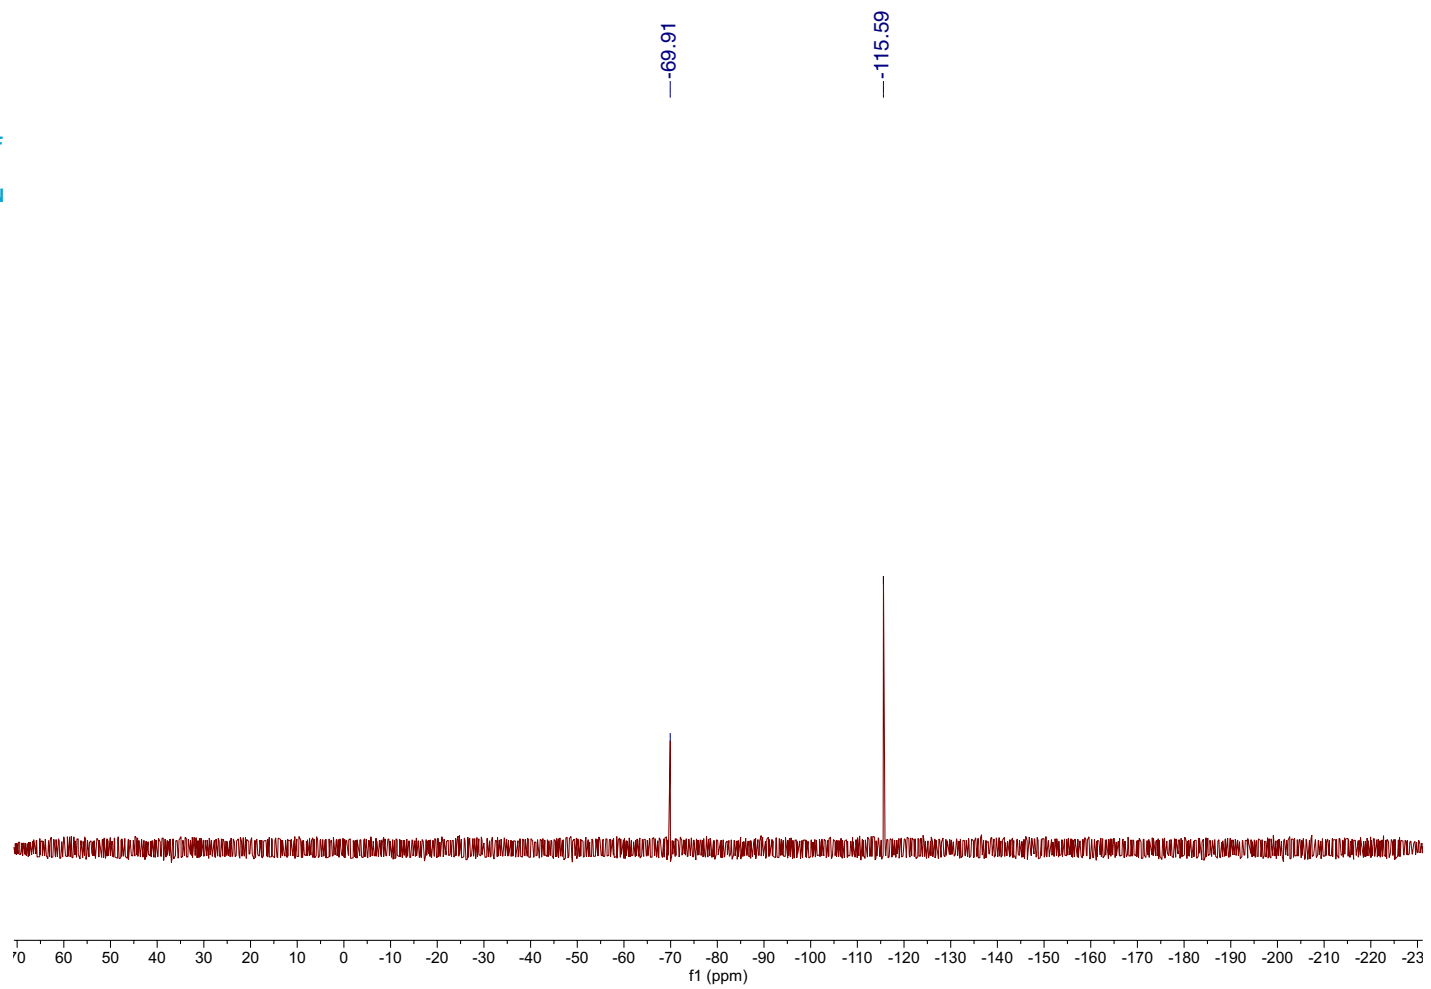

Compound 47 <sup>13</sup>C NMR

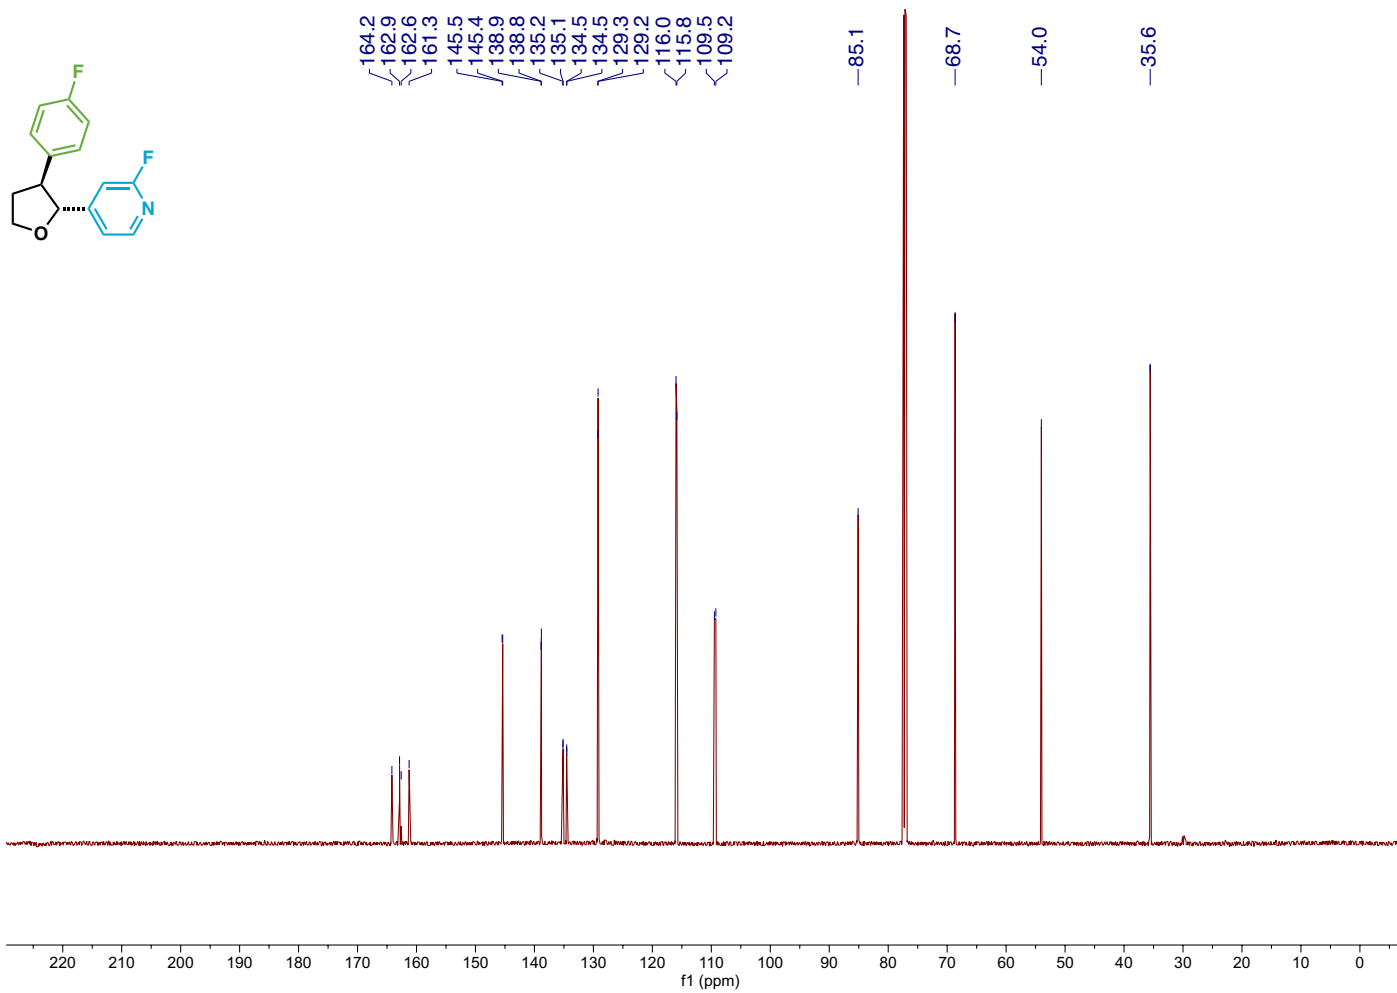

Compound 48 <sup>1</sup>H NMR

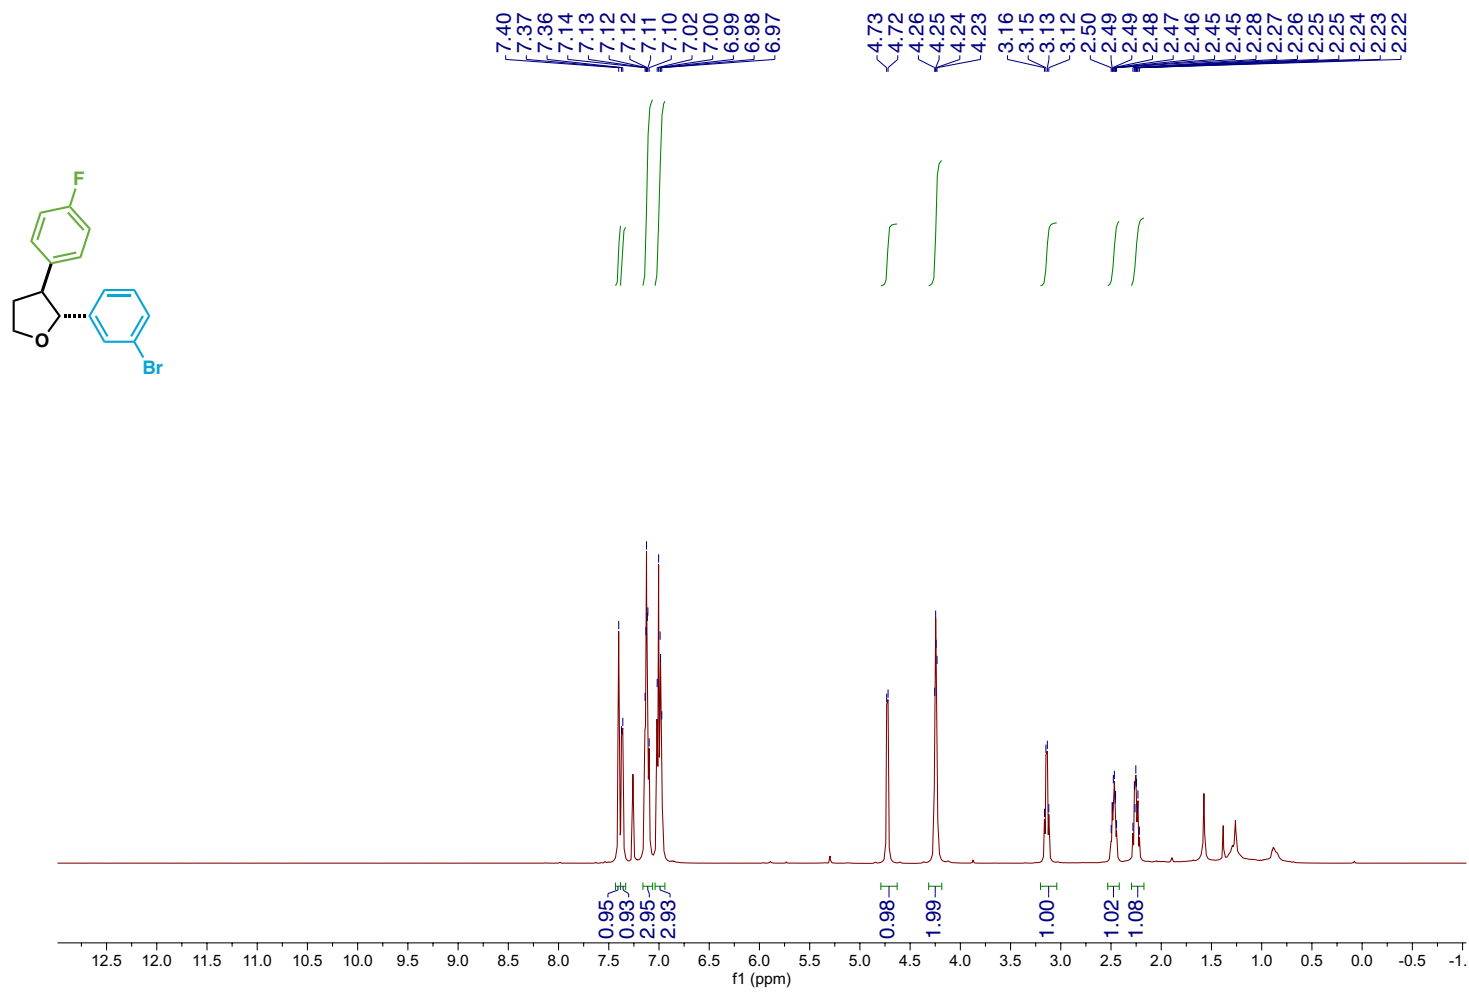

Compound 48  $^{19}\text{F}$  NMR

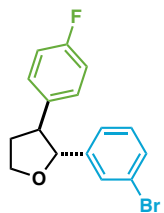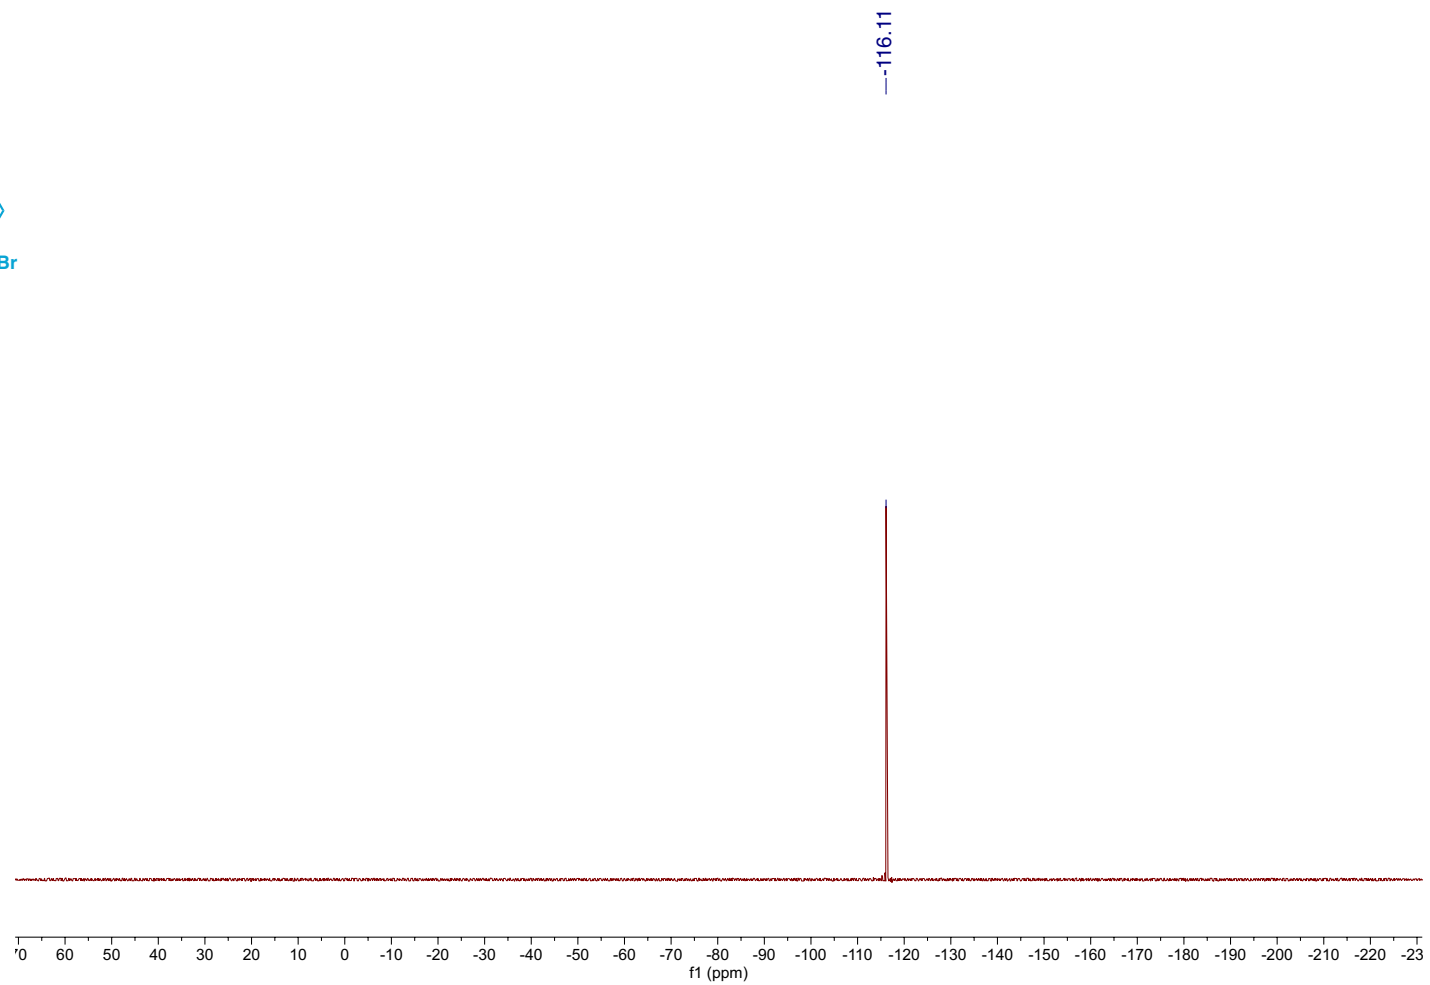

Compound 48 <sup>13</sup>C NMR

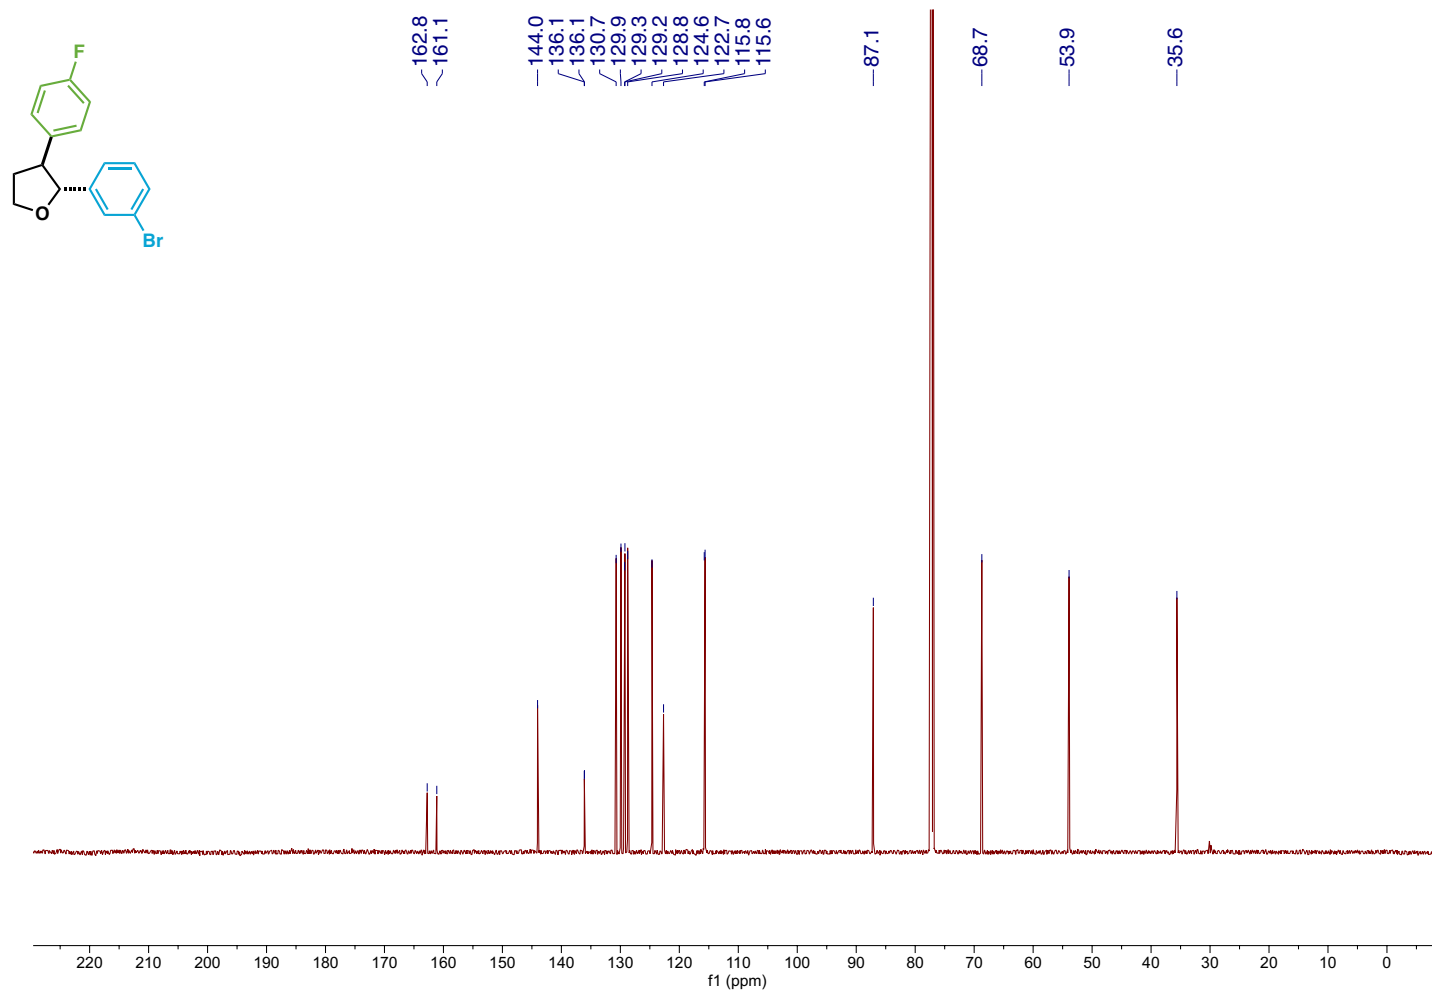



Compound 49 <sup>1</sup>H NMR

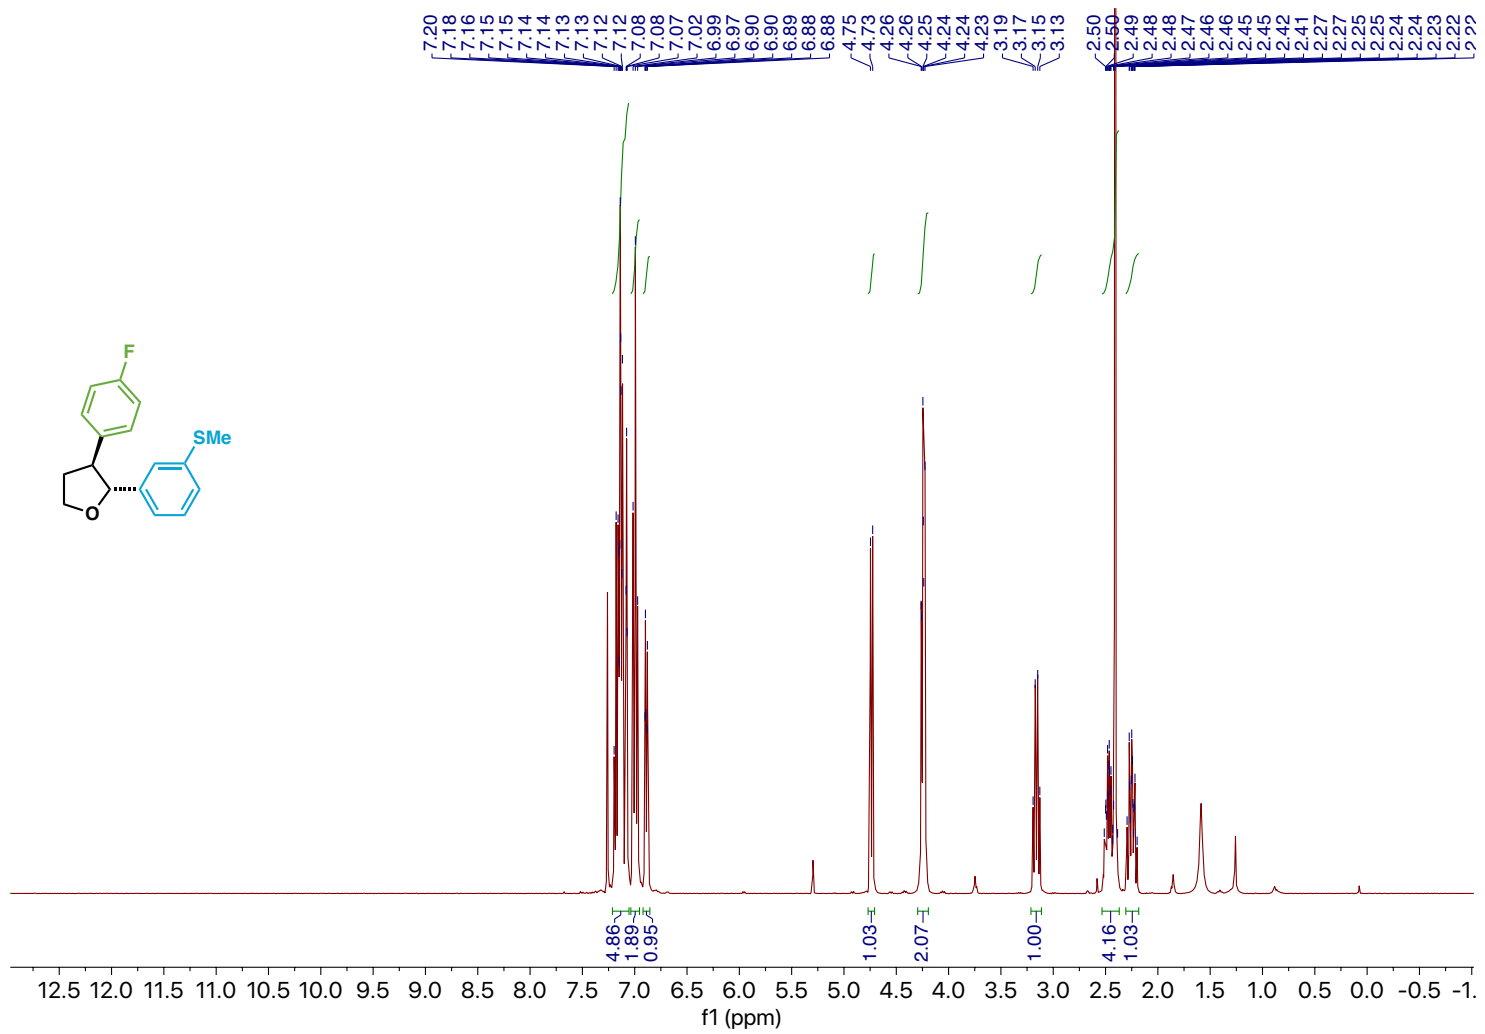

Compound 49 <sup>19</sup>F NMR

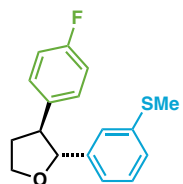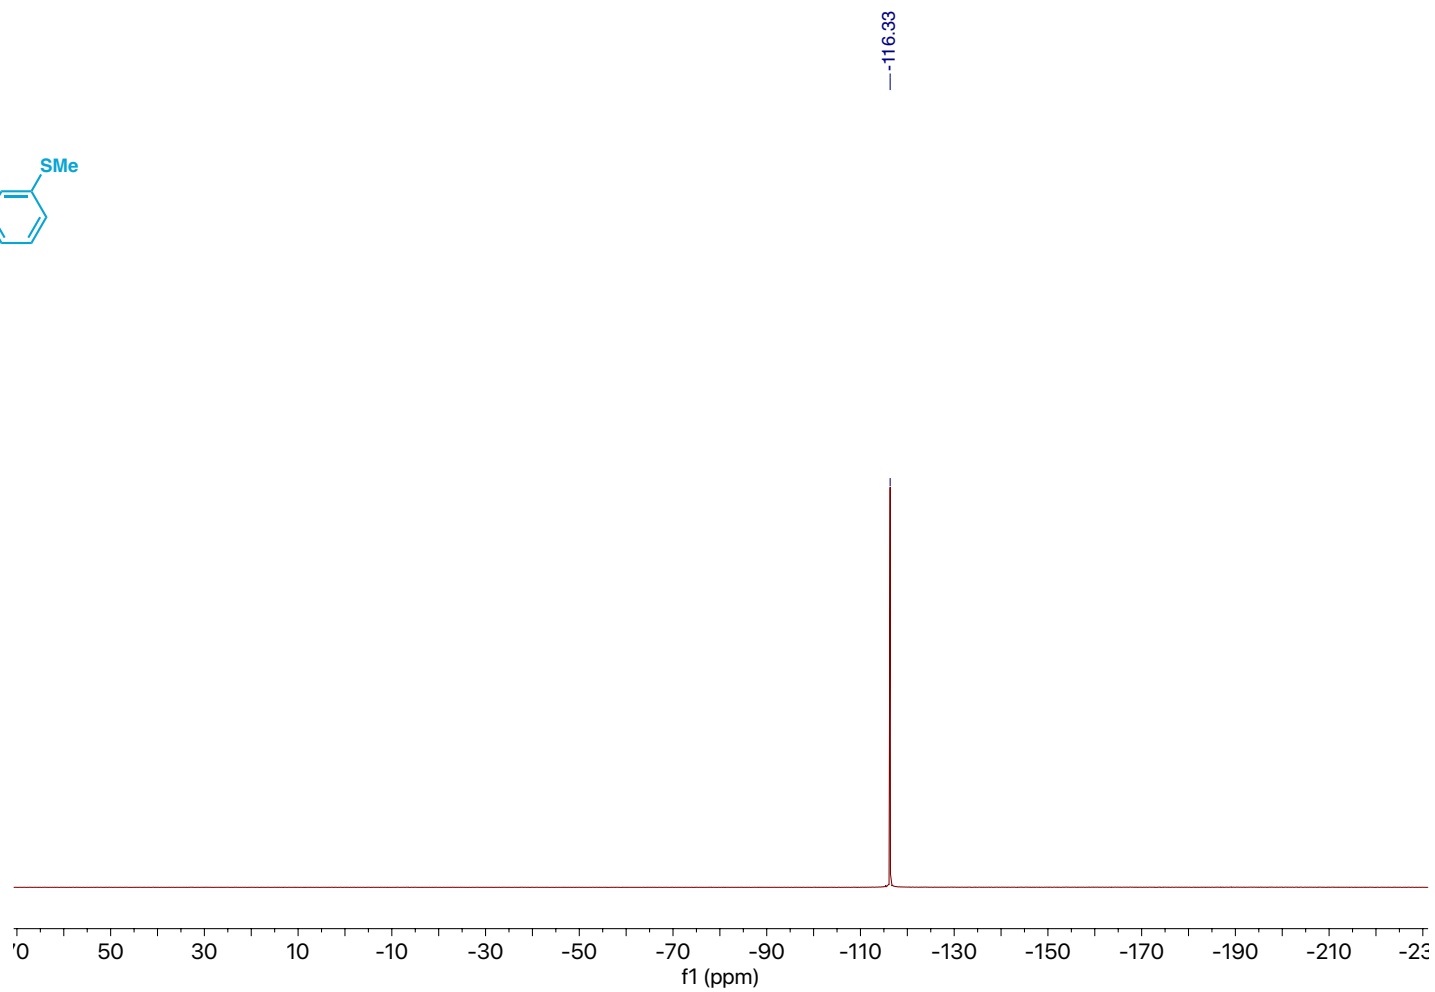

Compound 49 <sup>13</sup>C NMR

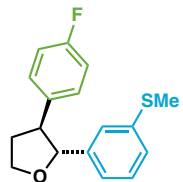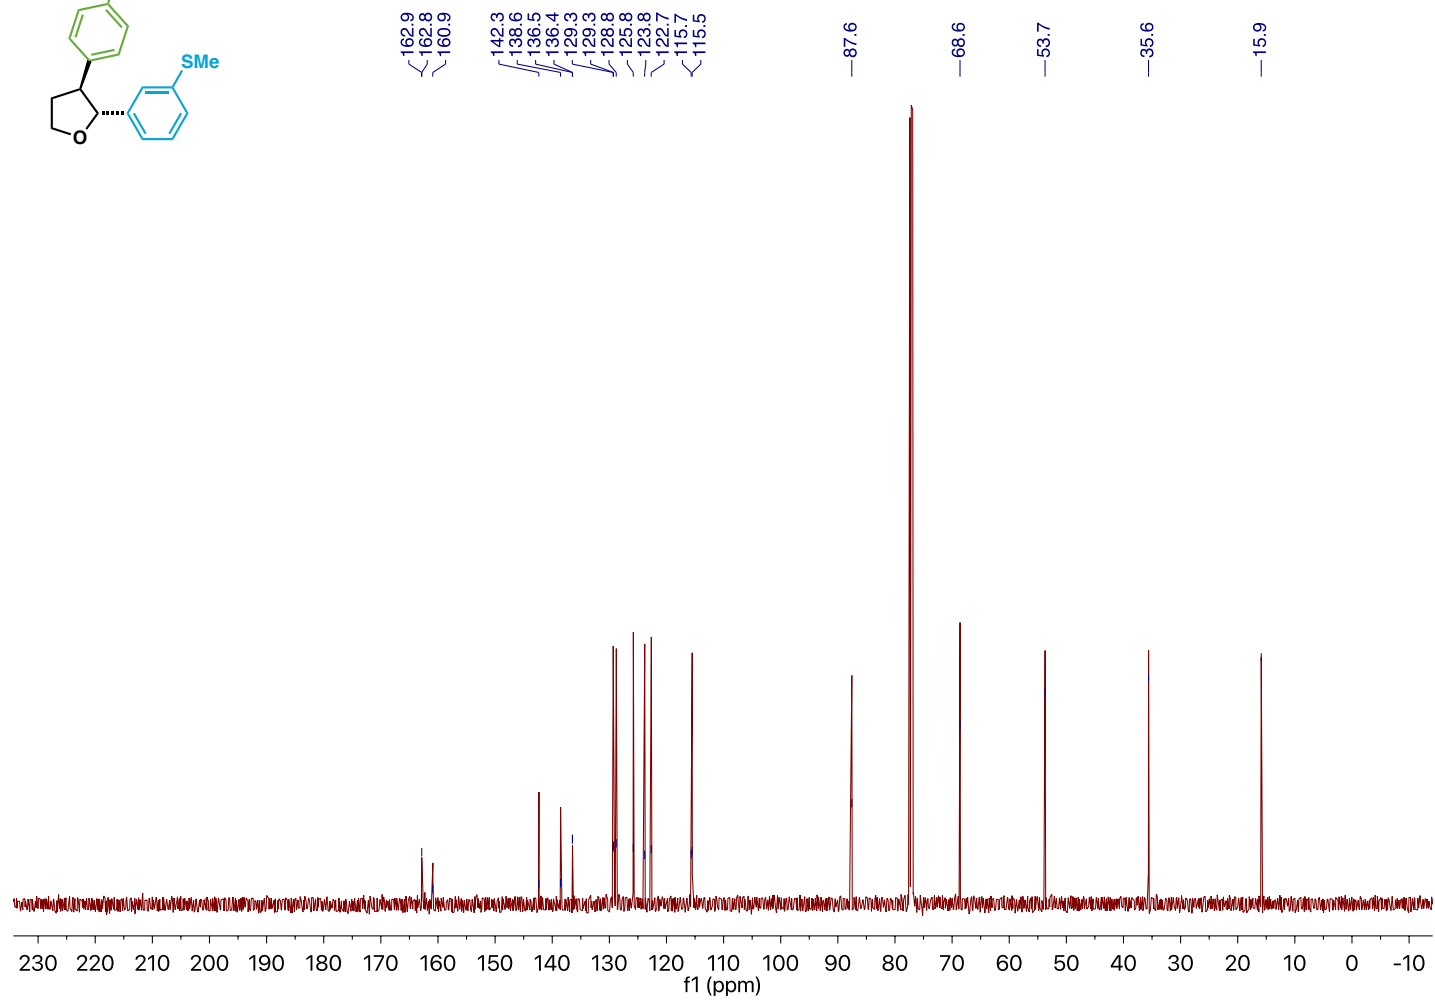

Compound 50 <sup>1</sup>H NMR

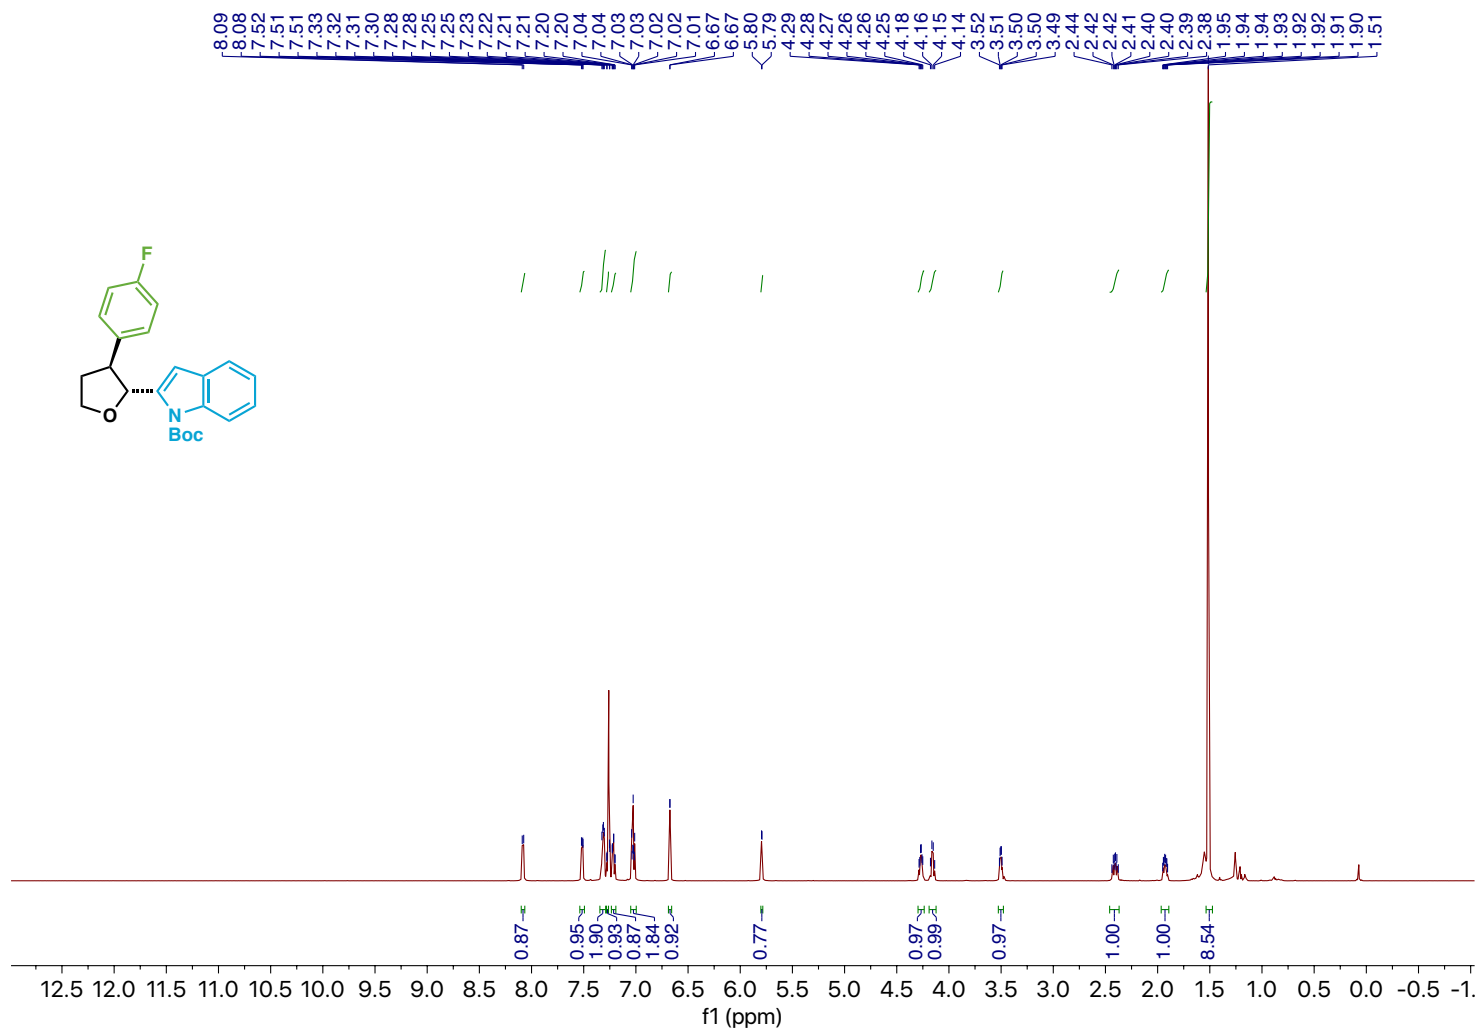

Compound 50 <sup>19</sup>F NMR

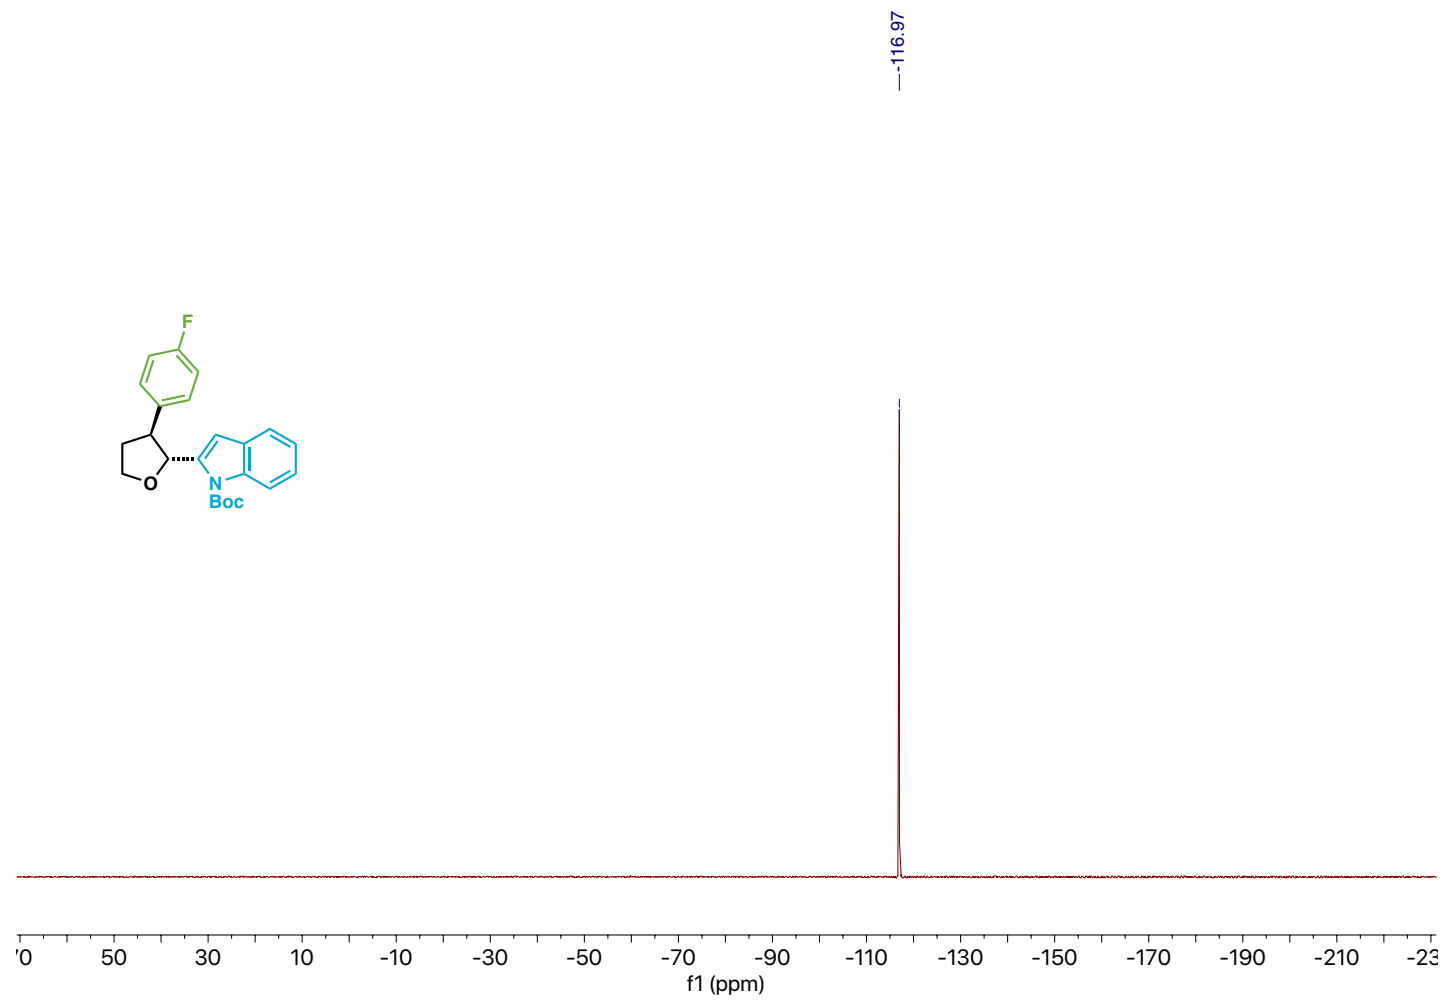

Compound 50 <sup>13</sup>C NMR

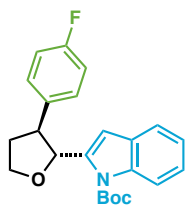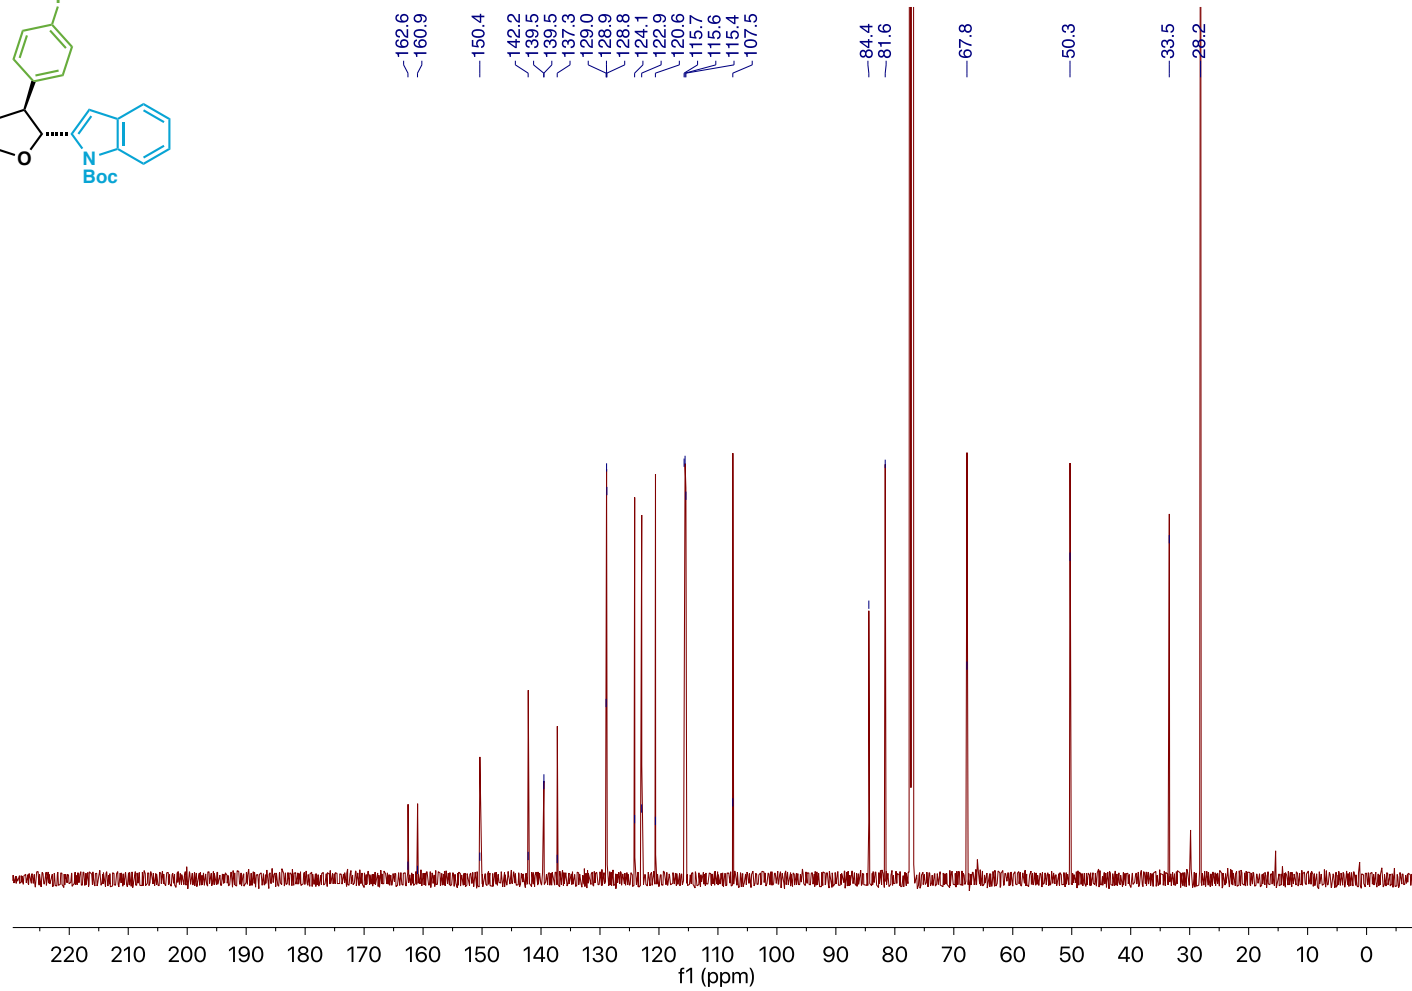

Compound 51 <sup>1</sup>H NMR

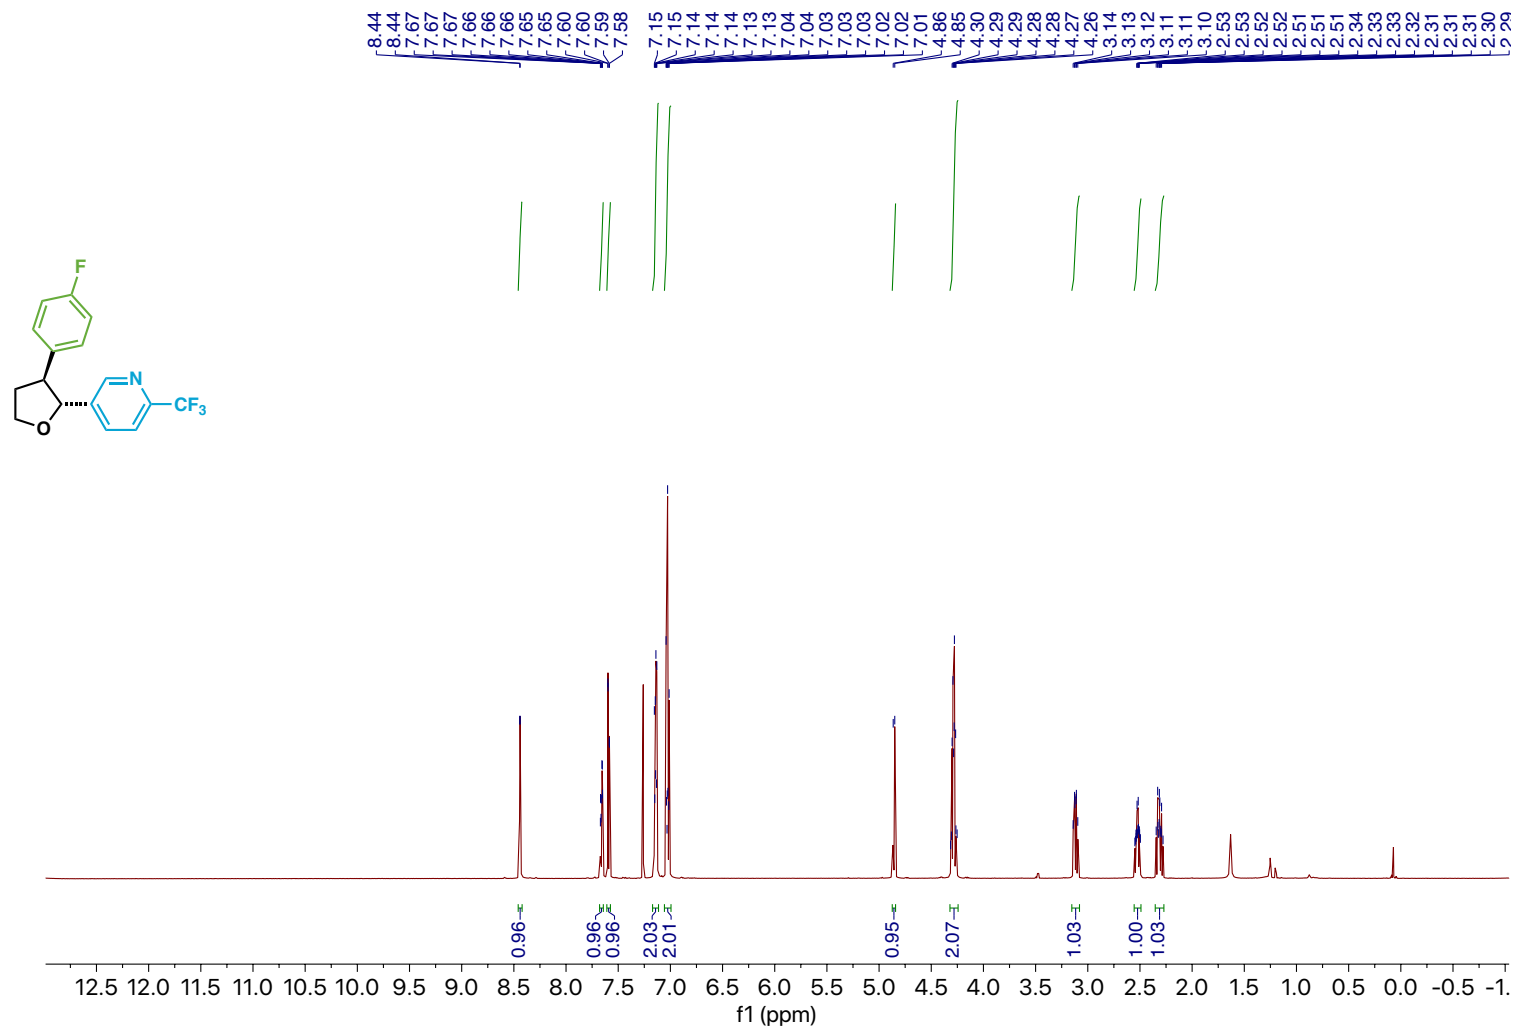

Compound 51 <sup>19</sup>F NMR

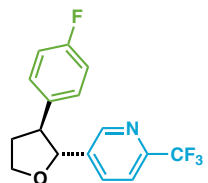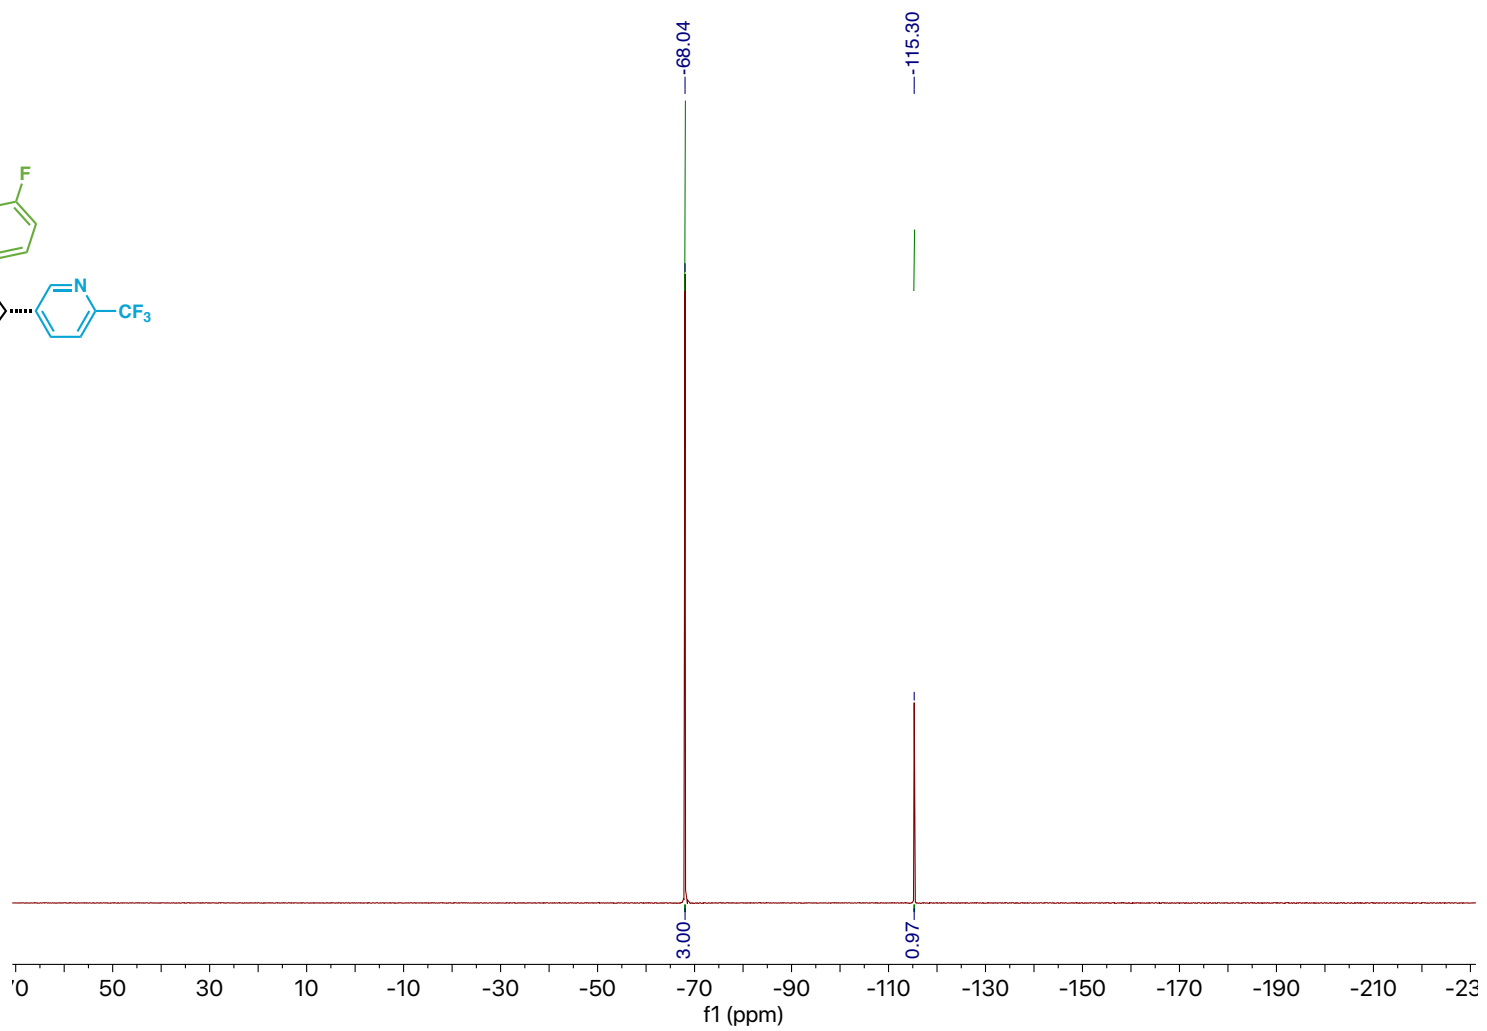



Compound 51 <sup>13</sup>C NMR

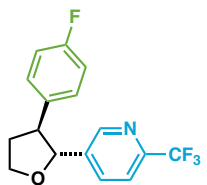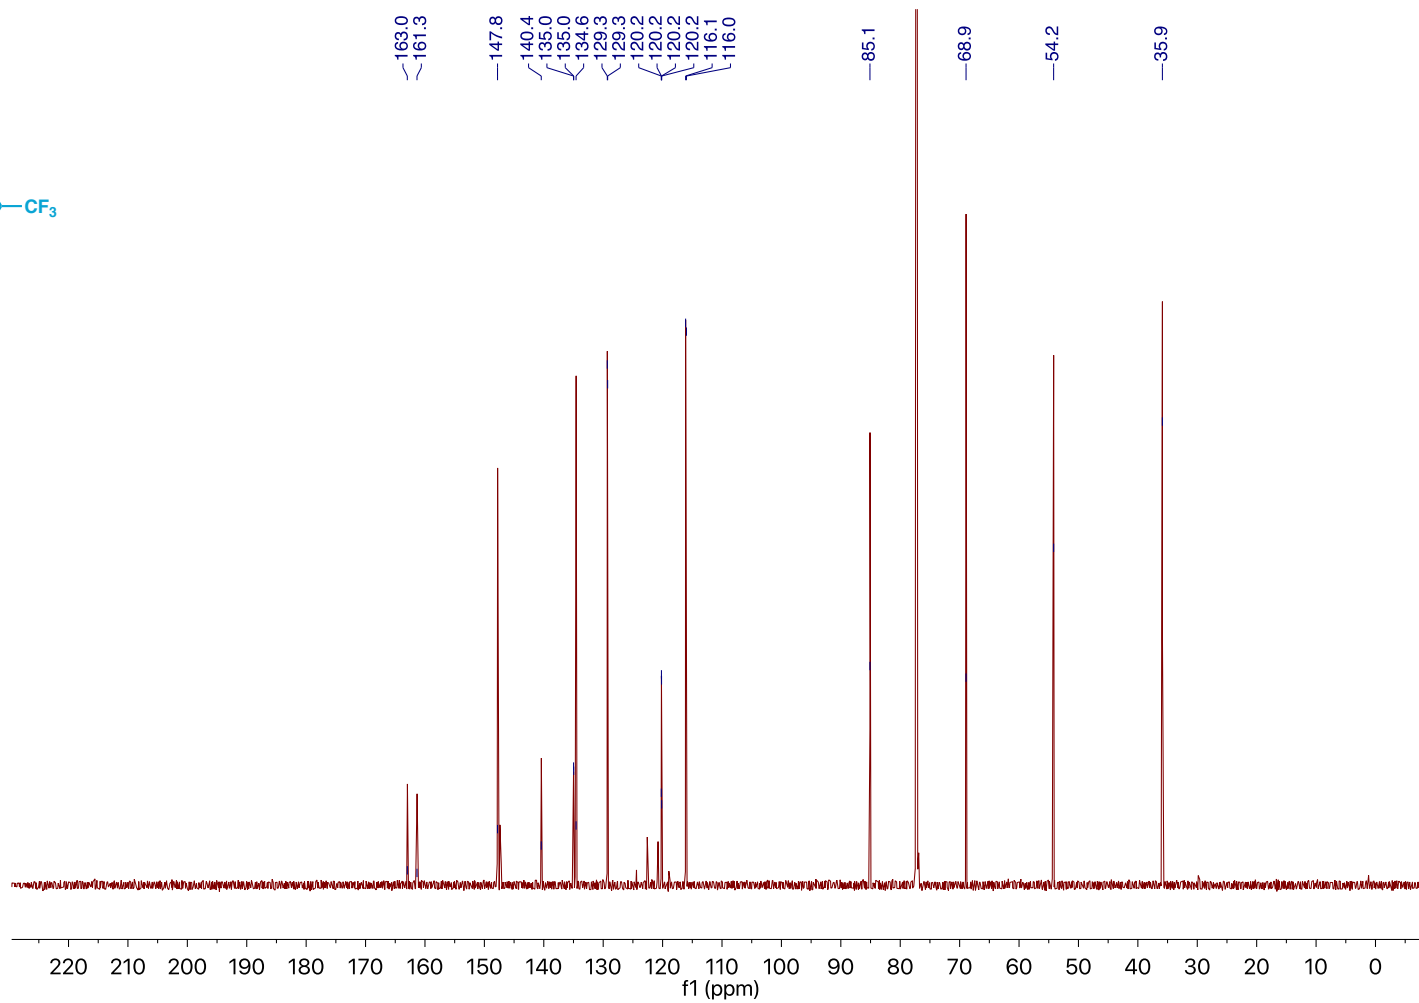

# Compound 52 <sup>1</sup>H NMR

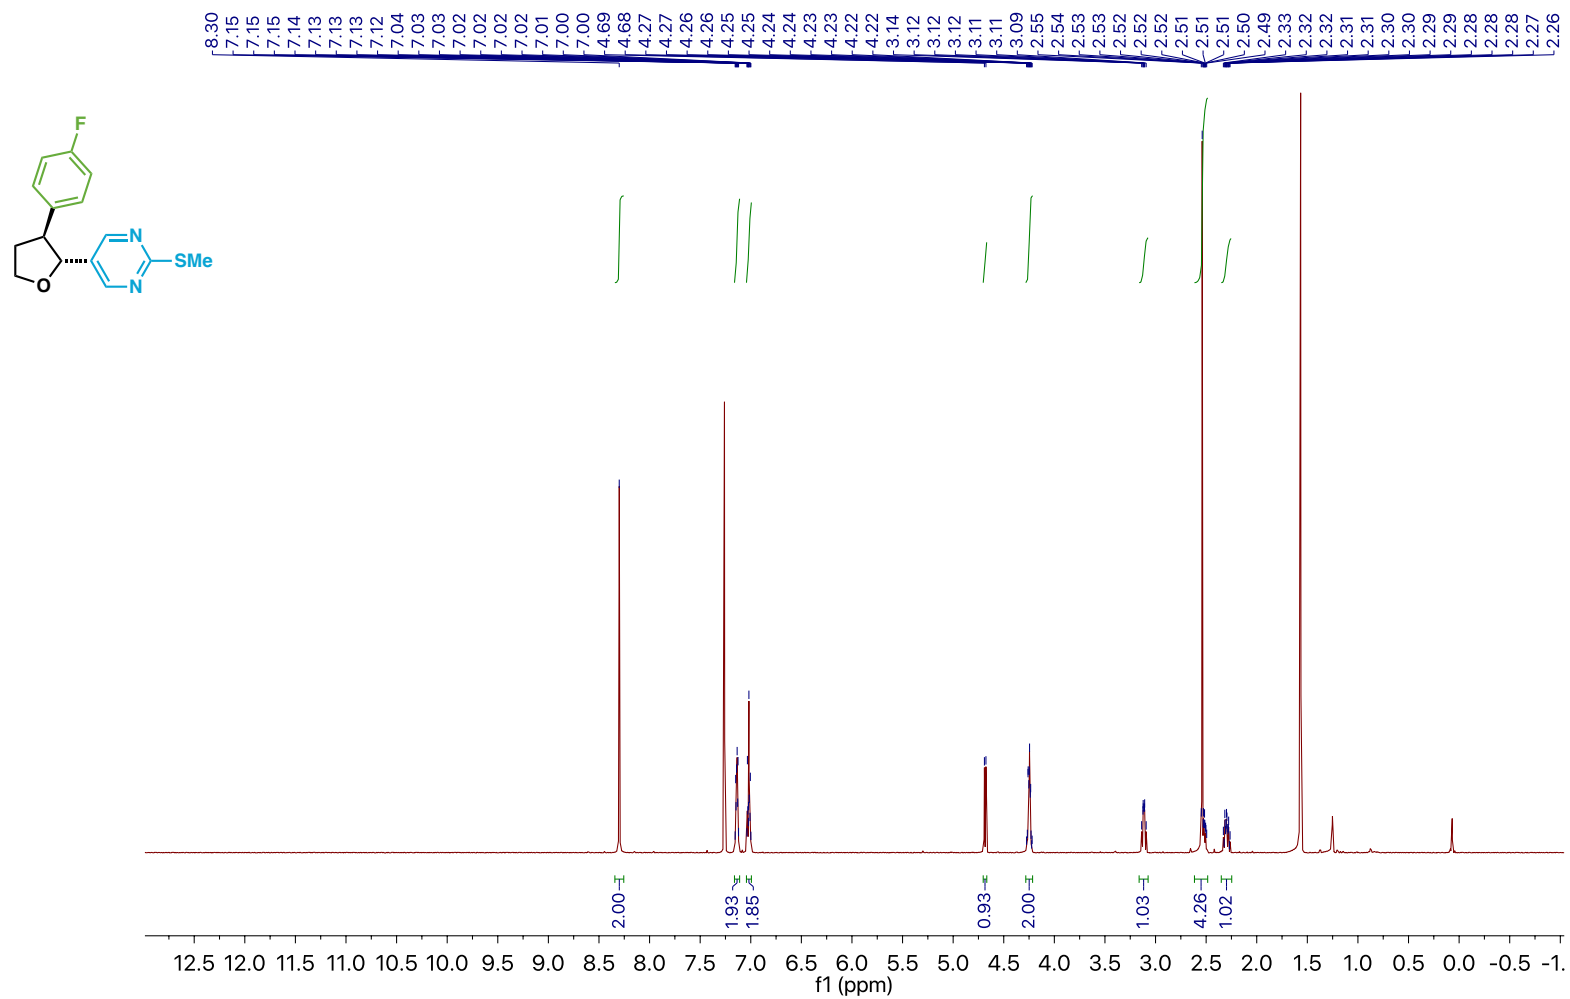

Compound 52 <sup>19</sup>F NMR

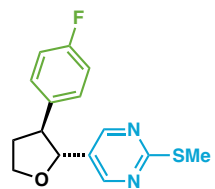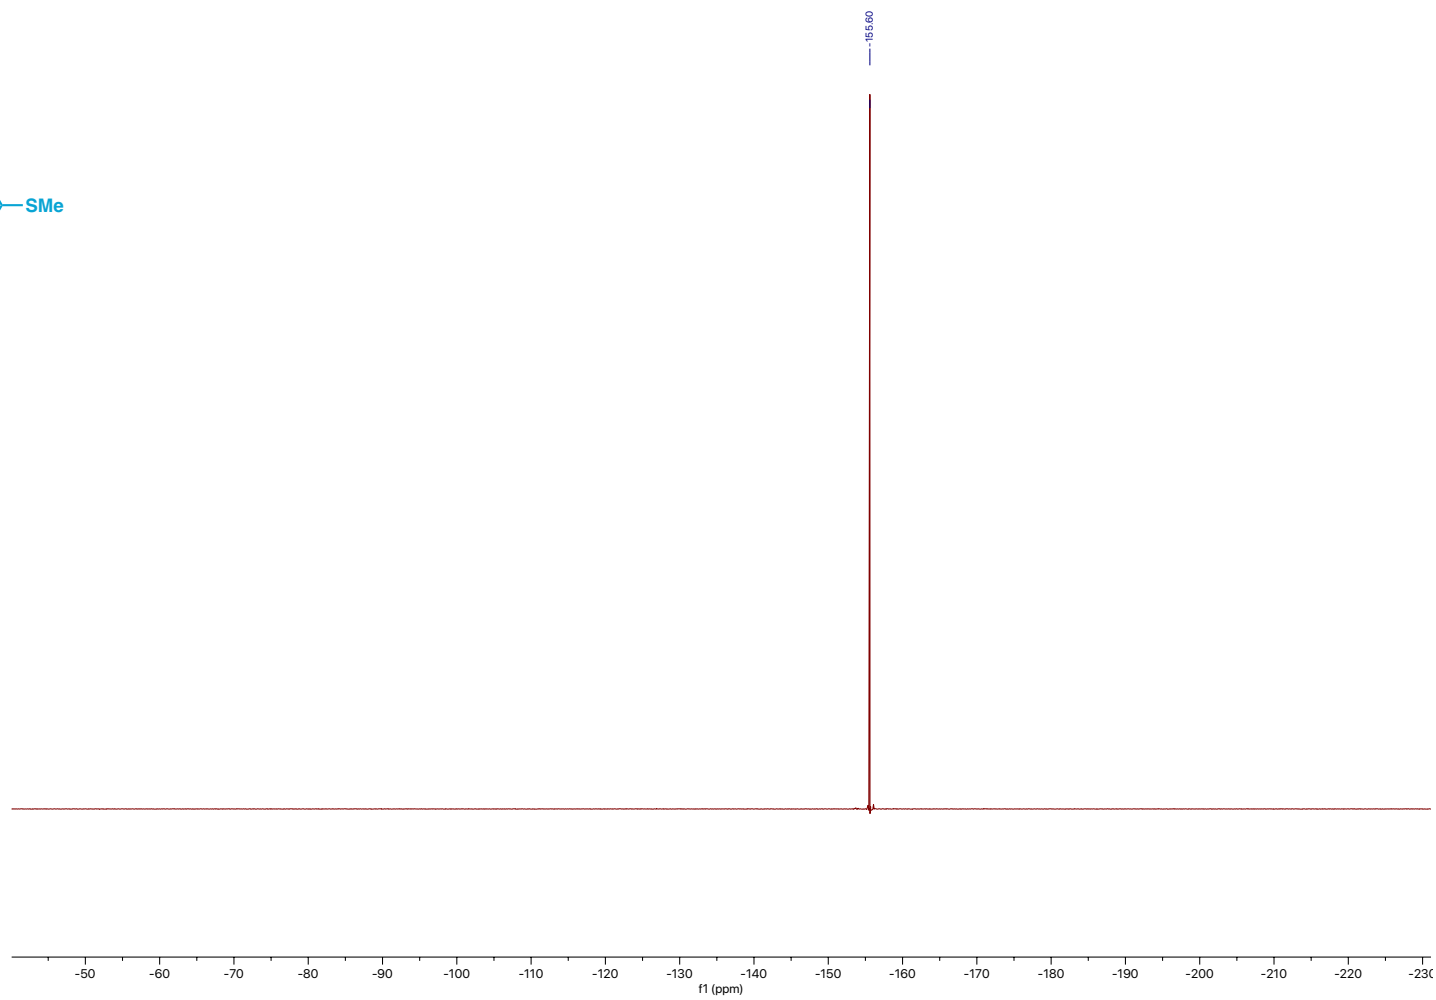

Compound 52 <sup>13</sup>C NMR

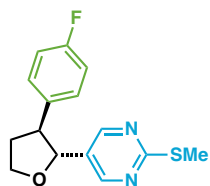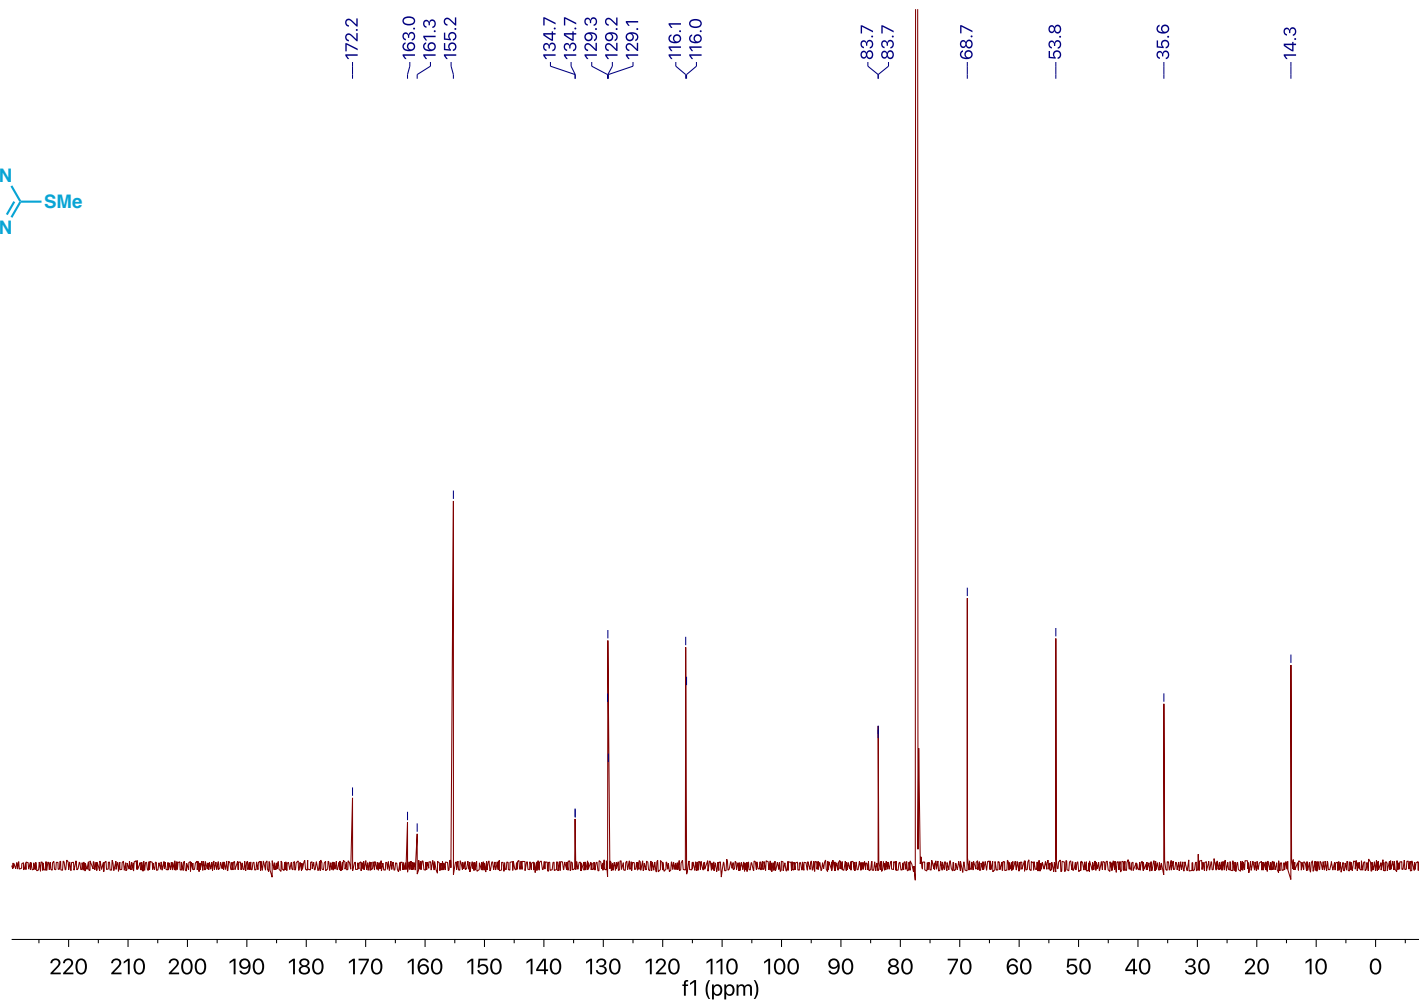

# Compound B13 <sup>1</sup>H NMR

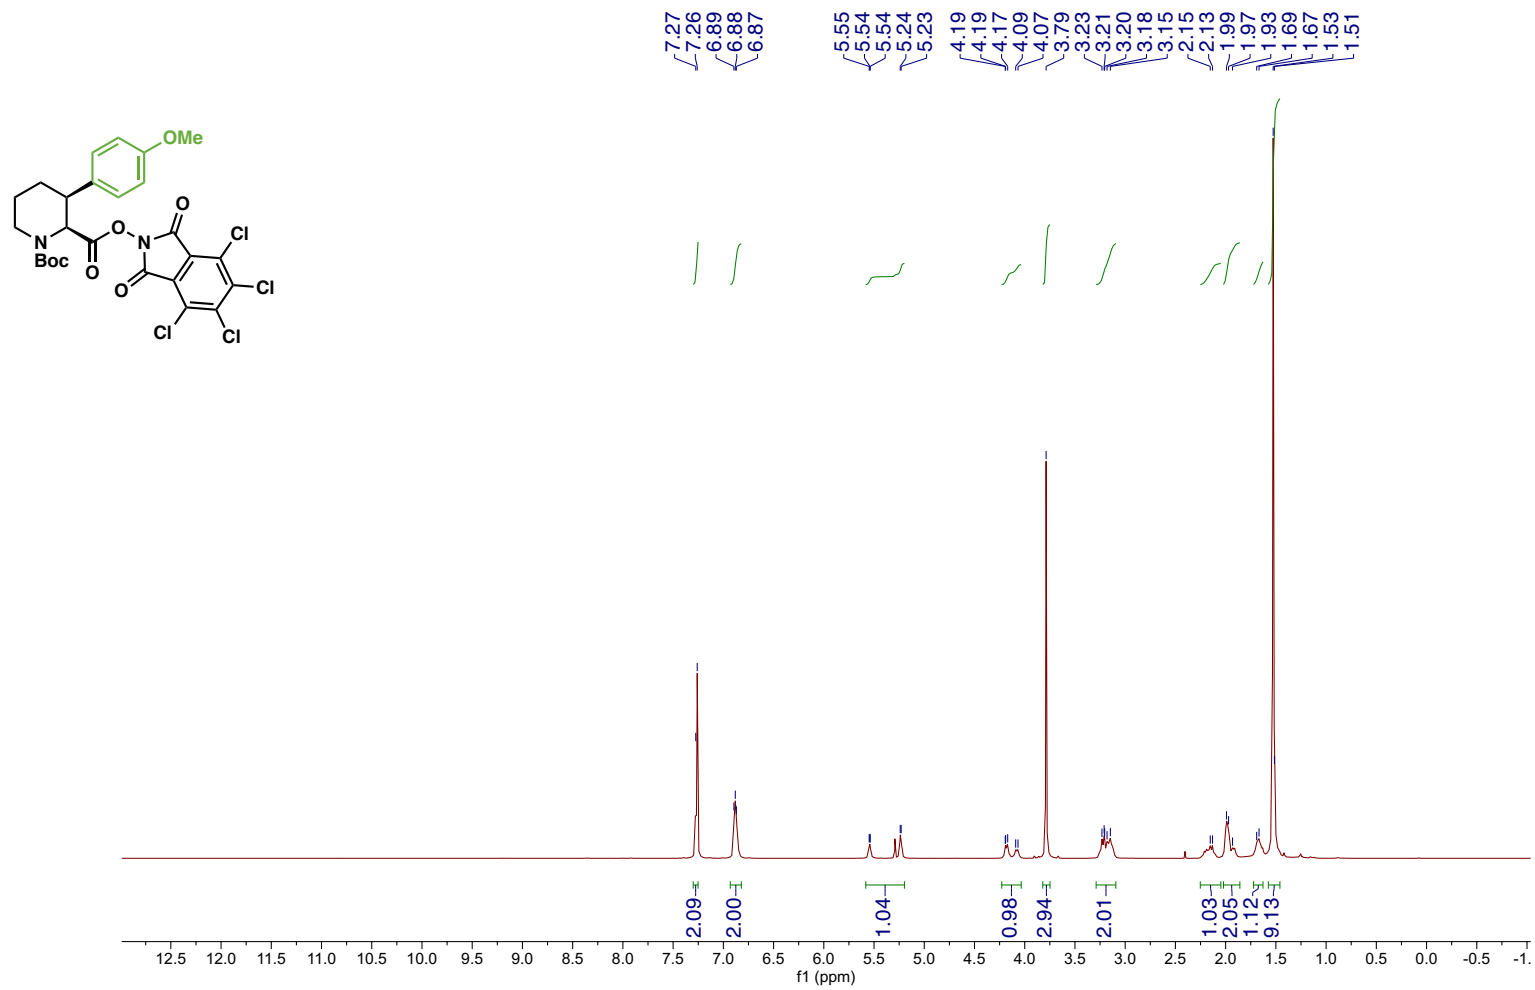

Compound B13 <sup>13</sup>C NMR

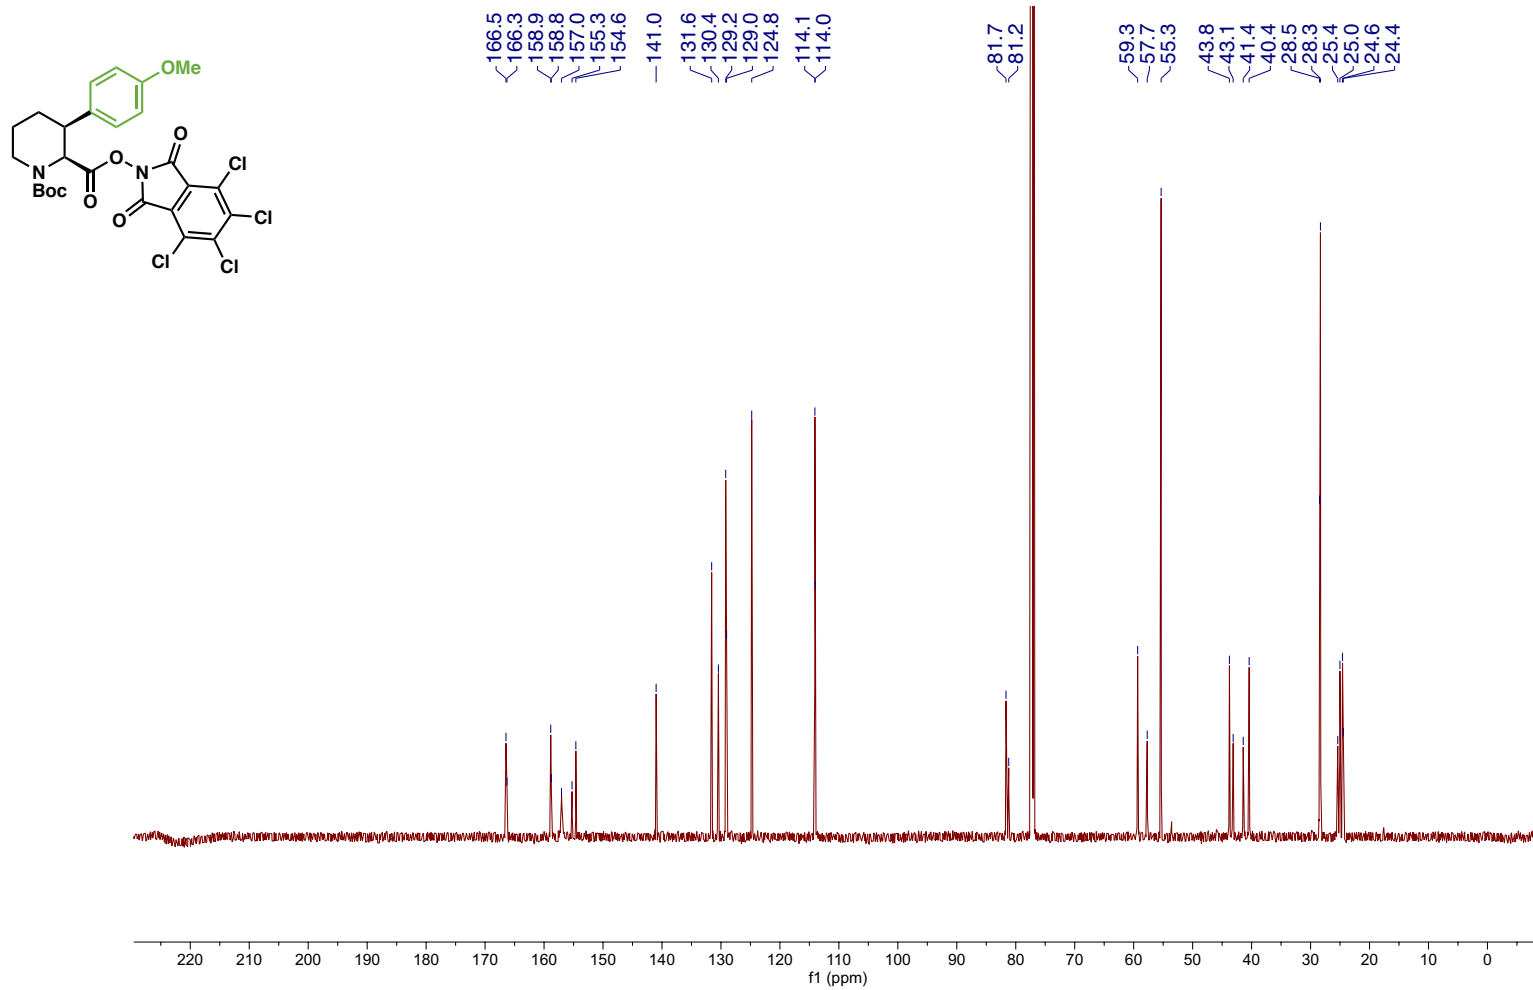

Compound 53 <sup>1</sup>H NMR

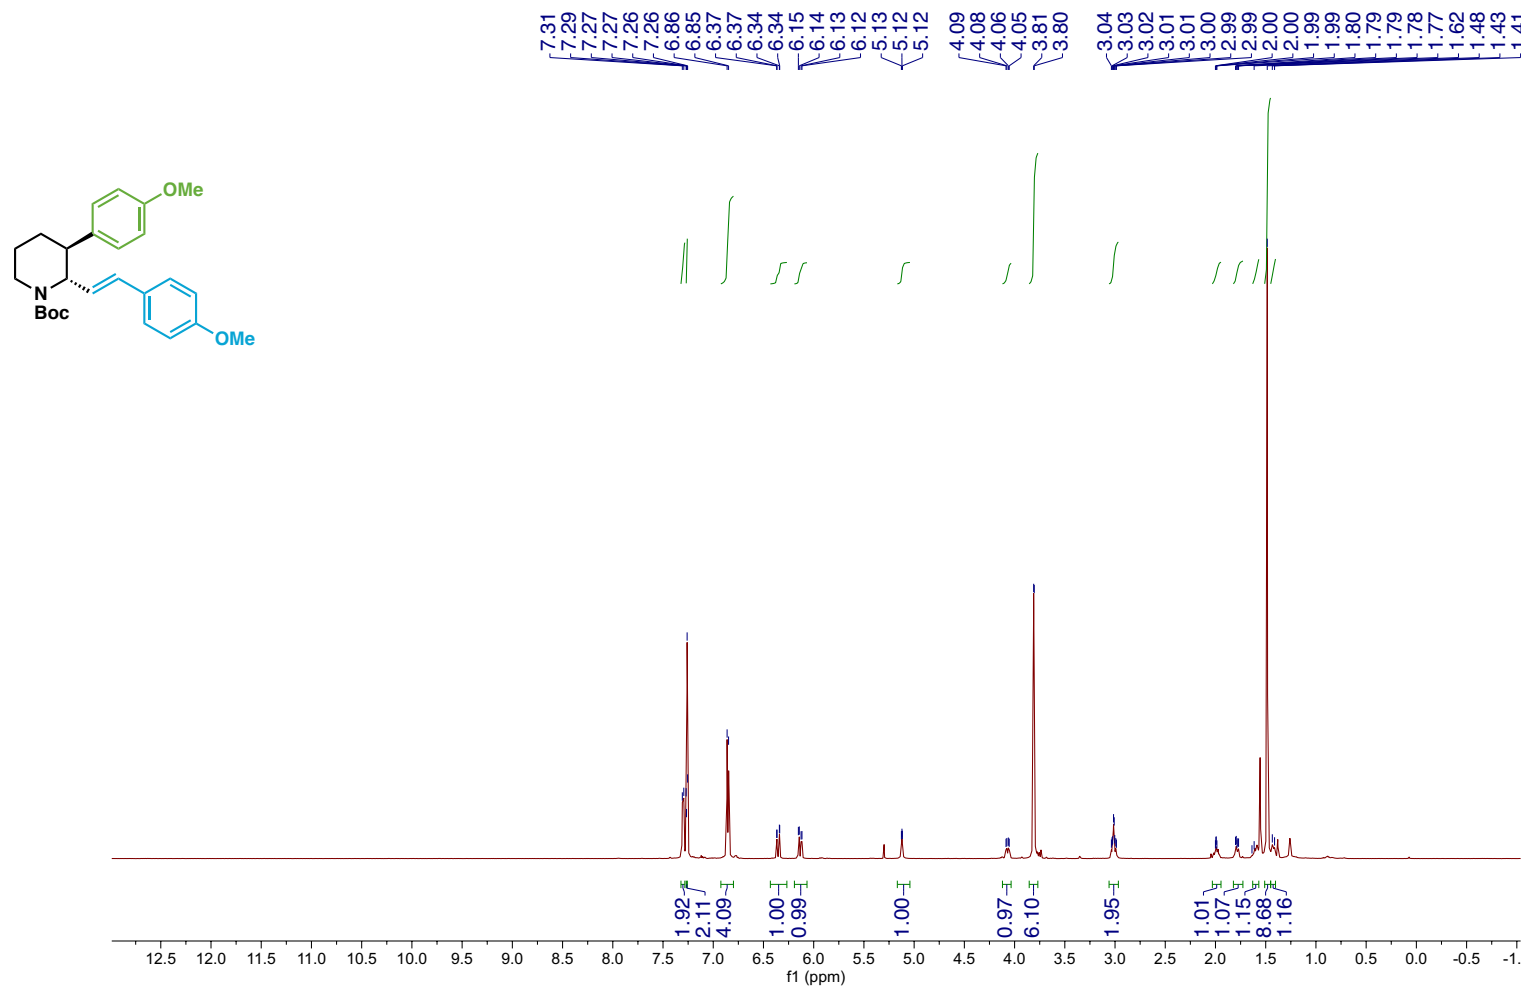

Compound 53 <sup>13</sup>C NMR

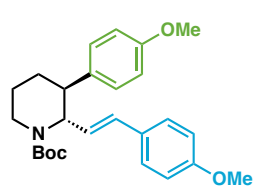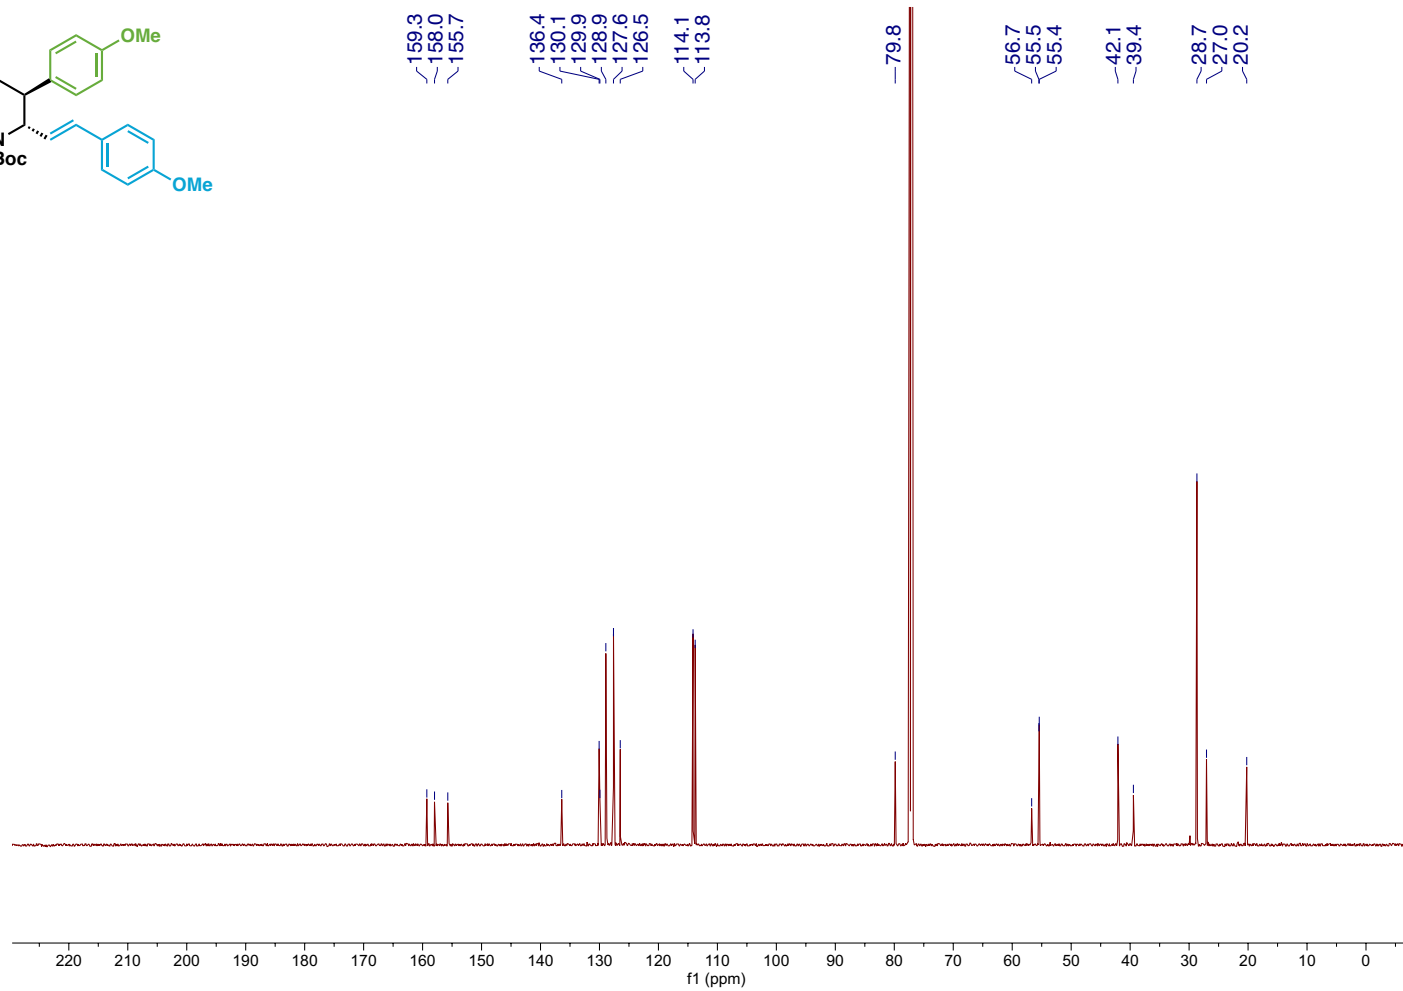



Compound 54 <sup>1</sup>H NMR

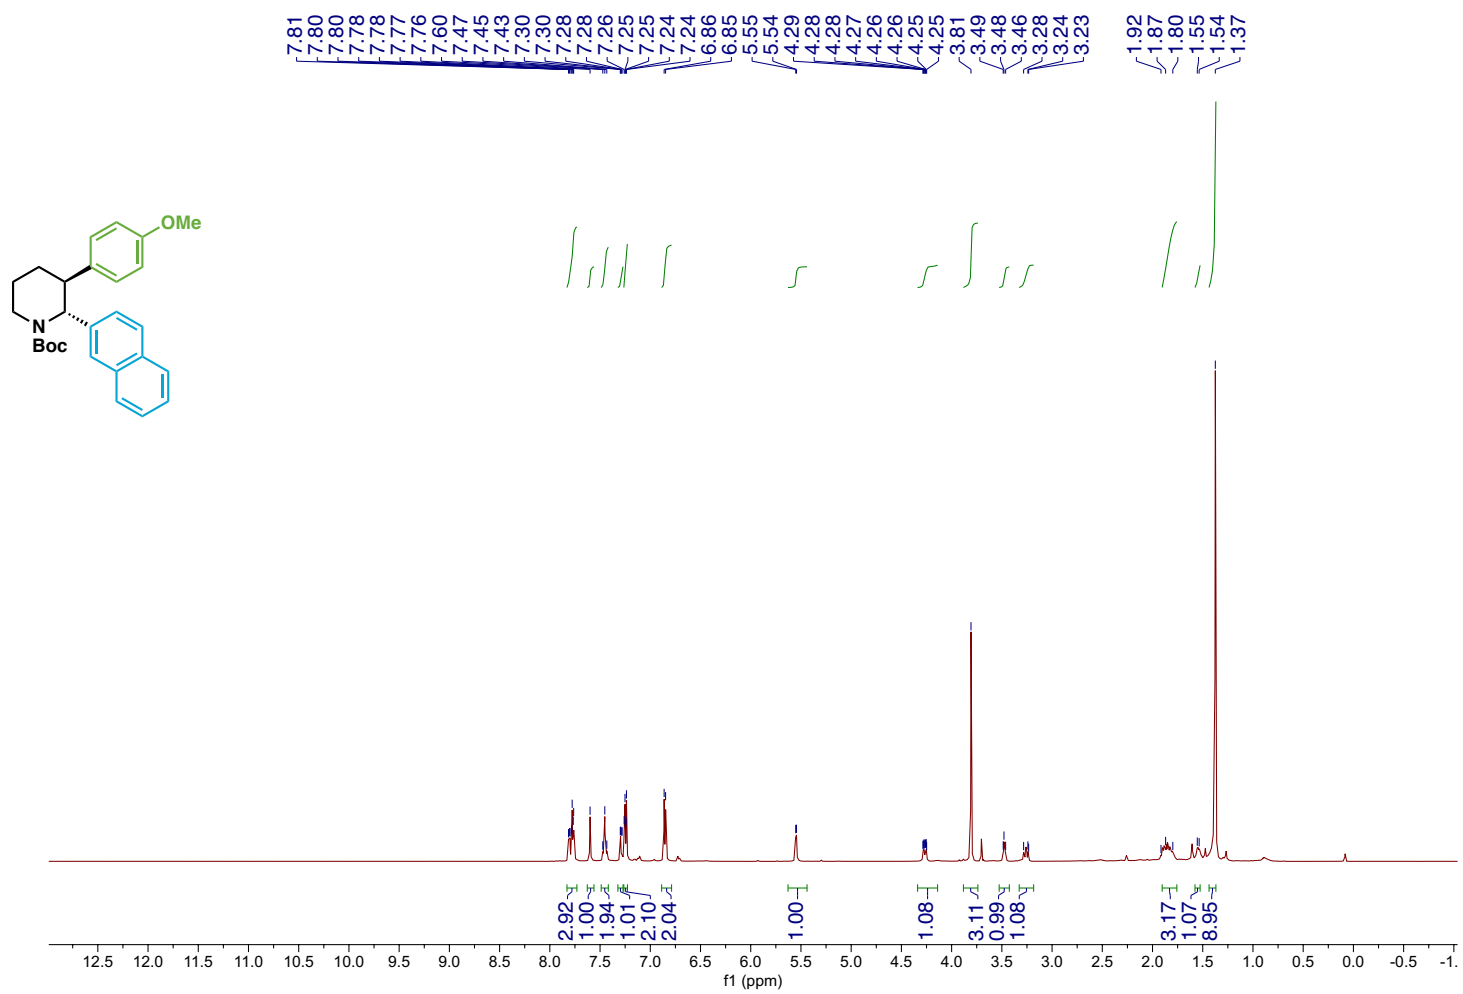

Compound 54 <sup>13</sup>C NMR

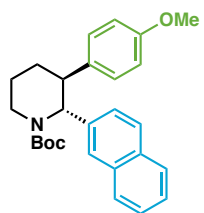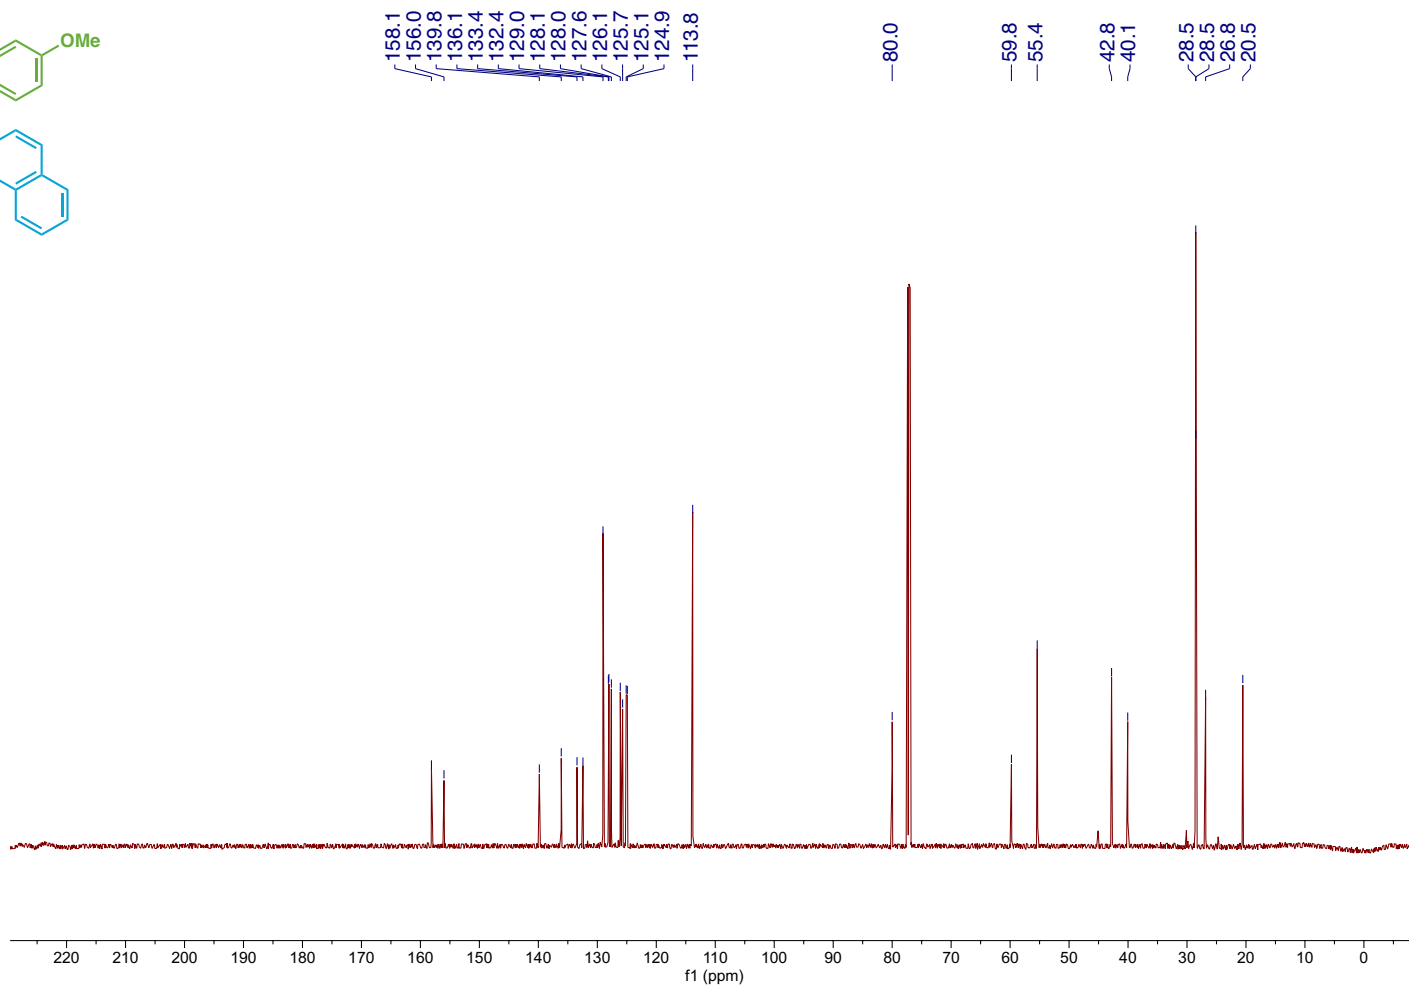

Compound 55 <sup>1</sup>H NMR

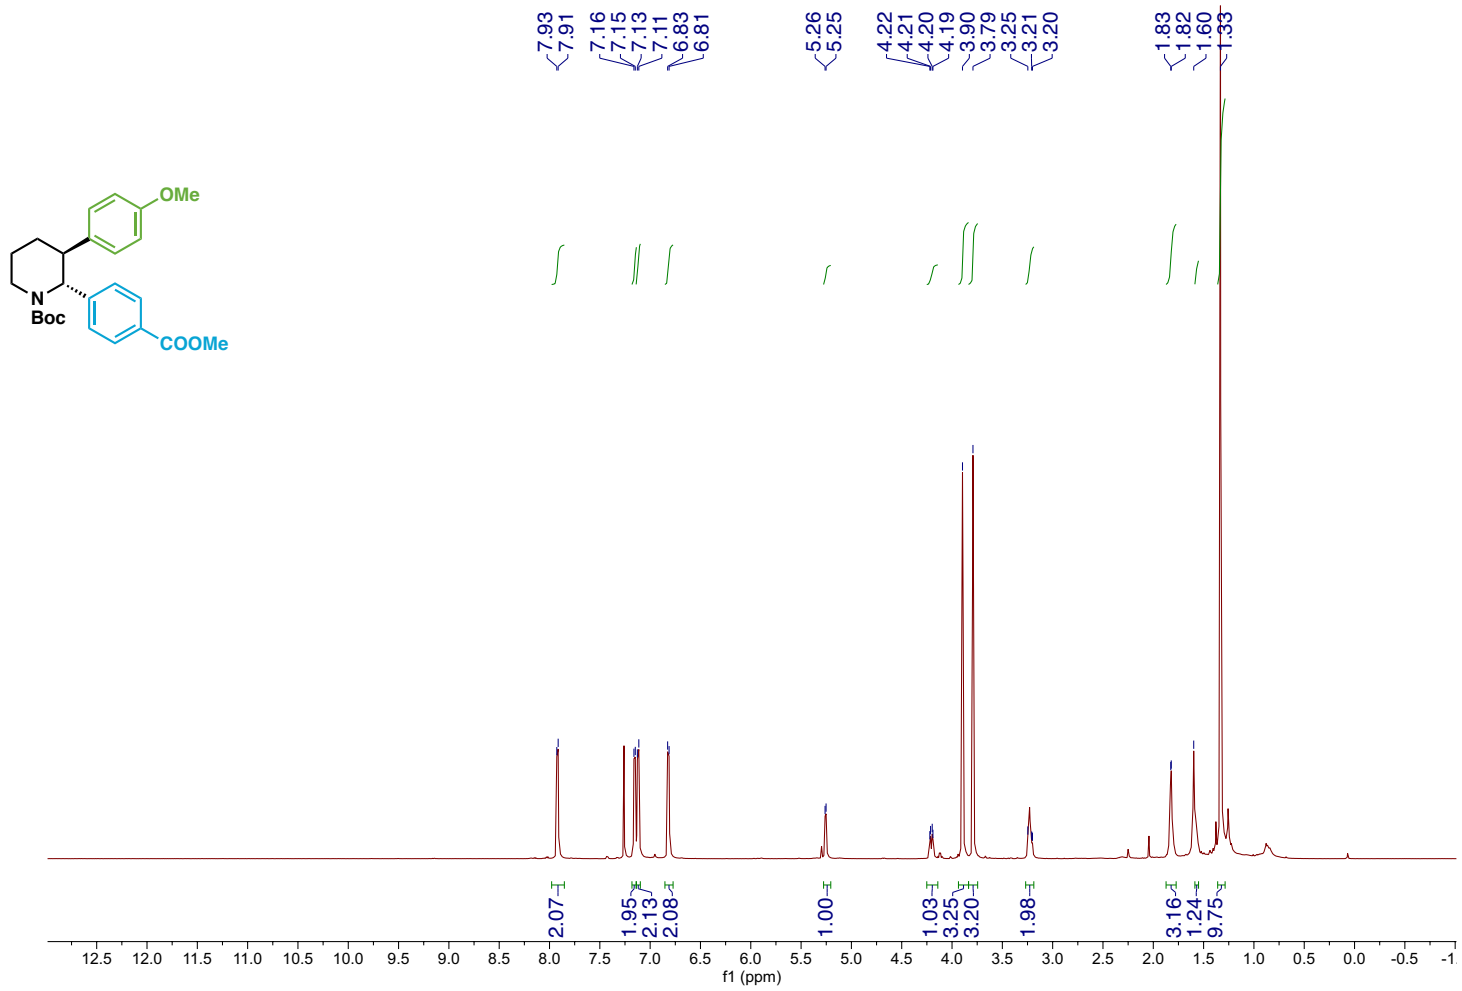

# Compound 55 <sup>13</sup>C NMR

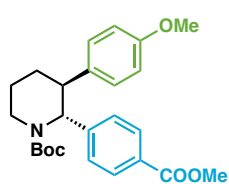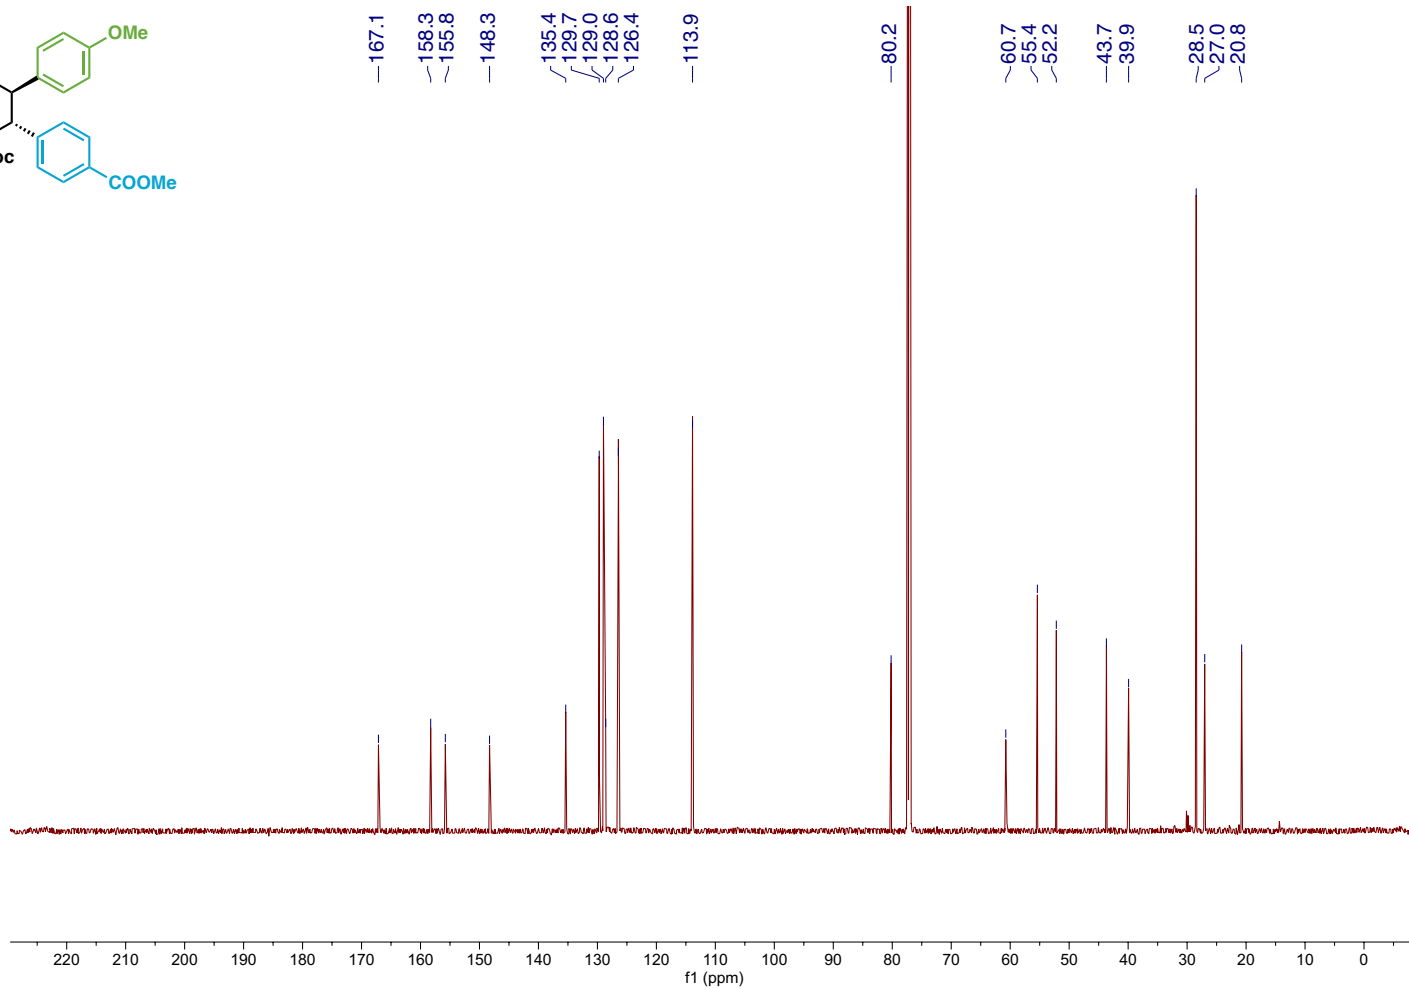

Compound 56 <sup>1</sup>H NMR

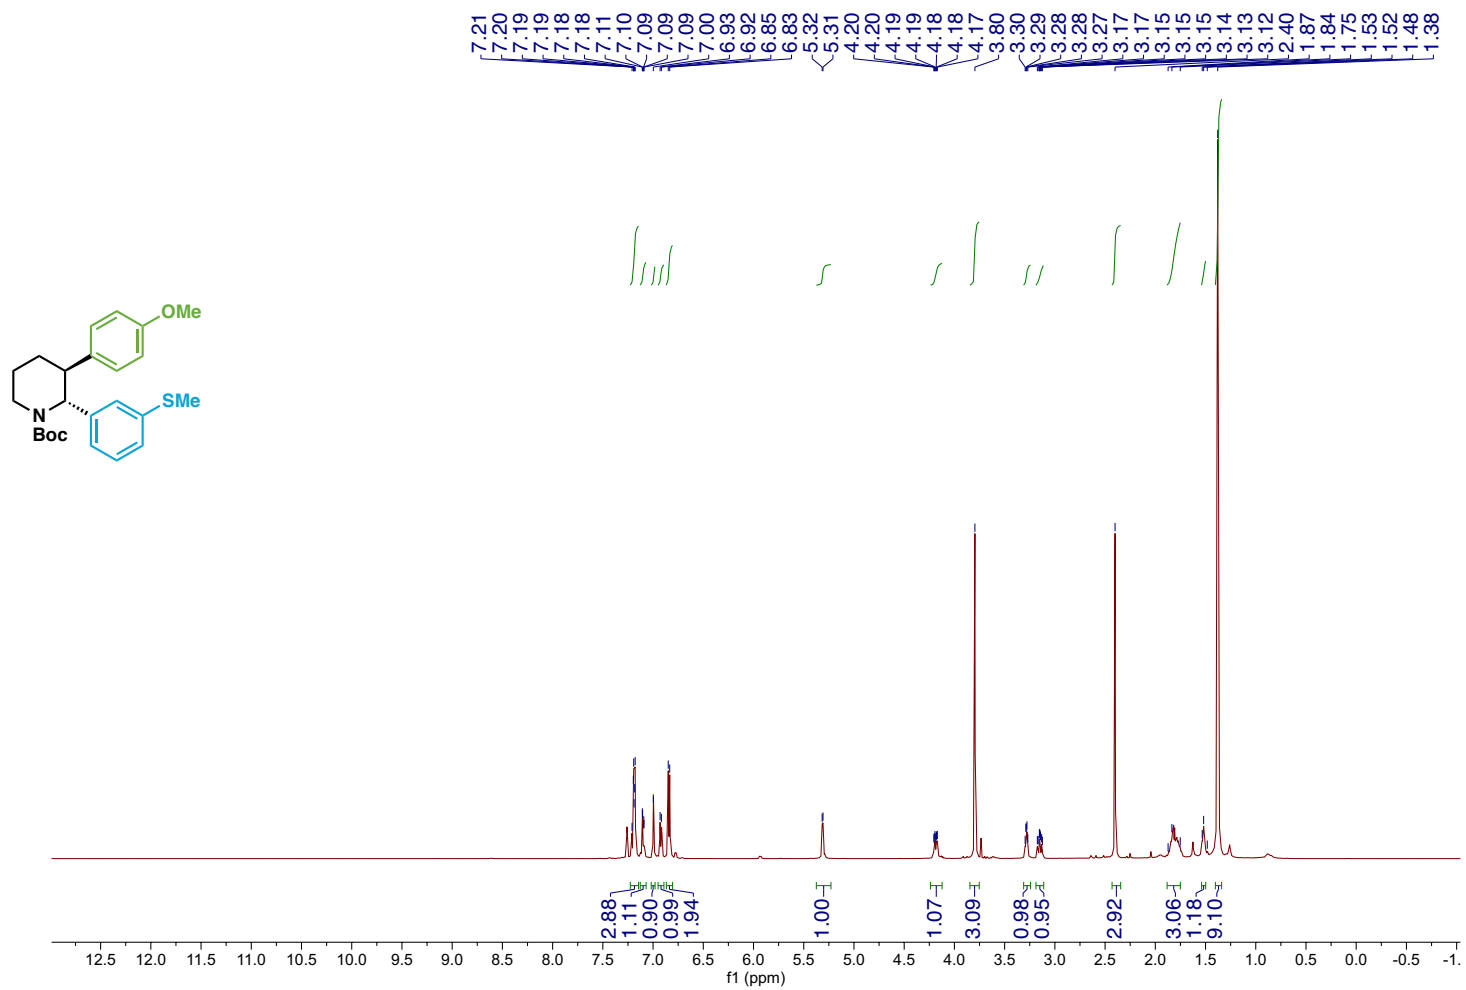

# Compound 56 <sup>13</sup>C NMR

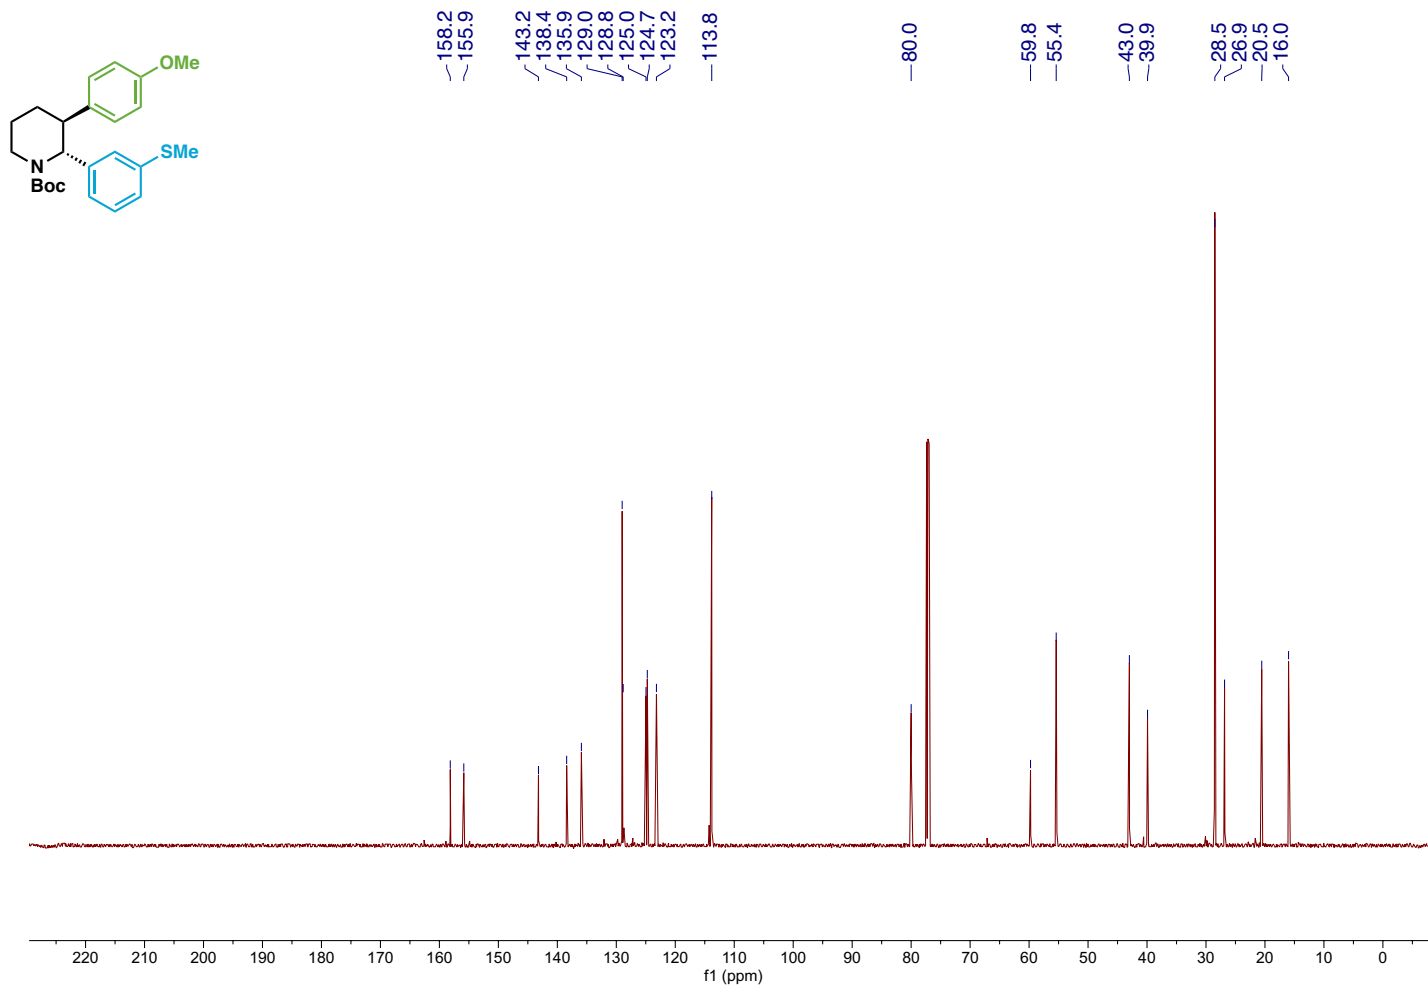

Compound 57 <sup>1</sup>H NMR

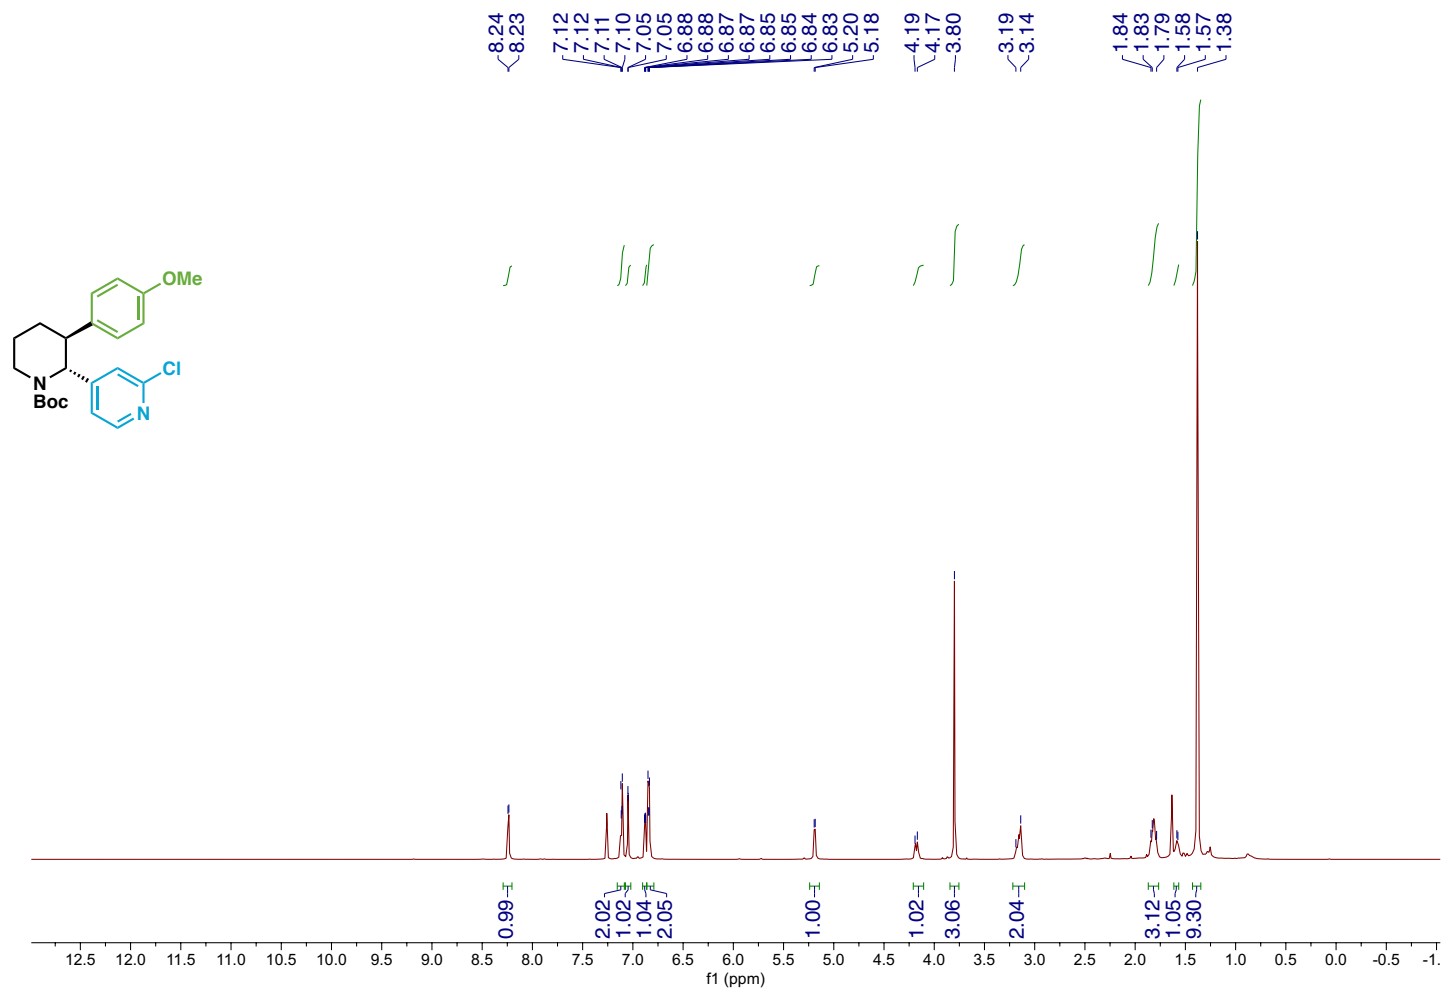

Compound 57 <sup>13</sup>C NMR

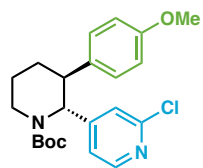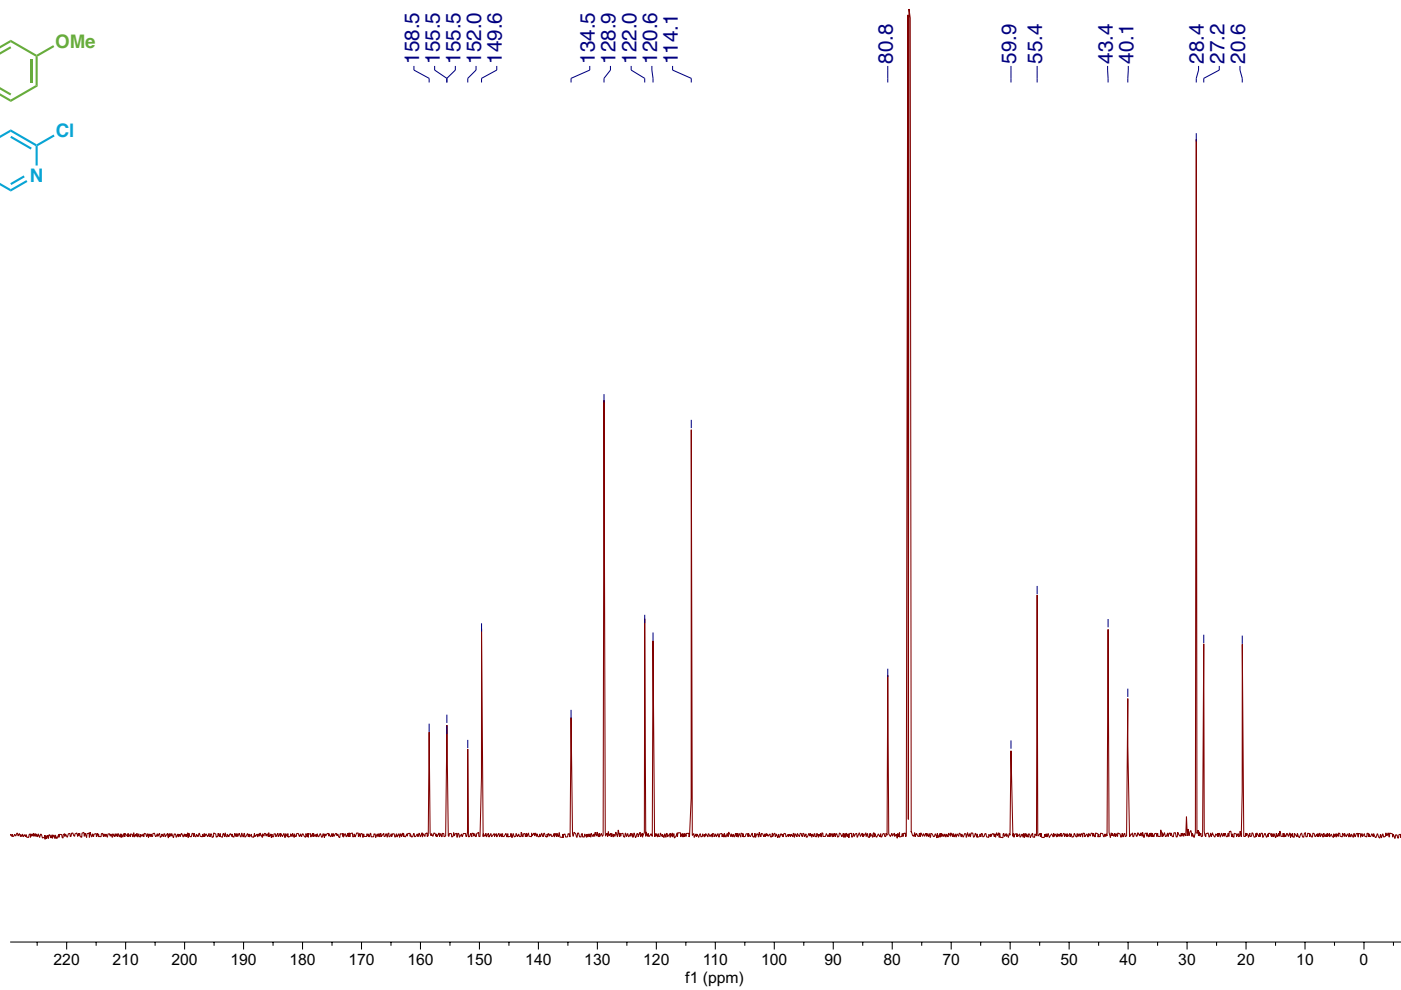



Compound 58 <sup>1</sup>H NMR

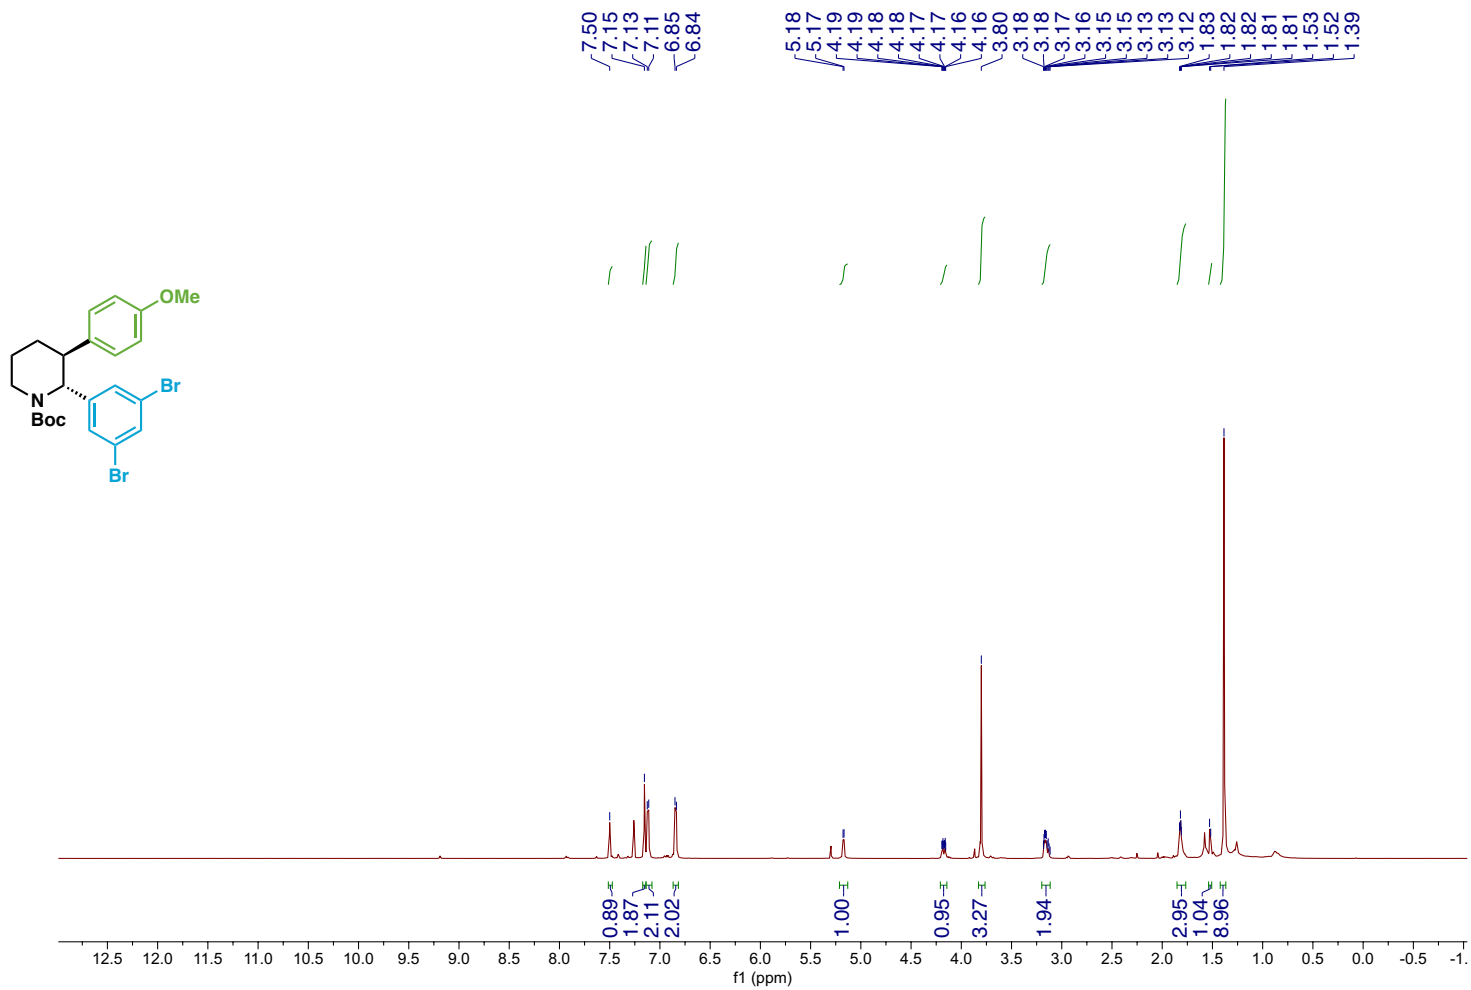

Compound 58 <sup>13</sup>C NMR

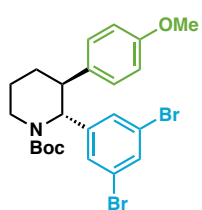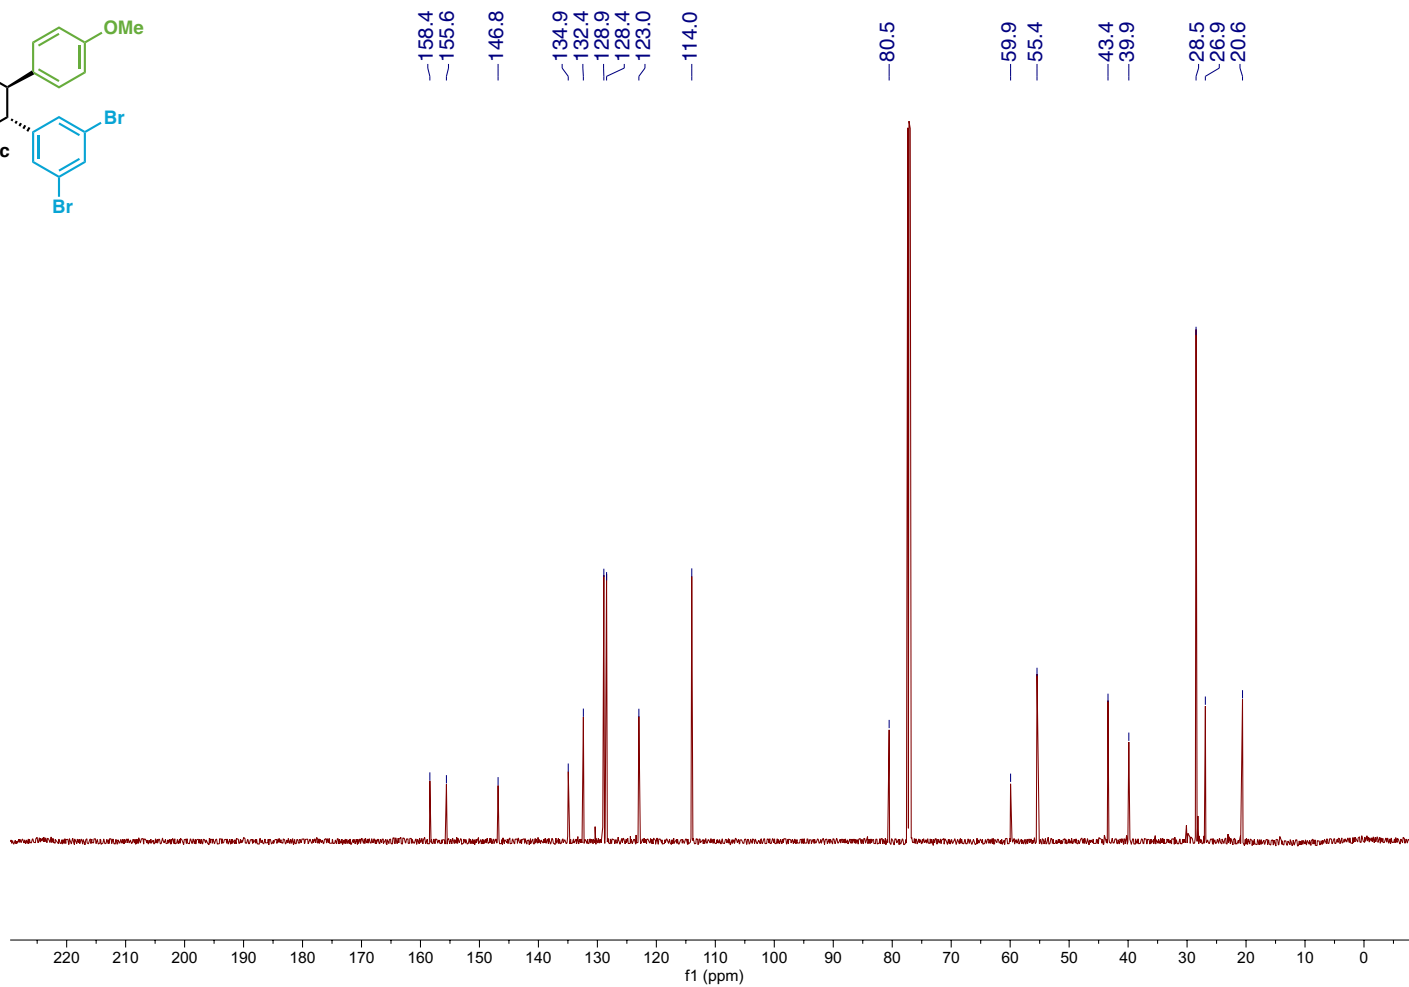

Compound 59 <sup>1</sup>H NMR

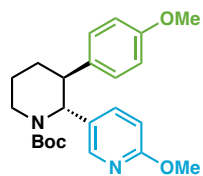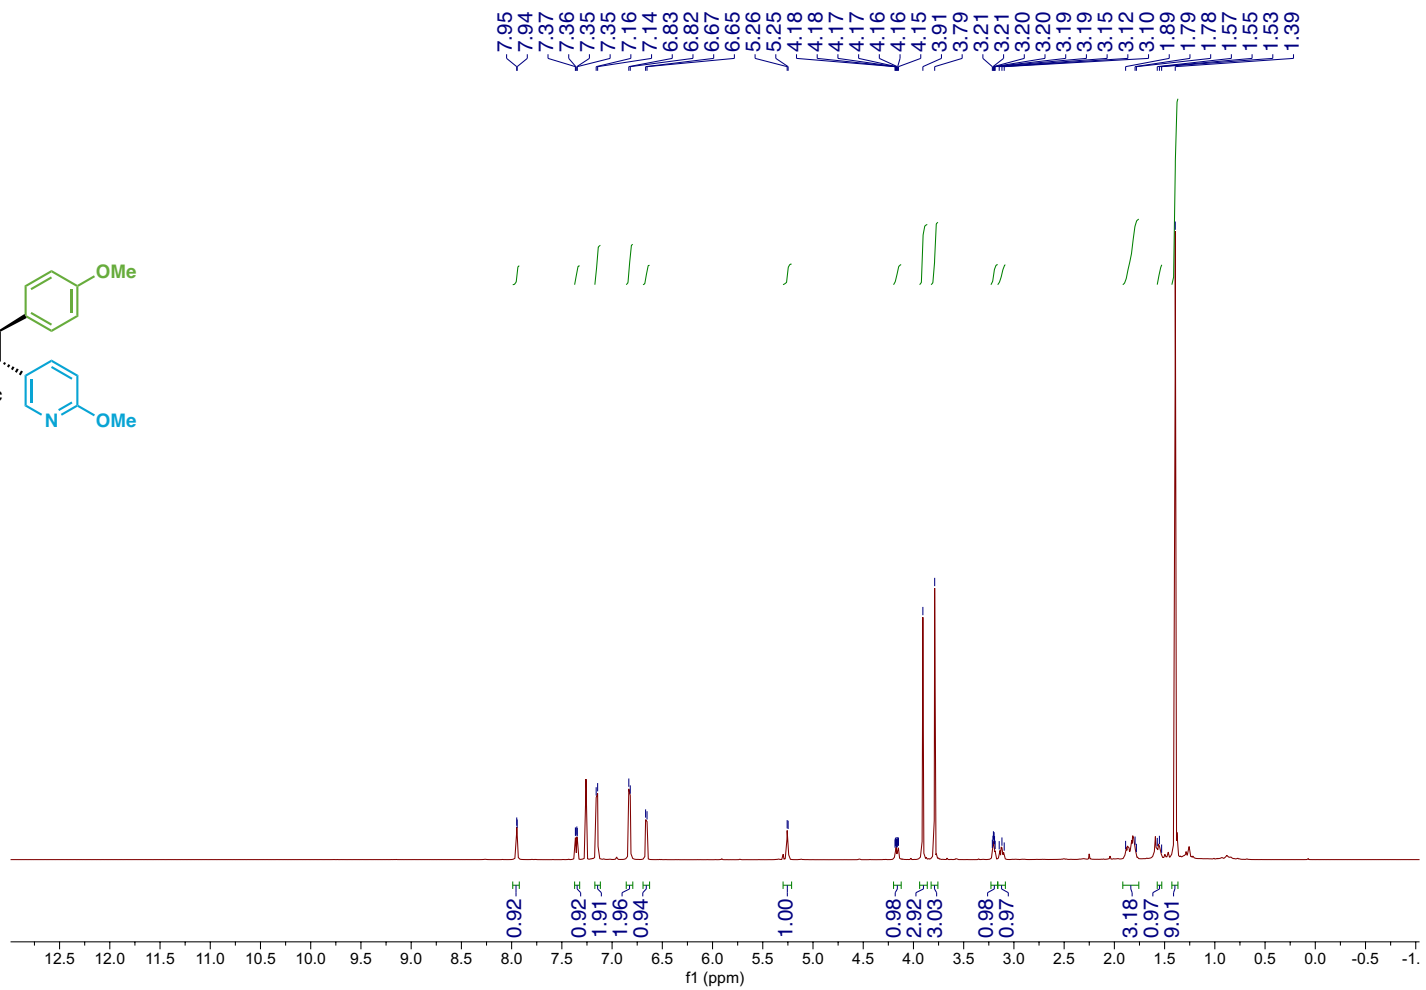

Compound 59 <sup>13</sup>C NMR

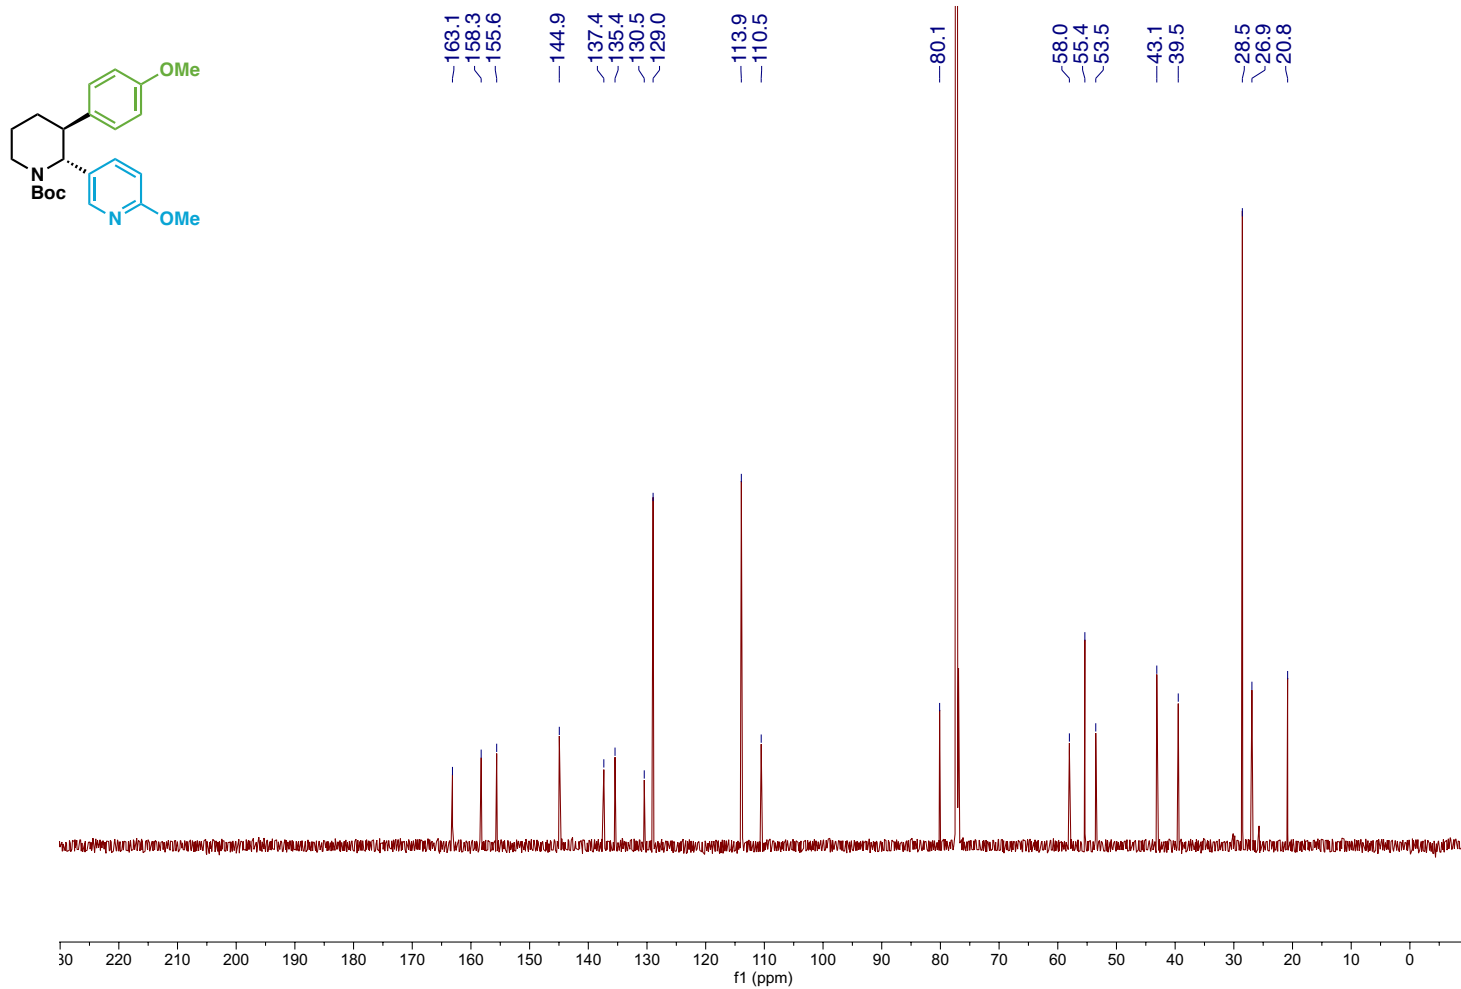

# Compound B14 <sup>1</sup>H NMR

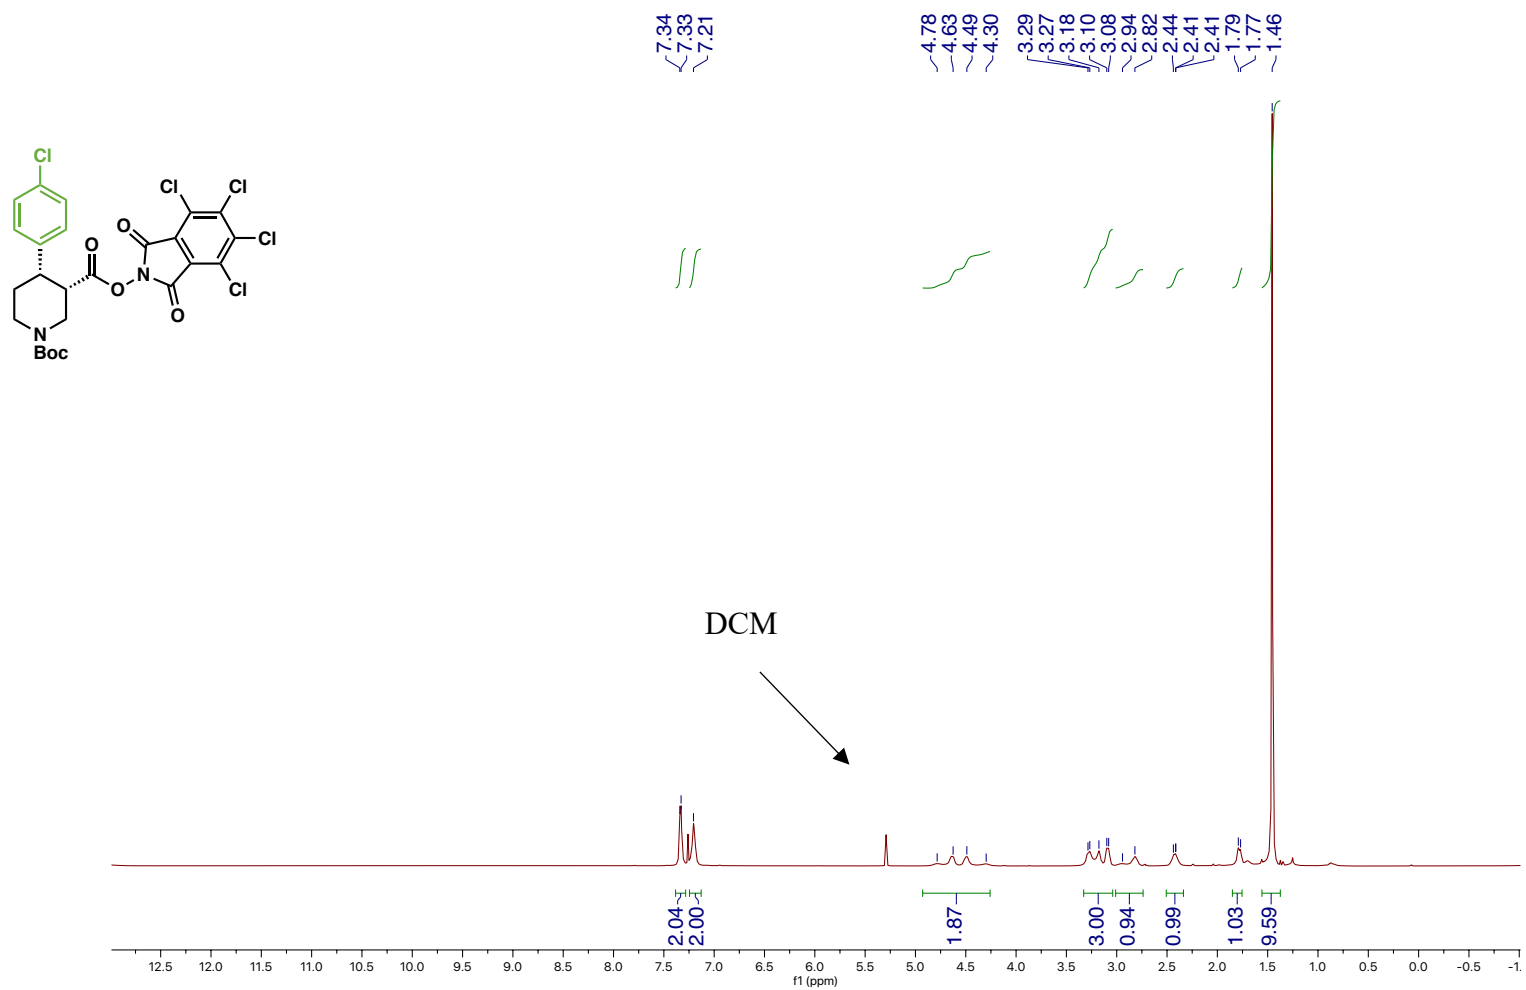

S389



Compound 60  $^1\text{H}$  NMR

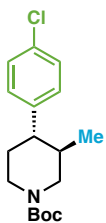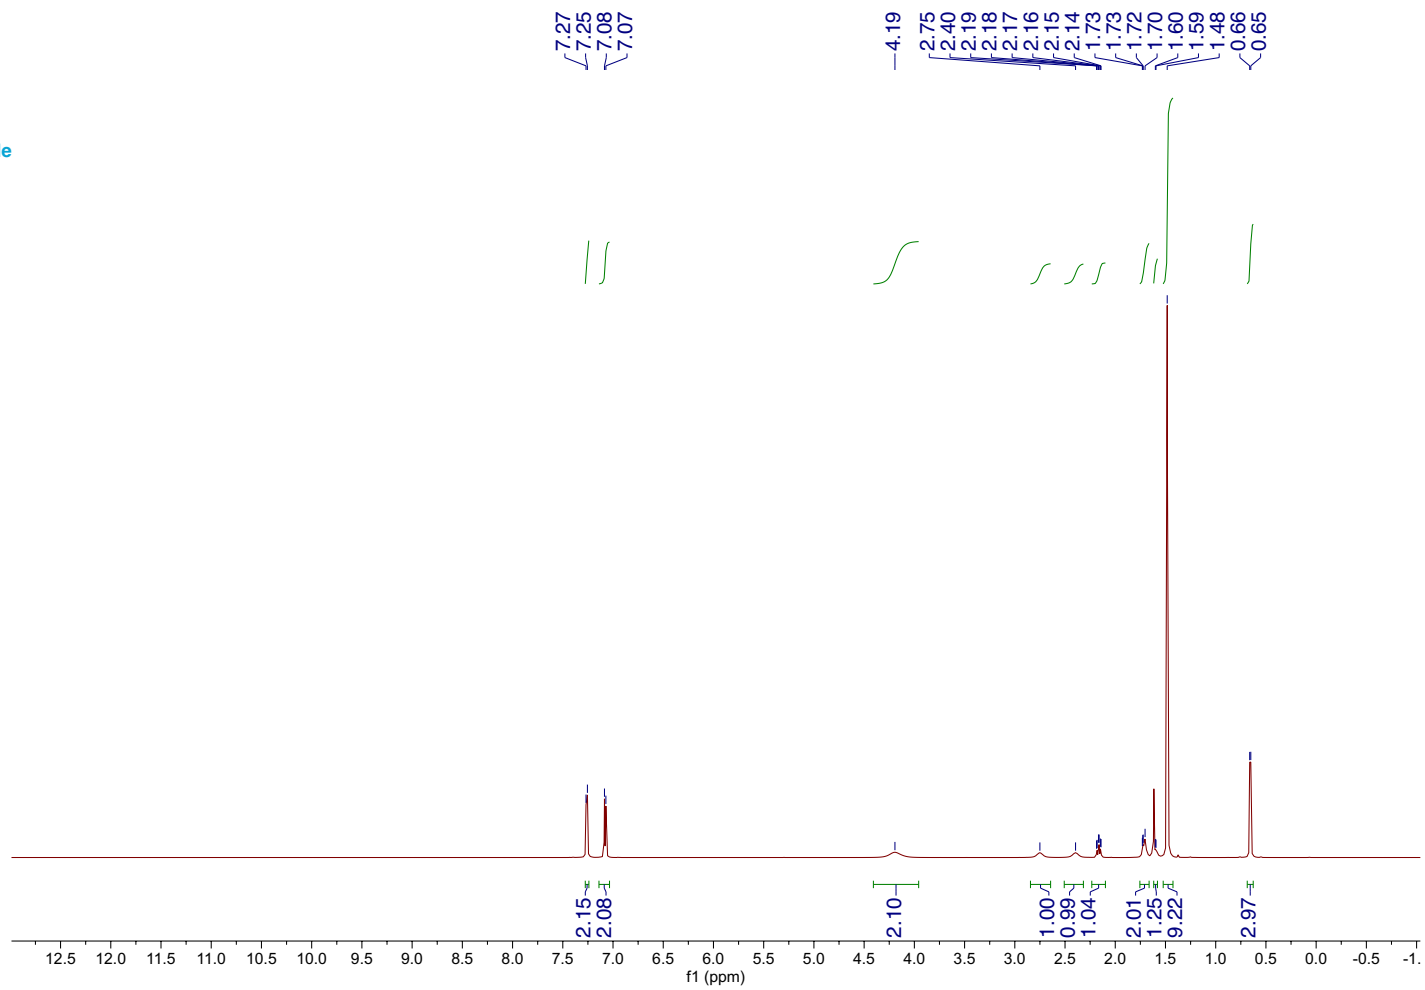

Compound 60  $^{13}\text{C}$  NMR

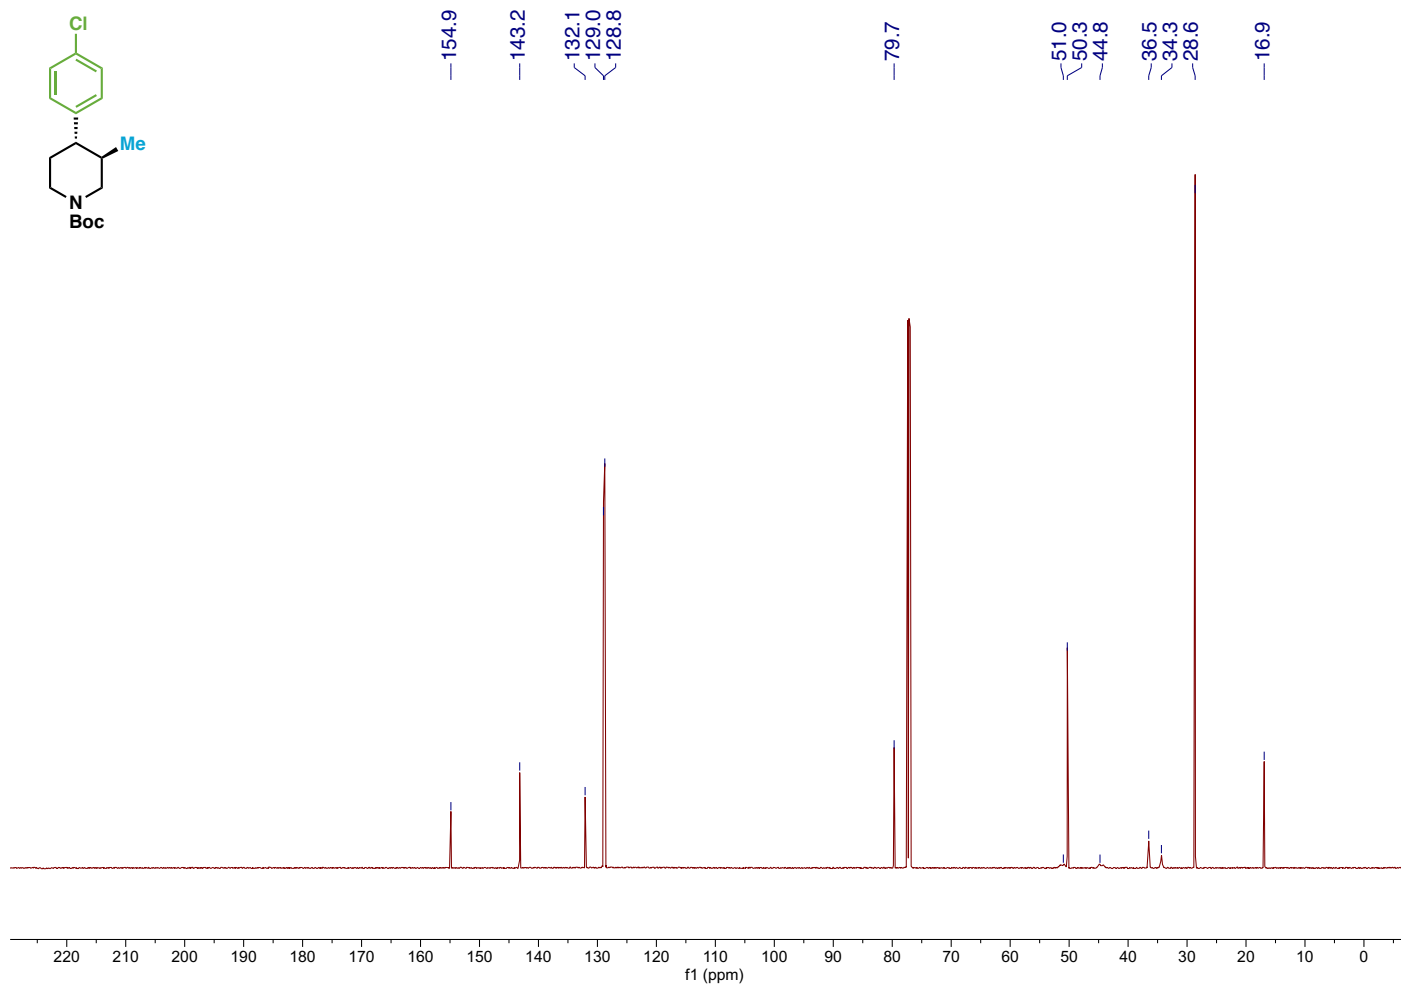



Compound 61 <sup>1</sup>H NMR

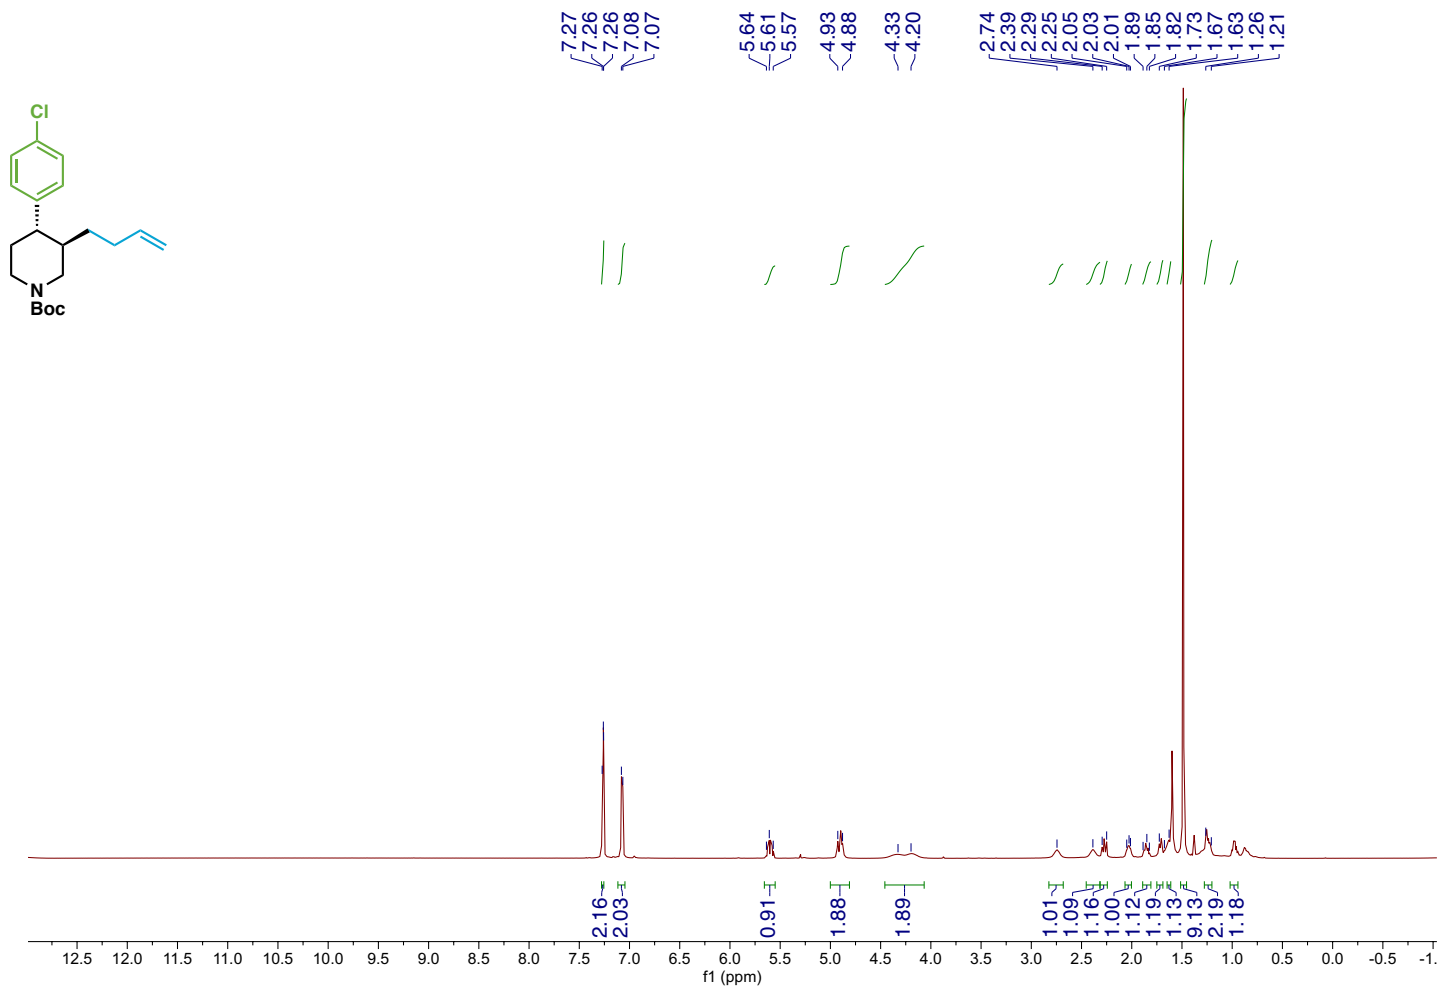

Compound 61 <sup>13</sup>C NMR

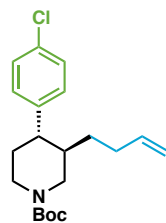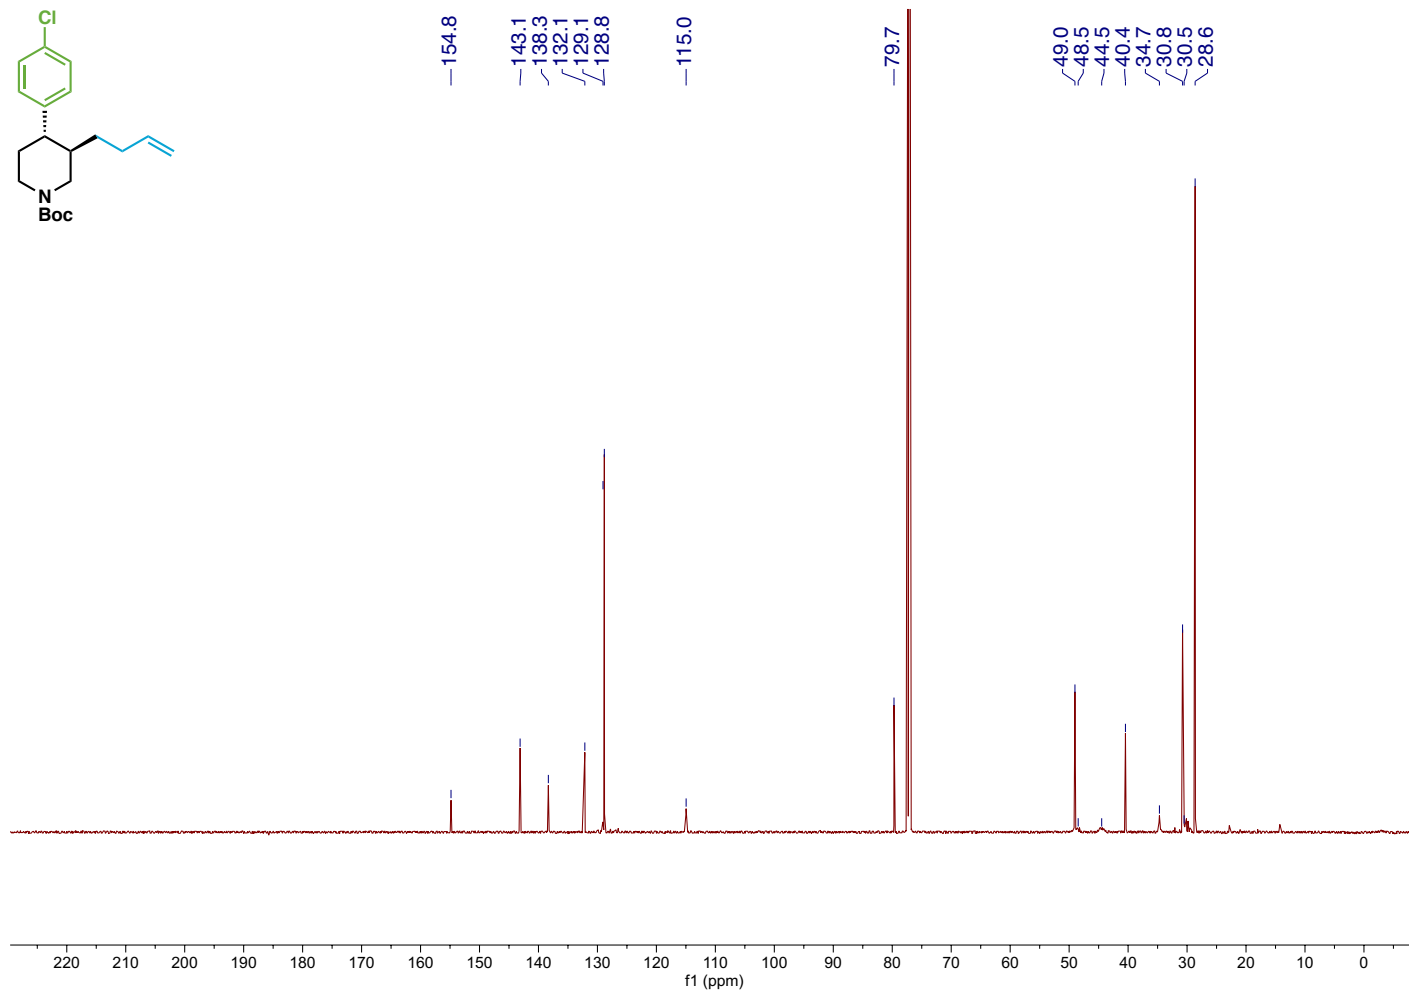



Compound 62 <sup>13</sup>C NMR

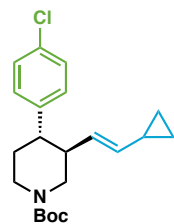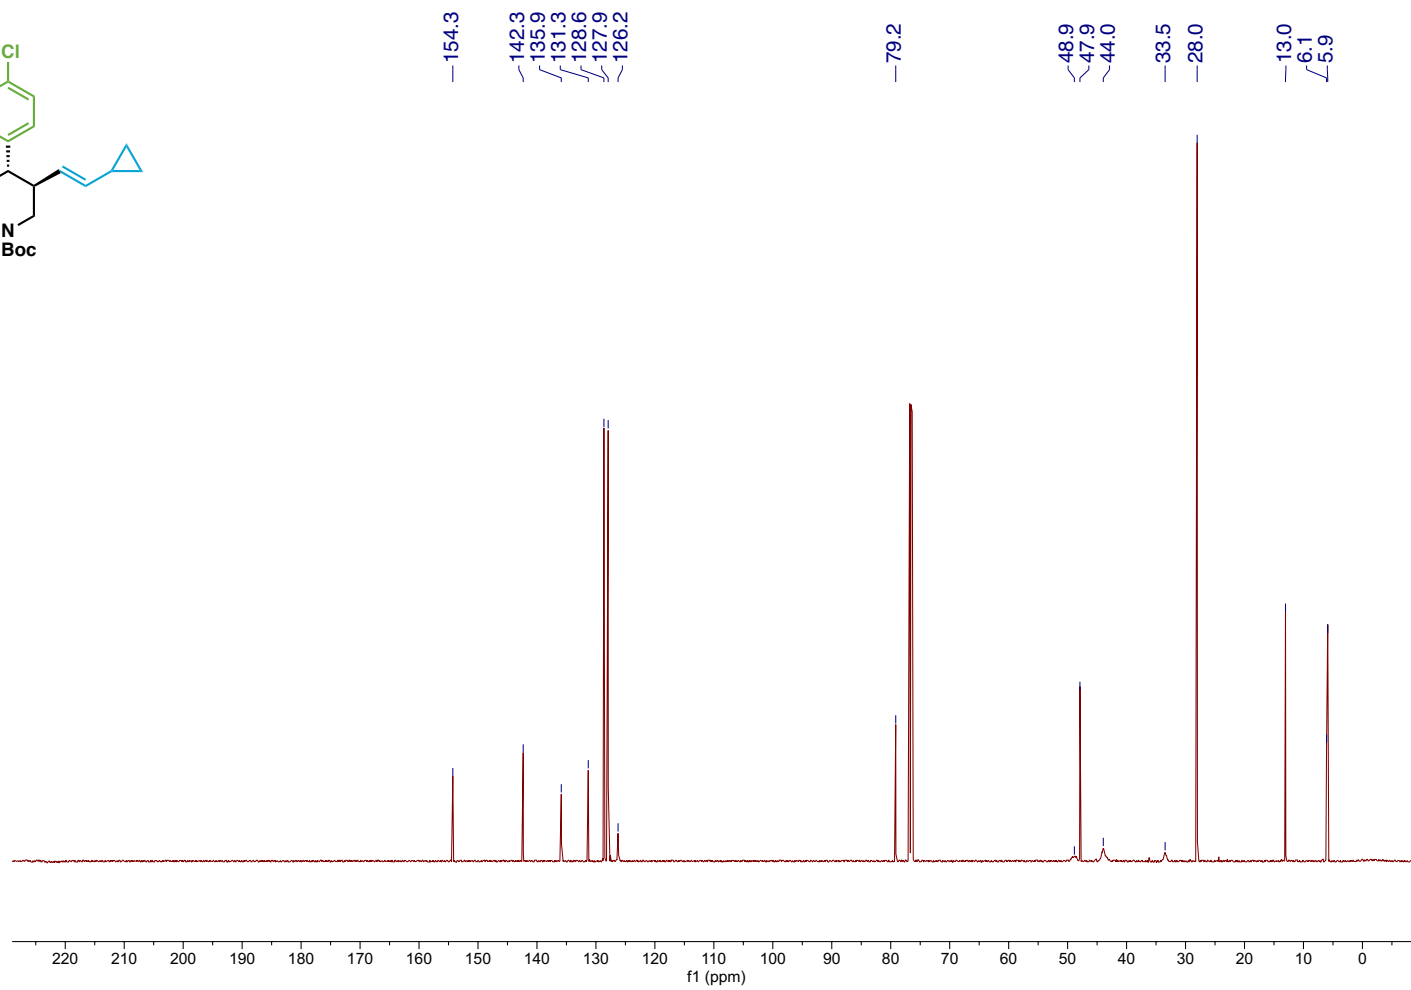

Compound 63 <sup>1</sup>H NMR

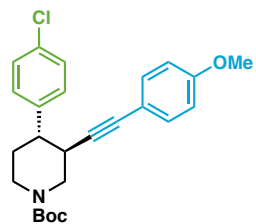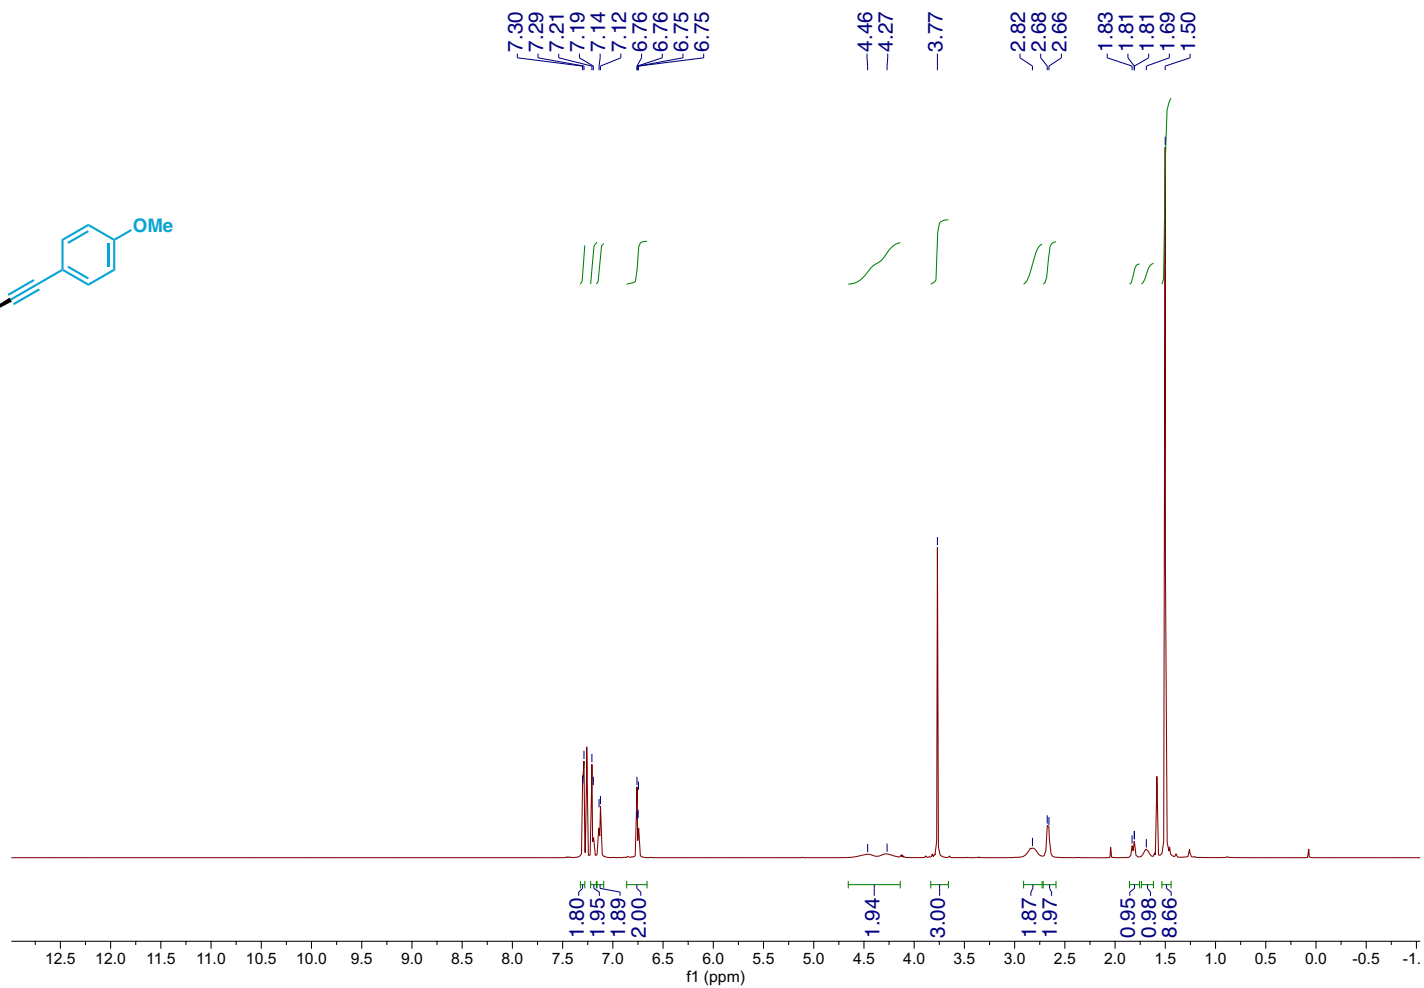

Compound 63 <sup>13</sup>C NMR

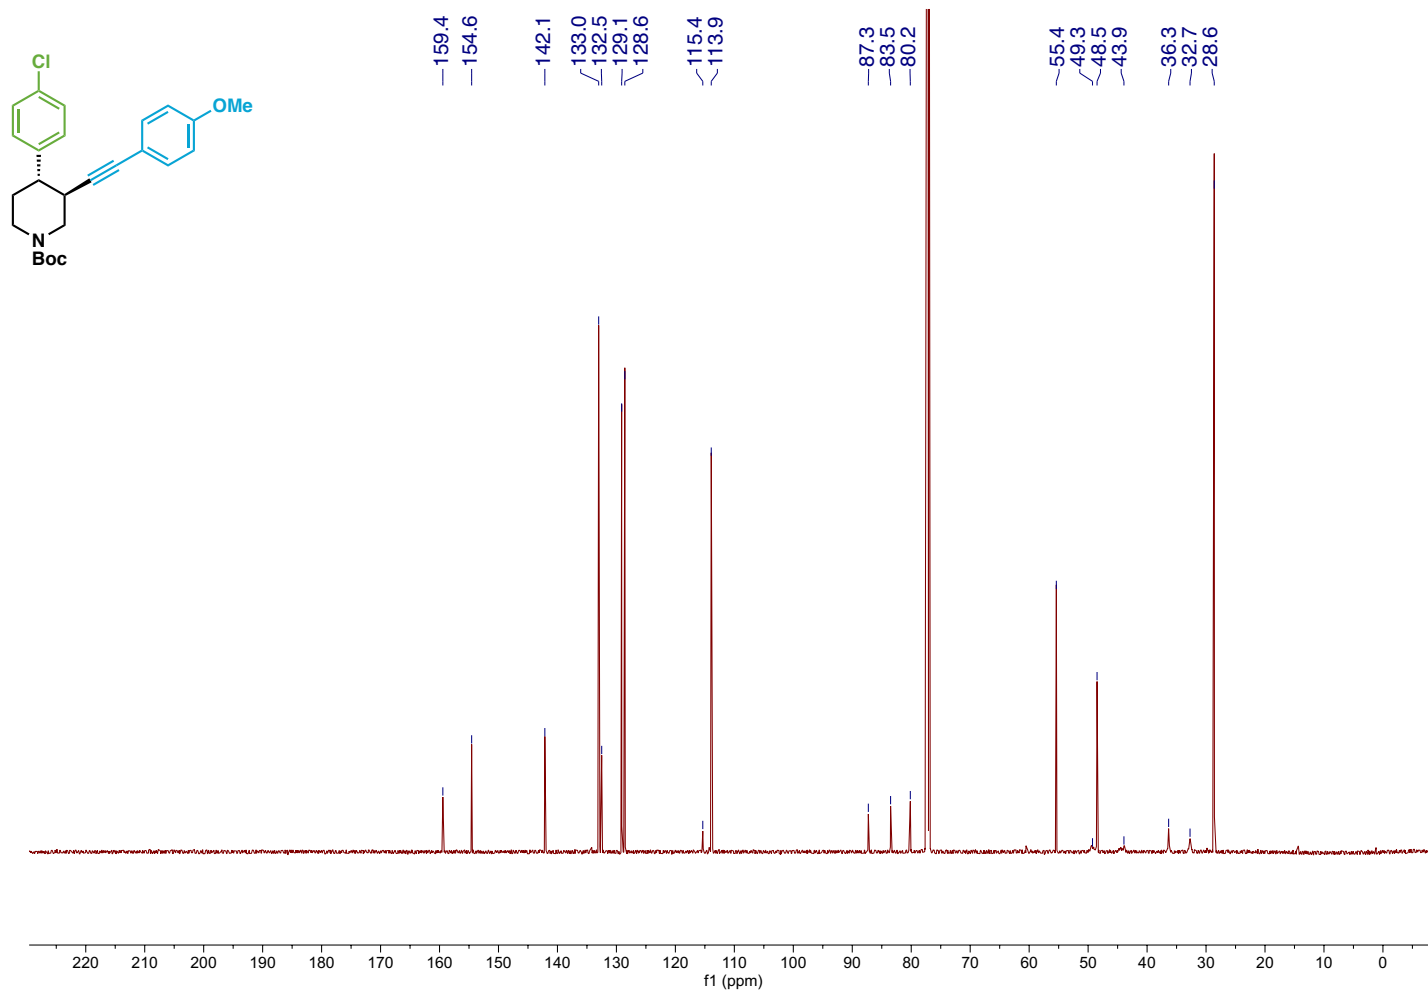

Compound 64 <sup>1</sup>H NMR

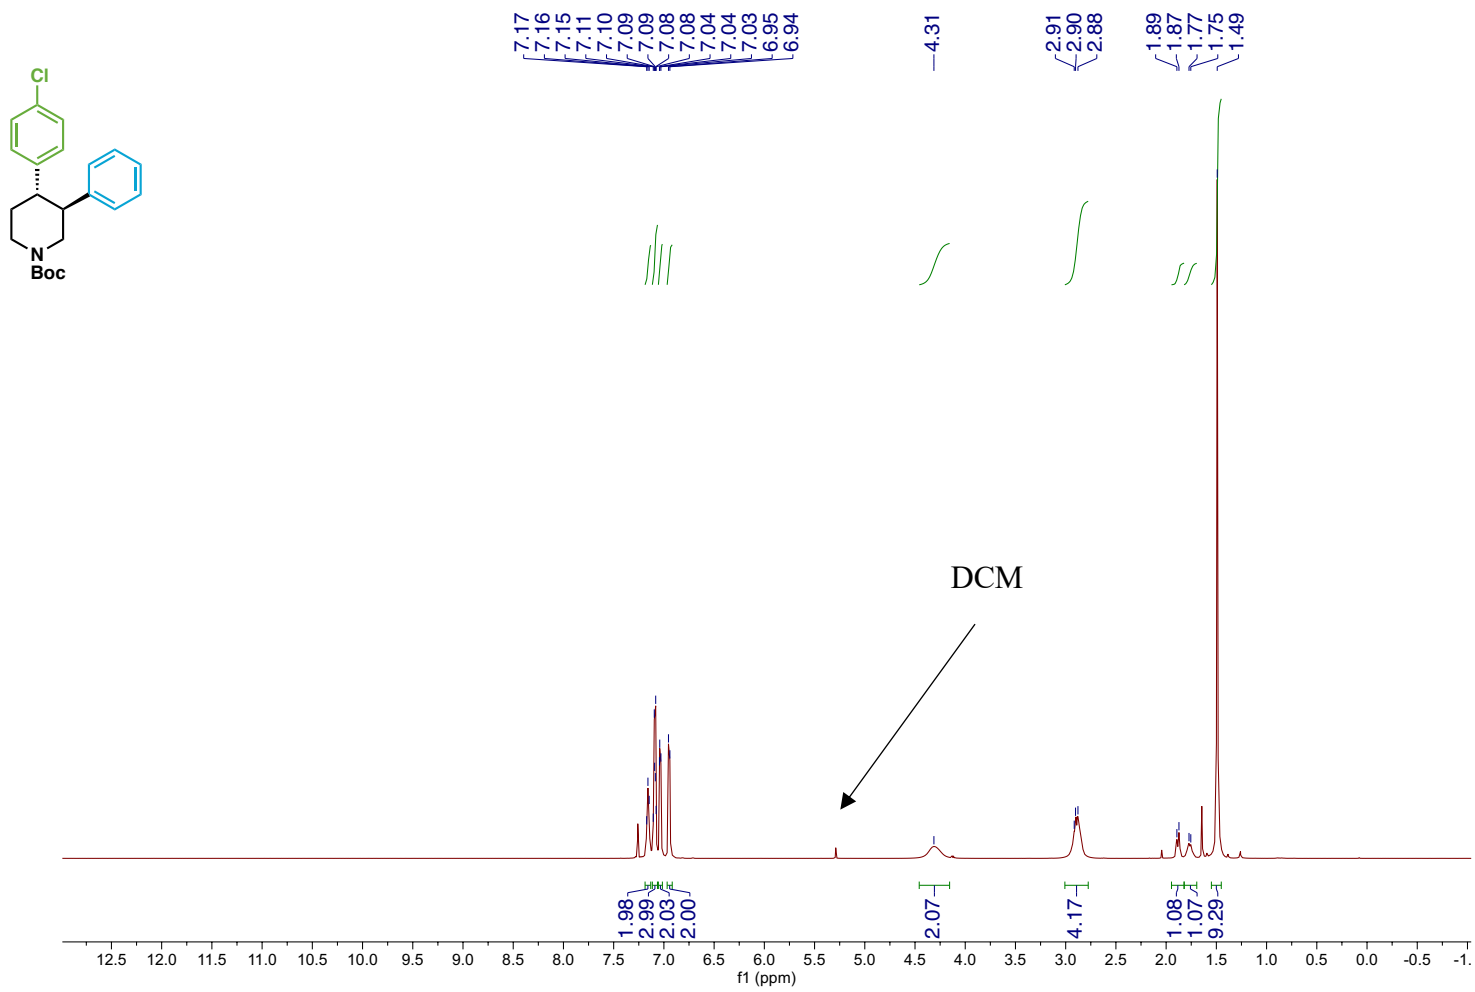

Compound 64 <sup>13</sup>C NMR

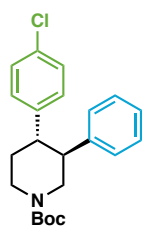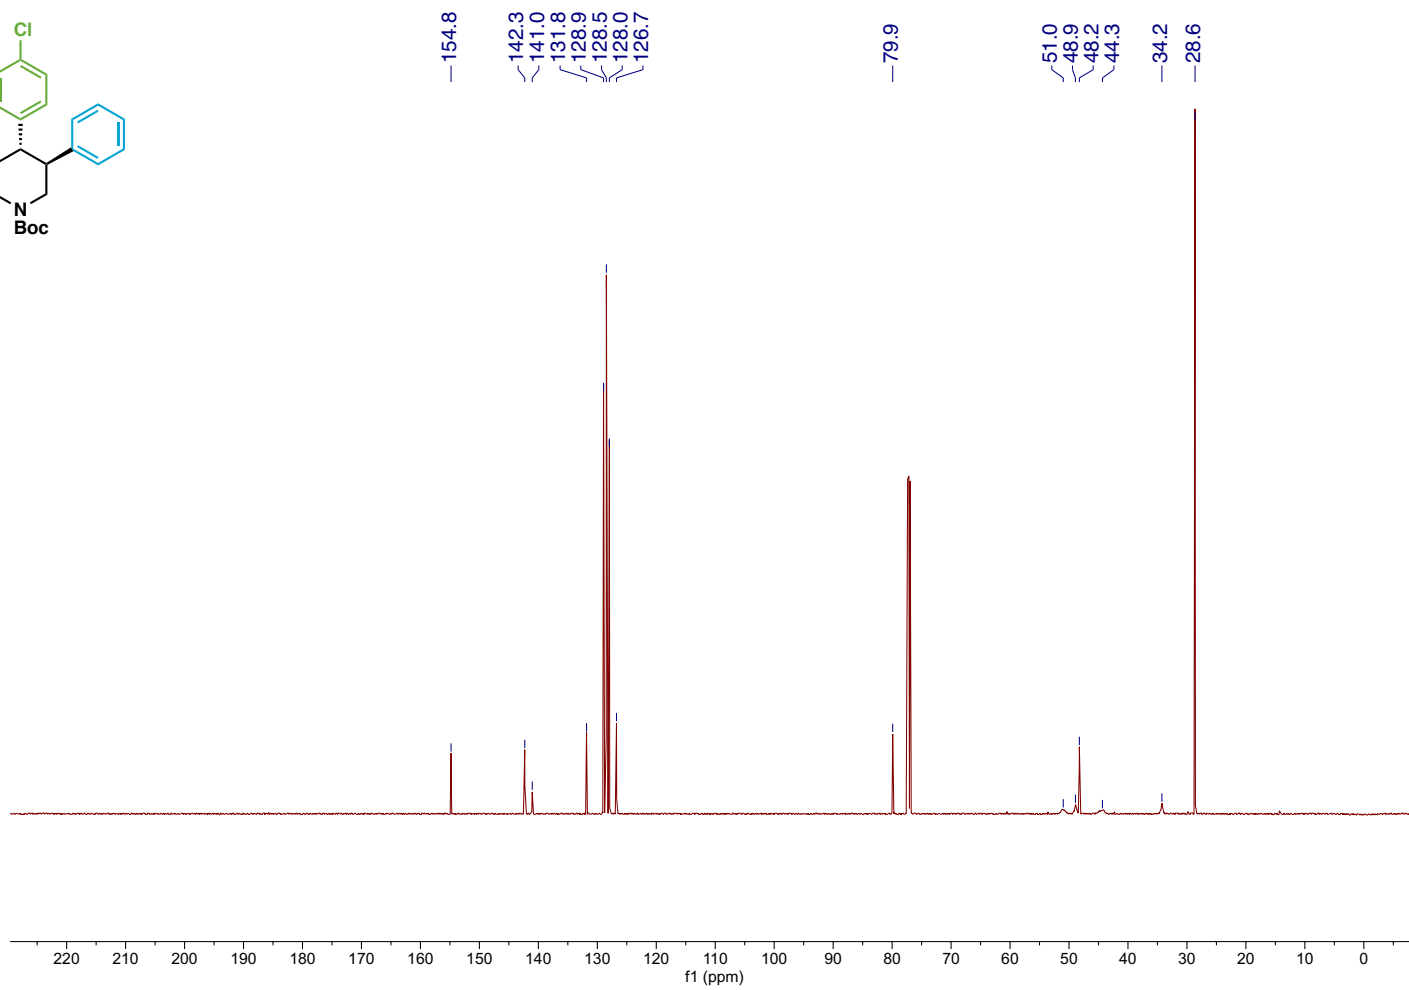



Compound 65 <sup>1</sup>H NMR

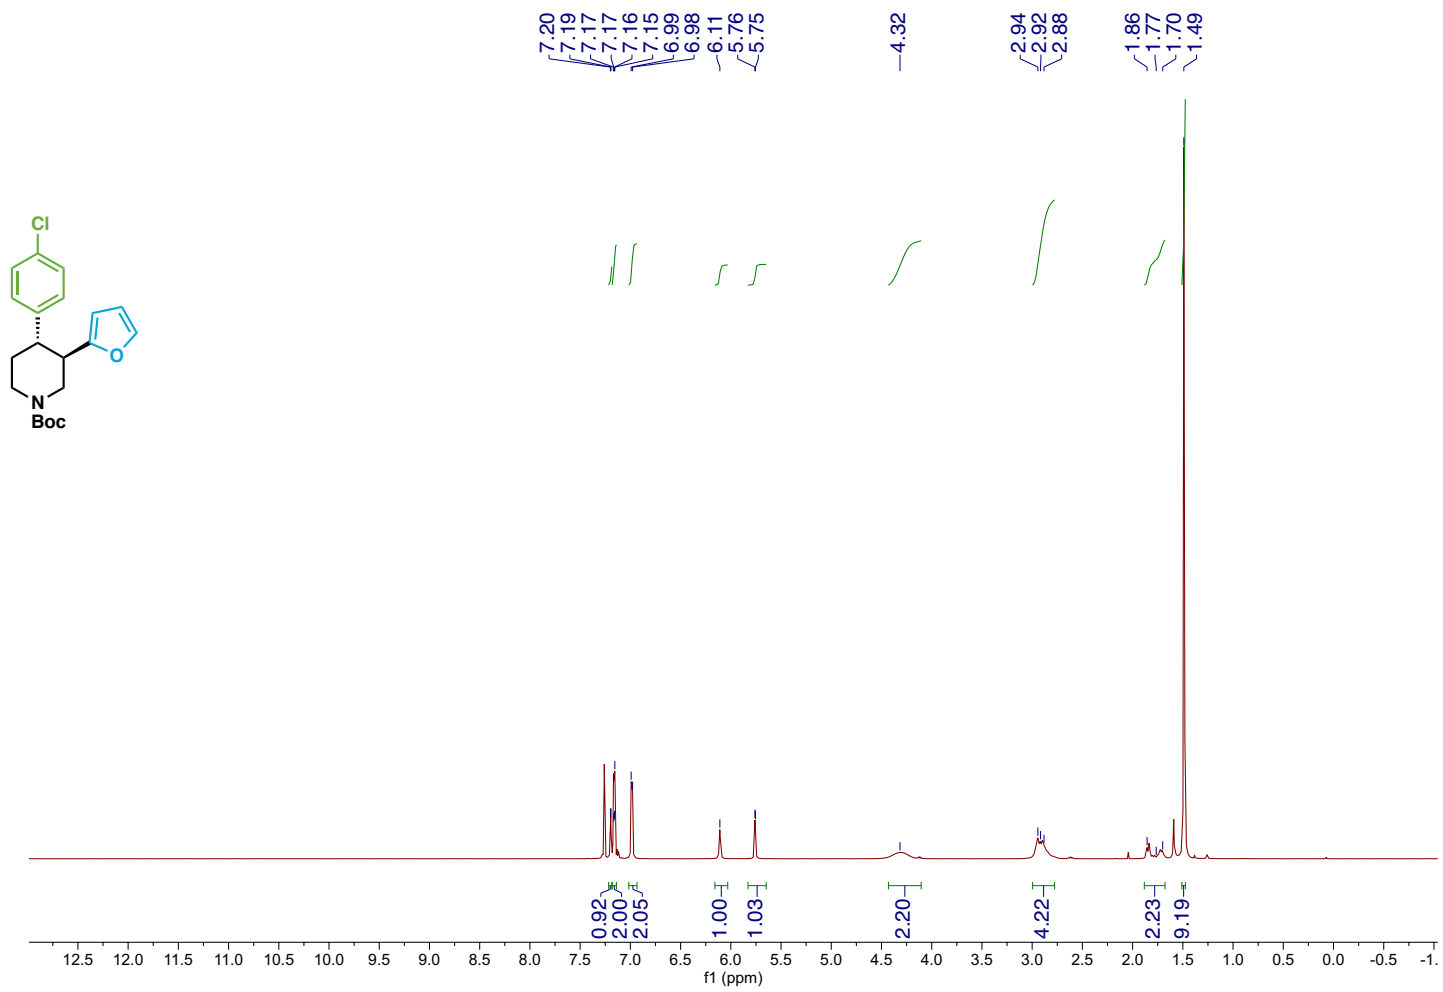

Compound 65 <sup>13</sup>C NMR

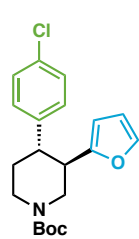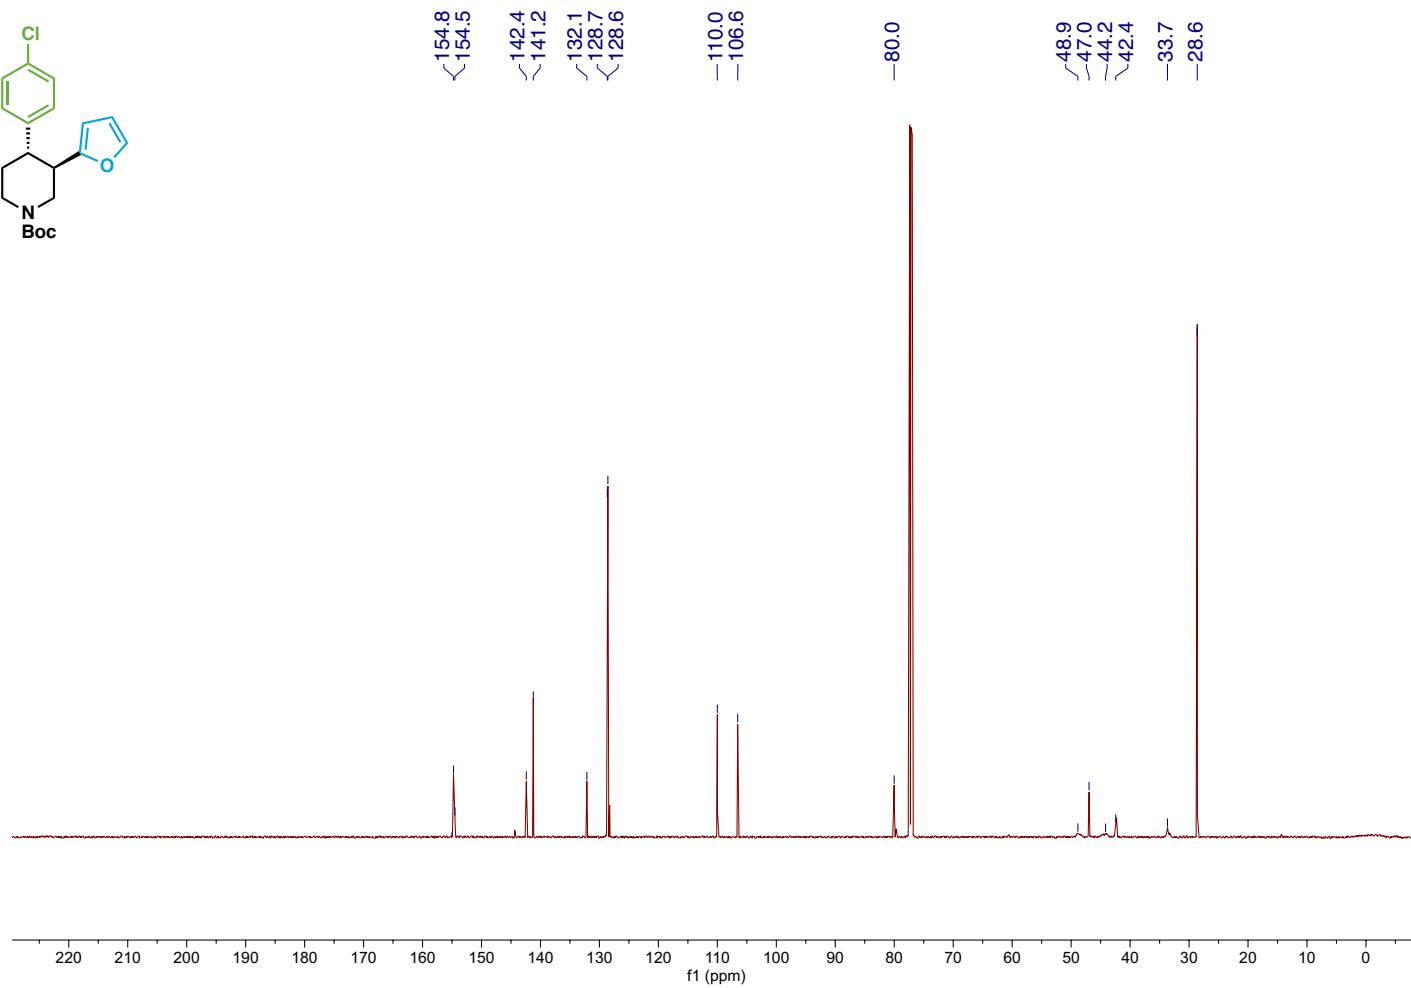

# Compound SI-3 <sup>1</sup>H NMR

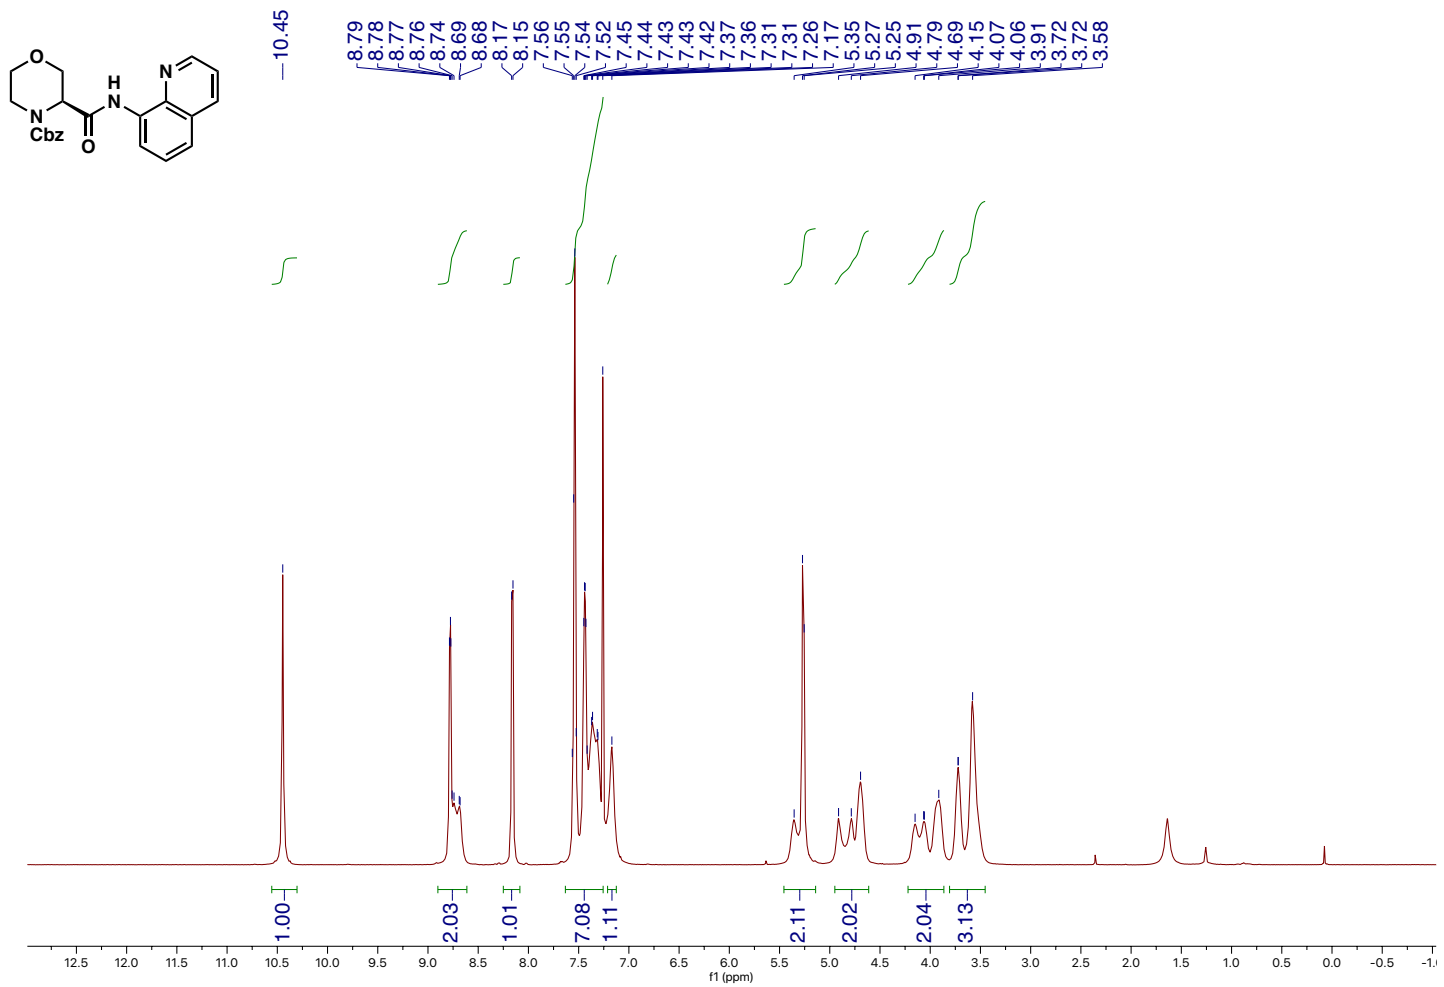

Compound SI-3 <sup>13</sup>C NMR

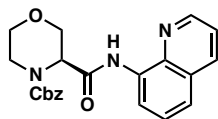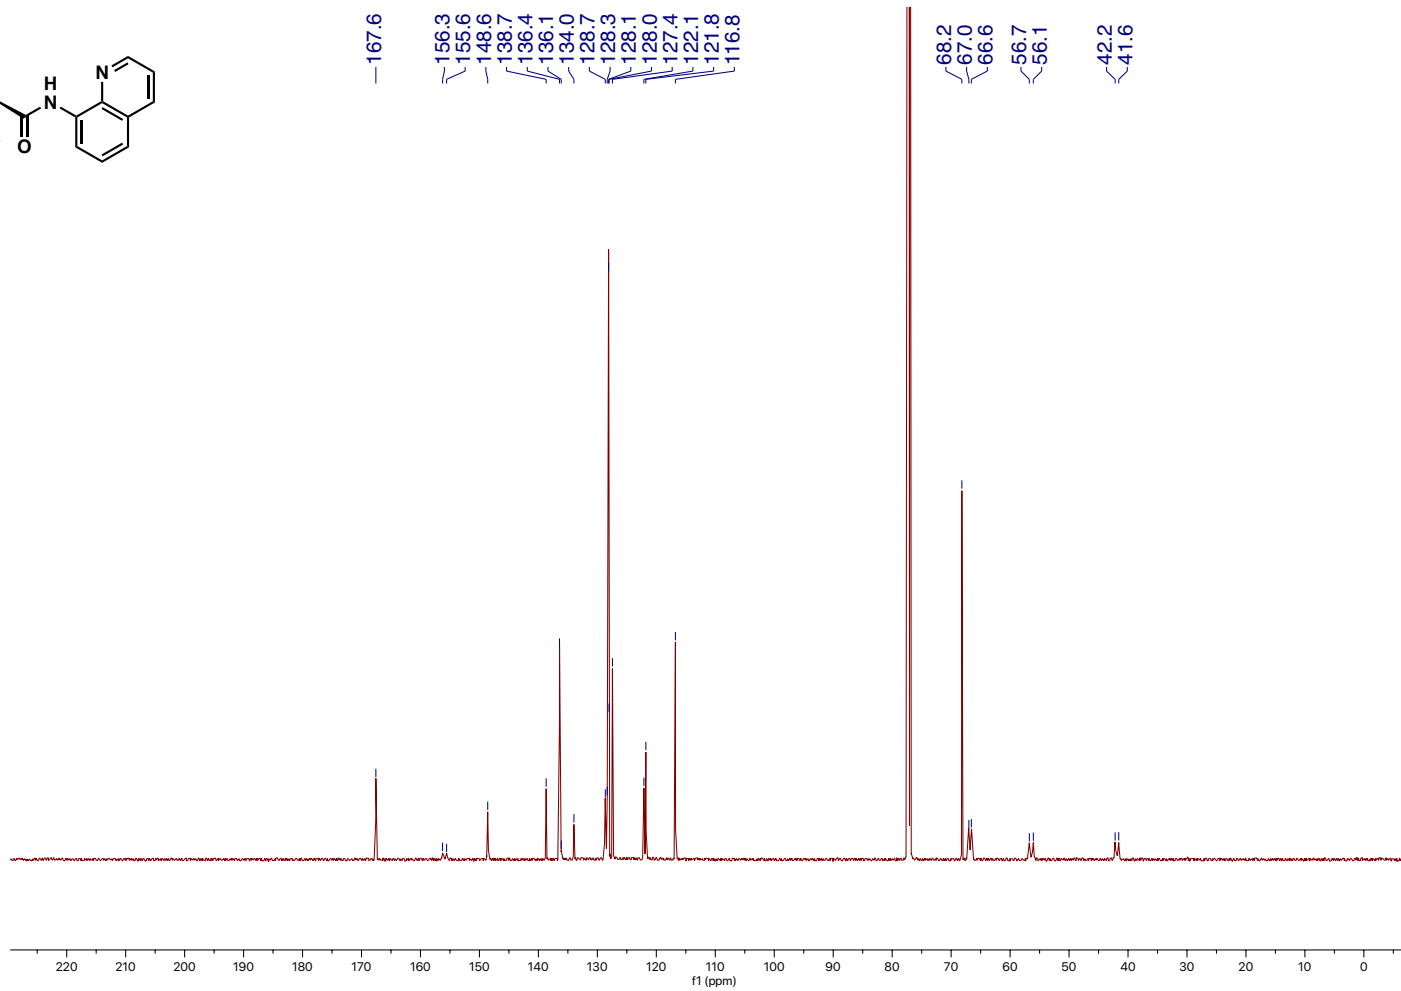

Compound SI-4 <sup>1</sup>H NMR

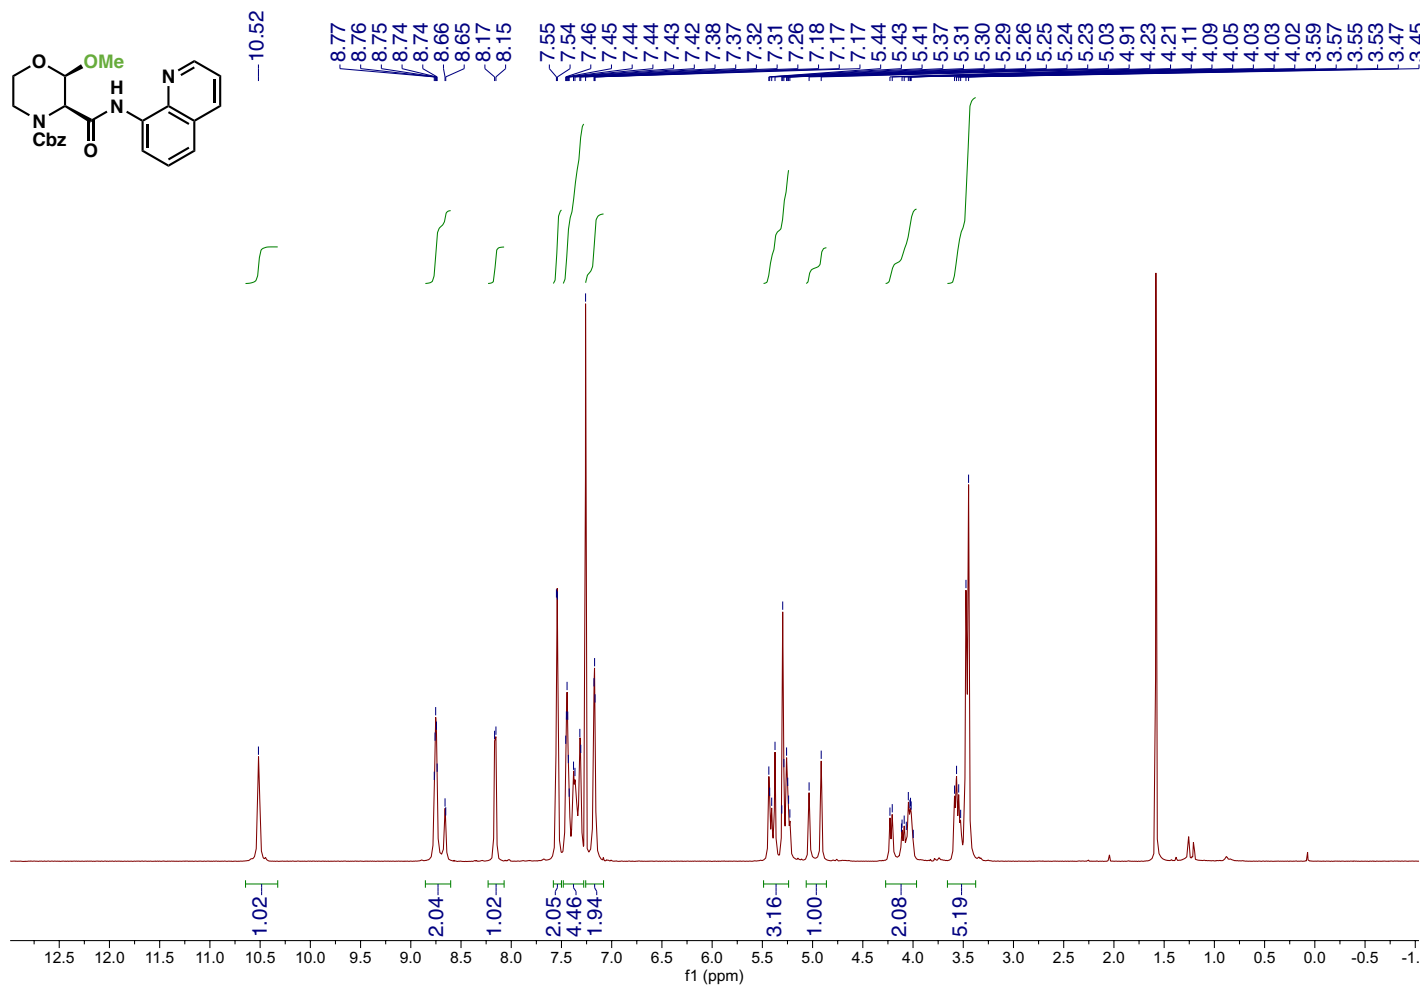

Compound SI-4 <sup>13</sup>C NMR

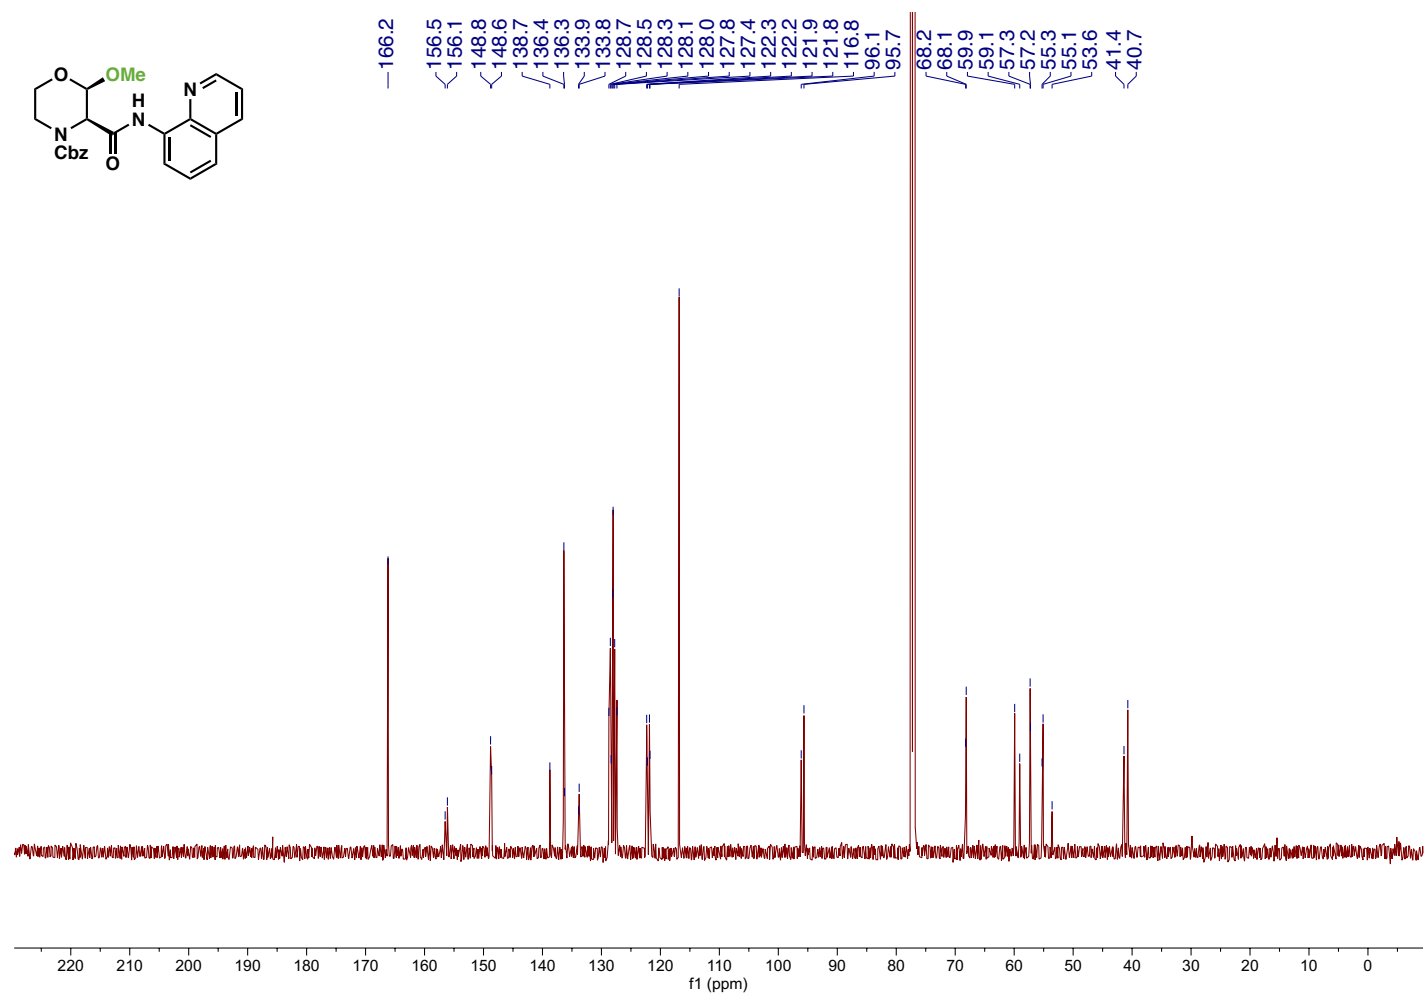

Compound B16 <sup>1</sup>H NMR

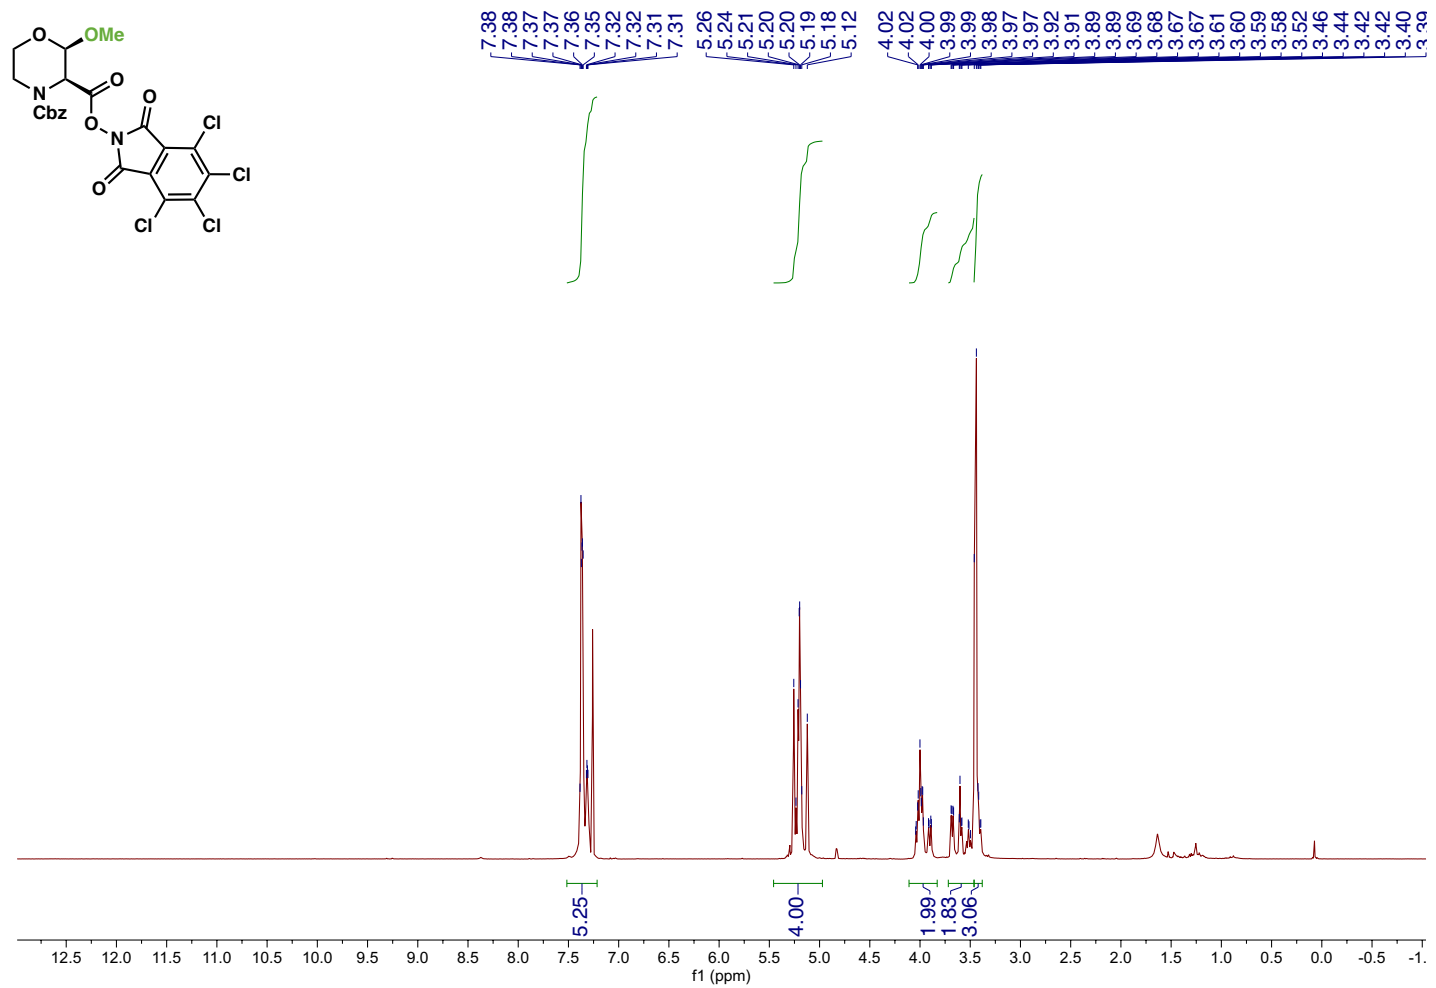

Compound B16 <sup>13</sup>C NMR

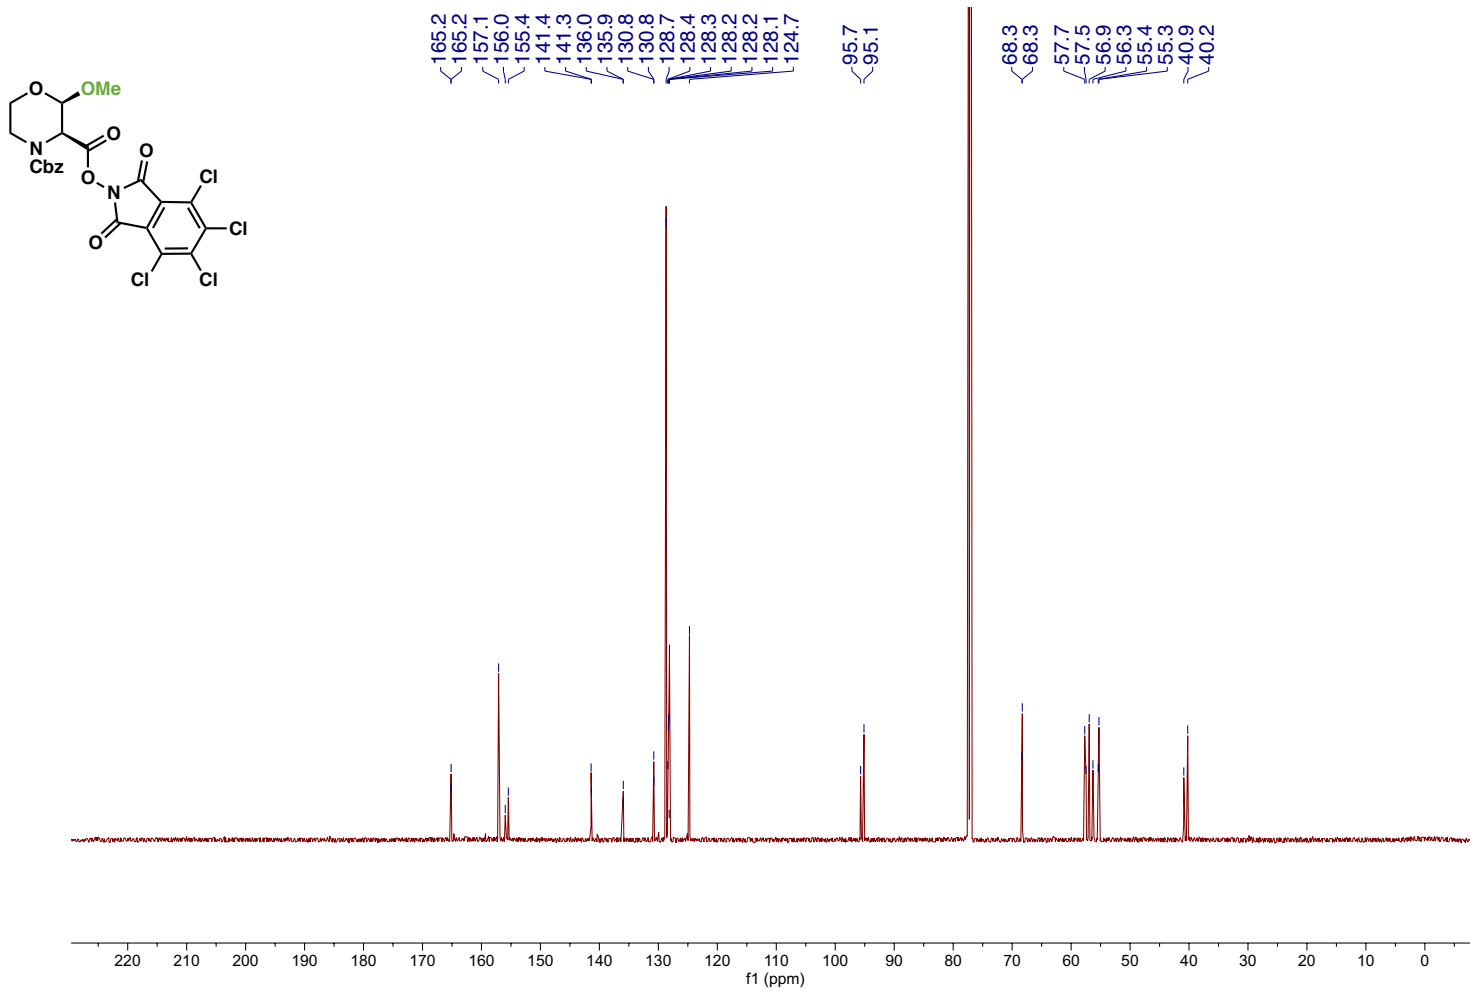



Compound 66 <sup>1</sup>H NMR

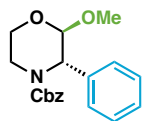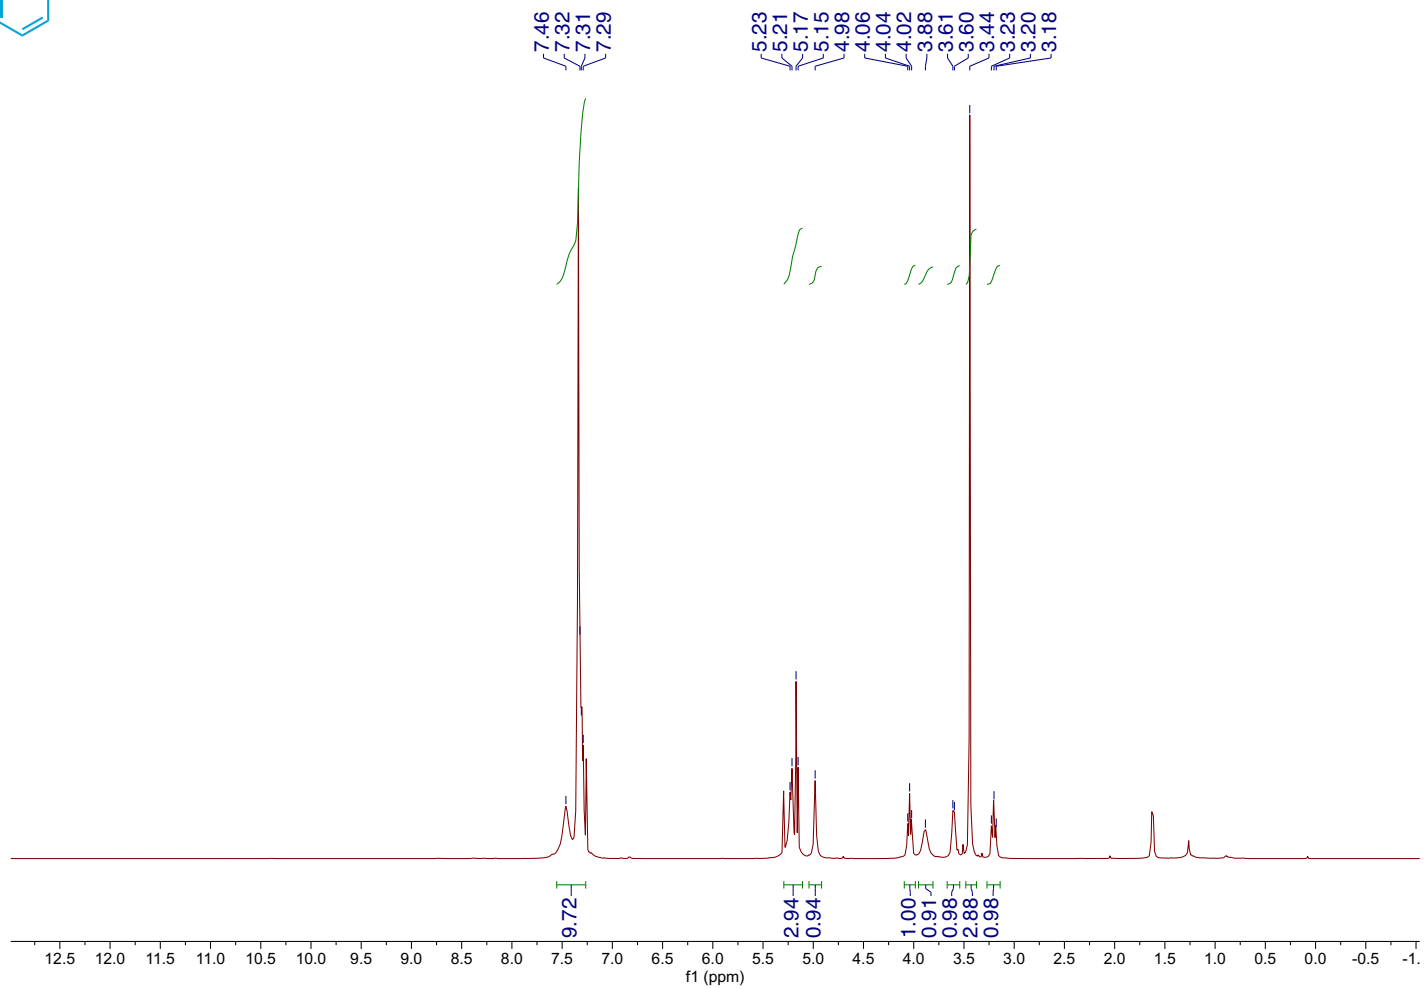

Compound 66  $^{13}\text{C}$  NMR

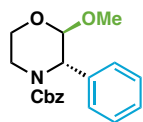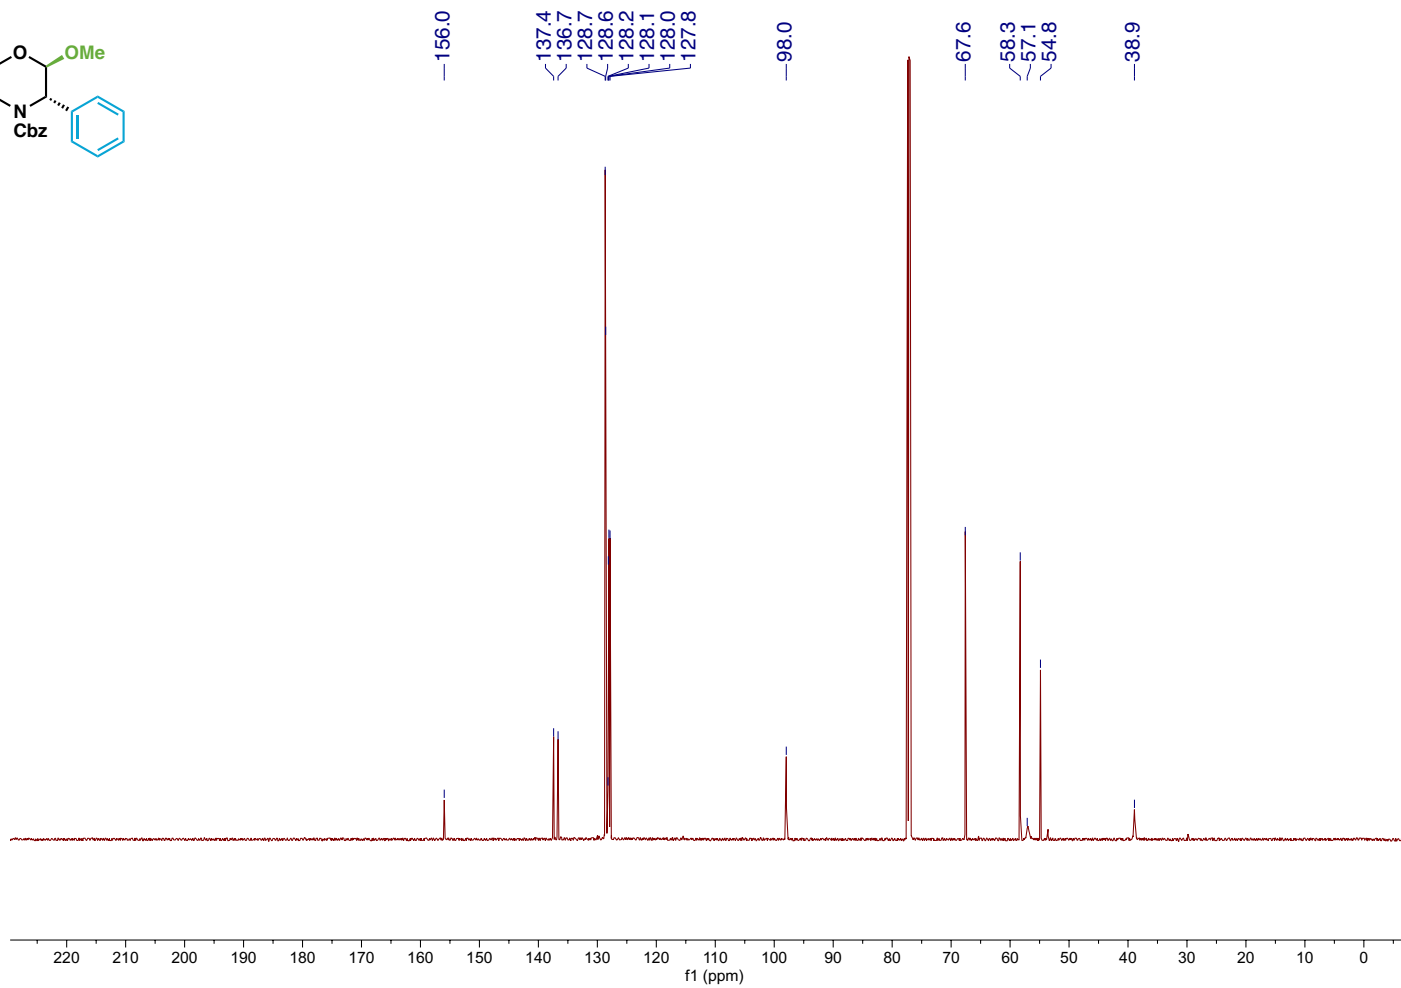

Compound 67 <sup>1</sup>H NMR

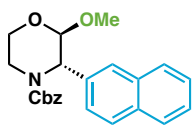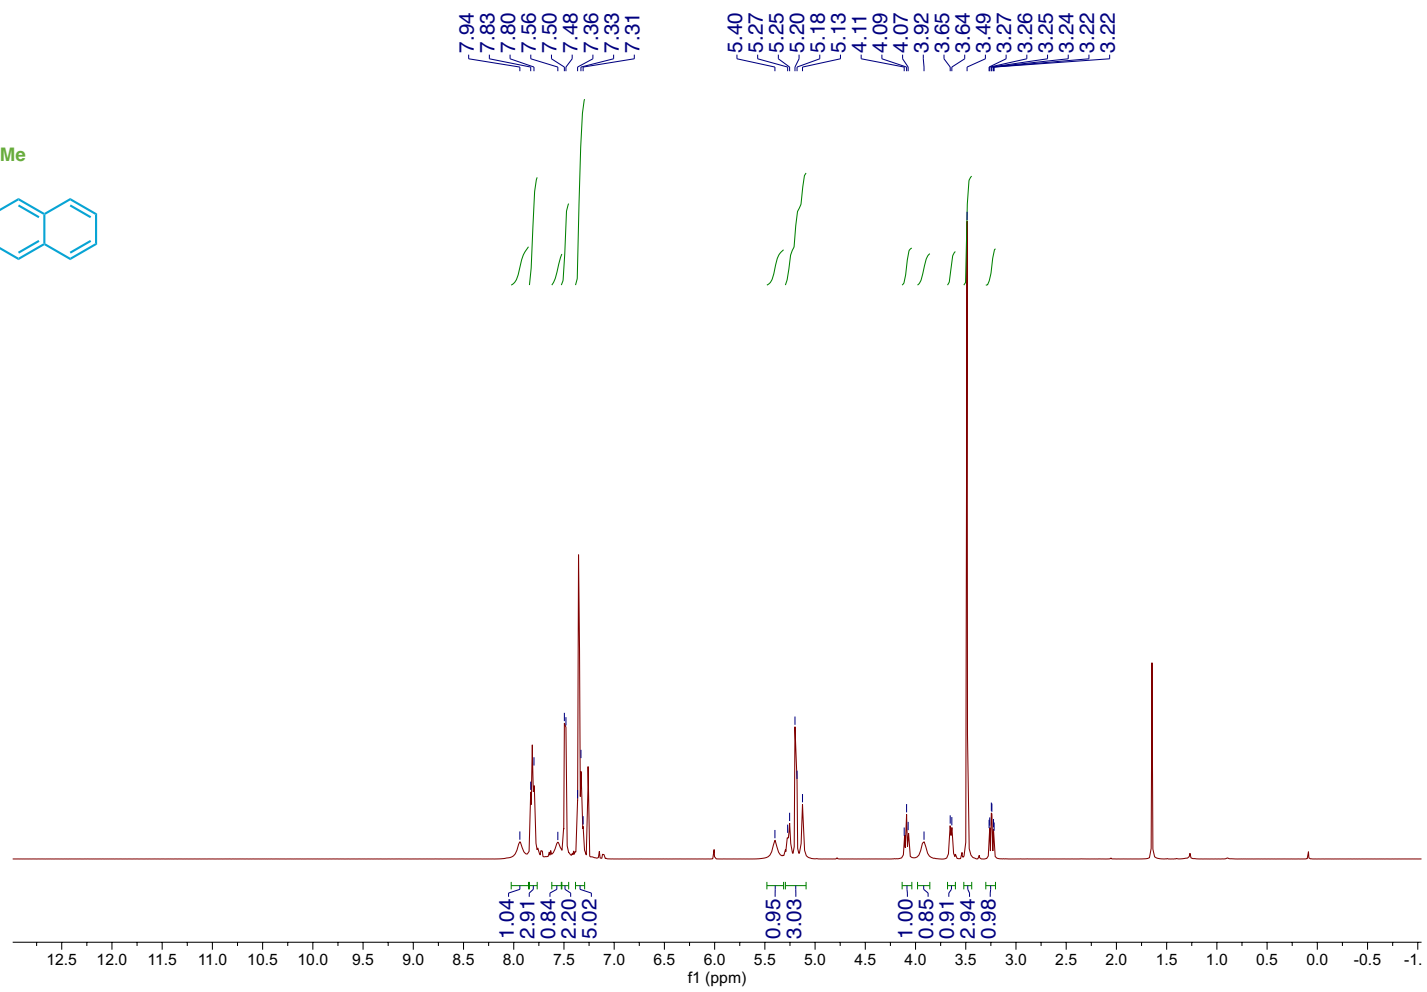

Compound 67  $^{13}\text{C}$  NMR

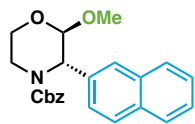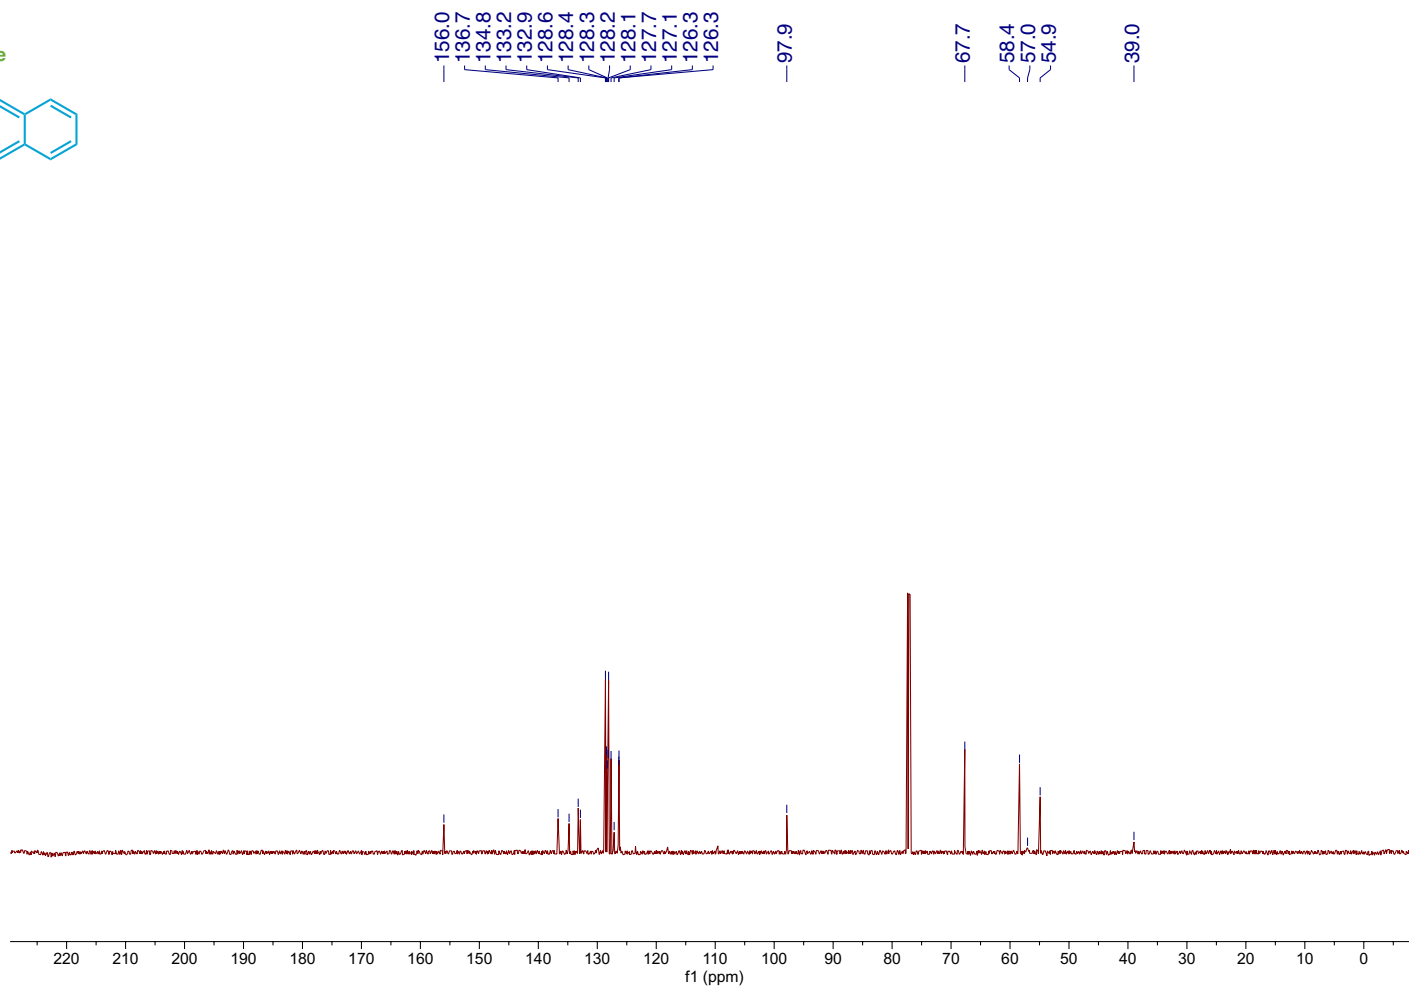

Compound 68 <sup>1</sup>H NMR

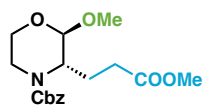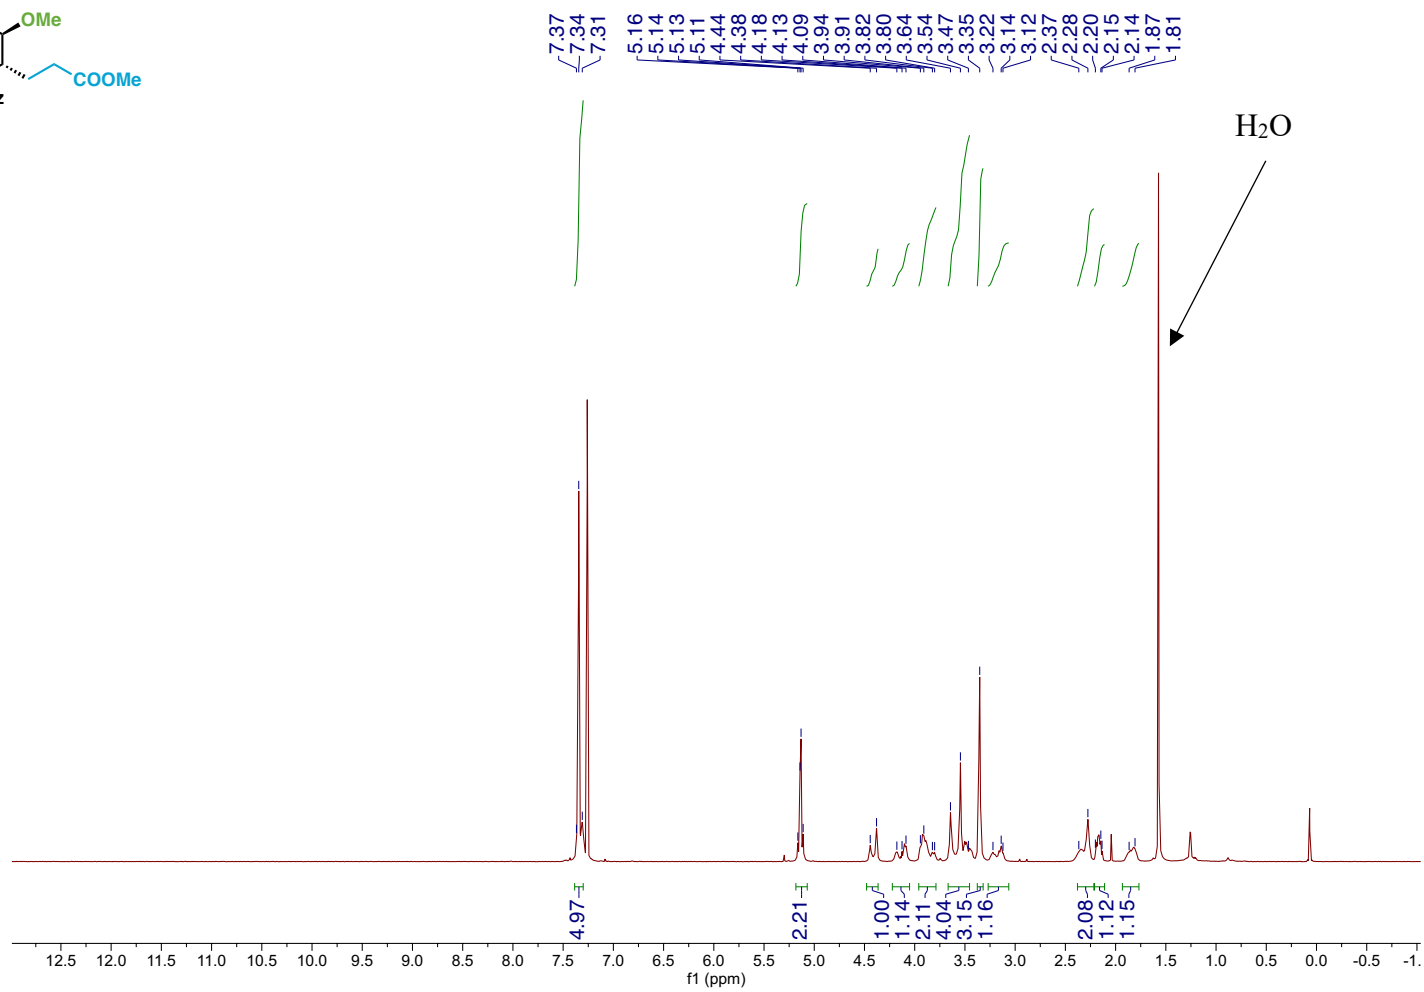

# Compound 68 <sup>13</sup>C NMR

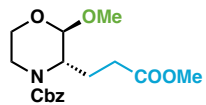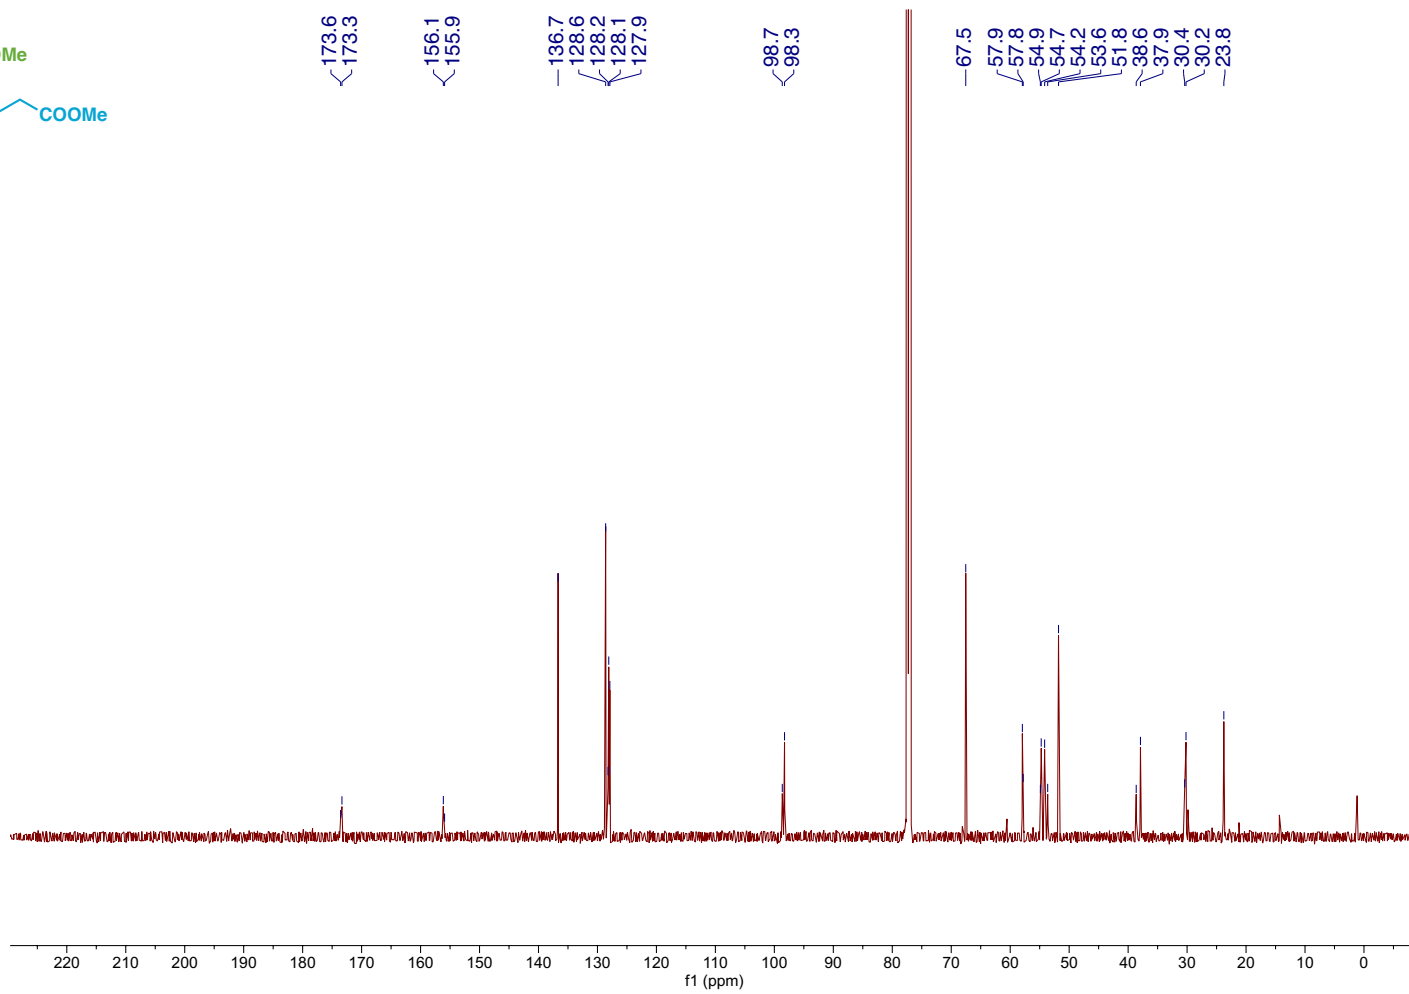

Compound SI-42 <sup>1</sup>H NMR

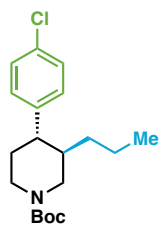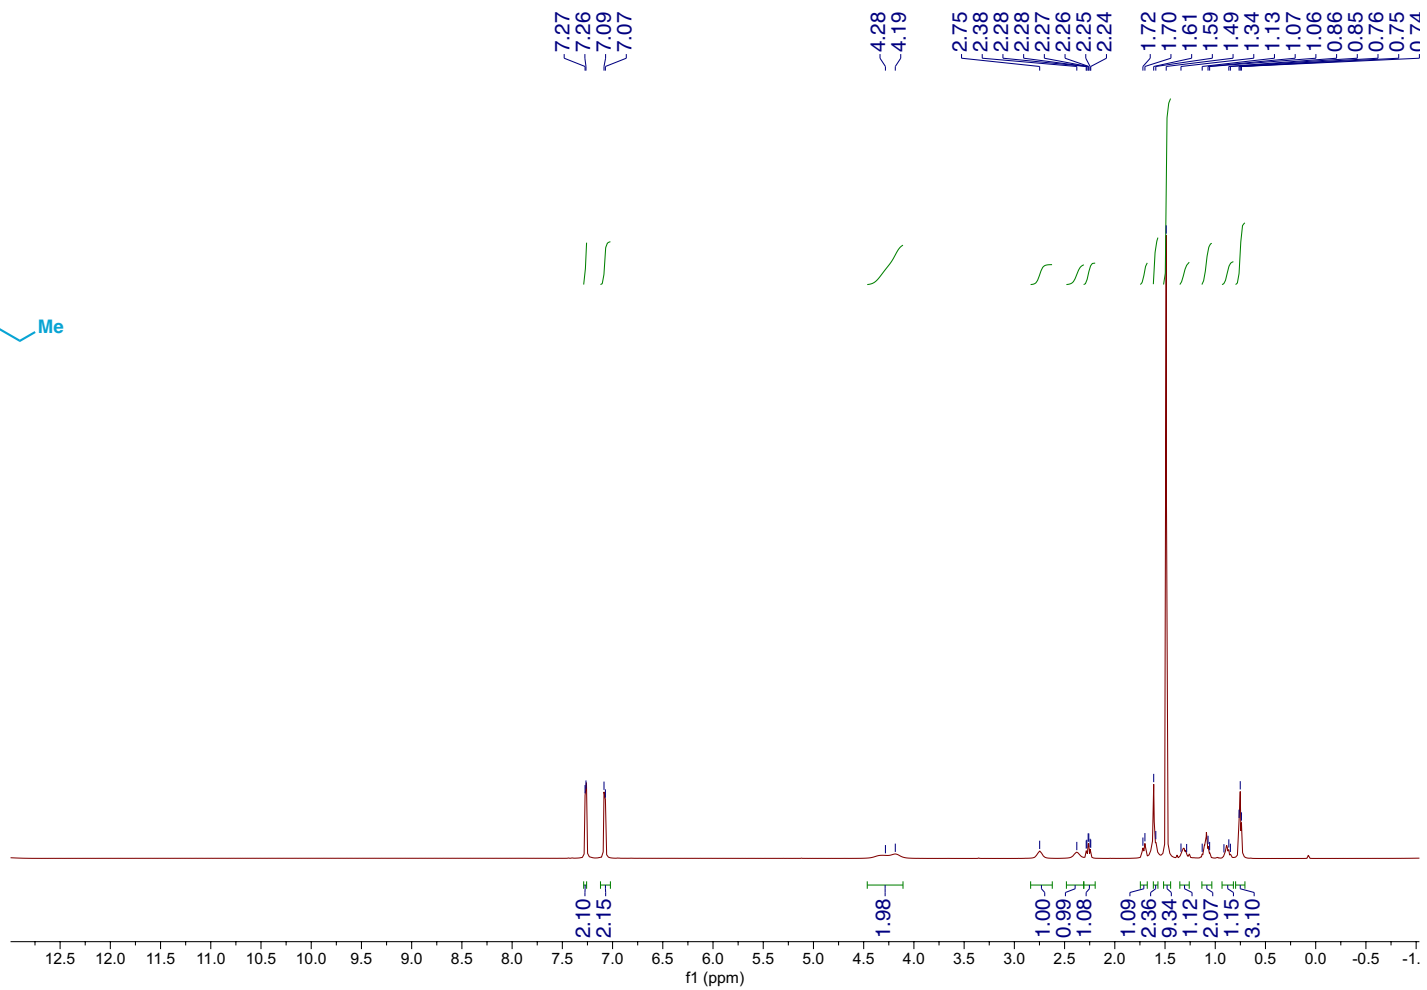

Compound SI-42 <sup>13</sup>C NMR

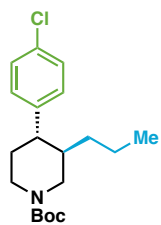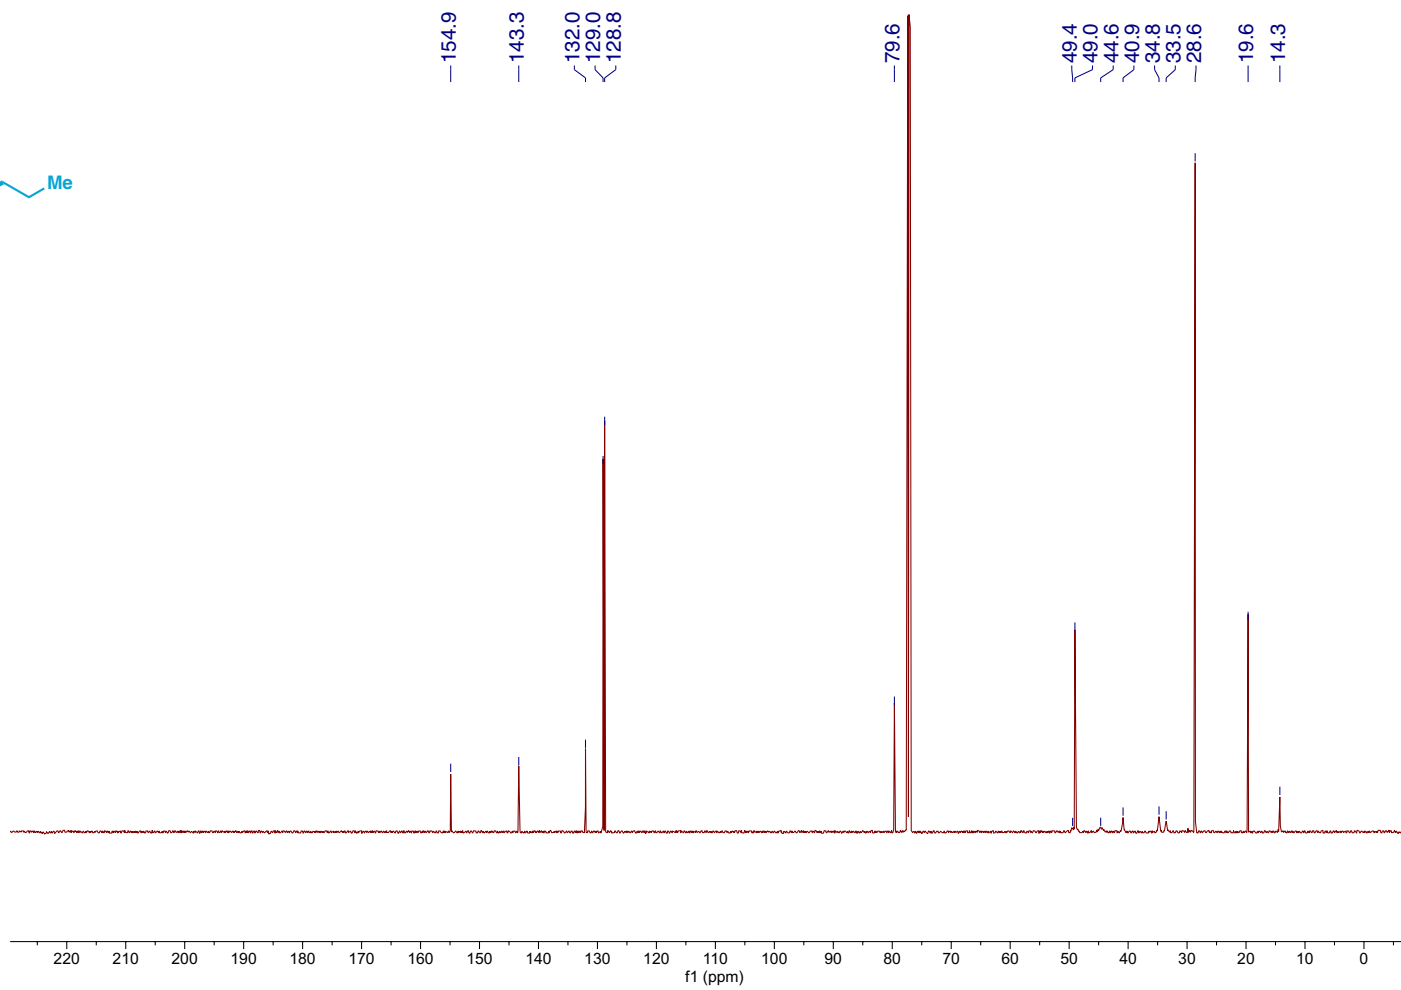



Compound 69 <sup>1</sup>H NMR

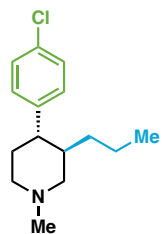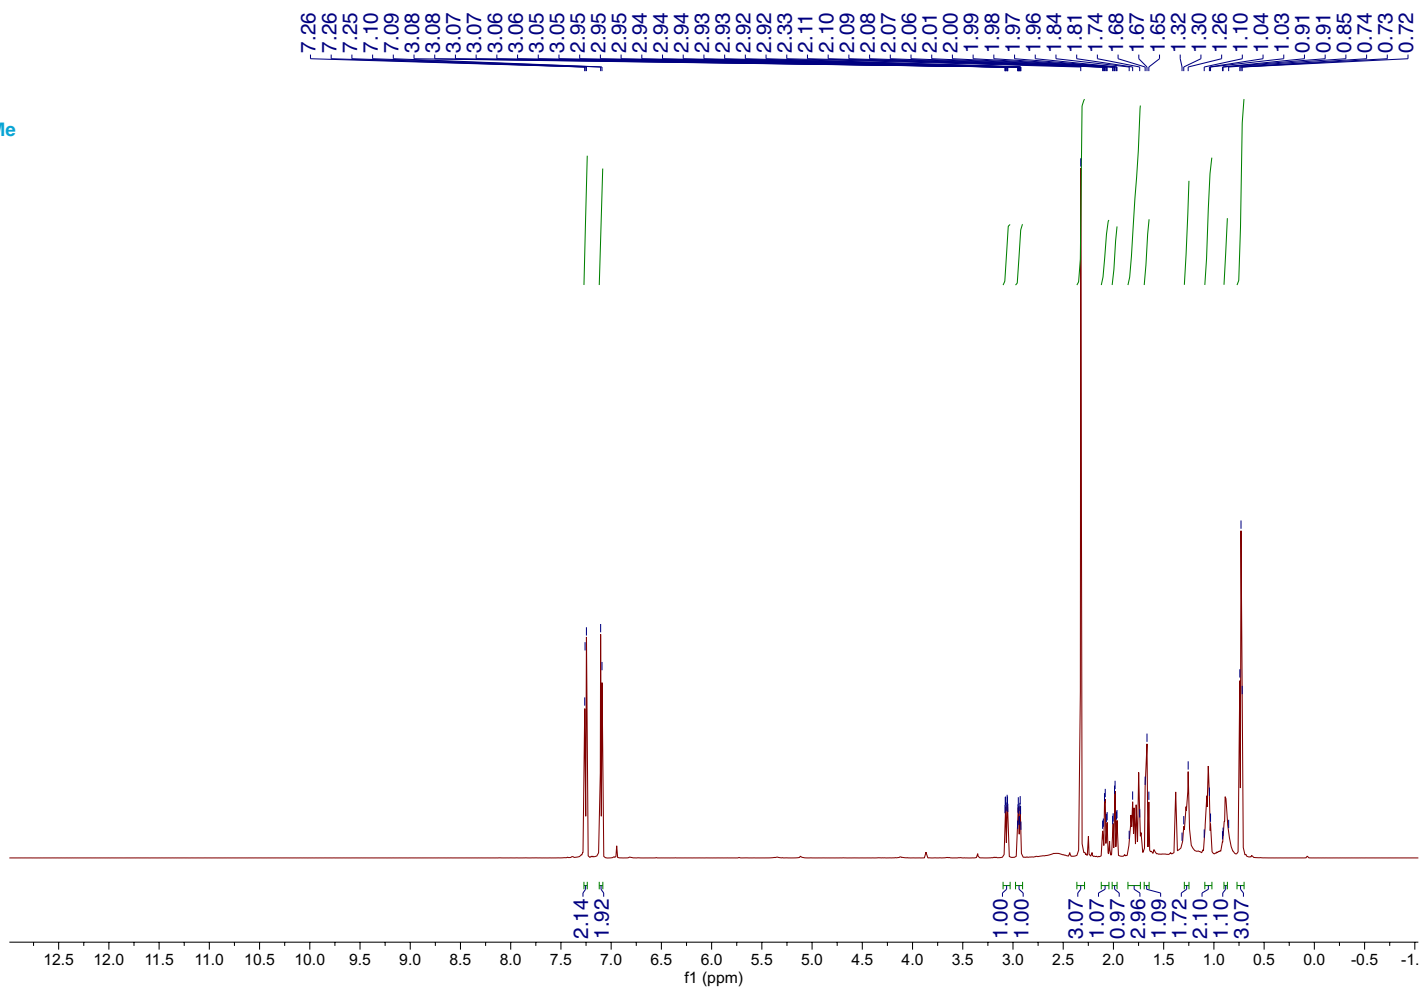

Compound 69 <sup>13</sup>C NMR

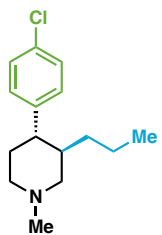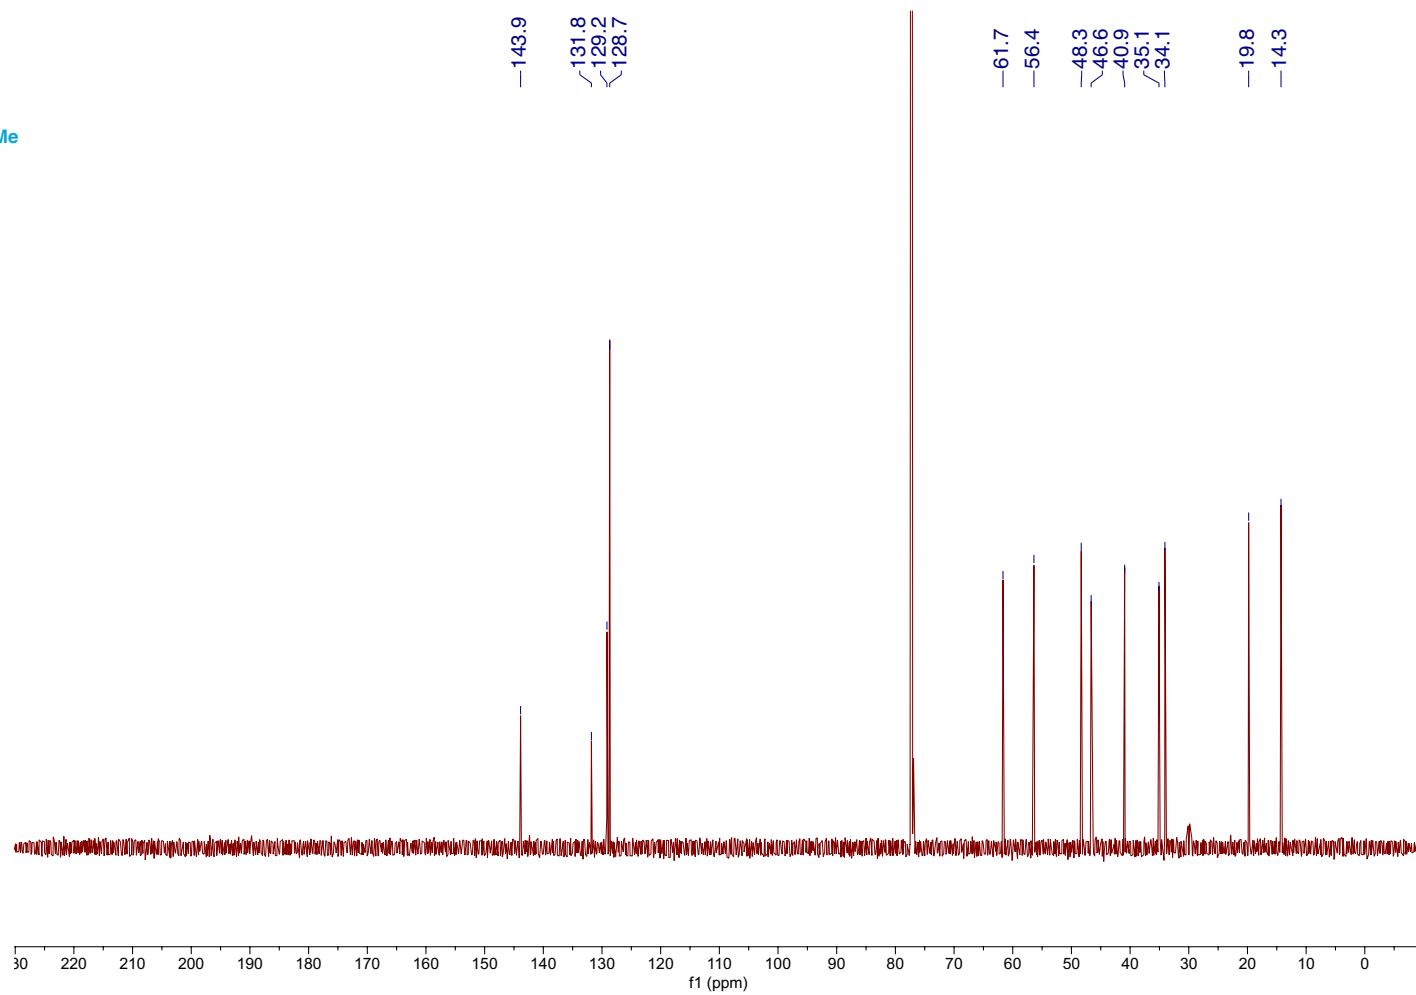



# Compound SI-43 <sup>13</sup>C NMR

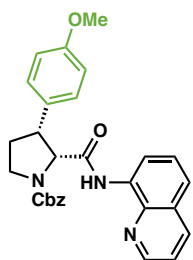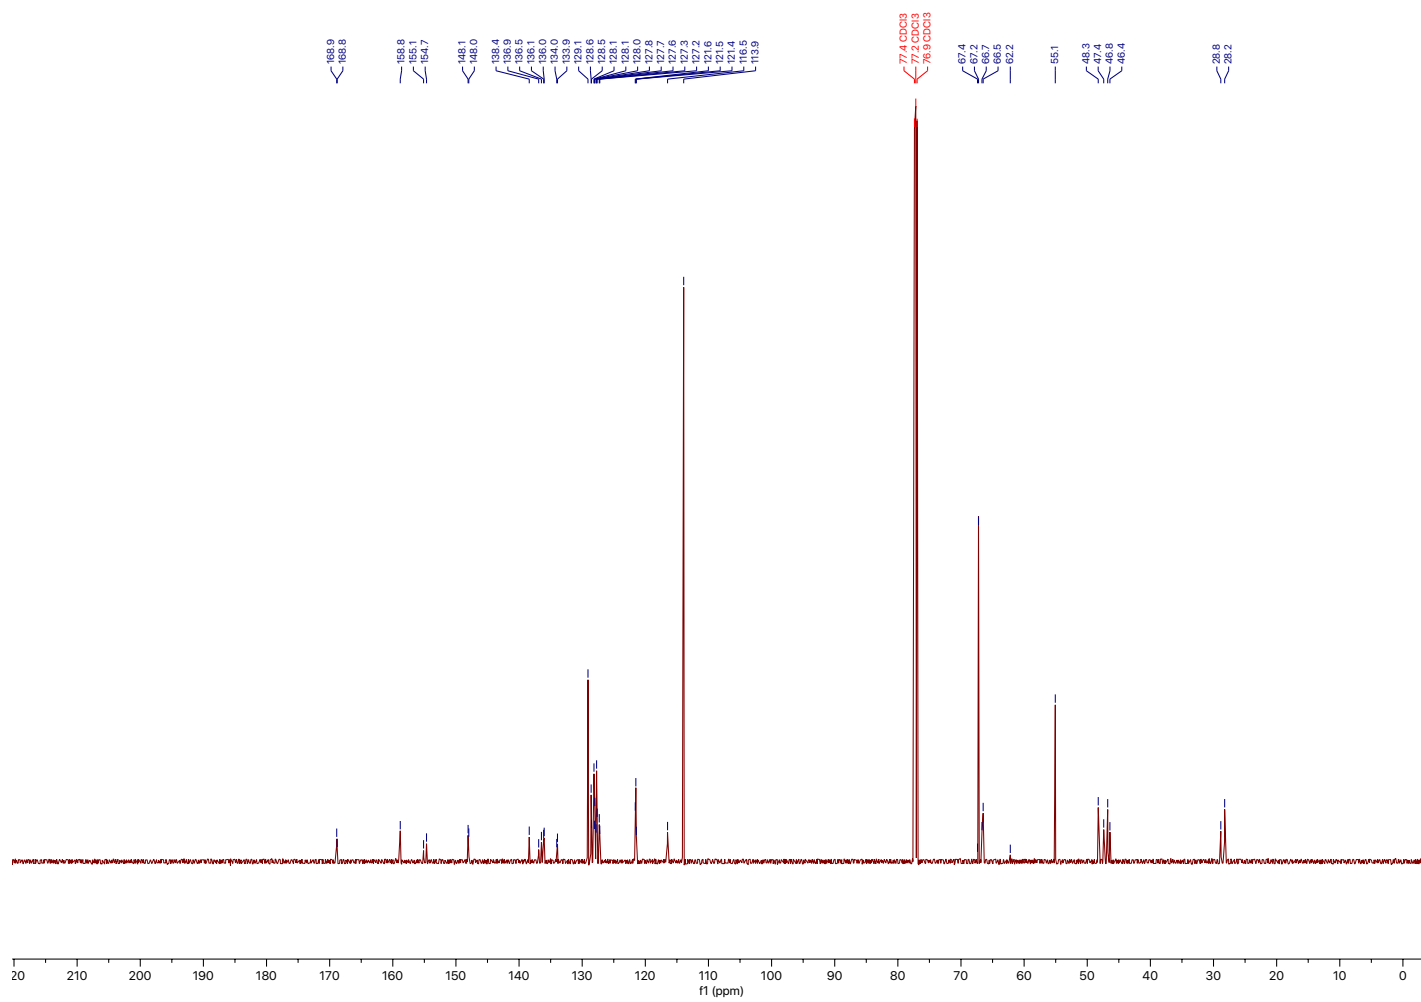

# Compound A13 <sup>1</sup>H NMR

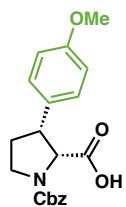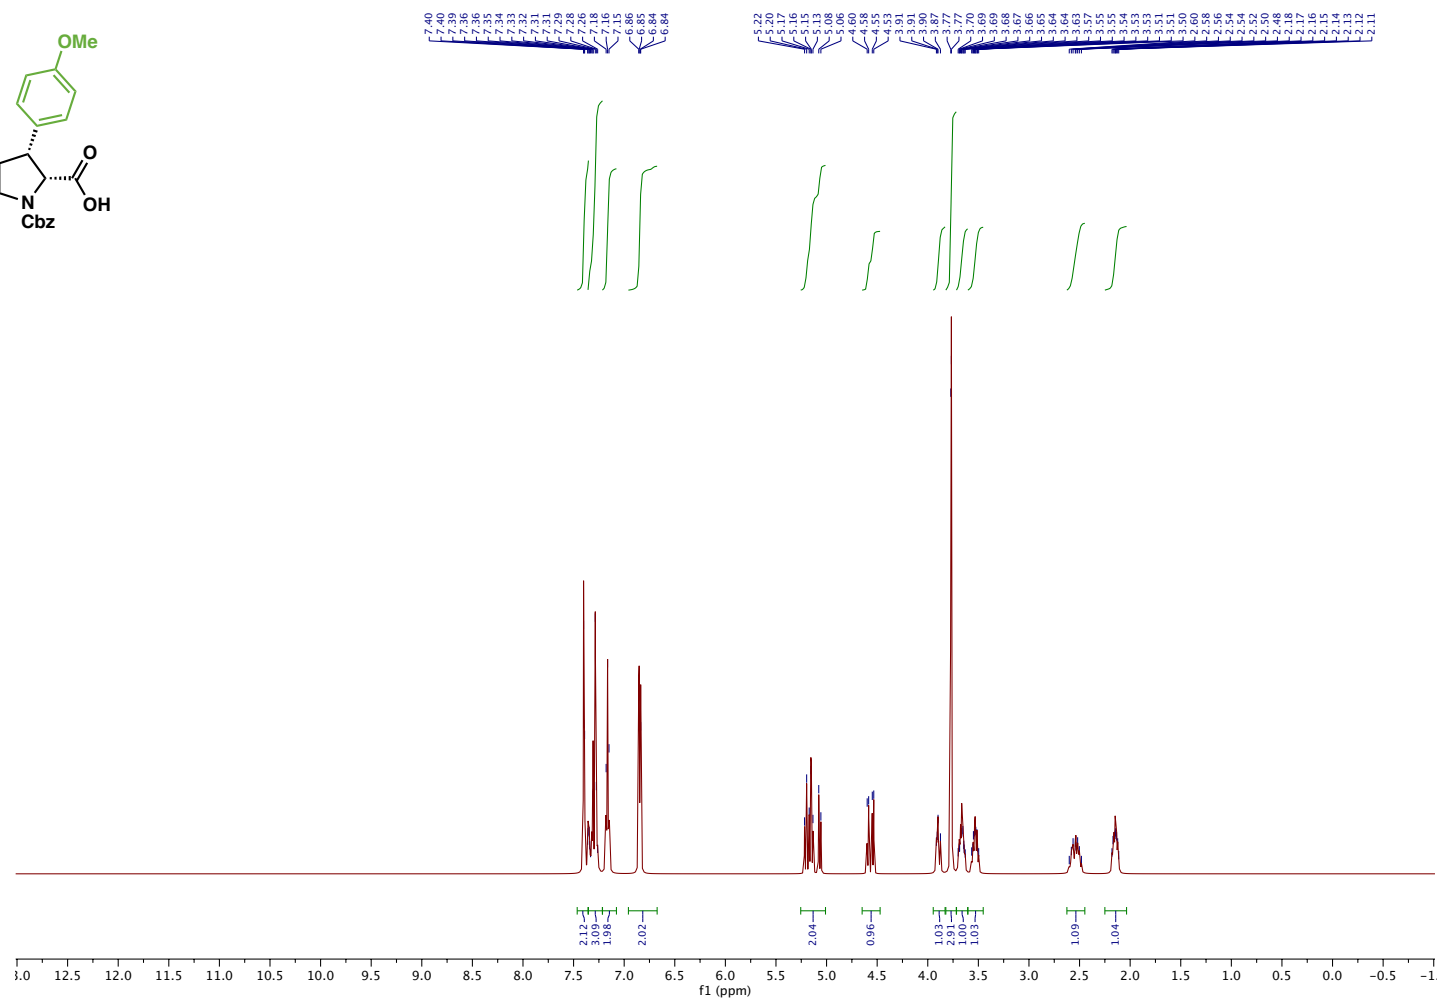

# Compound A13 <sup>13</sup>C NMR

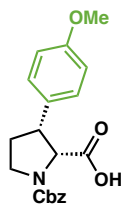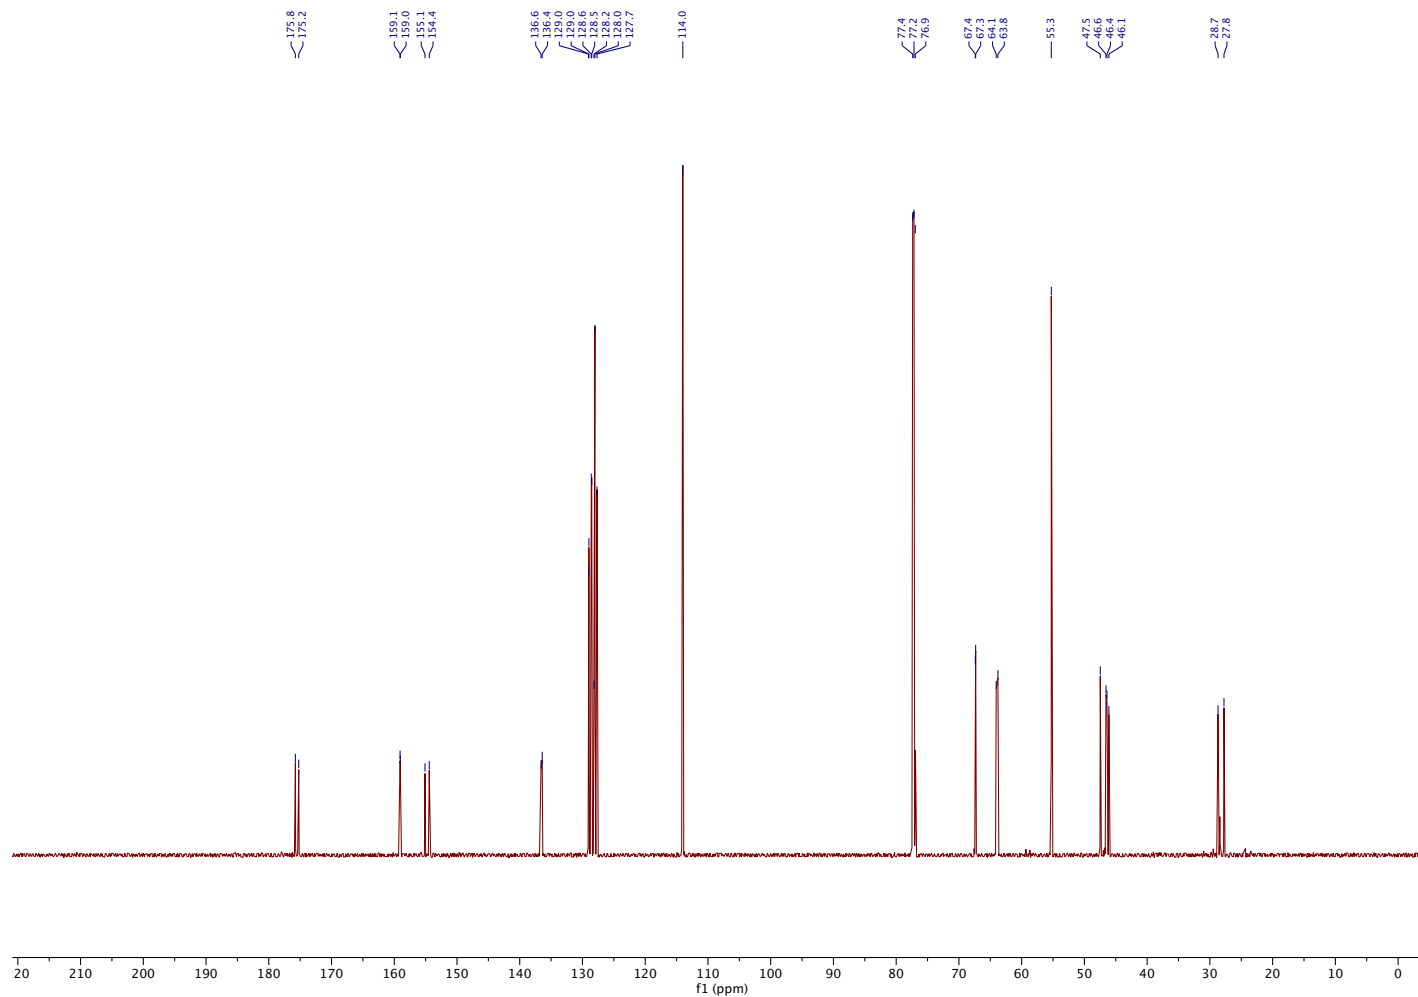

S422

# Compound 5 <sup>1</sup>H NMR

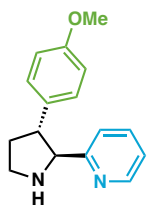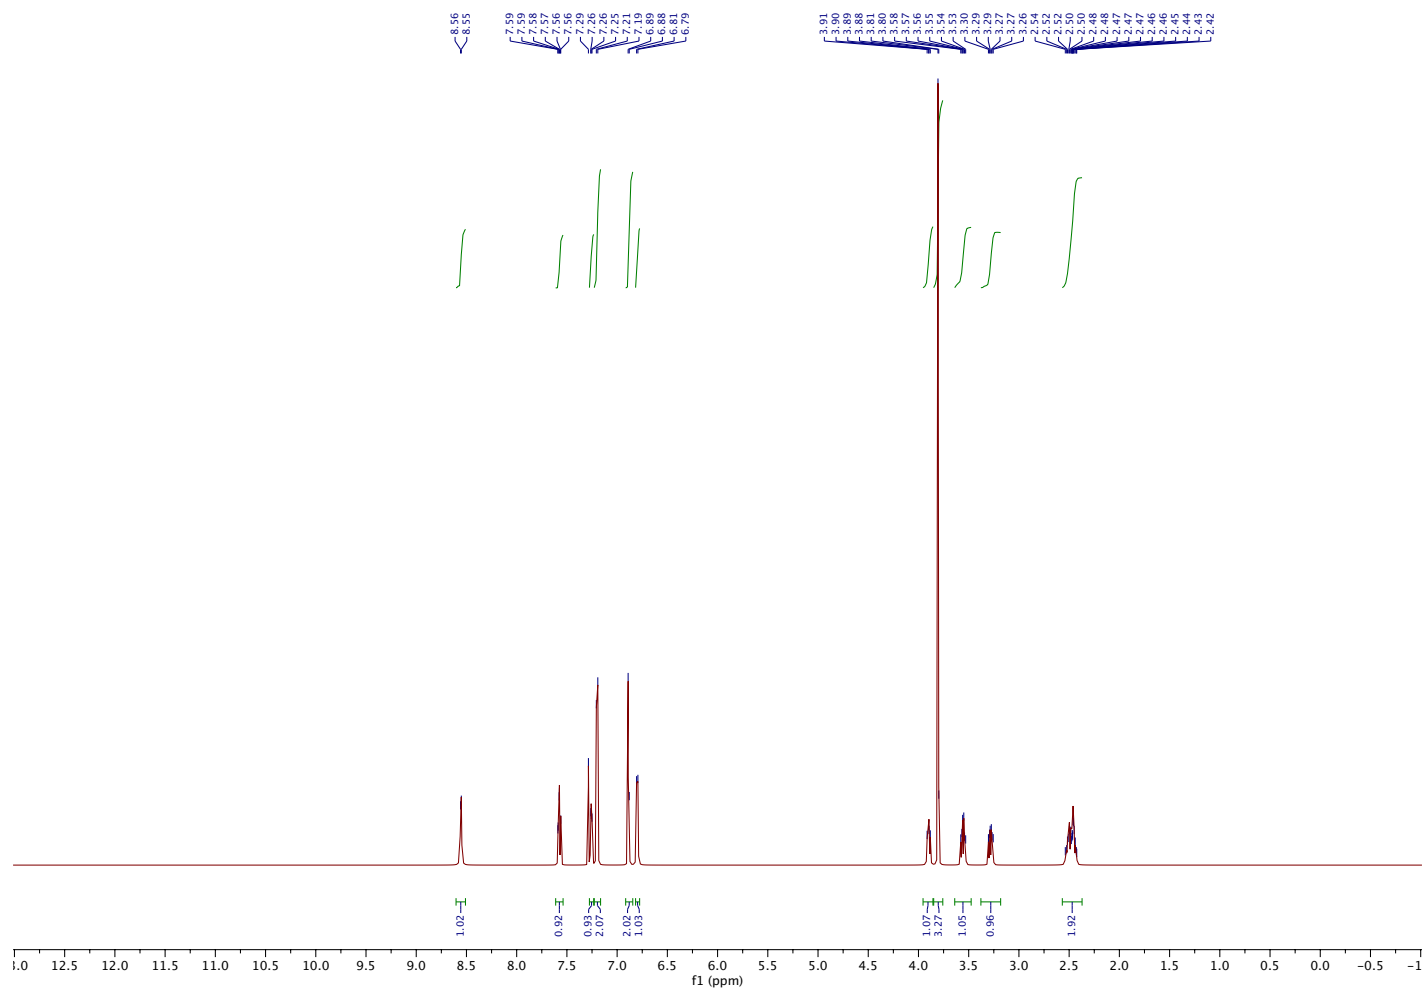

Compound SI-44 – <sup>1</sup>HNMR

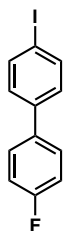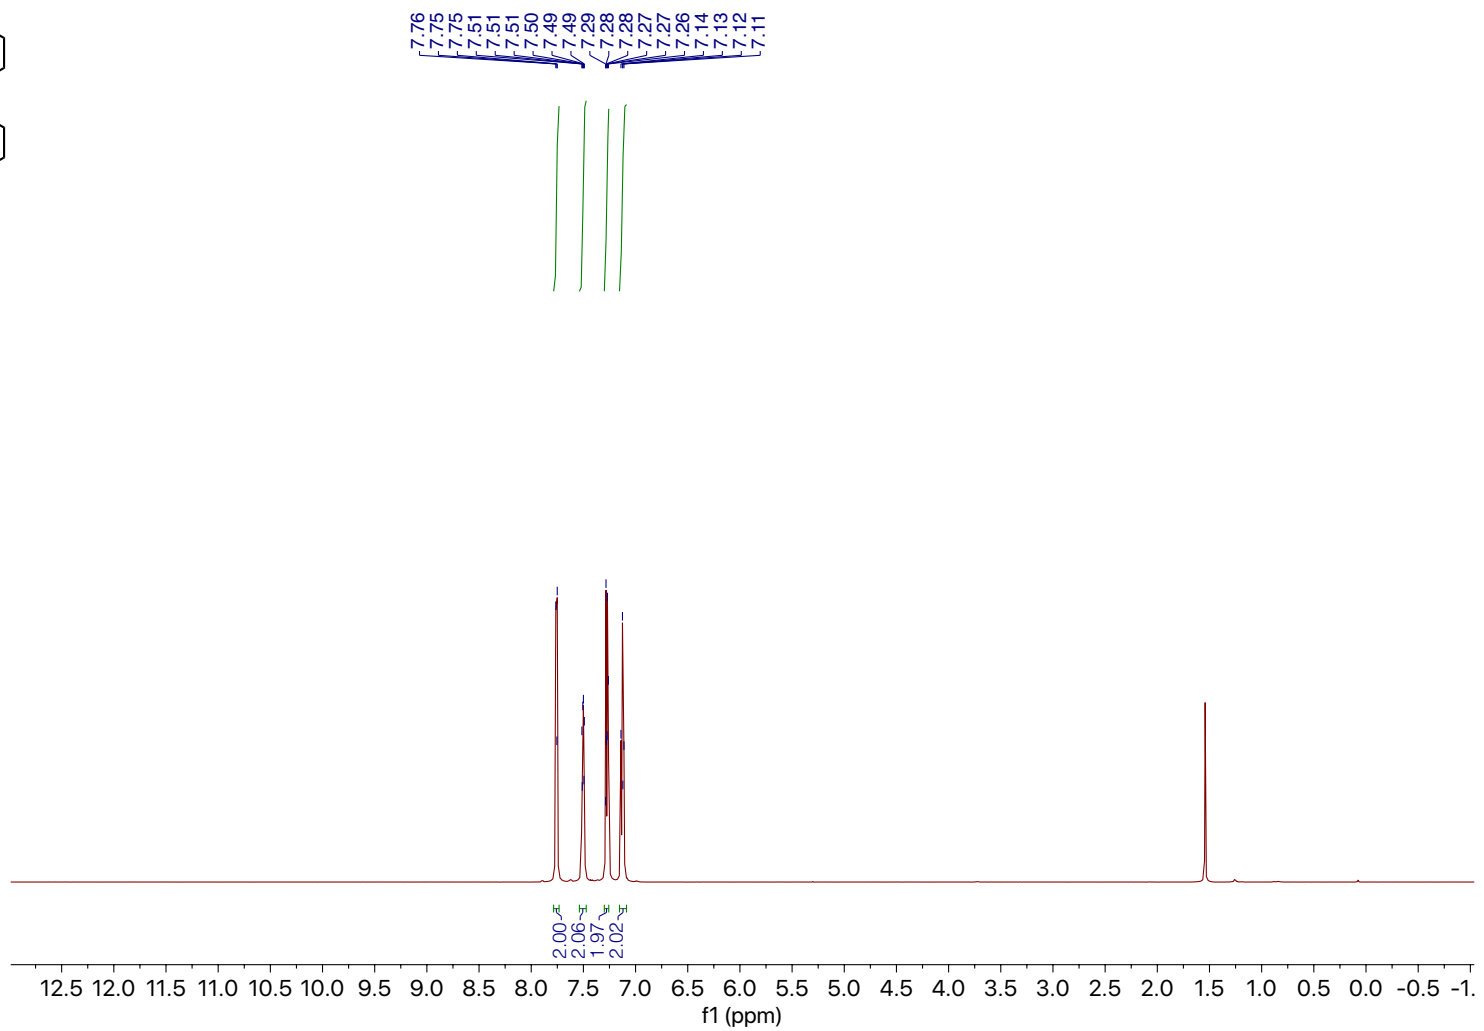



Compound SI-44 <sup>19</sup>F NMR

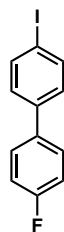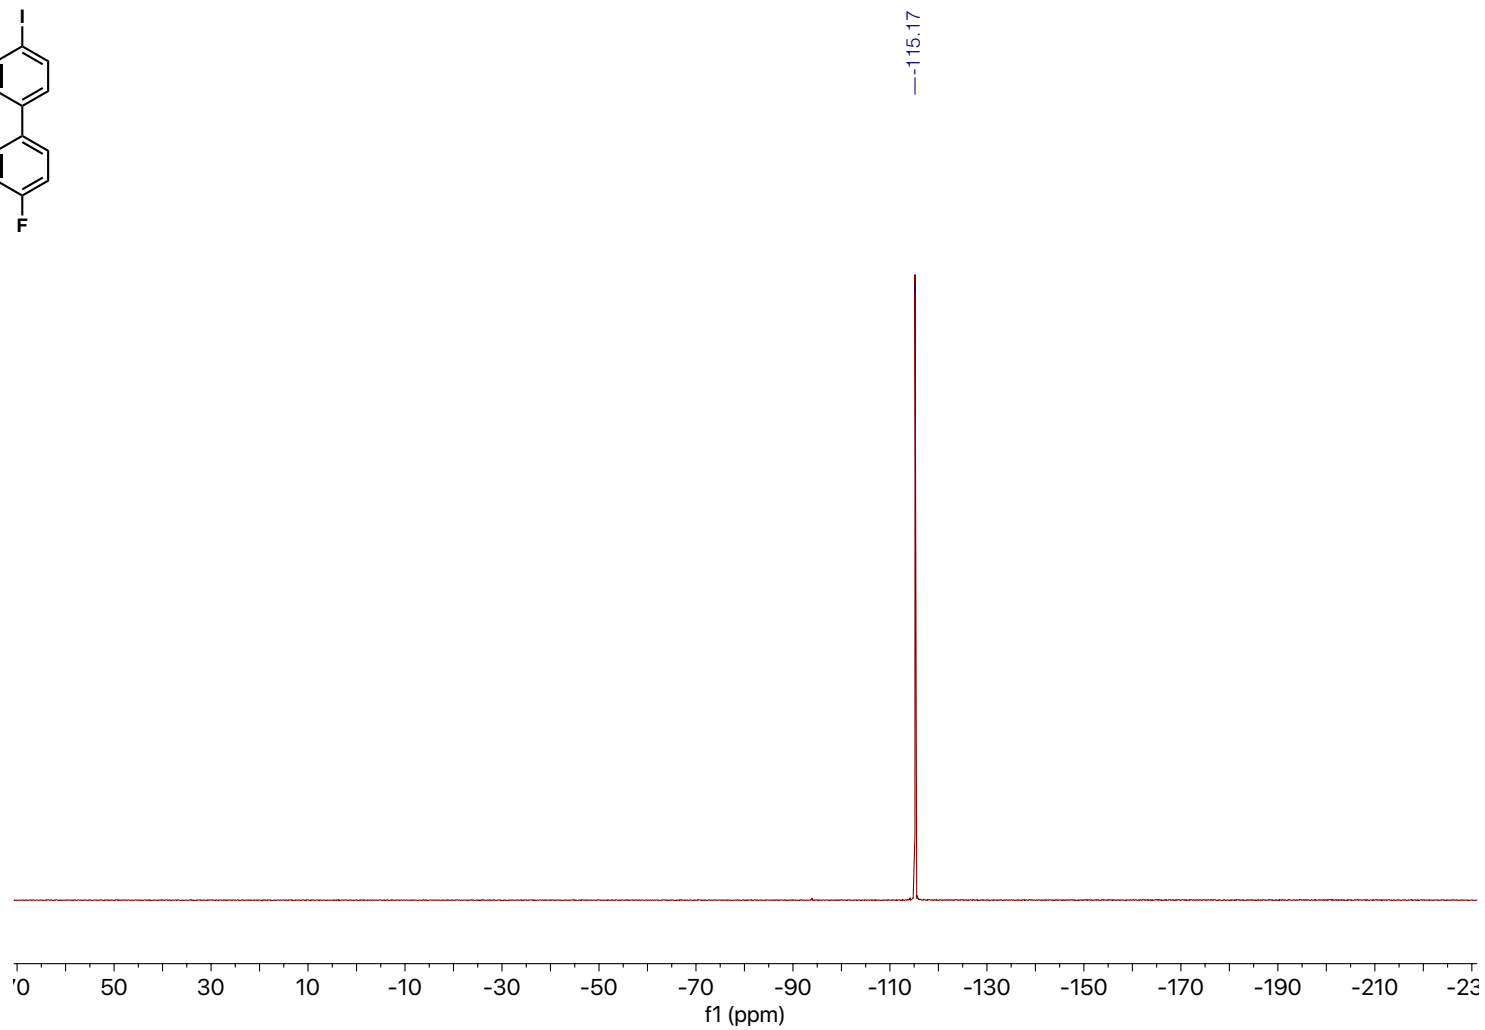

Compound SI-44 –  $^{13}\text{C}$  NMR

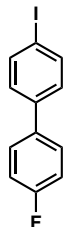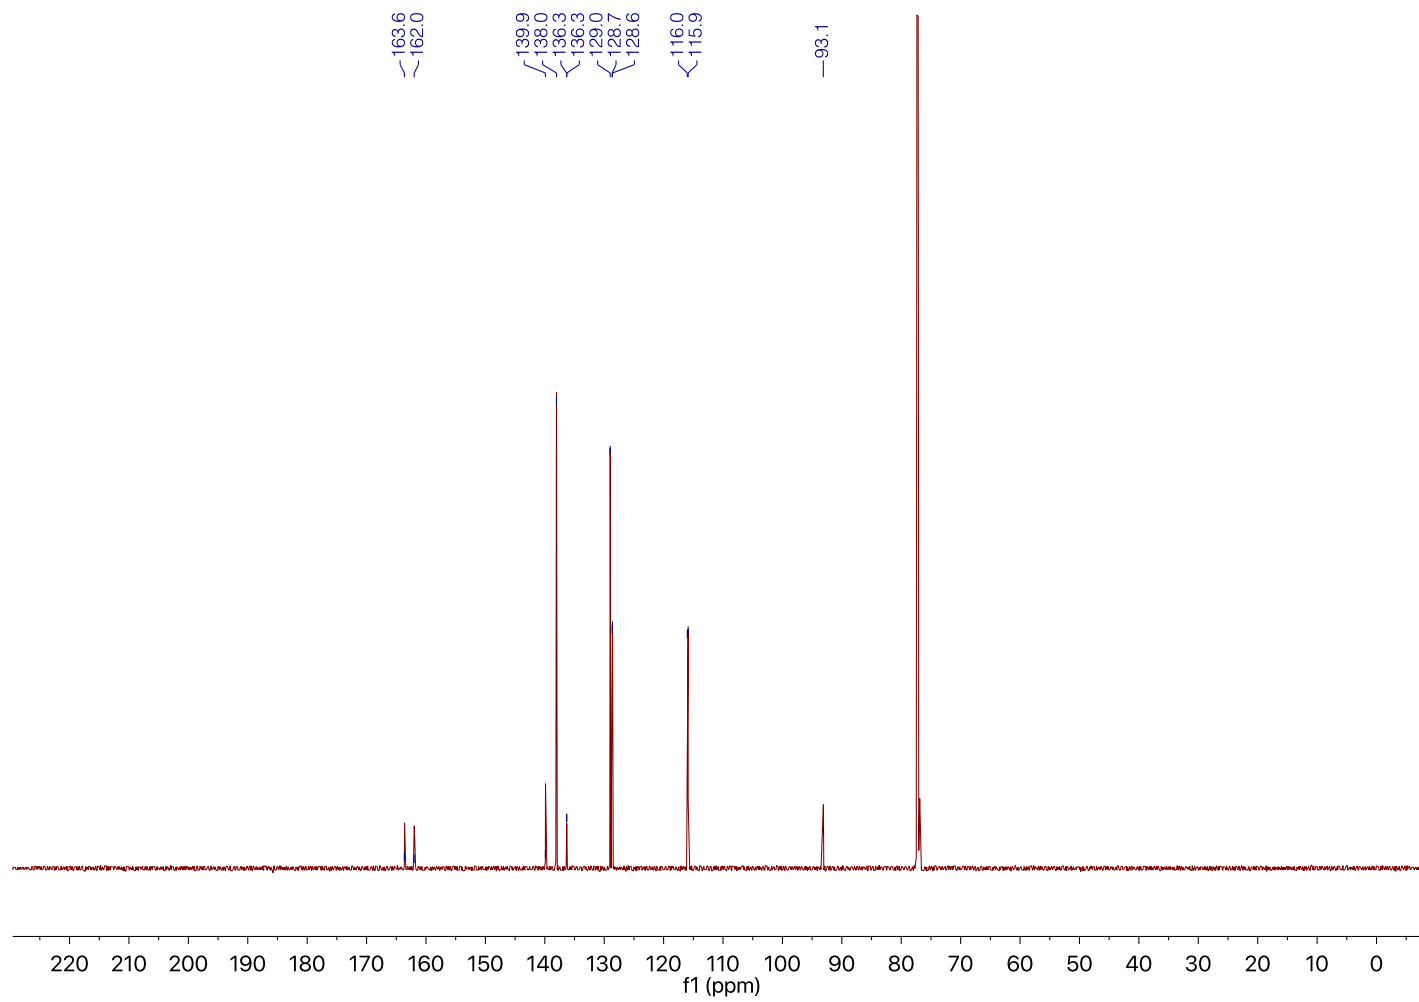

Compound 74 – <sup>1</sup>H NMR

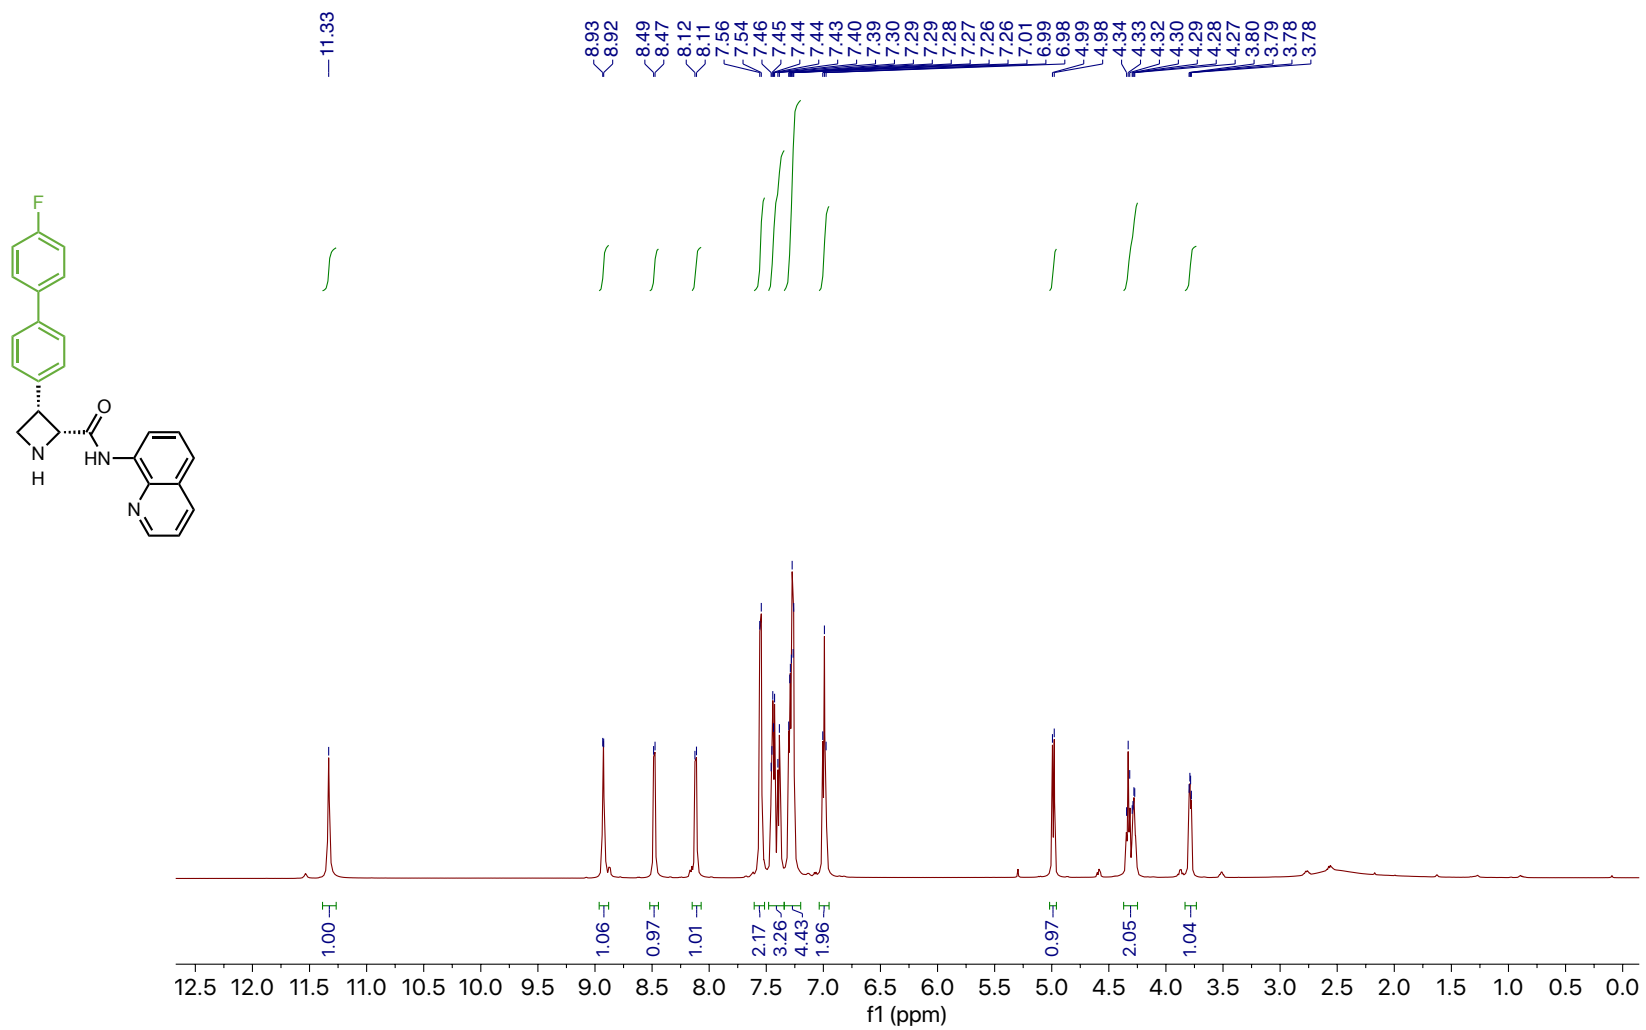

Compound 74 –  $^{19}\text{F}$  NMR

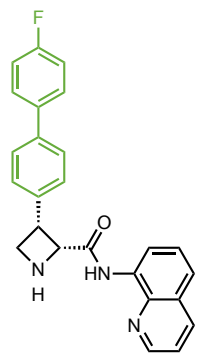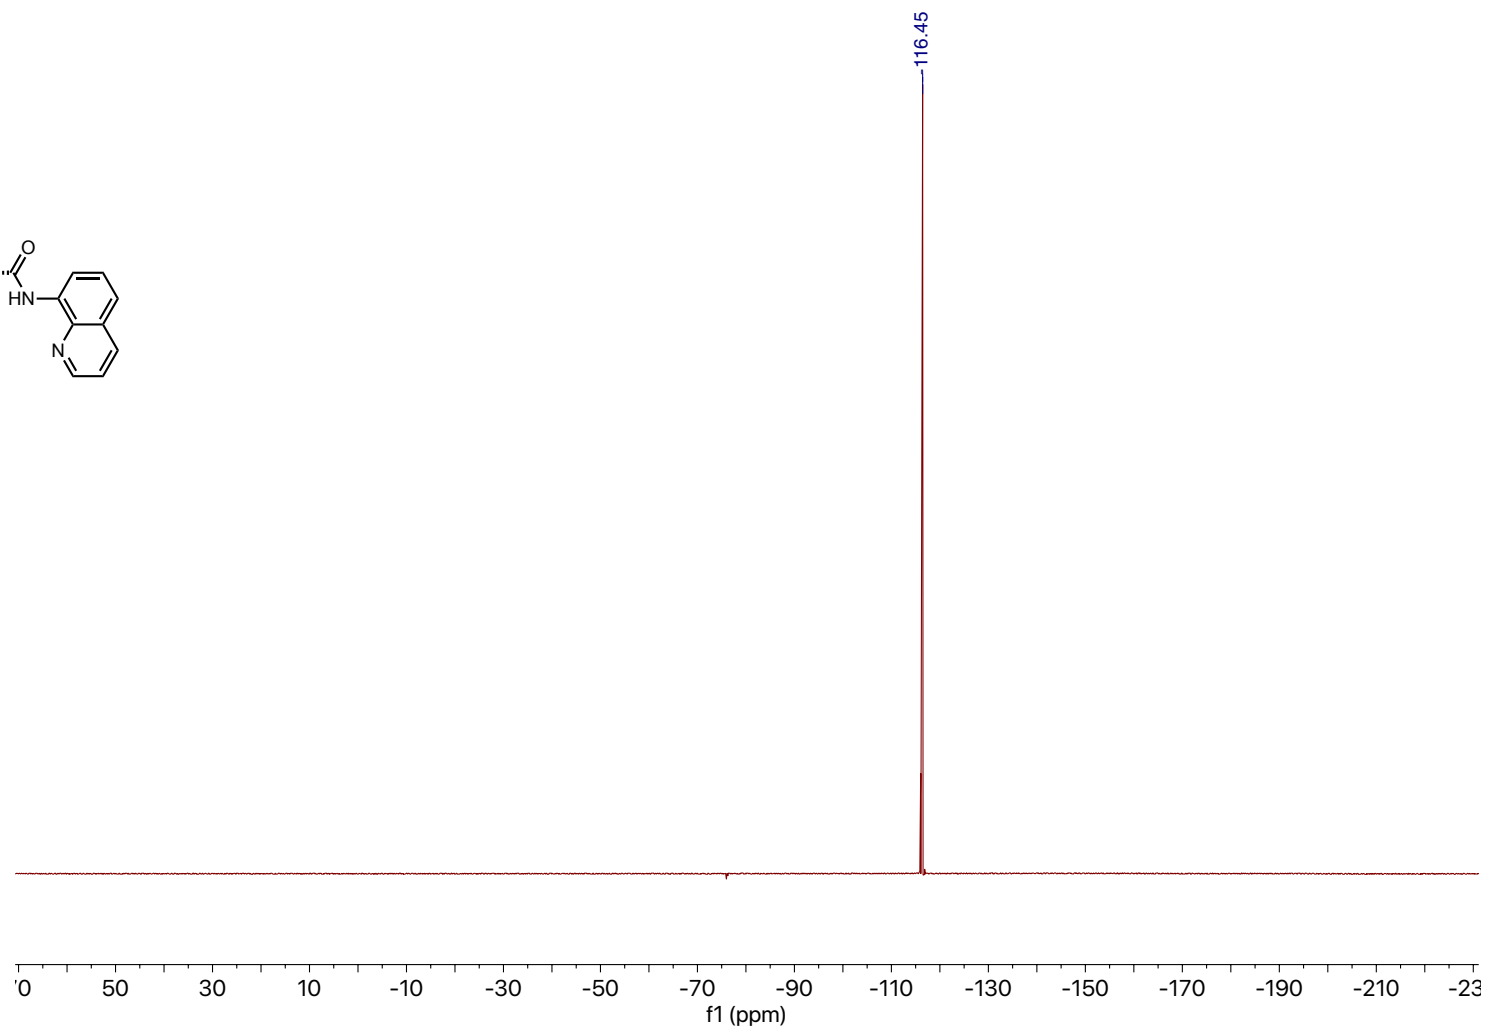

# Compound 74 <sup>13</sup>C NMR

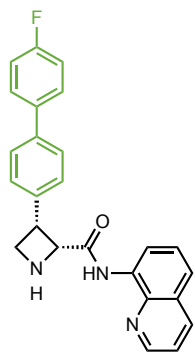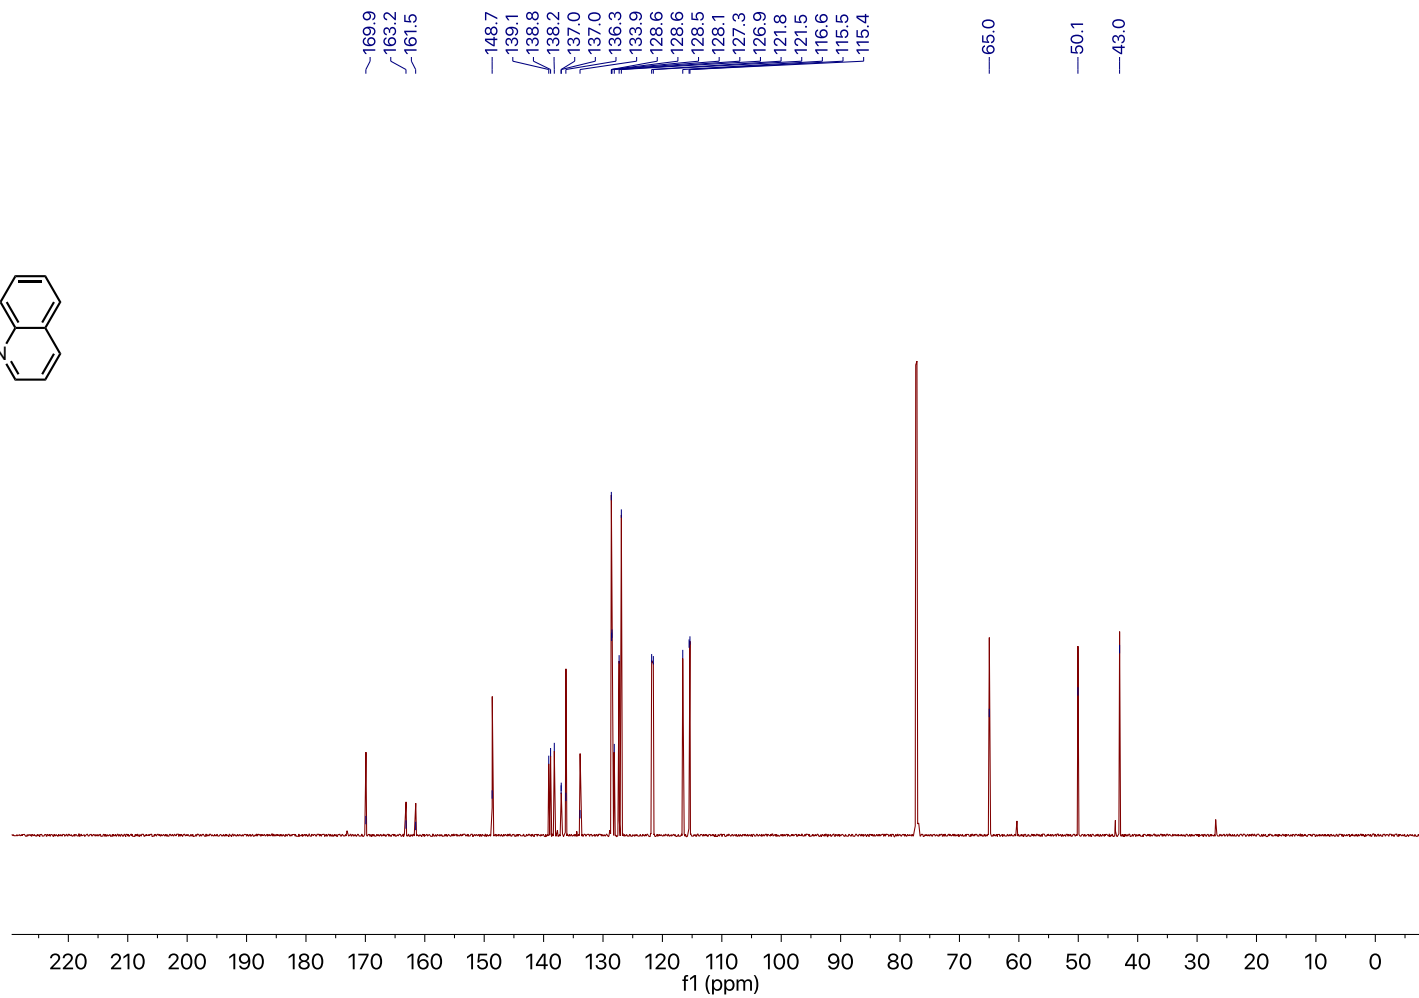

Compound SI-45- <sup>1</sup>H NMR

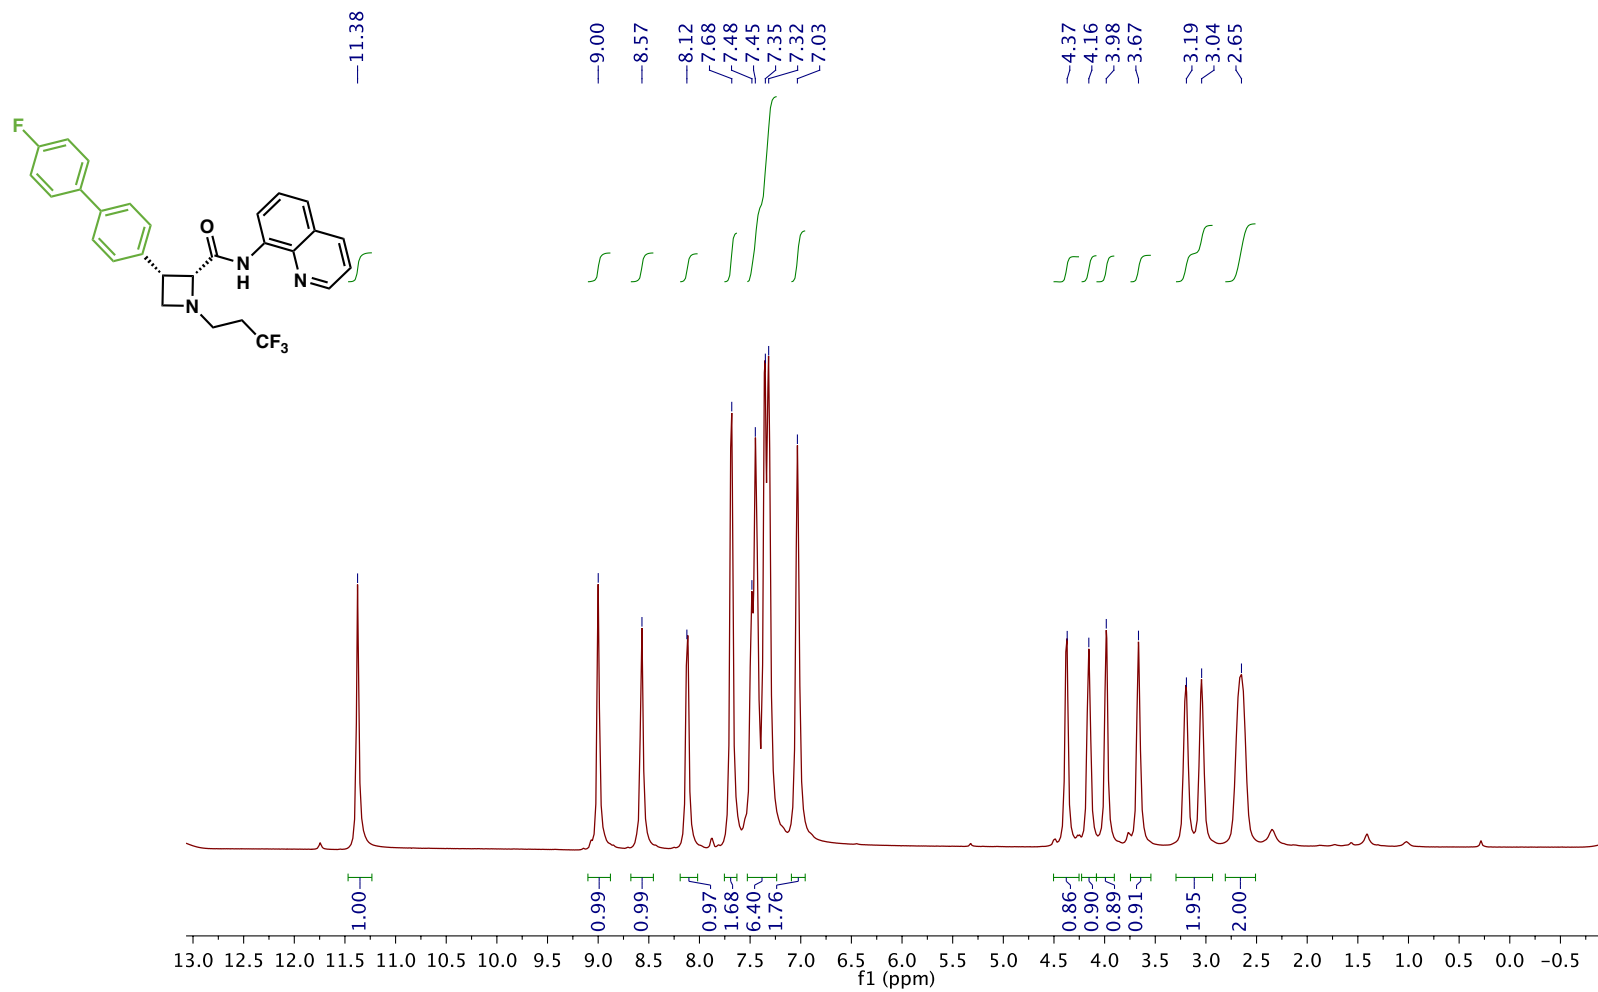

Compound SI-45 –  $^{19}\text{F}$  NMR

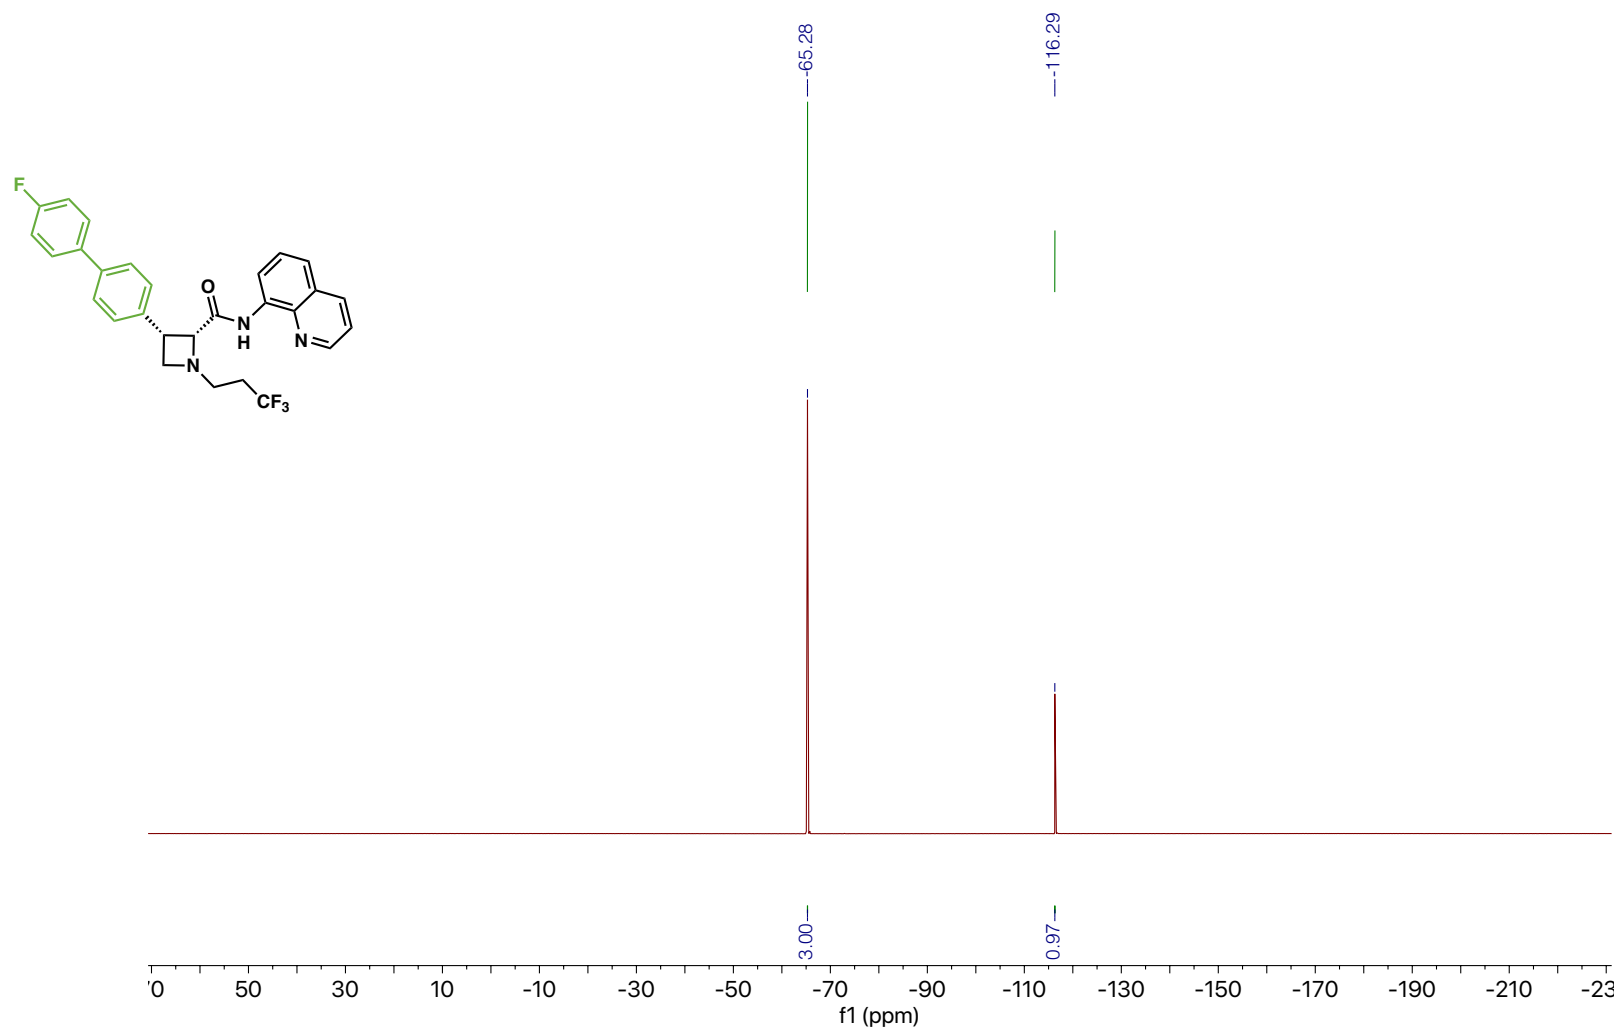

Compound SI-45 - <sup>13</sup>C NMR

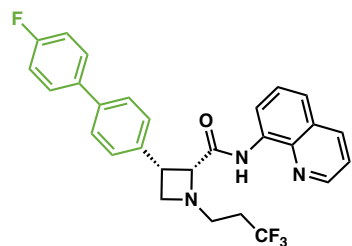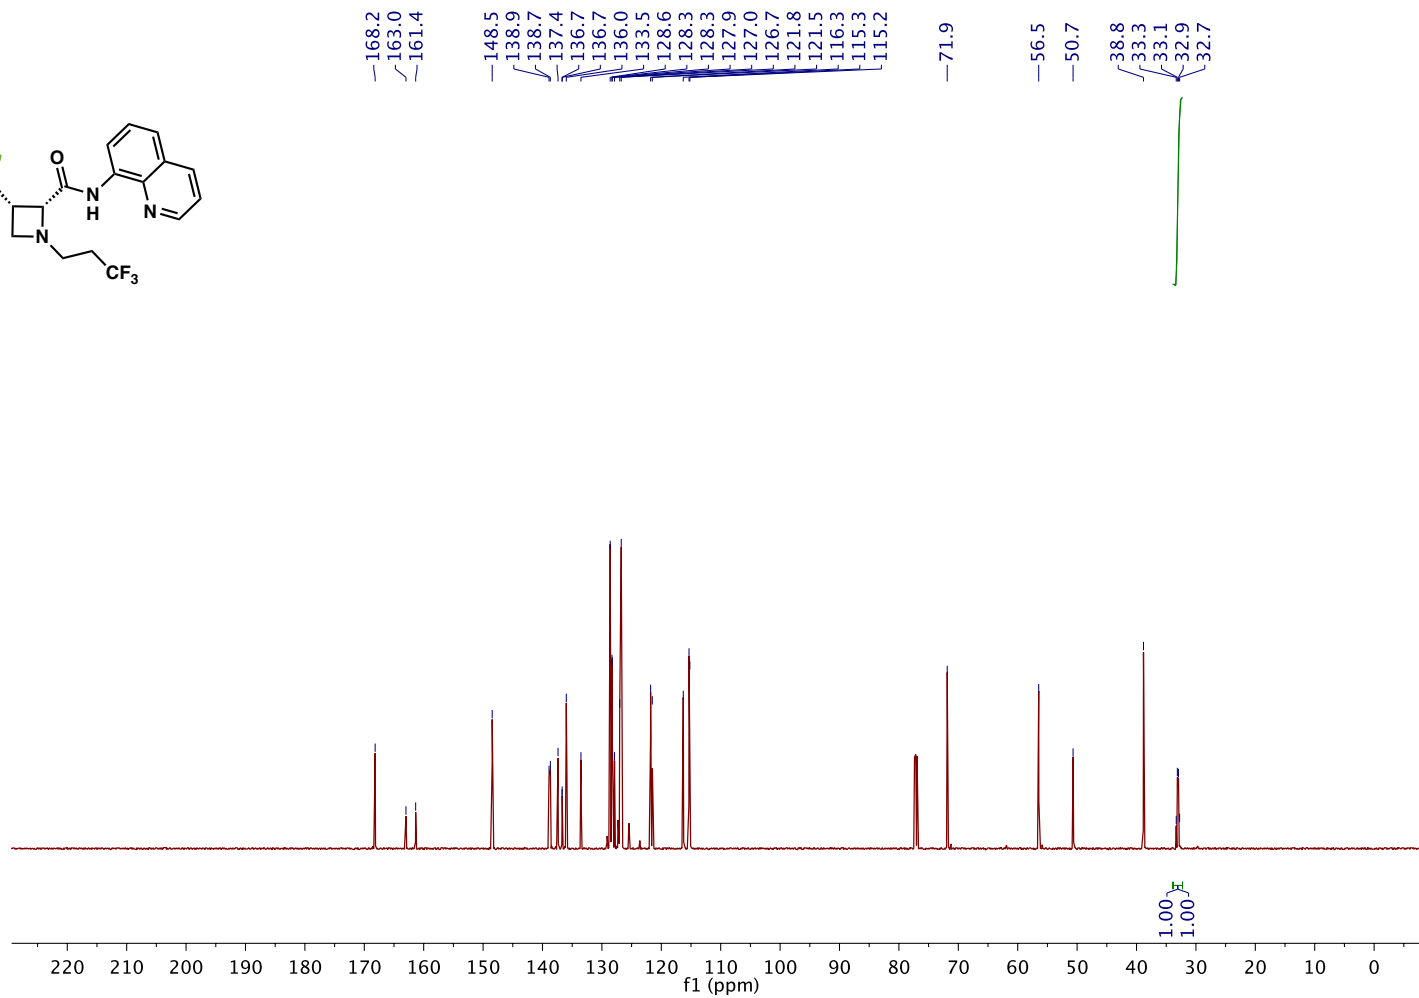



Compound A15 – <sup>1</sup>H NMR

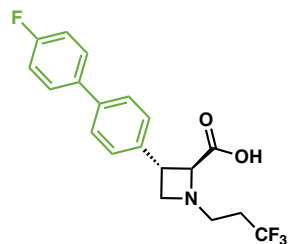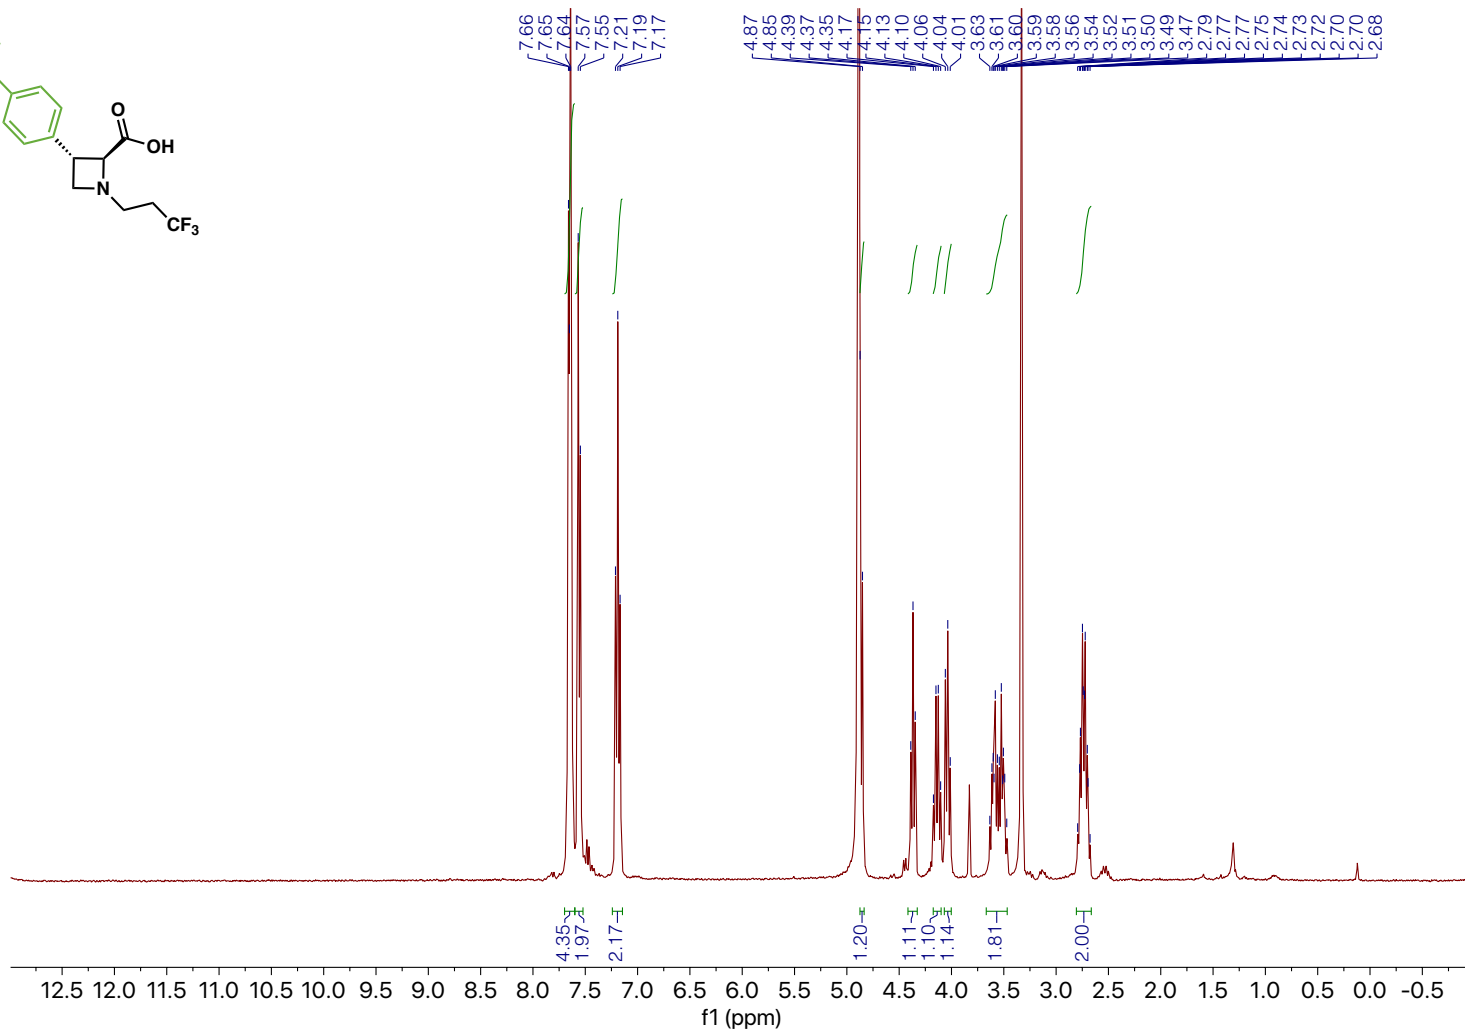

Compound A15 – <sup>19</sup>F NMR

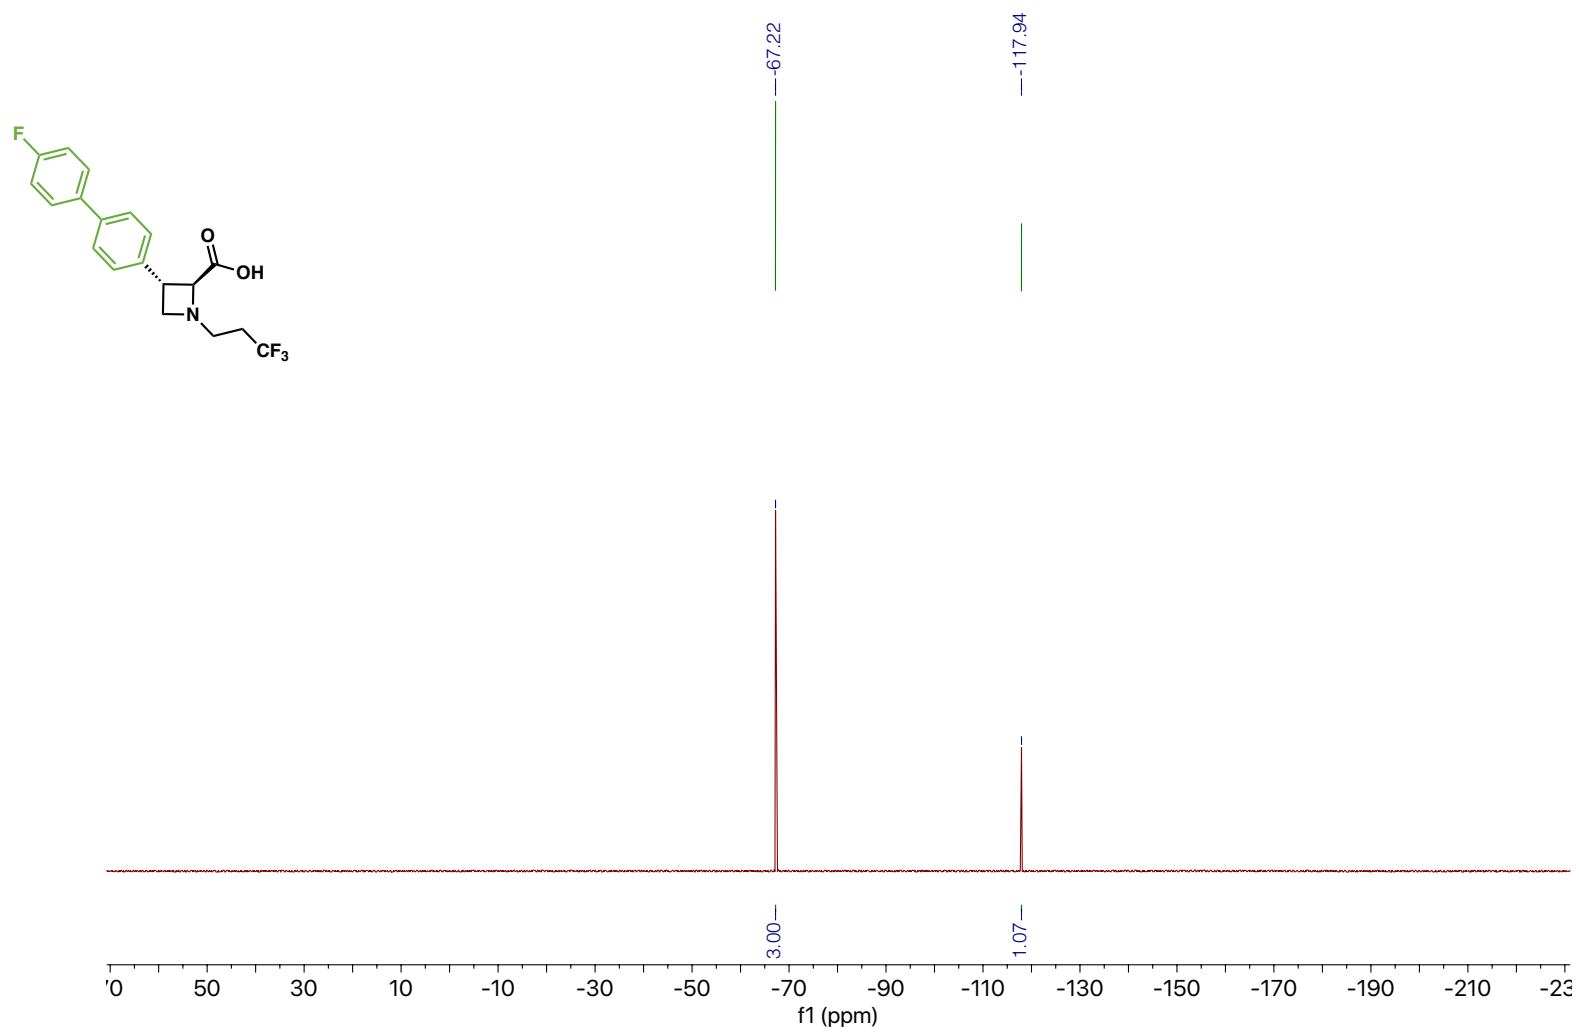

Compound A15- <sup>13</sup>C NMR

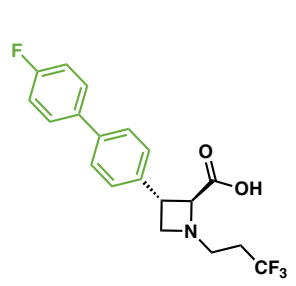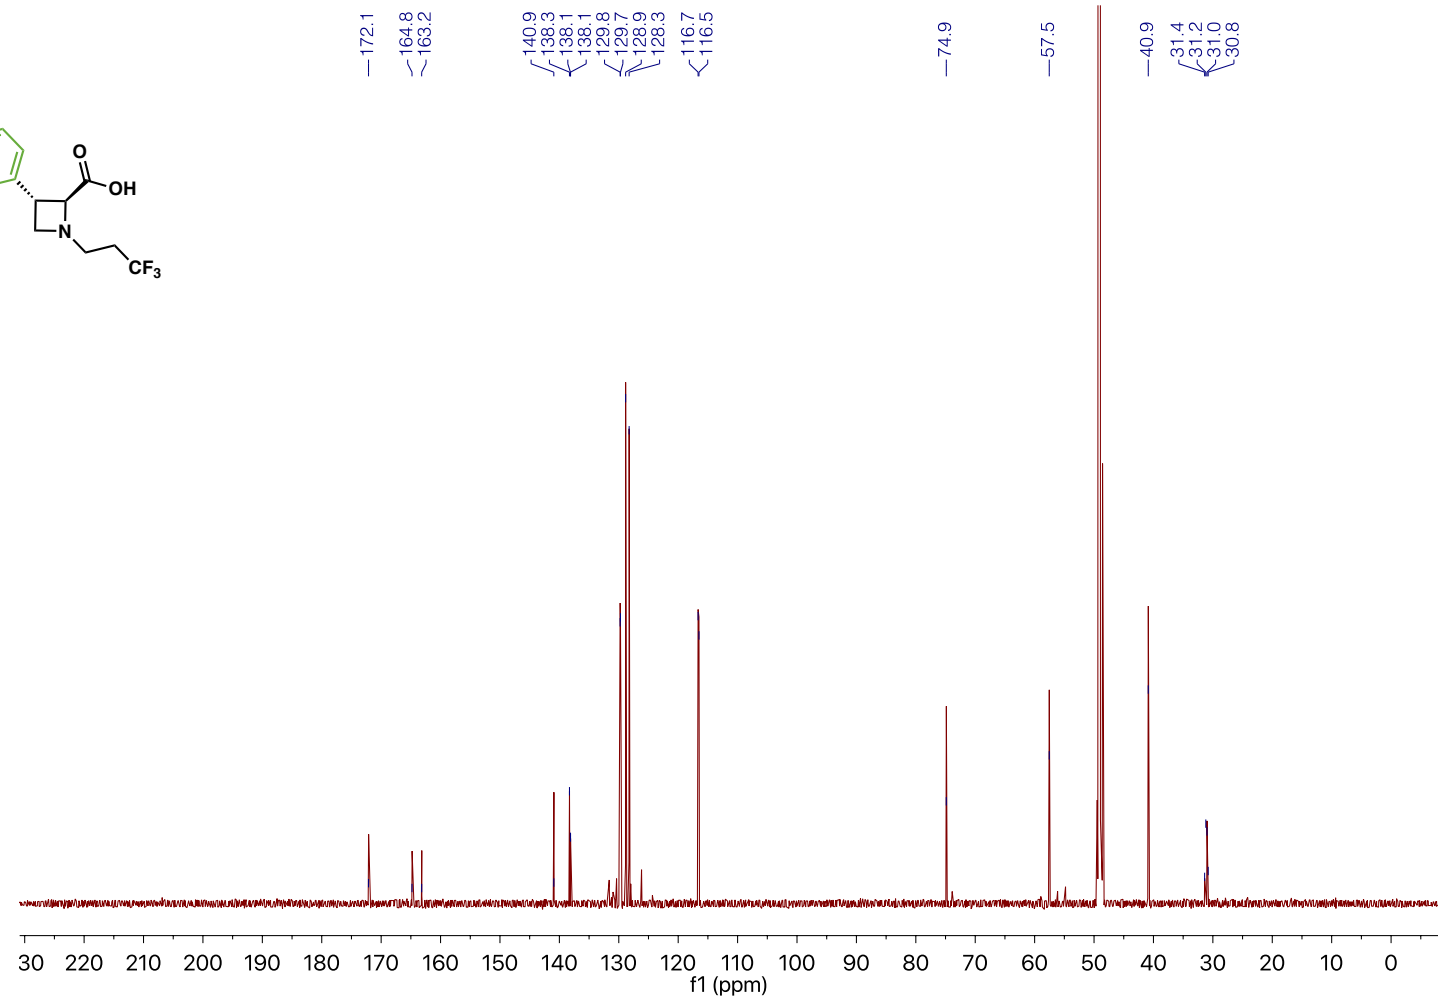

Compound A16 – <sup>1</sup>H NMR

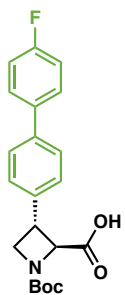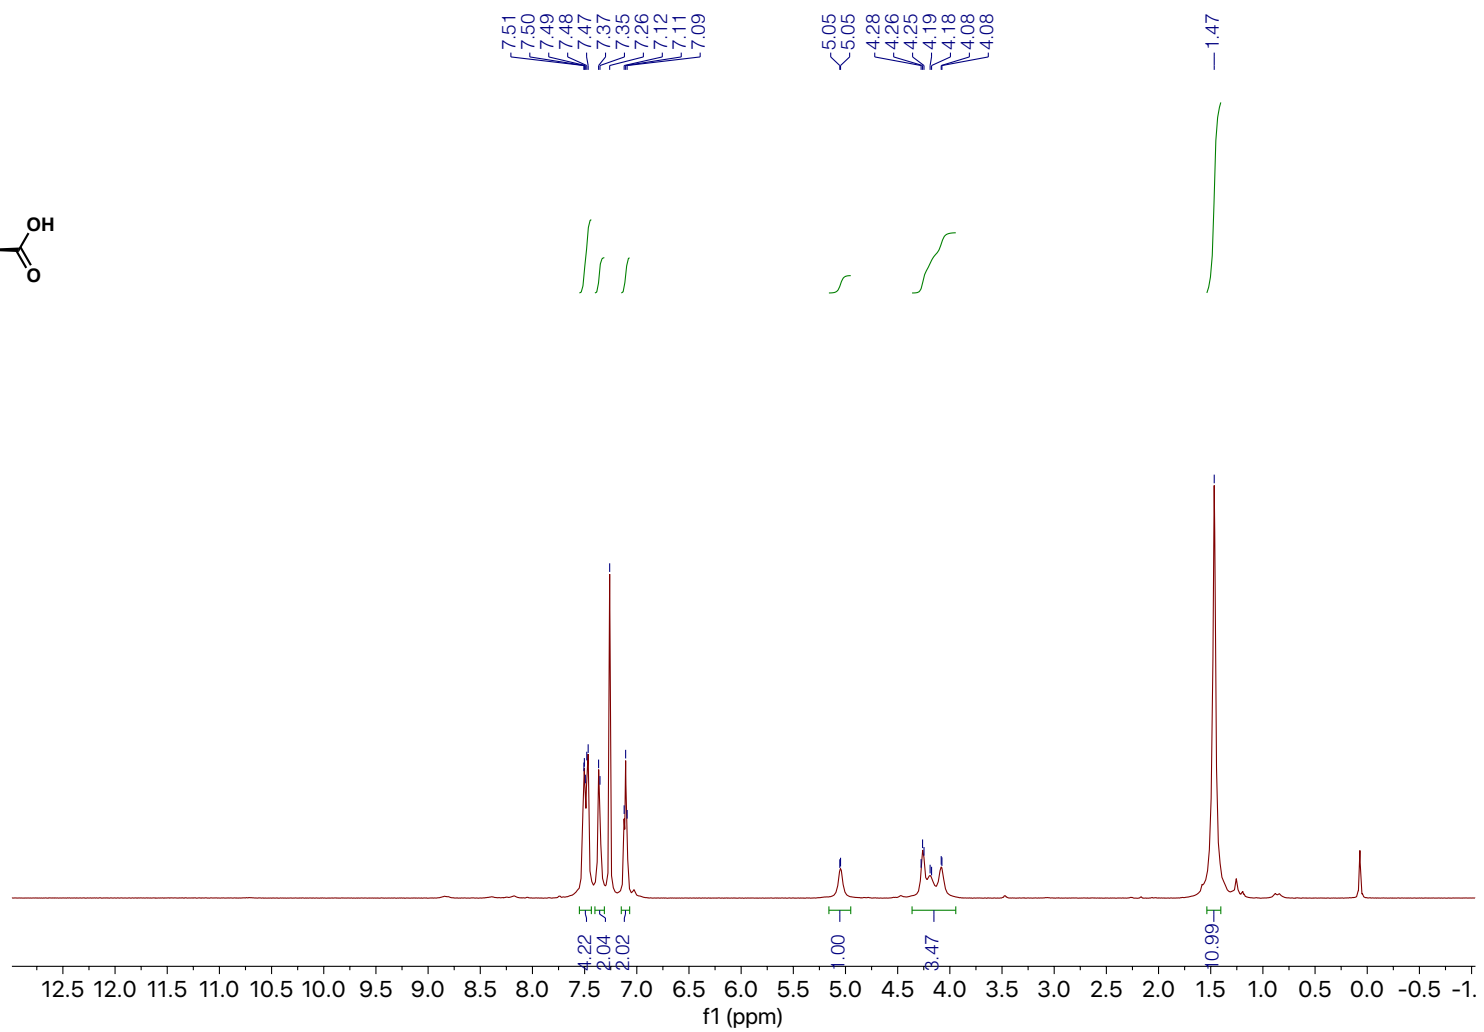

Compound A16 –  $^{19}\text{F}$  NMR

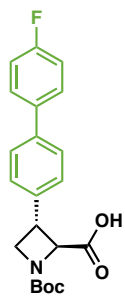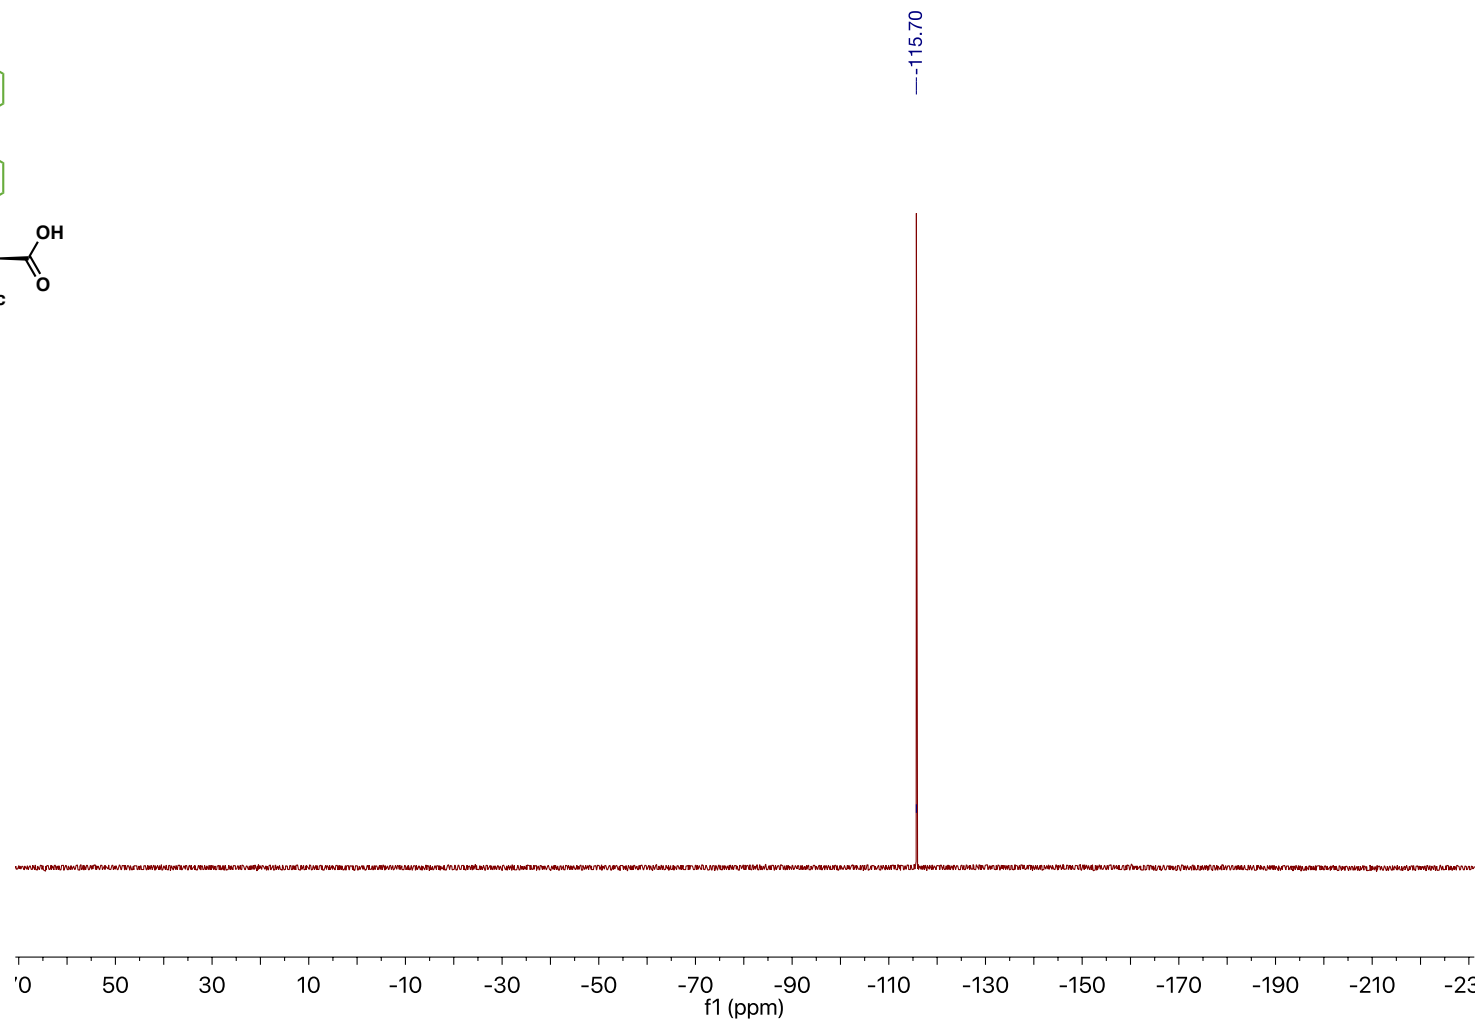

Compound A16 –<sup>13</sup>C NMR

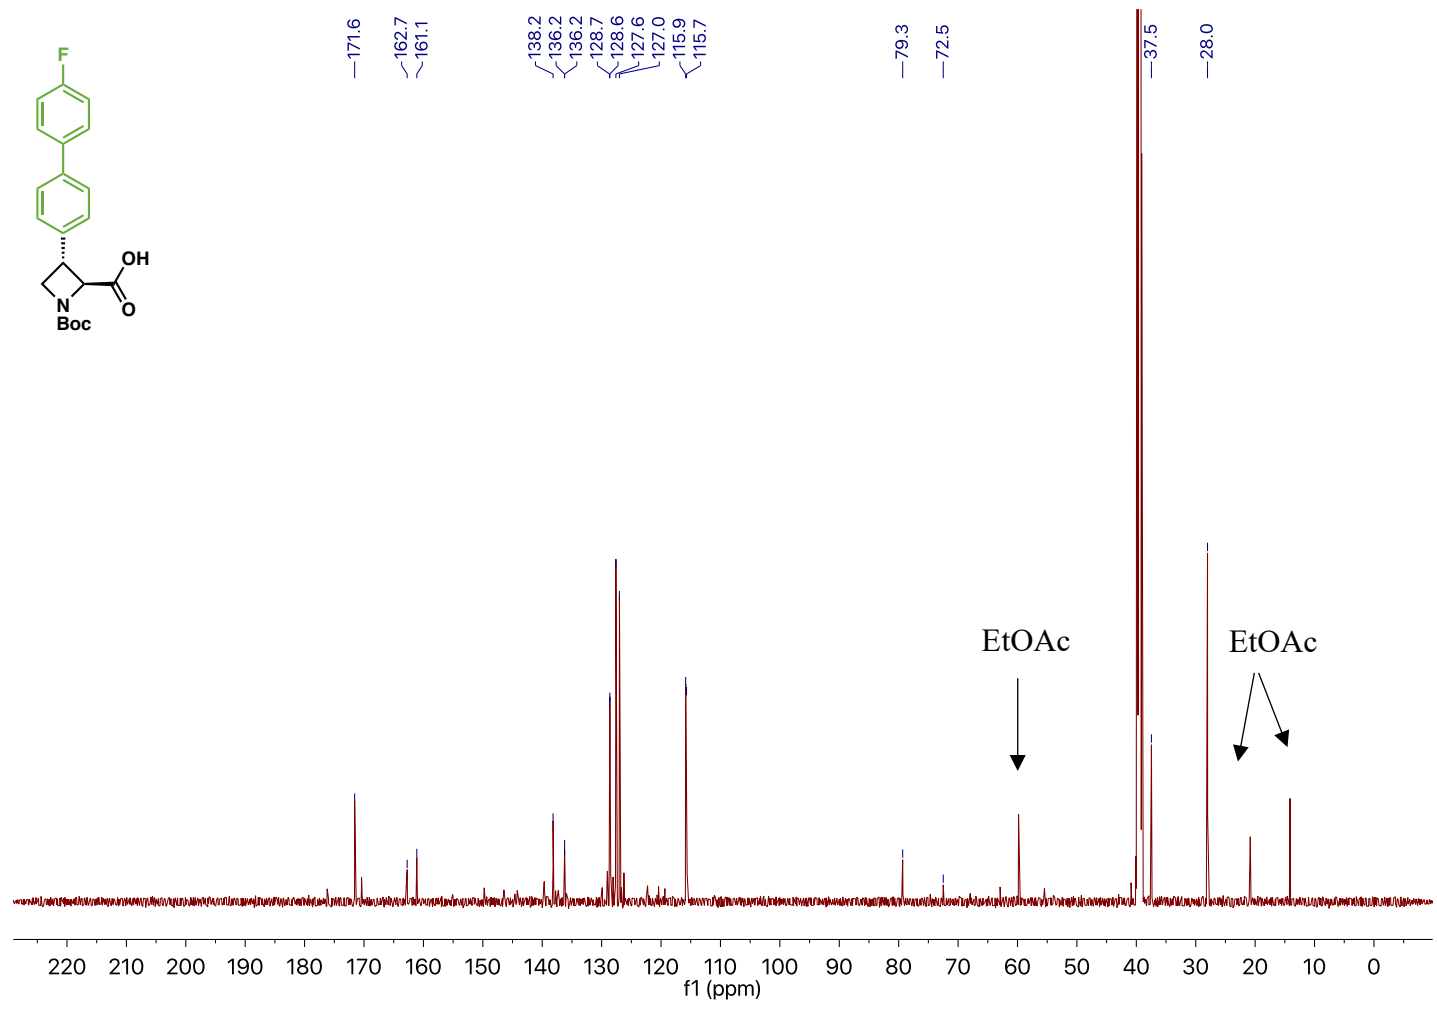

Compound B9 – <sup>1</sup>H NMR

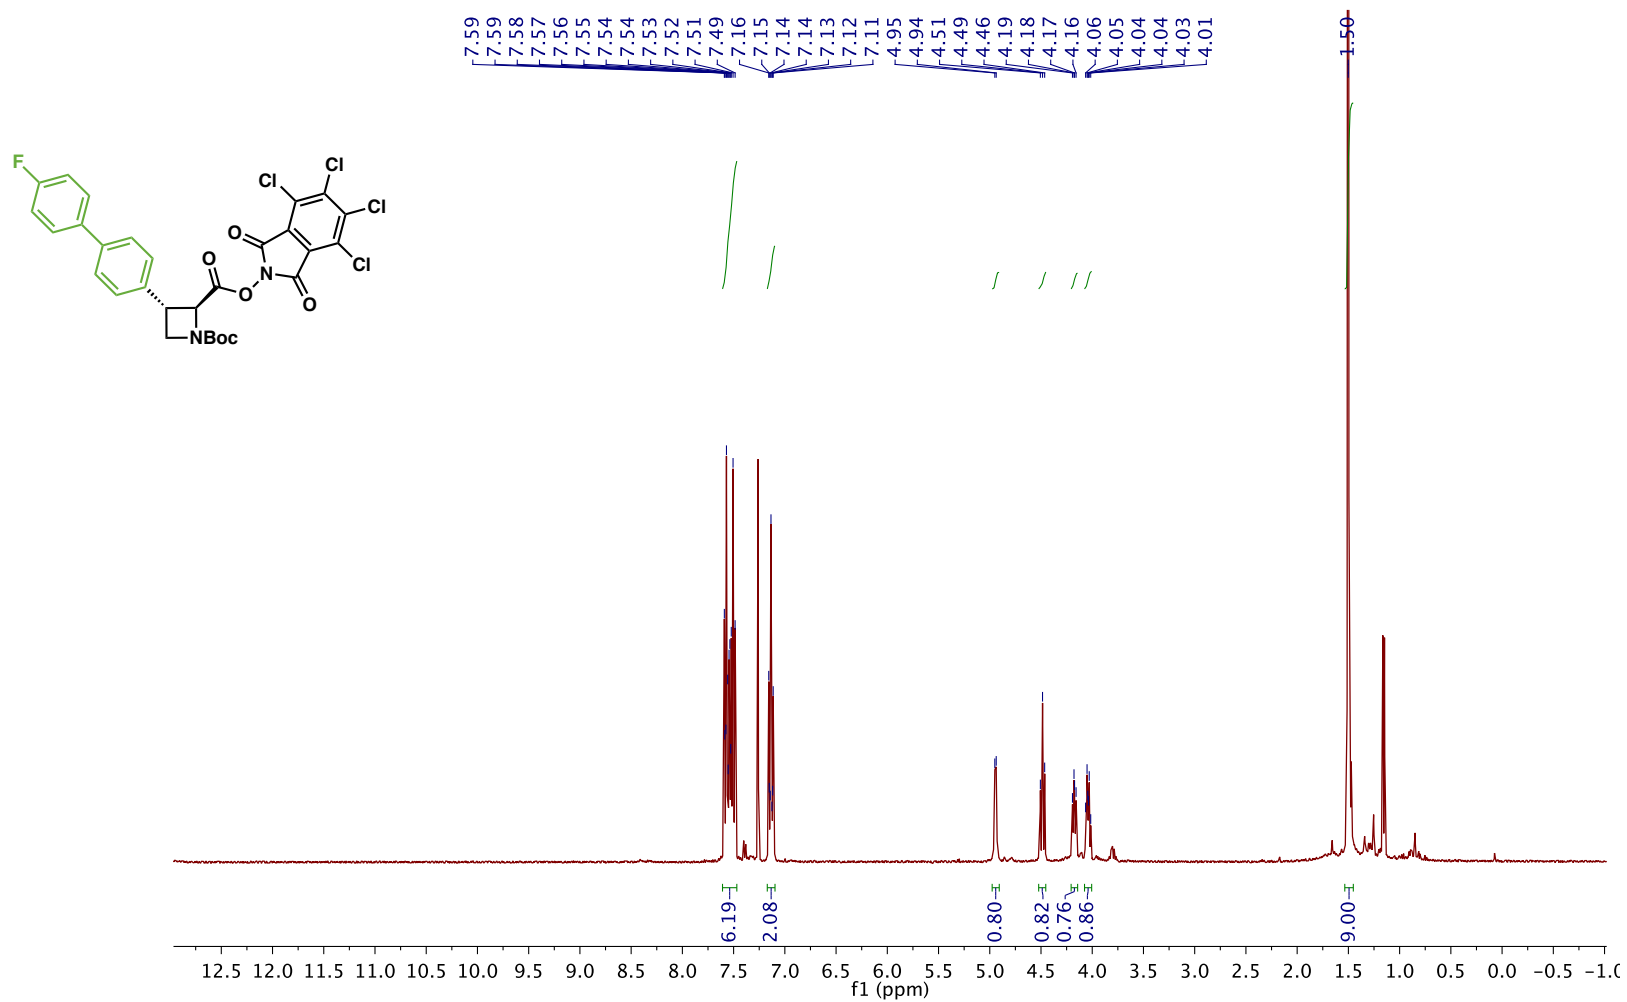

Compound B9 –  $^{19}\text{F}$  NMR

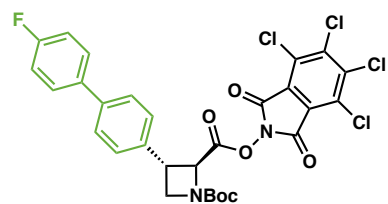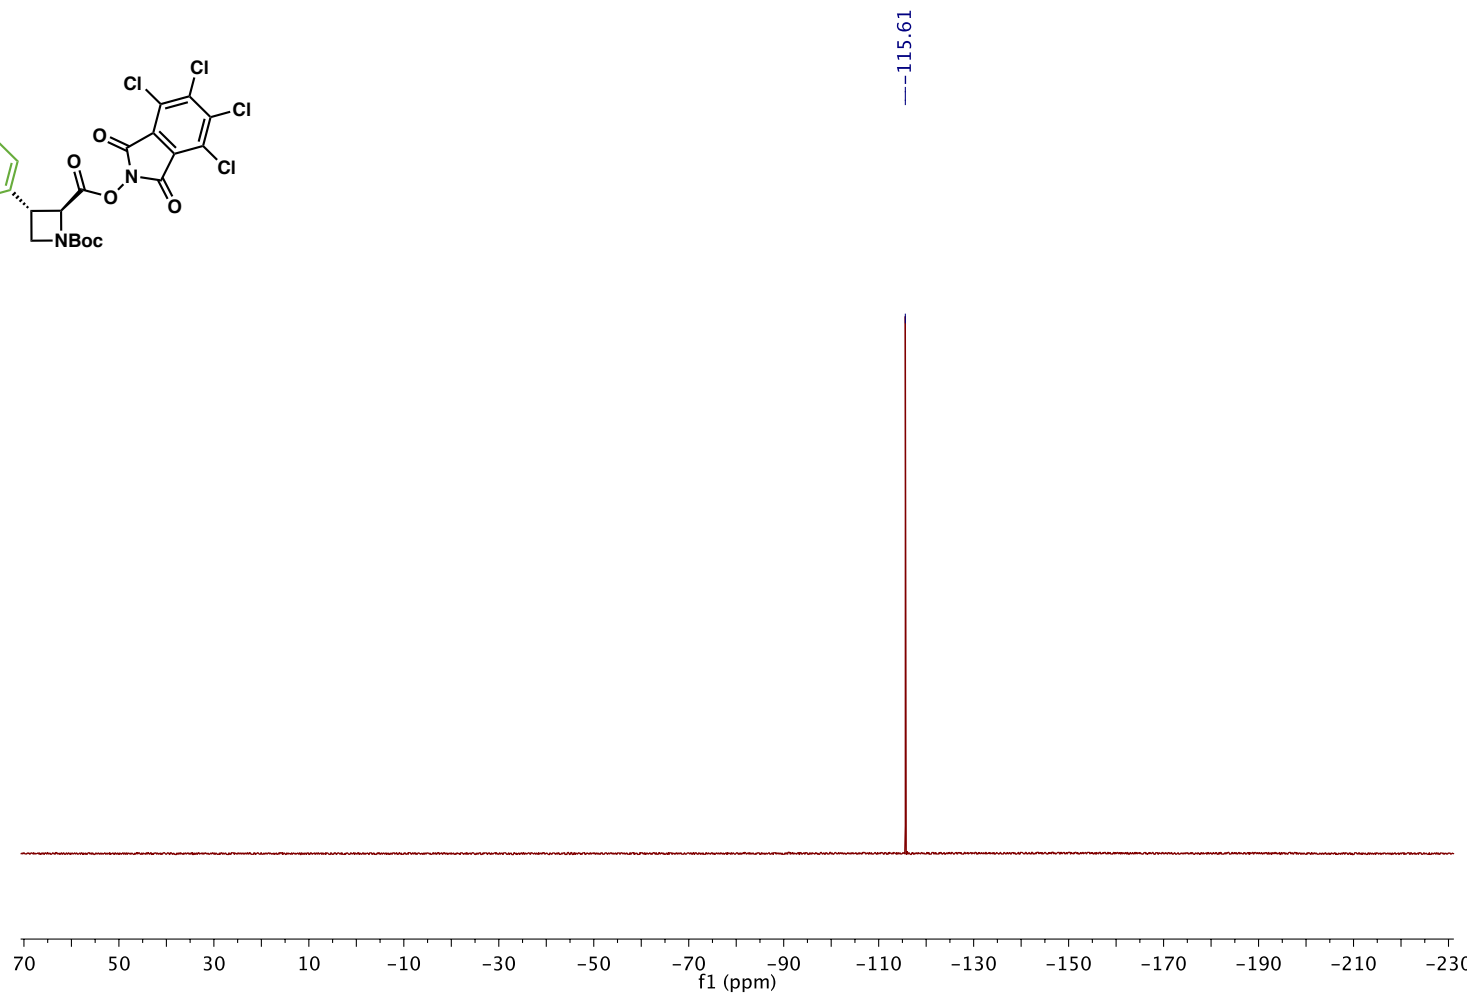



Compound B9 - <sup>13</sup>C NMR

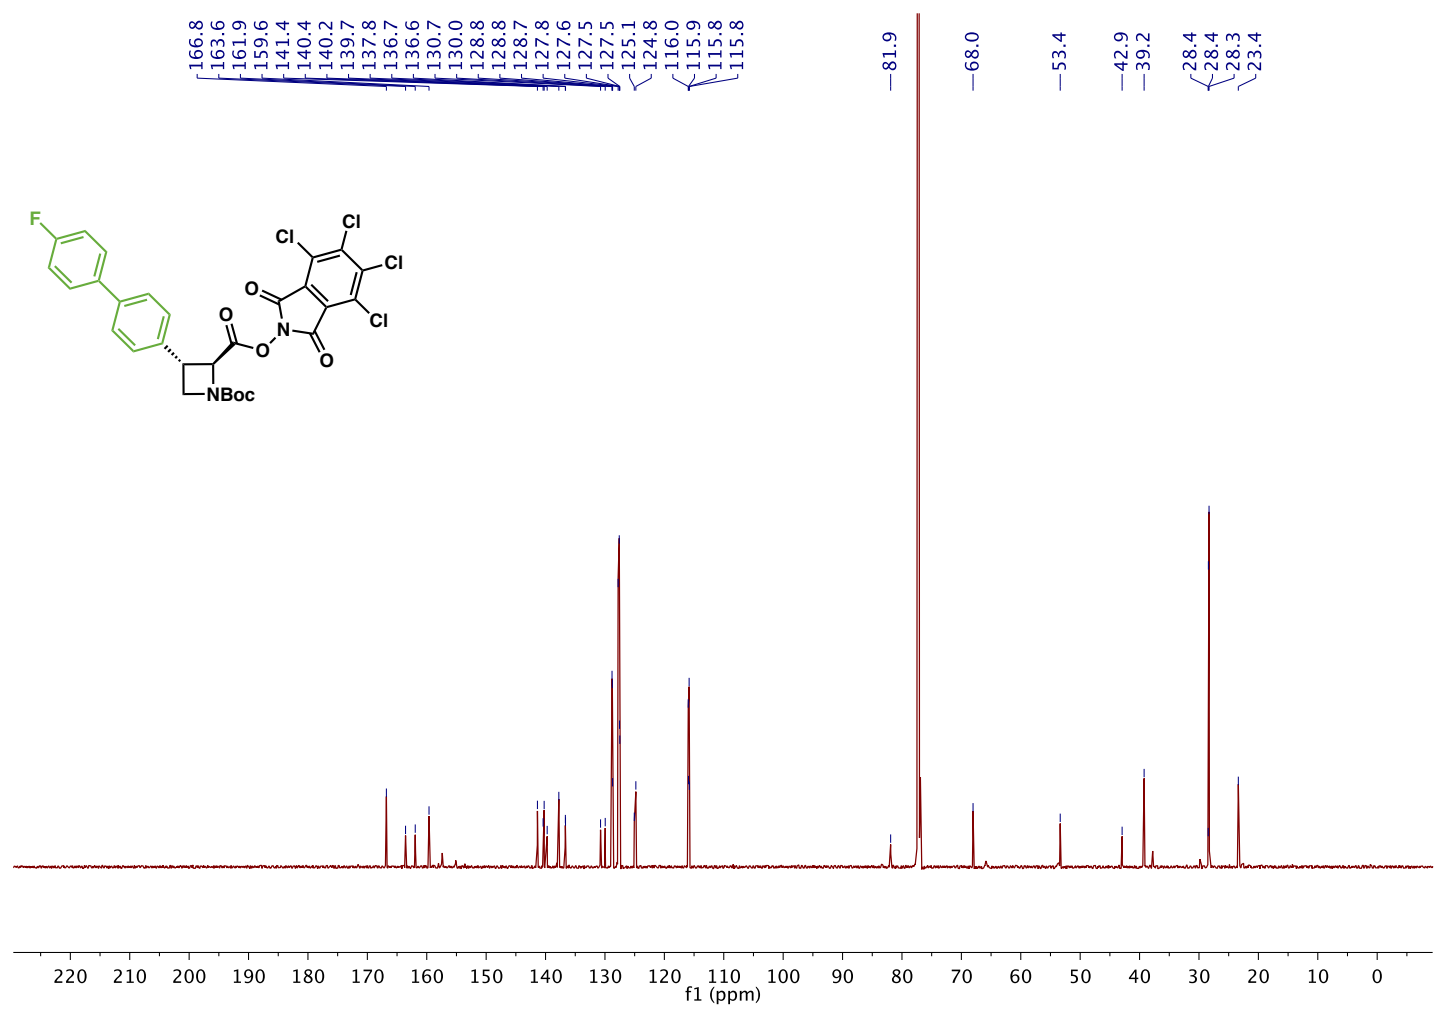

# Compound SI-46 – <sup>1</sup>H NMR

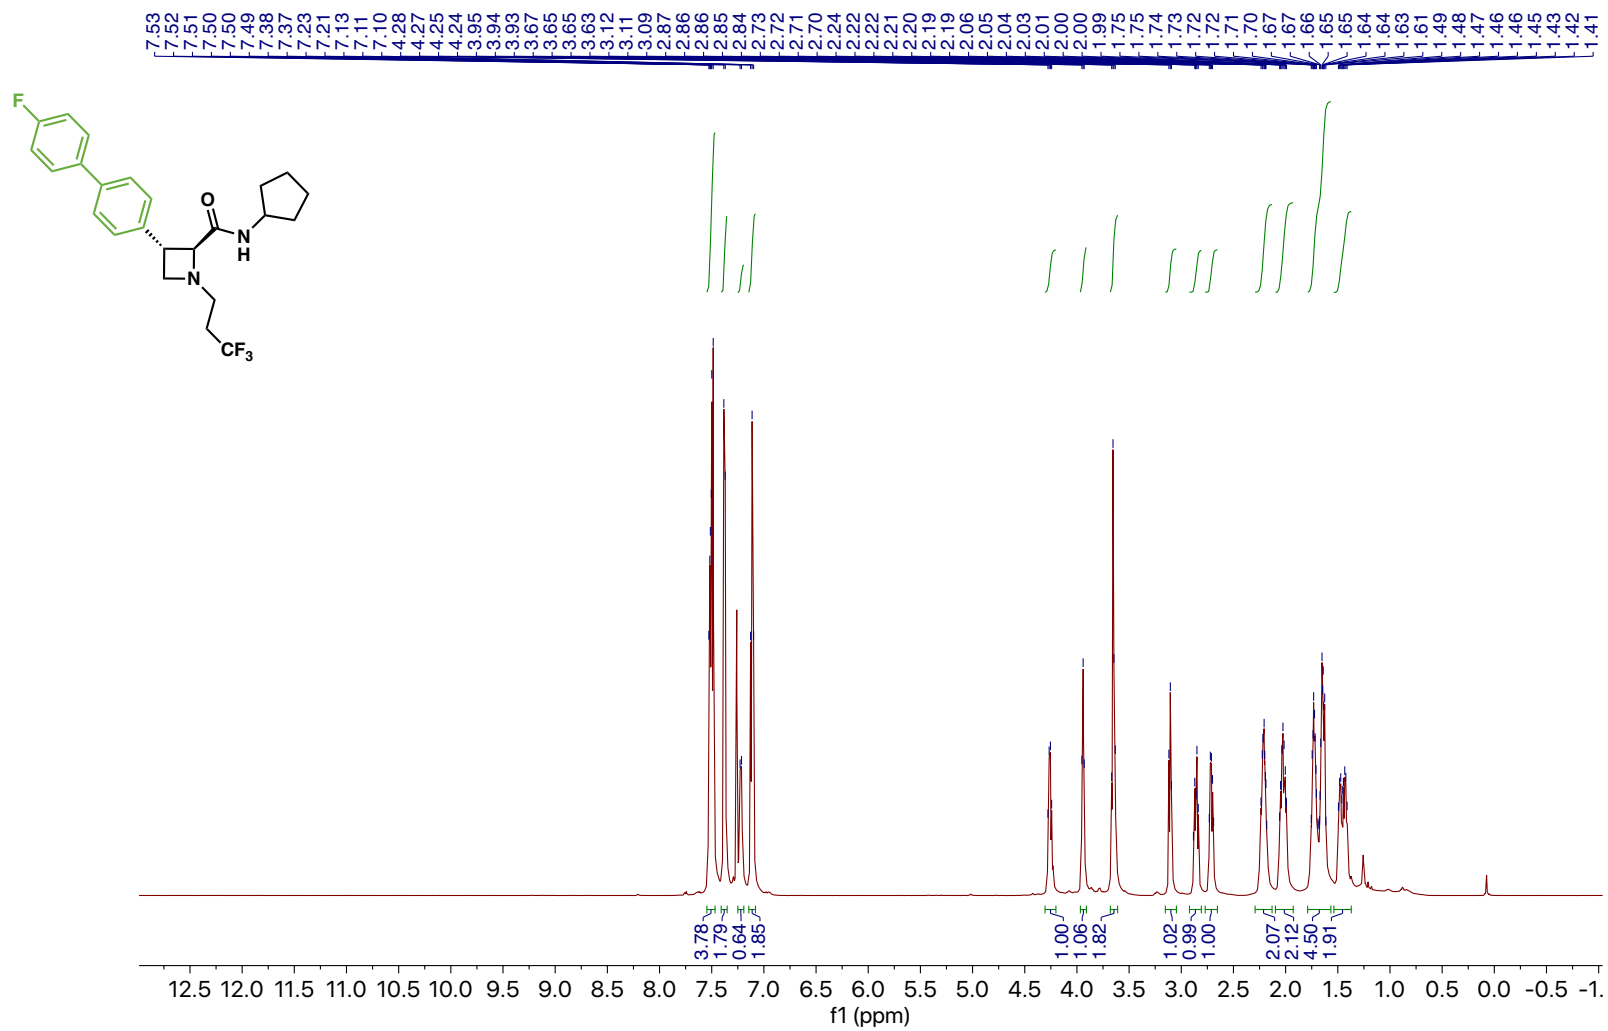

Compound SI-46 – <sup>19</sup>F NMR

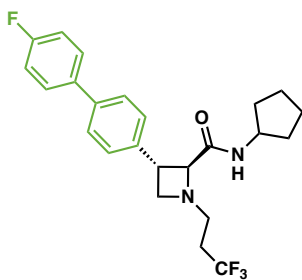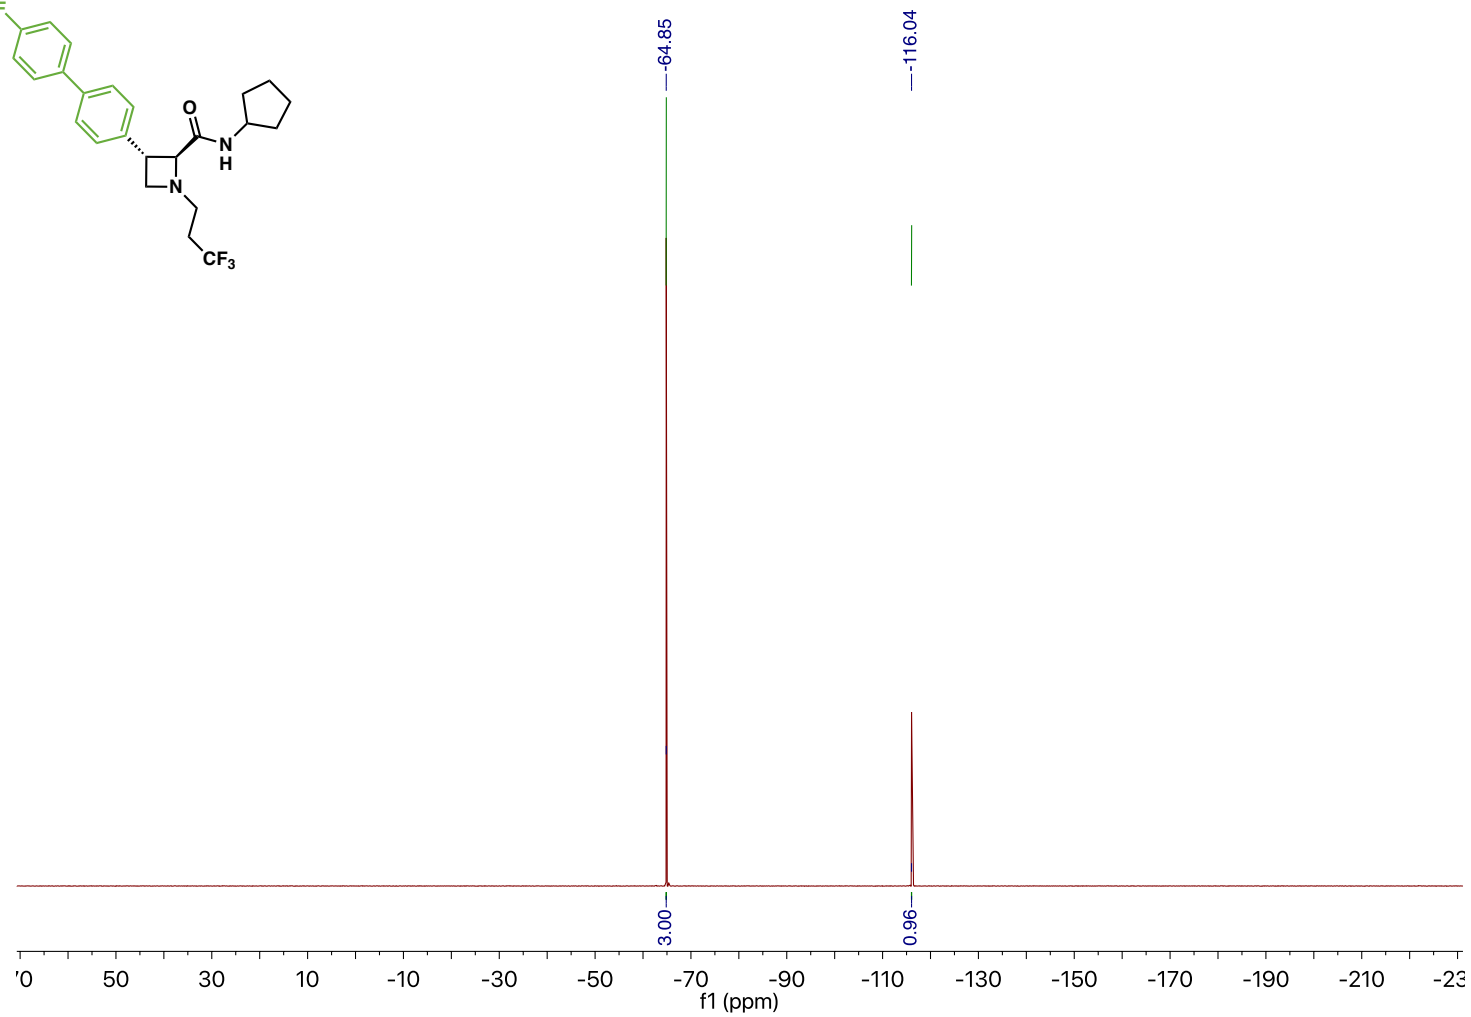

Compound SI-46 – <sup>13</sup>C NMR

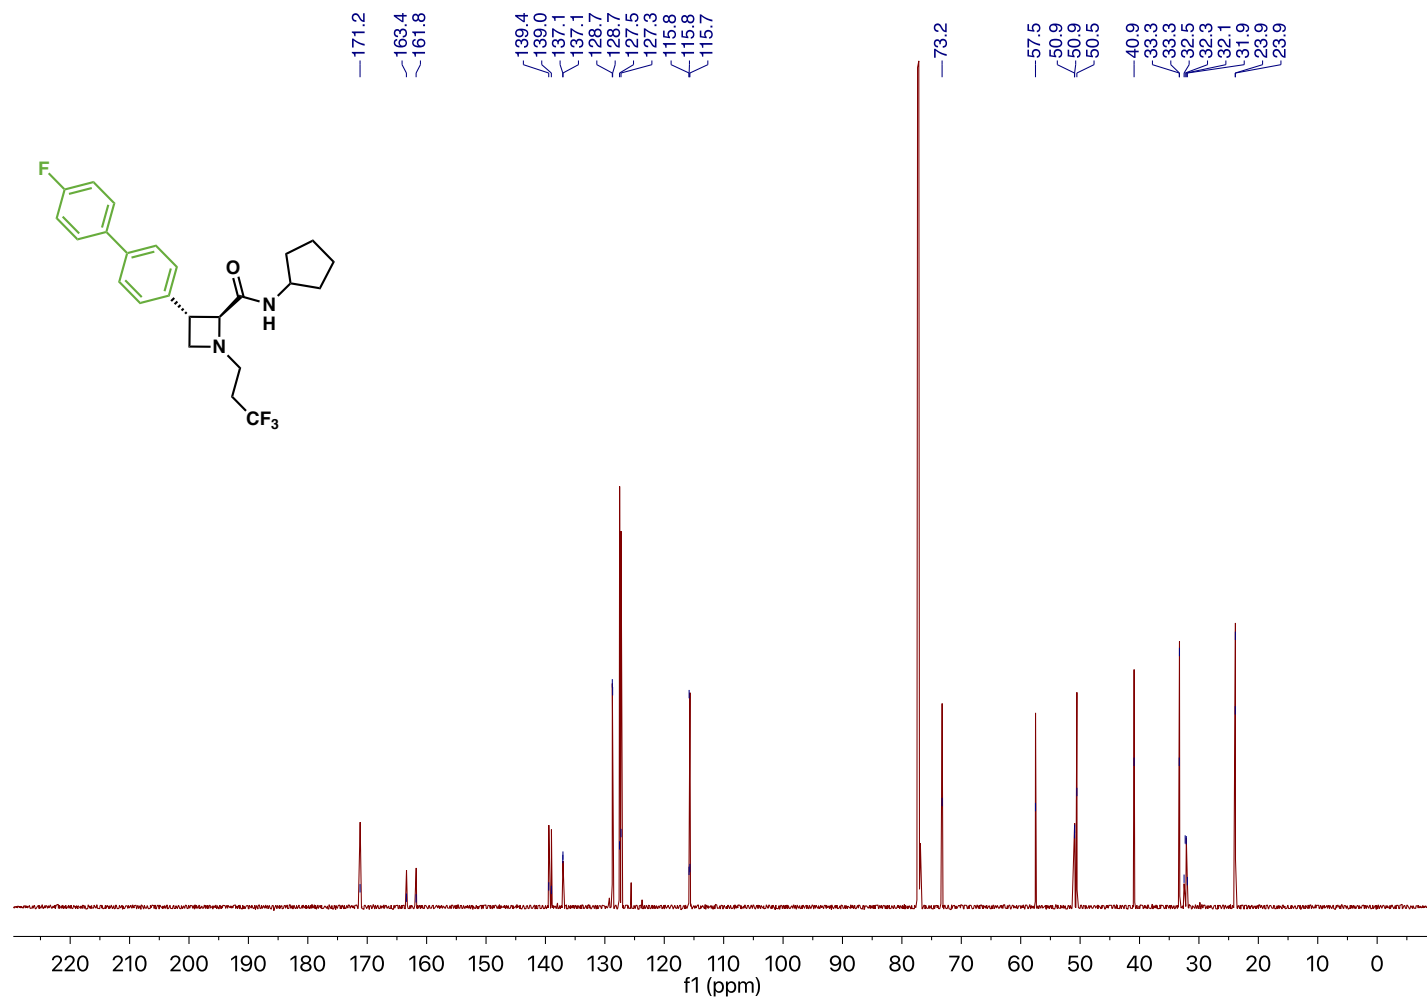

Compound 73 – <sup>1</sup>H NMR

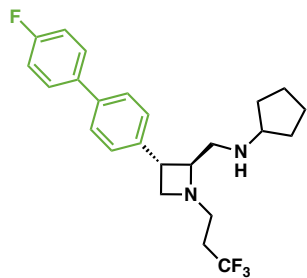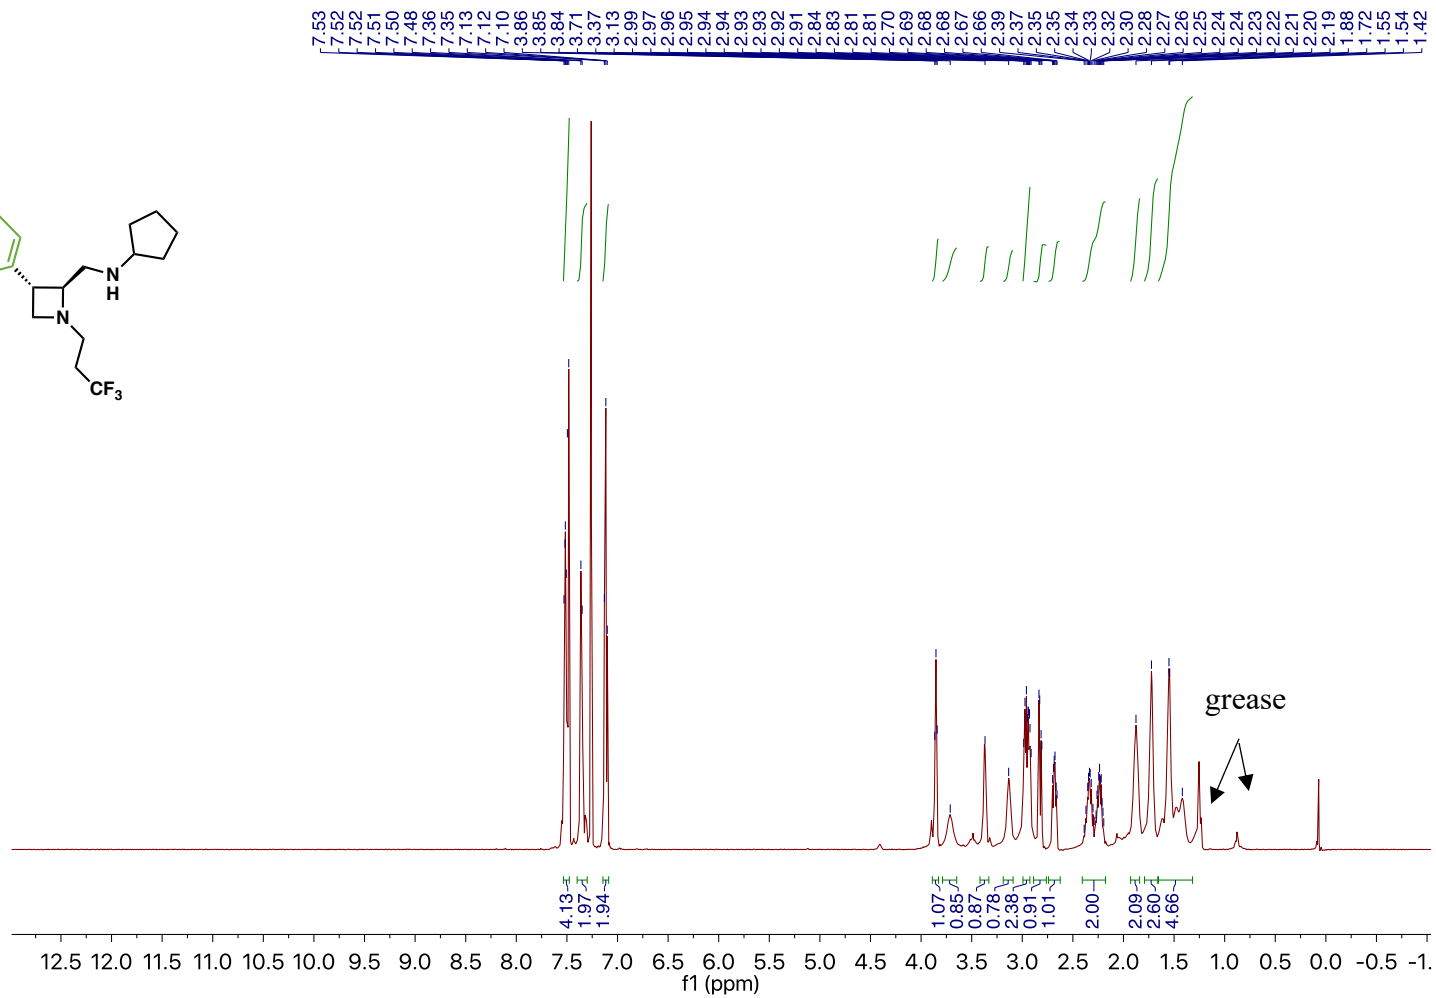

Compound 73 –  $^{19}\text{F}$  NMR

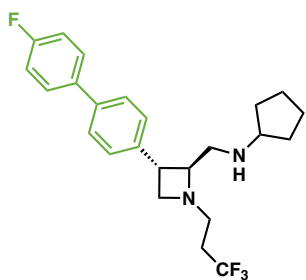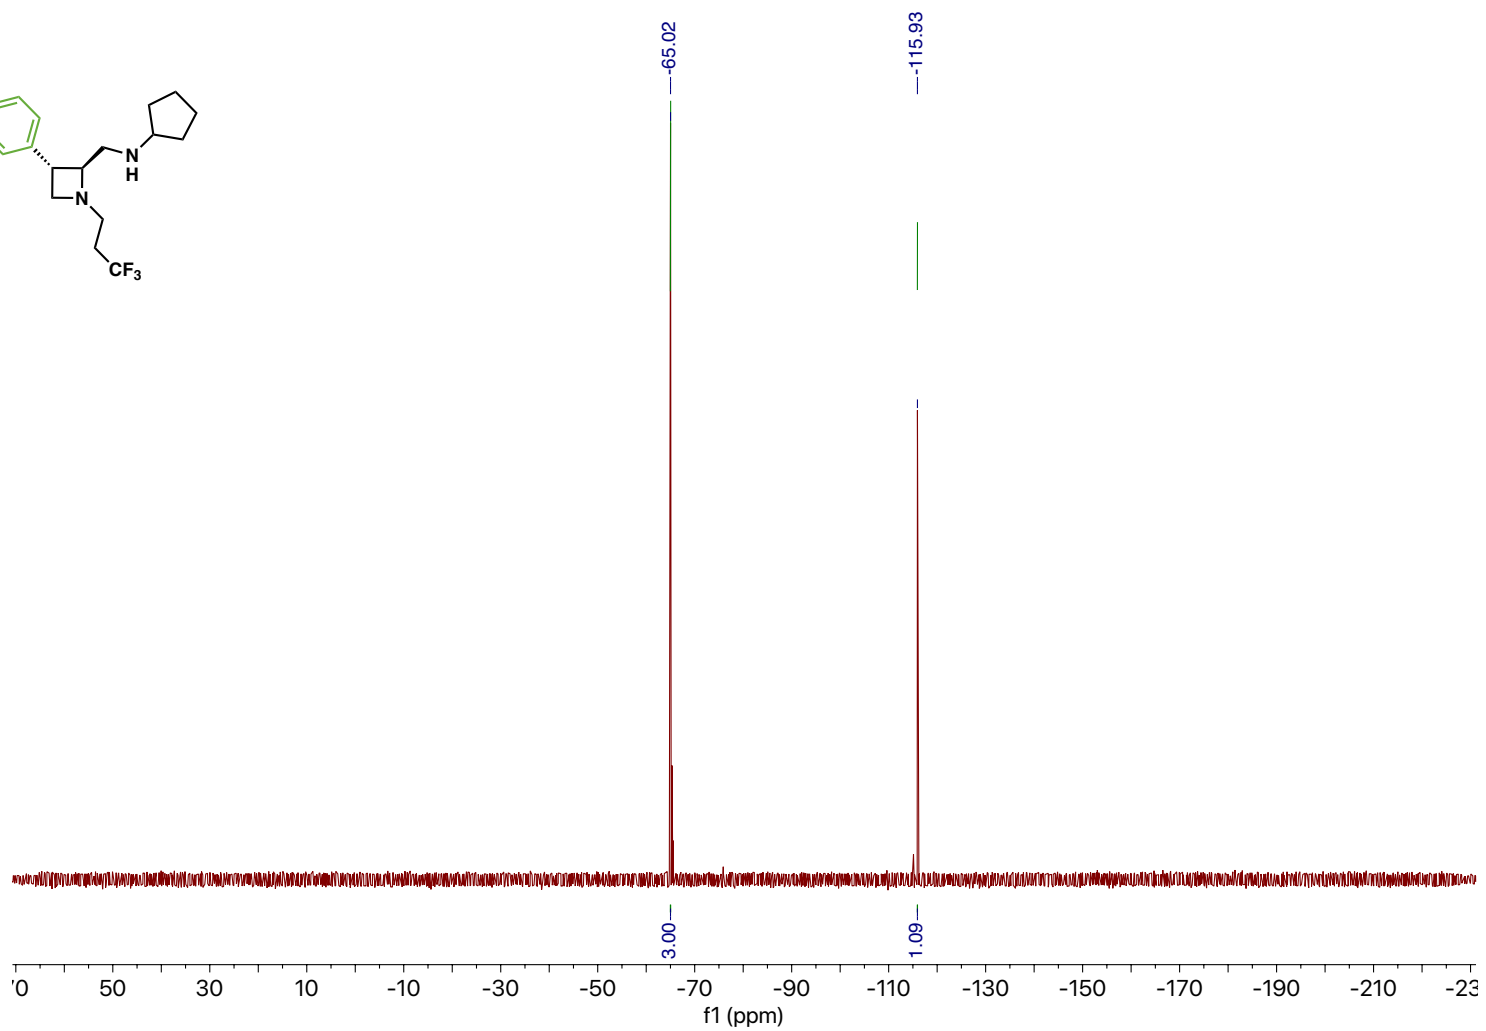

Compound 73 –  $^{13}\text{C}$  NMR

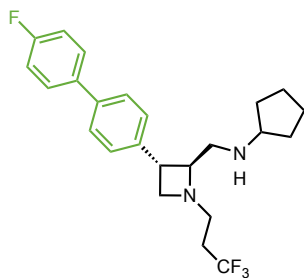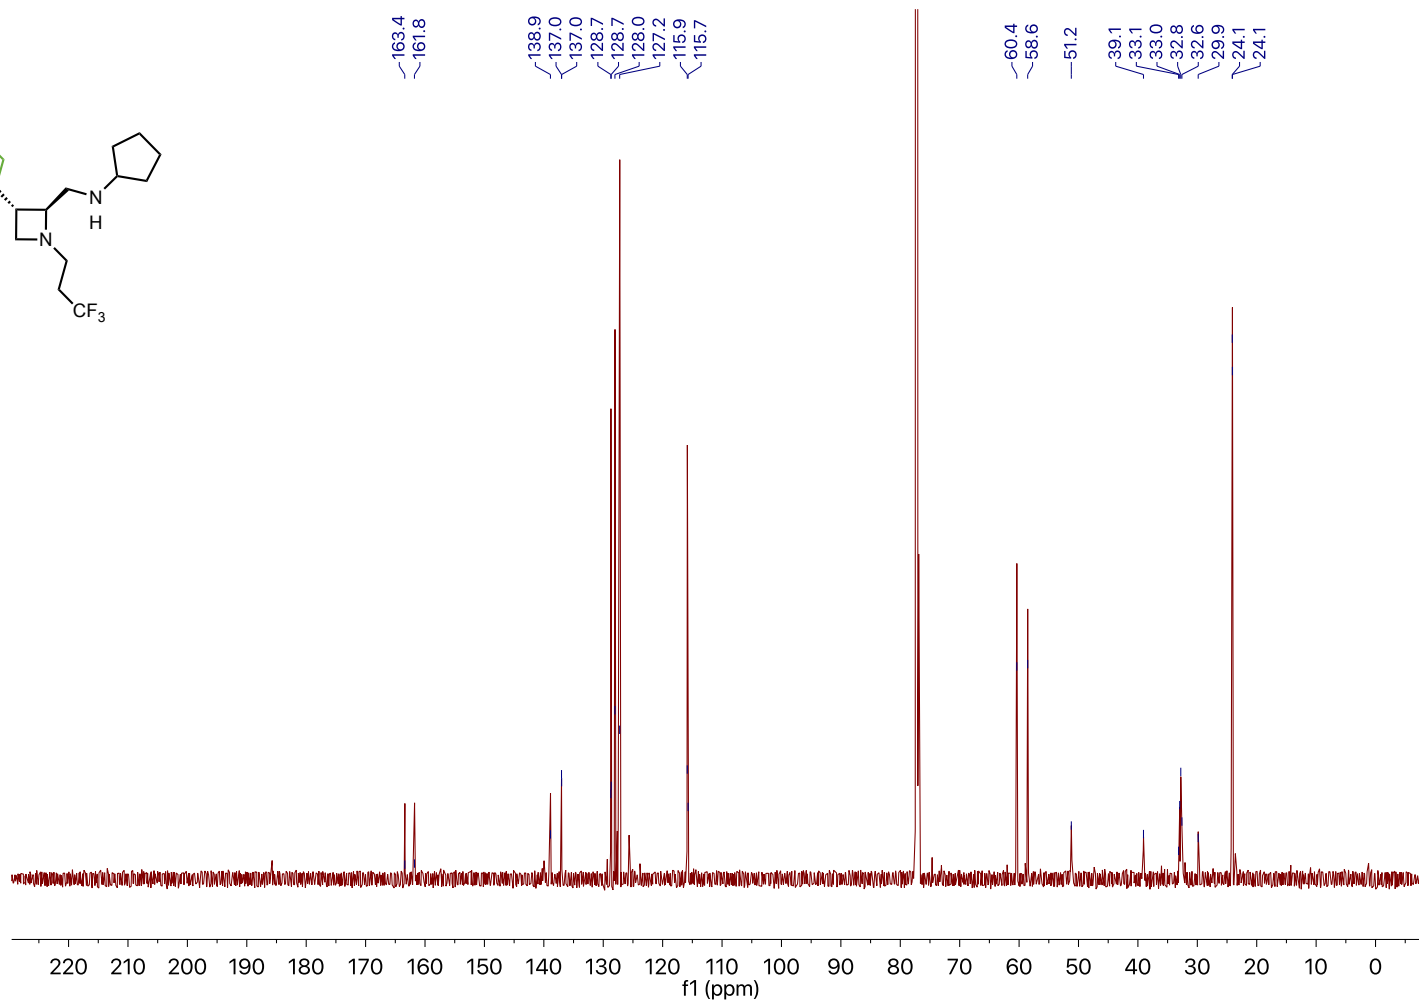

Compound 75 – <sup>1</sup>H NMR

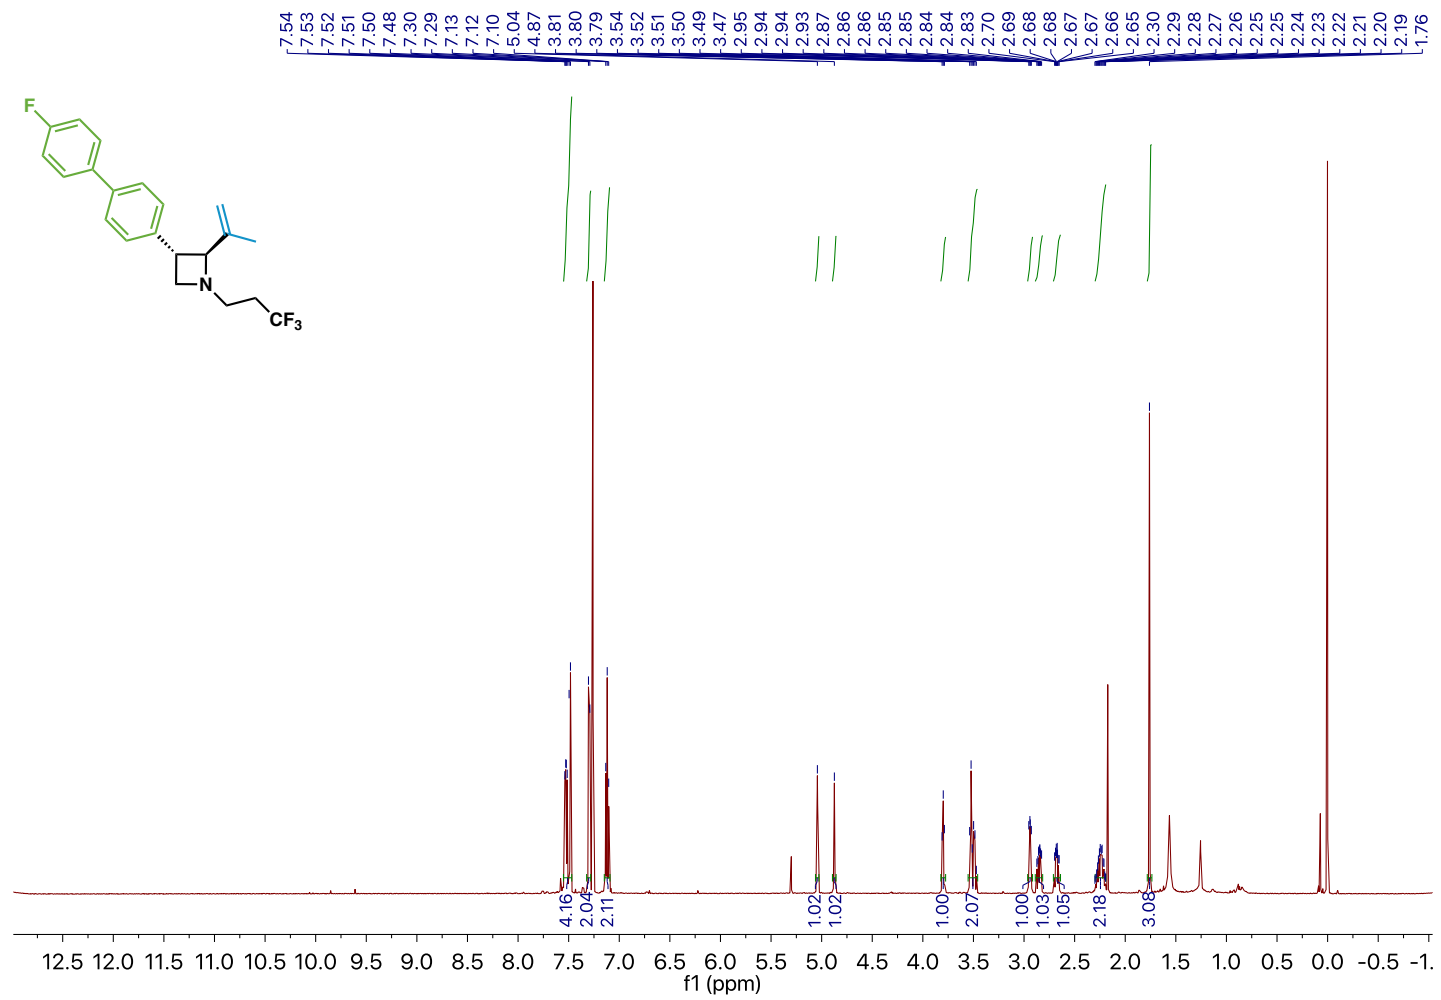



Compound 75 –  $^{19}\text{F}$  NMR

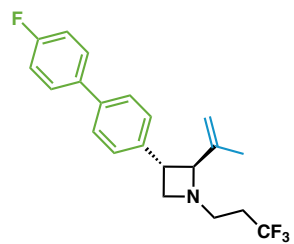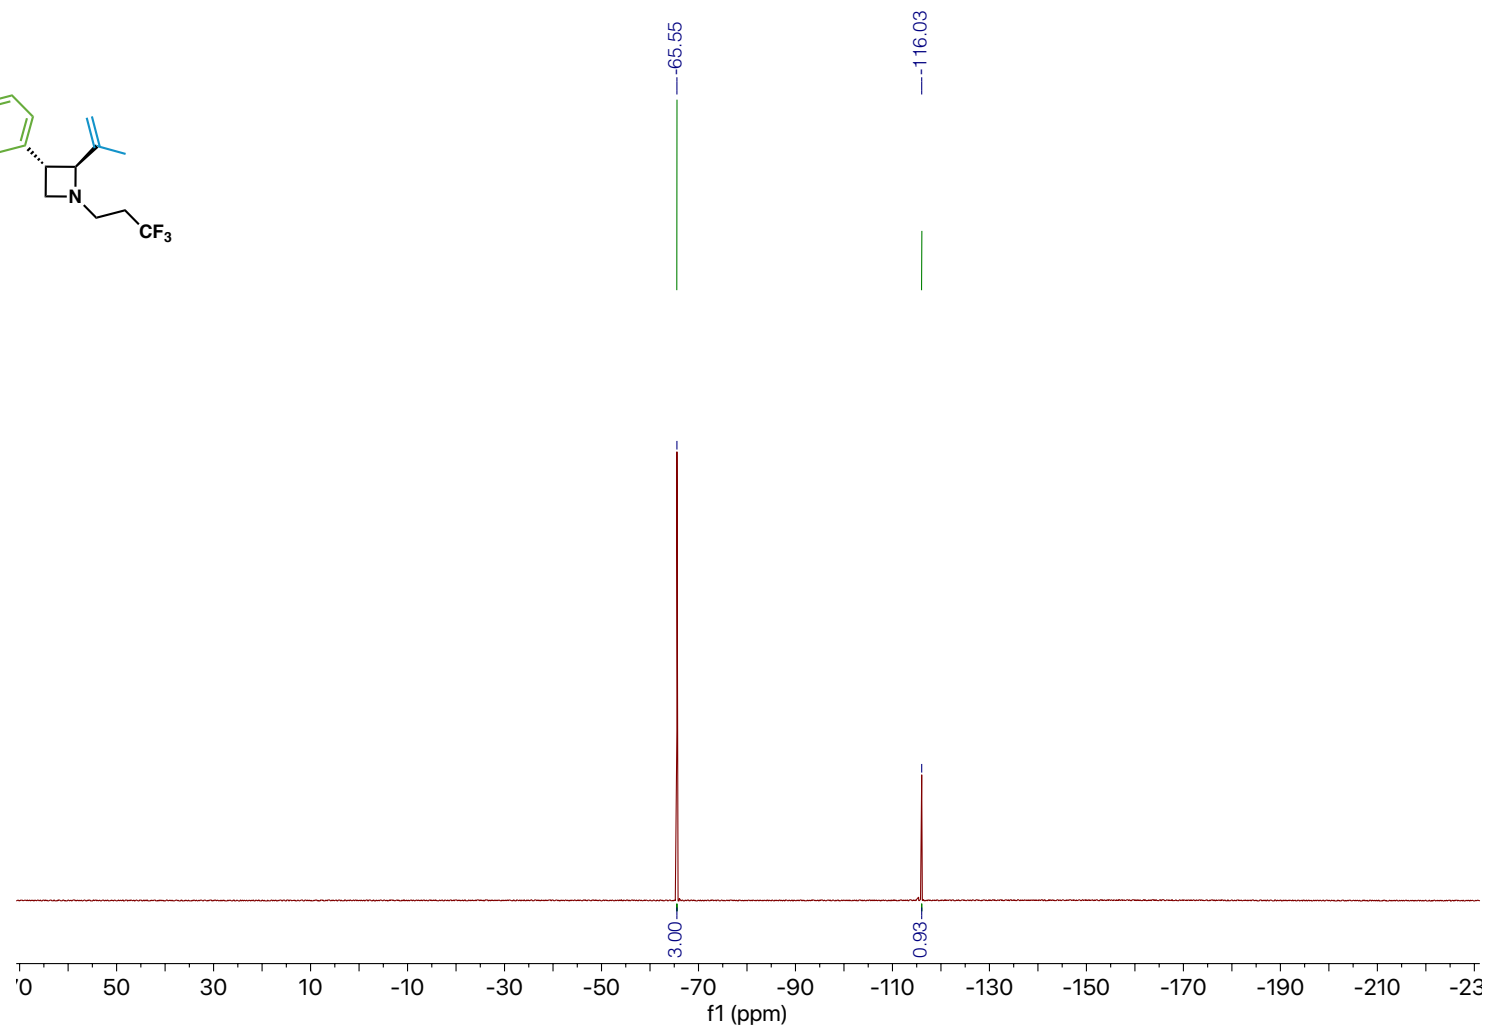

Compound 75 –  $^{13}\text{C}$  NMR

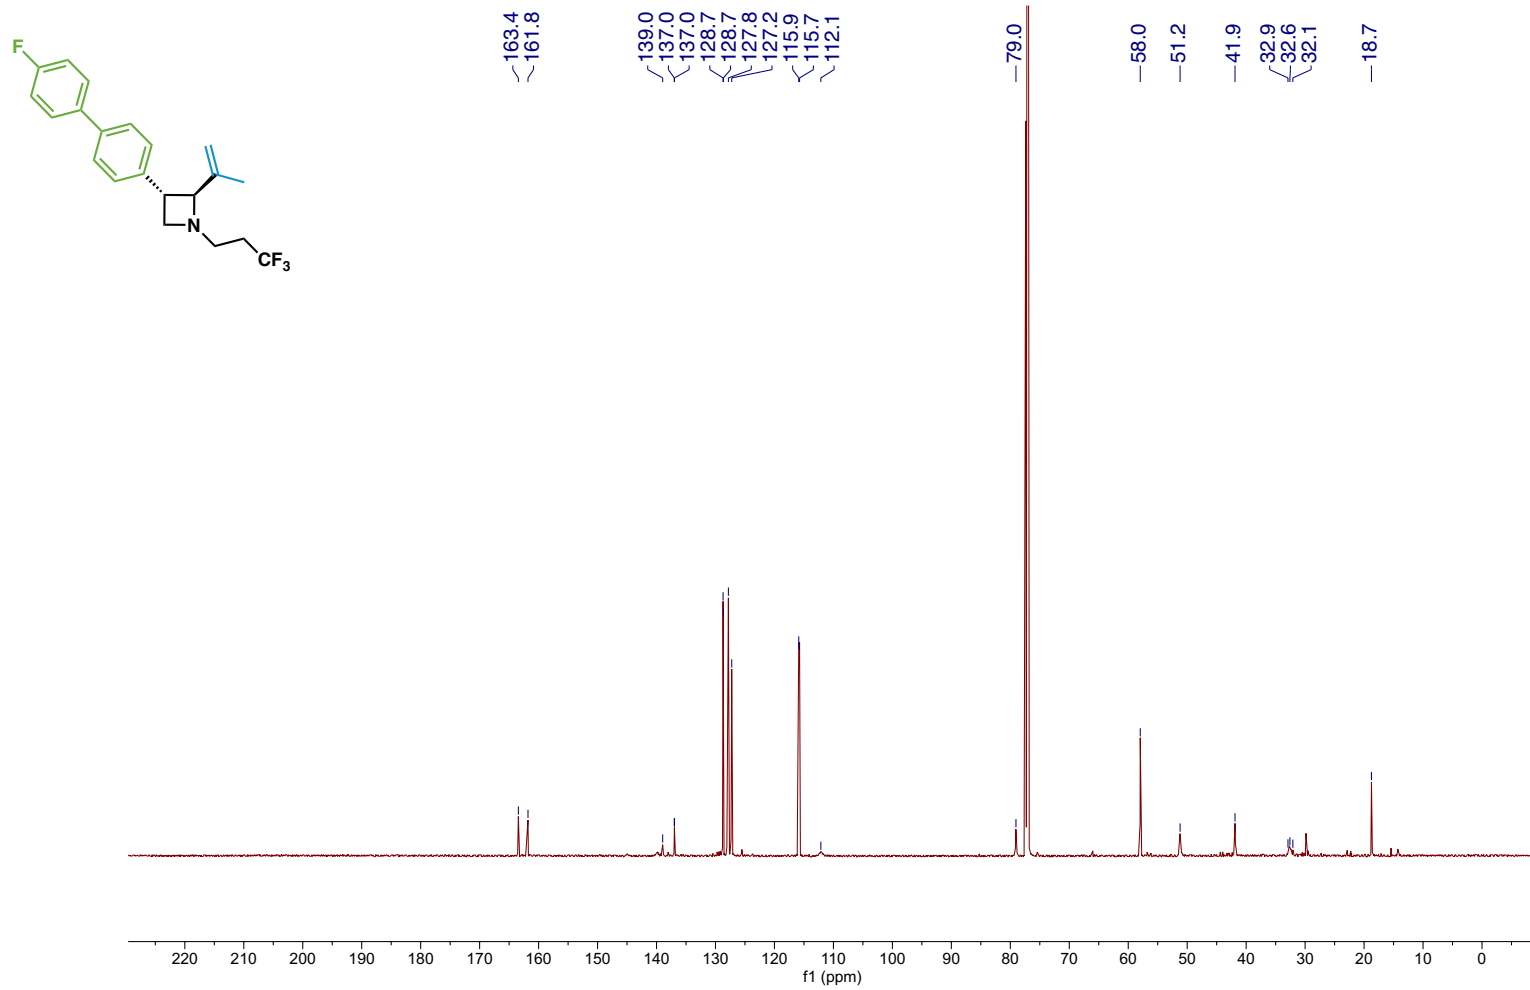

Compound SI-47 – <sup>1</sup>H NMR

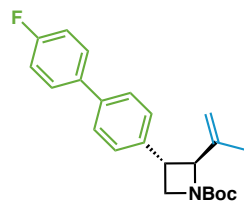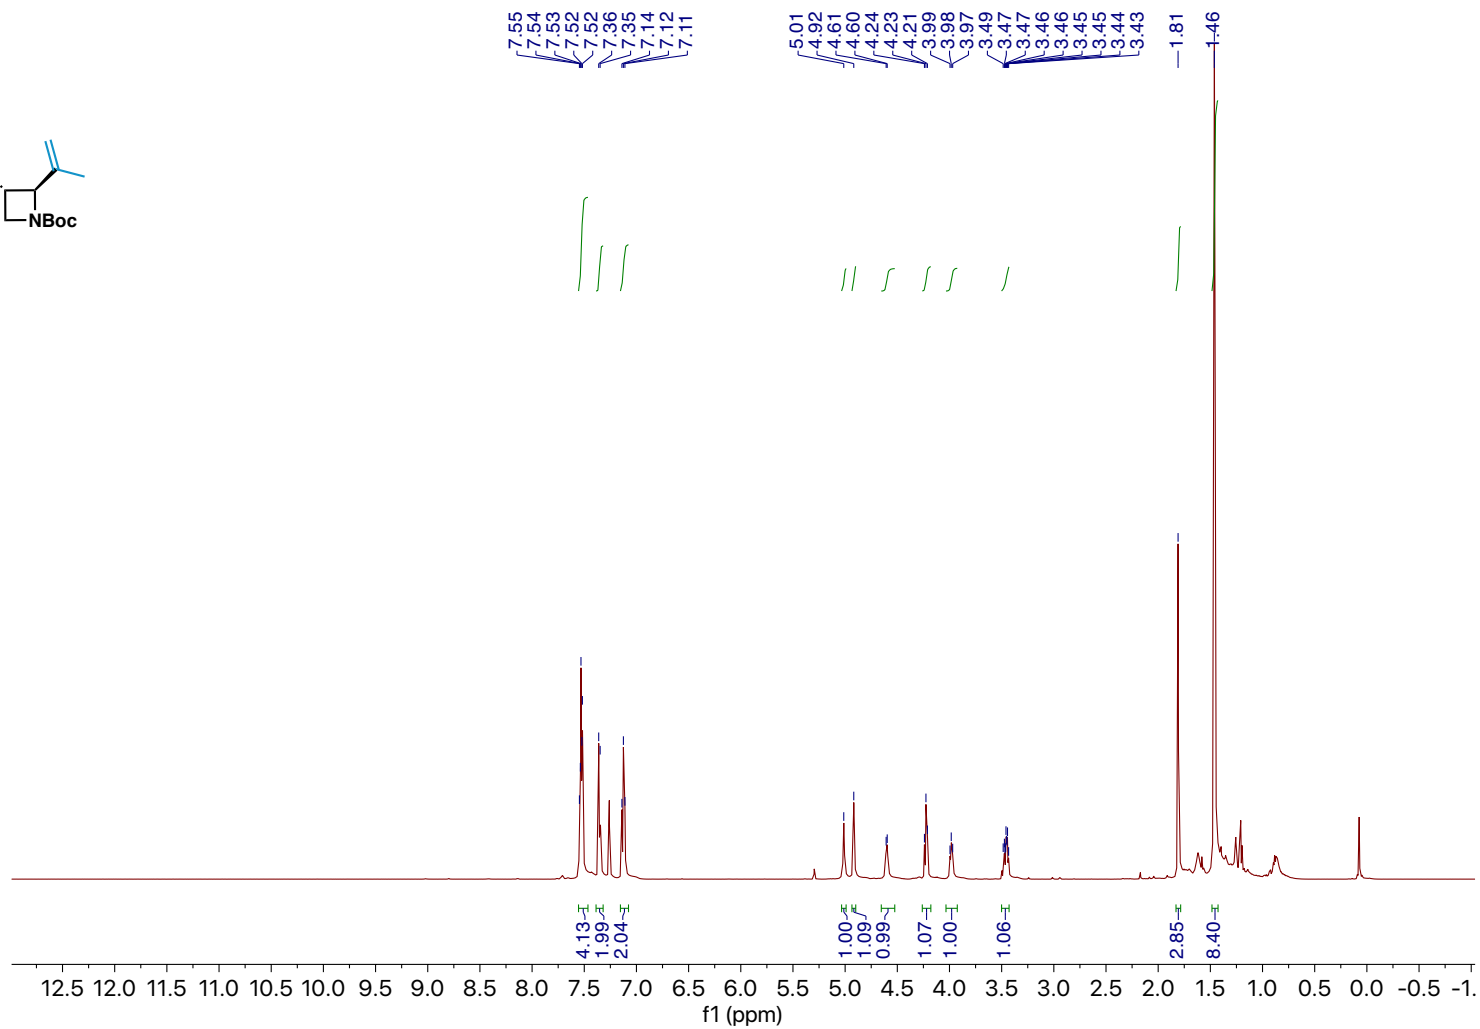

Compound SI-47 – <sup>19</sup>F NMR

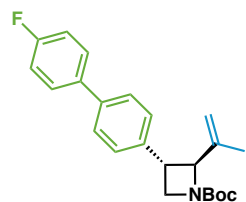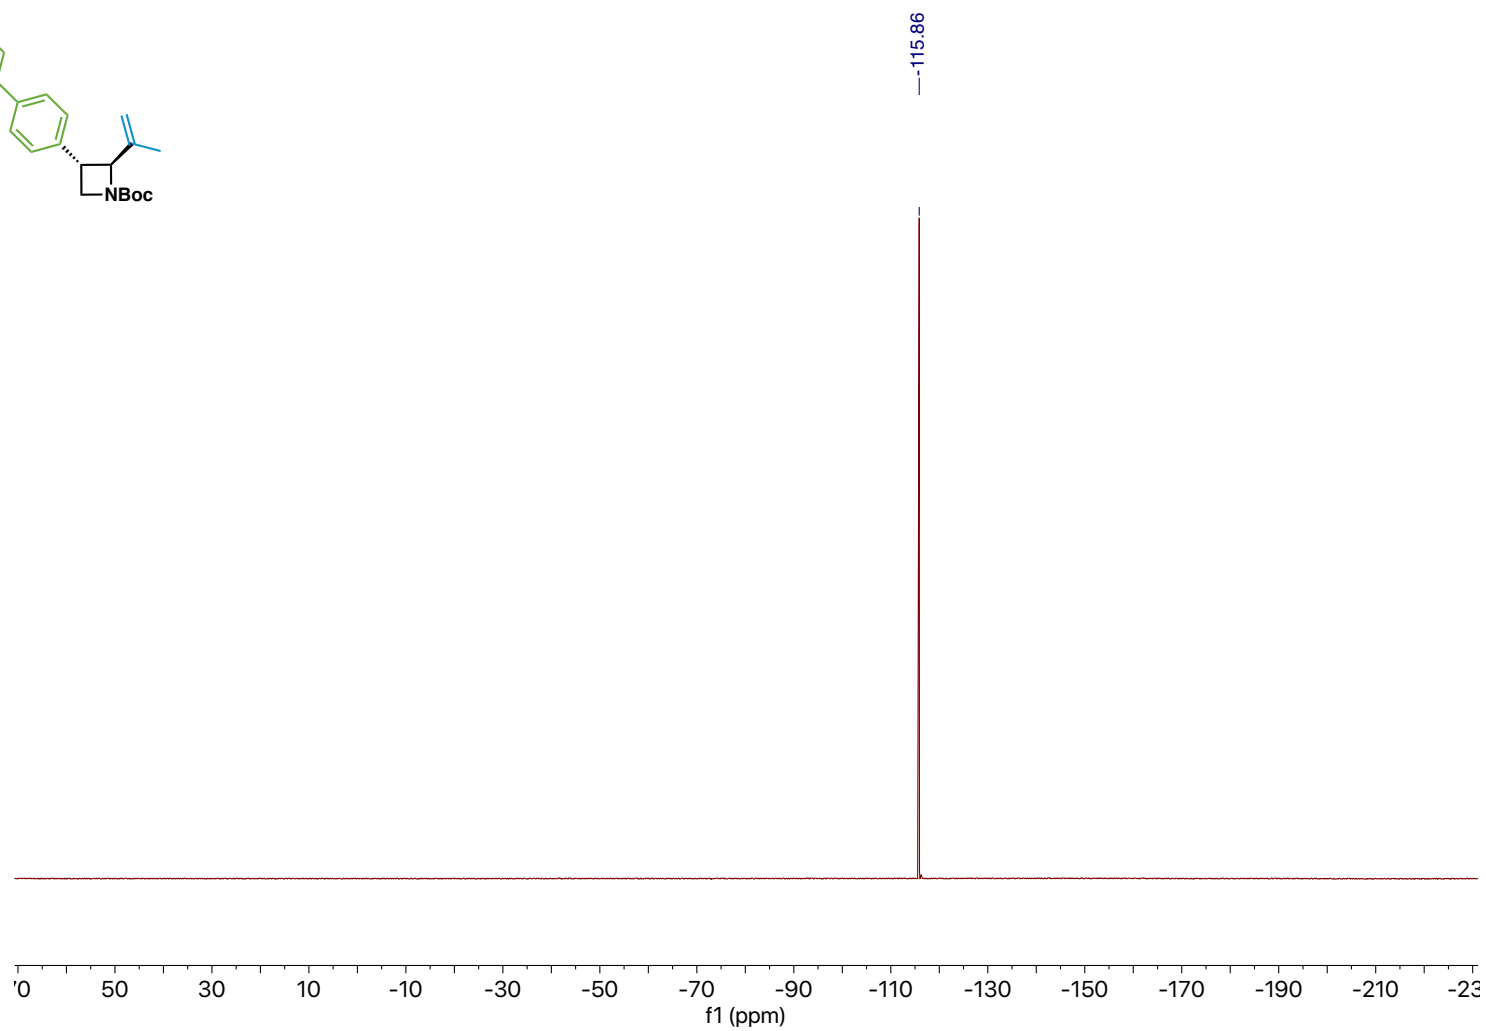

S452

Compound SI-47 – <sup>13</sup>C NMR

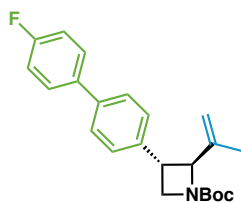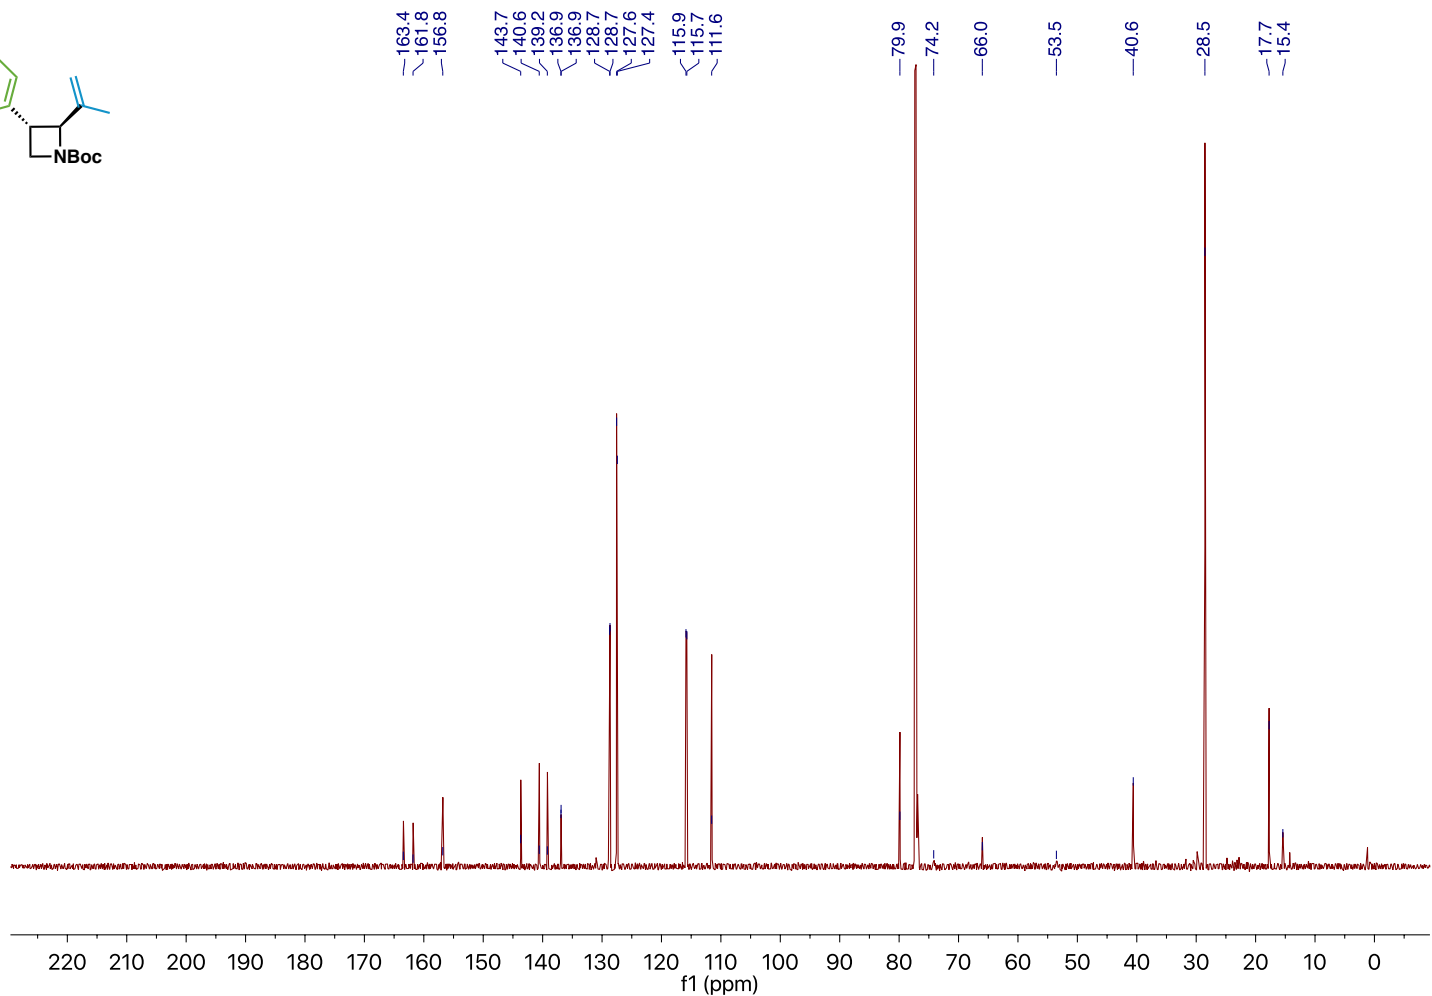

# Compound 76 – <sup>1</sup>H NMR

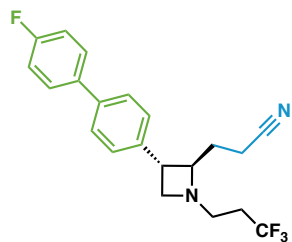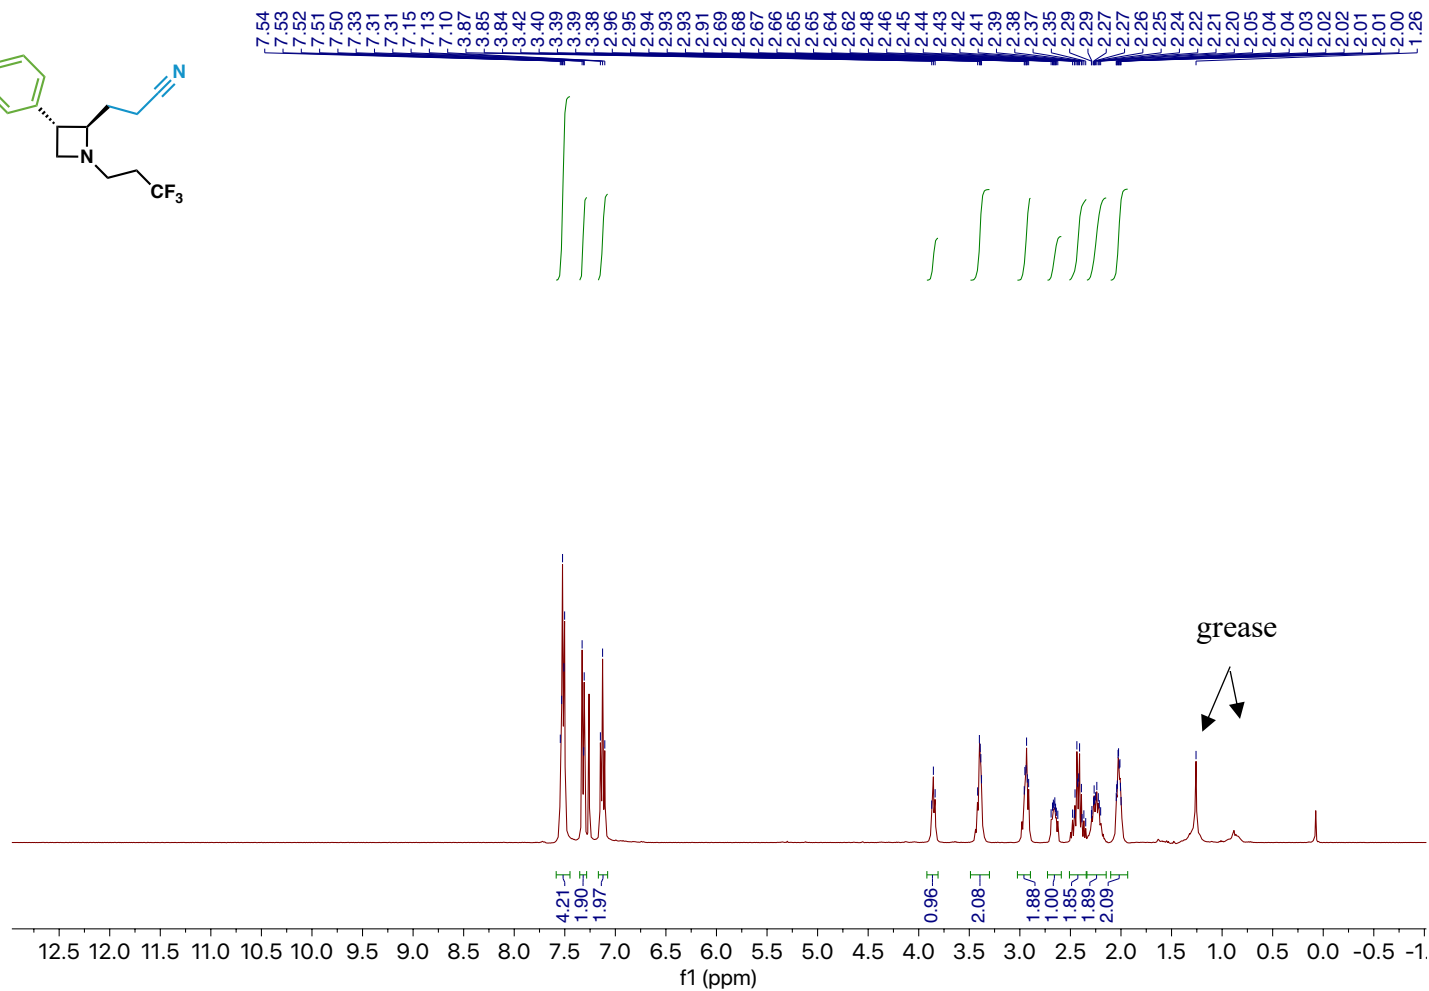

Compound 76 –  $^{19}\text{F}$  NMR

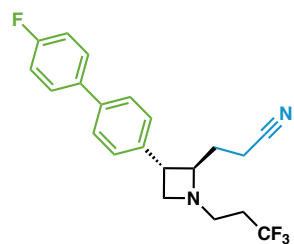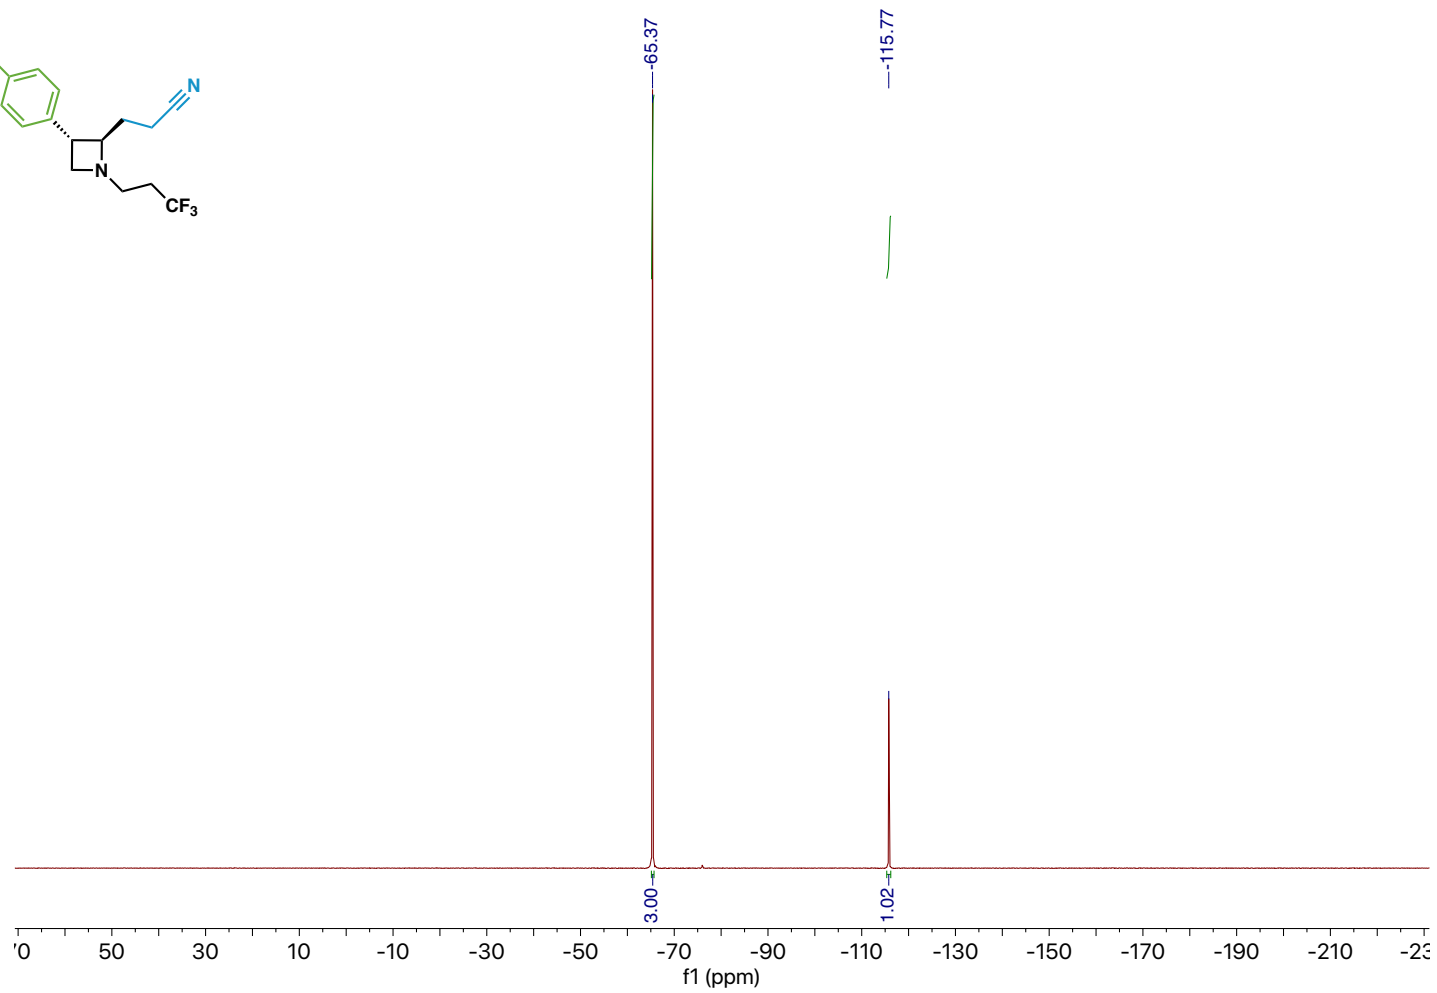

Compound 76 – <sup>13</sup>C NMR

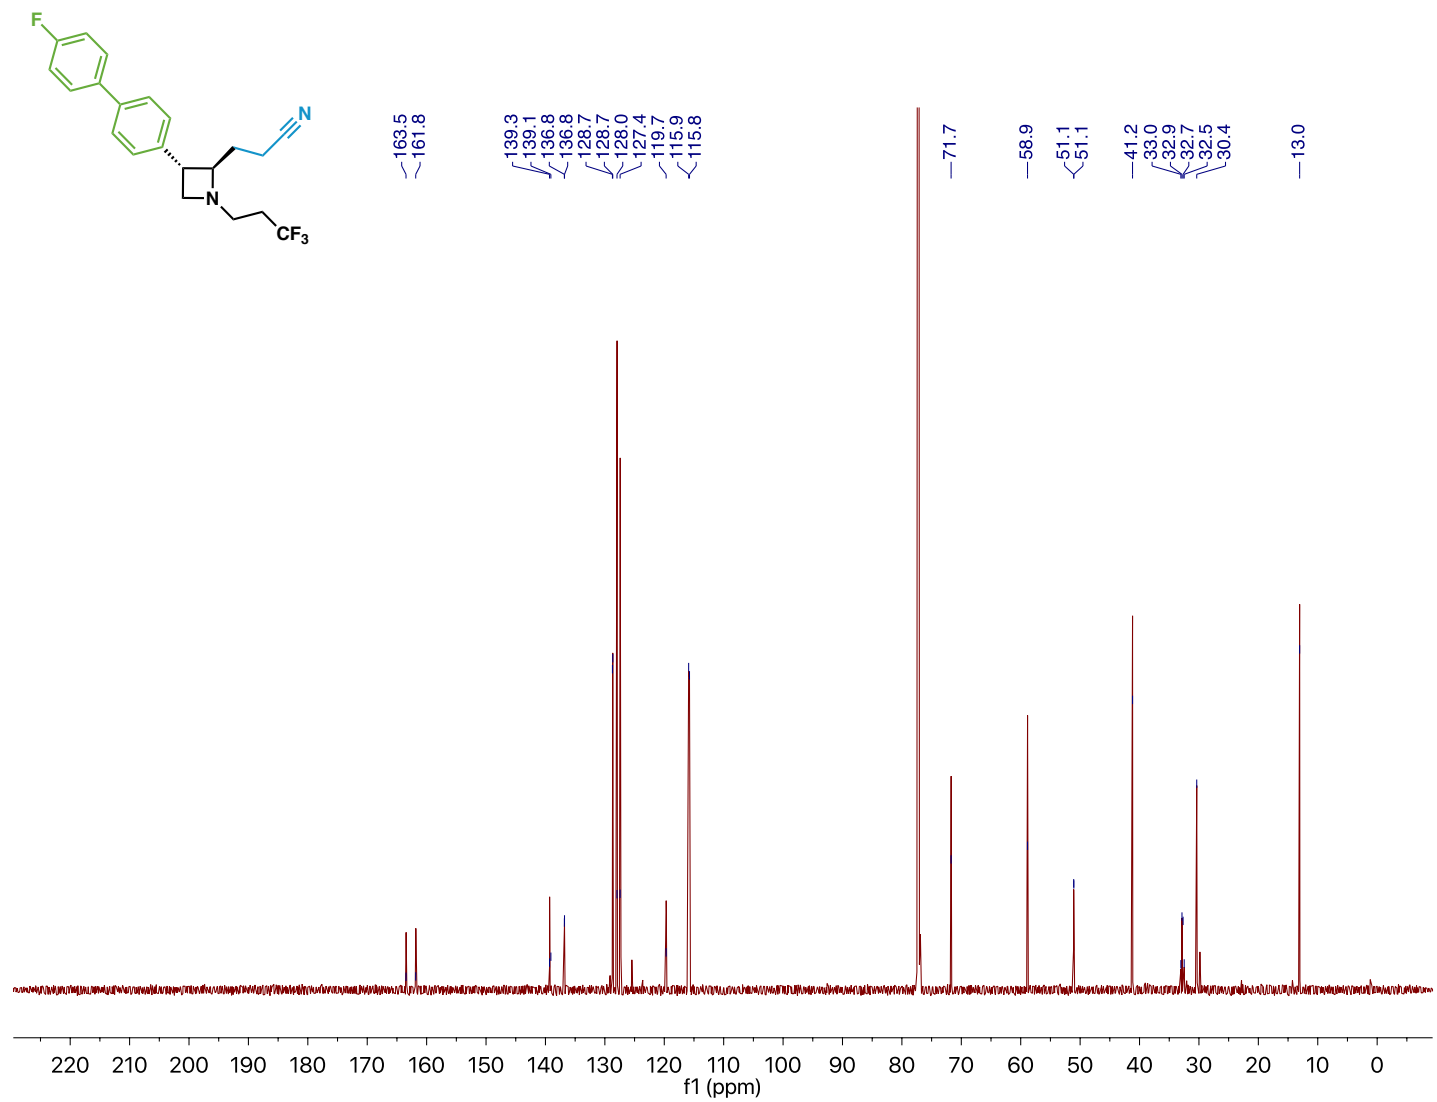



Compound SI-48 – <sup>1</sup>H NMR

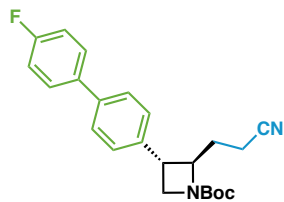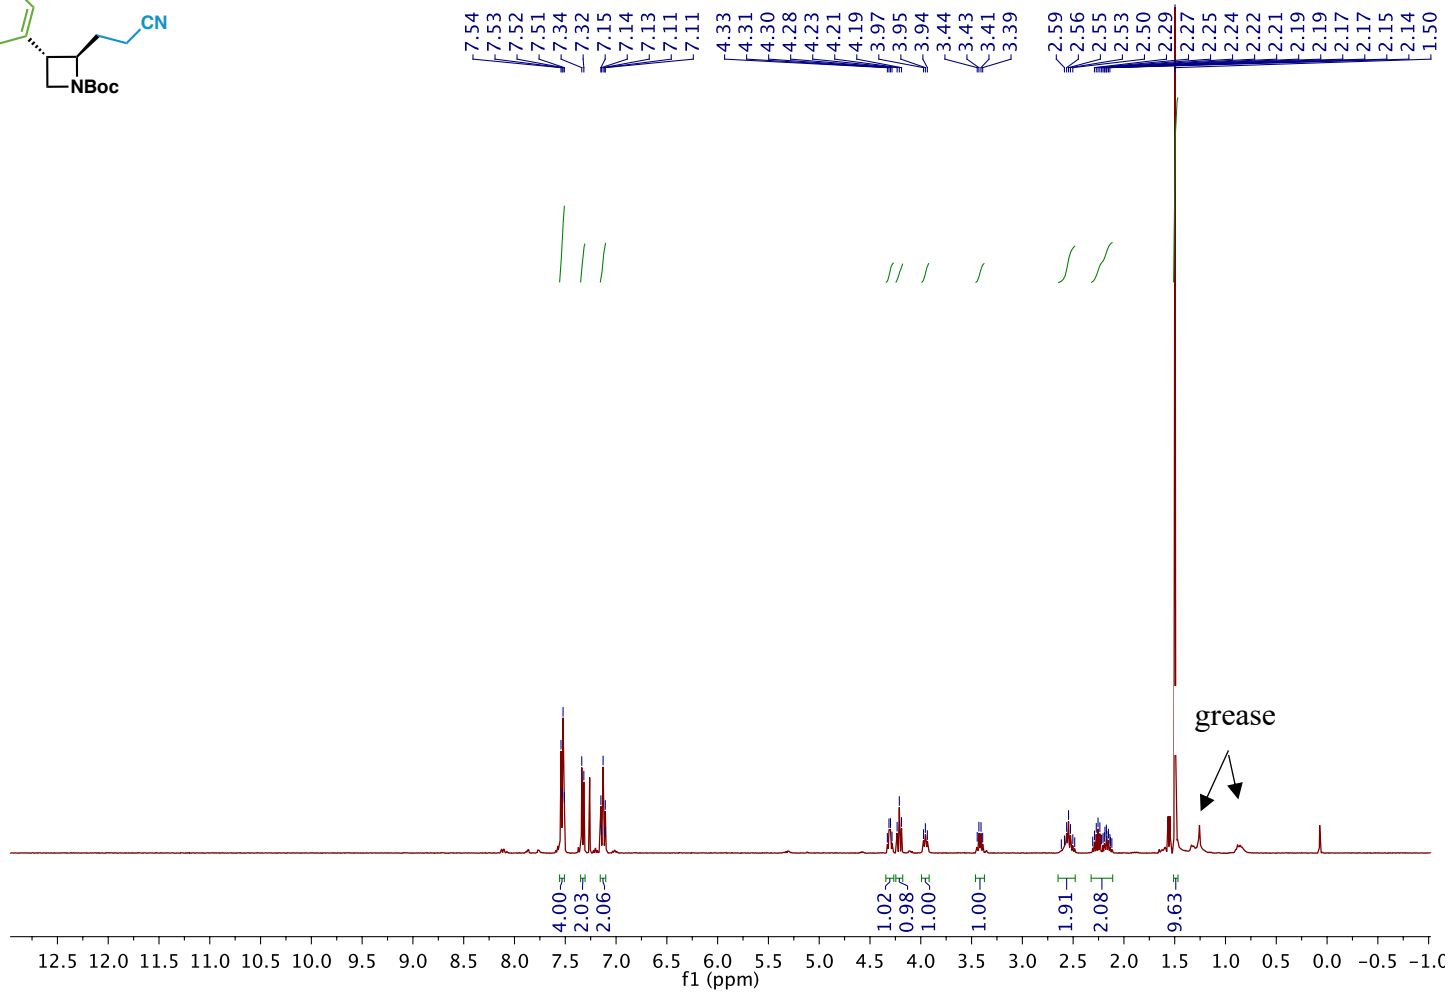

Compound SI-48 –  $^{19}\text{F}$  NMR

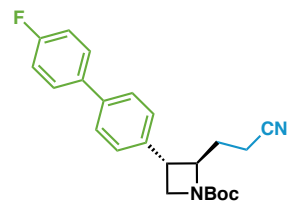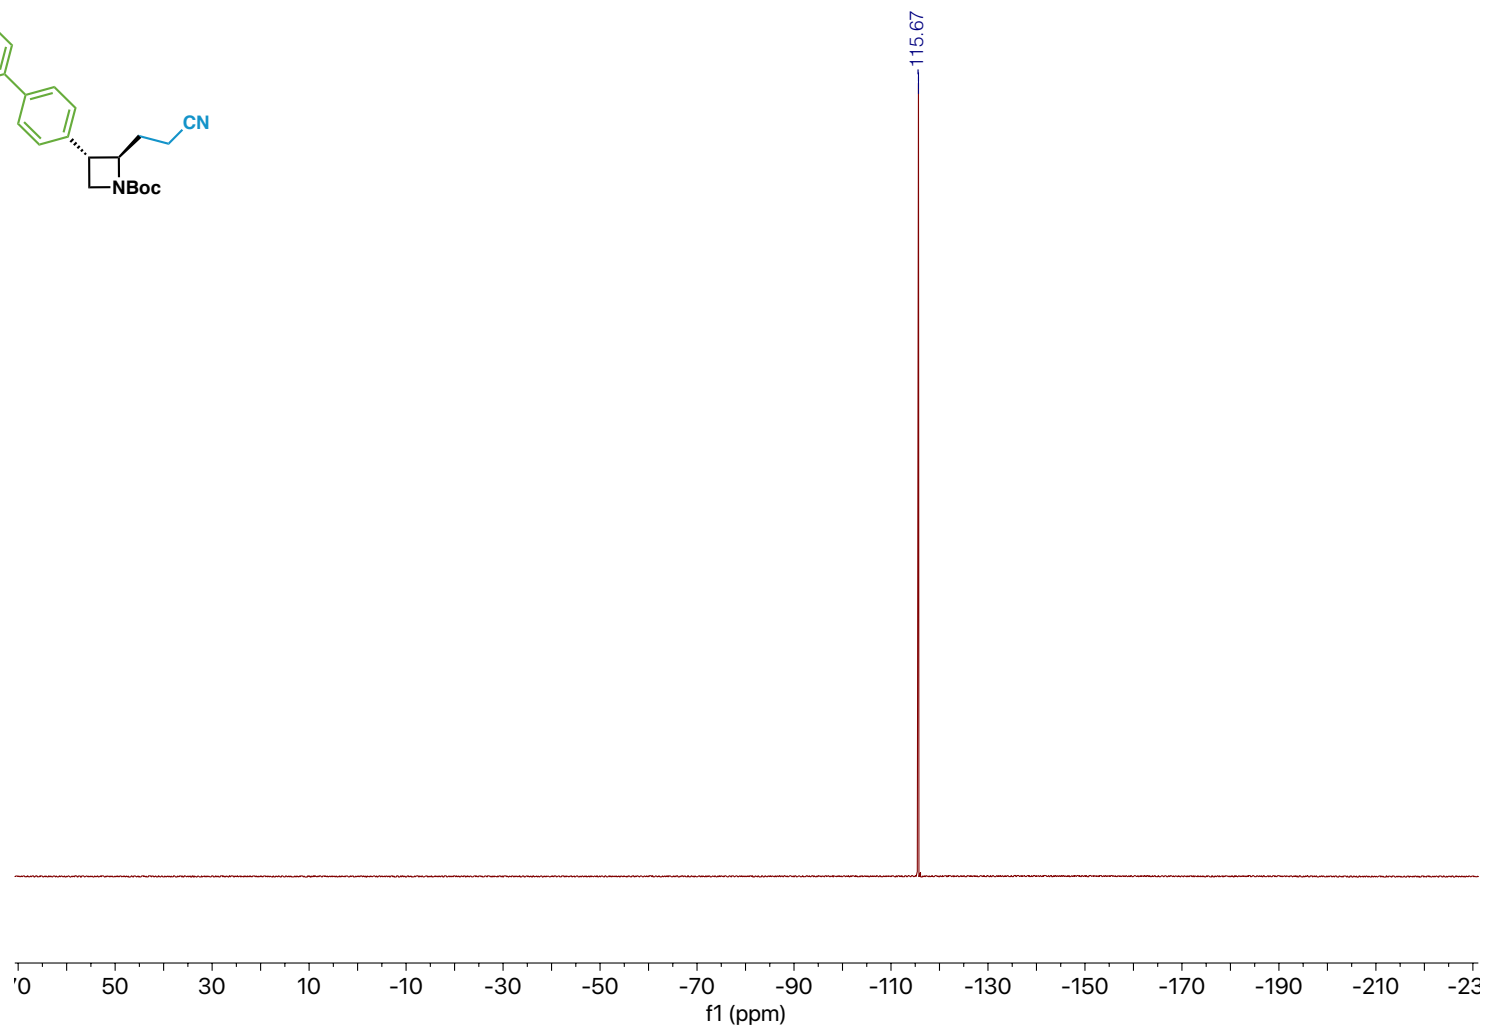

S458

Compound SI-48 – <sup>13</sup>C NMR

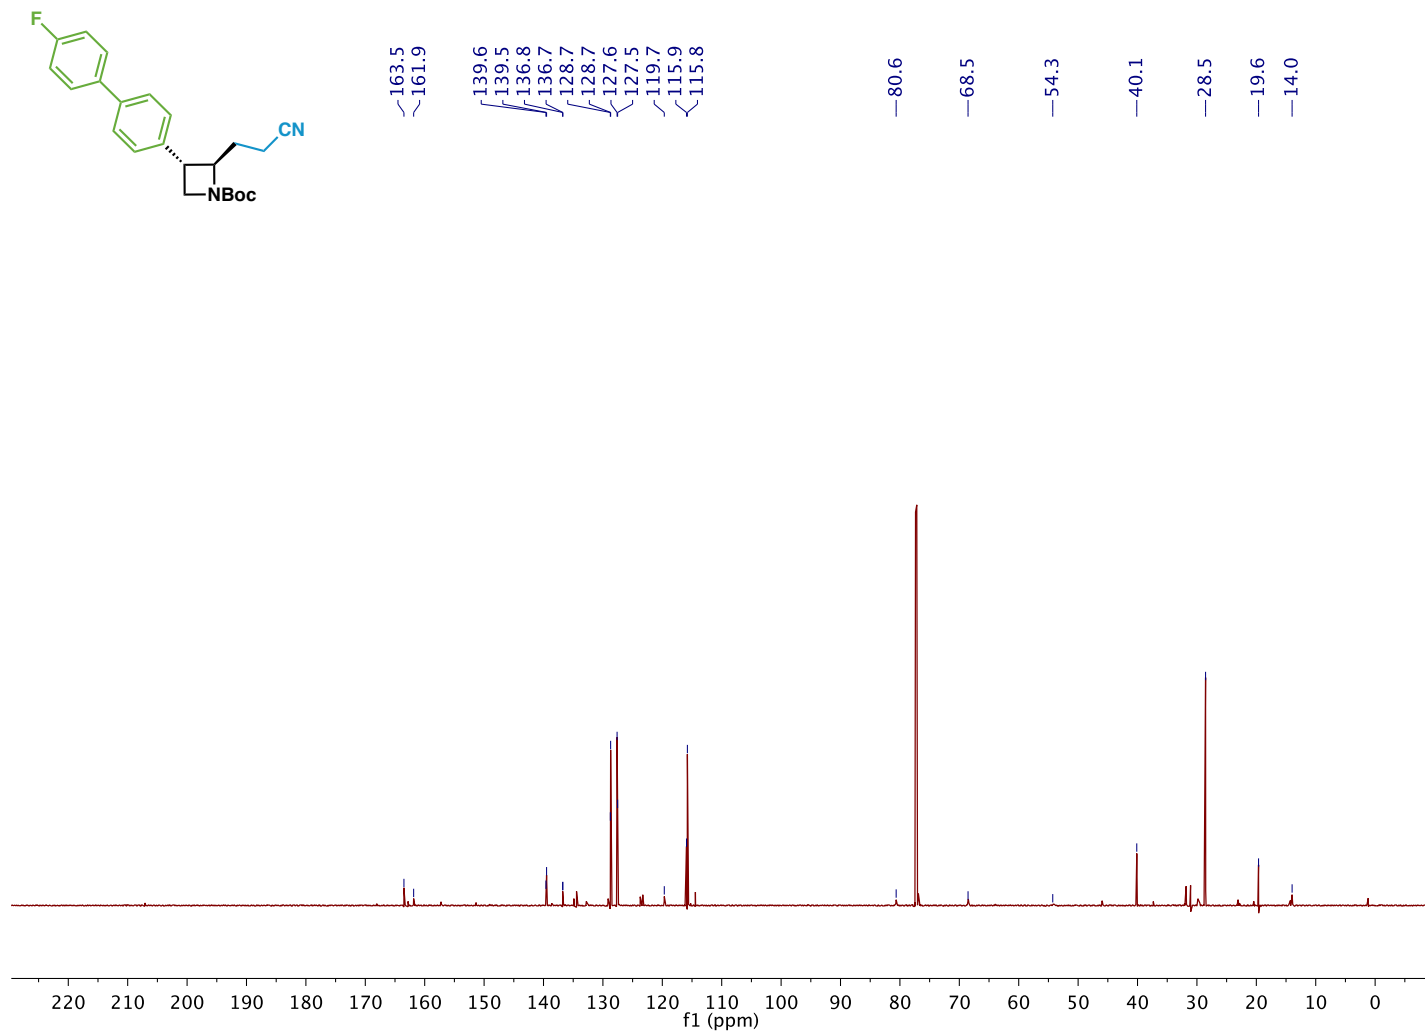

Compound 77 – <sup>1</sup>H NMR

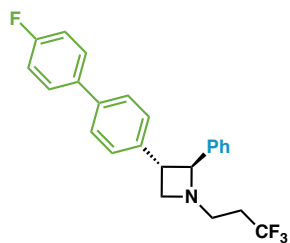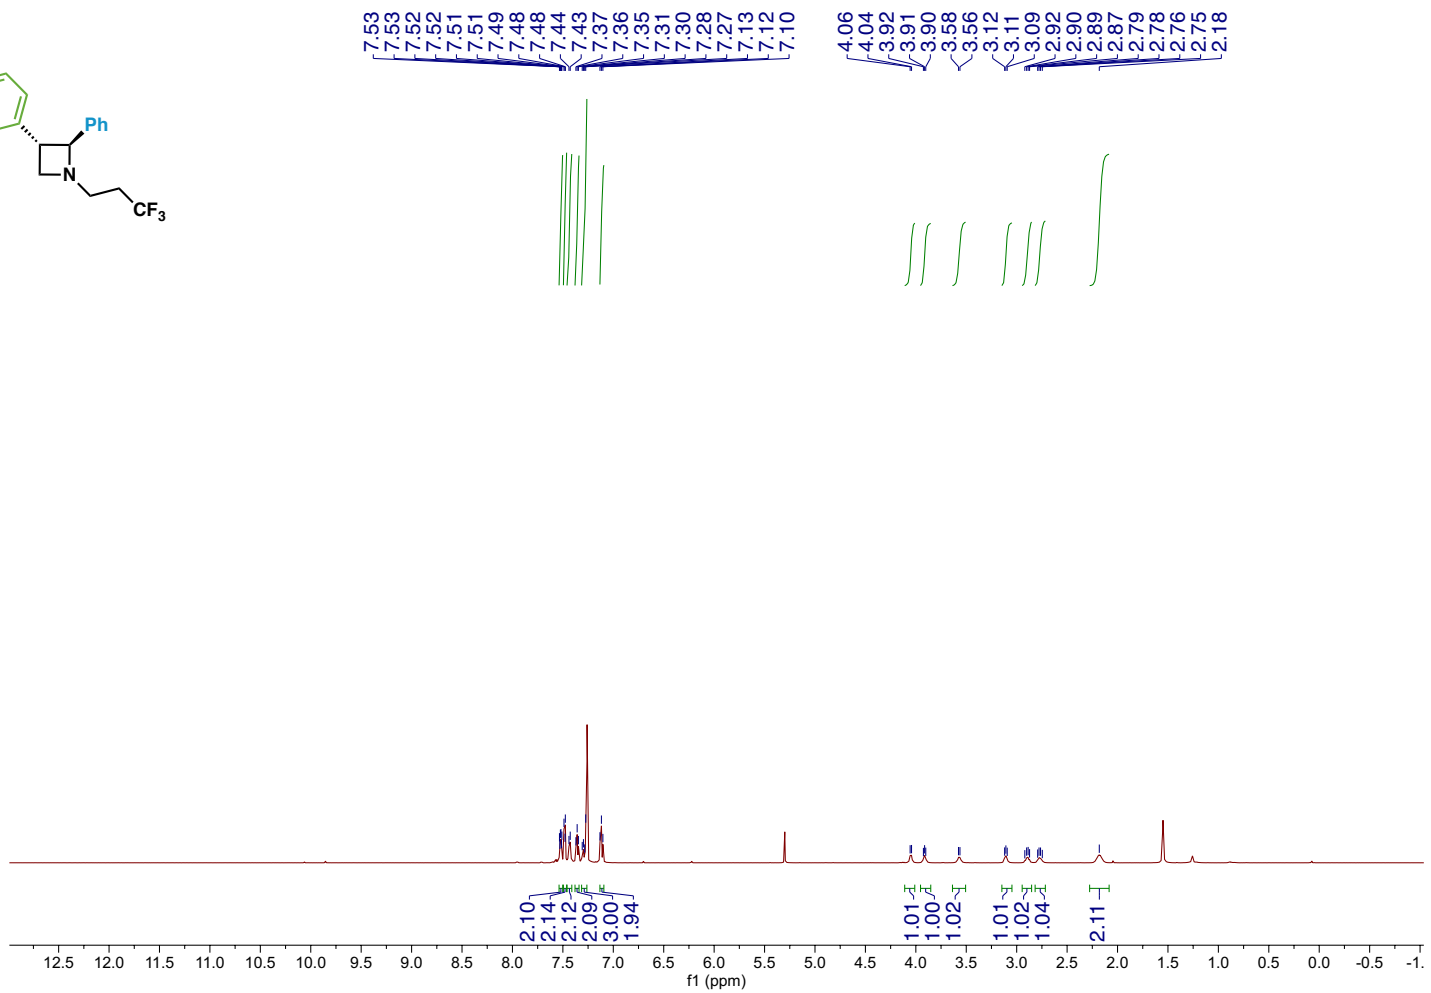

Compound 77 –  $^{19}\text{F}$  NMR

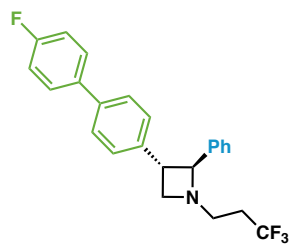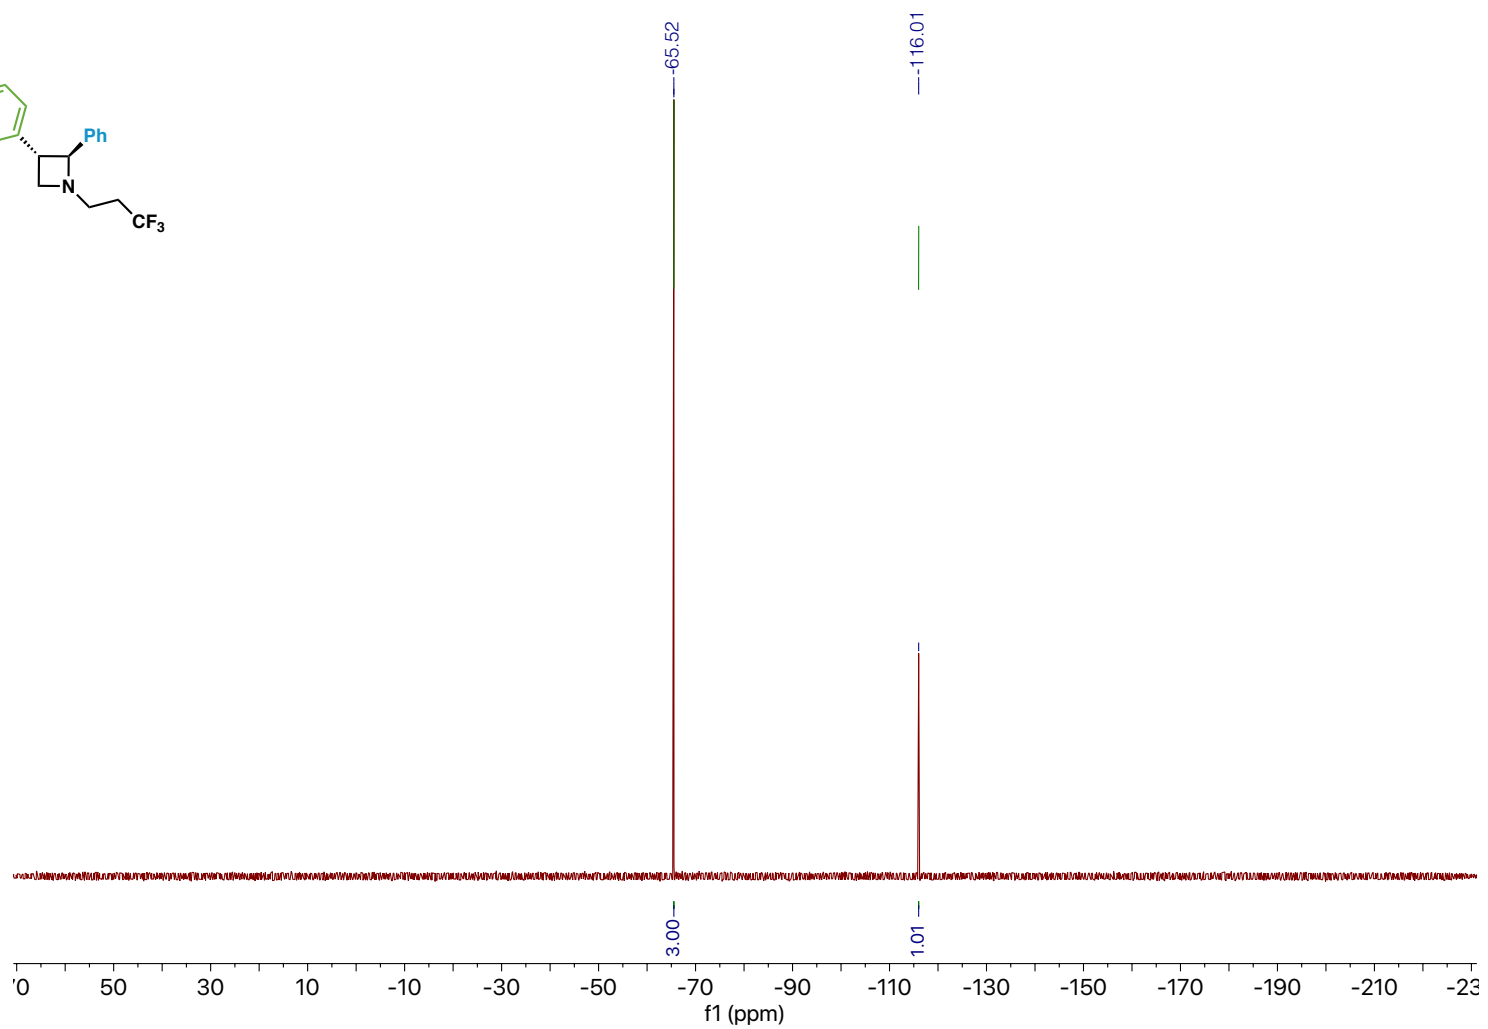

Compound 77 –  $^{13}\text{C}$  NMR

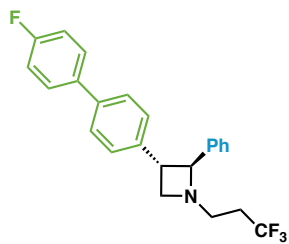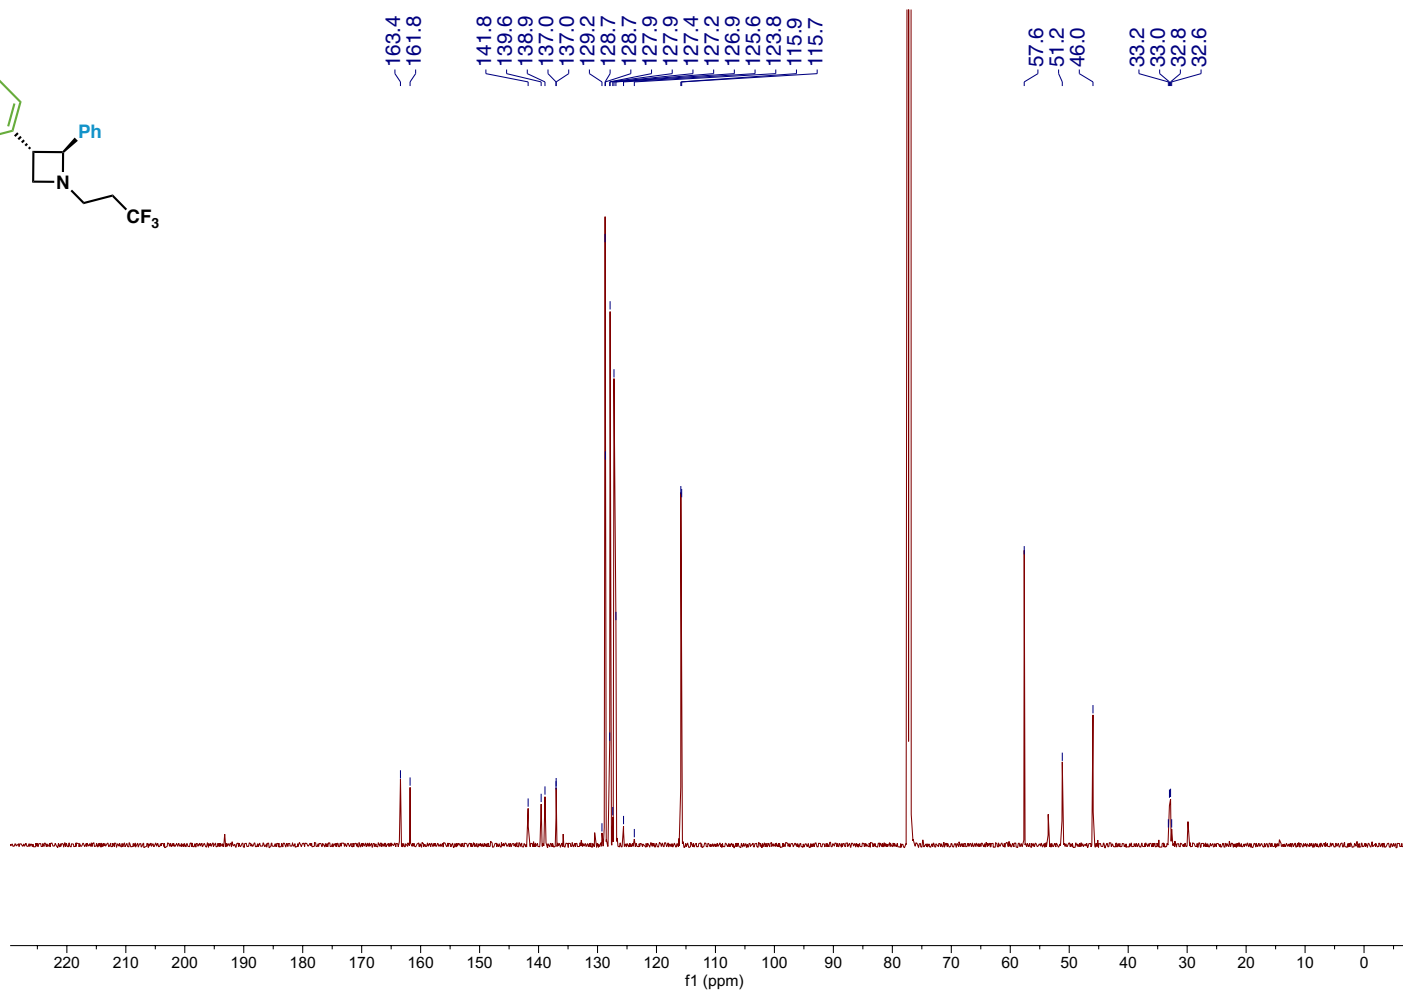

Compound SI-49 – <sup>1</sup>H NMR

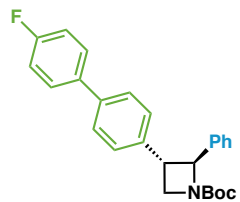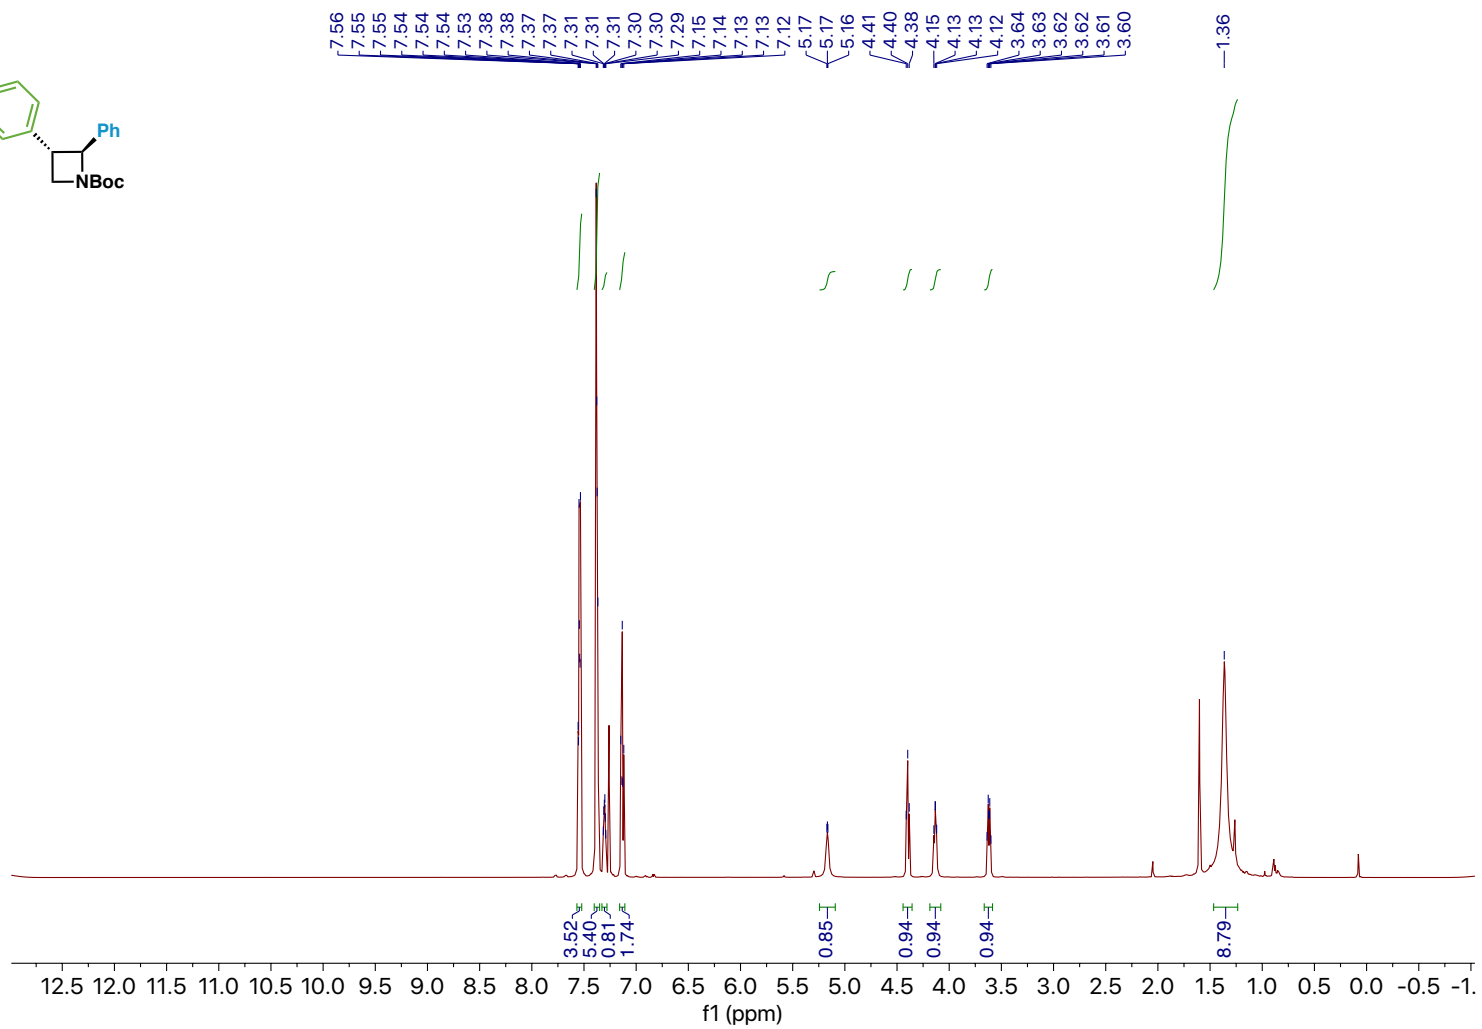

Compound SI-49 –  $^{19}\text{F}$  NMR

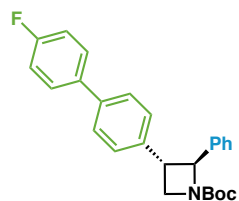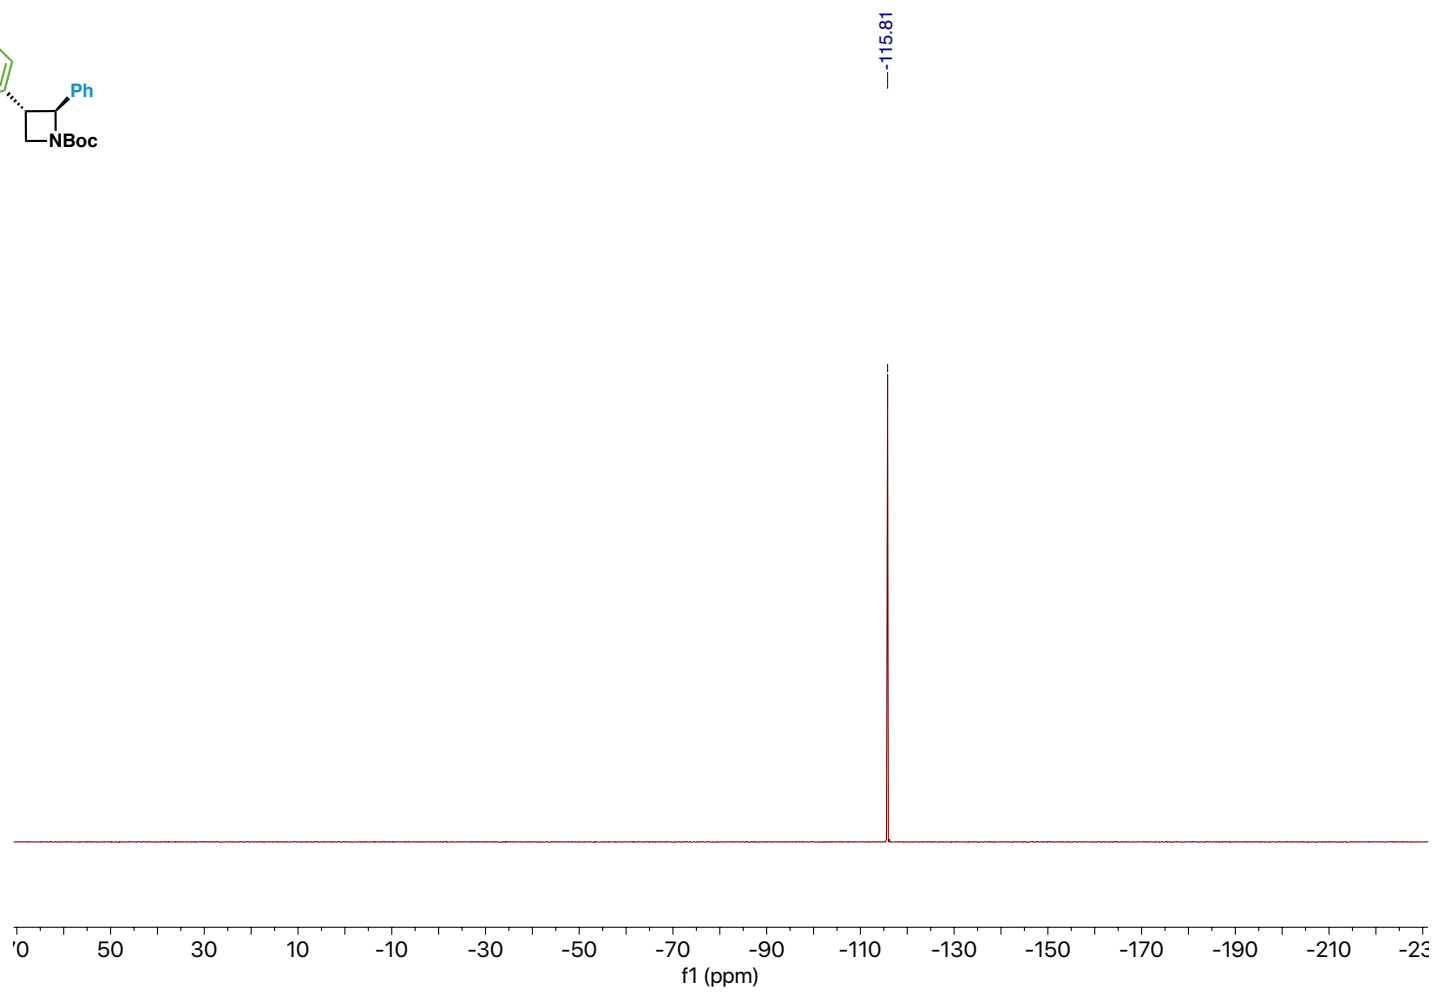



Compound SI-49 – <sup>13</sup>C NMR

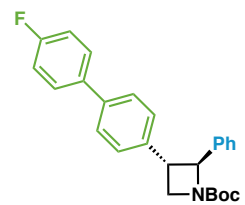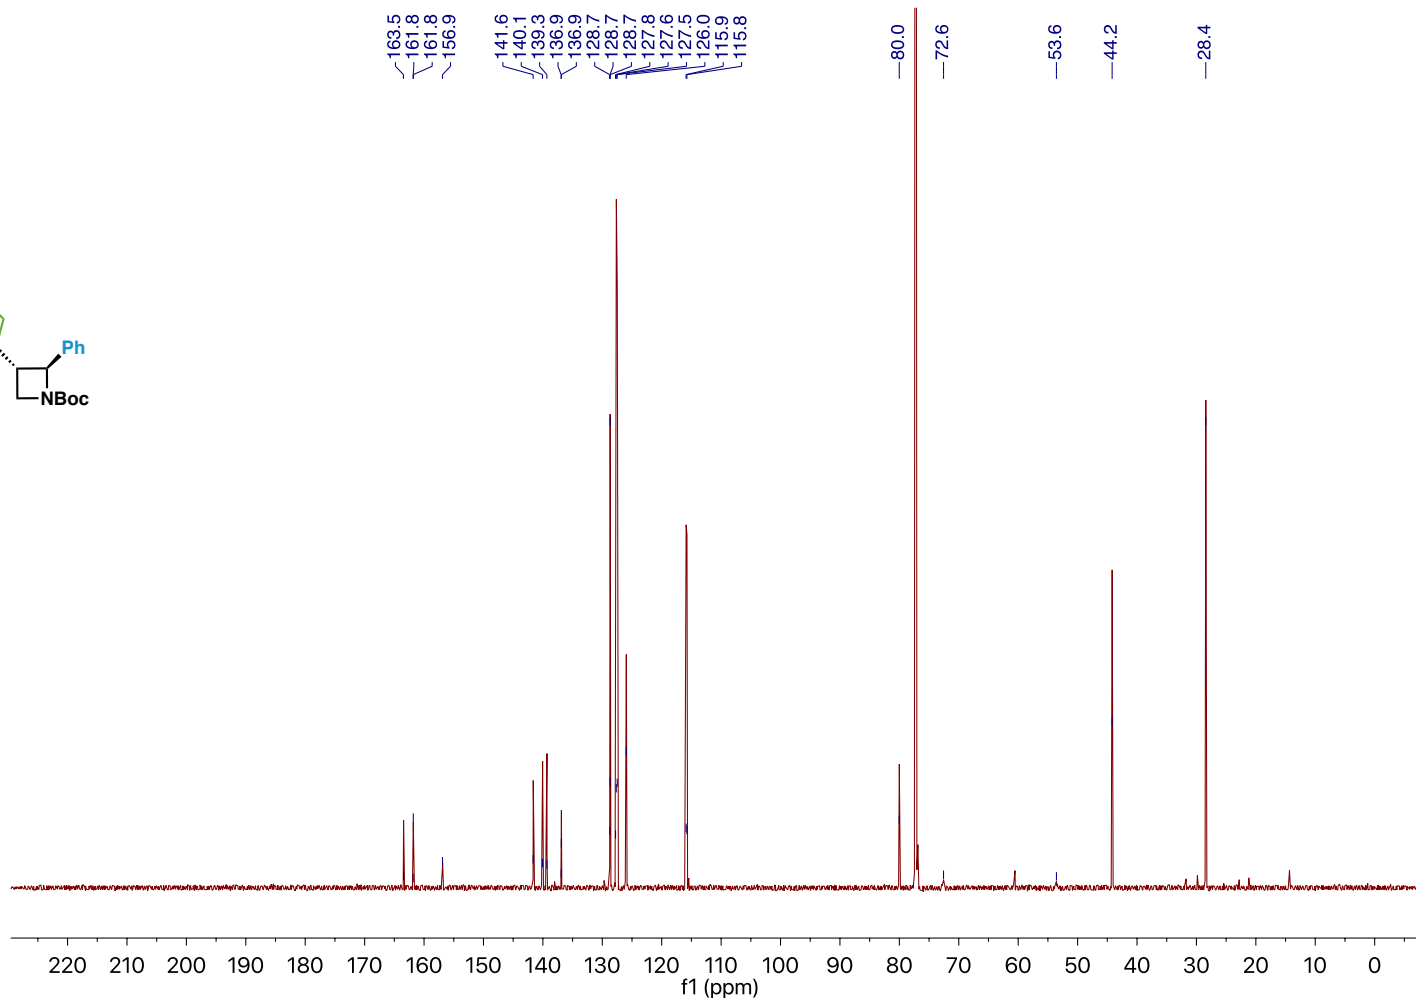

Compound 78 – <sup>1</sup>H NMR

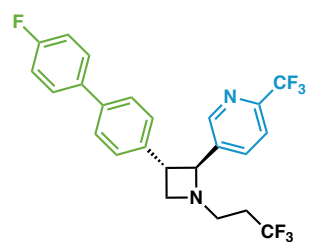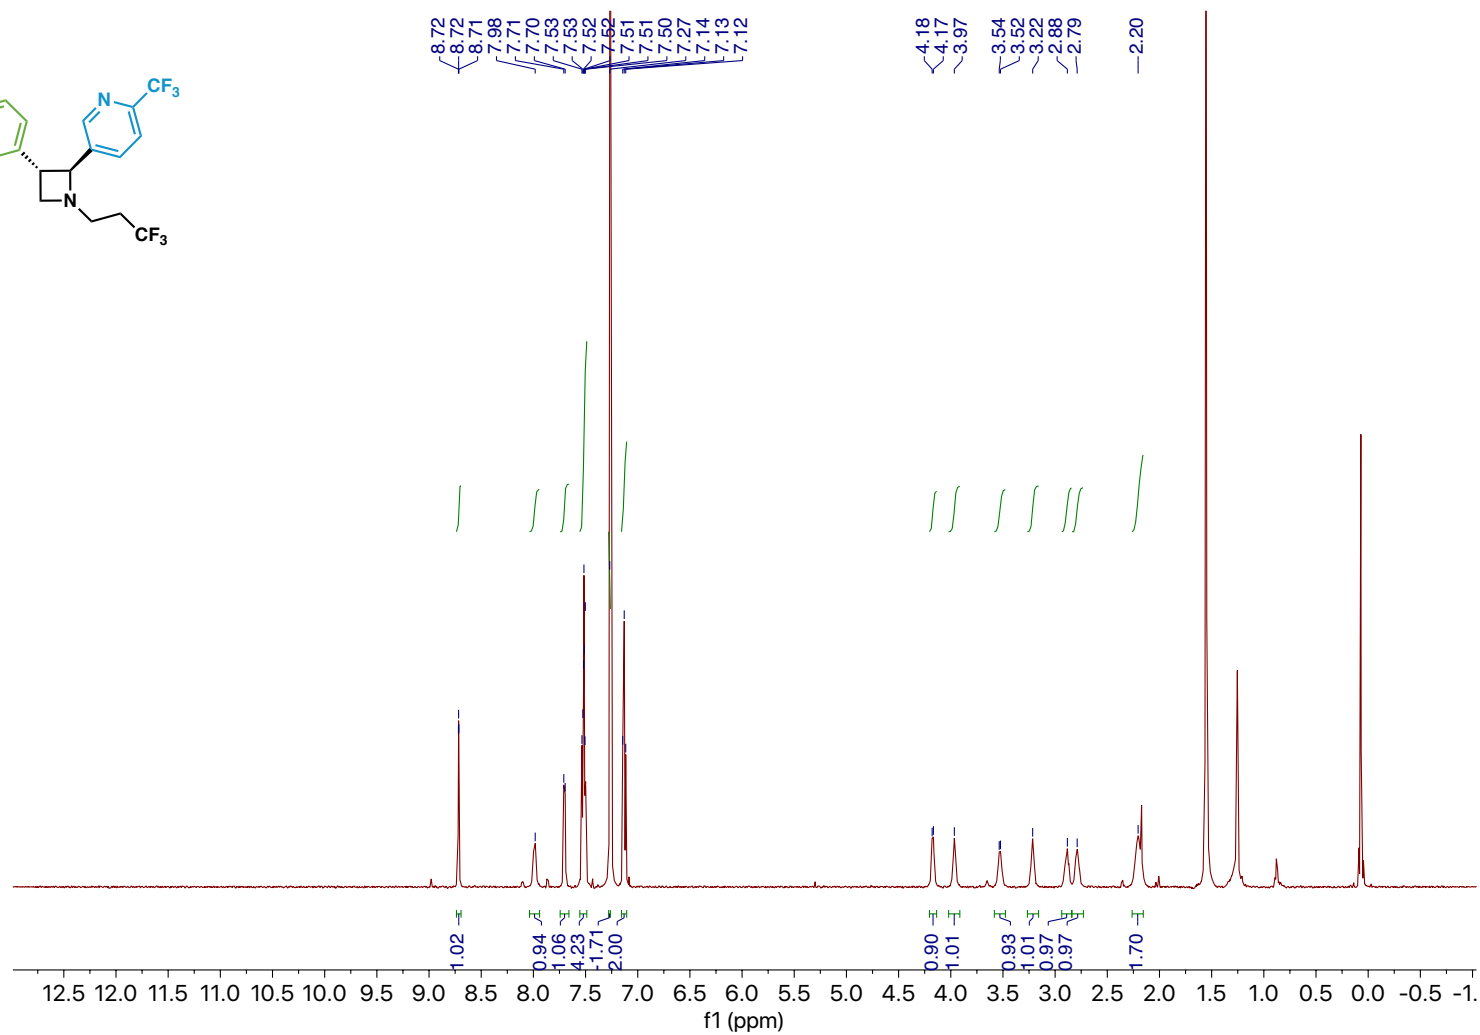

(Expanded region of compound 78 – <sup>1</sup>H NMR)

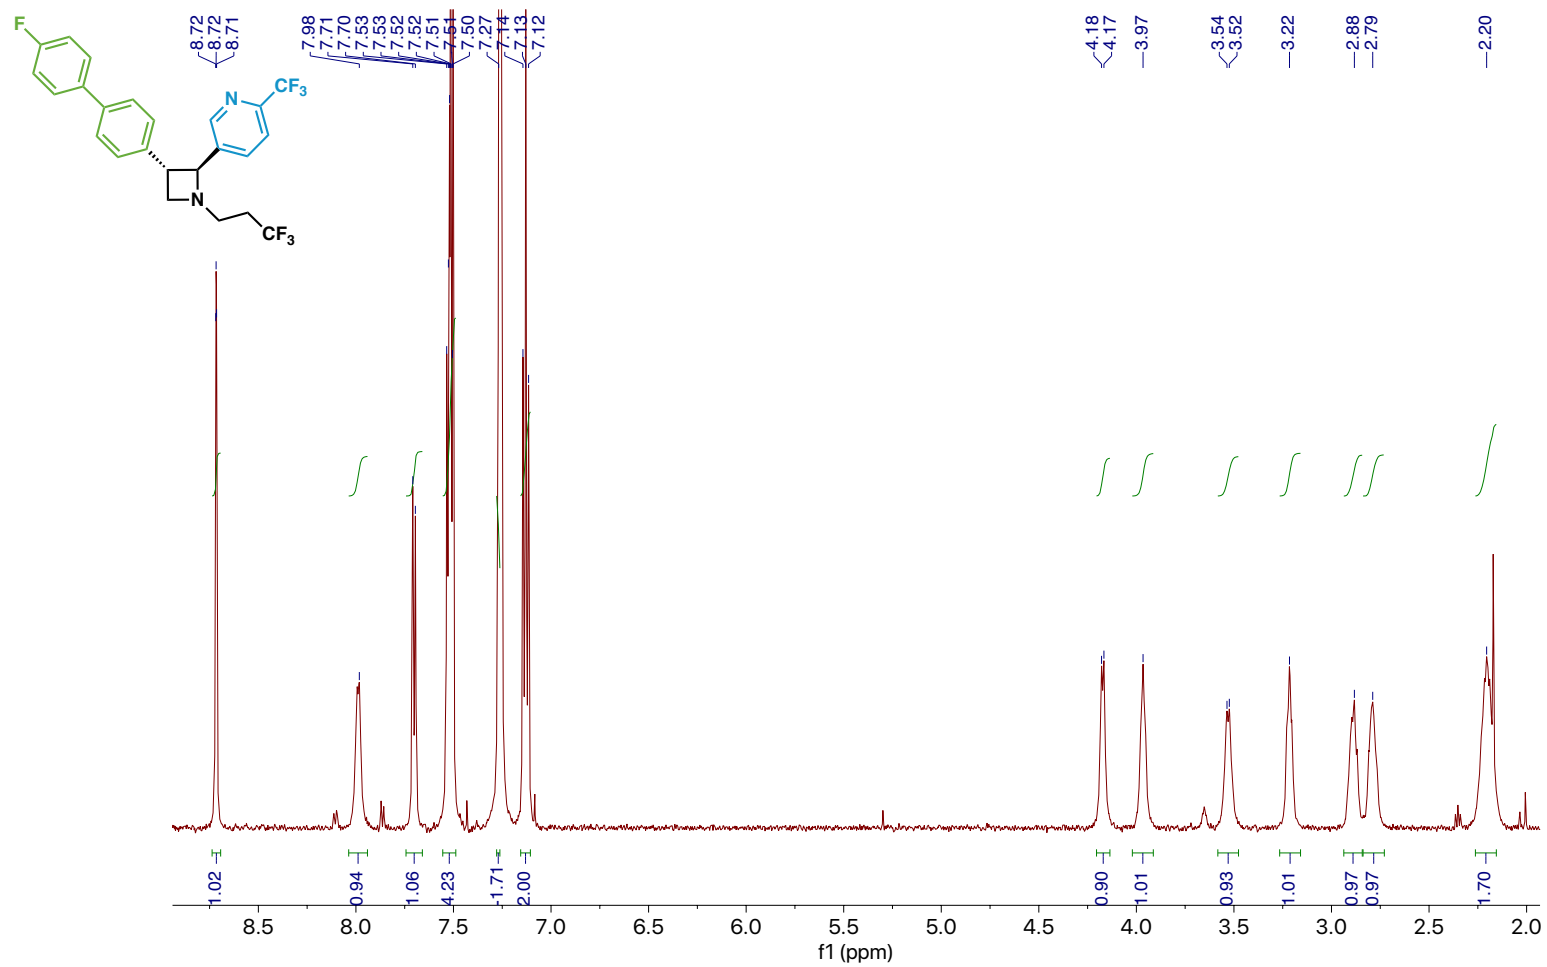

Compound 78 –  $^{19}\text{F}$  NMR

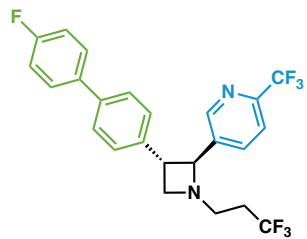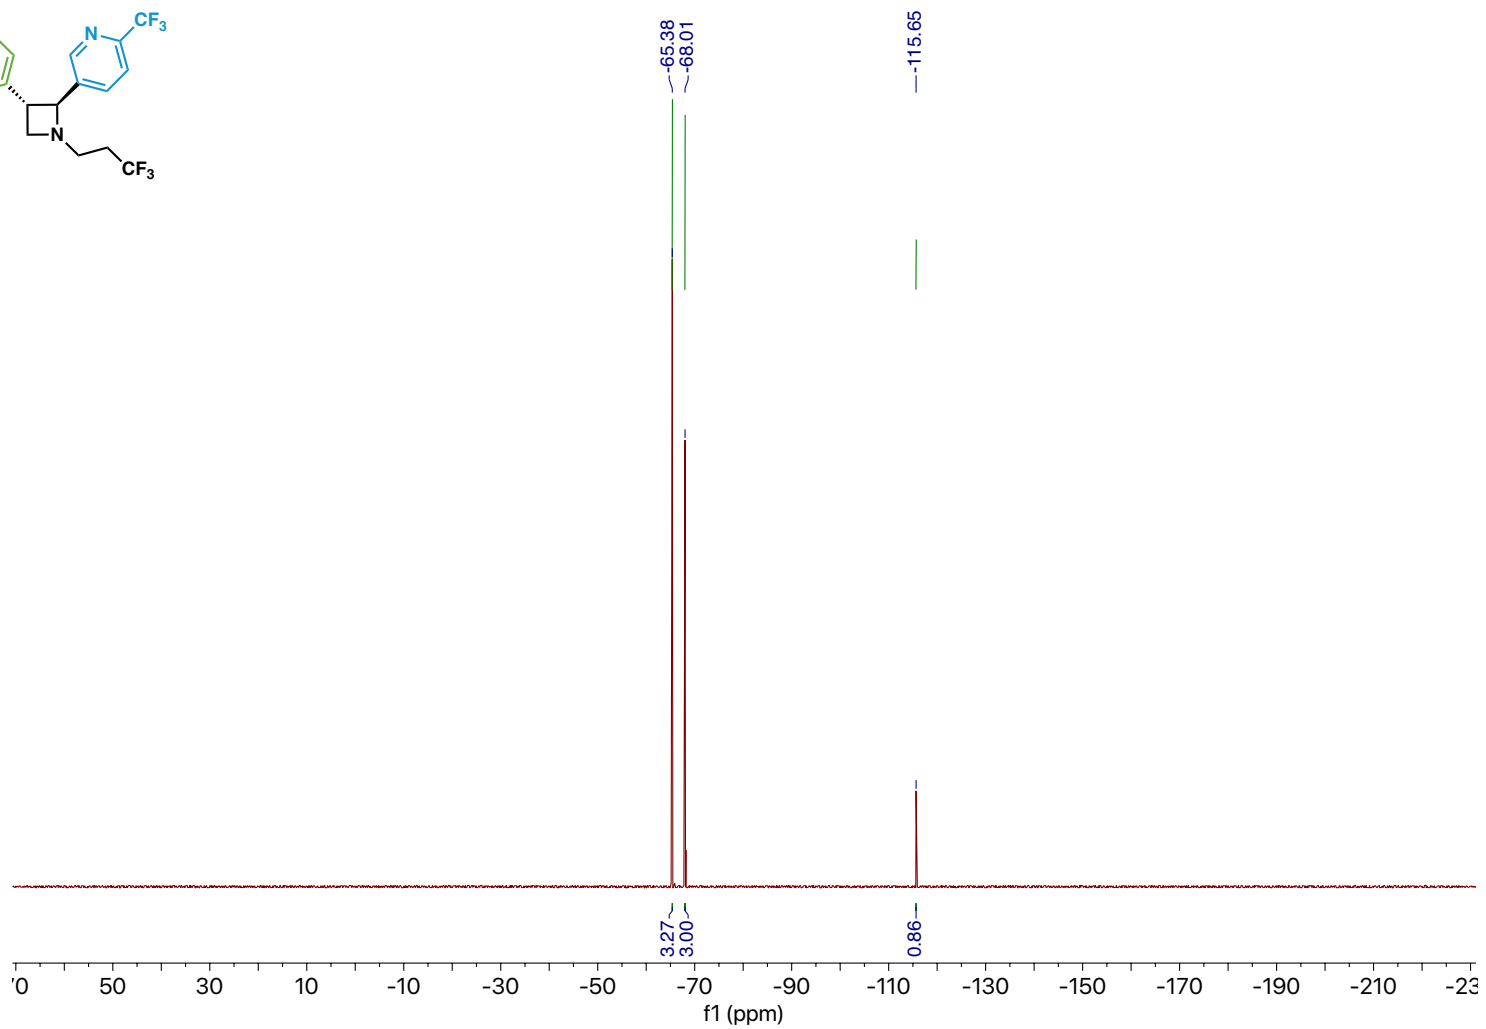

Compound 78 –  $^{13}\text{C}$  NMR

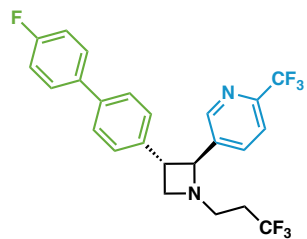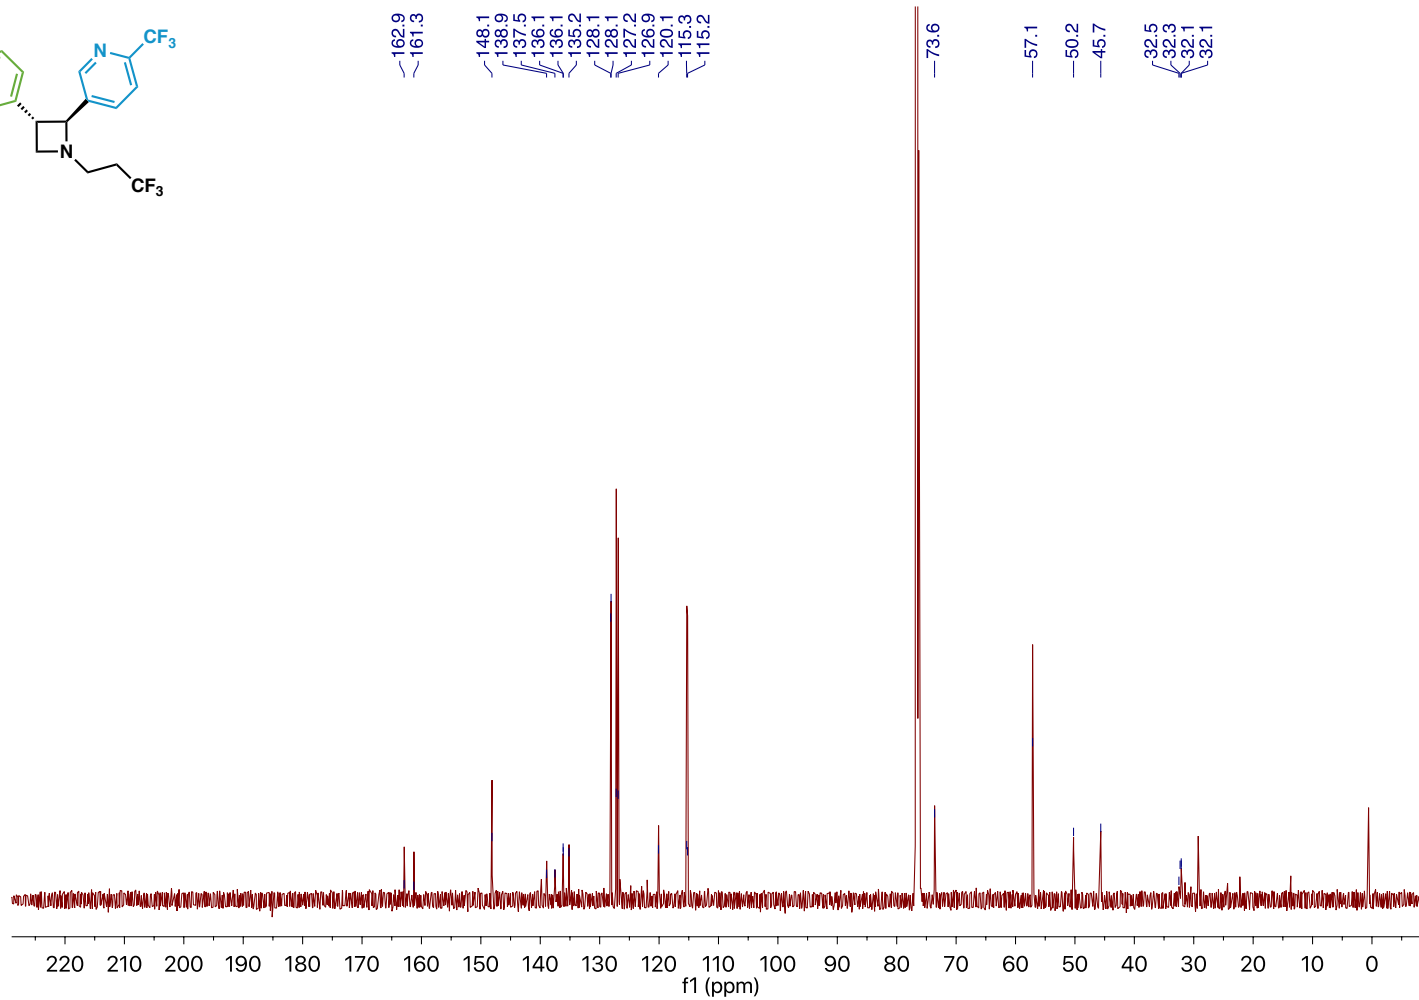

Compound 78 – HSQC

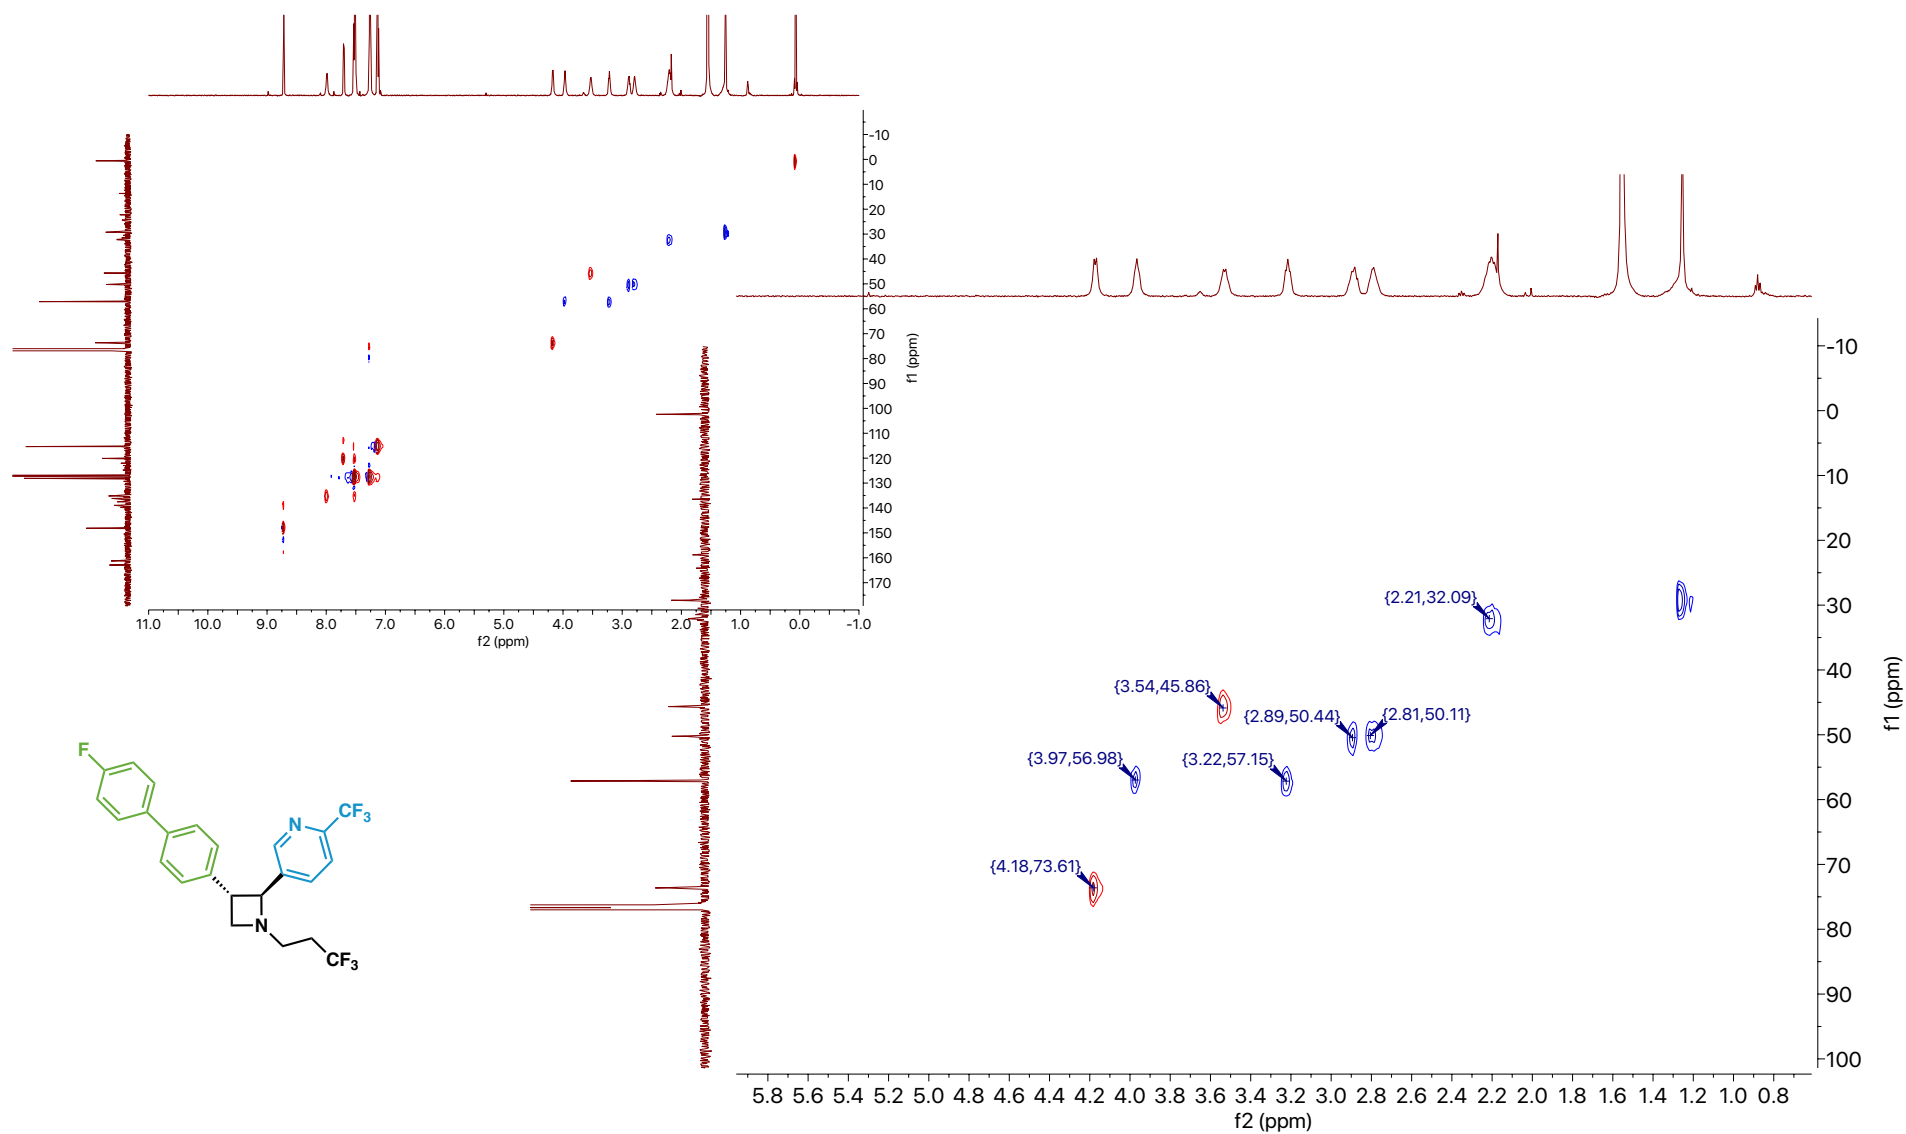

Compound SI-50 – <sup>1</sup>H NMR

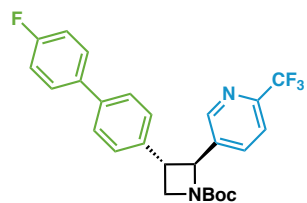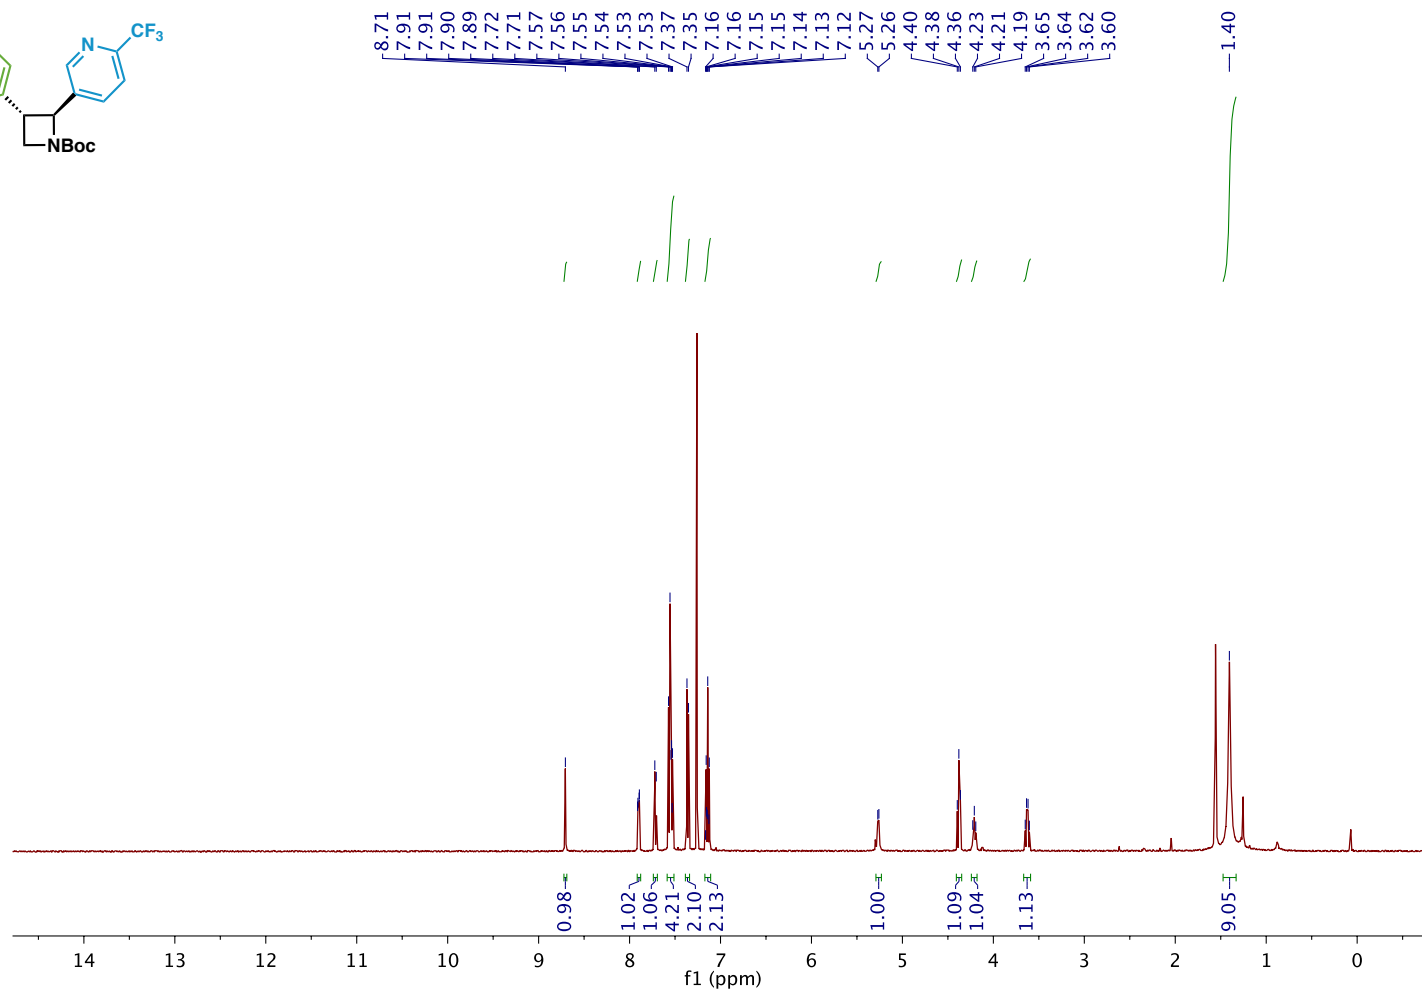

Compound SI-50 – <sup>19</sup>F NMR

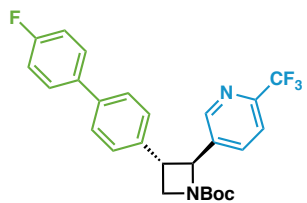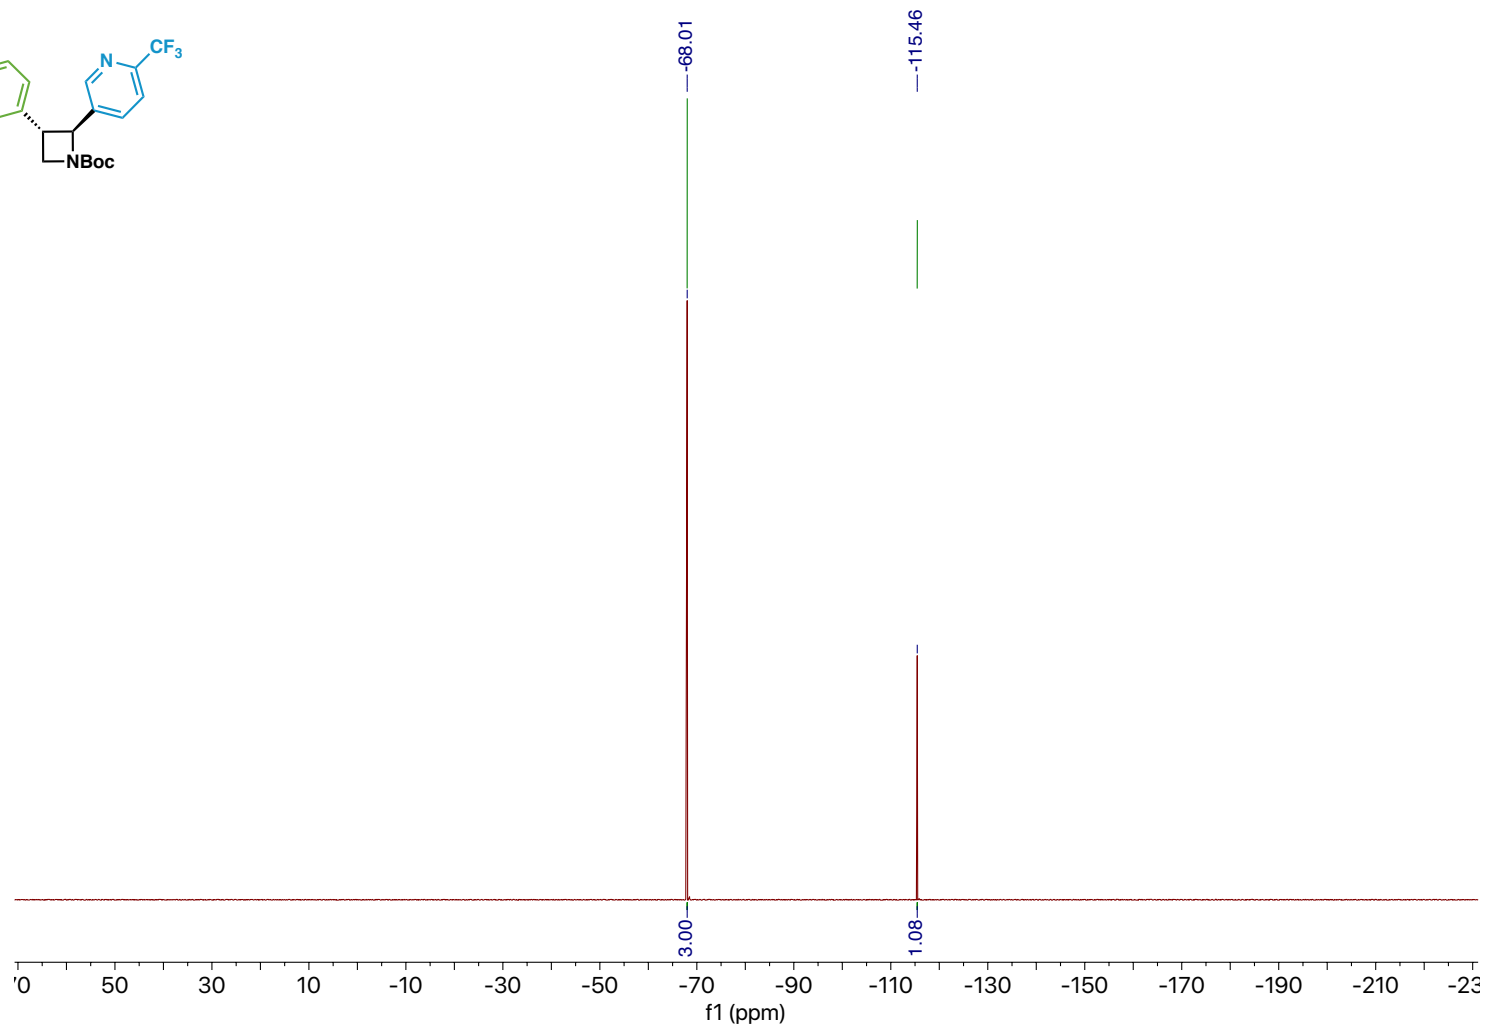



Compound SI-50 – <sup>13</sup>C NMR

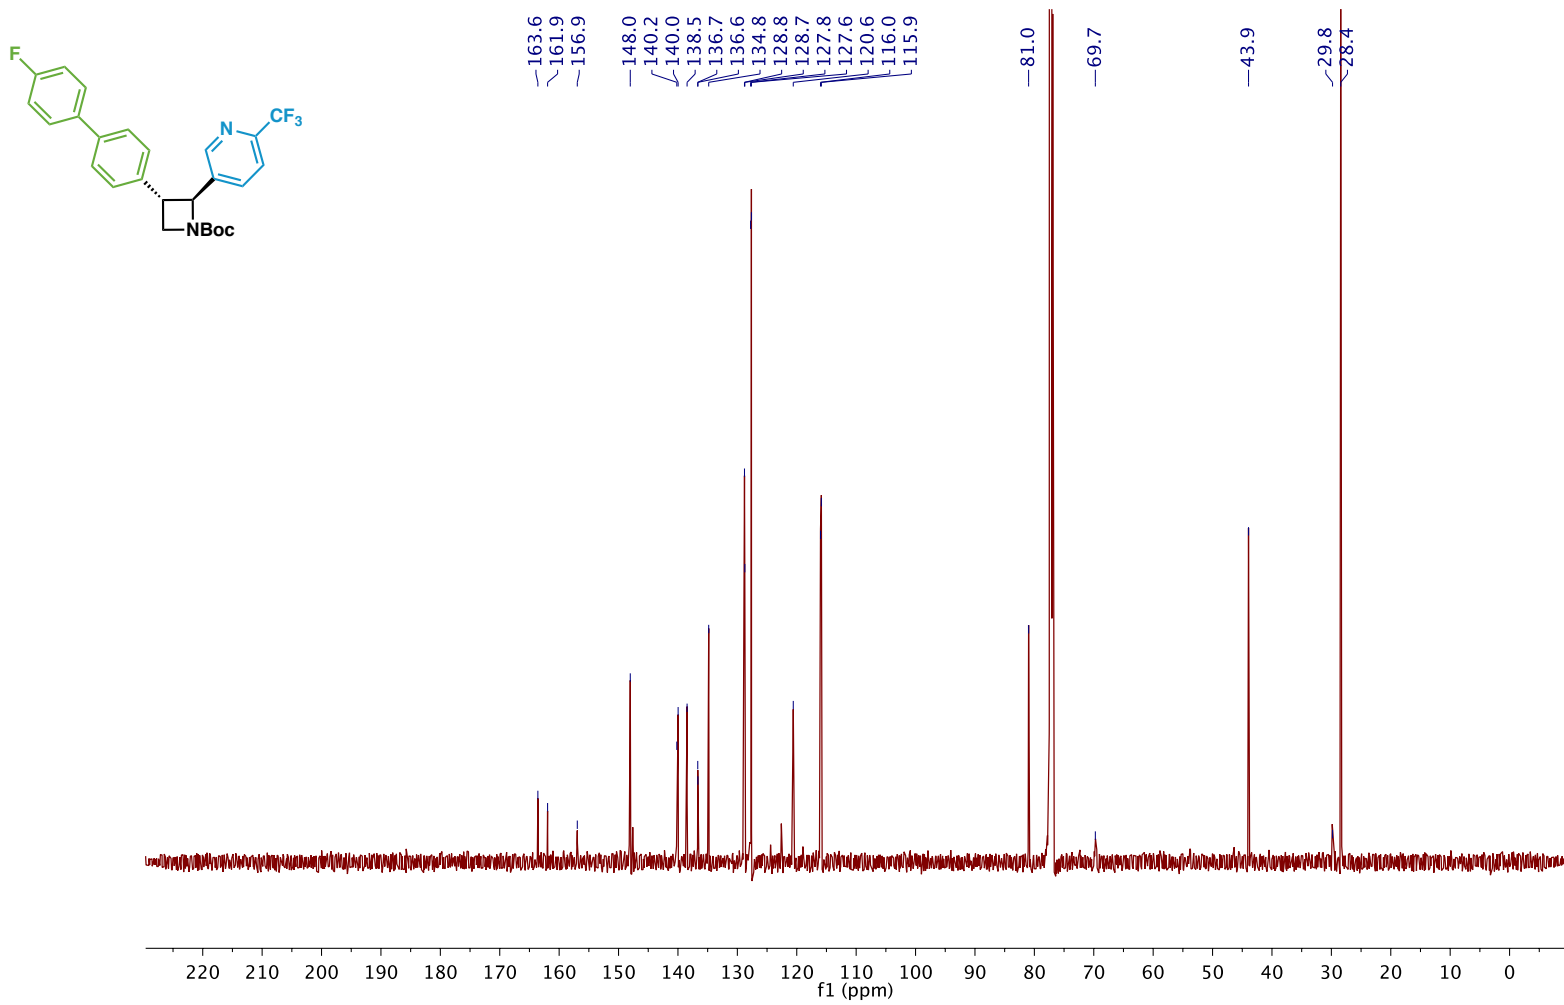

Compound 80 – <sup>1</sup>H NMR

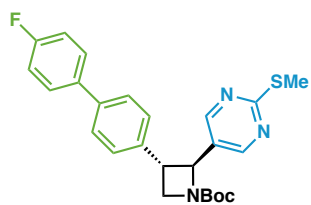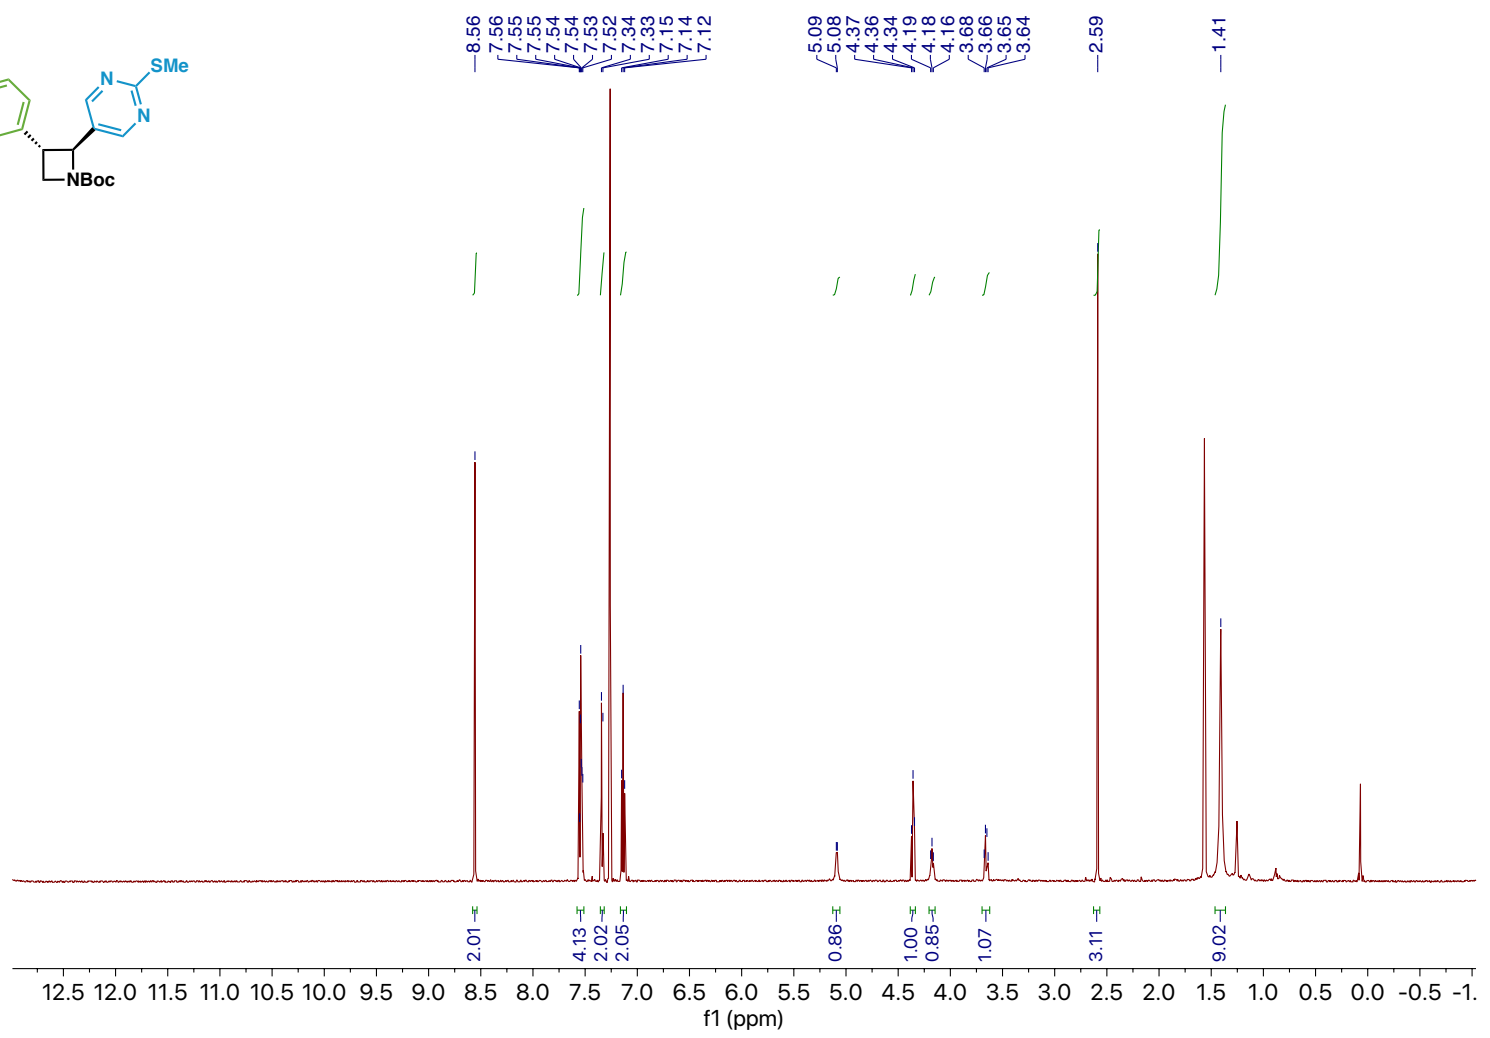

Compound 80 –  $^{19}\text{F}$  NMR

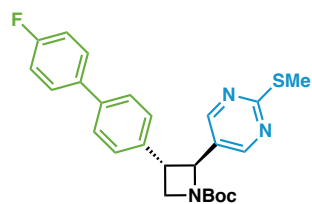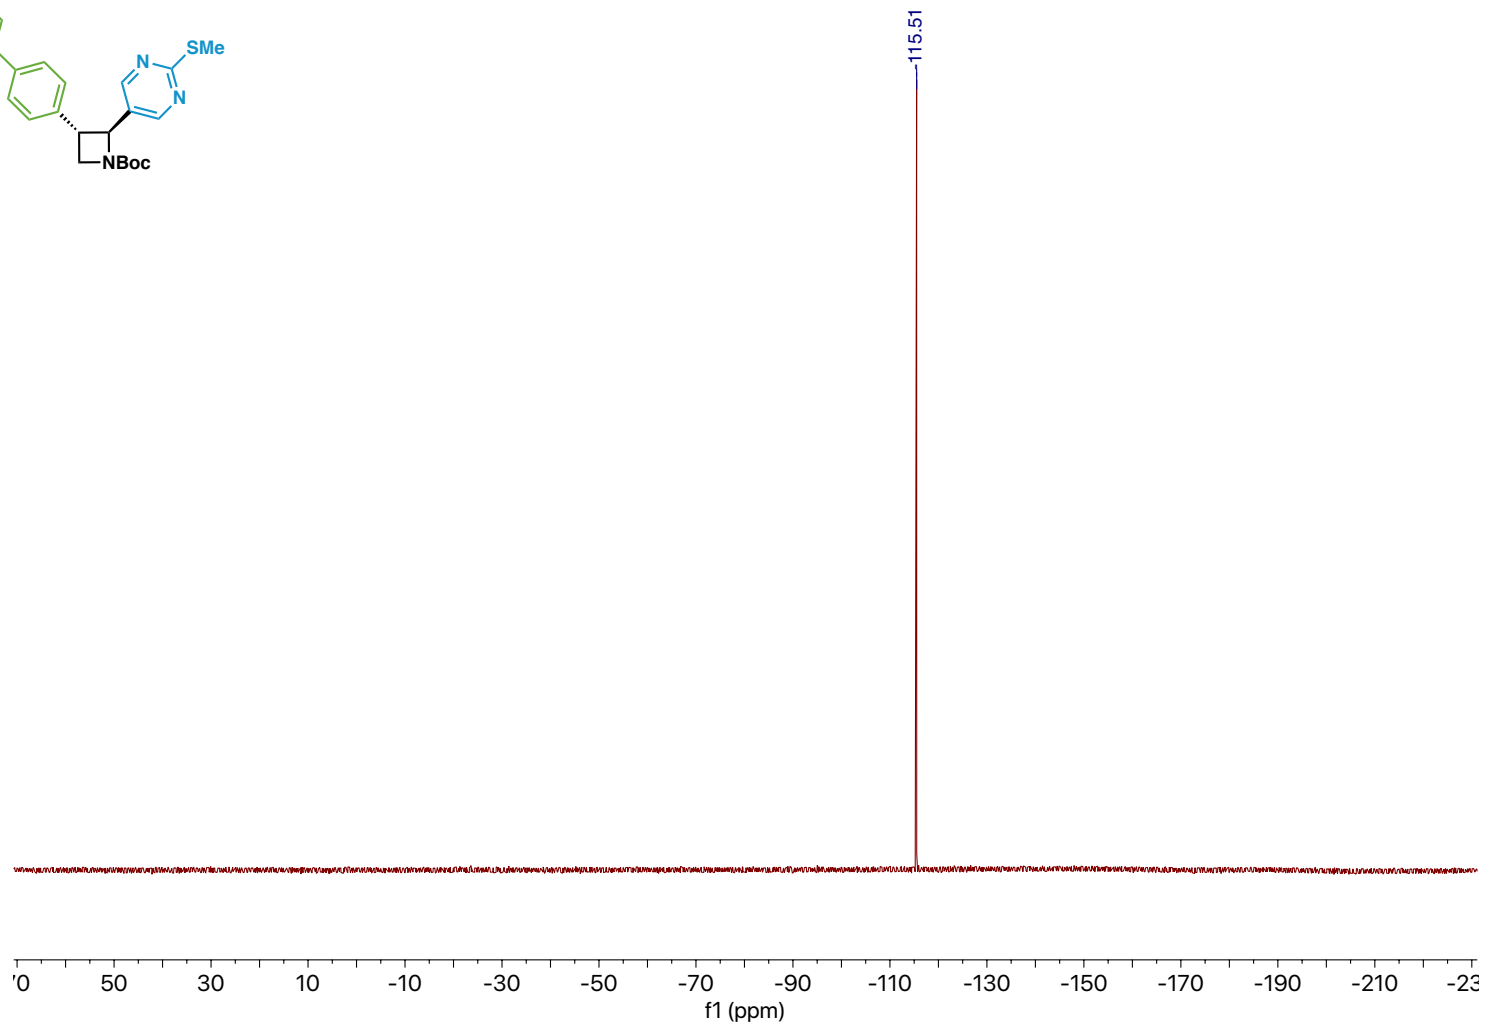

S475

Compound 80 – <sup>13</sup>C NMR

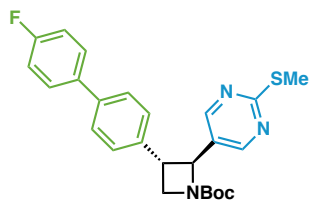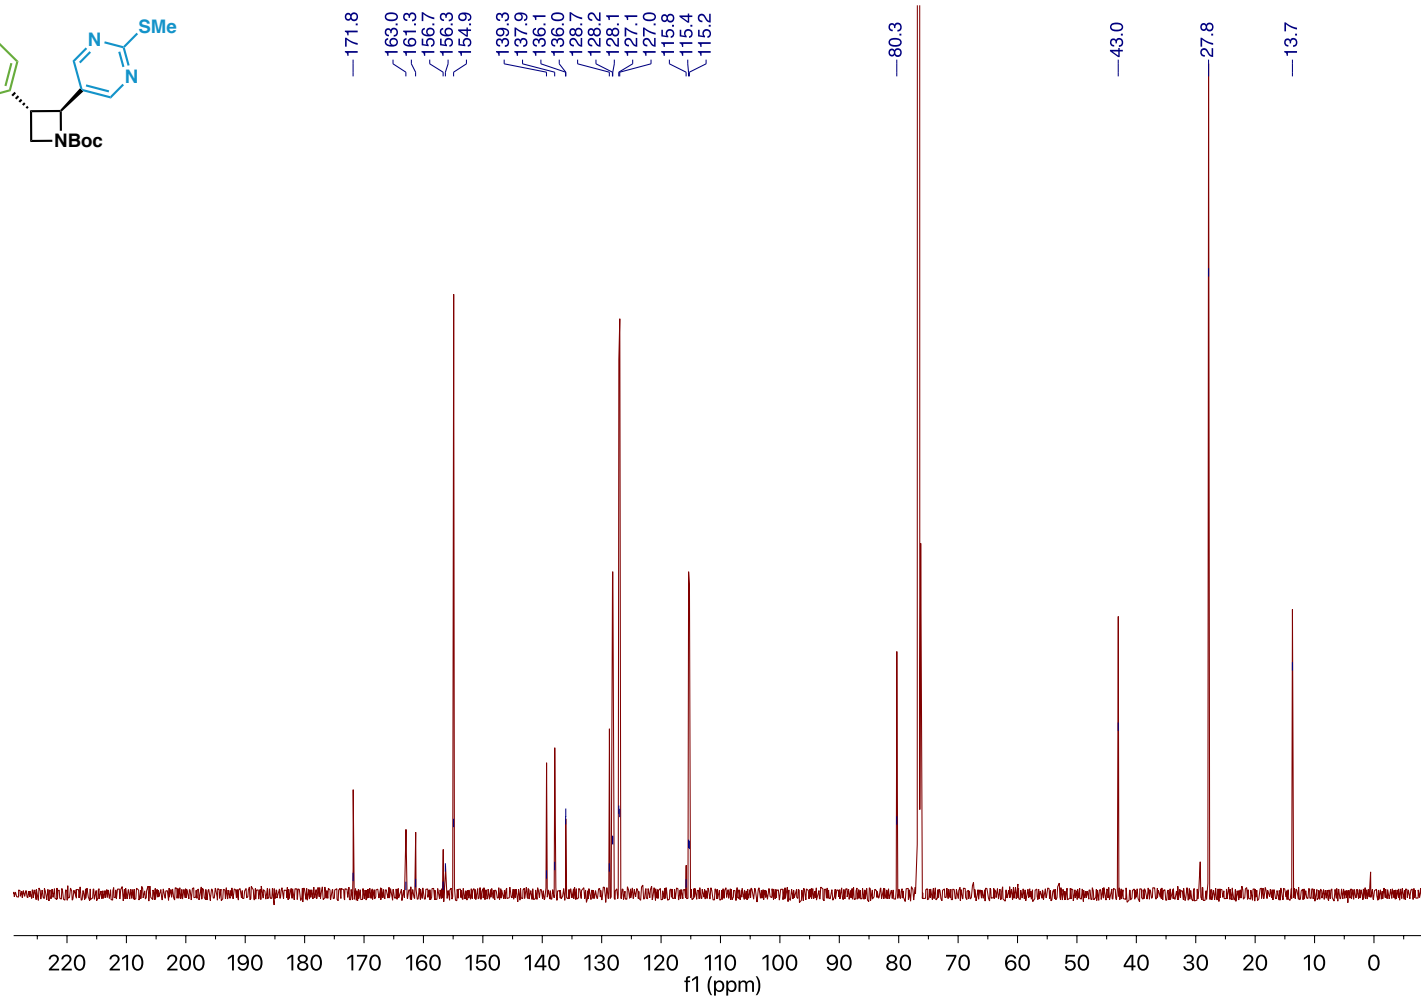

Compound 79- <sup>1</sup>H NMR

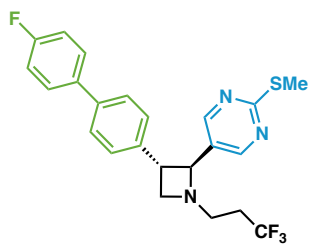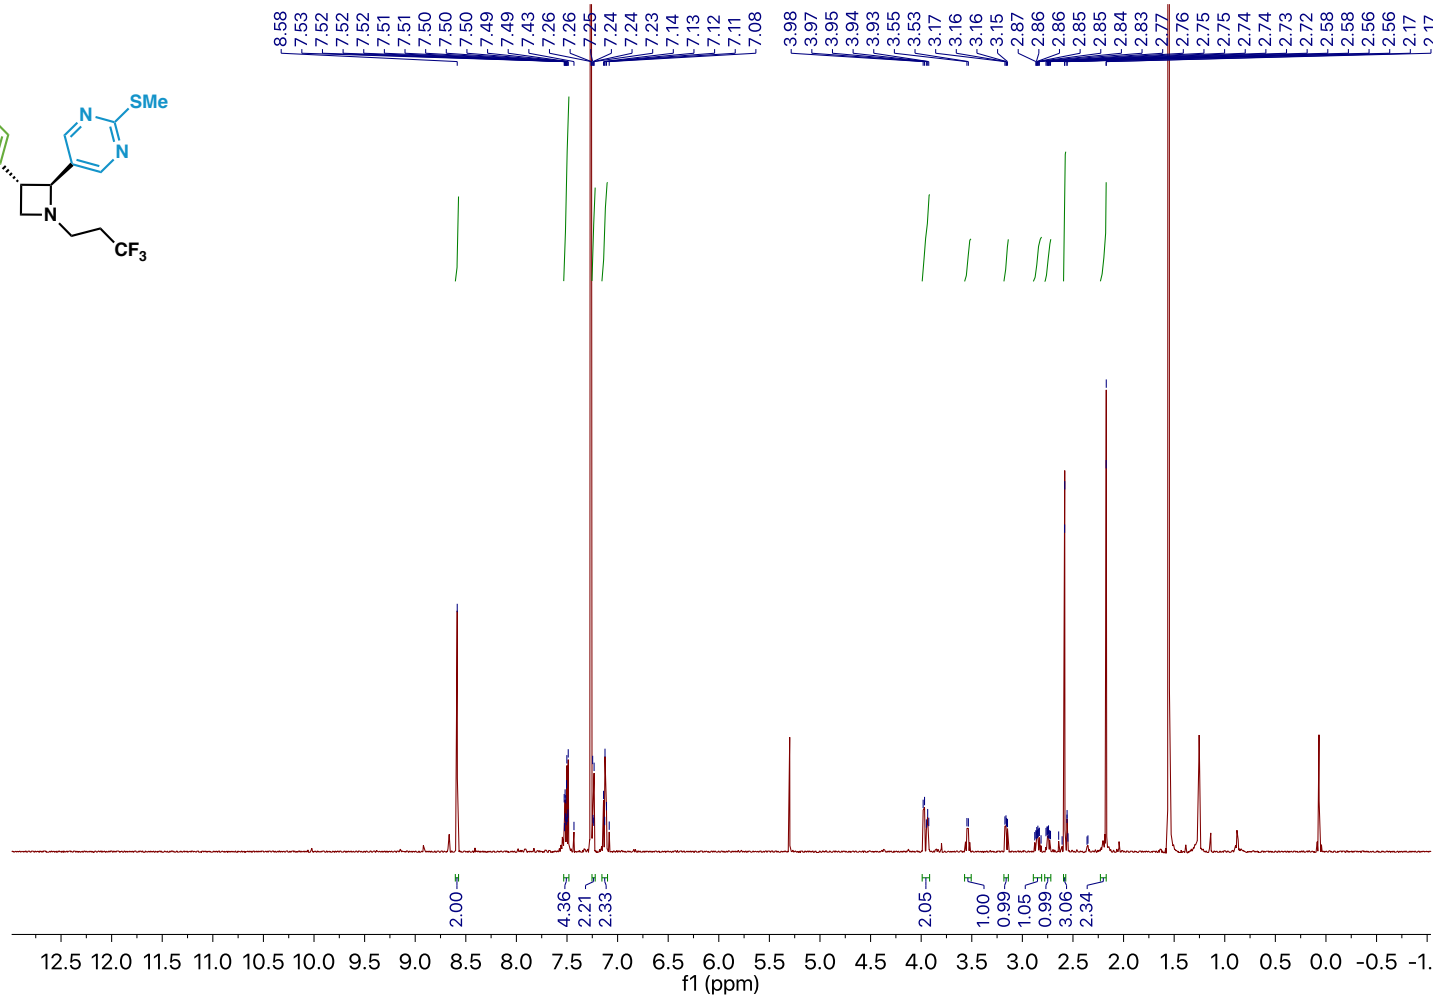

Compound 79 – <sup>19</sup>F NMR

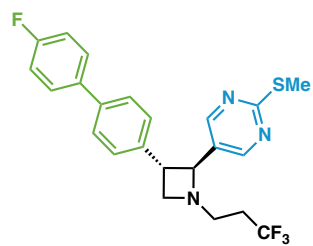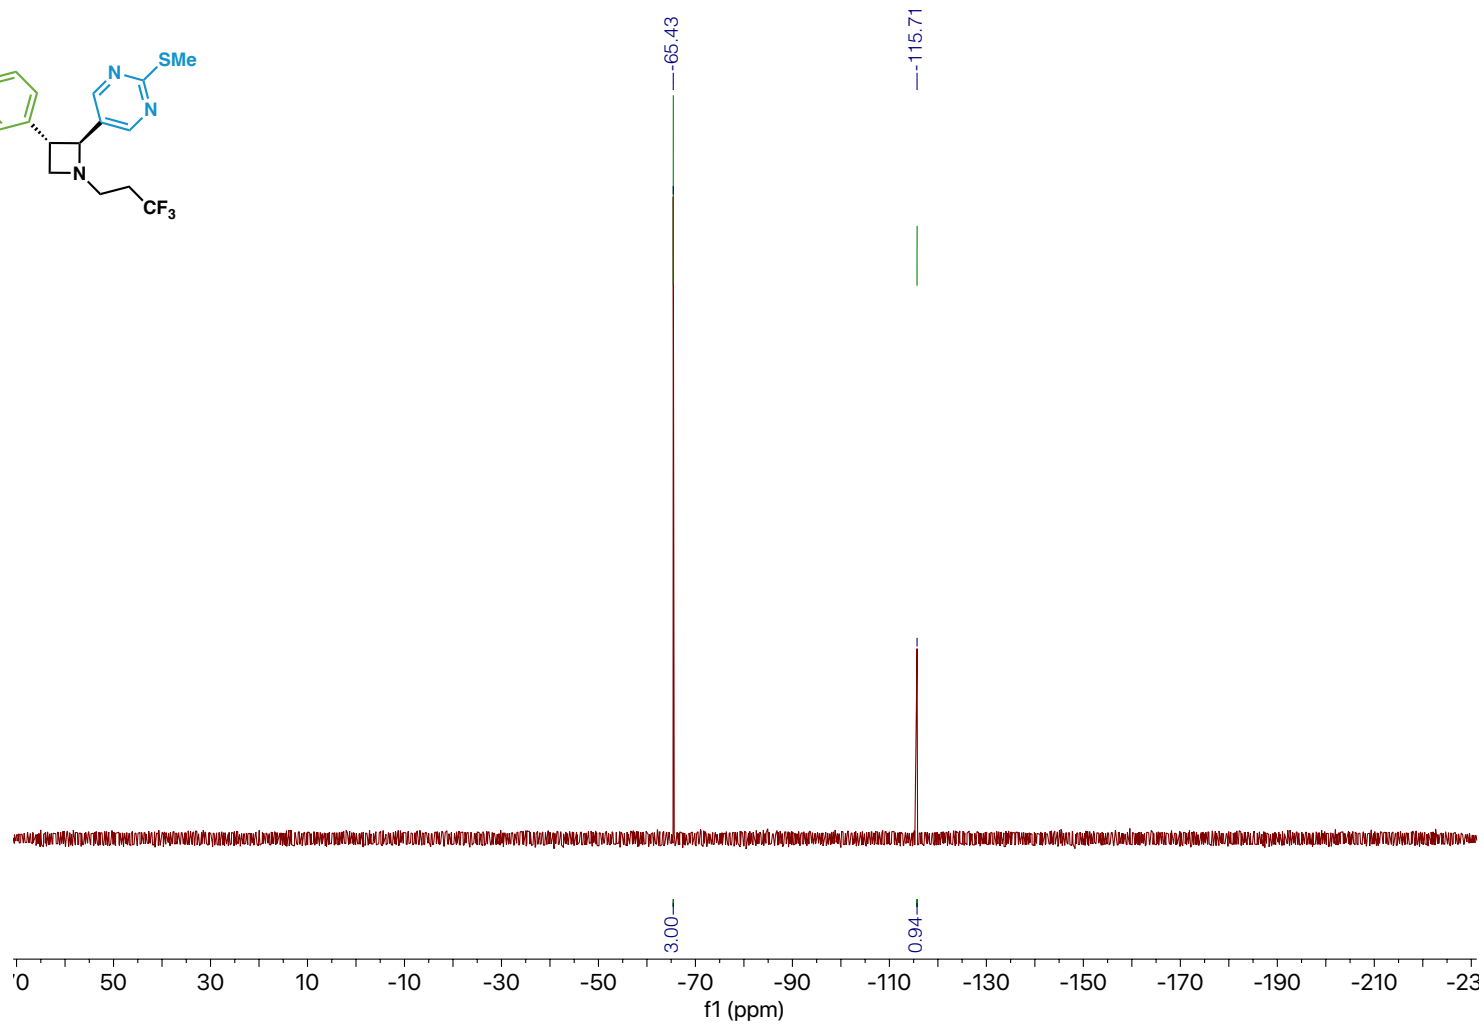

Compound 81 – <sup>1</sup>H NMR

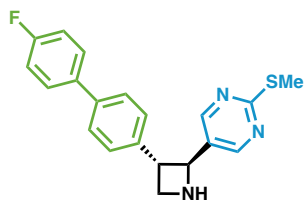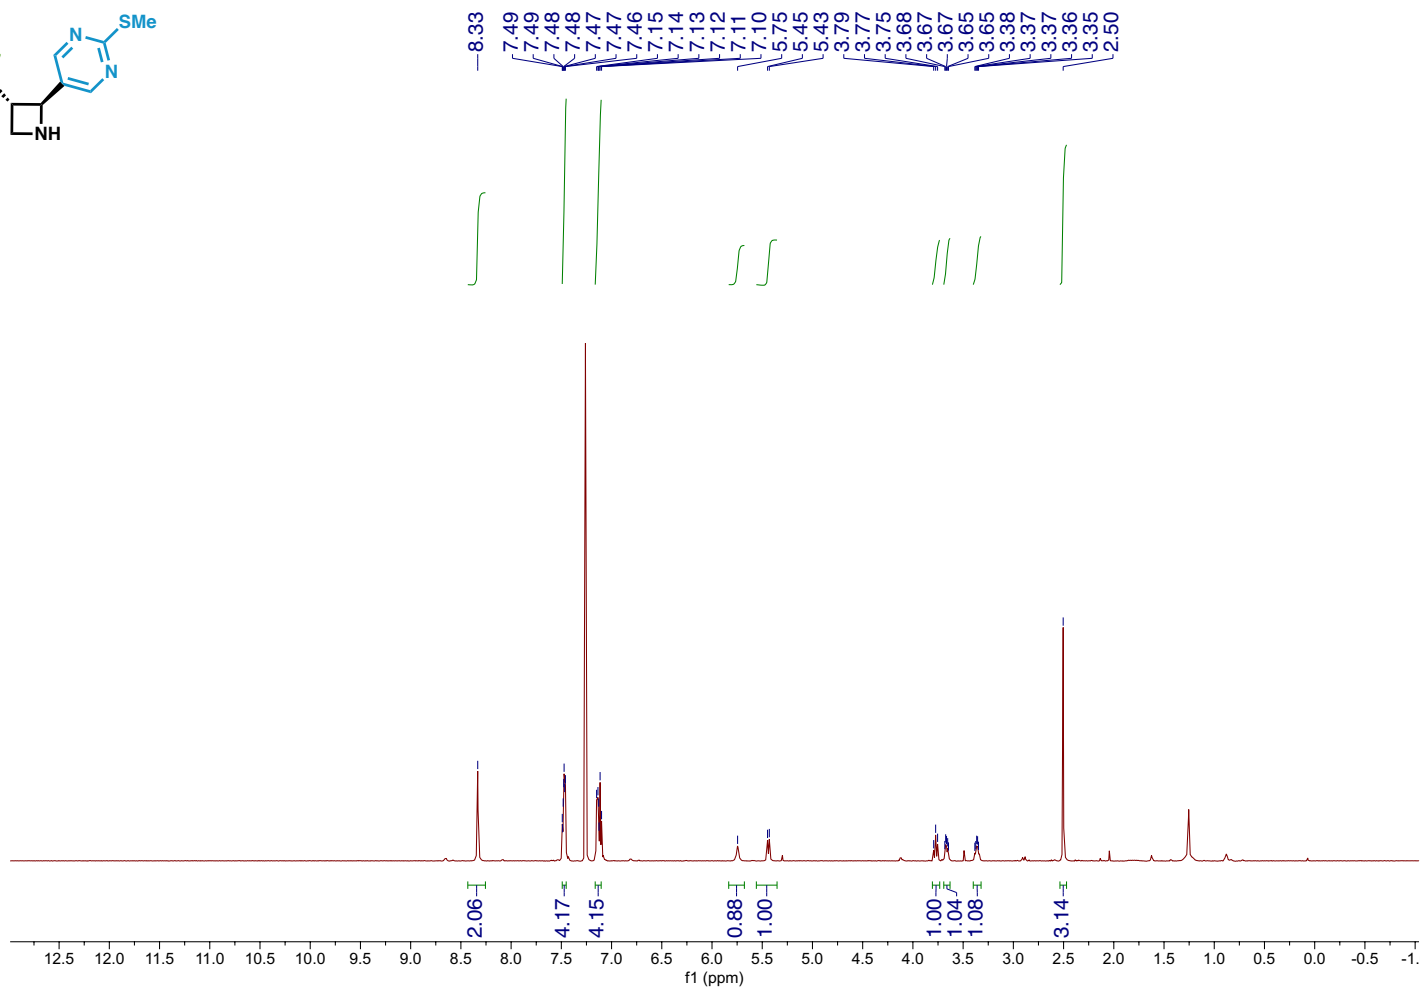

Compound 81 –  $^{19}\text{F}$  NMR

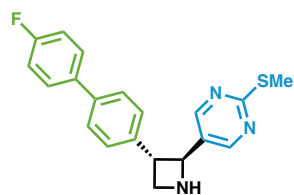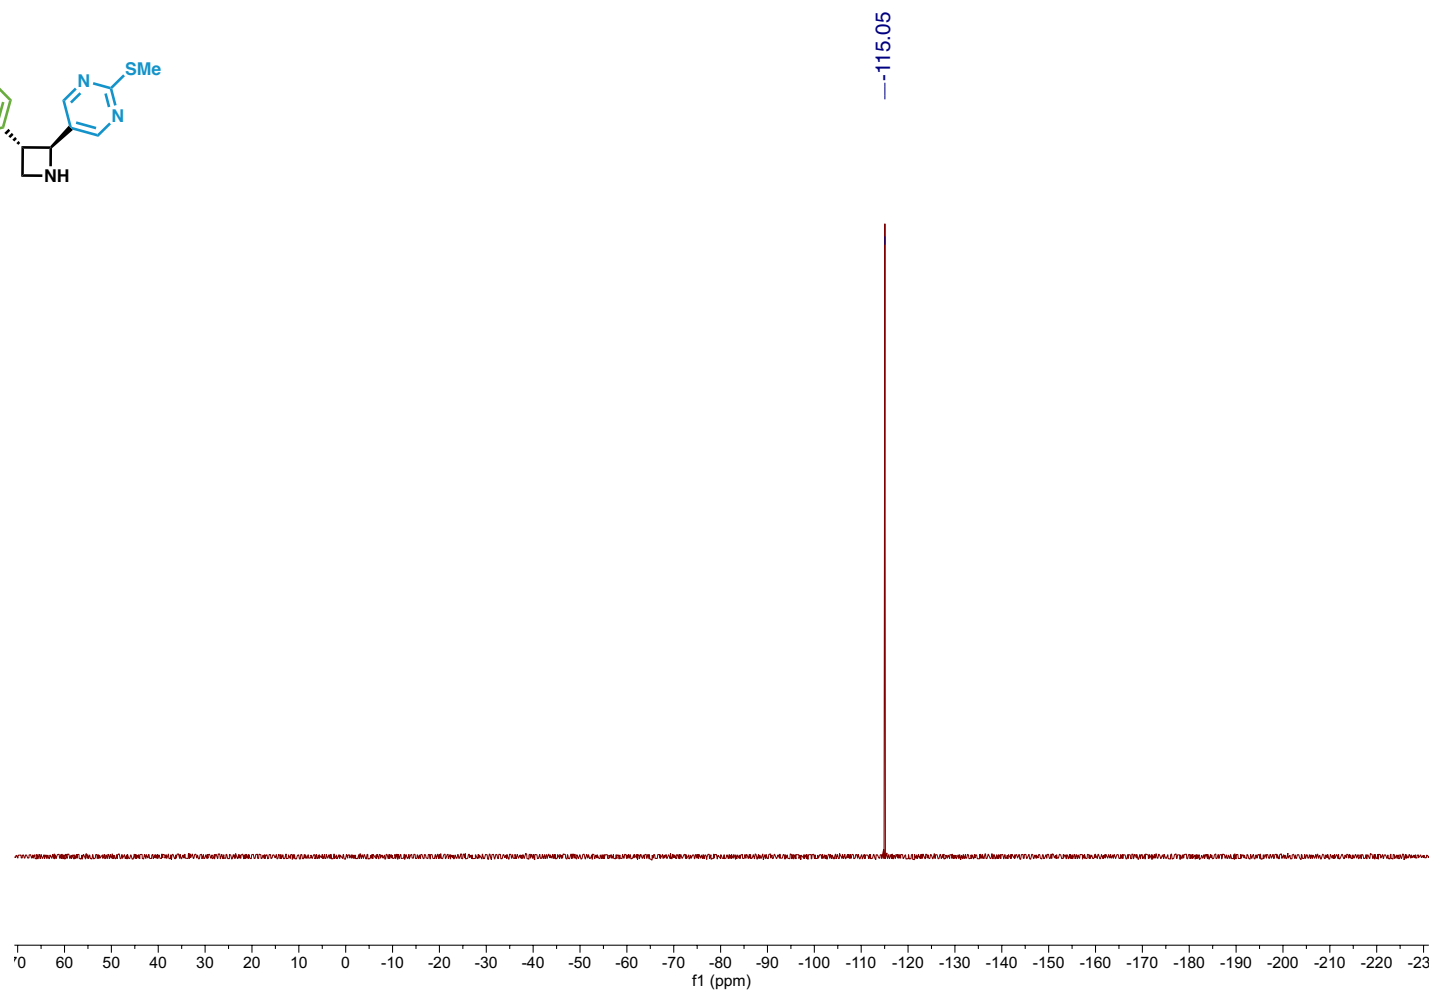



Compound 81 -  $^{13}\text{C}$  NMR

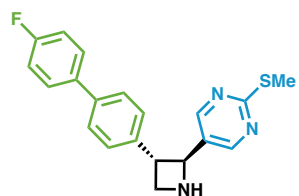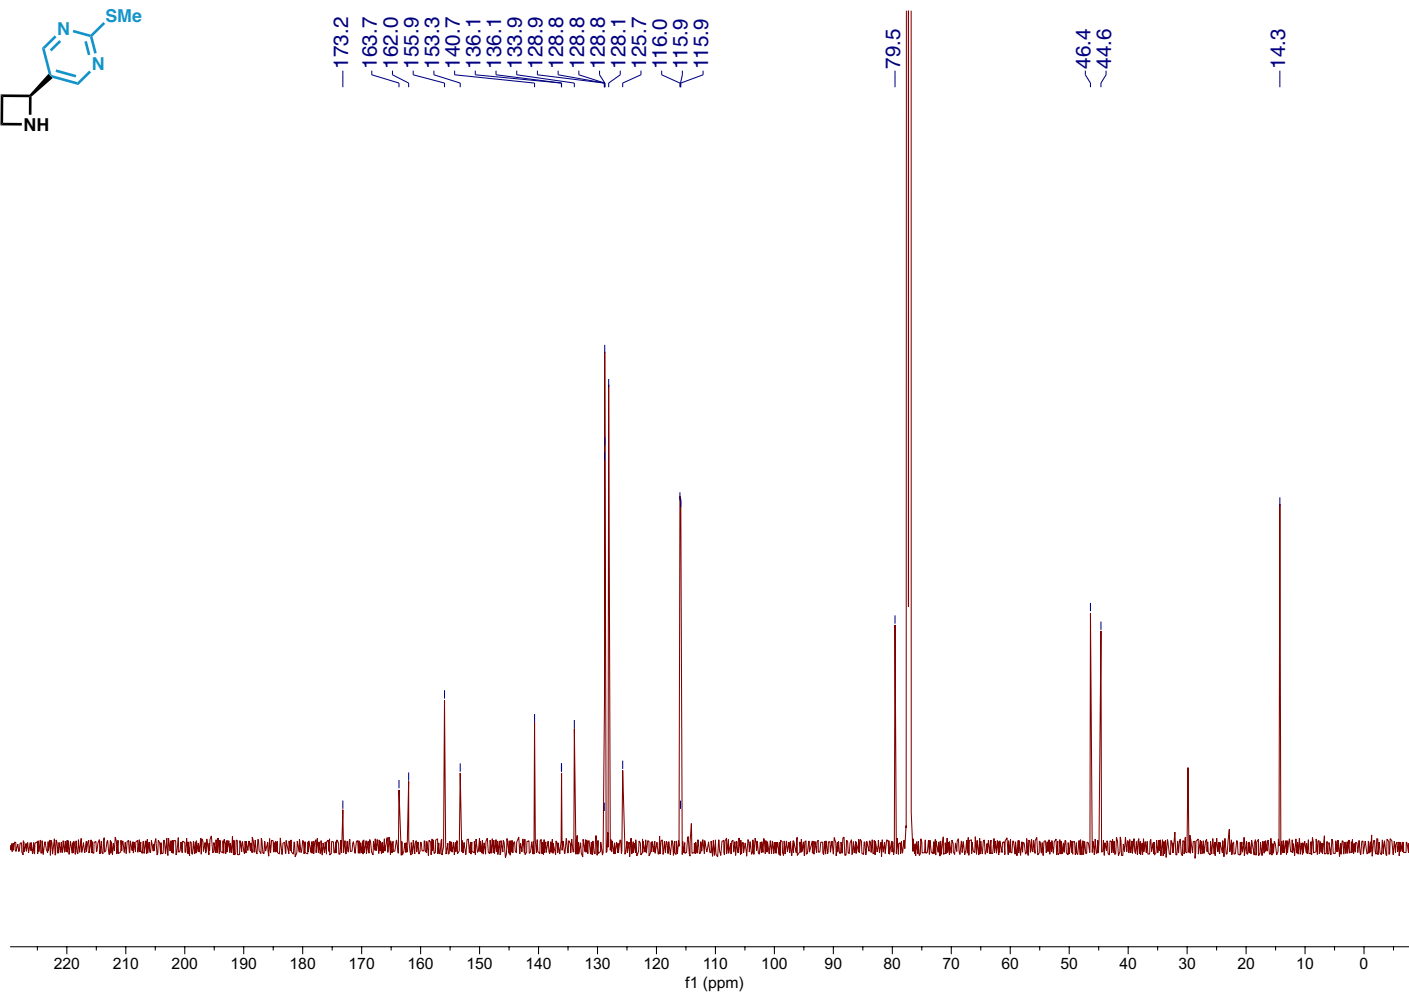

Compound 82 – <sup>1</sup>H NMR

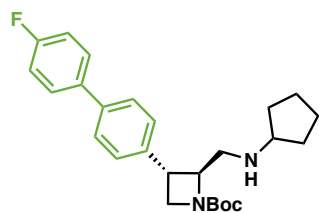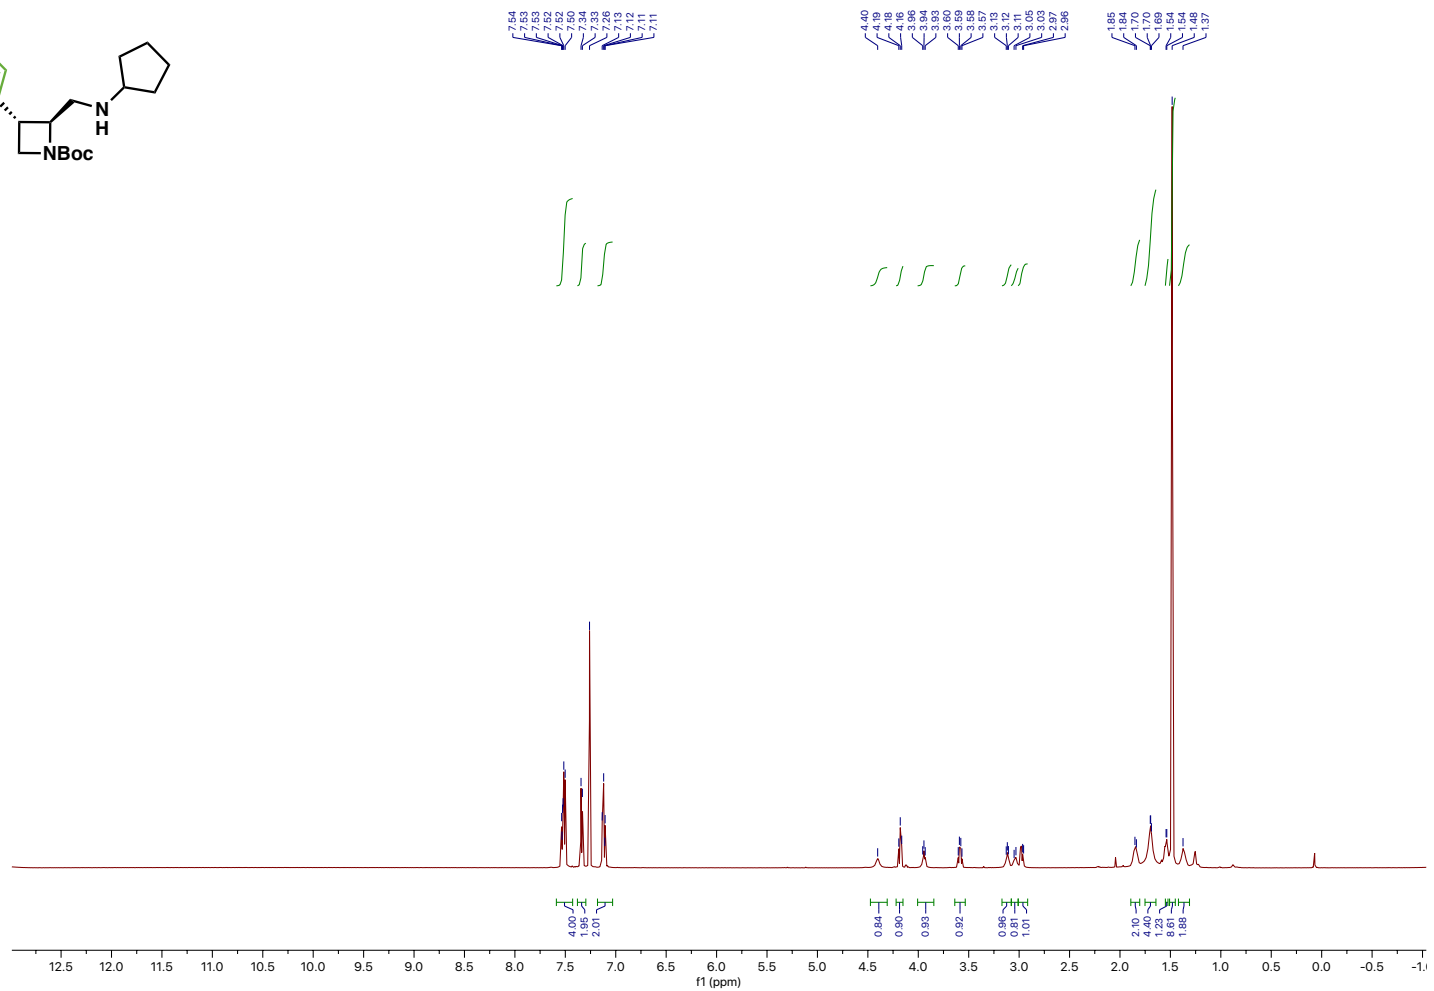

Compound 82 –  $^{19}\text{F}$  NMR

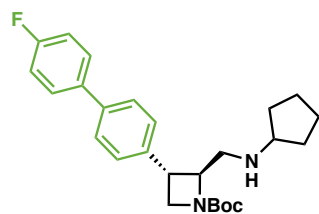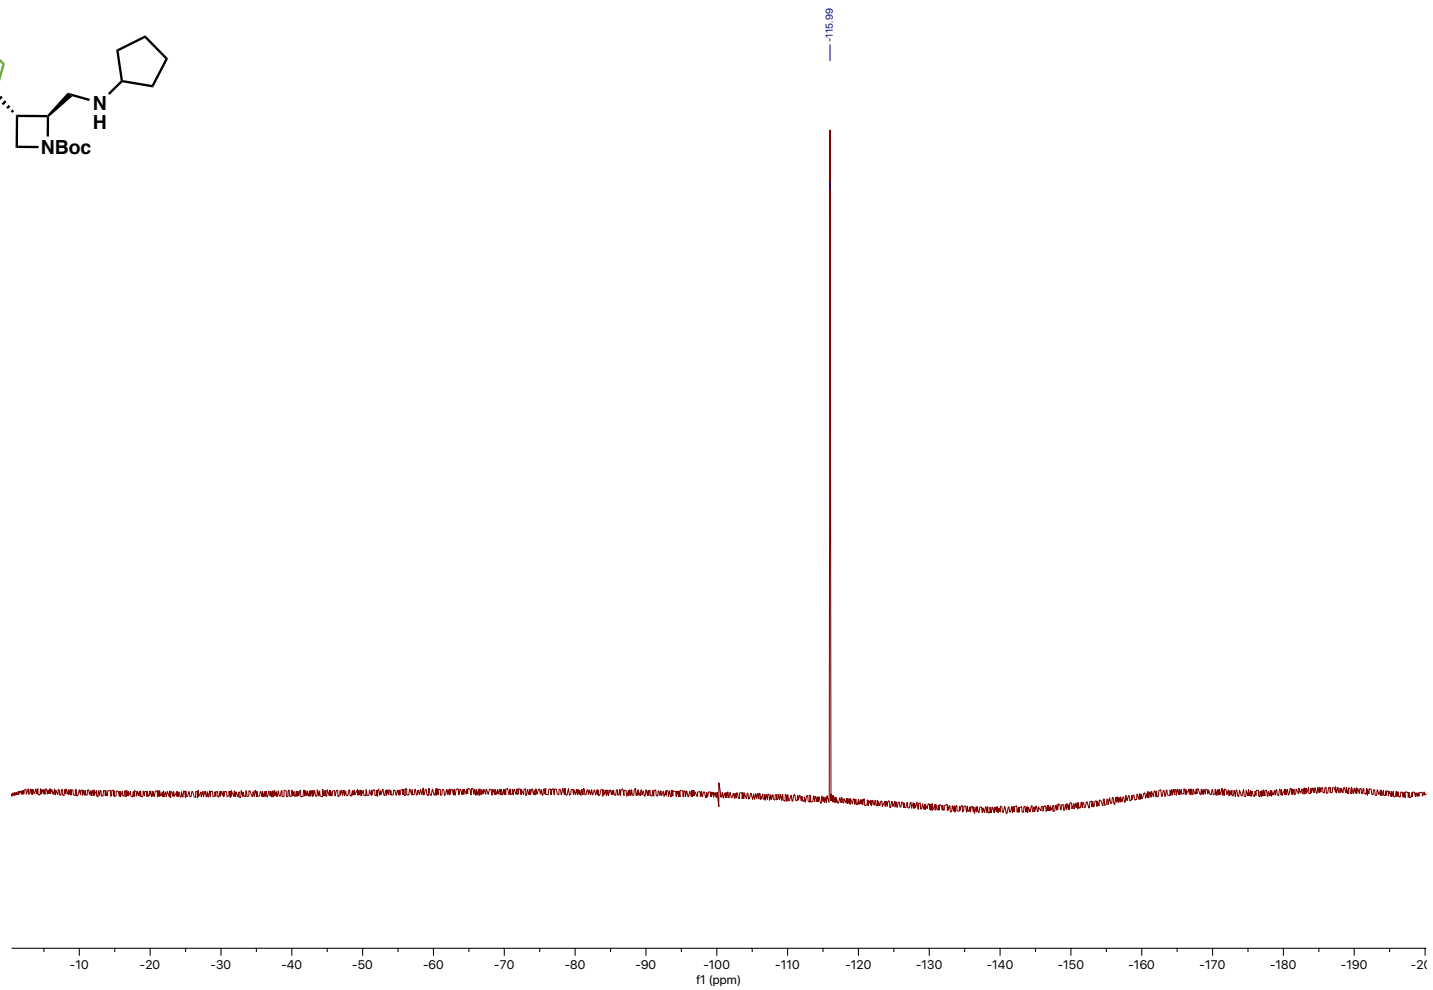

Compound 82 – <sup>13</sup>C NMR

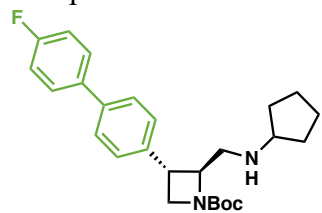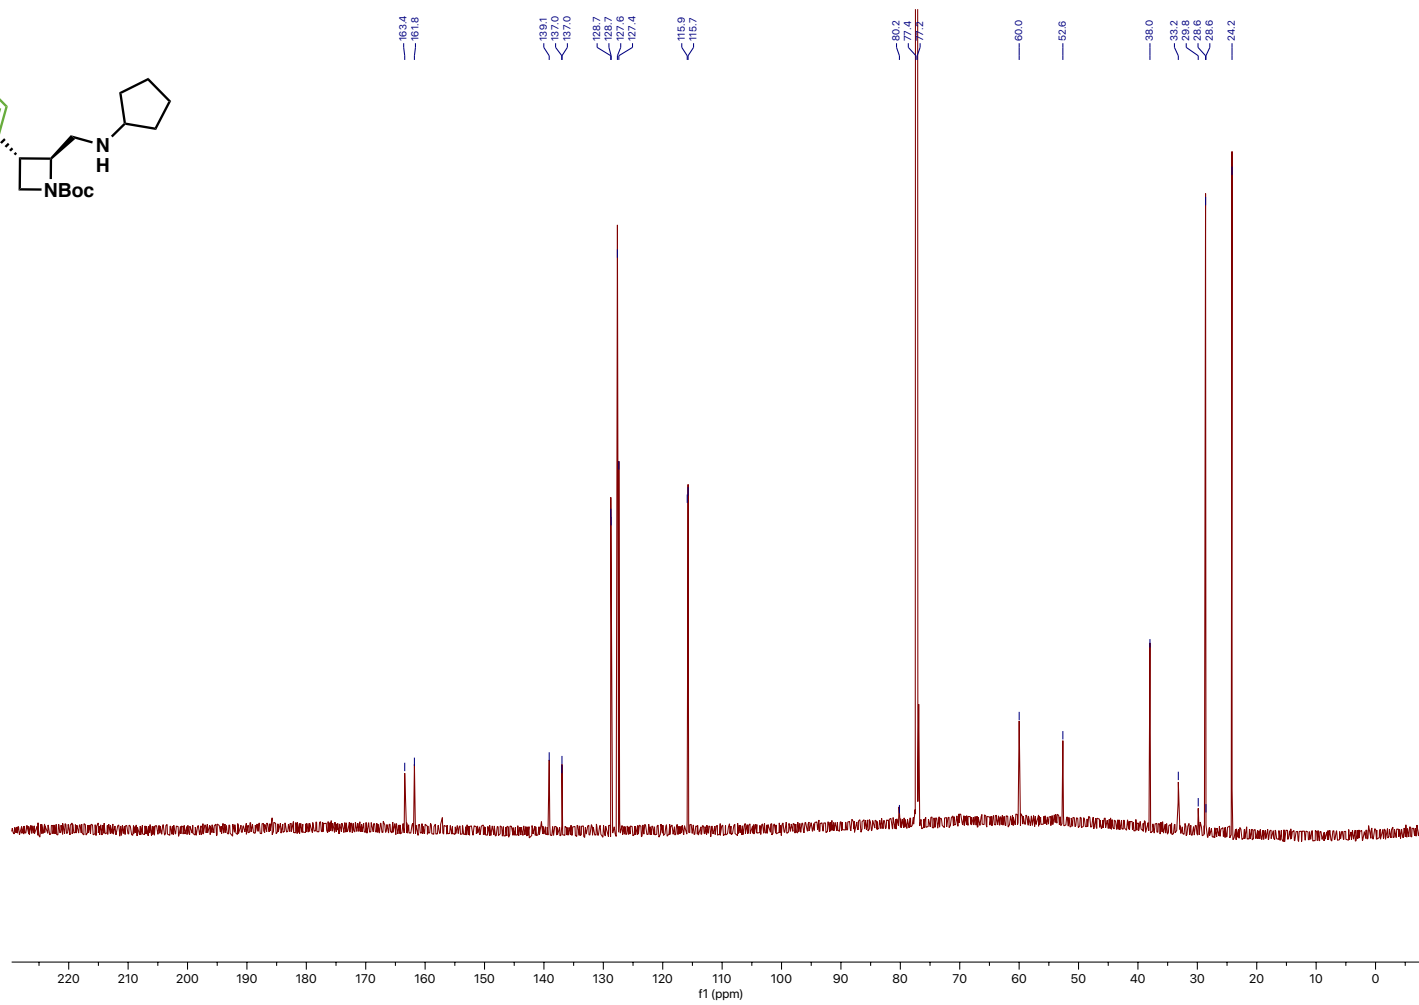

Compound 83 – <sup>1</sup>H NMR

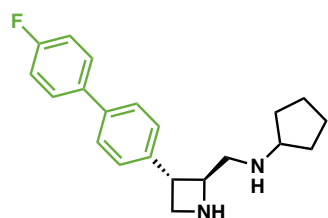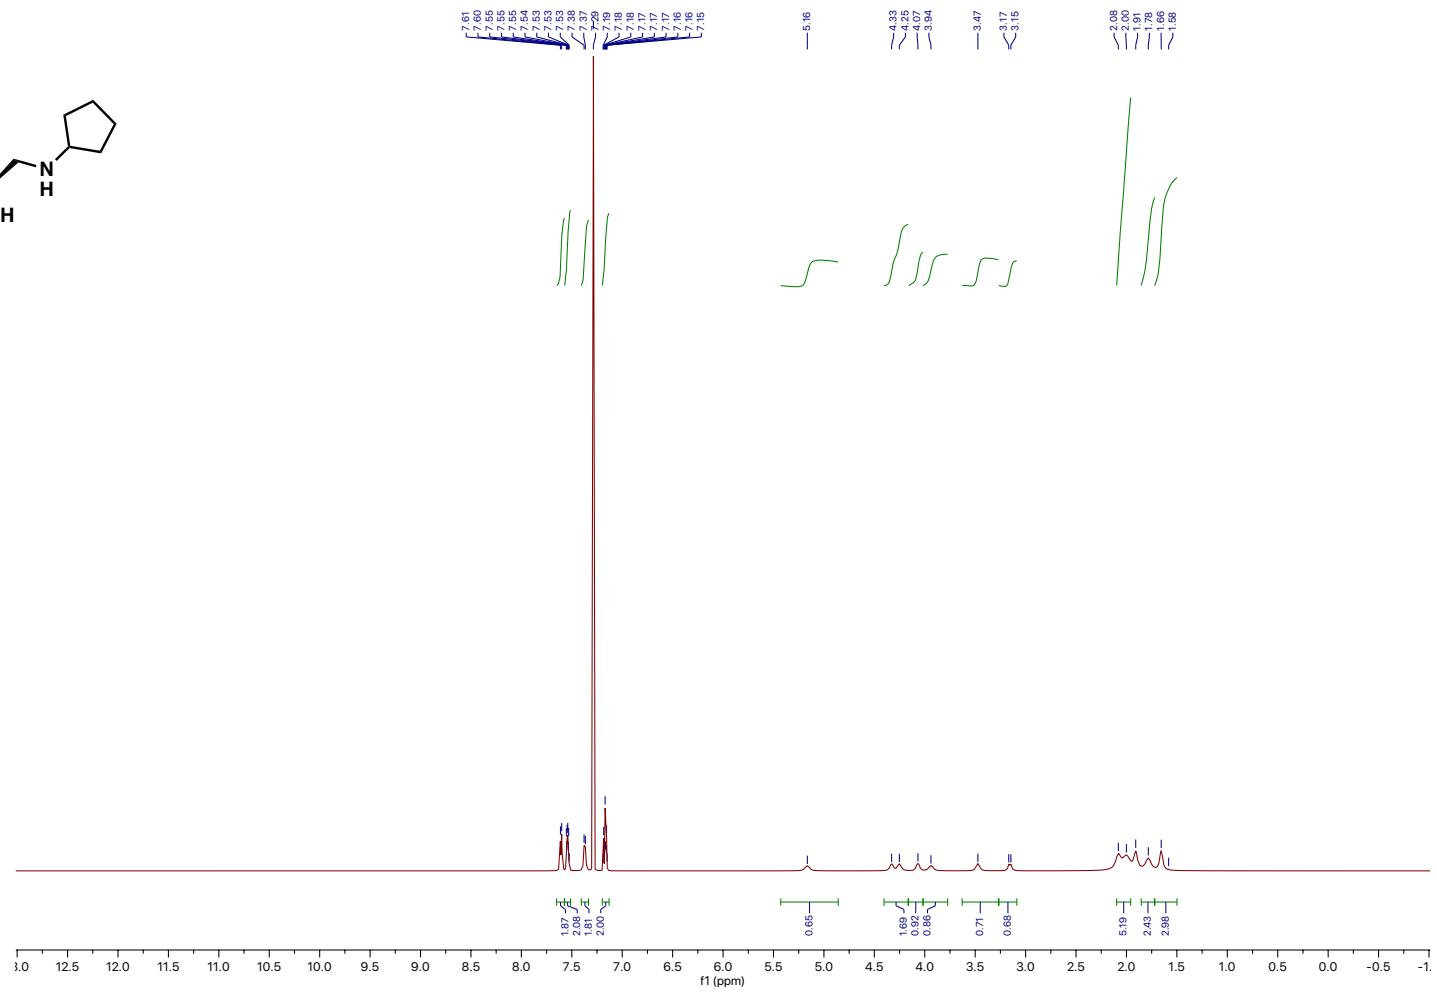

Compound 83 –  $^{19}\text{F}$  NMR

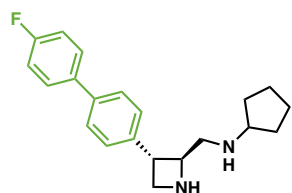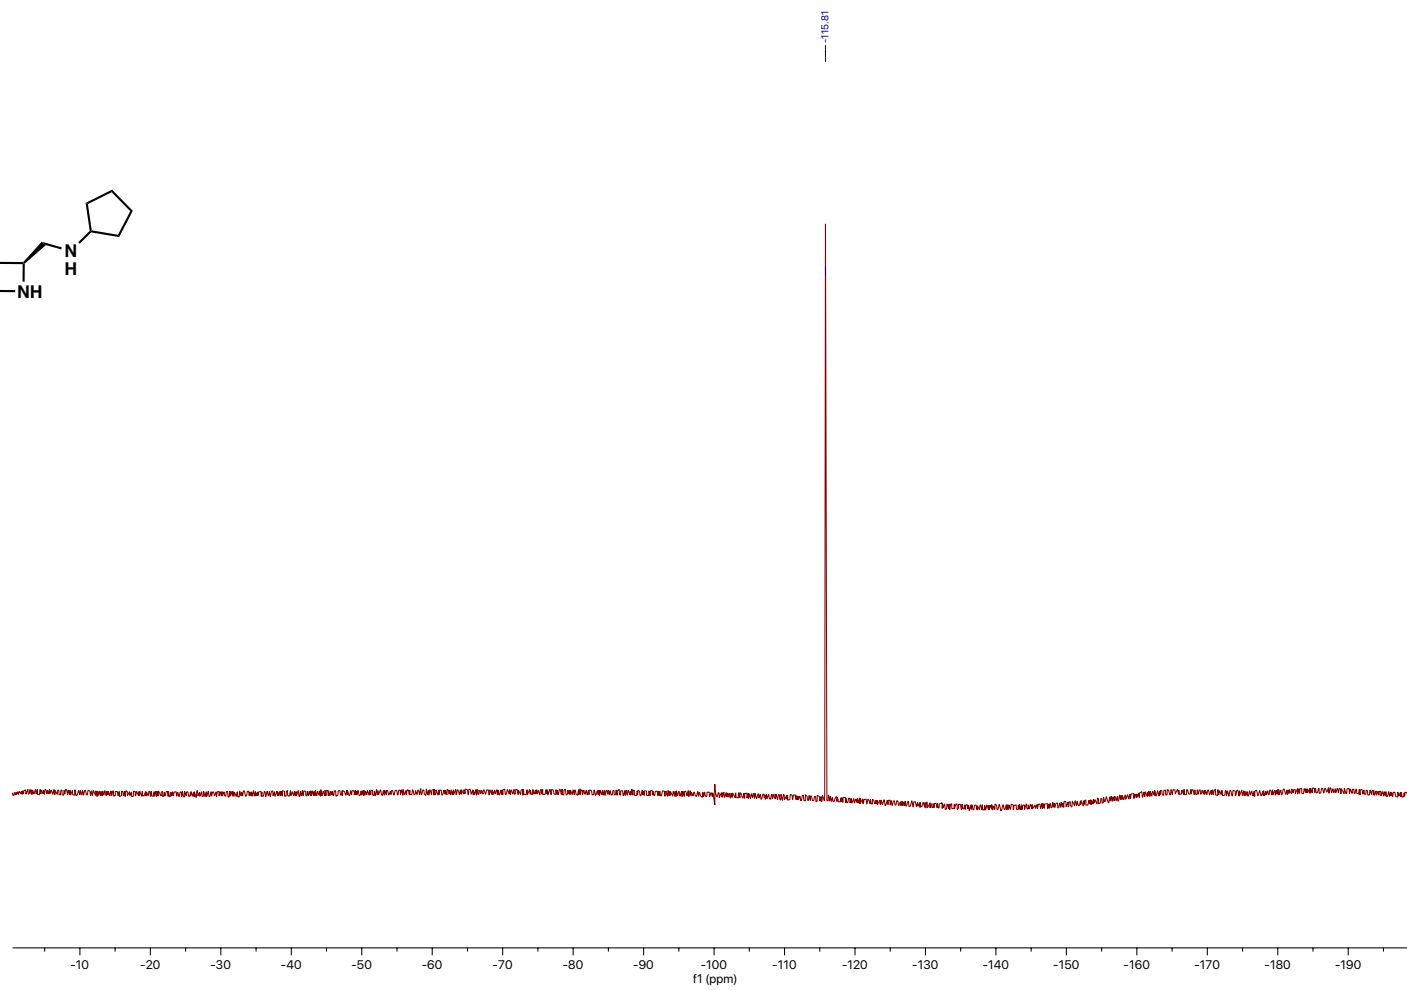

Compound 83 – <sup>13</sup>C NMR

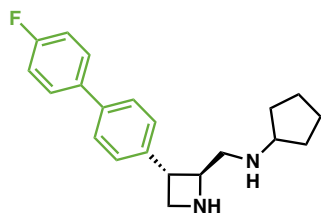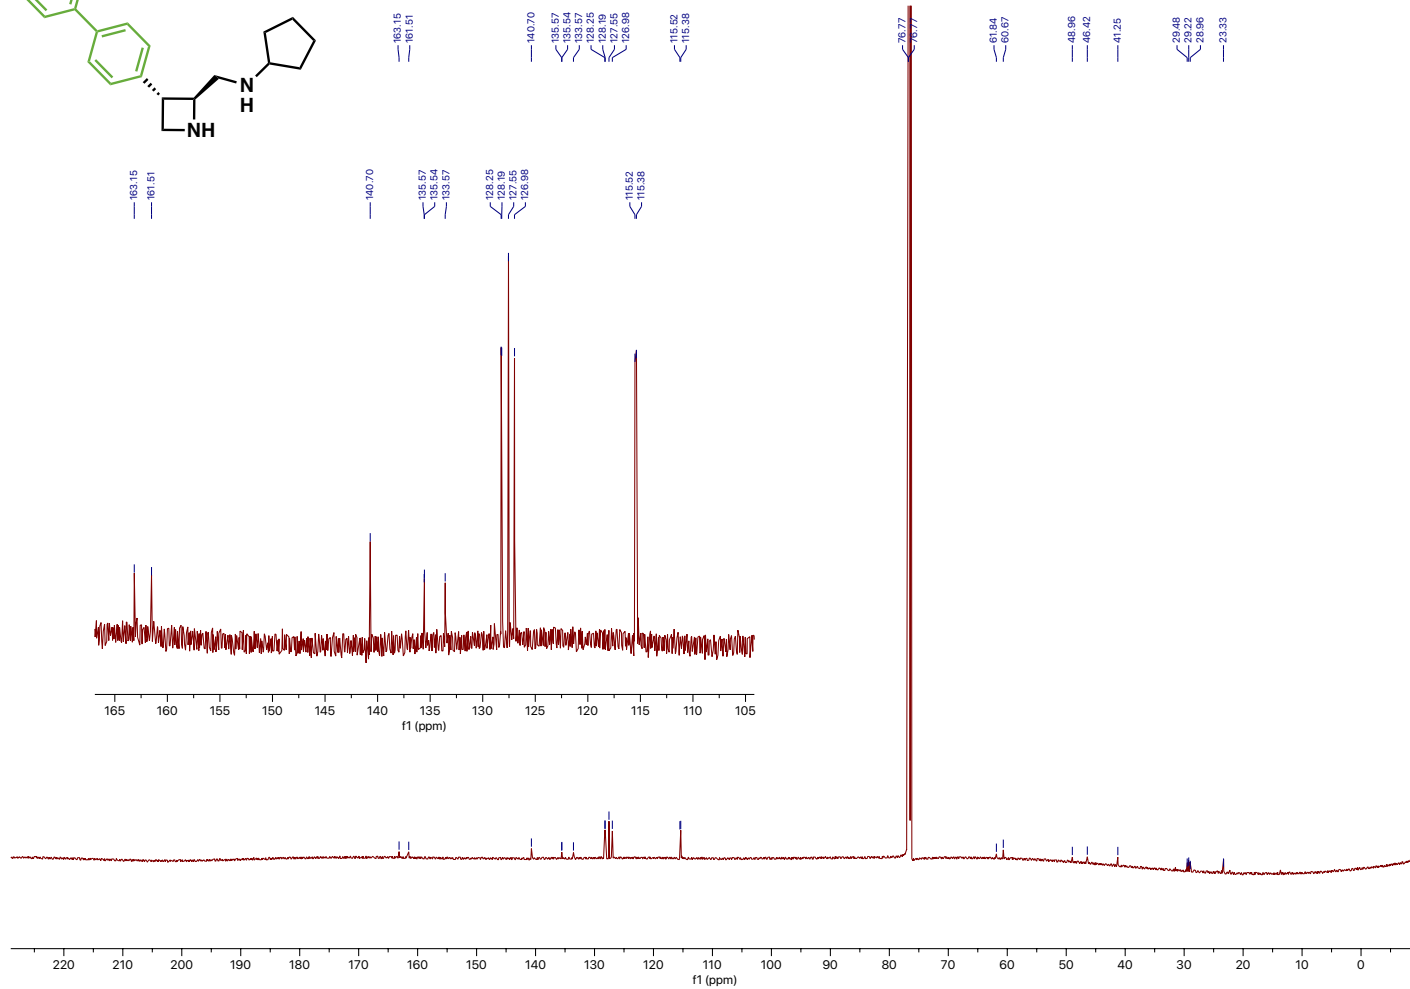

## References

---

- <sup>1</sup> (a) Yoo, E. J.; Ma, S.; Mei, T.-S.; Chan, K. S. L.; Yu, J.-Q. *J. Am. Chem. Soc.* **2011**, *133*, 7652–7655. (b) Chan, K. S. L.; Wasa M.; Wang X.; Yu J.-Q. *Angew. Chem., Int. Ed.* **2011**, *50*, 9081–9084.
- <sup>2</sup> a) Chen, G.; Gong, W.; Zhe, Z.; Andra, M. S.; Chen, Y.-Q.; Hong, X.; Yang, Y.-F.; Liu, T.; Houk, K.N.; Yu, J.-Q. *Science*. **2016**, *353*, 1023–1027. b) Wu, Q.-F.; Wang, X.-B.; Shen, P.-X.; Yu, J.-Q. *ACS Catal.* **2018**, *8*, 2577–2581.
- <sup>3</sup> Shen, P.-X.; Hu, L.; Shao, Q.; Hong, K.; Yu, J.-Q. *J. Am. Chem. Soc.* **2018**, *140*, 6545–6549.
- <sup>4</sup> Maetani, M.; Zoller, J.; Melillo, B.; Verho, O.; Kato, N.; Pu, J.; Comer, E.; Schreiber, S. L. *J. Am. Chem. Soc.* **2017**, *139*, 32, 11300.
- <sup>5</sup> Affron, D. P.; Bull, J. A. *Eur. J. Org. Chem.* **2016**, 139–149.
- <sup>6</sup> Toriyama, F.; Cornella, J.; Wimmer, L.; Chen, T.-G.; Dixon, D. D.; Creech, G.; Baran, P. S. *J. Am. Chem. Soc.* **2016**, *138*, 11132–11135.
- <sup>7</sup> Wang, J.; Qin, T.; Chen, T-G; Wimmer, L.; Edwards, J. T.; Cornella, J.; Vokits, B.; Shaw, S. A.; Baran, P. S. *Angew. Chem. Int. Ed.* **2016**, *55*, 9676–9679.
- <sup>8</sup> Qin, T.; Cornella, J.; Li, C.; Malins, L. R.; Edwards, J. T.; Kawamura, S.; Maxwell, B. D.; Eastgate, M. D.; Baran, P. S. *Science* **2016**, *352*, 801–805.
- <sup>9</sup> Edwards, J. T.; Merchant, R. R.; McClymont, K. S.; Knouse, K. W.; Qin, T.; Malins, L. R.; Vokits, B.; Shaw, S. A.; Bao, D.-H.; Wei, F.-L.; Zhou, T.; Eastgate, M. D.; Baran, P. S. *Nature* **2017**, *545*, 213–218.



- 
- <sup>10</sup> Sämann, C.; Schade, M. A.; Yamada, S.; Knochel, P. Functionalized Alkenylzinc. *Angew. Chem. Int. Ed.* **2013**, *52*, 9495–9499.
- <sup>11</sup> Cornella, J.; Edwards, J. T.; Qin, T.; Kawamura, S.; Wang, J.; Pan, C. M.; Gianatassio, R.; Schmidt, M.; Eastgate, M. D.; Baran, P. S. *J. Am. Chem. Soc.* **2016**, *138*, 2174–2177.
- <sup>12</sup> Boymond, L.; Rottländer, M.; Cahiez, G.; Knochel, P. *Angew. Chem. Int. Ed.* **1998**, *37*, 1701–1703.
- <sup>13</sup> Smith, J. M.; Qin, T.; Merchant, R. R.; Edwards, J. T.; Malins, L. R.; Liu, Z.; Che, G.; Shen, Z.; Shaw, S. A.; Eastgate, M. D.; Baran, P. S. *Angew. Chem. Int. Ed.* **2017**, *56*, 11906–11910.
- <sup>14</sup> Li, C.; Wang, J.; Barton, L. M.; Yu, S.; Tian, M.; Peters, D. S.; Kumar, M.; Yu, A. W.; Johnson, K. A.; Chatterjee, A. K.; Yan, M.; Baran, P. S. *Science* **2017**, *356*, eaam7355.
- <sup>15</sup> Qin, T.; Malins, L. R.; Edwards, J. T.; Merchant, R. R.; Novak, A. J. E.; Zhong, J. Z.; Mills, R. B.; Yan, M.; Yuan, C.; Eastgate, M. D.; Baran, P. S. *Angew. Chem. Int. Ed.* **2017**, *56*, 260–265.
- <sup>16</sup> a) Wirth, H. O.; Königstein, O.; Kern, W. *Justus Liebigs Ann. Chem.* **1960**, *634*, 84 – 104. b) Dewar, M. J. S.; Marchand, A. P. *J. Am. Chem. Soc.* **1966**, *88*, 3318–3327. c) Wrobel, J.; Dietrich, A.; Gorham, B. J.; Sestanj, K. *J. Org. Chem.* **1990**, *55*, 2694–2702.
- <sup>17</sup> a) Yee, N. K. A. Practical One-Pot Synthesis of *trans*-4,5-Disubstituted 2-Pyrrolidinones and The Related Pyrrolidines. *Tetrahedron Letters*, **1997**, *38*, 5091–5093. b) Yee, N. K.; Nummy, L. J.; Byrne, D. P.; Smith, L. L.; Roth, G. P. Practical Synthesis of an Enantiomerically Pure *trans*-4,5-Disubstituted 2-Pyrrolidinone via Enzymatic Resolution. Preparation of the LTB<sub>4</sub> Inhibitor BIRZ-227. *J. Org. Chem.* **1998**, *63*, 326–330.
